# Supplementary material for: Initiation of HIV-1 Gag lattice assembly is required for recognition of the viral genome packaging signal
Source: eLife journal article supplement (doi:10.7554/elife.83548), 2023-01-23
Supplement: supp [file Fig 1B, 1C.xlsx]

## Sheet: Gag
bp	CLIP27_density	CLIP30_density	CLIP32_density	CLIP35_density	CLIP38_density	CLIP39_density	CLIP46_density	Average Read Density
1	1.8607e-05	3.86175e-06	7.41749e-06	1.09324e-05	4.77924e-06	9.13479e-06	0	7.81896e-06
2	3.01e-05	6.75807e-06	9.98509e-06	1.83311e-05	5.57578e-06	1.51248e-05	0	1.22678e-05
3	3.1741e-05	8.68894e-06	1.14115e-05	2.04292e-05	7.16886e-06	1.66223e-05	0	1.37232e-05
4	4.8707e-05	9.65438e-06	1.71173e-05	3.23555e-05	8.76194e-06	2.42596e-05	0	2.01222e-05
5	5.3358e-05	9.65438e-06	1.82584e-05	3.34598e-05	8.76194e-06	2.47089e-05	0	2.11717e-05
6	5.4453e-05	1.01371e-05	1.82584e-05	3.41223e-05	8.76194e-06	2.60566e-05	0	2.16842e-05
7	5.4453e-05	1.06198e-05	1.8829e-05	3.46745e-05	8.76194e-06	2.66556e-05	0	2.19991e-05
8	6.1294e-05	1.30334e-05	2.05408e-05	3.77665e-05	8.76194e-06	2.89019e-05	0	2.43283e-05
9	6.8134e-05	1.39989e-05	2.31083e-05	4.17419e-05	1.11516e-05	3.12979e-05	6.5602e-06	2.7999e-05
10	7.7438e-05	1.59297e-05	2.90994e-05	4.71529e-05	1.11516e-05	3.50416e-05	6.5602e-06	3.17676e-05
11	8.0722e-05	1.64125e-05	2.967e-05	4.79259e-05	1.35412e-05	3.60899e-05	6.5602e-06	3.29887e-05
12	8.1542e-05	1.64125e-05	3.02406e-05	4.81467e-05	1.35412e-05	3.62397e-05	6.5602e-06	3.32405e-05
13	8.209e-05	1.64125e-05	3.05258e-05	4.85885e-05	1.35412e-05	3.63894e-05	1.312e-05	3.43811e-05
14	0.00016226	2.26878e-05	4.93549e-05	9.78395e-05	1.99135e-05	8.77539e-05	3.9361e-05	6.84536e-05
15	0.00016527	2.26878e-05	4.99254e-05	0.000100048	2.071e-05	9.00001e-05	3.9361e-05	6.97153e-05
16	0.00016856	2.26878e-05	4.99254e-05	0.000101373	2.15066e-05	9.19469e-05	3.9361e-05	7.07655e-05
17	0.00016856	2.26878e-05	4.99254e-05	0.000102146	2.15066e-05	9.26956e-05	3.9361e-05	7.09829e-05
18	0.0001702	2.46187e-05	5.10666e-05	0.00010303	2.30997e-05	9.31449e-05	3.9361e-05	7.20743e-05
19	0.00020605	5.06855e-05	6.96103e-05	0.000131851	2.54893e-05	0.000112463	7.8723e-05	9.64096e-05
20	0.00020687	5.06855e-05	6.98956e-05	0.000132735	2.54893e-05	0.000113062	7.8723e-05	9.67794e-05
21	0.00020988	5.21337e-05	7.07515e-05	0.000134833	2.54893e-05	0.000114709	8.5283e-05	9.90108e-05
22	0.0002055	5.06855e-05	6.84692e-05	0.000132072	2.15066e-05	0.000112013	8.5283e-05	9.6504e-05
23	0.00028458	6.80634e-05	8.75835e-05	0.000163213	2.70824e-05	0.000134476	9.8403e-05	0.000123343
24	0.00042687	8.35104e-05	0.000113545	0.000209372	3.50478e-05	0.000163977	9.8403e-05	0.000161532
25	0.00044712	8.83376e-05	0.000115256	0.000217765	3.50478e-05	0.000166523	9.8403e-05	0.000166921
26	0.0004504	8.83376e-05	0.000115827	0.000219752	3.58443e-05	0.00016787	9.8403e-05	0.000168062
27	0.00045177	8.88203e-05	0.000115827	0.000220304	3.58443e-05	0.000168469	9.8403e-05	0.000168491
28	0.00045204	8.78549e-05	0.000116398	0.000220525	3.58443e-05	0.000168619	9.8403e-05	0.000168526
29	0.00045697	8.73722e-05	0.000115542	0.000222734	3.50478e-05	0.000170416	9.8403e-05	0.000169497
30	0.00041565	8.15795e-05	0.000104986	0.000211249	3.42512e-05	0.000163228	9.8403e-05	0.000158478
31	0.00055493	0.000101371	0.000154626	0.000297604	5.81474e-05	0.000224476	0.00015088	0.000220291
32	0.00056998	0.000103302	0.000158906	0.000309641	6.13336e-05	0.000231814	0.00015745	0.000227488
33	0.00057682	0.000106198	0.000160617	0.000315383	6.37232e-05	0.000236157	0.00015745	0.000230906
34	0.00058311	0.000108129	0.000163755	0.000325432	6.37232e-05	0.000238703	0.00015745	0.000234328
35	0.00058284	0.000108612	0.00016347	0.000327199	6.45197e-05	0.000239451	0.00015745	0.000234791
36	0.00058174	0.000109577	0.000162044	0.000326868	6.69093e-05	0.000239002	0.00015088	0.000233861
37	0.000631	0.000111508	0.000170032	0.000339346	6.9299e-05	0.000243495	0.00015745	0.000246017
38	0.00073197	0.000115853	0.000194852	0.000362315	7.40782e-05	0.000256673	0.00016401	0.000271392
39	0.00076973	0.00011537	0.000203411	0.000368278	7.48747e-05	0.000258919	0.00017713	0.000281101
40	0.00077547	0.000113922	0.000206263	0.000368941	7.64678e-05	0.000259368	0.00016401	0.000280635
41	0.00077246	0.000112474	0.000203411	0.000364634	7.80609e-05	0.000254277	0.00015745	0.000277538
42	0.00077356	0.000112474	0.000204266	0.000365628	7.80609e-05	0.000254277	0.00015088	0.000277021
43	0.00077301	0.000112474	0.000203981	0.000364855	7.72644e-05	0.000253378	0.00015088	0.00027655
44	0.0007555	0.000111025	0.000198846	0.000355469	7.64678e-05	0.000244243	0.0001312	0.000267536
45	0.00065836	8.97858e-05	0.000178305	0.000294623	6.85024e-05	0.000191381	0.00011152	0.000227497
46	0.00067231	9.31648e-05	0.000189717	0.000305997	7.56713e-05	0.000199917	0.0001312	0.000238284
47	0.00067478	9.4613e-05	0.000192284	0.000308868	7.72644e-05	0.000201564	0.0001312	0.000240082
48	0.00066794	8.88203e-05	0.000187434	0.000298377	7.72644e-05	0.000193328	0.00012464	0.000233972
49	0.00066137	8.44758e-05	0.000185437	0.000288991	7.48747e-05	0.000185691	0.00012464	0.000229355
50	0.0006663	8.68894e-05	0.00019314	0.000297163	8.04505e-05	0.00019243	0.00013776	0.000236305
51	0.0006611	8.68894e-05	0.000191714	0.000296279	7.9654e-05	0.00019213	0.0001312	0.000234138
52	0.00066082	8.68894e-05	0.000191714	0.00029639	7.9654e-05	0.00019228	0.0001312	0.000234136
53	0.00065973	8.68894e-05	0.000190858	0.000295506	7.88574e-05	0.000191681	0.0001312	0.000233532
54	0.00065617	8.54413e-05	0.000189717	0.000294623	7.88574e-05	0.000190932	0.0001312	0.000232421
55	0.00065508	8.54413e-05	0.000189431	0.000293739	7.88574e-05	0.000190333	0.0001312	0.000232012
56	0.0006143	8.35104e-05	0.000180873	0.000275519	7.32817e-05	0.000181498	0.00012464	0.00021909
57	0.00055411	7.43387e-05	0.000172885	0.000258734	7.24851e-05	0.000170566	0.00011808	0.000203028
58	0.00038856	4.92374e-05	0.000137224	0.000193029	5.09785e-05	0.000128037	9.8403e-05	0.000149352
59	0.00038445	4.87546e-05	0.000136082	0.000191924	5.09785e-05	0.000127588	9.1843e-05	0.000147375
60	0.00027555	4.10311e-05	9.21481e-05	0.000152501	4.22166e-05	0.000101681	7.8723e-05	0.000111978
61	0.00020796	2.84804e-05	7.93101e-05	0.00012125	3.18616e-05	8.59569e-05	7.2162e-05	8.95689e-05
62	0.00018771	2.7515e-05	7.38897e-05	0.000114845	3.02685e-05	8.31116e-05	6.5602e-05	8.32777e-05
63	0.00016226	2.65496e-05	6.64722e-05	0.000107888	2.86754e-05	7.60733e-05	5.9042e-05	7.52807e-05
64	0.00014749	2.55841e-05	6.3334e-05	0.000104244	2.86754e-05	7.39768e-05	5.9042e-05	7.17635e-05
65	0.00010042	1.83433e-05	4.59314e-05	7.85145e-05	2.23031e-05	5.55575e-05	5.2482e-05	5.3365e-05
66	0.00010453	2.02742e-05	4.93549e-05	9.24285e-05	2.30997e-05	6.21465e-05	7.2162e-05	6.05705e-05
67	0.00010371	2.02742e-05	4.90696e-05	9.20972e-05	2.30997e-05	6.21465e-05	7.2162e-05	6.03652e-05
68	0.00010234	2.02742e-05	4.82137e-05	9.09929e-05	2.30997e-05	6.1248e-05	7.2162e-05	5.97613e-05
69	4.9527e-05	1.30334e-05	3.3664e-05	6.95698e-05	2.071e-05	4.89685e-05	5.2482e-05	4.11364e-05
70	4.7065e-05	1.30334e-05	3.25229e-05	6.79134e-05	1.99135e-05	4.77705e-05	5.2482e-05	4.01e-05
71	4.1592e-05	1.2068e-05	2.93847e-05	6.36067e-05	1.83204e-05	4.46257e-05	5.2482e-05	3.74399e-05
72	2.8731e-05	6.75807e-06	2.28231e-05	4.83676e-05	9.55848e-06	3.38436e-05	3.9361e-05	2.70634e-05
73	3.0373e-05	1.01371e-05	2.73877e-05	5.3116e-05	1.19481e-05	3.96839e-05	3.9361e-05	3.02868e-05
74	3.4204e-05	1.11025e-05	3.10964e-05	6.22816e-05	1.51343e-05	4.65724e-05	3.9361e-05	3.42504e-05
75	2.5721e-05	1.06198e-05	2.45348e-05	5.20117e-05	1.27446e-05	3.96839e-05	2.6241e-05	2.73653e-05
76	8.7836e-05	0.000105715	0.000113545	0.000280819	0.000144174	0.000265208	7.2162e-05	0.00015278
77	8.811e-05	0.000107164	0.000114686	0.000286341	0.000149749	0.000270599	7.2162e-05	0.000155544
78	8.8657e-05	0.000107164	0.000114686	0.000286782	0.000149749	0.000271198	7.2162e-05	0.000155771
79	8.8657e-05	0.000107164	0.000114686	0.000287003	0.000149749	0.000271648	6.5602e-05	0.00015493
80	8.7562e-05	0.000107164	0.000114401	0.00028612	0.000149749	0.000271498	6.5602e-05	0.000154585
81	8.9204e-05	0.000112474	0.000116968	0.000292193	0.000155325	0.000276739	6.5602e-05	0.000158358
82	8.8383e-05	0.000118749	0.000116968	0.000294733	0.000156918	0.000279435	6.5602e-05	0.000160113
83	8.9751e-05	0.000124542	0.00011868	0.000303236	0.000158511	0.000286922	6.5602e-05	0.000163892
84	8.8931e-05	0.000125024	0.00011868	0.00030412	0.000158511	0.000289168	6.5602e-05	0.000164291
85	0.00010398	0.000199363	0.000163755	0.000406707	0.000226217	0.000387854	9.1843e-05	0.000225674
86	0.00011	0.000218189	0.000180302	0.000431885	0.000240555	0.000407322	9.8403e-05	0.000240951
87	0.00011465	0.000229774	0.000186864	0.000440499	0.000250114	0.00041451	0.00010496	0.000248768
88	0.00012642	0.000266944	0.000206834	0.000483455	0.000277196	0.000452846	0.00011152	0.000275031
89	0.00012751	0.000271771	0.00020826	0.000487872	0.000279585	0.000455392	0.00011152	0.000277417
90	0.00012724	0.000273702	0.00020826	0.000489308	0.000282772	0.000457189	0.00011152	0.00027857
91	0.00012532	0.000276598	0.00020769	0.000487431	0.000282772	0.00045614	9.8403e-05	0.000276337
92	0.00012806	0.000286252	0.000211684	0.000496154	0.000288347	0.000463628	0.00011152	0.000283664
93	0.00012779	0.00028577	0.000210257	0.000495161	0.000289144	0.00046228	0.00011152	0.000283132
94	0.00011958	0.00028577	0.000207119	0.000487431	0.000286754	0.000455242	0.00011152	0.00027906
95	8.0722e-05	0.000269357	0.000169176	0.00041764	0.00026923	0.000389501	0.00010496	0.000242941
96	0.00013983	0.000376521	0.000284432	0.000544191	0.00044208	0.000511997	0.00025585	0.000364985
97	0.0001494	0.000421897	0.000309823	0.000548718	0.000470755	0.000518437	0.00030177	0.000388686
98	0.00015077	0.000424793	0.000311535	0.000548829	0.000471552	0.000518287	0.00030177	0.000389648
99	0.0001505	0.000427206	0.000313532	0.000546951	0.000473145	0.000517089	0.00030177	0.000390027
100	0.00014749	0.000432999	0.000316385	0.000514044	0.000465976	0.00048669	0.00030177	0.000380764
101	0.00041319	0.00137527	0.000970265	0.00100755	0.00151661	0.00101052	0.00160069	0.00112773
102	0.00042139	0.00142933	0.000993944	0.00102952	0.00154847	0.00102909	0.00167286	0.00116066
103	0.00043918	0.00149064	0.00104958	0.00106939	0.00161777	0.00106862	0.00177782	0.00121614
104	0.00064988	0.00180537	0.00144841	0.00134325	0.00205428	0.00134446	0.00239448	0.00157716
105	0.00066274	0.00183964	0.00149149	0.0013724	0.00209171	0.00137202	0.00247976	0.00161568
106	0.00082391	0.00198977	0.00163527	0.00156234	0.00224465	0.00154707	0.00293898	0.00182028
107	0.00083075	0.00200184	0.00164183	0.00156576	0.00224545	0.00154887	0.00297834	0.00183041
108	0.00086331	0.00205976	0.00166437	0.00161402	0.00228766	0.00159454	0.00305706	0.00187725
109	0.00086304	0.00205976	0.00166095	0.00160099	0.00228607	0.00158212	0.00305706	0.00187286
110	0.00087316	0.00209886	0.00167264	0.0016265	0.00231315	0.00160188	0.00312922	0.0019022
111	0.00088848	0.00211624	0.00168691	0.00166117	0.00233386	0.00162914	0.0031489	0.00192353
112	0.00089916	0.00212734	0.00169062	0.00168227	0.0023482	0.00164576	0.00317514	0.00193835
113	0.00089478	0.00211527	0.00167949	0.00166228	0.00234581	0.00163064	0.00317514	0.00192906
114	0.00089587	0.00212493	0.00168006	0.00165908	0.00234661	0.00162884	0.00318827	0.00193195
115	0.00088876	0.00212155	0.00166466	0.00163831	0.00232988	0.00161326	0.00320139	0.00192254
116	0.0008956	0.00213217	0.00167607	0.00164925	0.00234342	0.0016227	0.00322107	0.00193432
117	0.00088739	0.00211286	0.00165496	0.0016233	0.00233147	0.00159859	0.00318827	0.00191383
118	0.0008811	0.00210369	0.00163499	0.0015958	0.00231793	0.00157463	0.0031817	0.00189855
119	0.00089259	0.00211672	0.00164155	0.00161203	0.00232112	0.00158766	0.00322107	0.00191325
120	0.00084115	0.00195405	0.00152943	0.00152446	0.00221836	0.00150439	0.00306362	0.00180507
121	0.00085072	0.00194584	0.00152487	0.00153617	0.0022088	0.00150335	0.00308986	0.00180852
122	0.00080722	0.0018044	0.00142559	0.00145324	0.00207499	0.00141574	0.00299146	0.00171038
123	0.00080393	0.00179185	0.00140761	0.0014486	0.00205587	0.0014093	0.00297834	0.00169936
124	0.00080338	0.00179185	0.00140504	0.00144783	0.00205507	0.0014087	0.00297834	0.0016986
125	0.00076727	0.00175131	0.00133686	0.00139007	0.00201365	0.0013491	0.00294554	0.00165054
126	0.00062197	0.00153843	0.00114201	0.00121416	0.00180496	0.00119261	0.00265689	0.001453
127	0.00057819	0.0014385	0.00105528	0.00113476	0.0016807	0.00111519	0.00251256	0.00135931
128	0.00051306	0.00126907	0.000924334	0.000994959	0.00142262	0.00100093	0.00211895	0.0011777
129	0.00051169	0.00126038	0.000919484	0.000989327	0.00141386	0.000996441	0.00209927	0.00117007
130	0.00050266	0.00122128	0.000893523	0.000962051	0.00137562	0.000974577	0.00200087	0.00113294
131	0.00023724	0.000428172	0.000383998	0.000450547	0.000352071	0.000449551	0.00061666	0.000416891
132	0.00025311	0.000446515	0.000407677	0.000501345	0.000373577	0.000487289	0.00068226	0.000450254
133	0.00025256	0.000447481	0.000408247	0.00050521	0.000373577	0.000489984	0.00068226	0.000451332
134	0.00018853	0.0003799	0.000332646	0.000434204	0.000326581	0.000401332	0.00052482	0.000369716
135	0.00012806	0.000237981	0.000220243	0.000317592	0.000173646	0.000264609	0.00030833	0.00023578
136	0.0001557	0.000255358	0.000248486	0.000357125	0.000203118	0.00030609	0.00034113	0.000266715
137	0.00014585	0.000229292	0.000231939	0.000337027	0.00018639	0.000278836	0.00031489	0.000246317
138	0.00014585	0.000230257	0.000232795	0.000337579	0.00018639	0.000279584	0.00031489	0.000246763
139	0.00014557	0.000230257	0.000232225	0.00033769	0.000185594	0.000279435	0.00031489	0.000246523
140	0.0001453	0.000229774	0.000232225	0.000337579	0.000185594	0.000279285	0.00031489	0.000246378
141	0.00013736	0.000218189	0.000220528	0.000326205	0.000178425	0.000267754	0.00029521	0.000234811
142	0.00012943	0.000208535	0.000210828	0.000313948	0.000171256	0.000254127	0.00029521	0.00022619
143	0.00012313	0.000195501	0.000200272	0.000303457	0.000164884	0.000248436	0.00026241	0.000214013
144	0.00011848	0.000189226	0.000194281	0.000296942	0.000159308	0.000245142	0.00025585	0.000208461
145	0.00010316	0.000170883	0.000171744	0.000276954	0.000144174	0.000229418	0.00023617	0.000190357
146	8.6194e-05	0.000109577	0.000121533	0.000220746	0.000106736	0.000177904	0.00017713	0.000142831
147	9.0572e-05	0.000121163	0.000124671	0.000231237	0.000113109	0.00018629	0.00018369	0.000150104
148	9.0299e-05	0.000119714	0.000124386	0.000229912	0.000113109	0.000185691	0.00018369	0.000149542
149	9.0299e-05	0.000119714	0.0001241	0.00022936	0.000112312	0.000185092	0.00018369	0.000149223
150	8.2363e-05	0.000112474	0.00010898	0.00020871	0.000101957	0.000169068	0.00015745	0.000134428
151	6.8955e-05	9.4613e-05	8.2163e-05	0.00017525	8.68228e-05	0.000147205	0.0001312	0.000112316
152	6.3483e-05	9.65438e-05	7.30338e-05	0.000158906	8.36367e-05	0.000133727	0.00012464	0.000104854
153	7.0871e-05	0.00011006	8.13071e-05	0.000156477	9.31952e-05	0.00013208	0.00014432	0.000112616
154	7.5523e-05	0.0001313	8.81541e-05	0.00015482	0.000105143	0.000130283	0.00015745	0.000120381
155	6.5945e-05	0.000125507	7.38897e-05	0.000131851	9.31952e-05	0.000106772	0.00013776	0.000104989
156	4.9254e-05	0.000113439	5.64871e-05	9.14346e-05	6.21301e-05	6.73878e-05	0.00010496	7.78708e-05
157	7.1692e-05	0.000144333	8.70129e-05	0.000159238	0.000116295	0.000136273	0.00010496	0.000117115
158	7.1692e-05	0.000144816	8.72982e-05	0.000160784	0.000120278	0.000136722	0.00010496	0.000118079
159	6.8134e-05	0.00014385	8.47306e-05	0.00015725	0.000120278	0.000133877	9.8403e-05	0.000115218
160	6.6493e-05	0.000140954	8.416e-05	0.00015482	0.000121074	0.000131481	9.1843e-05	0.000112975
161	8.7015e-05	0.000194536	0.000120392	0.000209703	0.000179221	0.000187039	0.00012464	0.000157507
162	8.7836e-05	0.000196949	0.000121533	0.000212906	0.000180815	0.000188536	0.00012464	0.000159031
163	8.9751e-05	0.000198398	0.000125812	0.000217323	0.000183204	0.000193628	0.00012464	0.000161823
164	0.00010234	0.000209017	0.000135512	0.00024228	0.000193559	0.00021594	0.00014432	0.000177567
165	0.00010371	0.000209017	0.000137224	0.000244599	0.000194356	0.000218037	0.00014432	0.000178752
166	0.00011958	0.000227843	0.00015377	0.00027066	0.00021188	0.000241548	0.00016401	0.000198469
167	0.00012067	0.000232671	0.000156623	0.000274083	0.000213473	0.000244992	0.00017713	0.000202806
168	0.00012149	0.000233636	0.000156909	0.000275408	0.000214269	0.000247538	0.00017713	0.000203768
169	0.00012149	0.000233636	0.000157194	0.000275408	0.000214269	0.000247837	0.00017713	0.000203852
170	0.00012177	0.000233636	0.000156909	0.000275298	0.000214269	0.000247388	0.00017713	0.00020377
171	0.00012177	0.000234602	0.000156623	0.000275077	0.000213473	0.000247089	0.00017713	0.000203679
172	0.0001152	0.000217224	0.000151773	0.000264255	0.00020949	0.000239152	0.00016401	0.000194443
173	0.00011821	0.000226878	0.000153485	0.000265801	0.000211083	0.000241248	0.00017057	0.000198181
174	0.00011739	0.000223016	0.000151488	0.000264476	0.000210287	0.000239451	0.00017057	0.000196667
175	0.00011711	0.000218672	0.000149776	0.000262709	0.0002071	0.000239302	0.00016401	0.000194097
176	0.00010535	0.000198398	0.000134371	0.000236317	0.000182408	0.000218336	0.00013776	0.000173277
177	0.00011109	0.000199846	0.000137509	0.000257077	0.000190373	0.000236606	0.00016401	0.000185216
178	0.00011055	0.000199846	0.000136653	0.000256635	0.000189576	0.000236307	0.00016401	0.000184796
179	8.3732e-05	0.000163159	0.000105271	0.000209593	0.000152936	0.000201714	0.00012464	0.000148721
180	0.0001141	0.000182468	0.000134085	0.00027596	0.000183204	0.000265658	0.00016401	0.000188498
181	0.00012779	0.000184881	0.000141503	0.000290095	0.000184001	0.000280183	0.00017057	0.000197002
182	0.00012861	0.000181985	0.000140077	0.000289101	0.000182408	0.00027629	0.00015745	0.000193702
183	0.00013189	0.000183433	0.000141218	0.000296831	0.000184797	0.00028198	0.00015088	0.000195862
184	0.00012697	0.000179572	0.000139791	0.000291641	0.000187983	0.000278087	0.00015088	0.000193561
185	0.00012231	0.000174744	0.000133515	0.000281482	0.000180815	0.000268802	0.00013776	0.000185634
186	0.00012177	0.000174744	0.000132944	0.000282365	0.000180018	0.000268353	0.0001312	0.000184485
187	0.00011465	0.000164125	0.000125242	0.000265911	0.000173646	0.000251132	0.0001312	0.00017513
188	0.00010453	0.000151574	0.000113545	0.000249678	0.000148953	0.000233611	0.00010496	0.000158122
189	9.112e-05	0.000128403	9.55716e-05	0.000217102	0.000128243	0.000206656	0.00010496	0.000138866
190	9.6592e-05	0.000128886	9.78539e-05	0.00022693	0.000129836	0.000214892	0.00011152	0.000143788
191	9.6319e-05	0.000129369	9.72833e-05	0.000226709	0.000128243	0.000213544	0.00011152	0.000143284
192	9.495e-05	0.000124542	9.52863e-05	0.000224611	0.000125853	0.000212047	0.00011152	0.000141259
193	7.2239e-05	6.03399e-05	6.36193e-05	0.000172047	8.68228e-05	0.000160233	9.8403e-05	0.000101958
194	0.00025037	0.000192605	0.000190858	0.000379763	0.000301092	0.000367937	0.00049202	0.000310664
195	0.00025147	0.000194053	0.000191714	0.000383186	0.000300296	0.000370633	0.00049202	0.000311909
196	0.00025256	0.000194053	0.000192284	0.000385174	0.000300296	0.000371681	0.00049202	0.000312581
197	0.00025256	0.000193088	0.00019257	0.000385505	0.000300296	0.000371981	0.00049202	0.000312574
198	0.00025256	0.000193088	0.00019257	0.000385837	0.000301092	0.00037228	0.00049202	0.000312778
199	0.00024818	0.000190191	0.000190858	0.000379984	0.000300296	0.000365541	0.00048546	0.000308644
200	0.00023642	0.000190191	0.000190858	0.00037126	0.000299499	0.000354759	0.00048546	0.000304063
201	0.00022328	0.000192122	0.000186008	0.000350279	0.000288347	0.000337089	0.00046578	0.000291843
202	0.00027856	0.000262116	0.000259042	0.000461259	0.000349681	0.000440866	0.00056418	0.000373672
203	0.00028348	0.000286252	0.000270739	0.000485774	0.000359239	0.000461382	0.00060354	0.000392916
204	0.00028212	0.00028577	0.0002676	0.00047948	0.000352071	0.000453744	0.00060354	0.000389189
205	0.00028184	0.000286252	0.000266174	0.000478375	0.000348884	0.000452097	0.00060354	0.000388166
206	0.00028102	0.000286735	0.000266459	0.000474842	0.000347291	0.000447605	0.00059698	0.000385847
207	0.00026597	0.000268392	0.000250768	0.000436081	0.000328971	0.000411515	0.00057074	0.000361777
208	0.00039513	0.000422862	0.000437062	0.000593773	0.000505006	0.000565908	0.00071506	0.000519257
209	0.00040881	0.000446515	0.000467302	0.000617957	0.000514565	0.000590467	0.0007413	0.000540988
210	0.00041127	0.000452308	0.000475575	0.000620718	0.000514565	0.000593312	0.00072818	0.000542276
211	0.00041838	0.00046341	0.000485846	0.000629441	0.000520937	0.000600949	0.00073474	0.00055053
212	0.00045314	0.000498166	0.000525501	0.000660803	0.000544833	0.000631049	0.00074786	0.000580193
213	0.00036174	0.000408863	0.000453323	0.000577871	0.000410218	0.000527721	0.00044609	0.000455119
214	0.00060637	0.000622225	0.000767711	0.000947585	0.000665907	0.000894161	0.00078067	0.000754946
215	0.00061348	0.000626087	0.000774272	0.000958739	0.000668297	0.000904194	0.00080035	0.000763631
216	0.00061485	0.000626569	0.000774843	0.000962051	0.000666704	0.00090689	0.00080035	0.000764608
217	0.00061321	0.000626087	0.000774272	0.00096172	0.000666704	0.00090659	0.00080035	0.000764133
218	0.00058694	0.000619811	0.000757155	0.00094096	0.000650773	0.00088862	0.00078723	0.000747355
219	0.00057682	0.00061788	0.000754017	0.000927708	0.000650773	0.000879485	0.00077411	0.000740112
220	0.0007161	0.000838	0.00100735	0.00105757	0.000802912	0.00101097	0.00106932	0.000928888
221	0.00072157	0.000844276	0.0010142	0.00106354	0.000806098	0.00101501	0.00106932	0.000933429
222	0.00072841	0.000863585	0.00102875	0.00107204	0.000812471	0.0010234	0.001089	0.000945378
223	0.00072868	0.000863585	0.00102989	0.00107314	0.000814064	0.00102385	0.001089	0.000946029
224	0.00072348	0.000857792	0.00102219	0.00105536	0.000806895	0.00100348	0.00108244	0.000935948
225	0.00072431	0.000860206	0.00102476	0.00105746	0.000808488	0.00100543	0.001089	0.00093852
226	0.00072485	0.000860206	0.00102476	0.00105669	0.000807691	0.00100393	0.001089	0.00093816
227	0.00072567	0.000860206	0.00102789	0.00105945	0.000809284	0.00100647	0.001089	0.000939711
228	0.00069831	0.000832208	0.000987668	0.0010272	0.000780609	0.00097308	0.00106932	0.000909771
229	0.00072403	0.000871791	0.00102932	0.00105625	0.000802116	0.00100243	0.001089	0.000939276
230	0.00073087	0.000877583	0.00104872	0.00106585	0.000810878	0.00100722	0.00111524	0.000950909
231	0.00078232	0.000918615	0.00111348	0.00111002	0.000851501	0.0010496	0.00120708	0.00100466
232	0.00078122	0.000913787	0.0011092	0.0010928	0.000842739	0.00103702	0.00120708	0.000997693
233	0.00076015	0.000888203	0.00108552	0.00105713	0.000839553	0.00100707	0.00116772	0.000972193
234	0.00081378	0.000901719	0.00110435	0.00110461	0.000871415	0.00104481	0.00124644	0.00101245
235	0.00081105	0.000891582	0.00109437	0.00109677	0.000868228	0.00103822	0.001253	0.0010076
236	0.00070542	0.000813382	0.00100279	0.000981597	0.000785388	0.000937139	0.00116772	0.000913348
237	0.00073005	0.000835104	0.00102504	0.00101208	0.000810878	0.000962897	0.00129892	0.000953567
238	0.00066876	0.000762214	0.000960851	0.000915009	0.000728037	0.000871249	0.00121364	0.000874251
239	0.00092926	0.000845724	0.00109351	0.00108176	0.000841146	0.0010198	0.00145637	0.00103822
240	0.00093309	0.000847172	0.00109551	0.00108573	0.000841146	0.00102355	0.00145637	0.00104036
241	0.00093528	0.000844758	0.00109465	0.00108871	0.000839553	0.00102534	0.00144981	0.00103973
242	0.00093664	0.000845241	0.00109636	0.00109225	0.000839553	0.00102774	0.00144981	0.00104108
243	0.00092187	0.000826898	0.00107725	0.00107292	0.000826808	0.00100887	0.00140389	0.00101979
244	0.00090244	0.000804693	0.00104929	0.00104046	0.000802912	0.000981615	0.00135796	0.000991339
245	0.00089888	0.000796487	0.00103873	0.00103427	0.000786185	0.000977273	0.00132516	0.000979571
246	0.00090135	0.000804693	0.00105214	0.00105238	0.000798929	0.0009906	0.00132516	0.000989322
247	0.00090135	0.000803727	0.00105243	0.00105327	0.000797336	0.000989702	0.00132516	0.000988995
248	0.00089697	0.000797935	0.00103988	0.00104741	0.000791761	0.000986557	0.00130548	0.000980856
249	0.00089204	0.000794073	0.00103217	0.00103792	0.000785388	0.000974577	0.00127924	0.000970773
250	0.00087617	0.00078297	0.00100992	0.00101782	0.000771847	0.000959602	0.00125956	0.000953984
251	0.00087316	0.00078104	0.00100849	0.0010187	0.000774237	0.000960051	0.001253	0.000952669
252	0.00083923	0.000750146	0.000972262	0.000982702	0.000743172	0.000927406	0.00123332	0.000921177
253	0.0008105	0.000711045	0.000932893	0.000931021	0.00070892	0.000891765	0.0012202	0.000886621
254	0.00080694	0.000711045	0.000932607	0.000929365	0.000705734	0.000888321	0.00120708	0.000883013
255	0.00076727	0.000671945	0.000872411	0.000869181	0.00066989	0.000819735	0.0011218	0.000827461
256	0.00076699	0.000671462	0.000871841	0.000869402	0.00066989	0.000818986	0.0011218	0.000827196
257	0.00074018	0.000650705	0.000840459	0.000840359	0.000653959	0.000783945	0.00104963	0.000794177
258	0.00040881	0.00040307	0.000480425	0.000579417	0.000434114	0.000506606	0.00058386	0.000485186
259	0.00039376	0.000382796	0.000454749	0.00055435	0.000417387	0.000469019	0.00056418	0.00046232
260	0.00024463	0.000239429	0.000296985	0.000421615	0.000301092	0.000333794	0.00033457	0.000310302
261	0.00024818	0.000255841	0.00031667	0.000430229	0.000322599	0.000345175	0.00034113	0.000322833
262	0.00012478	0.000123093	0.000172885	0.000293518	0.000171256	0.000209801	0.00014432	0.000177093
263	0.00019565	0.000153505	0.000210257	0.000355579	0.000219048	0.00026401	0.00034769	0.000249391
264	0.00018114	0.000141919	0.000195137	0.000332941	0.000205507	0.000249485	0.00034113	0.000235324
265	0.00020085	0.000160263	0.000220528	0.000362978	0.000246927	0.000273295	0.00037393	0.000262681
266	0.00019975	0.000160263	0.00022224	0.000363088	0.000247724	0.000272846	0.00037393	0.000262835
267	0.0001795	0.000127438	0.000190573	0.000320794	0.00020949	0.000241548	0.00035425	0.000231942
268	0.00037406	0.000380865	0.000518369	0.000465676	0.00056634	0.0003901	0.00105619	0.000535943
269	0.00038226	0.000388589	0.000534915	0.000475063	0.000573509	0.000397738	0.00109556	0.000549662
270	0.00038062	0.000387623	0.000531207	0.000465455	0.000573509	0.000394293	0.00110212	0.000547832
271	0.00038527	0.00039052	0.000536627	0.000467553	0.000574305	0.000397738	0.0011218	0.000553402
272	0.00038527	0.00039052	0.000536627	0.000466449	0.000572712	0.000396989	0.0011218	0.00055291
273	0.000385	0.000391968	0.000538624	0.00046667	0.000572712	0.000395791	0.00113492	0.000555098
274	0.00038172	0.00039052	0.000534345	0.000455517	0.000567136	0.000387105	0.00112836	0.000549243
275	0.00043973	0.000429137	0.000584556	0.000487099	0.000602184	0.000413761	0.00118084	0.000591043
276	0.00044684	0.000435895	0.000591402	0.000490743	0.000602184	0.000416457	0.00119396	0.000596783
277	0.00044657	0.000435895	0.000590832	0.00048986	0.000602184	0.000415408	0.00119396	0.000596387
278	0.00044712	0.000435895	0.000590832	0.00048975	0.000602184	0.000415558	0.00119396	0.000596471
279	0.00044712	0.000435895	0.000590832	0.00048997	0.000602184	0.000415558	0.00119396	0.000596502
280	0.00044712	0.000435895	0.000590547	0.000489087	0.000602184	0.00041451	0.00119396	0.000596185
281	0.00044274	0.00043493	0.000588264	0.000483345	0.000602184	0.000409568	0.00119396	0.00059357
282	0.00044383	0.000434447	0.000588264	0.000483013	0.000602184	0.000408969	0.00119396	0.000593524
283	0.00043863	0.000433482	0.000585982	0.000477271	0.000596608	0.000404926	0.0011874	0.000589186
284	0.00043371	0.000430585	0.00057942	0.000460817	0.000589439	0.000394892	0.0011874	0.000582323
285	0.00043918	0.000431551	0.000579135	0.000462584	0.000589439	0.000397887	0.0011874	0.000583882
286	0.00043918	0.000431551	0.000578565	0.000461922	0.000588643	0.000397438	0.0011874	0.000583528
287	0.00042358	0.000426724	0.000561733	0.000437959	0.000573509	0.000377222	0.00118084	0.000568795
288	0.00039841	0.000405484	0.000532918	0.000400634	0.000555985	0.00035461	0.00112836	0.000539485
289	0.00039841	0.00040307	0.000532633	0.000407149	0.000552002	0.000359551	0.0011218	0.00053923
290	0.00038418	0.000392933	0.000512378	0.000396438	0.000536071	0.000350566	0.00109556	0.000524017
291	0.00032973	0.000339352	0.000437062	0.00033272	0.000457214	0.000296357	0.00082659	0.000431288
292	0.00037515	0.000360108	0.000498684	0.000442818	0.000516158	0.000459585	0.00077411	0.000489515
293	0.00037022	0.000358178	0.000494404	0.000445799	0.000512972	0.000465874	0.00076755	0.000487857
294	0.00036311	0.000348523	0.000484705	0.000439394	0.00050421	0.000465425	0.00075442	0.00047997
295	0.00022739	0.000211431	0.000315529	0.000343211	0.000332157	0.000376773	0.00022961	0.000290871
296	0.00034669	0.000277081	0.000430785	0.000579417	0.000516954	0.000655608	0.00028209	0.000441233
297	0.00033575	0.000254393	0.000401971	0.000570693	0.000509785	0.000646174	0.00022961	0.000421196
298	0.0003601	0.000268875	0.000411956	0.000623478	0.000540054	0.000695442	0.00023617	0.00044801
299	0.00035517	0.000250049	0.000394268	0.00061619	0.000514565	0.000689751	0.00018369	0.000429098
300	0.00036913	0.000238946	0.000395124	0.00062646	0.000502617	0.000706224	0.00015745	0.000427992
301	0.00146995	0.000790211	0.00134114	0.00143303	0.00158511	0.00173321	0.00136452	0.00138817
302	0.00191488	0.00100744	0.00167578	0.00174907	0.00196506	0.00212631	0.00169254	0.00173301
303	0.00207906	0.00108081	0.00178048	0.00184415	0.00204392	0.00222574	0.00175158	0.00182939
304	0.00211956	0.00109336	0.00180559	0.00186447	0.00205667	0.00224162	0.00174502	0.00184661
305	0.002142	0.00109722	0.00181786	0.00187253	0.00206463	0.0022512	0.0017647	0.00185859
306	0.00213379	0.00108467	0.00180245	0.00185939	0.00203516	0.00223967	0.00175158	0.00184381
307	0.00227006	0.00115949	0.00190658	0.0019272	0.00208853	0.0023135	0.00178438	0.00192139
308	0.00238416	0.00121838	0.00198133	0.00198672	0.00216261	0.00237774	0.00184342	0.00199348
309	0.00246762	0.00123914	0.00202526	0.00201388	0.00220004	0.00241009	0.0018631	0.0020313
310	0.00289613	0.00141099	0.00231426	0.00225406	0.00244617	0.00268712	0.00214519	0.0023077
311	0.00292814	0.00142113	0.00233537	0.00227394	0.00246449	0.00271273	0.00215831	0.00232773
312	0.00292759	0.00142161	0.00233309	0.0022735	0.00245653	0.00271363	0.00215831	0.00232632
313	0.00292267	0.00141775	0.00232738	0.0022661	0.00244299	0.00270839	0.00215831	0.00232051
314	0.00304936	0.00148436	0.00242837	0.00234075	0.00254654	0.00278461	0.00226983	0.00241483
315	0.00305264	0.00148678	0.00243208	0.00234296	0.00254733	0.00278596	0.00226983	0.0024168
316	0.00305319	0.00148678	0.00243237	0.00234097	0.00255052	0.00278566	0.00226983	0.00241705
317	0.00310026	0.00149981	0.00246061	0.00235853	0.00256645	0.00280288	0.00226983	0.00243691
318	0.00309971	0.00149788	0.00246061	0.00235864	0.00256566	0.00279974	0.0022764	0.00243695
319	0.00310327	0.00149788	0.00246204	0.00236206	0.00256645	0.00280408	0.0022764	0.00243888
320	0.00310327	0.00149788	0.00246204	0.00236361	0.00256725	0.00280363	0.0022764	0.00243915
321	0.00310327	0.00149643	0.0024609	0.00236294	0.00257043	0.00280393	0.00228296	0.00244012
322	0.00309752	0.00149064	0.0024512	0.00235864	0.00256804	0.00279989	0.00228296	0.00243555
323	0.00300503	0.00141823	0.0023522	0.00227228	0.00246609	0.00269536	0.00210583	0.00233072
324	0.00315006	0.0014834	0.00248458	0.00233832	0.00256486	0.00275781	0.00217799	0.00242243
325	0.00315334	0.00148581	0.00248714	0.00234075	0.00256884	0.00275871	0.00217799	0.00242465
326	0.00316073	0.00149208	0.00249513	0.00234163	0.00257442	0.00275961	0.00217799	0.0024288
327	0.00316155	0.0014916	0.00249656	0.00234141	0.00257442	0.00275901	0.00219111	0.00243081
328	0.00316319	0.00149112	0.00249884	0.00234053	0.00257521	0.00275856	0.00221079	0.00243403
329	0.00312297	0.00147616	0.00246575	0.00231193	0.00256486	0.00271782	0.00217143	0.00240442
330	0.00313063	0.00147953	0.00247316	0.00231667	0.00256566	0.00272172	0.00217799	0.00240934
331	0.00309123	0.00146264	0.00244321	0.00228664	0.00254893	0.00268233	0.00215175	0.00238096
332	0.00309944	0.00146505	0.00245234	0.00228874	0.0025561	0.00268712	0.00215175	0.00238579
333	0.00289667	0.00131348	0.00227432	0.00215733	0.00239838	0.00248496	0.00191558	0.00220582
334	0.00290215	0.00132072	0.00228202	0.00215943	0.00240316	0.00248841	0.0019287	0.00221208
335	0.00287259	0.00132024	0.0022669	0.00213336	0.00240316	0.0024613	0.0019287	0.00219804
336	0.00286028	0.00132168	0.0022689	0.00212663	0.00241033	0.00245471	0.00194182	0.00219776
337	0.00242329	0.00121404	0.00206834	0.00186867	0.0022327	0.00216465	0.00178438	0.00196515
338	0.00243834	0.00122031	0.00208688	0.00186745	0.00224067	0.00216659	0.00188278	0.00198615
339	0.0024356	0.0012208	0.00208432	0.00186039	0.00223828	0.0021606	0.00186966	0.00198138
340	0.00241782	0.00121549	0.00207347	0.00183675	0.00222155	0.00212811	0.0018631	0.00196518
341	0.00227963	0.00116287	0.00198475	0.001725	0.00213791	0.00199812	0.0018303	0.00187408
342	0.00225884	0.00115563	0.0019722	0.0017112	0.00212995	0.0019827	0.00182374	0.00186203
343	0.0021067	0.00108129	0.00185238	0.00155814	0.00199852	0.00181258	0.00177782	0.00174106
344	0.00206237	0.00106391	0.00182356	0.001528	0.00197621	0.00177919	0.00179094	0.00171774
345	0.00206209	0.0010644	0.00182328	0.00152756	0.00197462	0.00177859	0.00179094	0.00171735
346	0.00195127	0.00100068	0.00171658	0.00142419	0.00186948	0.00166014	0.00175158	0.00162484
347	0.00195045	0.00100068	0.00171601	0.00142331	0.00186868	0.00165849	0.00175158	0.00162417
348	0.00191926	0.000993919	0.00168776	0.00139603	0.00185833	0.00162764	0.00173846	0.00160306
349	0.00157448	0.000874687	0.00145155	0.00120036	0.00167273	0.00142458	0.00165973	0.0014083
350	0.0015649	0.000872756	0.00144185	0.00119682	0.00166716	0.00142038	0.00165973	0.00140337
351	0.00138075	0.000790694	0.00128323	0.00104476	0.00150546	0.0012332	0.00152853	0.00125237
352	0.00109836	0.000666635	0.00104301	0.000846212	0.00132305	0.00101606	0.00136452	0.00105112
353	0.00108495	0.000659877	0.00103902	0.000840359	0.0013111	0.00100588	0.00136452	0.00104367
354	0.00104363	0.000639603	0.0010025	0.000808887	0.00128004	0.000967988	0.00129892	0.00100594
355	0.00015378	6.99943e-05	0.000138365	0.000156698	0.000137005	0.000155591	0.00019681	0.000144034
356	0.00015925	7.86832e-05	0.000151488	0.00016752	0.000145767	0.000166373	0.00020337	0.000153207
357	0.00013408	7.53042e-05	0.0001338	0.00014963	0.000136208	0.000148852	0.00018369	0.000137366
358	4.296e-05	3.42731e-05	4.76431e-05	5.66497e-05	4.06235e-05	5.00167e-05	5.9042e-05	4.73155e-05
359	5.3906e-05	3.66867e-05	5.44901e-05	7.42078e-05	4.61993e-05	6.34943e-05	6.5602e-05	5.63694e-05
360	5.4453e-05	3.66867e-05	5.59165e-05	7.60851e-05	4.69959e-05	6.49918e-05	6.5602e-05	5.72473e-05
361	5.4453e-05	3.71694e-05	5.59165e-05	7.6306e-05	4.69959e-05	6.4842e-05	6.5602e-05	5.73264e-05
362	5.0896e-05	3.37903e-05	5.27783e-05	7.22201e-05	4.61993e-05	6.21465e-05	5.9042e-05	5.38675e-05
363	5.3085e-05	3.42731e-05	5.42048e-05	7.45391e-05	4.69959e-05	6.4243e-05	5.9042e-05	5.51975e-05
364	5.3085e-05	3.42731e-05	5.42048e-05	7.45391e-05	4.69959e-05	6.4243e-05	5.9042e-05	5.51975e-05
365	5.3085e-05	3.42731e-05	5.42048e-05	7.45391e-05	4.69959e-05	6.4243e-05	5.9042e-05	5.51975e-05
366	5.3085e-05	3.42731e-05	5.42048e-05	7.45391e-05	4.69959e-05	6.40933e-05	5.9042e-05	5.51761e-05
367	5.1717e-05	3.33076e-05	5.27783e-05	7.27723e-05	4.61993e-05	6.3045e-05	5.9042e-05	5.4123e-05
368	5.1717e-05	3.33076e-05	5.27783e-05	7.26618e-05	4.61993e-05	6.3045e-05	5.9042e-05	5.41072e-05
369	5.1717e-05	3.33076e-05	5.27783e-05	7.21097e-05	4.61993e-05	6.28953e-05	5.9042e-05	5.4007e-05
370	5.1717e-05	3.33076e-05	5.22077e-05	7.14471e-05	4.54028e-05	6.25958e-05	5.9042e-05	5.36742e-05
371	5.1169e-05	3.33076e-05	5.22077e-05	7.13367e-05	4.54028e-05	6.2446e-05	5.9042e-05	5.35589e-05
372	4.8159e-05	3.23422e-05	4.93549e-05	6.95698e-05	4.38097e-05	5.9451e-05	3.9361e-05	4.8864e-05
373	2.8184e-05	2.12396e-05	3.45199e-05	4.95823e-05	2.9472e-05	4.19302e-05	3.2801e-05	3.39613e-05
374	3.311e-05	2.60668e-05	3.99404e-05	5.8527e-05	3.42512e-05	5.21132e-05	3.9361e-05	4.04813e-05
375	3.3383e-05	2.60668e-05	3.99404e-05	5.86374e-05	3.42512e-05	5.24127e-05	3.9361e-05	4.0579e-05
376	3.4751e-05	2.65496e-05	4.05109e-05	5.99626e-05	3.50478e-05	5.3461e-05	4.5922e-05	4.23149e-05
377	2.8731e-05	1.78606e-05	3.30934e-05	5.17909e-05	3.26581e-05	4.83695e-05	3.9361e-05	3.59807e-05
378	6.1841e-05	3.33076e-05	7.38897e-05	8.73488e-05	7.40782e-05	8.82031e-05	6.5602e-05	6.91815e-05
379	6.4304e-05	3.52385e-05	7.8169e-05	9.18764e-05	7.48747e-05	9.23961e-05	6.5602e-05	7.17801e-05
380	6.4851e-05	3.66867e-05	7.98807e-05	9.28702e-05	7.64678e-05	9.26956e-05	6.5602e-05	7.2722e-05
381	6.4304e-05	3.66867e-05	7.84543e-05	9.18764e-05	7.56713e-05	9.14976e-05	6.5602e-05	7.20131e-05
382	8.8657e-05	4.00657e-05	8.67276e-05	0.000101484	8.28401e-05	0.000103927	6.5602e-05	8.1329e-05
383	9.1941e-05	4.34447e-05	8.87246e-05	0.000103913	8.52298e-05	0.000106473	6.5602e-05	8.36182e-05
384	9.2761e-05	4.44102e-05	8.90099e-05	0.000104355	8.60263e-05	0.000106772	6.5602e-05	8.41338e-05
385	9.2761e-05	4.44102e-05	9.04364e-05	0.000104796	8.68228e-05	0.000107221	6.5602e-05	8.45787e-05
386	9.2761e-05	4.44102e-05	9.07217e-05	0.000104796	8.60263e-05	0.000107221	6.5602e-05	8.45057e-05
387	9.2761e-05	4.39274e-05	9.07217e-05	0.000104796	8.60263e-05	0.000107221	6.5602e-05	8.44367e-05
388	9.2761e-05	4.39274e-05	9.01511e-05	0.000104576	8.60263e-05	0.000106772	6.5602e-05	8.42595e-05
389	9.2214e-05	4.39274e-05	8.98658e-05	0.000103913	8.68228e-05	0.000105275	6.5602e-05	8.39457e-05
390	9.2214e-05	4.39274e-05	9.01511e-05	0.000103692	8.84159e-05	0.000104975	6.5602e-05	8.41397e-05
391	9.1393e-05	4.39274e-05	8.92952e-05	0.000103692	8.84159e-05	0.000104376	6.5602e-05	8.38146e-05
392	8.811e-05	4.44102e-05	8.72982e-05	9.94959e-05	8.68228e-05	0.00010228	6.5602e-05	8.20027e-05
393	9.0025e-05	4.92374e-05	8.70129e-05	9.65143e-05	8.68228e-05	0.000101082	5.2482e-05	8.04537e-05
394	0.00010644	6.90288e-05	9.92803e-05	0.000102257	9.08055e-05	0.00010827	5.2482e-05	8.97951e-05
395	0.00011575	8.2545e-05	0.000108124	0.000106674	9.31952e-05	0.000112612	5.2482e-05	9.59113e-05
396	0.00011794	8.54413e-05	0.000110407	0.000106784	9.08055e-05	0.000111564	5.2482e-05	9.64884e-05
397	0.00010234	8.35104e-05	9.24334e-05	9.01095e-05	7.16886e-05	9.05991e-05	2.6241e-05	7.95601e-05
398	0.00010644	8.49586e-05	9.35745e-05	9.22076e-05	6.9299e-05	9.22464e-05	1.9681e-05	7.97728e-05
399	0.00010644	8.49586e-05	9.32893e-05	9.20972e-05	6.9299e-05	9.20966e-05	1.9681e-05	7.96949e-05
400	0.00010644	8.49586e-05	9.32893e-05	9.20972e-05	6.9299e-05	9.19469e-05	1.9681e-05	7.96735e-05
401	0.0001059	8.54413e-05	9.3004e-05	9.19868e-05	6.85024e-05	9.19469e-05	1.9681e-05	7.9494e-05
402	0.00010261	8.35104e-05	9.04364e-05	8.95574e-05	6.85024e-05	9.02996e-05	1.9681e-05	7.77999e-05
403	9.5771e-05	8.10968e-05	8.67276e-05	8.35942e-05	6.61128e-05	8.59569e-05	1.312e-05	7.31972e-05
404	9.5771e-05	8.10968e-05	8.67276e-05	8.34838e-05	6.61128e-05	8.62564e-05	6.5602e-06	7.2287e-05
405	9.5771e-05	8.10968e-05	8.64423e-05	8.34838e-05	6.61128e-05	8.62564e-05	6.5602e-06	7.22462e-05
406	9.5771e-05	8.10968e-05	8.64423e-05	8.34838e-05	6.61128e-05	8.62564e-05	6.5602e-06	7.22462e-05
407	9.495e-05	8.01314e-05	8.64423e-05	8.29317e-05	6.53163e-05	8.55076e-05	6.5602e-06	7.16914e-05
408	9.495e-05	8.01314e-05	8.64423e-05	8.29317e-05	6.53163e-05	8.53579e-05	6.5602e-06	7.167e-05
409	9.495e-05	8.01314e-05	8.64423e-05	8.28212e-05	6.53163e-05	8.52081e-05	6.5602e-06	7.16329e-05
410	9.4677e-05	8.01314e-05	8.64423e-05	8.27108e-05	6.53163e-05	8.52081e-05	6.5602e-06	7.1578e-05
411	9.2761e-05	7.96487e-05	8.53012e-05	7.89562e-05	6.21301e-05	8.20633e-05	6.5602e-06	6.96316e-05
412	9.2761e-05	7.96487e-05	8.53012e-05	7.89562e-05	6.21301e-05	8.20633e-05	6.5602e-06	6.96316e-05
413	9.0846e-05	7.67523e-05	8.35895e-05	7.64164e-05	5.89439e-05	7.89186e-05	6.5602e-06	6.74324e-05
414	9.0572e-05	7.62696e-05	8.30189e-05	7.54225e-05	5.81474e-05	7.78703e-05	6.5602e-06	6.68373e-05
415	8.8383e-05	7.28906e-05	7.84543e-05	7.26618e-05	5.49612e-05	7.39768e-05	6.5602e-06	6.3984e-05
416	8.2363e-05	7.0477e-05	7.44602e-05	7.06741e-05	5.33682e-05	7.15808e-05	6.5602e-06	6.13548e-05
417	2.4627e-06	2.4136e-06	3.42346e-06	5.74227e-06	5.57578e-06	5.09152e-06	6.5602e-06	4.46708e-06
418	2.4627e-06	2.4136e-06	3.70875e-06	5.63184e-06	4.77924e-06	5.09152e-06	0	3.44109e-06
419	2.1891e-06	2.4136e-06	3.13817e-06	5.52142e-06	3.9827e-06	5.09152e-06	0	3.19092e-06
420	1.3682e-06	1.44816e-06	2.56759e-06	2.76071e-06	1.59308e-06	2.84526e-06	0	1.79757e-06
421	1.3682e-06	9.65438e-07	2.56759e-06	2.76071e-06	7.9654e-07	2.99501e-06	0	1.63621e-06
422	1.0945e-06	9.65438e-07	1.71173e-06	1.76685e-06	7.9654e-07	2.39601e-06	0	1.2473e-06
423	1.0945e-06	9.65438e-07	1.99702e-06	1.76685e-06	7.9654e-07	2.54576e-06	0	1.30945e-06
424	1.0945e-06	4.82719e-07	1.99702e-06	1.76685e-06	7.9654e-07	2.54576e-06	0	1.24049e-06
425	1.0945e-06	4.82719e-07	1.99702e-06	1.65642e-06	1.59308e-06	1.94676e-06	0	1.25293e-06
426	8.209e-07	4.82719e-07	1.99702e-06	1.65642e-06	1.59308e-06	1.94676e-06	0	1.21384e-06
427	5.4726e-07	9.65438e-07	1.71173e-06	8.83426e-07	1.59308e-06	8.98504e-07	0	9.42778e-07
428	8.209e-07	2.4136e-06	3.42346e-06	1.87728e-06	3.18616e-06	2.09651e-06	6.5602e-06	2.91116e-06
429	8.209e-07	2.4136e-06	3.42346e-06	1.87728e-06	3.18616e-06	2.09651e-06	6.5602e-06	2.91116e-06
430	8.209e-07	2.4136e-06	3.42346e-06	2.20857e-06	3.9827e-06	2.39601e-06	6.5602e-06	3.11506e-06
431	8.209e-07	2.4136e-06	3.42346e-06	2.20857e-06	3.9827e-06	2.39601e-06	6.5602e-06	3.11506e-06
432	8.209e-07	2.4136e-06	2.85288e-06	2.09814e-06	3.18616e-06	2.24626e-06	6.5602e-06	2.88259e-06
433	8.209e-07	6.27535e-06	4.56461e-06	2.76071e-06	6.37232e-06	3.14476e-06	6.5602e-06	4.35698e-06
434	8.209e-07	6.27535e-06	4.56461e-06	2.87114e-06	6.37232e-06	3.14476e-06	6.5602e-06	4.37276e-06
435	1.3682e-06	1.06198e-05	9.98509e-06	5.63184e-06	1.11516e-05	6.28953e-06	6.5602e-06	7.37232e-06
436	1.3682e-06	1.2068e-05	9.98509e-06	5.8527e-06	1.11516e-05	6.73878e-06	6.5602e-06	7.67493e-06
437	1.3134e-05	4.44102e-05	2.99553e-05	1.91041e-05	3.74374e-05	1.99168e-05	1.312e-05	2.52969e-05
438	1.3955e-05	4.73065e-05	3.28081e-05	2.0871e-05	4.14201e-05	2.18636e-05	1.312e-05	2.7335e-05
439	1.3955e-05	4.82719e-05	3.22376e-05	2.09814e-05	4.14201e-05	2.20133e-05	1.312e-05	2.74286e-05
440	2.4901e-05	9.55784e-05	5.53459e-05	4.66007e-05	7.88574e-05	4.53744e-05	5.2482e-05	5.70199e-05
441	2.5174e-05	9.70265e-05	5.62018e-05	4.89197e-05	7.9654e-05	4.71715e-05	5.2482e-05	5.80899e-05
442	3.0647e-05	0.000106681	5.90547e-05	5.55454e-05	8.68228e-05	5.18137e-05	5.9042e-05	6.42295e-05
443	3.092e-05	0.000108612	5.934e-05	5.66497e-05	8.68228e-05	5.25625e-05	5.9042e-05	6.48499e-05
444	3.092e-05	0.000108612	5.934e-05	5.66497e-05	8.68228e-05	5.2862e-05	5.9042e-05	6.48927e-05
445	3.092e-05	0.000108612	5.934e-05	5.66497e-05	8.76194e-05	5.2862e-05	5.9042e-05	6.50065e-05
446	3.3657e-05	0.000109095	6.04811e-05	6.50423e-05	9.0009e-05	5.7055e-05	7.2162e-05	6.9643e-05
447	3.3657e-05	0.000109095	6.04811e-05	6.51527e-05	9.0009e-05	5.7055e-05	7.2162e-05	6.96588e-05
448	3.3657e-05	0.000109095	6.04811e-05	6.51527e-05	9.0009e-05	5.7055e-05	7.2162e-05	6.96588e-05
449	3.393e-05	0.00011006	6.04811e-05	6.51527e-05	9.0009e-05	5.69052e-05	7.2162e-05	6.98144e-05
450	4.597e-05	0.00012068	7.10368e-05	8.03918e-05	9.95675e-05	7.00833e-05	9.8403e-05	8.37332e-05
451	4.597e-05	0.00012068	7.10368e-05	8.05022e-05	9.95675e-05	7.05325e-05	9.8403e-05	8.38132e-05
452	4.6244e-05	0.00012068	7.10368e-05	8.07231e-05	0.000101161	7.12813e-05	9.8403e-05	8.42184e-05
453	4.6244e-05	0.00012068	7.10368e-05	8.08335e-05	0.000101161	7.14311e-05	9.8403e-05	8.42555e-05
454	4.6518e-05	0.00012068	7.04662e-05	8.11648e-05	0.000101161	7.18803e-05	9.8403e-05	8.43246e-05
455	4.6518e-05	0.00012068	7.04662e-05	8.11648e-05	0.000101161	7.18803e-05	9.8403e-05	8.43246e-05
456	4.2413e-05	0.000111991	6.16223e-05	7.82937e-05	9.39917e-05	6.81365e-05	9.8403e-05	7.92645e-05
457	3.6119e-05	8.97858e-05	4.93549e-05	6.97907e-05	7.56713e-05	5.79535e-05	9.8403e-05	6.81541e-05
458	3.9677e-05	9.31648e-05	5.07813e-05	8.02814e-05	7.80609e-05	6.64893e-05	0.00010496	7.33454e-05
459	3.9403e-05	9.26821e-05	5.07813e-05	8.0171e-05	7.80609e-05	6.63395e-05	0.00010496	7.32002e-05
460	3.8856e-05	9.12339e-05	4.99254e-05	8.0171e-05	7.80609e-05	6.63395e-05	0.00010496	7.27929e-05
461	3.8856e-05	8.9303e-05	4.87843e-05	7.98397e-05	7.72644e-05	6.604e-05	0.00010496	7.21501e-05
462	2.5995e-05	6.1788e-05	3.3664e-05	6.49318e-05	6.0537e-05	5.406e-05	9.8403e-05	5.70542e-05
463	2.6542e-05	6.7098e-05	3.59463e-05	6.9349e-05	6.21301e-05	6.09485e-05	9.8403e-05	6.00596e-05
464	2.6542e-05	6.66152e-05	3.59463e-05	7.00115e-05	6.13336e-05	6.1248e-05	9.8403e-05	6.00143e-05
465	2.5721e-05	6.61325e-05	3.50905e-05	6.94594e-05	5.97405e-05	6.09485e-05	9.8403e-05	5.93566e-05
466	2.408e-05	6.27535e-05	3.28081e-05	6.703e-05	5.73509e-05	5.85525e-05	7.8723e-05	5.4471e-05
467	2.2438e-05	6.03399e-05	3.10964e-05	6.37171e-05	5.25716e-05	5.63062e-05	7.2162e-05	5.12331e-05
468	2.3259e-05	5.88917e-05	3.10964e-05	6.40484e-05	5.25716e-05	5.66057e-05	7.2162e-05	5.12336e-05
469	1.8607e-05	4.15138e-05	2.0826e-05	4.8478e-05	3.10651e-05	4.16307e-05	3.9361e-05	3.44974e-05
470	1.9702e-05	4.2962e-05	2.22525e-05	5.12387e-05	3.42512e-05	4.35774e-05	3.9361e-05	3.61921e-05
471	1.9975e-05	4.2962e-05	2.19672e-05	5.12387e-05	3.42512e-05	4.35774e-05	3.9361e-05	3.61904e-05
472	1.9154e-05	4.05484e-05	2.0826e-05	5.03553e-05	3.26581e-05	4.19302e-05	3.9361e-05	3.49762e-05
473	9.3035e-06	2.02742e-05	1.16968e-05	3.44536e-05	1.43377e-05	2.72546e-05	6.5602e-06	1.76972e-05
474	2.408e-05	2.31705e-05	1.91143e-05	4.41713e-05	1.99135e-05	3.60899e-05	6.5602e-06	2.47285e-05
475	2.4627e-05	2.31705e-05	1.93996e-05	4.43922e-05	1.99135e-05	3.60899e-05	6.5602e-06	2.4879e-05
476	2.4901e-05	2.22051e-05	1.8829e-05	4.33983e-05	1.9117e-05	3.48919e-05	6.5602e-06	2.42717e-05
477	2.4901e-05	2.17224e-05	1.8829e-05	4.31775e-05	1.99135e-05	3.45924e-05	6.5602e-06	2.42422e-05
478	2.4627e-05	2.17224e-05	1.91143e-05	4.4613e-05	1.99135e-05	3.50416e-05	6.5602e-06	2.45131e-05
479	2.4627e-05	2.17224e-05	1.91143e-05	4.42818e-05	1.83204e-05	3.56407e-05	6.5602e-06	2.43238e-05
480	2.4627e-05	2.17224e-05	1.91143e-05	4.43922e-05	1.75239e-05	3.56407e-05	6.5602e-06	2.42258e-05
481	2.4627e-05	2.17224e-05	1.91143e-05	4.43922e-05	1.75239e-05	3.53411e-05	6.5602e-06	2.4183e-05
482	2.4353e-05	2.02742e-05	1.79732e-05	4.19628e-05	1.67273e-05	3.24959e-05	6.5602e-06	2.29067e-05
483	2.408e-05	1.97915e-05	1.82584e-05	4.0748e-05	1.67273e-05	3.03994e-05	6.5602e-06	2.23664e-05
484	2.3806e-05	1.93088e-05	1.76879e-05	3.96438e-05	1.75239e-05	2.89019e-05	6.5602e-06	2.19189e-05
485	2.3532e-05	1.93088e-05	1.6832e-05	3.74352e-05	1.59308e-05	2.74044e-05	6.5602e-06	2.10005e-05
486	2.2438e-05	1.78606e-05	1.56909e-05	3.48953e-05	1.59308e-05	2.44094e-05	6.5602e-06	1.96836e-05
487	1.8881e-05	1.25507e-05	1.25527e-05	2.39629e-05	1.27446e-05	1.75208e-05	1.312e-05	1.59047e-05
488	2.0249e-05	1.93088e-05	1.6832e-05	2.73862e-05	1.67273e-05	2.08153e-05	3.2801e-05	2.20171e-05
489	1.9975e-05	1.93088e-05	1.6832e-05	2.71654e-05	1.67273e-05	2.06656e-05	3.2801e-05	2.1925e-05
490	1.9975e-05	2.02742e-05	1.6832e-05	2.74966e-05	1.67273e-05	2.09651e-05	3.2801e-05	2.21531e-05
491	1.9975e-05	2.02742e-05	1.6832e-05	2.72758e-05	1.67273e-05	2.06656e-05	3.2801e-05	2.20787e-05
492	1.9975e-05	1.8826e-05	1.6832e-05	2.70549e-05	1.67273e-05	2.05158e-05	3.2801e-05	2.18189e-05
493	3.8309e-06	1.2068e-05	9.41451e-06	1.3914e-05	9.55848e-06	9.58404e-06	3.2801e-05	1.30244e-05
494	4.1045e-06	1.25507e-05	9.6998e-06	1.44661e-05	1.19481e-05	9.88354e-06	3.9361e-05	1.45734e-05
495	4.1045e-06	1.25507e-05	9.6998e-06	1.42453e-05	1.11516e-05	9.88354e-06	3.9361e-05	1.44281e-05
496	4.1045e-06	1.2068e-05	8.55865e-06	1.33618e-05	8.76194e-06	9.43429e-06	3.9361e-05	1.36644e-05
497	6.5672e-06	1.44816e-05	1.22674e-05	1.9325e-05	1.19481e-05	1.49751e-05	3.9361e-05	1.69894e-05
498	6.5672e-06	1.44816e-05	1.22674e-05	1.9325e-05	1.19481e-05	1.49751e-05	3.9361e-05	1.69894e-05
499	6.5672e-06	1.49643e-05	1.25527e-05	1.91041e-05	1.27446e-05	1.48253e-05	4.5922e-05	1.80971e-05
500	6.5672e-06	1.49643e-05	1.25527e-05	1.89937e-05	1.27446e-05	1.46756e-05	4.5922e-05	1.80599e-05
501	6.5672e-06	1.49643e-05	1.25527e-05	1.89937e-05	1.27446e-05	1.48253e-05	4.5922e-05	1.80813e-05
502	6.5672e-06	1.49643e-05	1.25527e-05	1.89937e-05	1.27446e-05	1.48253e-05	4.5922e-05	1.80813e-05
503	6.2935e-06	1.49643e-05	1.25527e-05	1.84415e-05	1.27446e-05	1.46756e-05	4.5922e-05	1.7942e-05
504	6.2935e-06	1.44816e-05	1.19821e-05	1.78894e-05	1.27446e-05	1.39268e-05	4.5922e-05	1.76057e-05
505	6.2935e-06	1.44816e-05	1.16968e-05	1.75581e-05	1.27446e-05	1.39268e-05	4.5922e-05	1.75176e-05
506	4.6518e-06	1.30334e-05	1.02704e-05	1.28097e-05	1.19481e-05	1.15308e-05	4.5922e-05	1.57379e-05
507	4.9254e-06	1.30334e-05	1.02704e-05	1.29201e-05	1.27446e-05	1.19801e-05	4.5922e-05	1.59708e-05
508	4.9254e-06	1.30334e-05	1.02704e-05	1.28097e-05	1.27446e-05	1.19801e-05	4.5922e-05	1.5955e-05
509	4.9254e-06	1.30334e-05	9.98509e-06	1.28097e-05	1.27446e-05	1.18303e-05	4.5922e-05	1.58929e-05
510	3.2836e-06	7.24079e-06	5.42048e-06	8.83426e-06	8.76194e-06	7.93678e-06	2.6241e-05	9.6741e-06
511	4.3781e-06	7.72351e-06	5.70576e-06	9.49683e-06	8.76194e-06	8.53579e-06	2.6241e-05	1.01204e-05
512	4.6518e-06	7.72351e-06	5.42048e-06	9.49683e-06	8.76194e-06	8.53579e-06	2.6241e-05	1.01187e-05
513	4.6518e-06	7.72351e-06	5.42048e-06	9.49683e-06	8.76194e-06	8.53579e-06	2.6241e-05	1.01187e-05
514	4.6518e-06	7.24079e-06	5.13519e-06	8.72384e-06	7.16886e-06	8.23628e-06	1.9681e-05	8.69105e-06
515	4.9254e-06	7.72351e-06	5.70576e-06	1.17054e-05	8.76194e-06	1.1381e-05	1.9681e-05	9.98338e-06
516	5.199e-06	7.24079e-06	5.42048e-06	1.11533e-05	8.76194e-06	1.12313e-05	1.9681e-05	9.81249e-06
517	4.1045e-06	7.24079e-06	4.8499e-06	1.11533e-05	7.9654e-06	1.18303e-05	2.6241e-05	1.04836e-05
518	4.3781e-06	7.24079e-06	4.8499e-06	1.12637e-05	7.9654e-06	1.18303e-05	2.6241e-05	1.05384e-05
519	4.3781e-06	7.24079e-06	4.8499e-06	1.12637e-05	7.9654e-06	1.18303e-05	2.6241e-05	1.05384e-05
520	4.3781e-06	7.24079e-06	4.8499e-06	1.12637e-05	7.9654e-06	1.18303e-05	1.9681e-05	9.60126e-06
521	4.3781e-06	7.24079e-06	4.8499e-06	1.12637e-05	7.9654e-06	1.16805e-05	1.9681e-05	9.57987e-06
522	3.8309e-06	5.30991e-06	2.85288e-06	9.38641e-06	4.77924e-06	9.88354e-06	1.312e-05	7.02332e-06
523	3.8309e-06	5.30991e-06	3.13817e-06	9.71769e-06	5.57578e-06	1.0183e-05	1.312e-05	7.26798e-06
524	3.8309e-06	5.30991e-06	3.13817e-06	9.71769e-06	5.57578e-06	1.00333e-05	1.312e-05	7.24659e-06
525	3.8309e-06	4.82719e-06	3.13817e-06	9.38641e-06	4.77924e-06	9.88354e-06	1.312e-05	6.99512e-06
526	3.01e-06	2.89631e-06	2.28231e-06	7.28827e-06	3.9827e-06	6.13978e-06	6.5602e-06	4.59422e-06
527	3.01e-06	3.37903e-06	2.56759e-06	7.72998e-06	3.9827e-06	6.28953e-06	6.5602e-06	4.78843e-06
528	2.7363e-06	1.93088e-06	1.99702e-06	6.29441e-06	3.18616e-06	5.09152e-06	6.5602e-06	3.97093e-06
529	3.8309e-06	3.37903e-06	1.99702e-06	7.61955e-06	5.57578e-06	6.28953e-06	1.312e-05	5.97317e-06
530	3.8309e-06	3.37903e-06	1.99702e-06	7.61955e-06	5.57578e-06	6.58903e-06	1.312e-05	6.01596e-06
531	3.8309e-06	3.37903e-06	1.99702e-06	7.17784e-06	5.57578e-06	6.58903e-06	1.312e-05	5.95286e-06
532	3.2836e-06	3.86175e-06	2.28231e-06	7.50912e-06	7.16886e-06	7.18803e-06	1.9681e-05	7.28204e-06
533	3.2836e-06	6.27535e-06	3.13817e-06	8.94469e-06	8.76194e-06	9.73379e-06	2.6241e-05	9.48263e-06
534	3.01e-06	6.27535e-06	3.13817e-06	8.83426e-06	8.76194e-06	9.58404e-06	2.6241e-05	9.40637e-06
535	3.01e-06	5.79263e-06	3.13817e-06	9.16555e-06	8.76194e-06	9.73379e-06	2.6241e-05	9.40613e-06
536	3.2836e-06	5.79263e-06	3.99404e-06	9.05512e-06	8.76194e-06	9.73379e-06	2.6241e-05	9.55171e-06
537	3.2836e-06	6.27535e-06	4.56461e-06	9.05512e-06	8.76194e-06	9.88354e-06	2.6241e-05	9.72357e-06
538	3.5572e-06	7.72351e-06	4.56461e-06	8.83426e-06	8.76194e-06	1.00333e-05	2.6241e-05	9.95939e-06
539	3.5572e-06	7.72351e-06	4.56461e-06	8.06127e-06	8.76194e-06	8.98504e-06	2.6241e-05	9.69921e-06
540	3.5572e-06	7.72351e-06	4.56461e-06	6.84656e-06	7.9654e-06	7.78703e-06	2.6241e-05	9.24074e-06
541	4.9254e-06	1.01371e-05	8.27336e-06	1.11533e-05	1.51343e-05	1.24293e-05	3.9361e-05	1.44877e-05
542	4.9254e-06	1.01371e-05	8.27336e-06	1.11533e-05	1.51343e-05	1.24293e-05	3.9361e-05	1.44877e-05
543	4.9254e-06	1.01371e-05	8.27336e-06	1.11533e-05	1.51343e-05	1.22796e-05	3.9361e-05	1.44663e-05
544	4.9254e-06	1.01371e-05	7.98807e-06	9.93855e-06	1.43377e-05	1.18303e-05	3.9361e-05	1.40741e-05
545	1.2587e-05	3.42731e-05	2.62465e-05	2.31899e-05	2.54893e-05	2.51581e-05	4.5922e-05	2.75522e-05
546	1.2587e-05	3.52385e-05	2.62465e-05	2.33004e-05	2.54893e-05	2.53079e-05	4.5922e-05	2.77273e-05
547	1.2587e-05	3.52385e-05	2.62465e-05	2.34108e-05	2.54893e-05	2.53079e-05	4.5922e-05	2.77431e-05
548	1.2587e-05	3.52385e-05	2.62465e-05	2.34108e-05	2.54893e-05	2.53079e-05	4.5922e-05	2.77431e-05
549	1.2313e-05	3.52385e-05	2.62465e-05	2.30795e-05	2.54893e-05	2.45591e-05	3.9361e-05	2.66125e-05
550	1.204e-05	3.47558e-05	2.59612e-05	2.27482e-05	2.54893e-05	2.41099e-05	3.9361e-05	2.63522e-05
551	1.204e-05	3.52385e-05	2.65318e-05	2.34108e-05	2.54893e-05	2.45591e-05	3.9361e-05	2.66615e-05
552	1.204e-05	3.52385e-05	2.65318e-05	2.34108e-05	2.54893e-05	2.45591e-05	3.9361e-05	2.66615e-05
553	1.204e-05	3.52385e-05	2.62465e-05	2.33004e-05	2.54893e-05	2.42596e-05	3.9361e-05	2.65622e-05
554	1.204e-05	3.52385e-05	2.62465e-05	2.33004e-05	2.54893e-05	2.42596e-05	3.9361e-05	2.65622e-05
555	1.204e-05	3.52385e-05	2.62465e-05	2.33004e-05	2.54893e-05	2.39601e-05	3.9361e-05	2.65194e-05
556	1.204e-05	3.52385e-05	2.62465e-05	2.33004e-05	2.54893e-05	2.39601e-05	3.9361e-05	2.65194e-05
557	1.204e-05	3.52385e-05	2.62465e-05	2.31899e-05	2.54893e-05	2.39601e-05	3.9361e-05	2.65036e-05
558	1.204e-05	3.52385e-05	2.51054e-05	2.24169e-05	2.54893e-05	2.30616e-05	3.9361e-05	2.61018e-05
559	1.1493e-05	3.47558e-05	2.48201e-05	2.19752e-05	2.46927e-05	2.27621e-05	3.9361e-05	2.56943e-05
560	1.0398e-05	3.13767e-05	2.36789e-05	1.8552e-05	2.15066e-05	1.84193e-05	3.9361e-05	2.33276e-05
561	1.0398e-05	3.13767e-05	2.36789e-05	1.86624e-05	2.15066e-05	1.84193e-05	3.9361e-05	2.33433e-05
562	1.0398e-05	3.13767e-05	2.36789e-05	1.86624e-05	2.15066e-05	1.82696e-05	3.9361e-05	2.33219e-05
563	1.0398e-05	3.13767e-05	2.33936e-05	1.86624e-05	2.15066e-05	1.82696e-05	3.9361e-05	2.32812e-05
564	9.5771e-06	2.84804e-05	2.16819e-05	1.7006e-05	1.9117e-05	1.73711e-05	3.9361e-05	2.17993e-05
565	4.9254e-06	8.20623e-06	8.84394e-06	8.06127e-06	1.0355e-05	7.03828e-06	6.5602e-06	7.7129e-06
566	4.6518e-06	8.20623e-06	8.84394e-06	8.06127e-06	1.0355e-05	7.03828e-06	0	6.73664e-06
567	4.1045e-06	6.75807e-06	7.13221e-06	6.73613e-06	8.76194e-06	6.58903e-06	0	5.72598e-06
568	1.0945e-06	1.93088e-06	2.28231e-06	9.93855e-07	2.38962e-06	1.79701e-06	0	1.49831e-06
569	8.209e-07	1.93088e-06	2.56759e-06	9.93855e-07	1.59308e-06	1.79701e-06	0	1.38619e-06
570	8.209e-07	4.82719e-07	1.14115e-06	2.20857e-07	7.9654e-07	7.48753e-07	0	6.0156e-07
571	8.209e-07	0	1.14115e-06	5.52142e-07	1.59308e-06	1.04825e-06	0	7.36504e-07
572	1.0945e-06	0	1.14115e-06	8.83426e-07	7.9654e-07	8.98504e-07	0	6.87736e-07
573	1.9154e-06	4.82719e-07	1.71173e-06	4.52756e-06	2.38962e-06	3.59402e-06	6.5602e-06	3.0259e-06
574	1.9154e-06	4.82719e-07	1.71173e-06	4.96927e-06	2.38962e-06	4.49252e-06	6.5602e-06	3.21736e-06
575	1.3682e-06	4.82719e-07	1.71173e-06	4.96927e-06	2.38962e-06	4.79202e-06	6.5602e-06	3.18196e-06
576	1.6418e-06	4.82719e-07	1.71173e-06	6.07356e-06	3.18616e-06	5.24127e-06	6.5602e-06	3.55678e-06
577	1.6418e-06	4.82719e-07	1.71173e-06	5.96313e-06	3.18616e-06	5.24127e-06	6.5602e-06	3.541e-06
578	1.9154e-06	3.37903e-06	3.13817e-06	7.72998e-06	6.37232e-06	7.78703e-06	6.5602e-06	5.26888e-06
579	1.9154e-06	3.37903e-06	3.13817e-06	7.72998e-06	7.16886e-06	7.78703e-06	6.5602e-06	5.38267e-06
580	1.6418e-06	3.37903e-06	3.13817e-06	7.84041e-06	7.16886e-06	7.63728e-06	6.5602e-06	5.33797e-06
581	3.5572e-06	7.24079e-06	6.84692e-06	1.78894e-05	1.35412e-05	2.03661e-05	6.5602e-06	1.08574e-05
582	3.5572e-06	7.24079e-06	6.84692e-06	1.78894e-05	1.35412e-05	2.05158e-05	6.5602e-06	1.08788e-05
583	3.5572e-06	7.24079e-06	7.13221e-06	1.79998e-05	1.35412e-05	2.05158e-05	6.5602e-06	1.09353e-05
584	4.1045e-06	1.5447e-05	1.05557e-05	2.40734e-05	1.9117e-05	2.92014e-05	6.5602e-06	1.55799e-05
585	4.1045e-06	1.5447e-05	1.05557e-05	2.44047e-05	1.9117e-05	2.93511e-05	6.5602e-06	1.56486e-05
586	4.1045e-06	1.5447e-05	1.05557e-05	2.45151e-05	1.9117e-05	2.93511e-05	6.5602e-06	1.56644e-05
587	4.1045e-06	1.5447e-05	1.0841e-05	2.48464e-05	1.9117e-05	2.99501e-05	6.5602e-06	1.5838e-05
588	4.1045e-06	1.64125e-05	1.14115e-05	2.55089e-05	1.99135e-05	3.00999e-05	6.5602e-06	1.62873e-05
589	4.1045e-06	1.64125e-05	1.16968e-05	2.55089e-05	1.99135e-05	3.00999e-05	6.5602e-06	1.6328e-05
590	4.1045e-06	1.64125e-05	1.25527e-05	2.56194e-05	2.071e-05	3.02496e-05	6.5602e-06	1.66013e-05
591	4.1045e-06	1.64125e-05	1.2838e-05	2.56194e-05	2.071e-05	3.00999e-05	6.5602e-06	1.66206e-05
592	6.2935e-06	4.2962e-05	3.05258e-05	4.72633e-05	4.93855e-05	5.39102e-05	1.312e-05	3.47801e-05
593	6.5672e-06	4.58583e-05	3.33787e-05	5.02449e-05	5.49612e-05	5.67555e-05	1.312e-05	3.72695e-05
594	7.9353e-06	5.503e-05	3.93698e-05	5.48829e-05	6.21301e-05	6.03495e-05	1.312e-05	4.18311e-05
595	1.204e-05	6.61325e-05	4.6502e-05	6.81343e-05	7.24851e-05	7.54743e-05	1.9681e-05	5.14927e-05
596	1.2587e-05	6.80634e-05	4.70726e-05	7.03428e-05	7.40782e-05	7.68221e-05	1.9681e-05	5.26638e-05
597	1.4776e-05	7.09597e-05	4.96402e-05	7.9398e-05	7.88574e-05	8.59569e-05	1.9681e-05	5.70384e-05
598	1.4776e-05	7.0477e-05	4.87843e-05	7.89562e-05	7.80609e-05	8.47589e-05	1.9681e-05	5.64992e-05
599	1.4776e-05	7.0477e-05	4.87843e-05	7.9398e-05	7.80609e-05	8.44594e-05	1.9681e-05	5.65195e-05
600	1.3682e-05	6.7098e-05	4.59314e-05	7.19993e-05	7.24851e-05	7.54743e-05	1.9681e-05	5.23358e-05
601	1.3955e-05	6.80634e-05	4.59314e-05	7.34348e-05	7.24851e-05	7.60733e-05	1.9681e-05	5.28034e-05
602	1.3955e-05	6.80634e-05	4.59314e-05	7.35453e-05	7.24851e-05	7.59236e-05	1.9681e-05	5.27978e-05
603	1.3134e-05	6.56498e-05	4.39344e-05	7.21097e-05	7.0892e-05	7.47256e-05	1.9681e-05	5.14466e-05
604	1.6418e-05	6.7098e-05	4.76431e-05	7.96188e-05	7.16886e-05	8.41599e-05	1.9681e-05	5.51867e-05
605	1.6418e-05	6.7098e-05	4.76431e-05	7.97292e-05	7.16886e-05	8.47589e-05	1.9681e-05	5.52881e-05
606	1.6144e-05	6.66152e-05	4.76431e-05	7.95084e-05	7.16886e-05	8.47589e-05	1.9681e-05	5.51485e-05
607	1.6144e-05	6.66152e-05	4.76431e-05	7.9398e-05	7.16886e-05	8.49086e-05	1.9681e-05	5.51541e-05
608	1.6144e-05	6.61325e-05	4.76431e-05	7.88458e-05	7.16886e-05	8.43096e-05	1.9681e-05	5.49207e-05
609	1.6144e-05	6.56498e-05	4.73578e-05	7.85145e-05	7.24851e-05	8.38604e-05	1.9681e-05	5.48132e-05
610	1.5871e-05	6.1788e-05	4.27932e-05	7.36557e-05	6.69093e-05	7.78703e-05	1.312e-05	5.02868e-05
611	1.7239e-05	6.37189e-05	4.59314e-05	7.90667e-05	7.32817e-05	8.37106e-05	1.312e-05	5.37241e-05
612	1.7786e-05	6.37189e-05	4.59314e-05	7.89562e-05	7.32817e-05	8.38604e-05	1.312e-05	5.38079e-05
613	1.7512e-05	6.37189e-05	4.53608e-05	7.89562e-05	7.32817e-05	8.43096e-05	1.312e-05	5.37515e-05
614	1.7786e-05	6.32362e-05	4.53608e-05	7.90667e-05	7.24851e-05	8.40101e-05	1.312e-05	5.35808e-05
615	1.7786e-05	6.22708e-05	4.59314e-05	7.98397e-05	7.16886e-05	8.40101e-05	1.312e-05	5.3521e-05
616	9.3035e-06	2.65496e-05	2.68171e-05	6.01834e-05	3.90305e-05	6.3644e-05	6.5602e-06	3.31555e-05
617	1.2313e-05	3.04113e-05	4.62167e-05	7.15575e-05	7.40782e-05	7.72713e-05	0	4.45498e-05
618	1.2313e-05	3.0894e-05	4.79284e-05	7.22201e-05	7.48747e-05	7.77206e-05	0	4.51359e-05
619	1.204e-05	3.04113e-05	4.70726e-05	7.04533e-05	7.40782e-05	7.51748e-05	0	4.41757e-05
620	1.204e-05	3.04113e-05	4.70726e-05	7.05637e-05	7.40782e-05	7.51748e-05	0	4.41915e-05
621	1.204e-05	2.94459e-05	4.67873e-05	6.83551e-05	7.40782e-05	7.27788e-05	0	4.3355e-05
622	1.2313e-05	2.89631e-05	4.56461e-05	6.75821e-05	7.24851e-05	7.21798e-05	0	4.27385e-05
623	8.4826e-06	1.35161e-05	3.48052e-05	3.56683e-05	5.41647e-05	3.89352e-05	0	2.65103e-05
624	8.4826e-06	1.39989e-05	3.53757e-05	3.72143e-05	5.41647e-05	4.13312e-05	0	2.72239e-05
625	8.4826e-06	1.39989e-05	3.50905e-05	3.66622e-05	5.25716e-05	4.08819e-05	0	2.68125e-05
626	8.4826e-06	1.35161e-05	3.30934e-05	3.45641e-05	5.25716e-05	3.95342e-05	0	2.5966e-05
627	1.806e-05	1.78606e-05	4.56461e-05	4.79259e-05	5.73509e-05	5.6456e-05	1.312e-05	3.66314e-05
628	1.806e-05	1.78606e-05	4.56461e-05	4.80363e-05	5.73509e-05	5.67555e-05	1.312e-05	3.66899e-05
629	1.806e-05	1.78606e-05	4.56461e-05	4.79259e-05	5.73509e-05	5.66057e-05	1.312e-05	3.66528e-05
630	1.806e-05	1.78606e-05	4.56461e-05	4.80363e-05	5.73509e-05	5.66057e-05	1.312e-05	3.66685e-05
631	1.806e-05	1.68952e-05	4.50755e-05	4.57173e-05	5.73509e-05	5.39102e-05	1.312e-05	3.57328e-05
632	1.806e-05	1.68952e-05	4.50755e-05	4.57173e-05	5.73509e-05	5.39102e-05	1.312e-05	3.57328e-05
633	1.806e-05	1.68952e-05	4.47903e-05	4.57173e-05	5.57578e-05	5.37605e-05	1.312e-05	3.5443e-05
634	1.7512e-05	1.49643e-05	4.25079e-05	4.2294e-05	5.17751e-05	5.00167e-05	1.312e-05	3.31701e-05
635	1.7512e-05	1.44816e-05	4.25079e-05	4.24045e-05	5.09785e-05	4.9867e-05	1.312e-05	3.29818e-05
636	1.6692e-05	1.35161e-05	4.05109e-05	4.0748e-05	5.09785e-05	4.82197e-05	1.312e-05	3.19693e-05
637	1.3955e-05	1.2068e-05	3.42346e-05	3.29076e-05	4.14201e-05	3.83362e-05	1.312e-05	2.65774e-05
638	2.5995e-05	1.68952e-05	4.4505e-05	4.63799e-05	4.77924e-05	5.00167e-05	2.6241e-05	3.68322e-05
639	2.6269e-05	1.68952e-05	4.39344e-05	4.6932e-05	4.77924e-05	5.01665e-05	2.6241e-05	3.689e-05
640	2.6542e-05	1.97915e-05	4.47903e-05	4.86989e-05	4.54028e-05	5.21132e-05	2.6241e-05	3.76543e-05
641	2.5721e-05	1.73779e-05	3.99404e-05	4.47235e-05	3.90305e-05	4.79202e-05	2.6241e-05	3.44221e-05
642	3.2836e-05	1.93088e-05	4.8499e-05	4.96927e-05	4.22166e-05	5.43595e-05	2.6241e-05	3.90219e-05
643	3.3657e-05	1.93088e-05	4.87843e-05	5.0024e-05	4.30132e-05	5.49585e-05	2.6241e-05	3.94266e-05
644	3.3657e-05	1.93088e-05	4.87843e-05	4.95823e-05	4.14201e-05	5.43595e-05	2.6241e-05	3.90504e-05
645	3.3657e-05	1.93088e-05	4.87843e-05	4.94719e-05	4.14201e-05	5.39102e-05	2.6241e-05	3.89704e-05
646	2.5721e-05	1.64125e-05	4.13668e-05	3.97542e-05	3.18616e-05	4.14809e-05	1.312e-05	2.99597e-05
647	2.6269e-05	1.64125e-05	4.16521e-05	4.06376e-05	3.18616e-05	4.26789e-05	1.312e-05	3.0376e-05
648	2.6269e-05	1.64125e-05	4.16521e-05	4.06376e-05	3.18616e-05	4.26789e-05	1.312e-05	3.0376e-05
649	2.6269e-05	1.64125e-05	4.16521e-05	4.0748e-05	3.18616e-05	4.28287e-05	1.312e-05	3.04131e-05
650	2.6269e-05	1.64125e-05	4.16521e-05	4.0748e-05	3.18616e-05	4.28287e-05	1.312e-05	3.04131e-05
651	2.6269e-05	1.64125e-05	4.16521e-05	4.0748e-05	3.18616e-05	4.25292e-05	1.312e-05	3.03704e-05
652	2.5721e-05	1.64125e-05	4.13668e-05	3.9975e-05	3.18616e-05	4.17804e-05	1.312e-05	3.0034e-05
653	2.5721e-05	1.64125e-05	4.13668e-05	3.9975e-05	3.18616e-05	4.17804e-05	1.312e-05	3.0034e-05
654	2.5721e-05	1.59297e-05	4.02256e-05	3.90916e-05	3.10651e-05	4.04327e-05	1.312e-05	2.93695e-05
655	2.5721e-05	1.59297e-05	4.02256e-05	3.90916e-05	3.10651e-05	4.04327e-05	1.312e-05	2.93695e-05
656	2.5721e-05	1.59297e-05	3.96551e-05	3.90916e-05	3.10651e-05	4.01332e-05	1.312e-05	2.92452e-05
657	1.6144e-05	9.17166e-06	2.79582e-05	2.77175e-05	2.23031e-05	2.81531e-05	1.312e-05	2.06526e-05
658	1.6144e-05	9.65438e-06	2.79582e-05	2.76071e-05	2.23031e-05	2.84526e-05	6.5602e-06	1.98114e-05
659	1.6144e-05	9.65438e-06	2.73877e-05	2.72758e-05	2.23031e-05	2.81531e-05	6.5602e-06	1.96398e-05
660	1.6144e-05	8.68894e-06	2.68171e-05	2.68341e-05	2.15066e-05	2.74044e-05	6.5602e-06	1.91365e-05
661	1.505e-05	8.20623e-06	2.42495e-05	2.58402e-05	1.9117e-05	2.66556e-05	6.5602e-06	1.79541e-05
662	8.209e-07	9.65438e-07	5.70576e-07	4.3067e-06	3.18616e-06	4.79202e-06	6.5602e-06	3.02886e-06
663	2.4627e-06	7.24079e-06	3.13817e-06	7.84041e-06	1.11516e-05	8.83529e-06	0	5.80984e-06
664	2.4627e-06	8.68894e-06	4.56461e-06	8.94469e-06	1.27446e-05	1.0183e-05	0	6.79837e-06
665	2.7363e-06	8.68894e-06	4.8499e-06	9.82812e-06	1.27446e-05	1.16805e-05	0	7.21835e-06
666	2.7363e-06	8.68894e-06	5.42048e-06	9.93855e-06	1.27446e-05	1.16805e-05	0	7.31564e-06
667	3.01e-06	8.68894e-06	5.42048e-06	1.0049e-05	1.19481e-05	1.18303e-05	0	7.27811e-06
668	3.01e-06	8.68894e-06	5.42048e-06	9.16555e-06	1.19481e-05	1.0782e-05	0	7.00215e-06
669	4.1045e-06	9.17166e-06	6.84692e-06	1.09324e-05	1.35412e-05	1.21298e-05	0	8.10378e-06
670	4.1045e-06	9.65438e-06	7.41749e-06	1.09324e-05	1.35412e-05	1.21298e-05	0	8.25425e-06
671	4.1045e-06	9.65438e-06	7.41749e-06	1.09324e-05	1.35412e-05	1.24293e-05	0	8.29704e-06
672	4.1045e-06	9.65438e-06	7.41749e-06	1.10428e-05	1.35412e-05	1.24293e-05	0	8.31281e-06
673	4.1045e-06	9.65438e-06	7.41749e-06	1.10428e-05	1.35412e-05	1.24293e-05	0	8.31281e-06
674	4.1045e-06	9.65438e-06	7.41749e-06	1.10428e-05	1.35412e-05	1.24293e-05	0	8.31281e-06
675	4.1045e-06	9.65438e-06	7.41749e-06	1.10428e-05	1.35412e-05	1.21298e-05	0	8.27002e-06
676	4.1045e-06	9.65438e-06	7.41749e-06	1.09324e-05	1.35412e-05	1.19801e-05	0	8.23286e-06
677	4.1045e-06	9.65438e-06	7.41749e-06	1.09324e-05	1.35412e-05	1.18303e-05	0	8.21146e-06
678	3.8309e-06	9.65438e-06	7.41749e-06	1.0822e-05	1.35412e-05	1.15308e-05	0	8.11381e-06
679	3.8309e-06	9.17166e-06	7.41749e-06	9.71769e-06	1.35412e-05	1.04825e-05	0	7.73735e-06
680	3.8309e-06	9.17166e-06	7.41749e-06	9.71769e-06	1.35412e-05	1.04825e-05	0	7.73735e-06
681	3.5572e-06	9.17166e-06	7.41749e-06	9.27598e-06	1.27446e-05	1.00333e-05	0	7.45718e-06
682	3.5572e-06	9.17166e-06	7.41749e-06	9.49683e-06	1.27446e-05	1.0183e-05	0	7.51013e-06
683	3.5572e-06	9.17166e-06	7.41749e-06	9.49683e-06	1.27446e-05	1.00333e-05	0	7.48873e-06
684	3.01e-06	5.30991e-06	5.99105e-06	7.06741e-06	7.16886e-06	7.03828e-06	0	5.08364e-06
685	3.2836e-06	6.27535e-06	6.27634e-06	7.84041e-06	7.16886e-06	7.48753e-06	0	5.47601e-06
686	3.2836e-06	6.27535e-06	6.27634e-06	7.84041e-06	7.16886e-06	7.48753e-06	0	5.47601e-06
687	3.2836e-06	5.79263e-06	5.70576e-06	7.72998e-06	6.37232e-06	7.48753e-06	0	5.19597e-06
688	1.9154e-06	4.34447e-06	2.56759e-06	5.19013e-06	3.18616e-06	4.64227e-06	0	3.12086e-06
689	1.9154e-06	4.34447e-06	2.56759e-06	5.30056e-06	3.18616e-06	4.79202e-06	0	3.15803e-06
690	1.9154e-06	4.34447e-06	2.56759e-06	5.30056e-06	3.18616e-06	4.79202e-06	0	3.15803e-06
691	1.3682e-06	2.4136e-06	1.71173e-06	4.52756e-06	3.18616e-06	4.19302e-06	0	2.48575e-06
692	1.9154e-06	2.4136e-06	1.71173e-06	4.74842e-06	3.18616e-06	4.34277e-06	0	2.61687e-06
693	1.9154e-06	2.4136e-06	1.71173e-06	4.63799e-06	3.18616e-06	4.34277e-06	0	2.6011e-06
694	1.3682e-06	1.93088e-06	1.42644e-06	4.52756e-06	3.18616e-06	3.89352e-06	0	2.33325e-06
695	1.3682e-06	1.93088e-06	1.42644e-06	4.3067e-06	3.18616e-06	4.04327e-06	0	2.32309e-06
696	1.3682e-06	1.93088e-06	1.42644e-06	4.3067e-06	2.38962e-06	4.04327e-06	0	2.2093e-06
697	1.3682e-06	1.93088e-06	1.42644e-06	4.19628e-06	2.38962e-06	4.04327e-06	0	2.19352e-06
698	1.3682e-06	9.65438e-07	5.70576e-07	2.87114e-06	2.38962e-06	2.84526e-06	0	1.57288e-06
699	1.6418e-06	9.65438e-07	5.70576e-07	3.09199e-06	2.38962e-06	2.99501e-06	0	1.66492e-06
700	1.3682e-06	9.65438e-07	5.70576e-07	2.98156e-06	2.38962e-06	2.39601e-06	0	1.52448e-06
701	1.6418e-06	3.86175e-06	1.14115e-06	3.53371e-06	2.38962e-06	2.84526e-06	0	2.2019e-06
702	1.6418e-06	3.86175e-06	1.42644e-06	3.53371e-06	2.38962e-06	2.84526e-06	0	2.24265e-06
703	1.6418e-06	3.86175e-06	1.42644e-06	3.53371e-06	2.38962e-06	2.84526e-06	0	2.24265e-06
704	1.6418e-06	3.86175e-06	1.42644e-06	3.53371e-06	2.38962e-06	2.84526e-06	0	2.24265e-06
705	1.6418e-06	3.37903e-06	1.42644e-06	3.53371e-06	2.38962e-06	2.84526e-06	0	2.17369e-06
706	1.6418e-06	3.37903e-06	1.42644e-06	3.53371e-06	2.38962e-06	2.84526e-06	0	2.17369e-06
707	1.0945e-06	3.37903e-06	8.55865e-07	2.42942e-06	2.38962e-06	1.79701e-06	0	1.7065e-06
708	1.6418e-06	7.72351e-06	1.99702e-06	3.42328e-06	3.18616e-06	3.14476e-06	0	3.01665e-06
709	1.6418e-06	7.72351e-06	1.99702e-06	3.42328e-06	3.9827e-06	3.14476e-06	0	3.13044e-06
710	1.9154e-06	7.72351e-06	1.99702e-06	3.31285e-06	1.59308e-06	2.99501e-06	0	2.79098e-06
711	2.4627e-06	7.72351e-06	2.85288e-06	6.07356e-06	2.38962e-06	5.69052e-06	0	3.88468e-06
712	2.4627e-06	7.72351e-06	2.85288e-06	6.07356e-06	2.38962e-06	5.69052e-06	0	3.88468e-06
713	2.4627e-06	7.72351e-06	2.85288e-06	6.18399e-06	2.38962e-06	5.69052e-06	0	3.90046e-06
714	2.4627e-06	7.72351e-06	2.85288e-06	6.07356e-06	2.38962e-06	5.54077e-06	0	3.86329e-06
715	3.01e-06	8.68894e-06	3.13817e-06	6.84656e-06	2.38962e-06	6.88853e-06	0	4.42311e-06
716	3.01e-06	8.68894e-06	3.13817e-06	6.95698e-06	2.38962e-06	7.03828e-06	0	4.46028e-06
717	3.01e-06	8.68894e-06	3.13817e-06	7.17784e-06	2.38962e-06	7.03828e-06	0	4.49183e-06
718	3.01e-06	8.68894e-06	3.42346e-06	7.17784e-06	2.38962e-06	7.03828e-06	0	4.53259e-06
719	2.7363e-06	8.20623e-06	3.42346e-06	6.84656e-06	2.38962e-06	7.03828e-06	0	4.37721e-06
720	3.8309e-06	9.65438e-06	3.99404e-06	8.50298e-06	3.18616e-06	1.00333e-05	0	5.60024e-06
721	3.8309e-06	9.65438e-06	3.99404e-06	8.61341e-06	3.18616e-06	1.00333e-05	0	5.61602e-06
722	3.8309e-06	9.65438e-06	3.99404e-06	8.61341e-06	3.18616e-06	1.00333e-05	0	5.61602e-06
723	3.8309e-06	9.65438e-06	3.99404e-06	8.61341e-06	3.18616e-06	1.00333e-05	0	5.61602e-06
724	3.8309e-06	8.68894e-06	3.99404e-06	8.50298e-06	3.18616e-06	9.88354e-06	0	5.44093e-06
725	3.8309e-06	8.68894e-06	3.99404e-06	8.39255e-06	3.18616e-06	9.88354e-06	0	5.42516e-06
726	3.8309e-06	7.24079e-06	3.70875e-06	7.84041e-06	3.18616e-06	8.98504e-06	0	4.97029e-06
727	3.8309e-06	7.24079e-06	3.70875e-06	7.72998e-06	3.18616e-06	8.98504e-06	0	4.95451e-06
728	3.5572e-06	6.27535e-06	3.70875e-06	7.61955e-06	3.18616e-06	8.68554e-06	0	4.71894e-06
729	3.5572e-06	5.30991e-06	3.42346e-06	7.28827e-06	3.18616e-06	8.53579e-06	0	4.47154e-06
730	2.4627e-06	4.34447e-06	2.28231e-06	4.63799e-06	2.38962e-06	6.28953e-06	0	3.20094e-06
731	2.4627e-06	4.34447e-06	2.28231e-06	4.63799e-06	2.38962e-06	6.28953e-06	0	3.20094e-06
732	2.1891e-06	3.37903e-06	2.28231e-06	4.3067e-06	2.38962e-06	5.24127e-06	0	2.82686e-06
733	2.1891e-06	3.37903e-06	2.28231e-06	4.3067e-06	2.38962e-06	5.24127e-06	0	2.82686e-06
734	2.1891e-06	2.4136e-06	1.99702e-06	3.97542e-06	2.38962e-06	4.94177e-06	0	2.55807e-06
735	2.1891e-06	2.4136e-06	1.99702e-06	3.97542e-06	2.38962e-06	4.94177e-06	0	2.55807e-06
736	2.1891e-06	2.4136e-06	1.99702e-06	3.97542e-06	2.38962e-06	4.94177e-06	0	2.55807e-06
737	2.1891e-06	2.4136e-06	1.99702e-06	3.97542e-06	2.38962e-06	4.79202e-06	0	2.53668e-06
738	2.1891e-06	2.4136e-06	1.99702e-06	3.97542e-06	2.38962e-06	4.79202e-06	0	2.53668e-06
739	2.1891e-06	2.4136e-06	1.99702e-06	3.86499e-06	1.59308e-06	4.79202e-06	0	2.40711e-06
740	2.1891e-06	2.4136e-06	1.99702e-06	3.64413e-06	1.59308e-06	4.79202e-06	0	2.37556e-06
741	2.1891e-06	1.93088e-06	1.99702e-06	3.20242e-06	1.59308e-06	4.49252e-06	0	2.20071e-06
742	2.1891e-06	1.93088e-06	1.99702e-06	3.31285e-06	1.59308e-06	4.34277e-06	0	2.19509e-06
743	2.1891e-06	1.93088e-06	1.71173e-06	3.20242e-06	1.59308e-06	4.19302e-06	0	2.11717e-06
744	2.1891e-06	1.93088e-06	1.71173e-06	3.42328e-06	1.59308e-06	3.74377e-06	0	2.08454e-06
745	2.1891e-06	1.93088e-06	1.71173e-06	3.42328e-06	1.59308e-06	3.74377e-06	0	2.08454e-06
746	8.209e-07	9.65438e-07	8.55865e-07	2.53985e-06	1.59308e-06	3.14476e-06	0	1.41713e-06
747	5.4726e-07	4.82719e-07	5.70576e-07	1.76685e-06	1.59308e-06	1.94676e-06	0	9.8675e-07
748	8.209e-07	4.82719e-07	5.70576e-07	3.31285e-06	1.59308e-06	2.39601e-06	0	1.31088e-06
749	8.209e-07	4.82719e-07	5.70576e-07	3.31285e-06	1.59308e-06	2.54576e-06	0	1.33227e-06
750	1.0945e-06	4.82719e-07	5.70576e-07	3.86499e-06	1.59308e-06	3.44426e-06	0	1.57859e-06
751	1.0945e-06	4.82719e-07	5.70576e-07	3.86499e-06	1.59308e-06	3.44426e-06	0	1.57859e-06
752	1.0945e-06	4.82719e-07	5.70576e-07	3.97542e-06	1.59308e-06	3.44426e-06	0	1.59437e-06
753	1.0945e-06	4.82719e-07	5.70576e-07	3.97542e-06	1.59308e-06	3.44426e-06	0	1.59437e-06
754	1.0945e-06	4.82719e-07	5.70576e-07	3.97542e-06	1.59308e-06	3.44426e-06	0	1.59437e-06
755	1.0945e-06	0	5.70576e-07	3.86499e-06	1.59308e-06	3.14476e-06	0	1.46685e-06
756	1.0945e-06	0	5.70576e-07	3.86499e-06	1.59308e-06	3.14476e-06	0	1.46685e-06
757	1.0945e-06	0	5.70576e-07	3.64413e-06	1.59308e-06	3.14476e-06	0	1.4353e-06
758	1.0945e-06	0	5.70576e-07	3.64413e-06	7.9654e-07	3.14476e-06	0	1.32151e-06
759	8.209e-07	0	5.70576e-07	3.42328e-06	7.9654e-07	2.39601e-06	0	1.1439e-06
760	8.209e-07	0	2.85288e-07	3.42328e-06	7.9654e-07	2.39601e-06	0	1.10314e-06
761	8.209e-07	0	2.85288e-07	3.42328e-06	7.9654e-07	2.39601e-06	0	1.10314e-06
762	8.209e-07	0	2.85288e-07	3.42328e-06	7.9654e-07	2.39601e-06	0	1.10314e-06
763	8.209e-07	0	2.85288e-07	3.42328e-06	7.9654e-07	2.24626e-06	0	1.08175e-06
764	8.209e-07	0	2.85288e-07	3.42328e-06	7.9654e-07	2.24626e-06	0	1.08175e-06
765	8.209e-07	0	2.85288e-07	3.31285e-06	7.9654e-07	2.09651e-06	0	1.04458e-06
766	8.209e-07	0	2.85288e-07	3.31285e-06	7.9654e-07	2.09651e-06	0	1.04458e-06
767	8.209e-07	0	2.85288e-07	3.20242e-06	7.9654e-07	2.09651e-06	0	1.02881e-06
768	8.209e-07	0	2.85288e-07	3.20242e-06	7.9654e-07	2.24626e-06	0	1.0502e-06
769	8.209e-07	0	2.85288e-07	3.20242e-06	7.9654e-07	2.24626e-06	0	1.0502e-06
770	8.209e-07	0	2.85288e-07	3.09199e-06	7.9654e-07	2.24626e-06	0	1.03443e-06
771	8.209e-07	0	2.85288e-07	3.09199e-06	7.9654e-07	2.24626e-06	0	1.03443e-06
772	8.209e-07	0	2.85288e-07	2.87114e-06	7.9654e-07	2.09651e-06	0	9.81481e-07
773	8.209e-07	0	2.85288e-07	2.76071e-06	7.9654e-07	1.94676e-06	0	9.44313e-07
774	8.209e-07	0	0	2.76071e-06	7.9654e-07	1.79701e-06	0	8.82165e-07
775	8.209e-07	0	0	3.09199e-06	7.9654e-07	1.94676e-06	0	9.50884e-07
776	1.0945e-06	0	0	3.09199e-06	7.9654e-07	2.39601e-06	0	1.05415e-06
777	1.0945e-06	0	0	3.09199e-06	7.9654e-07	2.54576e-06	0	1.07555e-06
778	1.0945e-06	0	0	3.09199e-06	7.9654e-07	2.54576e-06	0	1.07555e-06
779	1.0945e-06	0	0	3.09199e-06	7.9654e-07	2.54576e-06	0	1.07555e-06
780	1.0945e-06	0	0	3.20242e-06	7.9654e-07	2.54576e-06	0	1.09132e-06
781	1.0945e-06	0	0	3.42328e-06	7.9654e-07	3.14476e-06	0	1.20844e-06
782	1.0945e-06	0	0	3.42328e-06	7.9654e-07	3.14476e-06	0	1.20844e-06
783	1.6418e-06	0	0	3.53371e-06	7.9654e-07	3.29451e-06	0	1.32379e-06
784	1.6418e-06	0	0	3.53371e-06	7.9654e-07	3.29451e-06	0	1.32379e-06
785	1.6418e-06	0	0	3.53371e-06	7.9654e-07	3.29451e-06	0	1.32379e-06
786	1.6418e-06	0	0	3.53371e-06	7.9654e-07	3.29451e-06	0	1.32379e-06
787	1.6418e-06	0	0	3.53371e-06	7.9654e-07	3.29451e-06	0	1.32379e-06
788	1.6418e-06	0	0	3.53371e-06	7.9654e-07	3.29451e-06	0	1.32379e-06
789	1.9154e-06	0	5.70576e-07	3.86499e-06	7.9654e-07	3.44426e-06	0	1.51311e-06
790	1.9154e-06	0	5.70576e-07	3.53371e-06	7.9654e-07	3.44426e-06	0	1.46579e-06
791	1.9154e-06	0	5.70576e-07	3.53371e-06	7.9654e-07	3.44426e-06	0	1.46579e-06
792	1.0945e-06	0	5.70576e-07	3.09199e-06	7.9654e-07	2.39601e-06	0	1.13566e-06
793	1.3682e-06	0	1.14115e-06	3.31285e-06	7.9654e-07	2.69551e-06	0	1.3306e-06
794	1.3682e-06	0	1.14115e-06	3.31285e-06	7.9654e-07	2.69551e-06	0	1.3306e-06
795	1.3682e-06	0	1.14115e-06	3.42328e-06	7.9654e-07	2.69551e-06	0	1.34638e-06
796	1.3682e-06	0	1.14115e-06	3.09199e-06	7.9654e-07	2.84526e-06	0	1.32044e-06
797	1.6418e-06	0	1.14115e-06	3.53371e-06	7.9654e-07	3.44426e-06	0	1.50821e-06
798	1.6418e-06	0	1.42644e-06	2.53985e-06	7.9654e-07	3.14476e-06	0	1.3642e-06
799	2.4627e-06	2.89631e-06	2.28231e-06	5.30056e-06	4.77924e-06	5.39102e-06	0	3.30173e-06
800	2.4627e-06	2.89631e-06	2.56759e-06	5.0797e-06	5.57578e-06	5.39102e-06	0	3.42473e-06
801	2.5448e-05	1.35161e-05	1.74026e-05	2.81592e-05	1.27446e-05	2.72546e-05	1.312e-05	1.96636e-05
802	2.9005e-05	1.49643e-05	2.05408e-05	3.19138e-05	1.27446e-05	3.20466e-05	1.312e-05	2.20479e-05
803	3.0373e-05	1.49643e-05	2.11113e-05	3.32389e-05	1.35412e-05	3.29451e-05	1.312e-05	2.27564e-05
804	3.4751e-05	1.73779e-05	2.25378e-05	3.65518e-05	1.67273e-05	3.44426e-05	1.9681e-05	2.60099e-05
805	3.5572e-05	1.73779e-05	2.25378e-05	3.68831e-05	1.67273e-05	3.50416e-05	1.9681e-05	2.62601e-05
806	3.5572e-05	1.73779e-05	2.25378e-05	3.68831e-05	1.67273e-05	3.50416e-05	1.9681e-05	2.62601e-05
807	3.5572e-05	1.73779e-05	2.25378e-05	3.73248e-05	1.67273e-05	3.51914e-05	1.9681e-05	2.63446e-05
808	3.6119e-05	1.78606e-05	2.25378e-05	3.76561e-05	1.75239e-05	3.56407e-05	1.9681e-05	2.6717e-05
809	3.6393e-05	1.78606e-05	2.25378e-05	3.76561e-05	1.75239e-05	3.57904e-05	1.9681e-05	2.67775e-05
810	3.7214e-05	1.78606e-05	2.25378e-05	3.79873e-05	1.75239e-05	3.60899e-05	1.9681e-05	2.69849e-05
811	3.7214e-05	1.83433e-05	2.28231e-05	3.79873e-05	1.75239e-05	3.62397e-05	1.9681e-05	2.7116e-05
812	3.7214e-05	1.83433e-05	2.28231e-05	3.79873e-05	1.75239e-05	3.62397e-05	1.9681e-05	2.7116e-05
813	3.7214e-05	1.83433e-05	2.28231e-05	3.82082e-05	1.75239e-05	3.63894e-05	1.9681e-05	2.71689e-05
814	4.7886e-05	2.46187e-05	2.85288e-05	4.94719e-05	1.9117e-05	4.9268e-05	1.9681e-05	3.40815e-05
815	4.8433e-05	2.60668e-05	2.85288e-05	4.99136e-05	1.9117e-05	5.01665e-05	1.9681e-05	3.4558e-05
816	4.8707e-05	2.60668e-05	2.85288e-05	5.09075e-05	1.9117e-05	5.06157e-05	1.9681e-05	3.48033e-05
817	4.8707e-05	2.60668e-05	2.85288e-05	5.11283e-05	1.9117e-05	5.06157e-05	1.9681e-05	3.48348e-05
818	5.199e-05	2.70323e-05	2.88141e-05	5.25639e-05	1.99135e-05	5.13645e-05	1.9681e-05	3.59084e-05
819	5.2264e-05	2.70323e-05	2.88141e-05	5.25639e-05	1.99135e-05	5.13645e-05	1.9681e-05	3.59475e-05
820	5.2537e-05	2.70323e-05	2.90994e-05	5.26743e-05	1.99135e-05	5.15142e-05	1.9681e-05	3.60645e-05
821	5.2537e-05	2.70323e-05	2.90994e-05	5.26743e-05	1.99135e-05	5.15142e-05	1.9681e-05	3.60645e-05
822	4.8159e-05	2.46187e-05	2.56759e-05	4.90302e-05	1.99135e-05	4.62729e-05	1.9681e-05	3.33359e-05
823	4.4328e-05	2.22051e-05	2.33936e-05	4.47235e-05	1.9117e-05	4.38769e-05	1.9681e-05	3.10465e-05
824	2.9005e-05	1.25507e-05	1.51203e-05	3.02574e-05	1.0355e-05	3.15974e-05	1.312e-05	2.02866e-05
825	3.1468e-05	1.5447e-05	1.71173e-05	3.33493e-05	1.35412e-05	3.45924e-05	1.312e-05	2.26622e-05
826	3.1194e-05	1.49643e-05	1.6832e-05	3.32389e-05	1.35412e-05	3.45924e-05	1.312e-05	2.24976e-05
827	3.1194e-05	1.49643e-05	1.6832e-05	3.32389e-05	1.35412e-05	3.45924e-05	1.312e-05	2.24976e-05
828	3.1194e-05	1.49643e-05	1.6832e-05	3.32389e-05	1.35412e-05	3.45924e-05	1.312e-05	2.24976e-05
829	2.7637e-05	1.44816e-05	1.51203e-05	3.08095e-05	1.35412e-05	2.99501e-05	6.5602e-06	1.97285e-05
830	2.2985e-05	1.39989e-05	1.25527e-05	2.69445e-05	1.19481e-05	2.59069e-05	6.5602e-06	1.72709e-05
831	2.2985e-05	1.39989e-05	1.22674e-05	2.71654e-05	1.19481e-05	2.66556e-05	6.5602e-06	1.73687e-05
832	2.2985e-05	1.39989e-05	1.22674e-05	2.71654e-05	1.19481e-05	2.66556e-05	6.5602e-06	1.73687e-05
833	1.9428e-05	1.30334e-05	9.98509e-06	2.19752e-05	1.0355e-05	2.20133e-05	6.5602e-06	1.47643e-05
834	1.204e-05	7.72351e-06	6.56163e-06	1.6233e-05	8.76194e-06	1.24293e-05	6.5602e-06	1.00442e-05
835	1.2587e-05	8.68894e-06	7.98807e-06	1.6233e-05	9.55848e-06	1.33278e-05	6.5602e-06	1.07062e-05
836	1.2587e-05	8.68894e-06	7.98807e-06	1.64538e-05	8.76194e-06	1.33278e-05	6.5602e-06	1.0624e-05
837	1.2587e-05	8.68894e-06	7.70278e-06	1.65642e-05	7.9654e-06	1.30283e-05	6.5602e-06	1.04424e-05
838	1.204e-05	8.68894e-06	7.70278e-06	1.64538e-05	7.9654e-06	1.28786e-05	6.5602e-06	1.03271e-05
839	9.8508e-06	8.20623e-06	7.13221e-06	1.40244e-05	7.9654e-06	1.1381e-05	6.5602e-06	9.30289e-06
840	6.5672e-06	6.75807e-06	5.13519e-06	6.84656e-06	7.9654e-06	6.58903e-06	6.5602e-06	6.63166e-06
841	8.7562e-06	7.24079e-06	5.70576e-06	1.21471e-05	8.76194e-06	1.06323e-05	6.5602e-06	8.54348e-06
842	8.7562e-06	7.24079e-06	5.70576e-06	1.26993e-05	9.55848e-06	1.10815e-05	6.5602e-06	8.80033e-06
843	8.7562e-06	6.75807e-06	5.70576e-06	1.29201e-05	9.55848e-06	1.10815e-05	6.5602e-06	8.76292e-06
844	8.4826e-06	6.27535e-06	5.13519e-06	1.2368e-05	8.76194e-06	1.06323e-05	6.5602e-06	8.31651e-06
845	4.3781e-06	6.27535e-06	3.13817e-06	1.01594e-05	5.57578e-06	8.53579e-06	6.5602e-06	6.37469e-06
846	5.7463e-06	7.24079e-06	3.99404e-06	1.21471e-05	6.37232e-06	1.12313e-05	6.5602e-06	7.61315e-06
847	5.4726e-06	6.75807e-06	3.70875e-06	1.19263e-05	5.57578e-06	1.12313e-05	6.5602e-06	7.319e-06
848	1.0945e-05	1.49643e-05	7.70278e-06	1.89937e-05	1.0355e-05	2.03661e-05	6.5602e-06	1.28411e-05
849	1.1219e-05	1.68952e-05	7.98807e-06	1.98771e-05	1.0355e-05	2.09651e-05	6.5602e-06	1.34085e-05
850	1.0672e-05	1.64125e-05	7.98807e-06	1.95458e-05	9.55848e-06	2.08153e-05	1.312e-05	1.4016e-05
851	1.0672e-05	1.68952e-05	8.27336e-06	2.05397e-05	1.0355e-05	2.11148e-05	1.312e-05	1.44243e-05
852	1.0672e-05	1.64125e-05	8.27336e-06	2.04292e-05	1.0355e-05	2.03661e-05	1.312e-05	1.42326e-05
853	1.2861e-05	2.12396e-05	1.16968e-05	2.46255e-05	1.59308e-05	2.56074e-05	1.9681e-05	1.88059e-05
854	1.2861e-05	2.17224e-05	1.16968e-05	2.47359e-05	1.59308e-05	2.56074e-05	1.9681e-05	1.88907e-05
855	1.2861e-05	2.26878e-05	1.16968e-05	2.48464e-05	1.59308e-05	2.56074e-05	1.9681e-05	1.90444e-05
856	1.2861e-05	2.26878e-05	1.16968e-05	2.49568e-05	1.59308e-05	2.56074e-05	1.9681e-05	1.90601e-05
857	1.2861e-05	2.26878e-05	1.16968e-05	2.49568e-05	1.59308e-05	2.56074e-05	1.9681e-05	1.90601e-05
858	1.2861e-05	2.26878e-05	1.16968e-05	2.49568e-05	1.59308e-05	2.57571e-05	1.9681e-05	1.90815e-05
859	1.2587e-05	2.26878e-05	1.16968e-05	2.49568e-05	1.59308e-05	2.57571e-05	1.9681e-05	1.90424e-05
860	1.2587e-05	2.26878e-05	1.14115e-05	2.48464e-05	1.59308e-05	2.51581e-05	1.9681e-05	1.89003e-05
861	1.1766e-05	2.26878e-05	1.11262e-05	2.37421e-05	1.59308e-05	2.38104e-05	1.312e-05	1.74548e-05
862	1.2313e-05	2.31705e-05	1.11262e-05	2.41838e-05	1.67273e-05	2.50084e-05	1.312e-05	1.795e-05
863	1.2313e-05	2.31705e-05	1.0841e-05	2.41838e-05	1.67273e-05	2.51581e-05	1.312e-05	1.79307e-05
864	1.2313e-05	2.31705e-05	1.0841e-05	2.39629e-05	1.67273e-05	2.51581e-05	1.312e-05	1.78991e-05
865	1.2587e-05	2.31705e-05	1.0841e-05	2.39629e-05	1.67273e-05	2.50084e-05	1.312e-05	1.79168e-05
866	1.2587e-05	2.26878e-05	1.0841e-05	2.36317e-05	1.67273e-05	2.47089e-05	1.312e-05	1.77577e-05
867	5.4726e-06	1.35161e-05	6.84692e-06	1.24784e-05	9.55848e-06	1.40766e-05	1.312e-05	1.07242e-05
868	5.4726e-06	1.35161e-05	6.84692e-06	1.29201e-05	9.55848e-06	1.40766e-05	1.312e-05	1.07873e-05
869	5.4726e-06	1.30334e-05	6.84692e-06	1.28097e-05	9.55848e-06	1.40766e-05	1.312e-05	1.07026e-05
870	5.4726e-06	1.30334e-05	6.84692e-06	1.26993e-05	9.55848e-06	1.40766e-05	1.312e-05	1.06868e-05
871	4.6518e-06	9.65438e-06	5.42048e-06	1.09324e-05	7.9654e-06	1.18303e-05	1.312e-05	9.08216e-06
872	4.6518e-06	9.65438e-06	5.13519e-06	1.09324e-05	7.9654e-06	1.16805e-05	1.312e-05	9.02002e-06
873	4.6518e-06	9.17166e-06	4.56461e-06	1.0049e-05	7.9654e-06	1.10815e-05	1.312e-05	8.65777e-06
874	2.4627e-06	3.86175e-06	1.99702e-06	5.96313e-06	3.18616e-06	6.58903e-06	6.5602e-06	4.37429e-06
875	2.1891e-06	4.34447e-06	1.99702e-06	5.96313e-06	3.18616e-06	6.43928e-06	0	3.44559e-06
876	1.6418e-06	3.86175e-06	1.71173e-06	4.52756e-06	2.38962e-06	4.94177e-06	0	2.72489e-06
877	1.9154e-06	3.86175e-06	2.56759e-06	4.85885e-06	2.38962e-06	5.24127e-06	0	2.97636e-06
878	1.9154e-06	3.86175e-06	2.56759e-06	4.63799e-06	2.38962e-06	4.64227e-06	0	2.85924e-06
879	1.9154e-06	2.89631e-06	1.99702e-06	4.41713e-06	1.59308e-06	3.89352e-06	0	2.3875e-06
880	3.01e-06	2.89631e-06	1.99702e-06	5.19013e-06	3.18616e-06	5.39102e-06	0	3.0958e-06
881	3.2836e-06	2.89631e-06	1.99702e-06	5.0797e-06	3.18616e-06	5.39102e-06	0	3.11912e-06
882	3.2836e-06	2.89631e-06	1.99702e-06	5.0797e-06	3.18616e-06	5.39102e-06	0	3.11912e-06
883	3.2836e-06	2.89631e-06	1.99702e-06	5.0797e-06	3.18616e-06	4.94177e-06	0	3.05494e-06
884	3.2836e-06	2.4136e-06	1.42644e-06	3.97542e-06	3.18616e-06	4.49252e-06	0	2.68253e-06
885	3.2836e-06	2.4136e-06	1.42644e-06	4.08585e-06	3.18616e-06	4.49252e-06	0	2.69831e-06
886	2.7363e-06	9.65438e-07	1.14115e-06	2.76071e-06	1.59308e-06	2.69551e-06	0	1.69889e-06
887	2.7363e-06	9.65438e-07	1.42644e-06	3.31285e-06	1.59308e-06	2.69551e-06	0	1.81852e-06
888	2.7363e-06	9.65438e-07	1.42644e-06	2.87114e-06	1.59308e-06	2.54576e-06	0	1.73403e-06
889	2.4627e-06	4.82719e-07	1.42644e-06	2.20857e-06	1.59308e-06	2.39601e-06	0	1.50993e-06
890	2.7363e-06	9.65438e-07	1.99702e-06	2.65028e-06	2.38962e-06	2.84526e-06	0	1.94056e-06
891	3.01e-06	9.65438e-07	1.99702e-06	2.65028e-06	2.38962e-06	2.84526e-06	0	1.97965e-06
892	3.2836e-06	9.65438e-07	1.99702e-06	2.65028e-06	4.77924e-06	3.29451e-06	0	2.4243e-06
893	2.7363e-06	9.65438e-07	1.99702e-06	2.53985e-06	4.77924e-06	3.14476e-06	0	2.30895e-06
894	5.7463e-06	2.4136e-06	2.85288e-06	4.52756e-06	4.77924e-06	5.24127e-06	0	3.65155e-06
895	5.7463e-06	2.4136e-06	2.85288e-06	4.63799e-06	4.77924e-06	5.24127e-06	0	3.66732e-06
896	5.7463e-06	2.4136e-06	2.85288e-06	4.63799e-06	4.77924e-06	5.24127e-06	0	3.66732e-06
897	5.7463e-06	2.4136e-06	2.85288e-06	4.63799e-06	4.77924e-06	5.24127e-06	0	3.66732e-06
898	5.7463e-06	2.4136e-06	2.56759e-06	4.74842e-06	4.77924e-06	4.94177e-06	0	3.59956e-06
899	5.4726e-06	2.4136e-06	2.28231e-06	4.63799e-06	5.57578e-06	4.94177e-06	0	3.61773e-06
900	4.9254e-06	3.37903e-06	2.28231e-06	4.74842e-06	5.57578e-06	4.79202e-06	0	3.67185e-06
901	4.3781e-06	2.89631e-06	1.99702e-06	4.52756e-06	5.57578e-06	3.44426e-06	0	3.25987e-06
902	8.7562e-06	1.15853e-05	1.25527e-05	2.07605e-05	2.54893e-05	2.57571e-05	0	1.49859e-05
903	8.7562e-06	1.25507e-05	1.2838e-05	2.18648e-05	2.62858e-05	2.63561e-05	0	1.55217e-05
904	8.7562e-06	1.25507e-05	1.2838e-05	2.18648e-05	2.62858e-05	2.63561e-05	0	1.55217e-05
905	8.7562e-06	1.25507e-05	1.2838e-05	2.17544e-05	2.62858e-05	2.63561e-05	0	1.55059e-05
906	9.3035e-06	1.25507e-05	1.2838e-05	2.23065e-05	2.62858e-05	2.74044e-05	0	1.58127e-05
907	9.3035e-06	1.25507e-05	1.2838e-05	2.24169e-05	2.70824e-05	2.74044e-05	0	1.59423e-05
908	1.204e-05	2.12396e-05	1.76879e-05	3.25764e-05	4.22166e-05	3.57904e-05	0	2.30787e-05
909	1.204e-05	2.17224e-05	1.76879e-05	3.26868e-05	4.22166e-05	3.63894e-05	0	2.3249e-05
910	1.2861e-05	2.26878e-05	1.93996e-05	3.64413e-05	4.61993e-05	3.89352e-05	0	2.52177e-05
911	1.3134e-05	2.26878e-05	1.93996e-05	3.64413e-05	4.69959e-05	3.95342e-05	0	2.54562e-05
912	1.2861e-05	2.26878e-05	1.93996e-05	3.67726e-05	4.69959e-05	3.96839e-05	0	2.54858e-05
913	1.204e-05	2.22051e-05	1.93996e-05	3.61101e-05	4.54028e-05	3.90849e-05	0	2.48918e-05
914	3.6667e-05	3.52385e-05	4.30785e-05	6.61466e-05	6.69093e-05	6.94843e-05	1.9681e-05	4.81721e-05
915	3.8582e-05	3.81348e-05	4.67873e-05	6.9349e-05	6.77059e-05	7.15808e-05	1.9681e-05	5.02601e-05
916	3.8582e-05	3.91003e-05	4.79284e-05	7.07845e-05	6.77059e-05	7.14311e-05	2.6241e-05	5.16819e-05
917	3.9677e-05	3.91003e-05	4.90696e-05	7.23305e-05	6.77059e-05	7.39768e-05	2.6241e-05	5.25858e-05
918	3.9403e-05	3.91003e-05	4.96402e-05	7.23305e-05	6.77059e-05	7.39768e-05	2.6241e-05	5.26282e-05
919	3.8309e-05	3.81348e-05	4.96402e-05	7.1668e-05	6.53163e-05	7.36773e-05	2.6241e-05	5.18551e-05
920	4.2687e-05	4.24793e-05	5.22077e-05	8.60237e-05	6.85024e-05	8.74544e-05	3.2801e-05	5.88793e-05
921	4.296e-05	4.2962e-05	5.22077e-05	8.93365e-05	6.85024e-05	8.98504e-05	3.2801e-05	5.98029e-05
922	4.1045e-05	4.00657e-05	4.76431e-05	8.71279e-05	6.45197e-05	8.47589e-05	3.2801e-05	5.68516e-05
923	5.801e-05	5.79263e-05	6.16223e-05	0.000135496	7.64678e-05	0.000128336	5.2482e-05	8.14771e-05
924	5.7736e-05	5.79263e-05	6.16223e-05	0.000137262	7.64678e-05	0.000129085	5.2482e-05	8.17974e-05
925	5.8284e-05	5.79263e-05	6.16223e-05	0.000139361	7.64678e-05	0.000131032	5.2482e-05	8.24535e-05
926	5.8284e-05	5.79263e-05	6.16223e-05	0.000139471	7.64678e-05	0.000131481	5.2482e-05	8.25334e-05
927	5.801e-05	5.74436e-05	6.10517e-05	0.000139029	7.40782e-05	0.000131781	5.2482e-05	8.19822e-05
928	5.801e-05	5.74436e-05	6.1337e-05	0.00013925	7.40782e-05	0.000132679	5.2482e-05	8.21828e-05
929	5.8284e-05	5.74436e-05	6.1337e-05	0.00013914	7.40782e-05	0.000132529	5.9042e-05	8.31219e-05
930	5.8284e-05	5.74436e-05	6.1337e-05	0.000138698	7.32817e-05	0.000131781	5.9042e-05	8.28381e-05
931	5.801e-05	5.74436e-05	6.10517e-05	0.000138367	7.16886e-05	0.000131631	5.9042e-05	8.24619e-05
932	5.801e-05	5.74436e-05	6.10517e-05	0.000138367	7.0892e-05	0.000131331	5.9042e-05	8.23053e-05
933	5.7736e-05	5.69609e-05	6.07664e-05	0.000138035	7.00955e-05	0.000129984	5.9042e-05	8.18029e-05
934	5.2811e-05	5.30991e-05	5.44901e-05	0.000133508	6.9299e-05	0.000125192	5.9042e-05	7.82058e-05
935	5.199e-05	5.21337e-05	5.2493e-05	0.000132183	6.85024e-05	0.000123694	5.9042e-05	7.71483e-05
936	5.0348e-05	5.16509e-05	4.96402e-05	0.000127213	6.53163e-05	0.000119501	5.9042e-05	7.46732e-05
937	3.7761e-05	4.44102e-05	3.73728e-05	0.000110207	5.17751e-05	0.000103777	5.2482e-05	6.25408e-05
938	2.5995e-05	2.99286e-05	1.93996e-05	8.45881e-05	2.071e-05	7.99668e-05	3.9361e-05	4.28499e-05
939	3.01e-05	3.57212e-05	2.93847e-05	9.76186e-05	3.50478e-05	9.95842e-05	3.9361e-05	5.24025e-05
940	3.01e-05	3.57212e-05	2.93847e-05	9.77291e-05	3.50478e-05	9.95842e-05	3.9361e-05	5.24183e-05
941	2.9826e-05	3.57212e-05	2.88141e-05	9.67352e-05	3.50478e-05	9.83862e-05	3.9361e-05	5.19845e-05
942	2.7637e-05	3.37903e-05	2.79582e-05	9.41953e-05	3.50478e-05	9.77872e-05	3.9361e-05	5.08253e-05
943	1.9975e-05	2.70323e-05	2.25378e-05	7.11158e-05	3.34547e-05	7.89186e-05	2.6241e-05	3.98965e-05
944	2.7363e-05	3.28249e-05	3.25229e-05	8.22691e-05	4.54028e-05	9.44927e-05	3.2801e-05	4.96681e-05
945	2.7363e-05	3.18595e-05	3.28081e-05	8.18274e-05	4.54028e-05	9.44927e-05	3.2801e-05	4.95078e-05
946	2.6269e-05	3.0894e-05	3.1667e-05	7.85145e-05	4.38097e-05	9.10484e-05	3.2801e-05	4.78576e-05
947	2.6542e-05	3.0894e-05	3.19523e-05	7.85145e-05	4.46062e-05	9.10484e-05	3.2801e-05	4.80513e-05
948	2.6269e-05	2.99286e-05	3.08111e-05	7.67477e-05	4.38097e-05	8.94011e-05	3.2801e-05	4.71097e-05
949	1.8607e-05	2.26878e-05	2.56759e-05	4.74842e-05	3.74374e-05	6.04993e-05	2.6241e-05	3.40903e-05
950	1.9702e-05	2.31705e-05	2.68171e-05	4.9251e-05	4.22166e-05	6.45425e-05	2.6241e-05	3.59915e-05
951	1.9975e-05	2.31705e-05	2.71024e-05	4.86989e-05	4.30132e-05	6.3644e-05	2.6241e-05	3.59779e-05
952	1.5597e-05	1.93088e-05	2.48201e-05	3.66622e-05	4.06235e-05	5.2862e-05	1.312e-05	2.89991e-05
953	1.5871e-05	1.97915e-05	2.56759e-05	3.74352e-05	4.14201e-05	5.39102e-05	1.312e-05	2.96034e-05
954	1.5871e-05	1.97915e-05	2.56759e-05	3.73248e-05	4.14201e-05	5.39102e-05	1.312e-05	2.95877e-05
955	1.5871e-05	1.97915e-05	2.56759e-05	3.71039e-05	4.14201e-05	5.39102e-05	1.312e-05	2.95561e-05
956	1.5871e-05	1.8826e-05	2.56759e-05	3.64413e-05	4.14201e-05	5.3461e-05	1.312e-05	2.92594e-05
957	1.6418e-05	1.8826e-05	2.68171e-05	3.66622e-05	4.14201e-05	5.39102e-05	1.312e-05	2.95963e-05
958	1.6418e-05	1.83433e-05	2.53907e-05	3.61101e-05	4.06235e-05	5.25625e-05	1.312e-05	2.89383e-05
959	1.5871e-05	1.83433e-05	2.56759e-05	3.63309e-05	4.06235e-05	5.24127e-05	1.312e-05	2.89111e-05
960	1.5597e-05	1.68952e-05	2.48201e-05	3.52266e-05	4.06235e-05	5.09152e-05	1.312e-05	2.81712e-05
961	1.5323e-05	1.59297e-05	2.36789e-05	3.39015e-05	3.9827e-05	4.9268e-05	1.312e-05	2.72927e-05
962	1.4503e-05	1.49643e-05	2.13966e-05	3.05886e-05	3.74374e-05	4.53744e-05	1.312e-05	2.53406e-05
963	5.7463e-06	9.65438e-06	1.25527e-05	1.67851e-05	2.38962e-05	2.56074e-05	1.312e-05	1.53375e-05
964	3.5572e-06	3.86175e-06	5.99105e-06	7.3987e-06	1.11516e-05	1.09318e-05	6.5602e-06	7.06461e-06
965	4.1045e-06	6.27535e-06	5.99105e-06	9.49683e-06	1.11516e-05	1.18303e-05	0	6.97851e-06
966	4.1045e-06	6.27535e-06	5.99105e-06	9.38641e-06	1.11516e-05	1.1381e-05	0	6.89856e-06
967	3.01e-06	3.86175e-06	4.8499e-06	7.72998e-06	7.9654e-06	9.43429e-06	0	5.26447e-06
968	3.5572e-06	6.75807e-06	9.98509e-06	1.10428e-05	8.76194e-06	1.43761e-05	0	7.78303e-06
969	3.5572e-06	8.20623e-06	1.02704e-05	1.19263e-05	7.9654e-06	1.45258e-05	0	8.06447e-06
970	2.4627e-06	8.20623e-06	8.84394e-06	1.03803e-05	5.57578e-06	1.22796e-05	0	6.82121e-06
971	3.5572e-06	1.06198e-05	1.05557e-05	1.42453e-05	7.16886e-06	1.67721e-05	0	8.98841e-06
972	3.8309e-06	1.11025e-05	1.11262e-05	1.45765e-05	7.16886e-06	1.73711e-05	0	9.31087e-06
973	3.8309e-06	1.15853e-05	1.11262e-05	1.40244e-05	7.16886e-06	1.72213e-05	0	9.27956e-06
974	1.0398e-05	1.59297e-05	2.05408e-05	2.03188e-05	9.55848e-06	2.62064e-05	0	1.47075e-05
975	1.0672e-05	1.59297e-05	2.11113e-05	2.09814e-05	8.76194e-06	2.63561e-05	0	1.48303e-05
976	1.1219e-05	1.59297e-05	2.16819e-05	2.16439e-05	8.76194e-06	2.66556e-05	0	1.51274e-05
977	1.1219e-05	1.59297e-05	2.19672e-05	2.17544e-05	8.76194e-06	2.68054e-05	0	1.52054e-05
978	1.1219e-05	1.59297e-05	2.19672e-05	2.17544e-05	8.76194e-06	2.68054e-05	0	1.52054e-05
979	1.1219e-05	1.59297e-05	2.19672e-05	2.16439e-05	8.76194e-06	2.68054e-05	0	1.51896e-05
980	1.1219e-05	1.59297e-05	2.19672e-05	2.16439e-05	8.76194e-06	2.68054e-05	0	1.51896e-05
981	1.1219e-05	1.59297e-05	2.19672e-05	2.16439e-05	8.76194e-06	2.68054e-05	0	1.51896e-05
982	1.0945e-05	1.59297e-05	2.13966e-05	2.12022e-05	8.76194e-06	2.65059e-05	0	1.49631e-05
983	1.0945e-05	1.59297e-05	2.13966e-05	2.10918e-05	8.76194e-06	2.63561e-05	0	1.49259e-05
984	1.0945e-05	1.59297e-05	2.13966e-05	2.10918e-05	8.76194e-06	2.63561e-05	0	1.49259e-05
985	1.0672e-05	1.59297e-05	2.13966e-05	2.07605e-05	7.9654e-06	2.62064e-05	0	1.47043e-05
986	1.0672e-05	1.59297e-05	2.13966e-05	2.05397e-05	7.9654e-06	2.60566e-05	0	1.46514e-05
987	1.0672e-05	1.59297e-05	2.05408e-05	2.03188e-05	7.9654e-06	2.56074e-05	0	1.44334e-05
988	1.0672e-05	1.25507e-05	1.8829e-05	1.87728e-05	7.9654e-06	2.44094e-05	0	1.33141e-05
989	1.0672e-05	1.25507e-05	1.8829e-05	1.87728e-05	7.9654e-06	2.44094e-05	0	1.33141e-05
990	9.0299e-06	1.15853e-05	1.76879e-05	1.64538e-05	5.57578e-06	2.18636e-05	0	1.17423e-05
991	8.7562e-06	9.65438e-06	1.6832e-05	1.53495e-05	5.57578e-06	1.91681e-05	0	1.07623e-05
992	8.7562e-06	9.65438e-06	1.6832e-05	1.52391e-05	5.57578e-06	1.91681e-05	0	1.07465e-05
993	8.7562e-06	9.65438e-06	1.65467e-05	1.47974e-05	5.57578e-06	1.88686e-05	0	1.05999e-05
994	8.7562e-06	9.65438e-06	1.56909e-05	1.44661e-05	5.57578e-06	1.84193e-05	0	1.03661e-05
995	7.9353e-06	7.72351e-06	1.05557e-05	1.17054e-05	3.9827e-06	1.48253e-05	0	8.10399e-06
996	6.8408e-06	5.79263e-06	9.41451e-06	9.60726e-06	3.9827e-06	1.15308e-05	0	6.73839e-06
997	2.7363e-06	1.93088e-06	4.8499e-06	4.3067e-06	7.9654e-07	4.94177e-06	0	2.79459e-06
998	2.7363e-06	1.93088e-06	4.56461e-06	4.41713e-06	0	5.09152e-06	6.5602e-06	3.61438e-06
999	2.7363e-06	1.93088e-06	4.56461e-06	4.41713e-06	0	5.09152e-06	6.5602e-06	3.61438e-06
1000	2.4627e-06	1.93088e-06	4.56461e-06	4.3067e-06	0	4.94177e-06	6.5602e-06	3.53812e-06
1001	5.4726e-07	4.82719e-07	1.71173e-06	1.10428e-06	0	1.34776e-06	6.5602e-06	1.67914e-06
1002	5.4726e-07	3.86175e-06	1.71173e-06	1.21471e-06	0	1.79701e-06	6.5602e-06	2.24181e-06
1003	5.4726e-07	3.86175e-06	1.71173e-06	9.93855e-07	0	1.64726e-06	6.5602e-06	2.18887e-06
1004	5.4726e-07	3.86175e-06	1.42644e-06	1.10428e-06	7.9654e-07	1.64726e-06	6.5602e-06	2.27768e-06
1005	5.4726e-07	6.27535e-06	1.14115e-06	1.43557e-06	7.9654e-07	2.24626e-06	6.5602e-06	2.71462e-06
1006	5.4726e-07	6.27535e-06	1.14115e-06	1.43557e-06	7.9654e-07	2.24626e-06	6.5602e-06	2.71462e-06
1007	5.4726e-07	8.20623e-06	1.71173e-06	1.546e-06	7.9654e-07	2.69551e-06	6.5602e-06	3.15193e-06
1008	5.4726e-07	8.20623e-06	1.71173e-06	1.546e-06	7.9654e-07	2.69551e-06	6.5602e-06	3.15193e-06
1009	2.7363e-07	8.20623e-06	1.42644e-06	1.21471e-06	7.9654e-07	2.39601e-06	6.5602e-06	2.98197e-06
1010	5.4726e-07	9.17166e-06	1.42644e-06	1.43557e-06	7.9654e-07	2.69551e-06	6.5602e-06	3.23332e-06
1011	5.4726e-07	9.17166e-06	1.42644e-06	1.32514e-06	7.9654e-07	2.69551e-06	6.5602e-06	3.21754e-06
1012	5.4726e-07	9.17166e-06	1.42644e-06	1.32514e-06	7.9654e-07	2.69551e-06	6.5602e-06	3.21754e-06
1013	5.4726e-07	9.17166e-06	5.70576e-07	1.32514e-06	7.9654e-07	2.54576e-06	6.5602e-06	3.07388e-06
1014	1.0945e-06	9.65438e-06	5.70576e-07	1.65642e-06	7.9654e-07	2.99501e-06	6.5602e-06	3.33253e-06
1015	1.0945e-06	9.65438e-06	5.70576e-07	1.65642e-06	1.59308e-06	2.99501e-06	6.5602e-06	3.44632e-06
1016	2.1891e-06	1.15853e-05	1.71173e-06	3.31285e-06	2.38962e-06	5.39102e-06	6.5602e-06	4.73425e-06
1017	2.1891e-06	1.15853e-05	1.71173e-06	3.42328e-06	2.38962e-06	5.69052e-06	6.5602e-06	4.79281e-06
1018	2.1891e-06	1.15853e-05	1.71173e-06	3.42328e-06	2.38962e-06	5.69052e-06	6.5602e-06	4.79281e-06
1019	2.4627e-06	1.15853e-05	1.71173e-06	3.53371e-06	2.38962e-06	5.99003e-06	6.5602e-06	4.89046e-06
1020	2.4627e-06	1.15853e-05	1.71173e-06	3.64413e-06	2.38962e-06	5.99003e-06	6.5602e-06	4.90624e-06
1021	2.4627e-06	1.15853e-05	1.71173e-06	3.64413e-06	2.38962e-06	5.99003e-06	6.5602e-06	4.90624e-06
1022	2.4627e-06	1.15853e-05	1.71173e-06	3.64413e-06	2.38962e-06	5.84027e-06	6.5602e-06	4.88485e-06
1023	2.4627e-06	1.15853e-05	1.71173e-06	3.64413e-06	2.38962e-06	5.84027e-06	6.5602e-06	4.88485e-06
1024	2.4627e-06	1.11025e-05	1.71173e-06	3.64413e-06	2.38962e-06	5.84027e-06	6.5602e-06	4.81589e-06
1025	2.4627e-06	1.11025e-05	1.71173e-06	3.53371e-06	2.38962e-06	5.84027e-06	6.5602e-06	4.80011e-06
1026	2.1891e-06	4.34447e-06	1.42644e-06	2.87114e-06	2.38962e-06	4.94177e-06	6.5602e-06	3.53182e-06
1027	2.1891e-06	3.86175e-06	1.42644e-06	2.87114e-06	2.38962e-06	4.94177e-06	6.5602e-06	3.46286e-06
1028	2.1891e-06	3.37903e-06	1.42644e-06	2.76071e-06	2.38962e-06	4.79202e-06	6.5602e-06	3.35673e-06
1029	1.9154e-06	2.4136e-06	1.42644e-06	2.65028e-06	1.59308e-06	4.19302e-06	6.5602e-06	2.96458e-06
1030	2.1891e-06	2.4136e-06	1.42644e-06	3.20242e-06	1.59308e-06	5.99003e-06	6.5602e-06	3.33926e-06
1031	2.1891e-06	2.4136e-06	1.42644e-06	3.20242e-06	1.59308e-06	5.99003e-06	6.5602e-06	3.33926e-06
1032	2.1891e-06	2.4136e-06	1.42644e-06	3.20242e-06	1.59308e-06	6.13978e-06	6.5602e-06	3.36066e-06
1033	2.1891e-06	2.4136e-06	1.42644e-06	3.20242e-06	1.59308e-06	5.84027e-06	6.5602e-06	3.31787e-06
1034	2.1891e-06	2.4136e-06	1.71173e-06	3.42328e-06	1.59308e-06	5.99003e-06	6.5602e-06	3.41157e-06
1035	2.1891e-06	2.4136e-06	1.71173e-06	3.42328e-06	1.59308e-06	5.99003e-06	6.5602e-06	3.41157e-06
1036	1.9154e-06	1.93088e-06	1.71173e-06	3.20242e-06	1.59308e-06	5.99003e-06	6.5602e-06	3.27197e-06
1037	1.9154e-06	1.44816e-06	1.71173e-06	2.98156e-06	1.59308e-06	5.39102e-06	6.5602e-06	3.08589e-06
1038	2.1891e-06	1.44816e-06	1.99702e-06	3.53371e-06	1.59308e-06	5.39102e-06	6.5602e-06	3.24461e-06
1039	2.1891e-06	1.44816e-06	1.71173e-06	3.20242e-06	1.59308e-06	5.09152e-06	6.5602e-06	3.11374e-06
1040	2.1891e-06	1.93088e-06	1.42644e-06	3.20242e-06	1.59308e-06	5.09152e-06	6.5602e-06	3.14195e-06
1041	1.6418e-06	1.44816e-06	1.14115e-06	2.31899e-06	1.59308e-06	3.59402e-06	6.5602e-06	2.61392e-06
1042	2.7363e-06	2.4136e-06	5.13519e-06	6.07356e-06	6.37232e-06	8.08653e-06	6.5602e-06	5.33968e-06
1043	3.01e-06	2.4136e-06	5.42048e-06	6.07356e-06	8.76194e-06	7.93678e-06	6.5602e-06	5.7395e-06
1044	3.01e-06	2.4136e-06	5.42048e-06	6.29441e-06	8.76194e-06	7.93678e-06	6.5602e-06	5.77105e-06
1045	2.1891e-06	2.4136e-06	5.13519e-06	6.18399e-06	8.76194e-06	7.48753e-06	6.5602e-06	5.53307e-06
1046	2.4627e-06	2.4136e-06	6.27634e-06	6.95698e-06	9.55848e-06	8.08653e-06	6.5602e-06	6.04498e-06
1047	3.01e-06	1.93088e-06	6.56163e-06	7.50912e-06	9.55848e-06	8.23628e-06	6.5602e-06	6.19522e-06
1048	3.2836e-06	1.93088e-06	6.56163e-06	7.50912e-06	8.76194e-06	8.23628e-06	6.5602e-06	6.12052e-06
1049	1.0945e-05	1.39989e-05	3.30934e-05	2.83801e-05	5.17751e-05	3.47421e-05	2.6241e-05	2.84537e-05
1050	1.1493e-05	1.39989e-05	3.33787e-05	2.89322e-05	5.17751e-05	3.56407e-05	2.6241e-05	2.87799e-05
1051	1.1766e-05	1.44816e-05	3.33787e-05	2.89322e-05	5.17751e-05	3.56407e-05	2.6241e-05	2.88879e-05
1052	1.1766e-05	1.44816e-05	3.33787e-05	2.89322e-05	5.17751e-05	3.59402e-05	2.6241e-05	2.89307e-05
1053	1.1766e-05	1.44816e-05	3.33787e-05	2.90426e-05	5.17751e-05	3.57904e-05	2.6241e-05	2.89251e-05
1054	1.1766e-05	1.49643e-05	3.33787e-05	2.92635e-05	5.17751e-05	3.59402e-05	2.6241e-05	2.9047e-05
1055	1.1766e-05	1.49643e-05	3.33787e-05	2.92635e-05	5.17751e-05	3.59402e-05	2.6241e-05	2.9047e-05
1056	1.2313e-05	1.49643e-05	3.33787e-05	2.92635e-05	5.17751e-05	3.59402e-05	2.6241e-05	2.91252e-05
1057	1.2313e-05	1.49643e-05	3.33787e-05	2.90426e-05	5.17751e-05	3.54909e-05	1.9681e-05	2.80923e-05
1058	1.2313e-05	1.49643e-05	3.33787e-05	2.89322e-05	5.17751e-05	3.54909e-05	1.9681e-05	2.80765e-05
1059	1.3408e-05	1.73779e-05	3.42346e-05	3.02574e-05	5.57578e-05	3.71382e-05	1.9681e-05	2.96935e-05
1060	1.3408e-05	1.73779e-05	3.3664e-05	3.02574e-05	5.57578e-05	3.71382e-05	1.9681e-05	2.9612e-05
1061	1.3408e-05	1.8826e-05	3.22376e-05	2.94844e-05	5.57578e-05	3.65392e-05	1.9681e-05	2.94191e-05
1062	2.6269e-05	4.6341e-05	5.90547e-05	4.99136e-05	8.60263e-05	5.96008e-05	5.2482e-05	5.4241e-05
1063	3.01e-05	5.21337e-05	6.61869e-05	5.51037e-05	9.31952e-05	6.49918e-05	5.9042e-05	6.01075e-05
1064	3.01e-05	5.26164e-05	6.70427e-05	5.4662e-05	9.47882e-05	6.52913e-05	6.5602e-05	6.14432e-05
1065	5.4453e-05	9.26821e-05	9.55716e-05	8.32629e-05	0.000133819	9.26956e-05	0.00014432	9.95441e-05
1066	5.5821e-05	9.60611e-05	9.72833e-05	8.63549e-05	0.000136208	9.43429e-05	0.00014432	0.000101485
1067	5.5821e-05	9.60611e-05	9.75686e-05	8.66862e-05	0.000136208	9.41931e-05	0.00014432	0.000101552
1068	5.6095e-05	9.65438e-05	9.75686e-05	8.74592e-05	0.000136208	9.43429e-05	0.00014432	0.000101792
1069	5.6095e-05	9.70265e-05	9.72833e-05	8.65758e-05	0.000136208	9.35941e-05	0.00014432	0.000101587
1070	5.6095e-05	9.70265e-05	9.72833e-05	8.65758e-05	0.000136208	9.35941e-05	0.00014432	0.000101587
1071	5.6095e-05	9.65438e-05	9.72833e-05	8.63549e-05	0.000136208	9.34444e-05	0.00014432	0.000101465
1072	5.4726e-05	9.65438e-05	9.5001e-05	8.52507e-05	0.000134615	9.11981e-05	0.00014432	0.000100237
1073	5.4179e-05	9.65438e-05	9.35745e-05	8.35942e-05	0.000134615	8.94011e-05	0.00014432	9.94618e-05
1074	5.3632e-05	9.65438e-05	9.15775e-05	8.39255e-05	0.000132226	8.91016e-05	0.00014432	9.87615e-05
1075	5.1169e-05	9.50957e-05	8.64423e-05	7.88458e-05	0.00012426	8.26624e-05	0.00013776	9.37486e-05
1076	5.8284e-05	9.75093e-05	8.84394e-05	8.81218e-05	0.000125853	9.00001e-05	0.00013776	9.7996e-05
1077	5.8284e-05	9.84747e-05	8.87246e-05	8.80114e-05	0.00012665	9.05991e-05	0.00013776	9.83583e-05
1078	5.8284e-05	9.84747e-05	8.87246e-05	8.82322e-05	0.00012665	9.04494e-05	0.00013776	9.83684e-05
1079	5.8284e-05	9.7992e-05	8.95805e-05	8.86739e-05	0.000125853	9.07489e-05	0.00013776	9.84138e-05
1080	5.6642e-05	9.4613e-05	8.70129e-05	8.66862e-05	0.000121871	8.80534e-05	0.00013776	9.60918e-05
1081	5.6642e-05	9.31648e-05	8.67276e-05	8.77905e-05	0.000121871	8.82031e-05	0.00013776	9.60233e-05
1082	5.6642e-05	9.31648e-05	8.64423e-05	8.79009e-05	0.000121871	8.76041e-05	0.00013776	9.59127e-05
1083	5.6368e-05	9.26821e-05	8.53012e-05	8.69071e-05	0.000120278	8.67056e-05	0.00013776	9.51438e-05
1084	5.5547e-05	9.17166e-05	8.47306e-05	8.63549e-05	0.000120278	8.56574e-05	0.0001312	9.36413e-05
1085	3.4751e-05	4.92374e-05	4.13668e-05	5.84166e-05	6.37232e-05	5.0466e-05	5.9042e-05	5.10004e-05
1086	3.5299e-05	5.8409e-05	4.33638e-05	6.6257e-05	6.53163e-05	5.66057e-05	5.2482e-05	5.39617e-05
1087	3.5299e-05	5.88917e-05	4.27932e-05	6.60361e-05	6.45197e-05	5.61565e-05	5.2482e-05	5.37397e-05
1088	3.5299e-05	5.79263e-05	4.25079e-05	6.63674e-05	6.45197e-05	5.66057e-05	5.2482e-05	5.36725e-05
1089	3.393e-05	5.26164e-05	4.05109e-05	6.4711e-05	6.13336e-05	5.42097e-05	4.5922e-05	5.04619e-05
1090	2.4627e-05	3.9583e-05	3.10964e-05	5.73123e-05	5.0182e-05	4.82197e-05	3.9361e-05	4.14831e-05
1091	2.3532e-05	3.81348e-05	2.90994e-05	5.59872e-05	4.77924e-05	4.88187e-05	2.6241e-05	3.85151e-05
1092	1.5597e-05	2.4136e-05	1.56909e-05	3.88708e-05	2.30997e-05	3.42929e-05	6.5602e-06	2.26068e-05
1093	1.7239e-05	2.4136e-05	1.76879e-05	4.17419e-05	2.30997e-05	3.60899e-05	6.5602e-06	2.37935e-05
1094	1.7239e-05	2.31705e-05	1.65467e-05	4.13002e-05	2.30997e-05	3.53411e-05	6.5602e-06	2.33225e-05
1095	1.5871e-05	2.22051e-05	1.51203e-05	3.90916e-05	2.071e-05	3.20466e-05	6.5602e-06	2.16578e-05
1096	9.5771e-06	1.68952e-05	1.19821e-05	3.04782e-05	1.0355e-05	2.36606e-05	6.5602e-06	1.56441e-05
1097	1.0398e-05	1.8826e-05	1.31233e-05	3.22451e-05	1.19481e-05	2.57571e-05	6.5602e-06	1.69797e-05
1098	1.0398e-05	1.8826e-05	1.31233e-05	3.16929e-05	1.19481e-05	2.56074e-05	6.5602e-06	1.68794e-05
1099	6.2935e-06	1.64125e-05	1.16968e-05	2.55089e-05	7.16886e-06	2.15641e-05	6.5602e-06	1.36007e-05
1100	6.2935e-06	1.64125e-05	1.14115e-05	2.52881e-05	7.16886e-06	2.14143e-05	0	1.25698e-05
1101	5.4726e-06	1.5447e-05	9.41451e-06	2.23065e-05	4.77924e-06	1.85691e-05	0	1.08556e-05
1102	5.7463e-06	1.59297e-05	9.6998e-06	2.38525e-05	5.57578e-06	1.93178e-05	0	1.1446e-05
1103	5.7463e-06	1.59297e-05	9.12922e-06	2.38525e-05	5.57578e-06	1.94676e-05	0	1.13859e-05
1104	6.0199e-06	1.59297e-05	9.12922e-06	2.40734e-05	5.57578e-06	2.00666e-05	0	1.15421e-05
1105	4.9254e-06	1.2068e-05	7.41749e-06	2.05397e-05	4.77924e-06	1.64726e-05	0	9.45748e-06
1106	7.3881e-06	1.25507e-05	7.98807e-06	2.59507e-05	4.77924e-06	2.15641e-05	0	1.14601e-05
1107	7.3881e-06	1.25507e-05	7.98807e-06	2.60611e-05	4.77924e-06	2.15641e-05	0	1.14759e-05
1108	7.6617e-06	1.25507e-05	7.98807e-06	2.59507e-05	4.77924e-06	2.15641e-05	0	1.14992e-05
1109	7.6617e-06	1.25507e-05	7.98807e-06	2.57298e-05	4.77924e-06	2.14143e-05	0	1.14463e-05
1110	7.1144e-06	1.15853e-05	6.56163e-06	2.18648e-05	3.18616e-06	1.84193e-05	0	9.8188e-06
1111	7.1144e-06	1.06198e-05	6.56163e-06	2.10918e-05	3.18616e-06	1.78203e-05	0	9.48488e-06
1112	4.6518e-06	4.34447e-06	3.42346e-06	1.21471e-05	2.38962e-06	1.21298e-05	0	5.58375e-06
1113	6.0199e-06	1.35161e-05	6.84692e-06	1.61225e-05	9.55848e-06	1.64726e-05	0	9.79094e-06
1114	6.2935e-06	1.5447e-05	7.70278e-06	1.68955e-05	9.55848e-06	1.70716e-05	0	1.04241e-05
1115	6.2935e-06	1.97915e-05	7.98807e-06	1.73372e-05	9.55848e-06	1.78203e-05	0	1.12556e-05
1116	9.0299e-06	2.46187e-05	9.12922e-06	1.98771e-05	1.43377e-05	2.08153e-05	0	1.39726e-05
1117	8.209e-06	2.60668e-05	8.55865e-06	1.83311e-05	1.35412e-05	1.88686e-05	0	1.33679e-05
1118	1.6418e-05	4.58583e-05	1.39791e-05	2.57298e-05	2.071e-05	2.66556e-05	1.312e-05	2.32102e-05
1119	1.6418e-05	4.58583e-05	1.39791e-05	2.57298e-05	2.071e-05	2.63561e-05	1.312e-05	2.31674e-05
1120	1.6965e-05	4.73065e-05	1.4835e-05	2.65028e-05	2.30997e-05	2.68054e-05	1.312e-05	2.40907e-05
1121	2.6269e-05	5.02028e-05	1.99702e-05	4.14106e-05	3.34547e-05	4.08819e-05	2.6241e-05	3.40614e-05
1122	2.6542e-05	5.02028e-05	1.99702e-05	4.16315e-05	3.34547e-05	4.13312e-05	2.6241e-05	3.41962e-05
1123	2.6542e-05	5.02028e-05	1.99702e-05	4.18523e-05	3.34547e-05	4.14809e-05	2.6241e-05	3.42492e-05
1124	2.6542e-05	4.97201e-05	2.02555e-05	4.19628e-05	3.34547e-05	4.13312e-05	2.6241e-05	3.42153e-05
1125	2.5721e-05	4.97201e-05	1.99702e-05	4.04168e-05	3.34547e-05	4.05824e-05	2.6241e-05	3.37295e-05
1126	3.7214e-05	6.08226e-05	2.90994e-05	5.22326e-05	3.90305e-05	5.4659e-05	3.9361e-05	4.46313e-05
1127	3.8582e-05	6.08226e-05	3.02406e-05	5.35577e-05	3.90305e-05	5.63062e-05	4.5922e-05	4.63516e-05
1128	4.1866e-05	6.1788e-05	3.22376e-05	5.6981e-05	4.14201e-05	5.78037e-05	6.5602e-05	5.10998e-05
1129	4.2139e-05	6.27535e-05	3.30934e-05	5.48829e-05	4.14201e-05	5.66057e-05	6.5602e-05	5.09282e-05
1130	5.0075e-05	7.19252e-05	3.96551e-05	6.32754e-05	4.85889e-05	6.51415e-05	6.5602e-05	5.77519e-05
1131	5.1169e-05	7.33733e-05	4.07962e-05	6.43797e-05	4.85889e-05	6.604e-05	6.5602e-05	5.85642e-05
1132	5.1169e-05	7.33733e-05	4.07962e-05	6.43797e-05	4.85889e-05	6.604e-05	6.5602e-05	5.85642e-05
1133	5.1169e-05	7.28906e-05	4.07962e-05	6.43797e-05	4.85889e-05	6.61898e-05	6.5602e-05	5.85167e-05
1134	5.1169e-05	7.24079e-05	4.07962e-05	6.42693e-05	4.85889e-05	6.61898e-05	6.5602e-05	5.84319e-05
1135	5.1169e-05	7.09597e-05	4.05109e-05	6.42693e-05	4.85889e-05	6.604e-05	6.5602e-05	5.81629e-05
1136	5.1169e-05	7.09597e-05	3.99404e-05	6.42693e-05	4.85889e-05	6.58903e-05	6.5602e-05	5.806e-05
1137	4.597e-05	5.74436e-05	3.48052e-05	6.1619e-05	4.38097e-05	6.1847e-05	5.9042e-05	5.20767e-05
1138	4.3781e-05	5.02028e-05	3.30934e-05	5.88583e-05	4.38097e-05	5.97505e-05	5.9042e-05	4.97911e-05
1139	6.2935e-05	6.08226e-05	5.27783e-05	7.12263e-05	6.53163e-05	7.24793e-05	7.2162e-05	6.53887e-05
1140	6.5945e-05	6.42016e-05	5.56312e-05	7.27723e-05	6.69093e-05	7.41266e-05	7.2162e-05	6.73927e-05
1141	6.6219e-05	6.42016e-05	5.62018e-05	7.29931e-05	6.69093e-05	7.45758e-05	7.2162e-05	6.7609e-05
1142	6.6493e-05	6.42016e-05	5.64871e-05	7.3214e-05	6.69093e-05	7.44261e-05	7.2162e-05	6.7699e-05
1143	6.7587e-05	6.42016e-05	5.64871e-05	7.33244e-05	6.61128e-05	7.45758e-05	7.2162e-05	6.77788e-05
1144	6.8408e-05	6.42016e-05	5.62018e-05	7.28827e-05	6.61128e-05	7.45758e-05	7.2162e-05	6.77922e-05
1145	6.7314e-05	6.37189e-05	5.56312e-05	6.92385e-05	6.53163e-05	7.14311e-05	6.5602e-05	6.54645e-05
1146	6.704e-05	6.37189e-05	5.53459e-05	6.89073e-05	6.53163e-05	7.12813e-05	6.5602e-05	6.5316e-05
1147	6.5945e-05	6.27535e-05	5.50606e-05	6.80238e-05	6.45197e-05	6.99335e-05	6.5602e-05	6.45484e-05
1148	4.597e-05	4.48929e-05	4.36491e-05	4.81467e-05	5.65543e-05	4.83695e-05	4.5922e-05	4.76435e-05
1149	4.7065e-05	4.44102e-05	4.42197e-05	4.83676e-05	5.73509e-05	4.807e-05	4.5922e-05	4.79149e-05
1150	4.6791e-05	4.44102e-05	4.42197e-05	4.82572e-05	5.65543e-05	4.77705e-05	4.5922e-05	4.77035e-05
1151	3.5846e-05	2.94459e-05	3.70875e-05	3.52266e-05	4.14201e-05	3.48919e-05	3.9361e-05	3.61827e-05
1152	3.5846e-05	2.94459e-05	3.68022e-05	3.56683e-05	4.22166e-05	3.48919e-05	3.9361e-05	3.63189e-05
1153	3.4478e-05	2.84804e-05	3.68022e-05	3.41223e-05	3.9827e-05	3.36939e-05	3.9361e-05	3.52521e-05
1154	3.4204e-05	2.79977e-05	3.65169e-05	3.42328e-05	4.14201e-05	3.39934e-05	4.5922e-05	3.63266e-05
1155	3.4204e-05	2.79977e-05	3.65169e-05	3.43432e-05	4.14201e-05	3.39934e-05	4.5922e-05	3.63424e-05
1156	3.311e-05	2.70323e-05	3.5661e-05	3.25764e-05	3.9827e-05	3.27954e-05	3.2801e-05	3.34004e-05
1157	3.3383e-05	2.70323e-05	3.68022e-05	3.41223e-05	3.9827e-05	3.38436e-05	3.2801e-05	3.39731e-05
1158	3.3383e-05	2.70323e-05	3.68022e-05	3.41223e-05	3.9827e-05	3.38436e-05	3.2801e-05	3.39731e-05
1159	3.3383e-05	2.60668e-05	3.68022e-05	3.35702e-05	3.90305e-05	3.35441e-05	3.2801e-05	3.35997e-05
1160	3.2836e-05	2.55841e-05	3.62316e-05	3.33493e-05	3.90305e-05	3.27954e-05	3.2801e-05	3.32326e-05
1161	3.2836e-05	2.55841e-05	3.59463e-05	3.32389e-05	3.90305e-05	3.27954e-05	3.2801e-05	3.3176e-05
1162	3.2562e-05	2.36532e-05	3.28081e-05	3.15825e-05	3.90305e-05	3.08486e-05	2.6241e-05	3.09609e-05
1163	3.5572e-06	3.86175e-06	5.99105e-06	9.60726e-06	1.43377e-05	9.28454e-06	1.312e-05	8.53714e-06
1164	3.5572e-06	4.34447e-06	6.56163e-06	9.82812e-06	1.67273e-05	9.13479e-06	1.9681e-05	9.97632e-06
1165	3.01e-06	3.37903e-06	6.27634e-06	8.39255e-06	1.35412e-05	7.63728e-06	1.9681e-05	8.84528e-06
1166	2.7363e-06	1.44816e-06	4.56461e-06	5.96313e-06	7.9654e-06	4.94177e-06	1.312e-05	5.81997e-06
1167	4.1045e-06	3.86175e-06	5.99105e-06	8.39255e-06	1.0355e-05	7.03828e-06	1.312e-05	7.55194e-06
1168	4.1045e-06	3.86175e-06	6.27634e-06	8.39255e-06	1.0355e-05	7.03828e-06	1.312e-05	7.59269e-06
1169	2.7363e-06	3.37903e-06	4.27932e-06	7.06741e-06	7.9654e-06	5.69052e-06	1.312e-05	6.31978e-06
1170	4.1045e-06	3.37903e-06	4.56461e-06	7.84041e-06	1.0355e-05	6.58903e-06	1.312e-05	7.13615e-06
1171	4.1045e-06	3.37903e-06	4.8499e-06	7.95084e-06	1.0355e-05	6.58903e-06	1.312e-05	7.19268e-06
1172	4.3781e-06	3.86175e-06	4.56461e-06	8.50298e-06	1.0355e-05	7.18803e-06	1.312e-05	7.42442e-06
1173	4.6518e-06	3.86175e-06	5.99105e-06	8.94469e-06	1.11516e-05	7.63728e-06	1.312e-05	7.90836e-06
1174	4.9254e-06	3.86175e-06	5.99105e-06	8.83426e-06	1.11516e-05	7.63728e-06	1.312e-05	7.93168e-06
1175	4.9254e-06	3.86175e-06	5.99105e-06	8.61341e-06	1.11516e-05	7.63728e-06	6.5602e-06	6.96295e-06
1176	4.3781e-06	4.34447e-06	4.56461e-06	6.73613e-06	8.76194e-06	6.13978e-06	6.5602e-06	5.92647e-06
1177	4.9254e-06	4.82719e-06	5.13519e-06	7.61955e-06	8.76194e-06	7.03828e-06	6.5602e-06	6.40968e-06
1178	4.9254e-06	4.82719e-06	5.13519e-06	7.61955e-06	8.76194e-06	7.03828e-06	6.5602e-06	6.40968e-06
1179	4.9254e-06	4.82719e-06	5.13519e-06	7.61955e-06	8.76194e-06	7.03828e-06	6.5602e-06	6.40968e-06
1180	4.9254e-06	4.82719e-06	5.13519e-06	7.61955e-06	8.76194e-06	7.03828e-06	6.5602e-06	6.40968e-06
1181	4.9254e-06	4.82719e-06	5.13519e-06	7.61955e-06	8.76194e-06	7.03828e-06	6.5602e-06	6.40968e-06
1182	4.9254e-06	4.82719e-06	5.13519e-06	6.40484e-06	8.76194e-06	6.43928e-06	6.5602e-06	6.15058e-06
1183	4.9254e-06	4.82719e-06	5.13519e-06	6.73613e-06	8.76194e-06	6.73878e-06	6.5602e-06	6.24069e-06
1184	4.9254e-06	4.82719e-06	5.13519e-06	6.6257e-06	8.76194e-06	6.73878e-06	6.5602e-06	6.22491e-06
1185	4.9254e-06	4.82719e-06	5.13519e-06	6.73613e-06	8.76194e-06	6.73878e-06	6.5602e-06	6.24069e-06
1186	4.1045e-06	4.82719e-06	3.70875e-06	6.18399e-06	7.16886e-06	5.24127e-06	6.5602e-06	5.39925e-06
1187	4.1045e-06	5.30991e-06	3.70875e-06	6.40484e-06	7.16886e-06	5.69052e-06	6.5602e-06	5.56394e-06
1188	4.1045e-06	5.30991e-06	3.70875e-06	6.40484e-06	7.16886e-06	5.69052e-06	6.5602e-06	5.56394e-06
1189	4.1045e-06	5.30991e-06	3.70875e-06	6.40484e-06	7.16886e-06	5.69052e-06	6.5602e-06	5.56394e-06
1190	4.1045e-06	5.30991e-06	3.70875e-06	6.40484e-06	7.16886e-06	5.69052e-06	6.5602e-06	5.56394e-06
1191	3.8309e-06	5.30991e-06	2.85288e-06	5.74227e-06	7.16886e-06	5.09152e-06	6.5602e-06	5.22236e-06
1192	3.8309e-06	5.30991e-06	2.85288e-06	5.74227e-06	6.37232e-06	5.09152e-06	6.5602e-06	5.10857e-06
1193	3.8309e-06	5.30991e-06	2.85288e-06	5.74227e-06	6.37232e-06	4.94177e-06	6.5602e-06	5.08718e-06
1194	3.8309e-06	5.30991e-06	2.85288e-06	5.74227e-06	6.37232e-06	4.94177e-06	6.5602e-06	5.08718e-06
1195	2.4627e-06	3.86175e-06	2.56759e-06	4.52756e-06	4.77924e-06	3.29451e-06	6.5602e-06	4.00765e-06
1196	2.4627e-06	3.86175e-06	2.56759e-06	4.52756e-06	3.9827e-06	3.29451e-06	0	2.95669e-06
1197	2.1891e-06	3.86175e-06	2.56759e-06	4.19628e-06	3.9827e-06	3.14476e-06	0	2.84888e-06
1198	1.0945e-06	1.93088e-06	5.70576e-07	1.10428e-06	2.38962e-06	8.98504e-07	0	1.1412e-06
1199	1.0945e-06	2.4136e-06	2.85288e-07	1.32514e-06	1.59308e-06	1.04825e-06	0	1.10856e-06
1200	5.4726e-07	1.44816e-06	2.85288e-07	9.93855e-07	1.59308e-06	1.04825e-06	0	8.45128e-07
1201	8.209e-07	1.44816e-06	8.55865e-07	1.98771e-06	7.9654e-07	1.49751e-06	0	1.0581e-06
1202	1.0945e-06	1.93088e-06	8.55865e-07	2.31899e-06	7.9654e-07	2.09651e-06	0	1.29904e-06
1203	4.6518e-06	9.65438e-06	3.99404e-06	7.06741e-06	1.59308e-06	8.98504e-06	0	5.1351e-06
1204	4.9254e-06	9.65438e-06	3.99404e-06	7.72998e-06	2.38962e-06	9.43429e-06	0	5.44681e-06
1205	4.9254e-06	9.65438e-06	3.99404e-06	7.84041e-06	2.38962e-06	9.43429e-06	0	5.46259e-06
1206	4.6518e-06	9.65438e-06	3.70875e-06	8.06127e-06	2.38962e-06	9.58404e-06	0	5.43569e-06
1207	4.6518e-06	9.65438e-06	3.99404e-06	8.06127e-06	1.59308e-06	9.58404e-06	0	5.36265e-06
1208	6.5672e-06	1.39989e-05	5.99105e-06	9.93855e-06	2.38962e-06	1.1381e-05	0	7.1809e-06
1209	6.5672e-06	1.49643e-05	5.99105e-06	1.06011e-05	3.18616e-06	1.19801e-05	0	7.61284e-06
1210	6.8408e-06	1.68952e-05	6.56163e-06	1.11533e-05	3.18616e-06	1.25791e-05	0	8.17373e-06
1211	6.8408e-06	1.68952e-05	6.84692e-06	1.11533e-05	3.18616e-06	1.21298e-05	0	8.1503e-06
1212	6.8408e-06	1.68952e-05	6.84692e-06	1.19263e-05	3.18616e-06	1.28786e-05	0	8.3677e-06
1213	6.8408e-06	1.68952e-05	6.84692e-06	1.1595e-05	3.18616e-06	1.27288e-05	0	8.29898e-06
1214	6.8408e-06	1.68952e-05	6.84692e-06	1.1595e-05	3.18616e-06	1.27288e-05	0	8.29898e-06
1215	6.8408e-06	1.68952e-05	6.84692e-06	1.1595e-05	3.18616e-06	1.25791e-05	0	8.27758e-06
1216	6.8408e-06	1.68952e-05	6.84692e-06	1.14845e-05	3.18616e-06	1.25791e-05	0	8.26181e-06
1217	6.8408e-06	1.68952e-05	6.84692e-06	1.17054e-05	3.18616e-06	1.27288e-05	0	8.31475e-06
1218	6.8408e-06	1.68952e-05	6.84692e-06	1.17054e-05	3.18616e-06	1.27288e-05	0	8.31475e-06
1219	6.8408e-06	1.5447e-05	6.84692e-06	1.17054e-05	3.18616e-06	1.27288e-05	0	8.10787e-06
1220	1.2313e-05	1.78606e-05	9.41451e-06	2.17544e-05	5.57578e-06	2.44094e-05	0	1.30469e-05
1221	1.2313e-05	1.78606e-05	9.41451e-06	2.17544e-05	5.57578e-06	2.45591e-05	0	1.30683e-05
1222	1.2313e-05	1.78606e-05	9.41451e-06	2.15335e-05	5.57578e-06	2.47089e-05	0	1.30581e-05
1223	1.2587e-05	1.78606e-05	9.41451e-06	2.15335e-05	5.57578e-06	2.48586e-05	0	1.31186e-05
1224	1.2587e-05	1.68952e-05	8.27336e-06	2.13127e-05	5.57578e-06	2.42596e-05	0	1.27005e-05
1225	1.2587e-05	1.68952e-05	8.27336e-06	2.13127e-05	5.57578e-06	2.41099e-05	0	1.26791e-05
1226	1.2587e-05	1.68952e-05	8.27336e-06	2.13127e-05	5.57578e-06	2.41099e-05	0	1.26791e-05
1227	1.2587e-05	1.68952e-05	8.27336e-06	2.10918e-05	5.57578e-06	2.38104e-05	0	1.26048e-05
1228	1.0672e-05	9.17166e-06	5.13519e-06	1.6233e-05	3.18616e-06	1.88686e-05	0	9.03803e-06
1229	1.0672e-05	6.75807e-06	3.99404e-06	1.55704e-05	2.38962e-06	1.69218e-05	0	8.04366e-06
1230	7.9353e-06	3.37903e-06	2.56759e-06	1.32514e-05	2.38962e-06	1.42263e-05	0	6.2499e-06
1231	7.9353e-06	3.37903e-06	3.13817e-06	1.36931e-05	2.38962e-06	1.45258e-05	0	6.4373e-06
1232	6.2935e-06	2.4136e-06	3.42346e-06	1.2368e-05	2.38962e-06	1.39268e-05	0	5.83071e-06
1233	2.3259e-05	1.64125e-05	1.45497e-05	2.97052e-05	7.16886e-06	3.92347e-05	0	1.86185e-05
1234	2.3806e-05	1.64125e-05	1.51203e-05	3.09199e-05	7.16886e-06	4.04327e-05	0	1.91229e-05
1235	2.4901e-05	1.97915e-05	1.74026e-05	3.34598e-05	8.76194e-06	4.37272e-05	6.5602e-06	2.20862e-05
1236	2.4901e-05	1.97915e-05	1.74026e-05	3.36806e-05	8.76194e-06	4.37272e-05	6.5602e-06	2.21178e-05
1237	2.4901e-05	1.97915e-05	1.74026e-05	3.36806e-05	8.76194e-06	4.37272e-05	6.5602e-06	2.21178e-05
1238	2.4901e-05	1.97915e-05	1.74026e-05	3.39015e-05	8.76194e-06	4.37272e-05	6.5602e-06	2.21494e-05
1239	2.3259e-05	1.97915e-05	1.6832e-05	3.23555e-05	7.9654e-06	4.19302e-05	6.5602e-06	2.12419e-05
1240	2.3259e-05	1.97915e-05	1.6832e-05	3.25764e-05	7.9654e-06	4.23794e-05	6.5602e-06	2.13377e-05
1241	2.3532e-05	1.93088e-05	1.65467e-05	3.24659e-05	7.9654e-06	4.13312e-05	6.5602e-06	2.11015e-05
1242	2.3532e-05	1.93088e-05	1.65467e-05	3.23555e-05	7.9654e-06	4.05824e-05	6.5602e-06	2.09788e-05
1243	2.0796e-05	1.83433e-05	1.56909e-05	2.79384e-05	7.9654e-06	3.51914e-05	6.5602e-06	1.89265e-05
1244	2.1343e-05	1.8826e-05	1.56909e-05	2.99261e-05	8.76194e-06	3.68387e-05	6.5602e-06	1.97067e-05
1245	2.1343e-05	1.8826e-05	1.56909e-05	3.00365e-05	8.76194e-06	3.69884e-05	6.5602e-06	1.97439e-05
1246	2.1343e-05	1.8826e-05	1.56909e-05	3.00365e-05	8.76194e-06	3.69884e-05	6.5602e-06	1.97439e-05
1247	2.1343e-05	1.8826e-05	1.56909e-05	2.99261e-05	8.76194e-06	3.69884e-05	6.5602e-06	1.97281e-05
1248	2.1343e-05	1.8826e-05	1.56909e-05	2.99261e-05	8.76194e-06	3.69884e-05	6.5602e-06	1.97281e-05
1249	2.1343e-05	1.83433e-05	1.56909e-05	2.93739e-05	8.76194e-06	3.59402e-05	6.5602e-06	1.94305e-05
1250	2.1343e-05	1.83433e-05	1.56909e-05	2.92635e-05	8.76194e-06	3.59402e-05	6.5602e-06	1.94148e-05
1251	2.1343e-05	1.83433e-05	1.56909e-05	2.92635e-05	8.76194e-06	3.57904e-05	6.5602e-06	1.93934e-05
1252	2.107e-05	1.78606e-05	1.54056e-05	2.79384e-05	8.76194e-06	3.39934e-05	6.5602e-06	1.87985e-05
1253	2.107e-05	1.78606e-05	1.54056e-05	2.78279e-05	8.76194e-06	3.38436e-05	6.5602e-06	1.87614e-05
1254	1.9702e-05	1.59297e-05	1.42644e-05	2.62819e-05	8.76194e-06	3.23461e-05	6.5602e-06	1.76923e-05
1255	3.5572e-06	1.44816e-06	1.42644e-06	4.85885e-06	2.38962e-06	6.43928e-06	6.5602e-06	3.8114e-06
1256	4.3781e-06	1.44816e-06	1.42644e-06	4.96927e-06	2.38962e-06	6.43928e-06	0	3.00727e-06
1257	4.1045e-06	1.44816e-06	1.42644e-06	4.85885e-06	2.38962e-06	6.28953e-06	0	2.93101e-06
1258	4.1045e-06	1.44816e-06	1.42644e-06	4.85885e-06	2.38962e-06	6.28953e-06	0	2.93101e-06
1259	3.01e-06	9.65438e-07	5.70576e-07	3.31285e-06	7.9654e-07	3.74377e-06	0	1.7713e-06
1260	3.2836e-06	9.65438e-07	5.70576e-07	3.75456e-06	1.59308e-06	4.19302e-06	0	2.05147e-06
1261	3.01e-06	9.65438e-07	5.70576e-07	3.53371e-06	2.38962e-06	4.04327e-06	0	2.07322e-06
1262	3.01e-06	4.82719e-07	2.85288e-07	3.20242e-06	2.38962e-06	3.59402e-06	0	1.852e-06
1263	2.7363e-06	4.82719e-07	2.85288e-07	2.31899e-06	2.38962e-06	2.69551e-06	0	1.55835e-06
1264	2.4627e-06	4.82719e-07	2.85288e-07	1.43557e-06	1.59308e-06	1.94676e-06	0	1.1723e-06
1265	3.2836e-06	0	2.85288e-07	1.76685e-06	1.59308e-06	1.94676e-06	0	1.26794e-06
1266	3.2836e-06	0	2.85288e-07	1.76685e-06	1.59308e-06	1.94676e-06	0	1.26794e-06
1267	3.2836e-06	0	2.85288e-07	1.65642e-06	1.59308e-06	1.79701e-06	0	1.23077e-06
1268	5.199e-06	1.93088e-06	1.42644e-06	2.98156e-06	3.18616e-06	2.84526e-06	0	2.5099e-06
1269	5.199e-06	1.93088e-06	1.71173e-06	3.09199e-06	3.9827e-06	2.84526e-06	0	2.68023e-06
1270	5.199e-06	1.93088e-06	1.71173e-06	3.09199e-06	3.9827e-06	2.84526e-06	0	2.68023e-06
1271	5.199e-06	1.93088e-06	1.71173e-06	3.09199e-06	3.9827e-06	2.84526e-06	0	2.68023e-06
1272	5.199e-06	1.93088e-06	1.71173e-06	3.09199e-06	3.9827e-06	2.84526e-06	0	2.68023e-06
1273	4.9254e-06	1.93088e-06	1.71173e-06	2.87114e-06	3.9827e-06	2.84526e-06	0	2.60958e-06
1274	4.9254e-06	1.93088e-06	1.71173e-06	2.87114e-06	3.9827e-06	2.84526e-06	0	2.60958e-06
1275	4.6518e-06	1.93088e-06	1.71173e-06	2.76071e-06	3.9827e-06	2.09651e-06	0	2.44775e-06
1276	4.9254e-06	2.4136e-06	1.71173e-06	2.87114e-06	3.9827e-06	2.54576e-06	0	2.63576e-06
1277	4.9254e-06	2.4136e-06	1.71173e-06	2.65028e-06	3.9827e-06	2.54576e-06	0	2.60421e-06
1278	5.4726e-06	4.34447e-06	2.28231e-06	5.19013e-06	3.9827e-06	4.94177e-06	0	3.74486e-06
1279	5.4726e-06	4.34447e-06	2.28231e-06	5.30056e-06	3.9827e-06	4.94177e-06	0	3.76064e-06
1280	5.4726e-06	4.34447e-06	2.28231e-06	5.30056e-06	3.9827e-06	4.79202e-06	0	3.73924e-06
1281	5.4726e-06	4.34447e-06	2.28231e-06	5.30056e-06	3.9827e-06	4.64227e-06	0	3.71785e-06
1282	5.7463e-06	4.34447e-06	2.28231e-06	5.30056e-06	3.9827e-06	4.64227e-06	0	3.75694e-06
1283	5.199e-06	4.34447e-06	1.99702e-06	4.85885e-06	3.9827e-06	4.34277e-06	0	3.53212e-06
1284	5.199e-06	4.34447e-06	2.28231e-06	5.41099e-06	3.9827e-06	4.34277e-06	6.5602e-06	4.58892e-06
1285	4.9254e-06	4.34447e-06	2.28231e-06	5.19013e-06	3.9827e-06	4.34277e-06	6.5602e-06	4.51828e-06
1286	4.6518e-06	4.82719e-06	2.28231e-06	5.52142e-06	3.9827e-06	4.34277e-06	6.5602e-06	4.59548e-06
1287	1.6418e-05	9.65438e-06	7.41749e-06	1.2368e-05	6.37232e-06	1.0183e-05	3.2801e-05	1.3602e-05
1288	1.6418e-05	1.01371e-05	7.41749e-06	1.24784e-05	6.37232e-06	1.03328e-05	3.2801e-05	1.37082e-05
1289	1.5323e-05	9.65438e-06	6.84692e-06	1.21471e-05	5.57578e-06	9.73379e-06	3.2801e-05	1.31546e-05
1290	1.5323e-05	1.11025e-05	7.41749e-06	1.29201e-05	7.16886e-06	1.06323e-05	3.2801e-05	1.39094e-05
1291	1.5323e-05	1.11025e-05	7.41749e-06	1.26993e-05	7.16886e-06	1.06323e-05	3.2801e-05	1.38778e-05
1292	1.5323e-05	1.11025e-05	7.13221e-06	1.2368e-05	6.37232e-06	1.04825e-05	3.2801e-05	1.36546e-05
1293	1.5597e-05	1.11025e-05	7.13221e-06	1.2368e-05	6.37232e-06	1.0782e-05	3.2801e-05	1.37365e-05
1294	1.5871e-05	1.11025e-05	7.13221e-06	1.2368e-05	6.37232e-06	1.0782e-05	3.2801e-05	1.37755e-05
1295	1.5871e-05	1.11025e-05	7.13221e-06	1.2368e-05	6.37232e-06	1.0782e-05	3.2801e-05	1.37755e-05
1296	1.5871e-05	1.11025e-05	7.13221e-06	1.2368e-05	6.37232e-06	1.0782e-05	3.2801e-05	1.37755e-05
1297	1.5871e-05	1.11025e-05	7.13221e-06	1.2368e-05	6.37232e-06	1.06323e-05	3.2801e-05	1.37542e-05
1298	1.3682e-05	8.68894e-06	6.56163e-06	1.0049e-05	6.37232e-06	9.13479e-06	3.2801e-05	1.24699e-05
1299	1.3955e-05	9.17166e-06	8.84394e-06	1.04907e-05	9.55848e-06	1.03328e-05	3.9361e-05	1.45306e-05
1300	1.3955e-05	9.17166e-06	9.41451e-06	1.09324e-05	9.55848e-06	1.00333e-05	3.9361e-05	1.46324e-05
1301	1.505e-05	1.2068e-05	1.31233e-05	1.4687e-05	1.75239e-05	1.31781e-05	3.9361e-05	1.78559e-05
1302	1.505e-05	1.25507e-05	1.31233e-05	1.4687e-05	1.75239e-05	1.36273e-05	3.9361e-05	1.7989e-05
1303	1.505e-05	1.25507e-05	1.31233e-05	1.4687e-05	1.75239e-05	1.36273e-05	3.9361e-05	1.7989e-05
1304	1.505e-05	1.25507e-05	1.31233e-05	1.45765e-05	1.75239e-05	1.36273e-05	3.9361e-05	1.79733e-05
1305	1.5323e-05	1.25507e-05	1.25527e-05	1.38035e-05	1.75239e-05	1.31781e-05	3.2801e-05	1.6819e-05
1306	4.4055e-05	4.34447e-05	4.33638e-05	3.85395e-05	4.61993e-05	3.99834e-05	6.5602e-05	4.5884e-05
1307	4.4876e-05	4.58583e-05	4.39344e-05	3.88708e-05	4.61993e-05	4.01332e-05	5.9042e-05	4.55591e-05
1308	4.4876e-05	4.58583e-05	4.39344e-05	3.88708e-05	4.61993e-05	4.01332e-05	5.9042e-05	4.55591e-05
1309	4.5423e-05	4.58583e-05	4.36491e-05	3.89812e-05	4.61993e-05	4.04327e-05	5.9042e-05	4.56551e-05
1310	4.4328e-05	4.58583e-05	4.33638e-05	3.89812e-05	4.61993e-05	4.02829e-05	5.9042e-05	4.54366e-05
1311	3.4751e-05	4.19966e-05	3.87992e-05	3.41223e-05	4.46062e-05	3.68387e-05	5.2482e-05	4.05137e-05
1312	3.4751e-05	4.10311e-05	3.96551e-05	3.26868e-05	4.14201e-05	3.56407e-05	4.5922e-05	3.87295e-05
1313	4.597e-05	4.44102e-05	4.6502e-05	4.00855e-05	4.30132e-05	4.62729e-05	6.5602e-05	4.7408e-05
1314	4.597e-05	4.44102e-05	4.6502e-05	4.00855e-05	4.30132e-05	4.64227e-05	6.5602e-05	4.74294e-05
1315	4.597e-05	4.44102e-05	4.6502e-05	4.00855e-05	4.30132e-05	4.64227e-05	6.5602e-05	4.74294e-05
1316	4.597e-05	4.44102e-05	4.6502e-05	4.00855e-05	4.30132e-05	4.64227e-05	6.5602e-05	4.74294e-05
1317	4.597e-05	4.44102e-05	4.6502e-05	4.00855e-05	4.30132e-05	4.64227e-05	6.5602e-05	4.74294e-05
1318	4.597e-05	4.44102e-05	4.6502e-05	3.9975e-05	4.30132e-05	4.64227e-05	6.5602e-05	4.74136e-05
1319	4.597e-05	4.44102e-05	4.6502e-05	3.9975e-05	4.30132e-05	4.64227e-05	6.5602e-05	4.74136e-05
1320	4.5697e-05	4.44102e-05	4.53608e-05	3.96438e-05	4.30132e-05	4.59734e-05	6.5602e-05	4.71e-05
1321	4.5149e-05	4.39274e-05	4.50755e-05	3.94229e-05	4.30132e-05	4.52247e-05	6.5602e-05	4.67736e-05
1322	4.4602e-05	4.24793e-05	4.36491e-05	3.93125e-05	4.30132e-05	4.44759e-05	6.5602e-05	4.6162e-05
1323	4.4055e-05	4.15138e-05	4.19374e-05	3.82082e-05	4.14201e-05	4.32779e-05	5.2482e-05	4.32706e-05
1324	4.3781e-05	4.05484e-05	4.13668e-05	3.72143e-05	4.06235e-05	4.31282e-05	5.2482e-05	4.27349e-05
1325	3.1468e-05	3.0894e-05	2.967e-05	2.90426e-05	2.86754e-05	3.15974e-05	4.5922e-05	3.2467e-05
1326	3.2015e-05	3.23422e-05	2.99553e-05	2.99261e-05	3.10651e-05	3.41431e-05	5.2482e-05	3.45612e-05
1327	2.9826e-05	2.99286e-05	2.65318e-05	2.80488e-05	2.86754e-05	3.09984e-05	5.2482e-05	3.23558e-05
1328	2.9826e-05	2.99286e-05	2.65318e-05	2.80488e-05	2.86754e-05	3.09984e-05	5.2482e-05	3.23558e-05
1329	2.9005e-05	2.89631e-05	2.51054e-05	2.71654e-05	2.86754e-05	2.98004e-05	5.2482e-05	3.15995e-05
1330	2.8731e-05	2.89631e-05	2.48201e-05	2.69445e-05	2.86754e-05	2.98004e-05	5.2482e-05	3.14881e-05
1331	2.1343e-05	2.17224e-05	1.99702e-05	2.0871e-05	2.30997e-05	2.51581e-05	3.9361e-05	2.45037e-05
1332	3.5572e-06	5.30991e-06	3.70875e-06	5.0797e-06	9.55848e-06	6.88853e-06	6.5602e-06	5.80897e-06
1333	3.5572e-06	5.79263e-06	3.42346e-06	5.41099e-06	9.55848e-06	7.18803e-06	6.5602e-06	5.92729e-06
1334	3.5572e-06	5.30991e-06	3.13817e-06	4.52756e-06	9.55848e-06	6.28953e-06	6.5602e-06	5.56301e-06
1335	3.5572e-06	5.30991e-06	3.13817e-06	4.63799e-06	9.55848e-06	6.13978e-06	6.5602e-06	5.55739e-06
1336	2.7363e-06	4.34447e-06	2.85288e-06	3.97542e-06	9.55848e-06	4.94177e-06	6.5602e-06	4.99565e-06
1337	2.7363e-06	4.34447e-06	3.13817e-06	4.08585e-06	9.55848e-06	5.24127e-06	6.5602e-06	5.09497e-06
1338	2.7363e-06	4.34447e-06	3.13817e-06	4.08585e-06	9.55848e-06	5.24127e-06	6.5602e-06	5.09497e-06
1339	2.7363e-06	4.34447e-06	3.13817e-06	3.97542e-06	9.55848e-06	5.24127e-06	6.5602e-06	5.07919e-06
1340	2.7363e-06	3.86175e-06	3.13817e-06	3.86499e-06	7.9654e-06	4.79202e-06	6.5602e-06	4.7027e-06
1341	2.4627e-06	3.86175e-06	3.13817e-06	3.20242e-06	7.16886e-06	4.34277e-06	6.5602e-06	4.39098e-06
1342	2.4627e-06	3.86175e-06	3.13817e-06	3.31285e-06	7.16886e-06	4.34277e-06	6.5602e-06	4.40676e-06
1343	2.4627e-06	3.86175e-06	3.13817e-06	3.31285e-06	7.16886e-06	4.34277e-06	6.5602e-06	4.40676e-06
1344	2.4627e-06	3.86175e-06	3.13817e-06	3.31285e-06	6.37232e-06	4.34277e-06	6.5602e-06	4.29297e-06
1345	1.3682e-06	2.4136e-06	2.28231e-06	2.98156e-06	5.57578e-06	3.59402e-06	6.5602e-06	3.53938e-06
1346	1.3682e-06	2.4136e-06	1.71173e-06	3.09199e-06	4.77924e-06	2.99501e-06	0	2.3371e-06
1347	8.209e-07	1.44816e-06	1.14115e-06	1.546e-06	2.38962e-06	1.19801e-06	0	1.22055e-06
1348	8.209e-07	1.44816e-06	1.14115e-06	1.76685e-06	1.59308e-06	1.49751e-06	0	1.18109e-06
1349	1.3682e-06	9.65438e-07	8.55865e-07	2.42942e-06	1.59308e-06	2.24626e-06	0	1.35118e-06
1350	3.2836e-06	2.89631e-06	8.55865e-07	6.40484e-06	1.59308e-06	4.04327e-06	0	2.72528e-06
1351	3.2836e-06	2.89631e-06	8.55865e-07	6.73613e-06	1.59308e-06	4.34277e-06	0	2.81539e-06
1352	3.2836e-06	3.37903e-06	8.55865e-07	6.84656e-06	1.59308e-06	4.34277e-06	0	2.90013e-06
1353	3.2836e-06	3.37903e-06	5.70576e-07	6.73613e-06	1.59308e-06	4.19302e-06	0	2.8222e-06
1354	3.2836e-06	3.37903e-06	5.70576e-07	6.6257e-06	1.59308e-06	4.19302e-06	0	2.80643e-06
1355	3.2836e-06	2.89631e-06	5.70576e-07	6.6257e-06	2.38962e-06	4.34277e-06	0	2.87265e-06
1356	3.2836e-06	2.89631e-06	5.70576e-07	7.06741e-06	2.38962e-06	4.49252e-06	0	2.95715e-06
1357	3.2836e-06	2.89631e-06	5.70576e-07	7.50912e-06	7.9654e-07	4.19302e-06	0	2.74988e-06
1358	4.3781e-06	3.86175e-06	1.71173e-06	1.18158e-05	2.38962e-06	8.23628e-06	0	4.62762e-06
1359	4.3781e-06	4.34447e-06	1.71173e-06	1.18158e-05	2.38962e-06	8.23628e-06	0	4.69658e-06
1360	4.3781e-06	4.34447e-06	1.42644e-06	1.18158e-05	2.38962e-06	8.23628e-06	0	4.65582e-06
1361	4.3781e-06	4.34447e-06	1.42644e-06	1.19263e-05	2.38962e-06	8.23628e-06	0	4.6716e-06
1362	4.3781e-06	4.34447e-06	1.42644e-06	1.19263e-05	2.38962e-06	8.23628e-06	0	4.6716e-06
1363	4.3781e-06	4.34447e-06	1.42644e-06	1.18158e-05	2.38962e-06	8.23628e-06	0	4.65582e-06
1364	4.3781e-06	4.34447e-06	1.71173e-06	1.18158e-05	2.38962e-06	8.23628e-06	0	4.69658e-06
1365	4.3781e-06	4.34447e-06	1.71173e-06	1.19263e-05	2.38962e-06	8.38604e-06	0	4.73375e-06
1366	4.3781e-06	4.34447e-06	1.71173e-06	1.19263e-05	2.38962e-06	8.38604e-06	0	4.73375e-06
1367	4.3781e-06	4.34447e-06	1.71173e-06	1.19263e-05	2.38962e-06	8.38604e-06	0	4.73375e-06
1368	3.2836e-06	4.34447e-06	1.42644e-06	1.09324e-05	2.38962e-06	7.33778e-06	0	4.2449e-06
1369	3.5572e-06	4.34447e-06	2.28231e-06	1.7006e-05	3.9827e-06	1.37771e-05	0	6.42139e-06
1370	3.5572e-06	4.34447e-06	2.28231e-06	1.73372e-05	3.9827e-06	1.39268e-05	0	6.49011e-06
1371	3.5572e-06	4.34447e-06	2.28231e-06	1.73372e-05	3.9827e-06	1.39268e-05	0	6.49011e-06
1372	3.5572e-06	3.37903e-06	2.28231e-06	1.7006e-05	3.9827e-06	1.34776e-05	0	6.24068e-06
1373	3.5572e-06	3.37903e-06	2.28231e-06	1.68955e-05	3.9827e-06	1.33278e-05	0	6.20351e-06
1374	3.2836e-06	3.37903e-06	2.28231e-06	1.57912e-05	3.9827e-06	1.31781e-05	0	5.98528e-06
1375	2.4627e-06	1.44816e-06	2.28231e-06	1.33618e-05	3.18616e-06	1.15308e-05	0	4.89599e-06
1376	2.4627e-06	1.44816e-06	2.28231e-06	1.41348e-05	3.18616e-06	1.21298e-05	0	5.09199e-06
1377	2.1891e-06	1.44816e-06	1.99702e-06	1.28097e-05	3.18616e-06	1.1381e-05	0	4.71588e-06
1378	4.9254e-06	5.79263e-06	8.55865e-06	2.89322e-05	1.35412e-05	2.87521e-05	6.5602e-06	1.38661e-05
1379	4.9254e-06	5.79263e-06	8.84394e-06	2.91531e-05	1.35412e-05	2.93511e-05	6.5602e-06	1.40239e-05
1380	4.9254e-06	5.79263e-06	8.84394e-06	2.91531e-05	1.35412e-05	2.92014e-05	6.5602e-06	1.40025e-05
1381	4.9254e-06	5.79263e-06	8.84394e-06	2.91531e-05	1.35412e-05	2.93511e-05	6.5602e-06	1.40239e-05
1382	4.9254e-06	5.79263e-06	8.84394e-06	2.90426e-05	1.35412e-05	2.93511e-05	6.5602e-06	1.40082e-05
1383	4.6518e-06	5.79263e-06	8.84394e-06	2.91531e-05	1.43377e-05	2.93511e-05	6.5602e-06	1.40986e-05
1384	4.6518e-06	6.27535e-06	8.84394e-06	2.91531e-05	1.51343e-05	2.92014e-05	6.5602e-06	1.426e-05
1385	1.3408e-05	1.97915e-05	1.76879e-05	7.19993e-05	2.9472e-05	6.70883e-05	1.312e-05	3.32239e-05
1386	1.4503e-05	2.07569e-05	1.96849e-05	7.7852e-05	3.18616e-05	7.24793e-05	1.312e-05	3.57511e-05
1387	1.4229e-05	2.07569e-05	1.96849e-05	7.82937e-05	3.26581e-05	7.24793e-05	1.312e-05	3.58889e-05
1388	1.4229e-05	2.07569e-05	1.96849e-05	7.80728e-05	3.18616e-05	7.20301e-05	1.312e-05	3.56794e-05
1389	1.4229e-05	2.07569e-05	1.96849e-05	7.7852e-05	3.18616e-05	7.17306e-05	1.312e-05	3.5605e-05
1390	1.4229e-05	2.07569e-05	1.96849e-05	7.79624e-05	3.18616e-05	7.15808e-05	1.312e-05	3.55994e-05
1391	1.3955e-05	2.07569e-05	1.96849e-05	7.7079e-05	3.18616e-05	7.15808e-05	1.312e-05	3.54341e-05
1392	1.4503e-05	2.12396e-05	1.96849e-05	7.57538e-05	3.18616e-05	7.08321e-05	1.312e-05	3.5285e-05
1393	1.806e-05	2.12396e-05	2.0826e-05	7.82937e-05	3.18616e-05	7.30783e-05	1.312e-05	3.66399e-05
1394	1.9428e-05	2.17224e-05	2.11113e-05	7.96188e-05	3.18616e-05	7.39768e-05	1.312e-05	3.72627e-05
1395	1.9428e-05	2.17224e-05	2.13966e-05	7.99501e-05	3.18616e-05	7.42763e-05	1.312e-05	3.73936e-05
1396	2.0249e-05	2.12396e-05	2.11113e-05	7.84041e-05	3.10651e-05	7.20301e-05	1.312e-05	3.67456e-05
1397	2.0249e-05	2.12396e-05	2.05408e-05	7.95084e-05	3.10651e-05	7.17306e-05	1.312e-05	3.67791e-05
1398	2.0522e-05	2.07569e-05	2.05408e-05	7.95084e-05	3.02685e-05	7.09818e-05	1.312e-05	3.65285e-05
1399	1.8333e-05	2.07569e-05	1.79732e-05	7.2441e-05	2.78789e-05	6.31948e-05	1.312e-05	3.33855e-05
1400	2.2985e-05	2.89631e-05	2.0826e-05	8.99991e-05	3.34547e-05	7.83196e-05	1.9681e-05	4.20326e-05
1401	2.2711e-05	2.89631e-05	2.0826e-05	9.05512e-05	3.34547e-05	7.83196e-05	1.9681e-05	4.20724e-05
1402	2.2711e-05	2.89631e-05	2.0826e-05	9.06616e-05	3.34547e-05	7.87688e-05	1.9681e-05	4.21524e-05
1403	2.2711e-05	2.84804e-05	2.05408e-05	9.06616e-05	3.34547e-05	7.87688e-05	1.9681e-05	4.20426e-05
1404	2.2985e-05	2.84804e-05	2.02555e-05	9.03304e-05	3.34547e-05	7.81698e-05	1.9681e-05	4.19081e-05
1405	1.8607e-05	2.26878e-05	1.51203e-05	7.45391e-05	2.30997e-05	6.21465e-05	1.312e-05	3.27601e-05
1406	2.4901e-05	3.28249e-05	2.28231e-05	8.59132e-05	3.10651e-05	7.24793e-05	1.312e-05	4.04466e-05
1407	2.6816e-05	3.47558e-05	2.39642e-05	8.77905e-05	3.50478e-05	7.42763e-05	1.312e-05	4.2253e-05
1408	2.8458e-05	3.76521e-05	2.53907e-05	8.62445e-05	3.82339e-05	7.45758e-05	1.312e-05	4.33822e-05
1409	3.2562e-05	4.15138e-05	2.71024e-05	9.35328e-05	4.14201e-05	7.90683e-05	1.312e-05	4.69029e-05
1410	3.3657e-05	4.05484e-05	2.62465e-05	9.34223e-05	4.06235e-05	7.80201e-05	1.312e-05	4.65197e-05
1411	3.393e-05	4.00657e-05	2.65318e-05	9.17659e-05	4.14201e-05	7.71216e-05	1.312e-05	4.62794e-05
1412	3.4751e-05	3.9583e-05	2.68171e-05	9.36432e-05	4.14201e-05	7.89186e-05	1.312e-05	4.68934e-05
1413	3.4751e-05	3.9583e-05	2.62465e-05	9.37536e-05	4.14201e-05	7.84693e-05	1.312e-05	4.67635e-05
1414	3.393e-05	3.9583e-05	2.56759e-05	9.13242e-05	4.06235e-05	7.54743e-05	1.312e-05	4.5676e-05
1415	3.2562e-05	3.81348e-05	2.39642e-05	8.87844e-05	3.9827e-05	7.33778e-05	1.312e-05	4.4253e-05
1416	2.8184e-05	3.52385e-05	2.33936e-05	8.03918e-05	3.66408e-05	6.75375e-05	1.312e-05	4.06438e-05
1417	3.1194e-05	4.97201e-05	3.39493e-05	9.22076e-05	4.06235e-05	7.81698e-05	4.5922e-05	5.31123e-05
1418	3.1194e-05	5.02028e-05	3.39493e-05	9.20972e-05	4.06235e-05	7.78703e-05	4.5922e-05	5.31227e-05
1419	3.092e-05	5.02028e-05	3.3664e-05	9.16555e-05	4.06235e-05	7.74211e-05	4.5922e-05	5.29156e-05
1420	3.0647e-05	5.02028e-05	3.3664e-05	9.05512e-05	4.06235e-05	7.66723e-05	4.5922e-05	5.26117e-05
1421	2.7363e-05	4.92374e-05	3.22376e-05	7.13367e-05	3.82339e-05	6.15475e-05	4.5922e-05	4.6554e-05
1422	3.1468e-05	5.79263e-05	3.82286e-05	7.7852e-05	4.30132e-05	6.81365e-05	4.5922e-05	5.17923e-05
1423	3.1741e-05	5.59954e-05	3.70875e-05	7.21097e-05	4.14201e-05	6.34943e-05	4.5922e-05	4.96814e-05
1424	3.1741e-05	5.59954e-05	3.70875e-05	7.18888e-05	4.14201e-05	6.3644e-05	4.5922e-05	4.96712e-05
1425	3.1741e-05	5.59954e-05	3.68022e-05	7.13367e-05	4.14201e-05	6.3644e-05	4.5922e-05	4.95516e-05
1426	3.1741e-05	5.59954e-05	3.65169e-05	7.12263e-05	4.14201e-05	6.33445e-05	4.5922e-05	4.94523e-05
1427	1.9975e-05	5.21337e-05	2.73877e-05	6.41588e-05	3.74374e-05	5.406e-05	3.9361e-05	4.20734e-05
1428	1.9702e-05	5.16509e-05	2.68171e-05	6.18399e-05	3.42512e-05	5.21132e-05	3.9361e-05	4.08193e-05
1429	1.6965e-05	4.48929e-05	2.33936e-05	5.10179e-05	2.54893e-05	4.31282e-05	3.9361e-05	3.48926e-05
1430	1.7512e-05	4.58583e-05	2.33936e-05	5.17909e-05	2.62858e-05	4.35774e-05	4.5922e-05	3.63343e-05
1431	1.7512e-05	4.58583e-05	2.31083e-05	5.16804e-05	2.62858e-05	4.29784e-05	4.5922e-05	3.61922e-05
1432	1.7239e-05	4.58583e-05	2.31083e-05	5.14596e-05	2.54893e-05	4.29784e-05	4.5922e-05	3.60078e-05
1433	1.6418e-05	4.2962e-05	2.31083e-05	4.9251e-05	2.38962e-05	4.04327e-05	4.5922e-05	3.457e-05
1434	1.4229e-05	3.81348e-05	2.11113e-05	4.06376e-05	2.15066e-05	3.41431e-05	4.5922e-05	3.0812e-05
1435	1.2861e-05	3.71694e-05	2.0826e-05	3.95333e-05	2.15066e-05	3.26456e-05	4.5922e-05	3.00662e-05
1436	9.3035e-06	2.31705e-05	1.34085e-05	2.61715e-05	1.59308e-05	2.27621e-05	2.6241e-05	1.95697e-05
1437	9.0299e-06	2.07569e-05	1.36938e-05	2.50672e-05	1.75239e-05	2.12646e-05	2.6241e-05	1.90825e-05
1438	9.0299e-06	2.07569e-05	1.36938e-05	2.50672e-05	1.75239e-05	2.12646e-05	2.6241e-05	1.90825e-05
1439	9.0299e-06	2.02742e-05	1.36938e-05	2.45151e-05	1.75239e-05	2.08153e-05	2.6241e-05	1.88704e-05
1440	9.0299e-06	2.02742e-05	1.34085e-05	2.42942e-05	1.67273e-05	2.06656e-05	2.6241e-05	1.86629e-05
1441	7.9353e-06	1.49643e-05	8.84394e-06	1.89937e-05	1.51343e-05	1.57238e-05	1.9681e-05	1.4468e-05
1442	8.209e-07	3.37903e-06	1.99702e-06	2.42942e-06	4.77924e-06	2.54576e-06	6.5602e-06	3.21594e-06
1443	1.9154e-06	3.86175e-06	5.70576e-06	5.52142e-06	1.51343e-05	5.69052e-06	6.5602e-06	6.34134e-06
1444	2.1891e-06	4.82719e-06	6.56163e-06	5.63184e-06	1.67273e-05	5.54077e-06	6.5602e-06	6.86258e-06
1445	2.1891e-06	7.24079e-06	1.11262e-05	6.84656e-06	2.071e-05	6.43928e-06	1.312e-05	9.66748e-06
1446	2.4627e-06	7.24079e-06	1.16968e-05	7.72998e-06	2.30997e-05	7.03828e-06	1.312e-05	1.03412e-05
1447	2.7363e-06	7.24079e-06	1.19821e-05	7.17784e-06	2.30997e-05	6.58903e-06	1.312e-05	1.0278e-05
1448	7.1144e-06	2.22051e-05	2.39642e-05	2.20857e-05	3.74374e-05	2.35108e-05	3.2801e-05	2.41598e-05
1449	7.3881e-06	2.22051e-05	2.42495e-05	2.24169e-05	3.74374e-05	2.42596e-05	3.2801e-05	2.4394e-05
1450	7.3881e-06	2.26878e-05	2.42495e-05	2.23065e-05	3.74374e-05	2.44094e-05	3.2801e-05	2.44685e-05
1451	7.3881e-06	2.26878e-05	2.42495e-05	2.23065e-05	3.74374e-05	2.44094e-05	3.2801e-05	2.44685e-05
1452	7.6617e-06	2.26878e-05	2.42495e-05	2.23065e-05	3.74374e-05	2.44094e-05	3.2801e-05	2.45076e-05
1453	7.6617e-06	2.31705e-05	2.42495e-05	2.23065e-05	3.74374e-05	2.44094e-05	3.2801e-05	2.45766e-05
1454	2.0522e-05	5.98572e-05	4.67873e-05	4.5386e-05	6.53163e-05	4.65724e-05	5.9042e-05	4.90691e-05
1455	2.0796e-05	6.1788e-05	4.82137e-05	4.7705e-05	6.77059e-05	4.8669e-05	7.2162e-05	5.24343e-05
1456	2.3259e-05	6.80634e-05	5.19225e-05	5.14596e-05	7.72644e-05	5.13645e-05	7.2162e-05	5.64993e-05
1457	2.7911e-05	7.0477e-05	5.64871e-05	5.91896e-05	8.04505e-05	5.91515e-05	7.2162e-05	6.08327e-05
1458	2.8184e-05	7.0477e-05	5.64871e-05	6.04043e-05	8.04505e-05	5.96008e-05	7.2162e-05	6.11094e-05
1459	2.8184e-05	7.0477e-05	5.64871e-05	6.07356e-05	8.12471e-05	6.03495e-05	7.2162e-05	6.13775e-05
1460	2.8184e-05	7.09597e-05	5.64871e-05	6.0846e-05	8.12471e-05	6.04993e-05	7.2162e-05	6.14837e-05
1461	2.8184e-05	7.09597e-05	5.64871e-05	6.09564e-05	8.12471e-05	6.04993e-05	7.2162e-05	6.14994e-05
1462	2.8458e-05	7.09597e-05	5.67724e-05	6.11773e-05	8.04505e-05	6.005e-05	7.2162e-05	6.14329e-05
1463	3.7761e-05	7.62696e-05	7.07515e-05	7.48704e-05	8.84159e-05	7.30783e-05	7.2162e-05	7.04728e-05
1464	3.7761e-05	7.62696e-05	7.07515e-05	7.49808e-05	8.84159e-05	7.35276e-05	7.2162e-05	7.05527e-05
1465	3.7761e-05	7.62696e-05	7.01809e-05	7.49808e-05	8.76194e-05	7.32281e-05	7.2162e-05	7.03146e-05
1466	3.7761e-05	7.62696e-05	7.01809e-05	7.50912e-05	8.76194e-05	7.33778e-05	7.2162e-05	7.03518e-05
1467	3.7761e-05	7.57869e-05	6.90398e-05	7.44287e-05	8.76194e-05	7.27788e-05	6.5602e-05	6.90024e-05
1468	3.5299e-05	6.95116e-05	5.84841e-05	6.96803e-05	7.48747e-05	6.57405e-05	4.5922e-05	5.99302e-05
1469	3.5299e-05	6.95116e-05	5.87694e-05	7.03428e-05	7.48747e-05	6.604e-05	5.2482e-05	6.10456e-05
1470	3.5299e-05	6.85461e-05	5.84841e-05	7.03428e-05	7.48747e-05	6.45425e-05	5.2482e-05	6.06529e-05
1471	3.3383e-05	6.03399e-05	5.30636e-05	6.3938e-05	6.0537e-05	6.005e-05	4.5922e-05	5.38905e-05
1472	3.4204e-05	6.13053e-05	5.50606e-05	6.6257e-05	6.21301e-05	6.16973e-05	4.5922e-05	5.52251e-05
1473	3.1741e-05	5.64781e-05	5.16372e-05	6.19503e-05	6.37232e-05	5.81032e-05	3.9361e-05	5.18564e-05
1474	2.8184e-05	4.77892e-05	4.59314e-05	5.57663e-05	5.33682e-05	5.13645e-05	3.2801e-05	4.50293e-05
1475	3.8582e-05	6.46844e-05	5.87694e-05	7.91771e-05	7.32817e-05	7.09818e-05	4.5922e-05	6.16283e-05
1476	3.8582e-05	6.51671e-05	5.84841e-05	7.97292e-05	7.40782e-05	7.09818e-05	4.5922e-05	6.18492e-05
1477	3.8582e-05	6.46844e-05	5.84841e-05	7.95084e-05	7.24851e-05	7.06823e-05	4.5922e-05	6.14783e-05
1478	3.8582e-05	6.46844e-05	5.90547e-05	7.97292e-05	7.32817e-05	7.09818e-05	4.5922e-05	6.17479e-05
1479	3.8582e-05	6.42016e-05	5.87694e-05	7.92875e-05	7.32817e-05	7.00833e-05	4.5922e-05	6.14467e-05
1480	3.8856e-05	6.46844e-05	5.87694e-05	7.91771e-05	7.32817e-05	7.0233e-05	4.5922e-05	6.15604e-05
1481	3.8582e-05	6.46844e-05	5.81988e-05	7.88458e-05	7.32817e-05	6.9634e-05	4.5922e-05	6.13069e-05
1482	3.8035e-05	6.46844e-05	5.76282e-05	7.87354e-05	7.32817e-05	6.82863e-05	4.5922e-05	6.09389e-05
1483	2.0249e-05	4.92374e-05	3.85139e-05	5.78644e-05	6.0537e-05	4.65724e-05	2.6241e-05	4.2745e-05
1484	2.6269e-05	5.503e-05	4.62167e-05	6.64778e-05	6.53163e-05	5.43595e-05	3.9361e-05	5.04329e-05
1485	3.0373e-05	5.74436e-05	5.16372e-05	7.13367e-05	7.00955e-05	5.87022e-05	3.9361e-05	5.41357e-05
1486	2.9279e-05	5.30991e-05	4.79284e-05	6.36067e-05	6.37232e-05	5.25625e-05	4.5922e-05	5.08743e-05
1487	3.0373e-05	5.74436e-05	4.96402e-05	7.07845e-05	6.45197e-05	5.73545e-05	4.5922e-05	5.37196e-05
1488	3.0647e-05	5.64781e-05	4.99254e-05	7.13367e-05	6.53163e-05	5.73545e-05	4.5922e-05	5.38542e-05
1489	2.7911e-05	4.19966e-05	4.05109e-05	6.11773e-05	4.93855e-05	4.91182e-05	3.2801e-05	4.32714e-05
1490	3.3383e-05	6.37189e-05	4.25079e-05	7.23305e-05	5.33682e-05	5.8852e-05	5.2482e-05	5.38061e-05
1491	3.311e-05	6.42016e-05	4.27932e-05	7.25514e-05	5.33682e-05	5.8852e-05	5.2482e-05	5.39082e-05
1492	3.1741e-05	5.98572e-05	4.07962e-05	6.86864e-05	4.77924e-05	5.67555e-05	5.2482e-05	5.11587e-05
1493	4.4876e-05	9.4613e-05	5.70576e-05	9.41953e-05	5.81474e-05	7.72713e-05	6.5602e-05	7.02518e-05
1494	4.6791e-05	9.55784e-05	5.81988e-05	9.64039e-05	5.81474e-05	7.92181e-05	6.5602e-05	7.142e-05
1495	5.0075e-05	9.7992e-05	6.10517e-05	0.000102809	5.89439e-05	8.22131e-05	6.5602e-05	7.40981e-05
1496	5.0622e-05	9.89574e-05	6.10517e-05	0.000103692	5.89439e-05	8.20633e-05	6.5602e-05	7.4419e-05
1497	5.0896e-05	9.89574e-05	6.10517e-05	0.000103582	5.81474e-05	8.16141e-05	6.5602e-05	7.42643e-05
1498	8.9204e-05	0.00011006	7.56014e-05	0.000128097	6.45197e-05	0.000103777	7.8723e-05	9.28546e-05
1499	9.0299e-05	0.00011006	7.56014e-05	0.000128318	6.45197e-05	0.000104526	7.8723e-05	9.31494e-05
1500	9.0572e-05	0.00011006	7.56014e-05	0.000128539	6.45197e-05	0.000104825	7.8723e-05	9.32629e-05
1501	9.0846e-05	0.000109577	7.47455e-05	0.000127655	6.45197e-05	0.000104226	7.8723e-05	9.28989e-05
1502	9.0846e-05	0.000109577	7.47455e-05	0.000127766	6.45197e-05	0.000104376	7.8723e-05	9.29361e-05
1503	9.0846e-05	0.000109577	7.47455e-05	0.000127545	6.45197e-05	0.000104226	7.8723e-05	9.28832e-05
1504	8.8383e-05	0.000103302	7.07515e-05	0.000120146	6.13336e-05	9.88354e-05	7.2162e-05	8.78449e-05
1505	8.9204e-05	0.000103302	7.18926e-05	0.000121471	6.13336e-05	9.92847e-05	7.2162e-05	8.83786e-05
1506	8.9204e-05	0.000103302	7.18926e-05	0.000121582	6.13336e-05	9.94344e-05	7.2162e-05	8.84158e-05
1507	8.9204e-05	0.000103302	7.18926e-05	0.000121582	6.13336e-05	9.94344e-05	7.2162e-05	8.84158e-05
1508	8.8657e-05	0.000103302	7.13221e-05	0.00012125	6.13336e-05	9.91349e-05	7.2162e-05	8.8166e-05
1509	8.811e-05	0.000103302	7.13221e-05	0.00012114	6.13336e-05	9.89852e-05	7.2162e-05	8.80507e-05
1510	8.811e-05	0.000103302	7.13221e-05	0.000120919	6.13336e-05	9.82364e-05	7.2162e-05	8.79121e-05
1511	8.811e-05	0.000103302	7.07515e-05	0.000120477	6.13336e-05	9.82364e-05	7.2162e-05	8.77675e-05
1512	8.4552e-05	9.75093e-05	6.64722e-05	0.000116281	5.65543e-05	9.46424e-05	7.2162e-05	8.40249e-05
1513	8.0174e-05	9.26821e-05	6.24781e-05	0.000114072	5.49612e-05	9.17971e-05	6.5602e-05	8.02525e-05
1514	7.7164e-05	8.44758e-05	5.67724e-05	0.000107557	5.25716e-05	8.61066e-05	5.2482e-05	7.38757e-05
1515	7.6891e-05	8.39931e-05	5.67724e-05	0.000107557	5.25716e-05	8.52081e-05	5.2482e-05	7.36393e-05
1516	7.6617e-05	8.35104e-05	5.67724e-05	0.000106674	5.17751e-05	8.44594e-05	5.2482e-05	7.31843e-05
1517	4.898e-05	5.30991e-05	3.33787e-05	7.5533e-05	3.66408e-05	6.15475e-05	3.2801e-05	4.88543e-05
1518	2.8184e-05	2.55841e-05	1.6832e-05	4.52756e-05	1.51343e-05	3.71382e-05	2.6241e-05	2.77699e-05
1519	2.7911e-05	2.51014e-05	1.65467e-05	4.51652e-05	1.59308e-05	3.72879e-05	2.6241e-05	2.77405e-05
1520	1.8333e-05	1.5447e-05	1.0841e-05	2.87114e-05	9.55848e-06	2.56074e-05	1.9681e-05	1.83113e-05
1521	1.9975e-05	1.5447e-05	1.34085e-05	3.84291e-05	1.27446e-05	3.92347e-05	2.6241e-05	2.364e-05
1522	1.9428e-05	1.44816e-05	1.31233e-05	3.86499e-05	1.27446e-05	3.83362e-05	2.6241e-05	2.32863e-05
1523	1.6144e-05	1.35161e-05	1.25527e-05	3.71039e-05	1.27446e-05	3.71382e-05	1.9681e-05	2.12686e-05
1524	1.5323e-05	1.35161e-05	1.25527e-05	3.68831e-05	1.27446e-05	3.66889e-05	1.9681e-05	2.10556e-05
1525	6.8408e-06	4.82719e-06	7.13221e-06	2.61715e-05	1.0355e-05	2.89019e-05	1.312e-05	1.3907e-05
1526	1.0398e-05	1.11025e-05	1.31233e-05	4.62695e-05	1.9117e-05	4.70217e-05	1.9681e-05	2.38161e-05
1527	1.0398e-05	1.11025e-05	1.31233e-05	4.70425e-05	1.9117e-05	4.76207e-05	1.9681e-05	2.40121e-05
1528	1.0672e-05	1.06198e-05	1.34085e-05	4.6932e-05	1.9117e-05	4.79202e-05	1.9681e-05	2.405e-05
1529	1.0672e-05	1.06198e-05	1.34085e-05	4.75946e-05	1.9117e-05	4.85192e-05	1.9681e-05	2.42302e-05
1530	1.0672e-05	1.06198e-05	1.34085e-05	4.75946e-05	1.9117e-05	4.8669e-05	1.9681e-05	2.42516e-05
1531	1.1219e-05	1.06198e-05	1.34085e-05	4.7705e-05	1.9117e-05	4.8669e-05	1.9681e-05	2.43456e-05
1532	1.2861e-05	1.06198e-05	1.36938e-05	4.93615e-05	1.99135e-05	4.95675e-05	1.9681e-05	2.50996e-05
1533	1.3134e-05	1.11025e-05	1.39791e-05	5.0024e-05	1.99135e-05	4.9867e-05	1.9681e-05	2.53859e-05
1534	1.2861e-05	1.11025e-05	1.39791e-05	4.96927e-05	1.99135e-05	5.01665e-05	1.9681e-05	2.53422e-05
1535	1.3134e-05	1.11025e-05	1.39791e-05	5.02449e-05	1.99135e-05	5.03162e-05	1.9681e-05	2.54816e-05
1536	1.3134e-05	1.11025e-05	1.39791e-05	5.02449e-05	1.99135e-05	5.0466e-05	1.9681e-05	2.5503e-05
1537	1.2861e-05	1.11025e-05	1.36938e-05	5.0024e-05	1.99135e-05	5.03162e-05	1.9681e-05	2.53702e-05
1538	1.2587e-05	1.06198e-05	1.36938e-05	4.98032e-05	1.99135e-05	4.97172e-05	1.9681e-05	2.5145e-05
1539	1.2587e-05	1.06198e-05	1.36938e-05	4.98032e-05	1.99135e-05	4.95675e-05	1.9681e-05	2.51236e-05
1540	1.1766e-05	9.65438e-06	1.2838e-05	4.6932e-05	1.83204e-05	4.62729e-05	1.9681e-05	2.36378e-05
1541	1.1766e-05	9.65438e-06	1.2838e-05	4.68216e-05	1.83204e-05	4.59734e-05	1.9681e-05	2.35792e-05
1542	1.1493e-05	9.65438e-06	1.2838e-05	4.56069e-05	1.75239e-05	4.40267e-05	6.5602e-06	2.11004e-05
1543	7.1144e-06	6.75807e-06	7.70278e-06	2.82696e-05	9.55848e-06	2.39601e-05	6.5602e-06	1.28462e-05
1544	7.3881e-06	6.75807e-06	7.98807e-06	2.90426e-05	1.11516e-05	2.50084e-05	1.312e-05	1.4351e-05
1545	7.3881e-06	6.75807e-06	7.98807e-06	2.93739e-05	1.19481e-05	2.53079e-05	1.312e-05	1.45549e-05
1546	7.3881e-06	5.79263e-06	7.13221e-06	2.80488e-05	1.11516e-05	2.36606e-05	1.312e-05	1.37563e-05
1547	7.3881e-06	5.30991e-06	7.13221e-06	2.86009e-05	1.11516e-05	2.38104e-05	1.312e-05	1.37876e-05
1548	7.3881e-06	5.30991e-06	7.13221e-06	2.87114e-05	1.19481e-05	2.38104e-05	1.312e-05	1.39172e-05
1549	7.3881e-06	5.30991e-06	7.13221e-06	2.87114e-05	1.19481e-05	2.36606e-05	1.312e-05	1.38958e-05
1550	7.3881e-06	5.30991e-06	6.56163e-06	2.69445e-05	1.19481e-05	2.24626e-05	1.312e-05	1.33907e-05
1551	6.8408e-06	3.37903e-06	3.99404e-06	2.38525e-05	1.11516e-05	1.87188e-05	1.312e-05	1.15796e-05
1552	6.5672e-06	2.89631e-06	3.99404e-06	2.24169e-05	1.0355e-05	1.78203e-05	1.312e-05	1.10243e-05
1553	6.5672e-06	2.4136e-06	3.99404e-06	2.24169e-05	1.0355e-05	1.78203e-05	1.312e-05	1.09554e-05
1554	6.5672e-06	2.4136e-06	3.42346e-06	2.13127e-05	1.0355e-05	1.73711e-05	1.312e-05	1.06519e-05
1555	5.4726e-07	9.65438e-07	1.14115e-06	3.42328e-06	3.18616e-06	3.29451e-06	6.5602e-06	2.73115e-06
1556	5.4726e-07	4.82719e-07	1.14115e-06	4.3067e-06	3.18616e-06	3.89352e-06	6.5602e-06	2.87396e-06
1557	5.4726e-07	4.82719e-07	1.14115e-06	4.19628e-06	3.18616e-06	4.04327e-06	6.5602e-06	2.87958e-06
1558	5.4726e-07	4.82719e-07	1.14115e-06	3.75456e-06	3.18616e-06	3.29451e-06	6.5602e-06	2.70951e-06
1559	1.6418e-06	4.82719e-07	1.71173e-06	5.96313e-06	3.9827e-06	5.09152e-06	6.5602e-06	3.6334e-06
1560	1.6418e-06	4.82719e-07	1.71173e-06	5.96313e-06	3.9827e-06	5.09152e-06	6.5602e-06	3.6334e-06
1561	1.6418e-06	4.82719e-07	1.71173e-06	5.96313e-06	3.9827e-06	5.09152e-06	6.5602e-06	3.6334e-06
1562	1.6418e-06	4.82719e-07	1.71173e-06	5.8527e-06	3.9827e-06	4.94177e-06	6.5602e-06	3.59623e-06
1563	1.6418e-06	4.82719e-07	1.42644e-06	5.74227e-06	3.9827e-06	4.49252e-06	6.5602e-06	3.47552e-06
1564	1.6418e-06	4.82719e-07	1.42644e-06	5.63184e-06	3.9827e-06	4.04327e-06	6.5602e-06	3.39557e-06
1565	1.6418e-06	4.82719e-07	1.42644e-06	5.74227e-06	3.9827e-06	4.19302e-06	6.5602e-06	3.43274e-06
1566	1.6418e-06	4.82719e-07	1.42644e-06	5.74227e-06	3.9827e-06	4.19302e-06	6.5602e-06	3.43274e-06
1567	1.6418e-06	4.82719e-07	1.14115e-06	5.52142e-06	3.9827e-06	4.19302e-06	6.5602e-06	3.36043e-06
1568	1.3682e-06	4.82719e-07	8.55865e-07	5.0797e-06	3.18616e-06	3.74377e-06	0	2.10234e-06
1569	1.3682e-06	4.82719e-07	8.55865e-07	5.19013e-06	3.9827e-06	3.74377e-06	0	2.23191e-06
1570	1.3682e-06	4.82719e-07	8.55865e-07	4.85885e-06	3.9827e-06	3.59402e-06	0	2.16319e-06
1571	1.6418e-06	0	5.70576e-07	4.19628e-06	3.18616e-06	3.14476e-06	0	1.81994e-06
1572	1.6418e-06	0	5.70576e-07	4.41713e-06	3.18616e-06	3.44426e-06	0	1.89428e-06
1573	1.6418e-06	0	5.70576e-07	3.97542e-06	3.18616e-06	3.14476e-06	0	1.78839e-06
1574	1.9154e-06	1.93088e-06	1.42644e-06	5.8527e-06	5.57578e-06	5.09152e-06	0	3.11325e-06
1575	2.1891e-06	1.93088e-06	1.71173e-06	6.07356e-06	5.57578e-06	5.24127e-06	0	3.24604e-06
1576	2.1891e-06	1.93088e-06	1.71173e-06	5.96313e-06	5.57578e-06	5.24127e-06	0	3.23026e-06
1577	2.1891e-06	1.93088e-06	1.99702e-06	6.6257e-06	5.57578e-06	5.69052e-06	0	3.42985e-06
1578	2.1891e-06	1.93088e-06	1.99702e-06	6.73613e-06	5.57578e-06	5.69052e-06	0	3.44563e-06
1579	1.6418e-06	1.93088e-06	1.99702e-06	4.85885e-06	4.77924e-06	4.34277e-06	0	2.79293e-06
1580	1.6418e-06	1.93088e-06	2.85288e-06	5.19013e-06	4.77924e-06	5.09152e-06	0	3.06949e-06
1581	1.3682e-06	2.4136e-06	2.85288e-06	4.96927e-06	4.77924e-06	4.94177e-06	0	3.04642e-06
1582	4.6518e-06	9.17166e-06	1.0841e-05	1.64538e-05	1.99135e-05	1.93178e-05	0	1.14785e-05
1583	4.6518e-06	9.17166e-06	1.0841e-05	1.64538e-05	1.99135e-05	1.99168e-05	0	1.15641e-05
1584	4.9254e-06	9.65438e-06	1.0841e-05	1.71164e-05	2.071e-05	2.03661e-05	0	1.19447e-05
1585	4.9254e-06	9.65438e-06	1.0841e-05	1.71164e-05	2.071e-05	2.03661e-05	0	1.19447e-05
1586	4.9254e-06	9.65438e-06	1.0841e-05	1.71164e-05	2.071e-05	2.03661e-05	0	1.19447e-05
1587	4.9254e-06	9.65438e-06	1.0841e-05	1.71164e-05	2.071e-05	2.03661e-05	0	1.19447e-05
1588	4.9254e-06	9.65438e-06	1.0841e-05	1.72268e-05	2.071e-05	2.03661e-05	0	1.19605e-05
1589	4.6518e-06	9.65438e-06	1.05557e-05	1.66747e-05	1.99135e-05	1.97671e-05	0	1.16024e-05
1590	1.0124e-05	1.68952e-05	2.56759e-05	3.40119e-05	3.66408e-05	4.05824e-05	6.5602e-06	2.43558e-05
1591	1.5871e-05	1.97915e-05	3.25229e-05	4.39505e-05	4.46062e-05	5.12147e-05	1.312e-05	3.15824e-05
1592	1.6965e-05	1.97915e-05	3.45199e-05	4.59382e-05	4.69959e-05	5.31615e-05	1.312e-05	3.29275e-05
1593	1.806e-05	2.02742e-05	3.59463e-05	4.71529e-05	4.69959e-05	5.4659e-05	1.312e-05	3.37441e-05
1594	1.8333e-05	2.07569e-05	3.62316e-05	4.81467e-05	4.69959e-05	5.67555e-05	1.312e-05	3.43343e-05
1595	1.806e-05	2.07569e-05	3.62316e-05	4.8478e-05	4.77924e-05	5.66057e-05	1.312e-05	3.4435e-05
1596	2.3259e-05	2.79977e-05	4.4505e-05	6.19503e-05	5.73509e-05	6.99335e-05	1.9681e-05	4.35253e-05
1597	2.3259e-05	2.79977e-05	4.4505e-05	6.19503e-05	5.73509e-05	6.99335e-05	1.9681e-05	4.35253e-05
1598	2.3259e-05	2.79977e-05	4.4505e-05	6.20607e-05	5.73509e-05	6.99335e-05	1.9681e-05	4.3541e-05
1599	2.3259e-05	2.79977e-05	4.4505e-05	6.20607e-05	5.73509e-05	6.97838e-05	1.9681e-05	4.35196e-05
1600	2.3259e-05	2.79977e-05	4.4505e-05	6.20607e-05	5.73509e-05	6.97838e-05	1.9681e-05	4.35196e-05
1601	2.3259e-05	2.79977e-05	4.4505e-05	6.12877e-05	5.73509e-05	6.82863e-05	1.9681e-05	4.31953e-05
1602	2.2438e-05	2.7515e-05	4.4505e-05	6.02939e-05	5.57578e-05	6.6639e-05	1.9681e-05	4.24042e-05
1603	4.2413e-05	3.47558e-05	5.50606e-05	8.51402e-05	6.37232e-05	9.01499e-05	2.6241e-05	5.67834e-05
1604	4.3508e-05	3.47558e-05	5.47753e-05	8.53611e-05	6.29266e-05	9.11981e-05	2.6241e-05	5.69665e-05
1605	4.3508e-05	3.47558e-05	5.47753e-05	8.53611e-05	6.29266e-05	9.13479e-05	2.6241e-05	5.69879e-05
1606	4.3781e-05	3.47558e-05	5.47753e-05	8.52507e-05	6.29266e-05	9.13479e-05	2.6241e-05	5.70112e-05
1607	4.3781e-05	3.47558e-05	5.47753e-05	8.53611e-05	6.29266e-05	9.14976e-05	2.6241e-05	5.70484e-05
1608	4.3781e-05	3.42731e-05	5.42048e-05	8.45881e-05	6.29266e-05	9.01499e-05	2.6241e-05	5.65949e-05
1609	4.3781e-05	3.42731e-05	5.42048e-05	8.45881e-05	6.29266e-05	9.01499e-05	2.6241e-05	5.65949e-05
1610	4.3781e-05	3.42731e-05	5.39195e-05	8.42568e-05	6.29266e-05	8.88021e-05	2.6241e-05	5.63143e-05
1611	4.3781e-05	3.42731e-05	5.36342e-05	8.41464e-05	6.21301e-05	8.86524e-05	2.6241e-05	5.61226e-05
1612	3.8582e-05	3.28249e-05	4.53608e-05	7.40974e-05	5.89439e-05	7.77206e-05	2.6241e-05	5.05387e-05
1613	3.311e-05	2.99286e-05	3.87992e-05	5.94104e-05	4.69959e-05	6.16973e-05	1.9681e-05	4.13745e-05
1614	3.311e-05	2.99286e-05	3.85139e-05	5.90791e-05	4.61993e-05	6.10983e-05	1.9681e-05	4.10871e-05
1615	3.1194e-05	2.65496e-05	3.48052e-05	5.5435e-05	4.38097e-05	5.6456e-05	6.5602e-06	3.64014e-05
1616	2.408e-05	1.5447e-05	1.74026e-05	3.64413e-05	2.071e-05	3.71382e-05	6.5602e-06	2.25399e-05
1617	2.4901e-05	2.46187e-05	2.22525e-05	4.35088e-05	3.10651e-05	4.41764e-05	6.5602e-06	2.81546e-05
1618	2.4901e-05	2.46187e-05	2.25378e-05	4.42818e-05	3.10651e-05	4.41764e-05	6.5602e-06	2.83058e-05
1619	2.4901e-05	2.46187e-05	2.28231e-05	4.41713e-05	3.10651e-05	4.40267e-05	6.5602e-06	2.83094e-05
1620	2.408e-05	2.22051e-05	2.02555e-05	4.27358e-05	3.02685e-05	4.16307e-05	6.5602e-06	2.68193e-05
1621	2.4901e-05	2.55841e-05	2.22525e-05	4.54965e-05	3.26581e-05	4.35774e-05	6.5602e-06	2.87185e-05
1622	2.3259e-05	2.60668e-05	2.25378e-05	4.42818e-05	3.26581e-05	4.35774e-05	6.5602e-06	2.84201e-05
1623	2.107e-05	2.60668e-05	2.13966e-05	4.32879e-05	3.26581e-05	4.25292e-05	6.5602e-06	2.76527e-05
1624	1.8333e-05	2.22051e-05	1.8829e-05	3.94229e-05	3.02685e-05	3.90849e-05	6.5602e-06	2.49577e-05
1625	6.0199e-06	1.97915e-05	1.51203e-05	2.23065e-05	2.62858e-05	2.23128e-05	6.5602e-06	1.69139e-05
1626	1.4229e-05	5.64781e-05	3.30934e-05	4.3067e-05	4.85889e-05	4.64227e-05	6.5602e-06	3.54913e-05
1627	1.806e-05	8.01314e-05	4.30785e-05	5.34473e-05	6.21301e-05	5.75042e-05	6.5602e-06	4.58445e-05
1628	1.7512e-05	8.06141e-05	4.27932e-05	5.2343e-05	6.29266e-05	5.78037e-05	6.5602e-06	4.57933e-05
1629	1.7786e-05	8.06141e-05	4.27932e-05	5.10179e-05	6.29266e-05	5.61565e-05	6.5602e-06	4.54078e-05
1630	1.8333e-05	8.10968e-05	4.27932e-05	5.17909e-05	6.29266e-05	5.79535e-05	6.5602e-06	4.59221e-05
1631	1.806e-05	8.10968e-05	4.27932e-05	5.0797e-05	6.29266e-05	5.72047e-05	6.5602e-06	4.56341e-05
1632	1.8607e-05	8.10968e-05	4.27932e-05	5.157e-05	6.29266e-05	5.7654e-05	6.5602e-06	4.58868e-05
1633	1.806e-05	8.10968e-05	4.27932e-05	5.14596e-05	6.29266e-05	5.73545e-05	6.5602e-06	4.57501e-05
1634	1.7786e-05	8.01314e-05	4.07962e-05	4.89197e-05	5.97405e-05	5.43595e-05	6.5602e-06	4.40419e-05
1635	2.0522e-05	8.10968e-05	4.25079e-05	5.73123e-05	5.97405e-05	5.8852e-05	6.5602e-06	4.6656e-05
1636	2.0522e-05	8.10968e-05	4.22227e-05	5.74227e-05	5.89439e-05	5.90018e-05	6.5602e-06	4.65386e-05
1637	2.0522e-05	8.10968e-05	4.22227e-05	5.75331e-05	5.89439e-05	5.93013e-05	6.5602e-06	4.65972e-05
1638	2.0522e-05	8.10968e-05	4.19374e-05	5.76436e-05	5.89439e-05	5.93013e-05	6.5602e-06	4.65722e-05
1639	2.0249e-05	8.10968e-05	4.19374e-05	5.73123e-05	5.89439e-05	5.97505e-05	6.5602e-06	4.655e-05
1640	2.0249e-05	8.10968e-05	4.07962e-05	5.72019e-05	5.89439e-05	5.90018e-05	6.5602e-06	4.62642e-05
1641	2.0249e-05	7.96487e-05	4.07962e-05	5.70914e-05	5.89439e-05	5.90018e-05	6.5602e-06	4.60416e-05
1642	2.0249e-05	7.96487e-05	4.07962e-05	5.6981e-05	5.81474e-05	5.90018e-05	6.5602e-06	4.5912e-05
1643	1.9975e-05	7.96487e-05	4.05109e-05	5.6981e-05	5.81474e-05	5.90018e-05	6.5602e-06	4.58322e-05
1644	1.9428e-05	7.09597e-05	3.45199e-05	5.06866e-05	4.61993e-05	5.13645e-05	6.5602e-06	3.99597e-05
1645	1.9428e-05	7.0477e-05	3.3664e-05	5.05762e-05	4.14201e-05	5.1664e-05	6.5602e-06	3.91128e-05
1646	1.0398e-05	2.55841e-05	1.34085e-05	3.23555e-05	1.27446e-05	2.92014e-05	6.5602e-06	1.86075e-05
1647	1.0945e-05	2.51014e-05	1.4835e-05	3.48953e-05	1.35412e-05	3.20466e-05	0	1.87664e-05
1648	6.2935e-06	6.27535e-06	6.56163e-06	2.38525e-05	5.57578e-06	1.88686e-05	0	9.63249e-06
1649	9.5771e-06	1.11025e-05	1.05557e-05	3.61101e-05	9.55848e-06	3.32446e-05	0	1.57355e-05
1650	9.8508e-06	1.11025e-05	1.05557e-05	3.62205e-05	9.55848e-06	3.32446e-05	0	1.57904e-05
1651	9.5771e-06	9.17166e-06	9.98509e-06	3.40119e-05	8.76194e-06	3.17471e-05	0	1.47507e-05
1652	9.3035e-06	7.24079e-06	9.98509e-06	3.32389e-05	7.16886e-06	3.03994e-05	0	1.39052e-05
1653	1.7512e-05	2.17224e-05	2.7673e-05	5.58767e-05	1.35412e-05	5.13645e-05	0	2.68129e-05
1654	1.9154e-05	2.22051e-05	2.85288e-05	5.76436e-05	1.51343e-05	5.39102e-05	0	2.80823e-05
1655	1.9154e-05	2.26878e-05	2.85288e-05	5.78644e-05	1.51343e-05	5.39102e-05	0	2.81828e-05
1656	1.9154e-05	2.26878e-05	2.88141e-05	5.76436e-05	1.51343e-05	5.406e-05	0	2.82134e-05
1657	1.9702e-05	2.26878e-05	2.88141e-05	5.75331e-05	1.51343e-05	5.406e-05	0	2.82758e-05
1658	1.9154e-05	2.26878e-05	2.88141e-05	5.58767e-05	1.35412e-05	5.24127e-05	0	2.74981e-05
1659	1.9975e-05	2.36532e-05	2.967e-05	5.25639e-05	1.67273e-05	5.06157e-05	0	2.76008e-05
1660	2.2438e-05	2.51014e-05	3.19523e-05	5.53246e-05	1.75239e-05	5.45092e-05	0	2.95499e-05
1661	2.1891e-05	2.51014e-05	3.13817e-05	5.30056e-05	1.67273e-05	5.24127e-05	0	2.86456e-05
1662	6.8408e-05	4.05484e-05	6.01958e-05	9.55205e-05	3.74374e-05	9.23961e-05	3.2801e-05	6.10439e-05
1663	7.2239e-05	4.2962e-05	6.10517e-05	9.72873e-05	3.74374e-05	9.34444e-05	3.2801e-05	6.24604e-05
1664	7.4154e-05	4.2962e-05	6.19075e-05	9.87229e-05	3.74374e-05	9.41931e-05	3.2801e-05	6.31684e-05
1665	7.4975e-05	4.2962e-05	6.19075e-05	9.91646e-05	3.74374e-05	9.47922e-05	3.2801e-05	6.34343e-05
1666	7.4975e-05	4.34447e-05	6.16223e-05	9.86125e-05	3.74374e-05	9.46424e-05	3.2801e-05	6.33622e-05
1667	7.5523e-05	4.2962e-05	6.16223e-05	9.87229e-05	3.74374e-05	9.44927e-05	3.2801e-05	6.33658e-05
1668	7.7712e-05	4.53756e-05	6.16223e-05	9.68456e-05	3.82339e-05	9.17971e-05	3.2801e-05	6.34839e-05
1669	8.0174e-05	4.6341e-05	6.39046e-05	9.52996e-05	3.82339e-05	9.04494e-05	3.9361e-05	6.48234e-05
1670	8.1816e-05	4.48929e-05	6.50457e-05	9.09929e-05	3.66408e-05	8.67056e-05	3.9361e-05	6.36365e-05
1671	0.00028047	0.000266944	0.000355469	0.000190158	0.000306668	0.000226722	0.00052482	0.000307322
1672	0.00029005	0.000270805	0.000364313	0.000195348	0.000309854	0.000231664	0.0005445	0.000315219
1673	0.00030401	0.000279012	0.000377151	0.00020098	0.000313837	0.000240649	0.0005445	0.000322876
1674	0.0003092	0.000283839	0.000385139	0.000204845	0.000321802	0.00024604	0.00055106	0.000328847
1675	0.00030975	0.000283839	0.000385139	0.000204955	0.000321802	0.00024634	0.00055106	0.000328984
1676	0.0003103	0.000284322	0.000385424	0.000205286	0.000322599	0.000246639	0.00055106	0.000329375
1677	0.00031085	0.000284322	0.000385995	0.000205728	0.000322599	0.000246639	0.00055106	0.000329598
1678	0.00031139	0.000284322	0.000386566	0.00020628	0.000323395	0.000246639	0.00055106	0.000329951
1679	0.00031139	0.000284322	0.000386566	0.00020628	0.000323395	0.000246639	0.00055106	0.000329951
1680	0.00031139	0.000284804	0.000386566	0.00020628	0.000323395	0.000246639	0.00055106	0.000330019
1681	0.00031194	0.00028577	0.000386566	0.00020617	0.000324192	0.000246639	0.00055106	0.000330334
1682	0.00031194	0.000284804	0.00038628	0.000205507	0.000324192	0.00024649	0.00055106	0.000330039
1683	0.00031276	0.000287218	0.000387707	0.000203519	0.000324988	0.000244393	0.00055106	0.000330235
1684	0.00033219	0.000295907	0.000397977	0.000209593	0.000330564	0.000249934	0.00056418	0.000340049
1685	0.00032453	0.000295907	0.000395409	0.000204955	0.000332157	0.000244543	0.0005773	0.000339257
1686	0.00032535	0.000299769	0.000399118	0.000197556	0.000332954	0.000236906	0.00058386	0.000339359
1687	0.00035326	0.000314733	0.000413668	0.000209703	0.000336936	0.00025248	0.00059042	0.000353028
1688	0.00036557	0.000320526	0.000422227	0.000213458	0.000338529	0.000256523	0.00059042	0.000358179
1689	0.00036639	0.000321008	0.000422512	0.000214231	0.000338529	0.000257272	0.00059042	0.000358624
1690	0.00036338	0.000320526	0.000416806	0.000213789	0.00033614	0.000256523	0.00059042	0.000356798
1691	0.00036119	0.000321008	0.000414239	0.000213237	0.000332954	0.000255025	0.00059042	0.00035544
1692	0.00027801	0.000239911	0.000315243	0.000166636	0.000258079	0.00020396	0.00043953	0.000271625
1693	0.00027856	0.000237981	0.000319808	0.000168734	0.000257282	0.000208004	0.00043953	0.000272843
1694	0.00025913	0.000210466	0.000290423	0.000151949	0.000230997	0.000186889	0.00038705	0.000245272
1695	0.00026597	0.000210466	0.000292991	0.000156035	0.00023259	0.000190633	0.00039361	0.0002489
1696	0.00026624	0.000210466	0.000293276	0.000156035	0.00023259	0.000191232	0.00039361	0.000249065
1697	0.00026597	0.000211431	0.000293562	0.000156035	0.00023259	0.000191082	0.00039361	0.000249183
1698	0.00026488	0.000210948	0.000292706	0.000155373	0.000229403	0.000190633	0.00039361	0.000248222
1699	0.0002646	0.000210466	0.00029242	0.000154931	0.00022781	0.000190483	0.00039361	0.000247761
1700	0.00026433	0.0002095	0.00029242	0.000154268	0.00022781	0.000189734	0.00039361	0.000247382
1701	0.0002646	0.0002095	0.00029185	0.000154158	0.00022781	0.000188686	0.00039361	0.000247174
1702	0.00026187	0.000206604	0.000290138	0.000153274	0.000226217	0.000187338	0.00038705	0.000244642
1703	0.0002594	0.000205638	0.000286429	0.00015217	0.000226217	0.000185092	0.00036737	0.000240332
1704	0.00025831	0.000204673	0.000284432	0.00015206	0.000225421	0.000184643	0.00036737	0.000239559
1705	0.00025338	0.000201777	0.000277871	0.00014952	0.000224624	0.000182995	0.00035425	0.000234917
1706	0.0002449	0.000198398	0.000271309	0.000147864	0.000220642	0.0001803	0.00034113	0.000229221
1707	5.8284e-05	7.86832e-05	0.000103274	7.02324e-05	9.47882e-05	8.22131e-05	9.8403e-05	8.36969e-05
1708	5.8557e-05	7.91659e-05	0.000103274	7.06741e-05	9.47882e-05	8.28121e-05	9.8403e-05	8.39536e-05
1709	5.1169e-05	5.88917e-05	8.90099e-05	6.20607e-05	7.80609e-05	6.94843e-05	6.5602e-05	6.77541e-05
1710	3.7214e-05	2.70323e-05	5.07813e-05	3.73248e-05	3.74374e-05	4.55242e-05	2.6241e-05	3.7365e-05
1711	4.5423e-05	3.42731e-05	6.10517e-05	4.95823e-05	4.54028e-05	6.22963e-05	3.2801e-05	4.72615e-05
1712	4.5423e-05	3.52385e-05	6.19075e-05	5.04657e-05	4.69959e-05	6.27455e-05	3.2801e-05	4.79396e-05
1713	4.4328e-05	3.47558e-05	6.10517e-05	5.06866e-05	4.93855e-05	6.22963e-05	3.2801e-05	4.79008e-05
1714	2.7363e-05	2.4136e-05	4.05109e-05	3.48953e-05	3.34547e-05	4.52247e-05	2.6241e-05	3.3118e-05
1715	5.3085e-05	3.04113e-05	5.73429e-05	5.59872e-05	3.90305e-05	6.43928e-05	7.2162e-05	5.32017e-05
1716	5.4453e-05	3.04113e-05	5.76282e-05	5.73123e-05	3.90305e-05	6.52913e-05	7.2162e-05	5.37555e-05
1717	5.1169e-05	2.55841e-05	5.27783e-05	5.20117e-05	3.42512e-05	5.90018e-05	6.5602e-05	4.86284e-05
1718	5.1169e-05	2.55841e-05	5.27783e-05	5.20117e-05	3.42512e-05	5.90018e-05	6.5602e-05	4.86284e-05
1719	5.0622e-05	2.51014e-05	5.30636e-05	5.17909e-05	3.42512e-05	5.90018e-05	6.5602e-05	4.84904e-05
1720	5.0622e-05	2.51014e-05	5.30636e-05	5.17909e-05	3.42512e-05	5.90018e-05	6.5602e-05	4.84904e-05
1721	4.8707e-05	2.46187e-05	5.16372e-05	5.0797e-05	3.34547e-05	5.73545e-05	6.5602e-05	4.7453e-05
1722	4.5149e-05	2.36532e-05	4.36491e-05	4.67112e-05	2.9472e-05	5.39102e-05	6.5602e-05	4.4021e-05
1723	4.5149e-05	2.26878e-05	4.36491e-05	4.62695e-05	2.78789e-05	5.37605e-05	5.9042e-05	4.26339e-05
1724	4.3508e-05	1.83433e-05	3.68022e-05	4.19628e-05	2.30997e-05	4.76207e-05	5.9042e-05	3.86254e-05
1725	4.5149e-05	1.97915e-05	3.7658e-05	4.79259e-05	2.46927e-05	5.2862e-05	5.9042e-05	4.10173e-05
1726	4.5149e-05	1.97915e-05	3.7658e-05	4.82572e-05	2.46927e-05	5.2862e-05	5.9042e-05	4.10647e-05
1727	4.4876e-05	2.12396e-05	3.85139e-05	5.02449e-05	2.70824e-05	5.55575e-05	5.9042e-05	4.23651e-05
1728	4.7612e-05	2.7515e-05	4.22227e-05	5.87479e-05	3.18616e-05	6.3644e-05	5.9042e-05	4.7235e-05
1729	4.8159e-05	2.7515e-05	4.25079e-05	5.96313e-05	3.18616e-05	6.4842e-05	5.9042e-05	4.76513e-05
1730	4.8159e-05	2.70323e-05	4.22227e-05	5.94104e-05	3.18616e-05	6.45425e-05	5.9042e-05	4.74672e-05
1731	4.8159e-05	2.70323e-05	4.22227e-05	5.94104e-05	3.18616e-05	6.46923e-05	5.9042e-05	4.74886e-05
1732	4.8159e-05	2.70323e-05	4.16521e-05	5.93e-05	3.18616e-05	6.4243e-05	5.9042e-05	4.73272e-05
1733	4.7338e-05	2.70323e-05	4.16521e-05	5.91896e-05	3.18616e-05	6.40933e-05	5.9042e-05	4.71727e-05
1734	2.3806e-05	2.36532e-05	2.79582e-05	4.49443e-05	2.38962e-05	4.38769e-05	2.6241e-05	3.06251e-05
1735	2.5448e-05	2.36532e-05	2.88141e-05	4.58277e-05	2.38962e-05	4.50749e-05	1.9681e-05	3.03421e-05
1736	2.5721e-05	2.36532e-05	2.88141e-05	4.59382e-05	2.38962e-05	4.52247e-05	1.9681e-05	3.04184e-05
1737	2.5721e-05	2.31705e-05	2.82435e-05	4.5386e-05	2.38962e-05	4.47754e-05	1.9681e-05	3.01248e-05
1738	2.1617e-05	2.07569e-05	2.33936e-05	4.20732e-05	2.23031e-05	4.10317e-05	1.9681e-05	2.72652e-05
1739	9.8508e-06	1.11025e-05	9.6998e-06	2.41838e-05	9.55848e-06	2.51581e-05	6.5602e-06	1.37305e-05
1740	3.8035e-05	1.68952e-05	4.33638e-05	5.7754e-05	4.14201e-05	5.73545e-05	0	3.64032e-05
1741	4.8159e-05	2.26878e-05	6.3334e-05	7.0122e-05	5.65543e-05	7.30783e-05	0	4.77051e-05
1742	5.1443e-05	2.26878e-05	6.78986e-05	7.33244e-05	5.81474e-05	7.63728e-05	0	4.9982e-05
1743	5.8284e-05	2.36532e-05	7.30338e-05	7.79624e-05	5.97405e-05	8.11648e-05	0	5.34055e-05
1744	6.403e-05	2.46187e-05	8.04513e-05	8.23795e-05	6.29266e-05	8.68554e-05	0	5.73231e-05
1745	6.9229e-05	2.60668e-05	8.64423e-05	8.64654e-05	6.69093e-05	9.17971e-05	0	6.09871e-05
1746	7.3607e-05	2.60668e-05	9.15775e-05	8.85635e-05	7.0892e-05	9.40434e-05	0	6.35358e-05
1747	7.607e-05	1.97915e-05	8.95805e-05	8.46985e-05	7.00955e-05	8.80534e-05	0	6.11842e-05
1748	9.5771e-05	2.02742e-05	9.52863e-05	9.87229e-05	7.0892e-05	0.000100632	6.5602e-06	6.97342e-05
1749	9.6319e-05	2.02742e-05	9.52863e-05	9.97168e-05	7.0892e-05	0.00010198	6.5602e-06	7.01469e-05
1750	9.6592e-05	2.02742e-05	9.55716e-05	0.000100048	7.0892e-05	0.00010213	6.5602e-06	7.02955e-05
1751	9.6592e-05	2.02742e-05	9.55716e-05	9.99376e-05	7.00955e-05	0.00010213	6.5602e-06	7.01659e-05
1752	9.6592e-05	2.02742e-05	9.55716e-05	9.99376e-05	7.00955e-05	0.00010198	6.5602e-06	7.01445e-05
1753	9.6592e-05	2.02742e-05	9.55716e-05	9.99376e-05	7.00955e-05	0.00010198	6.5602e-06	7.01445e-05
1754	9.6592e-05	2.02742e-05	9.55716e-05	9.99376e-05	7.00955e-05	0.00010198	6.5602e-06	7.01445e-05
1755	9.6866e-05	2.02742e-05	9.55716e-05	9.98272e-05	7.00955e-05	0.00010198	6.5602e-06	7.01678e-05
1756	9.6866e-05	2.02742e-05	9.52863e-05	9.98272e-05	7.00955e-05	0.00010198	6.5602e-06	7.01271e-05
1757	9.6866e-05	2.02742e-05	9.52863e-05	9.98272e-05	7.00955e-05	0.00010198	6.5602e-06	7.01271e-05
1758	9.6866e-05	2.02742e-05	9.52863e-05	9.96063e-05	7.00955e-05	0.00010198	6.5602e-06	7.00955e-05
1759	9.6866e-05	2.02742e-05	9.52863e-05	9.96063e-05	7.00955e-05	0.00010198	6.5602e-06	7.00955e-05
1760	9.6866e-05	2.02742e-05	9.52863e-05	9.96063e-05	7.00955e-05	0.00010198	6.5602e-06	7.00955e-05
1761	9.6866e-05	2.02742e-05	9.52863e-05	9.96063e-05	7.00955e-05	0.00010198	6.5602e-06	7.00955e-05
1762	9.6866e-05	2.02742e-05	9.52863e-05	9.96063e-05	7.00955e-05	0.00010198	6.5602e-06	7.00955e-05
1763	9.6866e-05	2.02742e-05	9.52863e-05	9.96063e-05	7.00955e-05	0.00010198	6.5602e-06	7.00955e-05
1764	9.6866e-05	2.02742e-05	9.52863e-05	9.94959e-05	7.00955e-05	0.00010198	6.5602e-06	7.00797e-05
1765	9.6866e-05	2.02742e-05	9.52863e-05	9.94959e-05	7.00955e-05	0.00010198	6.5602e-06	7.00797e-05
1766	9.6866e-05	1.97915e-05	9.52863e-05	9.89438e-05	7.00955e-05	0.000101231	6.5602e-06	6.98249e-05
1767	8.5373e-05	1.93088e-05	8.38747e-05	9.09929e-05	6.53163e-05	9.64394e-05	6.5602e-06	6.39808e-05
1768	8.3732e-05	1.93088e-05	8.27336e-05	8.81218e-05	6.45197e-05	9.46424e-05	6.5602e-06	6.28026e-05
1769	1.0945e-06	2.89631e-06	1.42644e-06	1.65642e-06	2.38962e-06	1.49751e-06	6.5602e-06	2.50301e-06
1770	0.00018361	0.000128886	0.000132374	0.000101594	6.61128e-05	0.000110067	3.9361e-05	0.000108857
1771	0.00018552	0.000129851	0.000134085	0.00010325	6.61128e-05	0.000111564	3.9361e-05	0.000109964
1772	0.0001858	0.000129851	0.000134371	0.000103582	6.61128e-05	0.000111564	3.9361e-05	0.000110091
1773	0.00018689	0.000129851	0.000134656	0.000103913	6.61128e-05	0.000111864	3.9361e-05	0.000110378
1774	0.00018689	0.000129851	0.000134941	0.000103913	6.61128e-05	0.000112013	3.9361e-05	0.000110441
1775	0.00018689	0.000129851	0.000134941	0.000104023	6.61128e-05	0.000112163	3.9361e-05	0.000110478
1776	0.00018689	0.000129851	0.000134941	0.000104023	6.61128e-05	0.000112163	3.9361e-05	0.000110478
1777	0.00018689	0.000129851	0.000134941	0.000104023	6.61128e-05	0.000112163	3.9361e-05	0.000110478
1778	0.00018689	0.000129851	0.000134941	0.000104023	6.61128e-05	0.000112163	3.9361e-05	0.000110478
1779	0.00018689	0.000129851	0.000134941	0.000104023	6.61128e-05	0.000112163	3.9361e-05	0.000110478
1780	0.00018689	0.000130334	0.000134941	0.000104244	6.69093e-05	0.000112163	3.9361e-05	0.000110692
1781	0.00018689	0.000130334	0.000134941	0.000104244	6.69093e-05	0.000112163	3.9361e-05	0.000110692
1782	0.00018689	0.000130334	0.000134941	0.000104244	6.69093e-05	0.000112163	3.9361e-05	0.000110692
1783	0.00018689	0.000130334	0.000134941	0.000104244	6.69093e-05	0.000112163	3.9361e-05	0.000110692
1784	0.00018689	0.000130334	0.000134941	0.000104244	6.69093e-05	0.000112013	3.9361e-05	0.000110671
1785	0.00018689	0.000130334	0.000134941	0.000104244	6.69093e-05	0.000112013	3.9361e-05	0.000110671
1786	0.00018689	0.000130334	0.000134941	0.000104244	6.69093e-05	0.000111864	3.9361e-05	0.000110649
1787	0.00018689	0.000130334	0.000134941	0.000104244	6.69093e-05	0.000111714	3.9361e-05	0.000110628
1788	0.00018689	0.000130334	0.000135227	0.000104244	6.69093e-05	0.000111864	3.9361e-05	0.00011069
1789	0.00018005	0.000126472	0.000127524	0.000102367	6.37232e-05	0.000110067	3.9361e-05	0.000107081
1790	0.00016117	0.000114887	0.000111548	9.58518e-05	5.97405e-05	0.000101231	3.2801e-05	9.6747e-05
1791	0.00014612	0.000105715	0.000100136	9.14346e-05	5.73509e-05	9.59902e-05	3.2801e-05	8.99354e-05
1792	0.00012833	9.84747e-05	8.75835e-05	8.51402e-05	5.33682e-05	8.89519e-05	2.6241e-05	8.11561e-05
1793	8.0174e-05	8.06141e-05	6.50457e-05	6.71404e-05	4.69959e-05	7.30783e-05	2.6241e-05	6.27557e-05
1794	2.3806e-05	3.86175e-05	2.28231e-05	3.52266e-05	1.59308e-05	3.81864e-05	6.5602e-06	2.58787e-05
1795	2.5174e-05	3.86175e-05	2.33936e-05	4.11898e-05	1.83204e-05	4.25292e-05	6.5602e-06	2.79693e-05
1796	2.3532e-05	3.52385e-05	2.22525e-05	3.72143e-05	1.67273e-05	3.92347e-05	6.5602e-06	2.58228e-05
1797	2.3806e-05	3.52385e-05	2.16819e-05	3.72143e-05	1.67273e-05	3.92347e-05	6.5602e-06	2.57804e-05
1798	2.3532e-05	3.47558e-05	2.13966e-05	3.64413e-05	1.67273e-05	3.72879e-05	6.5602e-06	2.52431e-05
1799	7.1144e-06	1.64125e-05	9.41451e-06	1.92145e-05	4.77924e-06	1.96173e-05	6.5602e-06	1.18732e-05
1800	9.8508e-06	1.64125e-05	1.05557e-05	2.33004e-05	4.77924e-06	2.18636e-05	0	1.23946e-05
1801	1.0124e-05	1.64125e-05	1.05557e-05	2.34108e-05	4.77924e-06	2.20133e-05	0	1.24708e-05
1802	1.0124e-05	1.64125e-05	1.05557e-05	2.35212e-05	4.77924e-06	2.20133e-05	0	1.24866e-05
1803	8.209e-06	1.30334e-05	8.55865e-06	2.13127e-05	3.9827e-06	1.97671e-05	0	1.06948e-05
1804	7.1144e-06	6.75807e-06	5.99105e-06	1.79998e-05	3.9827e-06	1.63228e-05	0	8.30984e-06
1805	8.4826e-06	6.75807e-06	6.56163e-06	2.27482e-05	4.77924e-06	1.97671e-05	0	9.87098e-06
1806	8.4826e-06	6.27535e-06	5.70576e-06	2.24169e-05	4.77924e-06	1.90183e-05	0	9.52546e-06
1807	8.4826e-06	6.27535e-06	5.70576e-06	2.29691e-05	4.77924e-06	1.91681e-05	0	9.62573e-06
1808	8.4826e-06	6.27535e-06	5.70576e-06	2.29691e-05	4.77924e-06	1.91681e-05	0	9.62573e-06
1809	8.4826e-06	4.82719e-06	5.42048e-06	2.19752e-05	4.77924e-06	1.76706e-05	0	9.02219e-06
1810	8.4826e-06	2.89631e-06	5.42048e-06	2.12022e-05	4.77924e-06	1.61731e-05	0	8.42199e-06
1811	1.0398e-05	2.89631e-06	7.41749e-06	2.87114e-05	7.9654e-06	2.33611e-05	0	1.15357e-05
1812	1.0398e-05	2.89631e-06	7.41749e-06	2.88218e-05	7.9654e-06	2.36606e-05	0	1.15942e-05
1813	9.5771e-06	1.93088e-06	5.42048e-06	2.70549e-05	7.16886e-06	2.14143e-05	0	1.03667e-05
1814	1.4229e-05	6.27535e-06	1.02704e-05	4.18523e-05	7.16886e-06	3.38436e-05	0	1.62342e-05
1815	1.4229e-05	6.27535e-06	1.02704e-05	4.20732e-05	7.16886e-06	3.41431e-05	0	1.63085e-05
1816	1.4229e-05	6.27535e-06	1.02704e-05	4.20732e-05	7.16886e-06	3.41431e-05	0	1.63085e-05
1817	1.4229e-05	6.27535e-06	1.02704e-05	4.21836e-05	7.16886e-06	3.41431e-05	0	1.63243e-05
1818	1.4229e-05	5.79263e-06	1.02704e-05	4.21836e-05	7.16886e-06	3.41431e-05	0	1.62554e-05
1819	1.3134e-05	5.79263e-06	9.6998e-06	4.04168e-05	7.16886e-06	3.17471e-05	0	1.54228e-05
1820	1.3408e-05	5.79263e-06	9.6998e-06	4.20732e-05	7.16886e-06	3.33944e-05	0	1.59338e-05
1821	1.3408e-05	5.79263e-06	9.6998e-06	4.1521e-05	7.16886e-06	3.32446e-05	0	1.58336e-05
1822	1.1766e-05	5.30991e-06	8.84394e-06	3.78769e-05	6.37232e-06	3.11481e-05	0	1.44739e-05
1823	2.7911e-05	9.17166e-06	1.91143e-05	5.21222e-05	1.19481e-05	4.71715e-05	0	2.39197e-05
1824	2.8458e-05	9.17166e-06	1.99702e-05	5.26743e-05	1.19481e-05	4.73212e-05	0	2.42205e-05
1825	2.9005e-05	9.17166e-06	2.11113e-05	5.34473e-05	1.19481e-05	4.82197e-05	0	2.47004e-05
1826	2.9005e-05	9.17166e-06	2.11113e-05	5.34473e-05	1.19481e-05	4.83695e-05	0	2.47218e-05
1827	2.9552e-05	9.17166e-06	2.11113e-05	5.33369e-05	1.19481e-05	4.83695e-05	0	2.47842e-05
1828	2.9826e-05	9.17166e-06	2.11113e-05	5.35577e-05	1.19481e-05	4.83695e-05	0	2.48549e-05
1829	2.9826e-05	9.65438e-06	2.11113e-05	5.36682e-05	1.19481e-05	4.82197e-05	0	2.49182e-05
1830	3.01e-05	1.01371e-05	2.11113e-05	5.44412e-05	1.19481e-05	4.94177e-05	0	2.53079e-05
1831	3.01e-05	1.01371e-05	2.11113e-05	5.44412e-05	1.19481e-05	4.94177e-05	0	2.53079e-05
1832	3.1194e-05	1.11025e-05	2.19672e-05	5.53246e-05	1.19481e-05	4.94177e-05	0	2.58506e-05
1833	3.1194e-05	1.11025e-05	2.19672e-05	5.5435e-05	1.27446e-05	4.95675e-05	0	2.60016e-05
1834	3.1194e-05	1.06198e-05	2.19672e-05	5.51037e-05	1.27446e-05	4.9268e-05	0	2.58425e-05
1835	3.092e-05	1.06198e-05	2.19672e-05	5.47724e-05	1.19481e-05	4.8669e-05	0	2.55567e-05
1836	3.2015e-05	1.06198e-05	2.31083e-05	5.57663e-05	1.27446e-05	4.94177e-05	0	2.62388e-05
1837	3.2015e-05	1.06198e-05	2.31083e-05	5.60976e-05	1.27446e-05	4.94177e-05	0	2.62862e-05
1838	3.2015e-05	1.06198e-05	2.31083e-05	5.60976e-05	1.27446e-05	4.94177e-05	0	2.62862e-05
1839	3.2015e-05	1.06198e-05	2.31083e-05	5.6208e-05	1.27446e-05	4.94177e-05	0	2.63019e-05
1840	3.2289e-05	9.65438e-06	2.31083e-05	5.6208e-05	1.27446e-05	4.94177e-05	0	2.62031e-05
1841	3.2289e-05	9.65438e-06	2.31083e-05	5.6208e-05	1.27446e-05	4.9268e-05	0	2.61817e-05
1842	3.2015e-05	9.65438e-06	2.31083e-05	5.6208e-05	1.27446e-05	4.9268e-05	0	2.61426e-05
1843	3.2015e-05	9.65438e-06	2.31083e-05	5.60976e-05	1.27446e-05	4.9268e-05	0	2.61268e-05
1844	3.2015e-05	9.65438e-06	2.31083e-05	5.59872e-05	1.27446e-05	4.9268e-05	0	2.61111e-05
1845	3.1741e-05	9.65438e-06	2.28231e-05	5.59872e-05	1.27446e-05	4.91182e-05	0	2.60098e-05
1846	3.1741e-05	9.65438e-06	2.25378e-05	5.55454e-05	1.27446e-05	4.89685e-05	0	2.58846e-05
1847	3.1741e-05	9.65438e-06	2.25378e-05	5.55454e-05	1.27446e-05	4.88187e-05	0	2.58632e-05
1848	3.0647e-05	9.65438e-06	2.13966e-05	5.16804e-05	1.27446e-05	4.58237e-05	0	2.45638e-05
1849	3.01e-05	9.17166e-06	2.13966e-05	5.157e-05	1.27446e-05	4.59734e-05	0	2.44223e-05
1850	2.9005e-05	9.17166e-06	1.96849e-05	4.95823e-05	9.55848e-06	4.29784e-05	0	2.28544e-05
1851	2.709e-05	9.17166e-06	1.96849e-05	4.79259e-05	9.55848e-06	4.02829e-05	0	2.19591e-05
1852	3.5572e-06	9.65438e-07	1.14115e-06	6.18399e-06	7.9654e-07	3.74377e-06	0	2.34116e-06
1853	4.3781e-06	1.93088e-06	1.71173e-06	8.50298e-06	7.9654e-07	4.94177e-06	0	3.18029e-06
1854	4.3781e-06	1.44816e-06	1.71173e-06	8.39255e-06	7.9654e-07	4.94177e-06	0	3.09555e-06
1855	3.01e-06	1.44816e-06	8.55865e-07	6.18399e-06	7.9654e-07	3.29451e-06	0	2.227e-06
1856	4.9254e-06	2.89631e-06	3.13817e-06	1.19263e-05	1.59308e-06	8.38604e-06	0	4.69503e-06
1857	4.9254e-06	3.37903e-06	3.42346e-06	1.25888e-05	3.18616e-06	8.83529e-06	0	5.19116e-06
1858	4.6518e-06	3.37903e-06	3.42346e-06	1.25888e-05	3.18616e-06	8.83529e-06	0	5.15207e-06
1859	4.6518e-06	3.86175e-06	3.42346e-06	1.26993e-05	3.18616e-06	8.83529e-06	0	5.23681e-06
1860	4.6518e-06	3.86175e-06	3.42346e-06	1.26993e-05	3.9827e-06	8.68554e-06	1.312e-05	7.20356e-06
1861	4.6518e-06	3.86175e-06	3.42346e-06	1.28097e-05	3.9827e-06	8.53579e-06	1.312e-05	7.19794e-06
1862	4.6518e-06	3.86175e-06	3.42346e-06	1.33618e-05	3.9827e-06	8.68554e-06	1.312e-05	7.29821e-06
1863	4.6518e-06	4.34447e-06	3.42346e-06	1.33618e-05	3.9827e-06	8.83529e-06	1.312e-05	7.38856e-06
1864	4.6518e-06	4.34447e-06	3.42346e-06	1.34723e-05	3.9827e-06	8.83529e-06	1.312e-05	7.40434e-06
1865	3.5572e-06	4.34447e-06	3.42346e-06	1.24784e-05	4.77924e-06	8.53579e-06	1.312e-05	7.177e-06
1866	3.5572e-06	4.34447e-06	3.70875e-06	1.18158e-05	5.57578e-06	7.78703e-06	1.312e-05	7.12993e-06
1867	1.0945e-05	1.35161e-05	1.36938e-05	2.14231e-05	1.59308e-05	1.88686e-05	3.2801e-05	1.81684e-05
1868	1.0945e-05	1.35161e-05	1.39791e-05	2.16439e-05	1.59308e-05	1.88686e-05	3.2801e-05	1.82407e-05
1869	1.0945e-05	1.39989e-05	1.42644e-05	2.17544e-05	1.59308e-05	1.88686e-05	3.2801e-05	1.83662e-05
1870	1.0945e-05	1.39989e-05	1.42644e-05	2.17544e-05	1.67273e-05	1.88686e-05	3.2801e-05	1.848e-05
1871	1.0945e-05	1.39989e-05	1.42644e-05	2.17544e-05	1.67273e-05	1.88686e-05	3.2801e-05	1.848e-05
1872	1.0945e-05	1.39989e-05	1.39791e-05	2.14231e-05	1.67273e-05	1.87188e-05	3.2801e-05	1.83705e-05
1873	2.7911e-05	4.44102e-05	4.76431e-05	3.76561e-05	3.50478e-05	3.78869e-05	5.9042e-05	4.13709e-05
1874	2.7911e-05	4.58583e-05	4.76431e-05	3.79873e-05	3.50478e-05	3.80367e-05	5.9042e-05	4.16465e-05
1875	2.7637e-05	4.58583e-05	4.76431e-05	3.80978e-05	3.50478e-05	3.83362e-05	5.9042e-05	4.1666e-05
1876	2.7637e-05	4.6341e-05	4.76431e-05	3.82082e-05	3.50478e-05	3.81864e-05	5.9042e-05	4.17293e-05
1877	2.7637e-05	4.6341e-05	4.76431e-05	3.80978e-05	3.50478e-05	3.81864e-05	5.9042e-05	4.17136e-05
1878	2.7363e-05	4.48929e-05	4.70726e-05	3.62205e-05	3.50478e-05	3.68387e-05	5.9042e-05	4.09254e-05
1879	2.7363e-05	4.48929e-05	4.73578e-05	3.54475e-05	3.50478e-05	3.68387e-05	5.9042e-05	4.08557e-05
1880	2.7911e-05	4.48929e-05	4.73578e-05	3.56683e-05	3.50478e-05	3.68387e-05	5.9042e-05	4.09654e-05
1881	2.7911e-05	4.48929e-05	4.73578e-05	3.56683e-05	3.50478e-05	3.69884e-05	5.9042e-05	4.09868e-05
1882	2.7637e-05	4.48929e-05	4.70726e-05	3.32389e-05	3.42512e-05	3.51914e-05	5.9042e-05	4.01894e-05
1883	2.9826e-05	4.48929e-05	4.87843e-05	3.61101e-05	3.58443e-05	3.89352e-05	5.9042e-05	4.19192e-05
1884	2.9826e-05	4.48929e-05	4.87843e-05	3.62205e-05	3.58443e-05	3.89352e-05	5.9042e-05	4.1935e-05
1885	2.9826e-05	4.48929e-05	4.87843e-05	3.62205e-05	3.58443e-05	3.89352e-05	5.9042e-05	4.1935e-05
1886	2.7363e-05	4.34447e-05	4.56461e-05	3.16929e-05	3.50478e-05	3.48919e-05	5.2482e-05	3.86526e-05
1887	2.8731e-05	4.44102e-05	4.82137e-05	3.40119e-05	3.50478e-05	3.68387e-05	5.2482e-05	3.99622e-05
1888	2.8731e-05	4.44102e-05	4.76431e-05	3.40119e-05	3.50478e-05	3.66889e-05	5.2482e-05	3.98593e-05
1889	2.8731e-05	4.44102e-05	4.76431e-05	3.40119e-05	3.50478e-05	3.65392e-05	5.2482e-05	3.98379e-05
1890	2.8731e-05	4.39274e-05	4.73578e-05	3.40119e-05	3.50478e-05	3.63894e-05	5.2482e-05	3.97068e-05
1891	2.8731e-05	4.39274e-05	4.73578e-05	3.40119e-05	3.50478e-05	3.63894e-05	5.2482e-05	3.97068e-05
1892	2.8731e-05	4.34447e-05	4.70726e-05	3.39015e-05	3.50478e-05	3.63894e-05	5.2482e-05	3.95813e-05
1893	2.6816e-05	3.71694e-05	3.99404e-05	3.06991e-05	3.10651e-05	3.24959e-05	5.2482e-05	3.58096e-05
1894	2.0522e-05	2.65496e-05	2.967e-05	2.36317e-05	2.54893e-05	2.60566e-05	3.2801e-05	2.63887e-05
1895	2.0249e-05	2.55841e-05	2.68171e-05	2.31899e-05	2.46927e-05	2.51581e-05	3.9361e-05	2.6436e-05
1896	7.1144e-06	5.79263e-06	5.99105e-06	1.06011e-05	6.37232e-06	9.58404e-06	1.9681e-05	9.30518e-06
1897	1.0398e-05	1.30334e-05	1.05557e-05	1.51287e-05	7.9654e-06	1.36273e-05	1.9681e-05	1.29127e-05
1898	1.0124e-05	1.35161e-05	1.05557e-05	1.53495e-05	7.9654e-06	1.31781e-05	1.9681e-05	1.291e-05
1899	9.8508e-06	1.39989e-05	1.05557e-05	1.546e-05	7.9654e-06	1.33278e-05	1.9681e-05	1.2977e-05
1900	9.5771e-06	1.5447e-05	1.19821e-05	1.56808e-05	7.9654e-06	1.45258e-05	2.6241e-05	1.44884e-05
1901	1.0124e-05	1.59297e-05	1.36938e-05	1.57912e-05	7.16886e-06	1.46756e-05	2.6241e-05	1.48035e-05
1902	9.8508e-06	1.59297e-05	1.45497e-05	1.55704e-05	7.16886e-06	1.42263e-05	2.6241e-05	1.47909e-05
1903	7.6617e-06	1.5447e-05	1.39791e-05	1.19263e-05	5.57578e-06	1.15308e-05	2.6241e-05	1.31945e-05
1904	1.3134e-05	2.07569e-05	2.28231e-05	2.05397e-05	1.43377e-05	2.11148e-05	2.6241e-05	1.98496e-05
1905	1.3134e-05	2.07569e-05	2.28231e-05	2.07605e-05	1.51343e-05	2.12646e-05	2.6241e-05	2.00164e-05
1906	1.3134e-05	2.07569e-05	2.28231e-05	2.07605e-05	1.51343e-05	2.12646e-05	2.6241e-05	2.00164e-05
1907	1.3408e-05	2.22051e-05	2.31083e-05	2.12022e-05	1.51343e-05	2.21631e-05	2.6241e-05	2.04946e-05
1908	1.3682e-05	2.22051e-05	2.31083e-05	2.12022e-05	1.51343e-05	2.17138e-05	2.6241e-05	2.04695e-05
1909	1.3408e-05	2.22051e-05	2.31083e-05	2.09814e-05	1.51343e-05	2.09651e-05	2.6241e-05	2.02919e-05
1910	1.3134e-05	2.22051e-05	2.31083e-05	2.06501e-05	1.51343e-05	2.14143e-05	2.6241e-05	2.02696e-05
1911	1.2861e-05	2.22051e-05	2.28231e-05	2.09814e-05	1.51343e-05	2.11148e-05	2.6241e-05	2.01943e-05
1912	1.2861e-05	2.22051e-05	2.19672e-05	2.02084e-05	1.51343e-05	2.06656e-05	2.6241e-05	1.98974e-05
1913	1.1766e-05	1.93088e-05	2.05408e-05	1.92145e-05	1.43377e-05	1.97671e-05	1.312e-05	1.68651e-05
1914	1.4776e-05	2.46187e-05	2.28231e-05	2.34108e-05	1.67273e-05	2.35108e-05	1.312e-05	1.98553e-05
1915	1.4776e-05	2.46187e-05	2.28231e-05	2.33004e-05	1.67273e-05	2.35108e-05	1.312e-05	1.98396e-05
1916	1.4776e-05	2.46187e-05	2.28231e-05	2.30795e-05	1.67273e-05	2.35108e-05	1.312e-05	1.9808e-05
1917	1.3955e-05	2.26878e-05	2.25378e-05	2.17544e-05	1.59308e-05	2.20133e-05	1.312e-05	1.88571e-05
1918	1.2861e-05	1.78606e-05	2.05408e-05	1.96562e-05	1.59308e-05	2.11148e-05	6.5602e-06	1.63606e-05
1919	1.5597e-05	3.18595e-05	3.28081e-05	2.51777e-05	2.23031e-05	3.11481e-05	3.2801e-05	2.73849e-05
1920	1.5597e-05	3.33076e-05	3.30934e-05	2.56194e-05	2.38962e-05	3.17471e-05	3.2801e-05	2.80088e-05
1921	1.5597e-05	4.24793e-05	3.70875e-05	2.76071e-05	2.54893e-05	3.30949e-05	3.9361e-05	3.15309e-05
1922	1.6144e-05	4.87546e-05	4.27932e-05	2.99261e-05	2.62858e-05	3.50416e-05	5.2482e-05	3.59182e-05
1923	1.6144e-05	5.16509e-05	4.47903e-05	3.04782e-05	2.78789e-05	3.53411e-05	4.5922e-05	3.60293e-05
1924	1.5597e-05	5.21337e-05	4.4505e-05	3.02574e-05	2.70824e-05	3.45924e-05	4.5922e-05	3.5727e-05
1925	1.505e-05	5.21337e-05	4.36491e-05	2.98156e-05	2.70824e-05	3.42929e-05	4.5922e-05	3.54207e-05
1926	1.505e-05	5.21337e-05	4.36491e-05	2.98156e-05	2.70824e-05	3.41431e-05	4.5922e-05	3.53993e-05
1927	1.4776e-05	5.16509e-05	4.22227e-05	2.91531e-05	2.62858e-05	3.33944e-05	4.5922e-05	3.47721e-05
1928	1.2587e-05	4.77892e-05	3.70875e-05	2.59507e-05	2.30997e-05	2.96506e-05	4.5922e-05	3.17266e-05
1929	1.2587e-05	4.77892e-05	3.70875e-05	2.62819e-05	2.38962e-05	2.96506e-05	4.5922e-05	3.18877e-05
1930	1.2587e-05	4.77892e-05	3.70875e-05	2.59507e-05	2.38962e-05	2.95009e-05	4.5922e-05	3.1819e-05
1931	1.2313e-05	4.6341e-05	3.62316e-05	2.40734e-05	2.30997e-05	2.81531e-05	4.5922e-05	3.08763e-05
1932	1.2313e-05	4.6341e-05	3.65169e-05	2.39629e-05	2.30997e-05	2.80034e-05	4.5922e-05	3.08798e-05
1933	1.2313e-05	4.6341e-05	3.65169e-05	2.39629e-05	2.30997e-05	2.80034e-05	4.5922e-05	3.08798e-05
1934	1.1493e-05	4.53756e-05	3.48052e-05	2.26378e-05	2.23031e-05	2.60566e-05	4.5922e-05	2.97989e-05
1935	1.0945e-05	4.44102e-05	3.42346e-05	2.21961e-05	2.15066e-05	2.54576e-05	4.5922e-05	2.92388e-05
1936	1.0672e-05	4.34447e-05	3.39493e-05	2.13127e-05	1.99135e-05	2.45591e-05	4.5922e-05	2.85389e-05
1937	1.0672e-05	4.34447e-05	3.39493e-05	2.09814e-05	1.9117e-05	2.39601e-05	4.5922e-05	2.82922e-05
1938	9.3035e-06	4.19966e-05	3.19523e-05	1.89937e-05	1.9117e-05	2.03661e-05	4.5922e-05	2.68072e-05
1939	6.8408e-06	3.71694e-05	2.79582e-05	1.59017e-05	1.59308e-05	1.67721e-05	3.2801e-05	2.19106e-05
1940	6.8408e-06	3.57212e-05	2.71024e-05	1.546e-05	1.43377e-05	1.57238e-05	3.2801e-05	2.1141e-05
1941	3.8309e-06	3.04113e-05	2.05408e-05	1.17054e-05	1.0355e-05	1.22796e-05	2.6241e-05	1.64805e-05
1942	2.7363e-06	1.78606e-05	1.05557e-05	6.73613e-06	5.57578e-06	4.79202e-06	1.312e-05	8.76814e-06
1943	2.7363e-06	1.78606e-05	1.05557e-05	6.73613e-06	5.57578e-06	4.79202e-06	6.5602e-06	7.83096e-06
1944	5.4726e-07	5.30991e-06	2.28231e-06	1.65642e-06	2.38962e-06	8.98504e-07	6.5602e-06	2.80632e-06
1945	5.4726e-07	6.75807e-06	3.13817e-06	2.31899e-06	2.38962e-06	1.79701e-06	0	2.4213e-06
1946	1.0945e-06	6.75807e-06	4.8499e-06	3.53371e-06	3.18616e-06	2.39601e-06	0	3.11691e-06
1947	8.209e-07	4.82719e-06	3.13817e-06	2.98156e-06	1.59308e-06	2.09651e-06	0	2.2082e-06
1948	1.9154e-06	7.72351e-06	5.13519e-06	6.07356e-06	2.38962e-06	5.54077e-06	0	4.11115e-06
1949	2.4627e-06	7.72351e-06	5.13519e-06	5.96313e-06	2.38962e-06	5.69052e-06	0	4.19495e-06
1950	2.7363e-06	7.72351e-06	5.13519e-06	6.07356e-06	2.38962e-06	5.84027e-06	0	4.27121e-06
1951	2.7363e-06	7.72351e-06	5.42048e-06	6.07356e-06	2.38962e-06	5.84027e-06	0	4.31197e-06
1952	2.7363e-06	7.72351e-06	5.42048e-06	6.07356e-06	2.38962e-06	5.84027e-06	0	4.31197e-06
1953	3.01e-06	7.72351e-06	5.13519e-06	5.8527e-06	2.38962e-06	5.84027e-06	0	4.27875e-06
1954	1.7512e-05	1.44816e-05	1.39791e-05	1.68955e-05	5.57578e-06	1.45258e-05	0	1.18529e-05
1955	1.7512e-05	1.44816e-05	1.42644e-05	1.72268e-05	6.37232e-06	1.46756e-05	0	1.20762e-05
1956	1.7786e-05	1.44816e-05	1.42644e-05	1.74477e-05	6.37232e-06	1.48253e-05	0	1.21682e-05
1957	1.806e-05	1.44816e-05	1.45497e-05	1.75581e-05	6.37232e-06	1.48253e-05	0	1.22638e-05
1958	1.8333e-05	1.44816e-05	1.45497e-05	1.75581e-05	6.37232e-06	1.48253e-05	0	1.23029e-05
1959	1.8333e-05	1.44816e-05	1.45497e-05	1.75581e-05	6.37232e-06	1.48253e-05	0	1.23029e-05
1960	1.8333e-05	1.44816e-05	1.45497e-05	1.75581e-05	6.37232e-06	1.48253e-05	0	1.23029e-05
1961	1.8333e-05	1.39989e-05	1.45497e-05	1.75581e-05	5.57578e-06	1.48253e-05	0	1.21202e-05
1962	1.8333e-05	1.39989e-05	1.45497e-05	1.75581e-05	5.57578e-06	1.48253e-05	0	1.21202e-05
1963	1.8333e-05	1.39989e-05	1.45497e-05	1.75581e-05	5.57578e-06	1.48253e-05	0	1.21202e-05
1964	1.8333e-05	1.35161e-05	1.42644e-05	1.73372e-05	5.57578e-06	1.46756e-05	0	1.19575e-05
1965	1.7786e-05	1.06198e-05	1.25527e-05	1.59017e-05	4.77924e-06	1.36273e-05	0	1.07524e-05
1966	1.8881e-05	1.11025e-05	1.42644e-05	1.76685e-05	4.77924e-06	1.63228e-05	0	1.18597e-05
1967	1.8881e-05	1.11025e-05	1.42644e-05	1.7779e-05	4.77924e-06	1.63228e-05	0	1.18755e-05
1968	1.8881e-05	1.11025e-05	1.42644e-05	1.7779e-05	4.77924e-06	1.63228e-05	0	1.18755e-05
1969	1.8881e-05	1.11025e-05	1.42644e-05	1.7779e-05	4.77924e-06	1.63228e-05	0	1.18755e-05
1970	1.8881e-05	1.11025e-05	1.42644e-05	1.7779e-05	4.77924e-06	1.63228e-05	0	1.18755e-05
1971	1.8881e-05	1.11025e-05	1.42644e-05	1.73372e-05	4.77924e-06	1.58736e-05	0	1.17482e-05
1972	1.8881e-05	1.11025e-05	1.42644e-05	1.73372e-05	4.77924e-06	1.58736e-05	0	1.17482e-05
1973	1.806e-05	9.65438e-06	1.39791e-05	1.73372e-05	4.77924e-06	1.55741e-05	0	1.13405e-05
1974	1.5597e-05	8.20623e-06	9.98509e-06	1.60121e-05	4.77924e-06	1.40766e-05	0	9.80804e-06
1975	1.2587e-05	6.27535e-06	7.13221e-06	1.42453e-05	3.18616e-06	1.18303e-05	0	7.89377e-06
1976	9.8508e-06	6.27535e-06	6.27634e-06	1.30305e-05	3.18616e-06	1.04825e-05	0	7.01453e-06
1977	2.7363e-06	2.4136e-06	2.28231e-06	5.52142e-06	7.9654e-07	5.24127e-06	0	2.71306e-06
1978	3.2836e-06	2.4136e-06	2.56759e-06	5.96313e-06	1.59308e-06	5.69052e-06	0	3.07307e-06
1979	3.01e-06	2.4136e-06	2.28231e-06	5.74227e-06	1.59308e-06	5.69052e-06	0	2.96168e-06
1980	2.4627e-06	1.93088e-06	2.28231e-06	3.97542e-06	7.9654e-07	4.94177e-06	0	2.34137e-06
1981	3.01e-06	2.4136e-06	2.56759e-06	4.19628e-06	1.59308e-06	5.54077e-06	0	2.76018e-06
1982	3.01e-06	2.4136e-06	2.56759e-06	4.19628e-06	1.59308e-06	5.54077e-06	0	2.76018e-06
1983	3.01e-06	2.4136e-06	2.56759e-06	3.53371e-06	1.59308e-06	4.94177e-06	0	2.57996e-06
1984	3.01e-06	4.82719e-06	2.85288e-06	4.74842e-06	1.59308e-06	5.54077e-06	0	3.22461e-06
1985	3.01e-06	4.82719e-06	2.85288e-06	4.74842e-06	1.59308e-06	5.69052e-06	0	3.24601e-06
1986	3.01e-06	3.86175e-06	1.99702e-06	3.97542e-06	1.59308e-06	4.94177e-06	0	2.76843e-06
1987	4.1045e-06	3.86175e-06	2.28231e-06	5.41099e-06	3.18616e-06	7.63728e-06	0	3.78328e-06
1988	4.1045e-06	3.86175e-06	2.28231e-06	5.41099e-06	3.18616e-06	7.63728e-06	0	3.78328e-06
1989	4.1045e-06	3.86175e-06	2.28231e-06	5.30056e-06	3.18616e-06	7.63728e-06	0	3.76751e-06
1990	4.1045e-06	3.86175e-06	2.28231e-06	5.30056e-06	3.18616e-06	7.63728e-06	0	3.76751e-06
1991	4.1045e-06	3.37903e-06	2.28231e-06	5.30056e-06	3.18616e-06	7.63728e-06	0	3.69855e-06
1992	3.2836e-06	3.37903e-06	1.71173e-06	4.63799e-06	3.18616e-06	7.18803e-06	0	3.34093e-06
1993	3.5572e-06	4.82719e-06	1.99702e-06	5.8527e-06	3.18616e-06	7.48753e-06	0	3.84397e-06
1994	3.5572e-06	4.82719e-06	1.99702e-06	5.8527e-06	3.18616e-06	7.48753e-06	0	3.84397e-06
1995	3.5572e-06	4.82719e-06	1.99702e-06	6.07356e-06	3.18616e-06	7.48753e-06	0	3.87553e-06
1996	3.01e-06	4.82719e-06	1.42644e-06	5.74227e-06	3.18616e-06	5.84027e-06	0	3.43319e-06
1997	3.01e-06	4.82719e-06	1.42644e-06	6.29441e-06	3.18616e-06	6.43928e-06	0	3.59763e-06
1998	3.01e-06	4.82719e-06	1.42644e-06	6.29441e-06	3.18616e-06	6.43928e-06	0	3.59763e-06
1999	3.01e-06	4.34447e-06	1.42644e-06	5.41099e-06	3.18616e-06	5.69052e-06	0	3.29551e-06
[truncated: 7,180 more rows]

## Sheet: CANC
bp	CLIP33	CLIP34	CLIP45	CLIP46	CLIP48	Average Read Density
1	1.42452e-05	2.05787e-05	1.62933e-05	8.97093e-06	7.83845e-07	1.21744e-05
2	2.66612e-05	3.08034e-05	3.09938e-05	1.22331e-05	1.56769e-06	2.04518e-05
3	3.03749e-05	3.6304e-05	3.41341e-05	1.38642e-05	1.56769e-06	2.3249e-05
4	4.22366e-05	6.16715e-05	5.49332e-05	1.94247e-05	1.56769e-06	3.59667e-05
5	4.43429e-05	6.45189e-05	5.91203e-05	2.00919e-05	1.56769e-06	3.79283e-05
6	4.71144e-05	6.58778e-05	6.16235e-05	2.09816e-05	1.56769e-06	3.9433e-05
7	4.90544e-05	6.78839e-05	6.32164e-05	2.14264e-05	1.56769e-06	4.06298e-05
8	5.54841e-05	7.06019e-05	6.90874e-05	2.31316e-05	1.56769e-06	4.39745e-05
9	6.20247e-05	7.55201e-05	7.69155e-05	2.58748e-05	2.35153e-06	4.85373e-05
10	7.05607e-05	8.06324e-05	8.69737e-05	2.89887e-05	3.13538e-06	5.40582e-05
11	7.2667e-05	8.25738e-05	8.90673e-05	3.03974e-05	3.13538e-06	5.55682e-05
12	7.31104e-05	8.30268e-05	8.94769e-05	3.08422e-05	3.13538e-06	5.59183e-05
13	7.4219e-05	8.33503e-05	9.00685e-05	3.12129e-05	3.13538e-06	5.63972e-05
14	0.000133749	0.000124443	0.00015283	6.49466e-05	1.56769e-05	9.83291e-05
15	0.000136299	0.000125673	0.000155834	6.57621e-05	1.56769e-05	9.9849e-05
16	0.000138627	0.000127355	0.000158883	6.65035e-05	1.64607e-05	0.000101566
17	0.000139957	0.000128196	0.000160066	6.67259e-05	1.64607e-05	0.000102281
18	0.000140567	0.000128585	0.000161705	6.74673e-05	1.64607e-05	0.000102957
19	0.000157307	0.000149358	0.000185781	8.77075e-05	3.29215e-05	0.000122615
20	0.000158249	0.000149681	0.000186463	8.79299e-05	3.29215e-05	0.000123049
21	0.000160078	0.000151493	0.000188784	8.85972e-05	3.29215e-05	0.000124375
22	0.000158304	0.000142304	0.000183414	8.45195e-05	3.29215e-05	0.000120293
23	0.000190397	0.00017822	0.000237118	9.70491e-05	4.07599e-05	0.000148709
24	0.000235239	0.000255875	0.000315672	0.000128484	5.17337e-05	0.000197401
25	0.000244274	0.000266941	0.000331283	0.000130412	5.25176e-05	0.000205086
26	0.000247655	0.0002705	0.000335743	0.000131005	5.25176e-05	0.000207484
27	0.000248431	0.0002716	0.000339475	0.000131302	5.40853e-05	0.000208979
28	0.000248431	0.000271147	0.00033861	0.000130264	5.40853e-05	0.000208507
29	0.000249762	0.000273477	0.000339885	0.000130783	5.40853e-05	0.000209598
30	0.000220384	0.000249727	0.000308709	0.000123814	5.25176e-05	0.00019103
31	0.000371261	0.000342526	0.000453711	0.000162811	5.80045e-05	0.000277663
32	0.000389885	0.00035618	0.000480244	0.000165999	5.87883e-05	0.000290219
33	0.000399918	0.000362652	0.000491713	0.000165999	5.87883e-05	0.000295814
34	0.000408177	0.000370094	0.000499177	0.000166963	5.87883e-05	0.00030064
35	0.000409562	0.000371323	0.000500315	0.000166073	5.87883e-05	0.000301212
36	0.000409396	0.000369705	0.000497721	0.000163182	5.87883e-05	0.000299758
37	0.000414496	0.000387307	0.000510555	0.00016978	6.0356e-05	0.000308499
38	0.000423808	0.000432995	0.000540457	0.00018876	6.5843e-05	0.000330373
39	0.000424417	0.000452279	0.000548603	0.000198324	6.89783e-05	0.00033852
40	0.000424362	0.000458039	0.000549605	0.000199955	6.89783e-05	0.000340188
41	0.000420205	0.000458039	0.000544735	0.000198102	6.5843e-05	0.000337385
42	0.000421535	0.000459721	0.000545827	0.000198843	6.5843e-05	0.000338354
43	0.000420925	0.000459398	0.000545281	0.000198324	6.5843e-05	0.000337954
44	0.000411835	0.000447102	0.000532128	0.000189131	6.19237e-05	0.000328424
45	0.000351917	0.000400962	0.000466773	0.000152728	4.46791e-05	0.000283412
46	0.000365663	0.000420699	0.000480745	0.000166963	5.01661e-05	0.000296847
47	0.000367437	0.000424129	0.000483248	0.000170892	5.17337e-05	0.000299488
48	0.00036145	0.000417334	0.000474282	0.000167408	4.78145e-05	0.000293658
49	0.000352027	0.000412287	0.000464725	0.000165258	4.62468e-05	0.000288109
50	0.000364942	0.000421735	0.000478333	0.000171411	4.70307e-05	0.00029669
51	0.000364166	0.000419793	0.00047633	0.00017067	4.70307e-05	0.000295598
52	0.000364	0.000419793	0.000476012	0.000170596	4.70307e-05	0.000295486
53	0.000363778	0.000418693	0.00047501	0.000170299	4.62468e-05	0.000294805
54	0.000363224	0.000417075	0.000474237	0.00016978	4.62468e-05	0.000294113
55	0.00036073	0.000415716	0.000472917	0.000169187	4.62468e-05	0.000292959
56	0.000348369	0.000376953	0.000447248	0.000158289	4.23276e-05	0.000274637
57	0.000334678	0.000342138	0.000423081	0.000144647	3.60569e-05	0.00025612
58	0.000259295	0.000253093	0.000320132	0.000107058	3.13538e-05	0.000194186
59	0.000259628	0.000252963	0.000319313	0.00010728	3.05699e-05	0.000193951
60	0.000225595	0.000188574	0.000244901	8.74851e-05	2.5083e-05	0.000154328
61	0.000184023	0.000165342	0.000195702	7.87366e-05	1.72446e-05	0.00012821
62	0.00018103	0.000158159	0.000187692	7.65865e-05	1.72446e-05	0.000124142
63	0.000167395	0.00014211	0.000170944	6.97656e-05	1.72446e-05	0.000113492
64	0.000160521	0.000133891	0.000159884	6.66518e-05	1.56769e-05	0.000107325
65	0.000126045	0.000100305	0.000119515	4.91548e-05	1.25415e-05	8.15123e-05
66	0.000141454	0.000109753	0.000137401	5.28617e-05	1.25415e-05	9.08022e-05
67	0.000141565	0.000109818	0.000137356	5.28617e-05	1.25415e-05	9.08284e-05
68	0.000140955	0.000108265	0.000135854	5.2491e-05	1.25415e-05	9.00213e-05
69	0.00011446	8.91098e-05	0.000104678	4.41132e-05	8.62229e-06	7.21967e-05
70	0.000109804	8.67154e-05	0.000100718	4.22597e-05	9.40614e-06	6.97806e-05
71	9.91619e-05	8.08265e-05	9.24807e-05	3.8701e-05	9.40614e-06	6.41152e-05
72	6.8787e-05	6.39364e-05	7.28194e-05	2.63197e-05	8.62229e-06	4.8097e-05
73	7.64916e-05	7.07313e-05	8.29686e-05	3.44751e-05	9.40614e-06	5.48145e-05
74	8.4695e-05	8.03088e-05	9.49383e-05	4.27046e-05	1.019e-05	6.25673e-05
75	6.16921e-05	5.17704e-05	7.64149e-05	3.5513e-05	3.13538e-06	4.57052e-05
76	0.000341829	0.000239956	0.000325594	0.000271426	0.000188123	0.000273386
77	0.000348258	0.000241962	0.000332193	0.000276764	0.00019361	0.000278557
78	0.000348813	0.000242091	0.00033283	0.000276838	0.000194393	0.000278993
79	0.000349256	0.000242156	0.000333012	0.000276764	0.000195177	0.000279273
80	0.000348037	0.000239115	0.000329736	0.00027795	0.000195177	0.000278003
81	0.000356295	0.000247592	0.000339293	0.000290851	0.000203016	0.000287409
82	0.000364443	0.000251086	0.000344572	0.000301824	0.000206935	0.000293772
83	0.000388389	0.000263252	0.000361457	0.000313019	0.000213206	0.000307865
84	0.000387557	0.000262476	0.000360138	0.000314427	0.00021399	0.000307718
85	0.00045906	0.000376565	0.000463678	0.000425266	0.000548691	0.000454652
86	0.000474913	0.000421476	0.000498495	0.000467081	0.00061375	0.000495143
87	0.000487551	0.000447879	0.000518474	0.000498294	0.000645888	0.000519617
88	0.000549686	0.000560285	0.00061232	0.000616325	0.000754842	0.000618692
89	0.000553677	0.00056818	0.000619875	0.000627743	0.000768952	0.000627685
90	0.000555451	0.000573616	0.000623972	0.000632636	0.000776006	0.000632336
91	0.000555506	0.000573163	0.000623061	0.000634563	0.000778358	0.00063293
92	0.000569474	0.000600213	0.000642176	0.000659178	0.000794818	0.000653172
93	0.000568421	0.00059866	0.000639264	0.000657398	0.000795602	0.000651869
94	0.000564153	0.000592124	0.000629114	0.000651912	0.00079717	0.000646895
95	0.000506175	0.000541648	0.000555157	0.000621811	0.000800305	0.000605019
96	0.000668581	0.000833374	0.000769201	0.00103633	0.00148617	0.000958731
97	0.000721847	0.000864825	0.000804109	0.00108697	0.00153163	0.00100188
98	0.000724453	0.000866637	0.000806111	0.00108986	0.00153398	0.00100421
99	0.000723233	0.000866442	0.000804973	0.00109238	0.00153477	0.00100436
100	0.000694133	0.0008535	0.000781262	0.00109697	0.00153947	0.000993068
101	0.0012344	0.00197821	0.00145557	0.00245114	0.0043425	0.00229236
102	0.00125779	0.00202241	0.00149148	0.00251994	0.00446713	0.00235175
103	0.00129637	0.00212492	0.00154614	0.0026419	0.00466701	0.00245527
104	0.0014984	0.0029016	0.00192557	0.00340169	0.00655843	0.00325714
105	0.0015203	0.00297997	0.00196763	0.00349236	0.00669795	0.00333164
106	0.00162251	0.00314965	0.00210717	0.00366236	0.00693154	0.00349465
107	0.0016265	0.0031611	0.0021149	0.00367445	0.006948	0.00350499
108	0.00167012	0.00319482	0.00214981	0.00370915	0.00699425	0.00354363
109	0.00166341	0.00319436	0.00214362	0.00370529	0.00699738	0.00354081
110	0.00168381	0.00320381	0.00215345	0.00371975	0.00702403	0.00355697
111	0.00170421	0.00322115	0.00217352	0.00373309	0.00703971	0.00357434
112	0.00172145	0.00322918	0.00218927	0.00374214	0.00704676	0.00358576
113	0.00170975	0.00321824	0.00217839	0.00373153	0.00704676	0.00357694
114	0.00171363	0.00321708	0.00217985	0.00372761	0.00704128	0.00357589
115	0.00170127	0.00319928	0.00216538	0.00371463	0.00701306	0.00355872
116	0.00172367	0.00322264	0.00218763	0.00373472	0.00702795	0.00357932
117	0.00170986	0.00319132	0.00215964	0.00370017	0.00702168	0.00355654
118	0.00170632	0.00317223	0.00213793	0.00367942	0.00701306	0.00354179
119	0.00174949	0.00320912	0.0021819	0.00369773	0.00701776	0.0035712
120	0.00171086	0.0031281	0.00211959	0.00359786	0.00698092	0.00350747
121	0.00174401	0.00314913	0.00214749	0.00359801	0.00697935	0.0035236
122	0.0017062	0.00307904	0.00208623	0.00349836	0.00694878	0.00346373
123	0.00172666	0.00308442	0.00209925	0.0034799	0.00694251	0.00346655
124	0.00172921	0.00308176	0.00209879	0.00347635	0.00694173	0.00346557
125	0.00169457	0.00300676	0.00203417	0.00339679	0.00691037	0.00340853
126	0.00160106	0.00283993	0.00189604	0.00320158	0.00677007	0.00326173
127	0.0015607	0.00276435	0.0018386	0.00307606	0.0066909	0.00318612
128	0.00147291	0.00262961	0.00173137	0.0028767	0.00635463	0.00301304
129	0.00147363	0.00262664	0.00173156	0.00286751	0.00634757	0.00300938
130	0.00145345	0.00259655	0.00170807	0.00282399	0.00627389	0.00297119
131	0.000946056	0.00197867	0.001218	0.00201193	0.00444832	0.00212059
132	0.000994058	0.00196643	0.00124089	0.00196634	0.00434015	0.00210157
133	0.000998381	0.00193945	0.00123543	0.00193713	0.0042359	0.00206926
134	0.000900605	0.00128099	0.000944468	0.00125526	0.0021932	0.0013149
135	0.000685154	0.000757272	0.000637625	0.000678825	0.00047501	0.000646777
136	0.000711649	0.00078471	0.00067226	0.000701882	0.000479713	0.000670043
137	0.000644968	0.000713849	0.000611956	0.000593416	0.000379381	0.000588714
138	0.000645356	0.000713914	0.000612503	0.000593416	0.000379381	0.000588914
139	0.000644635	0.000712749	0.000611911	0.000590895	0.000377813	0.000587601
140	0.000644524	0.000712167	0.000611365	0.000589783	0.000375462	0.00058666
141	0.000636487	0.000678451	0.000589792	0.000550192	0.000335486	0.000558082
142	0.000620413	0.000640012	0.000567764	0.00051594	0.000303348	0.000529495
143	0.000604394	0.000618462	0.000552745	0.000492808	0.000273562	0.000508394
144	0.000593308	0.000600019	0.000542914	0.000478944	0.000259453	0.000494928
145	0.000563155	0.000531682	0.000496947	0.000413256	0.000192042	0.000439416
146	0.000433508	0.000360193	0.000359182	0.000263271	0.00011209	0.000305649
147	0.000456898	0.000368541	0.000374155	0.000276023	0.000118361	0.000318796
148	0.000456233	0.000366405	0.000372244	0.000273131	0.000116009	0.000316804
149	0.000455236	0.000364205	0.000370924	0.000272464	0.000116009	0.000315768
150	0.000416657	0.00029768	0.000313169	0.000227016	9.17098e-05	0.000269246
151	0.000338891	0.000204946	0.000246357	0.000179863	6.42753e-05	0.000206866
152	0.000270991	0.000152658	0.000201164	0.000147316	6.0356e-05	0.000166497
153	0.000234574	0.000137903	0.000186554	0.00014398	7.83845e-05	0.000156279
154	0.00022504	0.000133826	0.000179682	0.000146278	0.000101116	0.000157188
155	0.00019655	0.000116354	0.000152648	0.000131747	0.000113657	0.000142191
156	0.000117232	8.39975e-05	9.97626e-05	9.63077e-05	9.0926e-05	9.76452e-05
157	0.000313227	0.000177119	0.000193745	0.000174006	0.000160688	0.000203757
158	0.000317883	0.000179255	0.000195975	0.000175563	0.000161472	0.00020603
159	0.000318992	0.000176408	0.000192243	0.000173117	0.000161472	0.000204446
160	0.00032326	0.000177443	0.000191743	0.000173117	0.000160688	0.00020525
161	0.000425082	0.000233679	0.000250226	0.000237693	0.000180284	0.000265393
162	0.000430404	0.000236138	0.000253639	0.000240658	0.000180284	0.000268225
163	0.000437332	0.000240344	0.000258327	0.000245551	0.000180284	0.000272368
164	0.000469924	0.000259111	0.000283859	0.000259712	0.000181852	0.000290892
165	0.000474636	0.000261894	0.000287364	0.000262159	0.000181852	0.000293581
166	0.000501352	0.000285384	0.000314853	0.000280694	0.000190474	0.000314551
167	0.000505177	0.000288814	0.000319222	0.00028314	0.000190474	0.000317365
168	0.000508059	0.000290885	0.00032168	0.000284327	0.000190474	0.000319085
169	0.000508613	0.000291403	0.000321998	0.000283733	0.000190474	0.000319244
170	0.000509057	0.000291467	0.000322044	0.000283511	0.000190474	0.000319311
171	0.000509279	0.000291467	0.00032168	0.000283289	0.000190474	0.000319238
172	0.000500909	0.000284543	0.000308663	0.000270759	0.000186555	0.000310286
173	0.000508558	0.00028629	0.000311212	0.000270759	0.000185771	0.000312518
174	0.000505676	0.000285125	0.000308618	0.000267126	0.000184987	0.000310306
175	0.000506008	0.000284284	0.000307161	0.000265495	0.000184203	0.00030943
176	0.000465545	0.000267718	0.000284178	0.00024266	0.000172446	0.000286509
177	0.000492096	0.000273671	0.000295192	0.000247182	0.000172446	0.000296117
178	0.000491985	0.00027283	0.0002941	0.000245848	0.000171662	0.000295285
179	0.00043251	0.000213488	0.00024258	0.000193431	9.48452e-05	0.000235371
180	0.000485832	0.000240862	0.000273164	0.000225459	0.000100332	0.00026513
181	0.000494978	0.000245003	0.000278807	0.000231835	0.000100332	0.000270191
182	0.000487661	0.000238467	0.000272527	0.000223013	9.0926e-05	0.000262519
183	0.000496364	0.000240279	0.000275349	0.000222865	8.93583e-05	0.000264843
184	0.0004901	0.000233873	0.000268249	0.000214338	8.23037e-05	0.000257773
185	0.00047713	0.000221383	0.000255278	0.000202773	7.28976e-05	0.000245892
186	0.000477906	0.000220542	0.000255369	0.000201735	7.28976e-05	0.00024569
187	0.000457286	0.000203199	0.000233295	0.000183422	6.5843e-05	0.000228609
188	0.00042669	0.000179449	0.000207308	0.000164961	5.33014e-05	0.000206342
189	0.000362503	0.000145216	0.000168714	0.000137233	4.46791e-05	0.000171669
190	0.000369321	0.000149746	0.000176314	0.000140347	4.78145e-05	0.000176709
191	0.000365774	0.000148452	0.000175358	0.000137159	4.78145e-05	0.000174912
192	0.00036206	0.000146187	0.000172673	0.000135305	4.78145e-05	0.000172808
193	0.000216504	7.6879e-05	0.000102721	8.23694e-05	2.58669e-05	0.000100868
194	0.000506563	0.000323241	0.000336016	0.00032414	0.000453846	0.000388761
195	0.000511329	0.000328548	0.000339794	0.000327698	0.000457765	0.000393027
196	0.000513879	0.000331784	0.000341887	0.000328514	0.000459333	0.000395079
197	0.000516152	0.000333531	0.000343116	0.000328959	0.000460901	0.000396532
198	0.000516761	0.000334372	0.000343435	0.000329997	0.000461684	0.00039725
199	0.000509722	0.000329842	0.000339157	0.000325474	0.000461684	0.000393176
200	0.000505343	0.000336508	0.000337609	0.00033578	0.000460117	0.000395071
201	0.000497251	0.000357086	0.000338792	0.000366029	0.00046482	0.000404796
202	0.000663814	0.000590894	0.000469549	0.000593861	0.0005628	0.000576184
203	0.000707159	0.000626292	0.000508234	0.000634341	0.00057691	0.000610587
204	0.000705773	0.000627975	0.000509144	0.000633525	0.000577694	0.000610822
205	0.000707214	0.000629593	0.000510328	0.000634638	0.000577694	0.000611893
206	0.000706217	0.00063024	0.000510419	0.000636046	0.000577694	0.000612123
207	0.000656885	0.00061568	0.000489711	0.000624258	0.000575342	0.000592375
208	0.000833481	0.000995674	0.000678268	0.00100986	0.000753275	0.000854112
209	0.000856816	0.00104427	0.000713084	0.00106109	0.000764249	0.000887903
210	0.0008592	0.00105463	0.000720139	0.00107192	0.000767384	0.000894653
211	0.000866849	0.00106893	0.000731289	0.00108778	0.000774439	0.000905857
212	0.000896725	0.0011473	0.000767107	0.00116459	0.000822253	0.000959594
213	0.000826608	0.0011097	0.00070867	0.00110854	0.00060748	0.000872199
214	0.0011573	0.00173127	0.00109575	0.00163041	0.00110836	0.00134462
215	0.00116705	0.00175864	0.00111755	0.00164628	0.00111071	0.00136005
216	0.00116943	0.00176654	0.00112087	0.00164857	0.00111228	0.00136354
217	0.00116927	0.00176796	0.00112074	0.00164724	0.00111149	0.00136334
218	0.00115253	0.00174861	0.00110162	0.00162759	0.00104643	0.00133536
219	0.00113379	0.00174156	0.00109247	0.00161788	0.00102527	0.00132219
220	0.0012166	0.0019854	0.00120748	0.00188063	0.00168291	0.00159461
221	0.00121732	0.00199161	0.00121185	0.00188738	0.00170173	0.00160198
222	0.00122026	0.00200274	0.00121813	0.00189991	0.00173465	0.00161514
223	0.00122037	0.00200345	0.00121863	0.0019008	0.00173622	0.00161589
224	0.00119221	0.00198701	0.00120043	0.00187752	0.00170878	0.00159319
225	0.00119355	0.00198993	0.00120266	0.00188115	0.00171113	0.00159568
226	0.00119355	0.00199154	0.00120193	0.00187893	0.00171192	0.00159557
227	0.00119759	0.00199678	0.00120475	0.0018816	0.00171819	0.00159978
228	0.00117481	0.00195977	0.00117148	0.00183748	0.00170878	0.00157047
229	0.00119027	0.00201115	0.00119956	0.00189116	0.00185536	0.0016295
230	0.00118335	0.0020316	0.00120029	0.00191526	0.00189847	0.00164579
231	0.00120358	0.00210835	0.00123424	0.00198502	0.00206935	0.00172011
232	0.00117836	0.00210841	0.00121822	0.00198599	0.00209365	0.00171693
233	0.00114033	0.00209152	0.0011825	0.00197123	0.00212735	0.00170259
234	0.00117919	0.00214155	0.00122409	0.00199992	0.0021446	0.00173787
235	0.00117625	0.00213889	0.00122086	0.00199414	0.00214303	0.00173464
236	0.00108313	0.00203011	0.00111409	0.00189672	0.00209443	0.0016437
237	0.00110763	0.00206499	0.00114176	0.00192252	0.0021007	0.00166752
238	0.000988404	0.0019865	0.00105429	0.00184623	0.00206073	0.00158723
239	0.00108912	0.00214329	0.00118468	0.00199229	0.00222612	0.0017271
240	0.001092	0.00214685	0.00118973	0.0019937	0.0022269	0.00172984
241	0.00109211	0.00214601	0.00119101	0.0019894	0.0022222	0.00172814
242	0.00109294	0.00214782	0.00119296	0.00198895	0.00222142	0.00172882
243	0.00106689	0.00209761	0.00115983	0.00194669	0.00219398	0.001693
244	0.00102781	0.00204312	0.00111514	0.00189405	0.00213441	0.00164291
245	0.00101191	0.00203212	0.00110545	0.00187722	0.00210149	0.00162564
246	0.00102161	0.00204758	0.00111605	0.00188805	0.00210149	0.00163496
247	0.00102183	0.00204713	0.00111637	0.0018859	0.00209992	0.00163423
248	0.00101396	0.00202668	0.00110685	0.00186847	0.00208503	0.0016202
249	0.00100947	0.00201219	0.00109971	0.00185009	0.00207876	0.00161004
250	0.000992506	0.00196326	0.00107727	0.0018145	0.00205681	0.00158087
251	0.000991951	0.00195977	0.00107641	0.0018099	0.00205367	0.00157834
252	0.000954537	0.00188017	0.00103199	0.0017328	0.0020137	0.00152264
253	0.000889796	0.0017864	0.000972003	0.00165095	0.00196118	0.00145206
254	0.000890351	0.00177747	0.000968271	0.00163997	0.00195099	0.00144541
255	0.000849056	0.00163569	0.000913565	0.00145944	0.00179344	0.00133024
256	0.000848613	0.00163368	0.000913156	0.00145796	0.00179265	0.00132921
257	0.000825444	0.00154172	0.000874197	0.00136825	0.00169389	0.0012607
258	0.000558333	0.000853953	0.000549741	0.000791443	0.000855958	0.000721886
259	0.000553289	0.000813895	0.000529033	0.000715969	0.000811279	0.000684693
260	0.000414274	0.000524499	0.000364552	0.000459148	0.000406815	0.000433858
261	0.000436778	0.000563844	0.000387126	0.000491622	0.000398977	0.000455669
262	0.000269771	0.000332301	0.000231156	0.000254596	9.17098e-05	0.000235907
263	0.000340775	0.000499584	0.000321953	0.000368327	0.000360569	0.000378242
264	0.00032459	0.000479588	0.00029988	0.000346456	0.000345675	0.000359238
265	0.000344933	0.000524369	0.000326459	0.000377669	0.000361352	0.000386956
266	0.000345598	0.000525858	0.000326049	0.00037752	0.000360569	0.000387119
267	0.000291721	0.000486965	0.000282812	0.00034438	0.000344108	0.000349997
268	0.000377968	0.000679422	0.000393407	0.000578514	0.000447575	0.000495377
269	0.000383511	0.000690164	0.000404057	0.000594973	0.000450711	0.000504683
270	0.000374531	0.000676704	0.000399779	0.000590005	0.000440521	0.000496308
271	0.000376471	0.00068091	0.000403784	0.000593342	0.000442088	0.000499319
272	0.000375751	0.000680522	0.000403147	0.000592748	0.000442088	0.000498851
273	0.000376083	0.000681363	0.000402783	0.00059223	0.000442088	0.000498909
274	0.000361339	0.000668485	0.000389766	0.00058489	0.000438953	0.000488687
275	0.000376471	0.000729316	0.000416573	0.000645314	0.000450711	0.000523677
276	0.000377635	0.000738117	0.000421488	0.000654729	0.000451495	0.000528693
277	0.000376361	0.000736046	0.000420851	0.000653617	0.000451495	0.000527674
278	0.000376305	0.000736434	0.000421033	0.000653617	0.000451495	0.000527777
279	0.000376361	0.000736563	0.000421124	0.000653543	0.000451495	0.000527817
280	0.000376305	0.000736046	0.000421169	0.00065295	0.000451495	0.000527593
281	0.000374698	0.00073171	0.000418757	0.000649169	0.000451495	0.000525166
282	0.000374698	0.00073158	0.000418848	0.000648947	0.000451495	0.000525114
283	0.000371649	0.000726339	0.00041589	0.000643683	0.000446791	0.00052087
284	0.000360342	0.000706407	0.000404239	0.000630931	0.000446008	0.000509585
285	0.000364831	0.000710613	0.000410884	0.000630708	0.000449143	0.000513236
286	0.000364388	0.00071029	0.000410884	0.000630189	0.000449143	0.000512979
287	0.000348258	0.000679098	0.000391951	0.000610097	0.00044444	0.000494769
288	0.000324091	0.000645771	0.000370787	0.000587929	0.000435818	0.000472879
289	0.000338503	0.000687252	0.000389812	0.000608763	0.000440521	0.00049297
290	0.000335177	0.000678969	0.000384532	0.000599273	0.000442872	0.000488165
291	0.000304414	0.000611991	0.000343389	0.000538033	0.000409167	0.000441399
292	0.00044487	0.00102687	0.000516927	0.000895907	0.00106995	0.000790904
293	0.000452797	0.00104984	0.00052653	0.000916443	0.00108563	0.000806247
294	0.000453573	0.00105715	0.000525938	0.000919335	0.00109111	0.000809422
295	0.000400472	0.000947398	0.000450479	0.000803825	0.00101116	0.000722667
296	0.000612598	0.00143126	0.000725828	0.00118023	0.0016931	0.0011286
297	0.000610602	0.00142957	0.00072337	0.00116867	0.00169389	0.00112522
298	0.00063366	0.00148762	0.00076738	0.00120574	0.00170878	0.00116064
299	0.000627397	0.00147934	0.000761373	0.00119313	0.00170408	0.00115306
300	0.000618418	0.00150684	0.000770566	0.0012345	0.0017417	0.00117441
301	0.00085798	0.00250634	0.00129787	0.00236647	0.00316752	0.00203923
302	0.000944449	0.00291357	0.00152293	0.00282755	0.00383222	0.00240814
303	0.000967452	0.00304054	0.00159261	0.00296115	0.00402975	0.0025183
304	0.00097244	0.00307969	0.00161322	0.00300089	0.00406424	0.0025461
305	0.000976875	0.00310189	0.00162688	0.00303039	0.00407286	0.00256178
306	0.000965013	0.00307432	0.00161263	0.00302053	0.00407364	0.00254923
307	0.000990787	0.00325086	0.00167858	0.00321693	0.00425784	0.002679
308	0.00101418	0.00339115	0.00173497	0.00336736	0.00442324	0.00278618
309	0.00101845	0.00347315	0.0017595	0.00345633	0.0045024	0.00284197
310	0.00109449	0.00374138	0.00189039	0.00373161	0.00494214	0.00308
311	0.00110541	0.00378629	0.00191001	0.00377083	0.00497036	0.00310858
312	0.00110297	0.00379218	0.00191119	0.00377372	0.00497898	0.00311181
313	0.00109034	0.00378895	0.00190537	0.00377031	0.00498917	0.00310883
314	0.00113174	0.00391132	0.00196876	0.00388701	0.00518435	0.00321664
315	0.00113335	0.00391688	0.00197109	0.00389338	0.00518592	0.00322012
316	0.00113013	0.00391811	0.00196863	0.00389464	0.0051867	0.00321964
317	0.00113856	0.00396296	0.00198715	0.00393927	0.00524157	0.0032539
318	0.00113235	0.00395105	0.00197714	0.00392978	0.0052353	0.00324513
319	0.00113501	0.00395662	0.00198087	0.00393357	0.0052447	0.00325015
320	0.0011354	0.00395752	0.00198092	0.00393349	0.0052447	0.00325041
321	0.00113535	0.0039583	0.00198151	0.00393386	0.00524706	0.00325121
322	0.00113235	0.00395209	0.00197782	0.00392853	0.00524549	0.00324726
323	0.00103779	0.00373459	0.00184875	0.00372775	0.00488257	0.00304629
324	0.00105636	0.00381794	0.00188543	0.0038297	0.00498604	0.00311509
325	0.00105697	0.00382176	0.00188716	0.00383511	0.00498995	0.00311819
326	0.00104932	0.00379729	0.0018766	0.00382302	0.00496409	0.00310207
327	0.00104871	0.00379063	0.00187519	0.0038185	0.00496879	0.00310036
328	0.00104882	0.00379147	0.00187496	0.00381909	0.00496958	0.00310078
329	0.00104067	0.00374643	0.00185157	0.00377513	0.00491706	0.00306617
330	0.00104139	0.00375083	0.00185439	0.00378158	0.00491627	0.00306889
331	0.00101052	0.00364807	0.00180224	0.00368742	0.00476107	0.00298186
332	0.00101091	0.00364962	0.00180187	0.00368742	0.00475794	0.00298155
333	0.000948274	0.00338106	0.00165405	0.00341407	0.00417632	0.00271476
334	0.000948883	0.00338138	0.00165505	0.0034157	0.00417476	0.00271515
335	0.00094711	0.00336786	0.00165022	0.00340109	0.00417319	0.0027079
336	0.000945447	0.0033533	0.00164408	0.00338931	0.00417005	0.00270044
337	0.000892069	0.00314175	0.00152839	0.00319573	0.00409402	0.00257039
338	0.000890461	0.00312997	0.00152261	0.00317934	0.00409716	0.00256391
339	0.000890461	0.00312557	0.00152124	0.00317423	0.00409637	0.00256157
340	0.000887579	0.00309652	0.00150791	0.00311721	0.00408775	0.00253939
341	0.00086186	0.00297874	0.0014451	0.00296782	0.00405091	0.00246089
342	0.000859865	0.00295298	0.00143422	0.00294083	0.00404621	0.00244682
343	0.000792685	0.00268876	0.00129482	0.00265443	0.00386357	0.00225885
344	0.000777553	0.00259493	0.00125891	0.00255983	0.00372013	0.00218227
345	0.000776833	0.00259298	0.00125859	0.0025579	0.00372013	0.00218129
346	0.000720295	0.00237963	0.0011688	0.0023228	0.00329528	0.00197736
347	0.000719464	0.00237561	0.00116748	0.00231917	0.00329372	0.00197509
348	0.000711482	0.00229893	0.00113525	0.0022325	0.0032169	0.00191901
349	0.0005922	0.00173612	0.000871285	0.0017675	0.00192434	0.00137829
350	0.000590094	0.00172201	0.000866824	0.00175682	0.00190396	0.00136794
351	0.000521916	0.00148206	0.000731153	0.00150919	0.00152928	0.00115472
352	0.000431623	0.00120347	0.000591658	0.00123769	0.00125885	0.000944659
353	0.00042935	0.00118897	0.000586925	0.0012239	0.00124945	0.000935719
354	0.000418597	0.00113222	0.000562985	0.00116407	0.00120869	0.000897312
355	7.75447e-05	0.000177767	9.62582e-05	0.00020774	0.00019361	0.000150584
356	8.71339e-05	0.000193686	0.00010932	0.000231168	0.000195961	0.000163454
357	8.50276e-05	0.000174143	0.000102084	0.000210706	0.00018342	0.000151076
358	4.14052e-05	8.60683e-05	5.00634e-05	0.000106687	7.99522e-05	7.28352e-05
359	5.85327e-05	0.000102894	6.59471e-05	0.000124926	8.38714e-05	8.72342e-05
360	6.01955e-05	0.000106194	6.77676e-05	0.000127743	8.38714e-05	8.91543e-05
361	6.0251e-05	0.000106323	6.78131e-05	0.000127669	8.38714e-05	8.91855e-05
362	5.75904e-05	9.99169e-05	6.44907e-05	0.000119143	8.0736e-05	8.43754e-05
363	5.90315e-05	0.000104576	6.72214e-05	0.000124036	8.15198e-05	8.72769e-05
364	5.9087e-05	0.000104641	6.73125e-05	0.000124258	8.15198e-05	8.73637e-05
365	5.89761e-05	0.000104576	6.7358e-05	0.000124184	8.15198e-05	8.73228e-05
366	5.89761e-05	0.000104641	6.7267e-05	0.000124036	8.15198e-05	8.7288e-05
367	5.80338e-05	0.000102635	6.67208e-05	0.000121589	7.91683e-05	8.56294e-05
368	5.80338e-05	0.000102764	6.67663e-05	0.000121664	7.91683e-05	8.56793e-05
369	5.79784e-05	0.00010257	6.65388e-05	0.00012107	7.91683e-05	8.54651e-05
370	5.77567e-05	0.000102247	6.66753e-05	0.000120181	7.91683e-05	8.52057e-05
371	5.7923e-05	0.000102117	6.66298e-05	0.00011981	7.91683e-05	8.51296e-05
372	5.64818e-05	9.66165e-05	6.43542e-05	0.000110394	7.91683e-05	8.1403e-05
373	4.40658e-05	7.22197e-05	5.13377e-05	8.03677e-05	5.01661e-05	5.96314e-05
374	5.35995e-05	8.49035e-05	5.9894e-05	9.84578e-05	5.40853e-05	7.0188e-05
375	5.35995e-05	8.50329e-05	5.99395e-05	9.89026e-05	5.40853e-05	7.0312e-05
376	5.43755e-05	8.76214e-05	6.10318e-05	0.000102832	5.48691e-05	7.2146e-05
377	4.88881e-05	7.90146e-05	5.35223e-05	9.11921e-05	3.44892e-05	6.14213e-05
378	8.23116e-05	0.000128649	9.32999e-05	0.000156213	4.5463e-05	0.000101187
379	8.75219e-05	0.00013525	9.87159e-05	0.000164813	4.62468e-05	0.00010651
380	8.90184e-05	0.000136803	9.99902e-05	0.000168668	4.70307e-05	0.000108302
381	8.95173e-05	0.000134991	9.88979e-05	0.000167334	4.70307e-05	0.000107554
382	9.75544e-05	0.0001601	0.000112096	0.000190317	5.01661e-05	0.000122047
383	9.91064e-05	0.00016683	0.000115237	0.000195878	5.09499e-05	0.0001256
384	9.95499e-05	0.000168642	0.000116147	0.000197286	5.09499e-05	0.000126515
385	9.99933e-05	0.000169936	0.000116602	0.00019825	5.09499e-05	0.000127146
386	0.000100381	0.00017013	0.000116875	0.000198991	5.09499e-05	0.000127465
387	0.000100215	0.000169742	0.000116784	0.000198176	5.09499e-05	0.000127173
388	0.000100104	0.000169548	0.000116238	0.000197286	5.09499e-05	0.000126825
389	9.9827e-05	0.000168189	0.000115328	0.000194988	4.93822e-05	0.000125543
390	0.000100049	0.000167866	0.000115555	0.00019484	4.93822e-05	0.000125538
391	9.89402e-05	0.000165536	0.000114099	0.000192319	4.93822e-05	0.000124055
392	9.71664e-05	0.000157706	0.000110185	0.00018572	4.46791e-05	0.000119091
393	9.63904e-05	0.000154794	0.000108091	0.00018231	4.23276e-05	0.000116783
394	0.000101379	0.000166054	0.000115737	0.000191577	4.31115e-05	0.000123572
395	0.000103929	0.000172201	0.000121199	0.000196619	4.5463e-05	0.000127882
396	0.000104816	0.000173366	0.000121153	0.000196174	4.5463e-05	0.000128194
397	9.36744e-05	0.000151105	0.000103267	0.000165629	3.91922e-05	0.000110574
398	9.52819e-05	0.00015324	0.000105588	0.00016637	3.60569e-05	0.000111307
399	9.52264e-05	0.000153111	0.000105452	0.000165703	3.60569e-05	0.00011111
400	9.5171e-05	0.000152982	0.000105406	0.000165406	3.60569e-05	0.000111004
401	9.50602e-05	0.000152658	0.000105224	0.000165035	3.60569e-05	0.000110807
402	9.31202e-05	0.000145734	0.000101902	0.000155842	3.60569e-05	0.000106531
403	8.49167e-05	0.000133244	9.23897e-05	0.00014309	3.37053e-05	9.74691e-05
404	8.53601e-05	0.000133244	9.25717e-05	0.000143387	3.37053e-05	9.76536e-05
405	8.53047e-05	0.000133179	9.25717e-05	0.000143312	3.37053e-05	9.76145e-05
406	8.53047e-05	0.000133179	9.25262e-05	0.00014309	3.37053e-05	9.7561e-05
407	8.48059e-05	0.000132079	9.20256e-05	0.000142942	3.37053e-05	9.71116e-05
408	8.47504e-05	0.000132015	9.18435e-05	0.000142719	3.37053e-05	9.70066e-05
409	8.47504e-05	0.000131885	9.1798e-05	0.000142423	3.37053e-05	9.69123e-05
410	8.4695e-05	0.00013182	9.17525e-05	0.000142423	3.37053e-05	9.68792e-05
411	8.22561e-05	0.000128714	8.96589e-05	0.000138419	3.29215e-05	9.43939e-05
412	8.22561e-05	0.000128714	8.95679e-05	0.000138197	3.29215e-05	9.43313e-05
413	8.10921e-05	0.000125737	8.81115e-05	0.000131153	3.13538e-05	9.14895e-05
414	8.06487e-05	0.000125155	8.77474e-05	0.000129597	3.05699e-05	9.07436e-05
415	7.87641e-05	0.000120237	8.49712e-05	0.000122183	2.90023e-05	8.70315e-05
416	7.63253e-05	0.000116095	8.18308e-05	0.00011766	2.90023e-05	8.41827e-05
417	1.06423e-05	5.63003e-06	5.82556e-06	8.30367e-06	1.56769e-06	6.39385e-06
418	1.14737e-05	5.63003e-06	5.78004e-06	8.89679e-06	1.56769e-06	6.66965e-06
419	1.14183e-05	5.43589e-06	5.73453e-06	8.30367e-06	1.56769e-06	6.49202e-06
420	7.42744e-06	2.84737e-06	3.41341e-06	4.89323e-06	7.83845e-07	3.87306e-06
421	8.20344e-06	2.9768e-06	3.68648e-06	5.26393e-06	3.13538e-06	4.65321e-06
422	7.09487e-06	2.26496e-06	2.36663e-06	4.30011e-06	3.13538e-06	3.83239e-06
423	8.86859e-06	2.91209e-06	2.95829e-06	5.41221e-06	3.91922e-06	4.81408e-06
424	9.03487e-06	2.84737e-06	3.0038e-06	5.41221e-06	3.91922e-06	4.84349e-06
425	8.81316e-06	2.71795e-06	2.82175e-06	5.26393e-06	3.91922e-06	4.7072e-06
426	8.36973e-06	2.58852e-06	2.6397e-06	5.33807e-06	3.91922e-06	4.57105e-06
427	6.81773e-06	2.0061e-06	2.18458e-06	4.44839e-06	5.48691e-06	4.18874e-06
428	1.26932e-05	4.07692e-06	4.32365e-06	6.82087e-06	6.27076e-06	6.83708e-06
429	1.3192e-05	4.14163e-06	4.36917e-06	6.74673e-06	6.27076e-06	6.94406e-06
430	1.49103e-05	4.40048e-06	4.8698e-06	7.48813e-06	7.0546e-06	7.74466e-06
431	1.49657e-05	4.40048e-06	4.8698e-06	7.48813e-06	7.0546e-06	7.75574e-06
432	1.4356e-05	4.20635e-06	4.55121e-06	7.04329e-06	7.0546e-06	7.44229e-06
433	2.19497e-05	6.4713e-06	7.78258e-06	1.26038e-05	7.83845e-06	1.13292e-05
434	2.1728e-05	6.40659e-06	7.78258e-06	1.23814e-05	7.83845e-06	1.12274e-05
435	3.60841e-05	1.06129e-05	1.46549e-05	1.97212e-05	1.019e-05	1.82526e-05
436	3.64721e-05	1.10012e-05	1.4928e-05	1.97212e-05	1.019e-05	1.84625e-05
437	6.49624e-05	2.36202e-05	3.43617e-05	3.72924e-05	2.97861e-05	3.80046e-05
438	6.78447e-05	2.52381e-05	3.66373e-05	4.0258e-05	3.13538e-05	4.02664e-05
439	6.88978e-05	2.53028e-05	3.70924e-05	4.07769e-05	3.13538e-05	4.06847e-05
440	0.000122608	4.73052e-05	7.30015e-05	7.69572e-05	7.28976e-05	7.85539e-05
441	0.000126599	4.91819e-05	7.60508e-05	7.91814e-05	7.44652e-05	8.10957e-05
442	0.000136022	5.7271e-05	8.65641e-05	8.71885e-05	7.68168e-05	8.87725e-05
443	0.000137131	5.78534e-05	8.72468e-05	8.77075e-05	7.68168e-05	8.93511e-05
444	0.000137408	5.81123e-05	8.73378e-05	8.77816e-05	7.68168e-05	8.94913e-05
445	0.000137408	5.80476e-05	8.73378e-05	8.77816e-05	7.68168e-05	8.94784e-05
446	0.000150045	6.37423e-05	9.77601e-05	9.43801e-05	8.0736e-05	9.73327e-05
447	0.000150323	6.38717e-05	9.78966e-05	9.43801e-05	8.0736e-05	9.74415e-05
448	0.000150489	6.39364e-05	9.78966e-05	9.44542e-05	8.0736e-05	9.75024e-05
449	0.000150045	6.3807e-05	9.77601e-05	9.40835e-05	8.23037e-05	9.75999e-05
450	0.000167616	7.84322e-05	0.000120061	0.000113805	0.000102684	0.00011652
451	0.000167949	7.85616e-05	0.00012088	0.000114101	0.000102684	0.000116835
452	0.000168171	7.89499e-05	0.000121381	0.000114101	0.000102684	0.000117057
453	0.00016806	7.90146e-05	0.000122064	0.000113656	0.000103467	0.000117252
454	0.000168171	7.92734e-05	0.000122564	0.000113879	0.000103467	0.000117471
455	0.000168004	7.92734e-05	0.000122337	0.000113656	0.000103467	0.000117347
456	0.000163515	7.51318e-05	0.000117194	0.000107429	0.000102684	0.000113191
457	0.000145279	6.6525e-05	0.000105816	9.51956e-05	9.0926e-05	0.000100748
458	0.00016418	7.09902e-05	0.000122928	9.86802e-05	9.48452e-05	0.000110325
459	0.000164291	7.09255e-05	0.000122883	9.84578e-05	9.48452e-05	0.000110281
460	0.000164235	7.05372e-05	0.00012261	9.79388e-05	9.40614e-05	0.000109876
461	0.000163681	7.00195e-05	0.000121699	9.66043e-05	9.32775e-05	0.000109056
462	0.000136687	5.23528e-05	0.0001004	7.42882e-05	6.81945e-05	8.63845e-05
463	0.000144946	5.58473e-05	0.000110139	7.70314e-05	6.89783e-05	9.13884e-05
464	0.000145667	5.59767e-05	0.000110458	7.70314e-05	6.89783e-05	9.16223e-05
465	0.000144447	5.50061e-05	0.000108956	7.48072e-05	6.81945e-05	9.02822e-05
466	0.000139015	5.18351e-05	0.000103677	6.84311e-05	6.34914e-05	8.52899e-05
467	0.000134137	4.91819e-05	0.000101356	6.25741e-05	5.72207e-05	8.08939e-05
468	0.000134248	4.96349e-05	0.000102129	6.24999e-05	5.72207e-05	8.11465e-05
469	0.000102709	3.56569e-05	7.96918e-05	3.84045e-05	3.60569e-05	5.85038e-05
470	0.000108252	3.83101e-05	8.34238e-05	4.15183e-05	3.60569e-05	6.15122e-05
471	0.000108474	3.83748e-05	8.34693e-05	4.12959e-05	3.60569e-05	6.15342e-05
472	0.000105259	3.64334e-05	8.042e-05	3.94424e-05	3.21376e-05	5.87385e-05
473	7.37201e-05	2.27143e-05	5.4387e-05	1.99436e-05	1.019e-05	3.6191e-05
474	8.54156e-05	3.4492e-05	6.84958e-05	3.09905e-05	1.41092e-05	4.67006e-05
475	8.5859e-05	3.46215e-05	6.89054e-05	3.1287e-05	1.41092e-05	4.69564e-05
476	8.36418e-05	3.42979e-05	6.71304e-05	3.10646e-05	1.41092e-05	4.60488e-05
477	8.25887e-05	3.39096e-05	6.5674e-05	3.06939e-05	1.41092e-05	4.53951e-05
478	8.39744e-05	3.39743e-05	6.60381e-05	3.06939e-05	1.33254e-05	4.56012e-05
479	8.32538e-05	3.37802e-05	6.60836e-05	3.06939e-05	1.33254e-05	4.54274e-05
480	8.34201e-05	3.37802e-05	6.61747e-05	3.07681e-05	1.25415e-05	4.53369e-05
481	8.31984e-05	3.37802e-05	6.5674e-05	3.06939e-05	1.25415e-05	4.51776e-05
482	7.93184e-05	3.23565e-05	6.26247e-05	2.99525e-05	1.25415e-05	4.33587e-05
483	7.71013e-05	3.20329e-05	6.15324e-05	2.92853e-05	1.25415e-05	4.24987e-05
484	7.50504e-05	3.15152e-05	5.92113e-05	2.89887e-05	1.25415e-05	4.14614e-05
485	7.14475e-05	2.91856e-05	5.57979e-05	2.77283e-05	1.25415e-05	3.93402e-05
486	6.74013e-05	2.63382e-05	4.91531e-05	2.60231e-05	1.09738e-05	3.59779e-05
487	4.73361e-05	2.03199e-05	3.39976e-05	2.26868e-05	7.83845e-06	2.64358e-05
488	5.80338e-05	2.28437e-05	3.87764e-05	2.76542e-05	1.72446e-05	3.29105e-05
489	5.77012e-05	2.28437e-05	3.83667e-05	2.74318e-05	1.64607e-05	3.25608e-05
490	5.84772e-05	2.29731e-05	3.86853e-05	2.81732e-05	1.64607e-05	3.29539e-05
491	5.82001e-05	2.29731e-05	3.83667e-05	2.8099e-05	1.64607e-05	3.28199e-05
492	5.81447e-05	2.29084e-05	3.82757e-05	2.80249e-05	1.64607e-05	3.27629e-05
493	3.69155e-05	8.08913e-06	1.81138e-05	1.58659e-05	1.09738e-05	1.79916e-05
494	3.96869e-05	8.28326e-06	1.86145e-05	1.62366e-05	1.17577e-05	1.89158e-05
495	3.94098e-05	8.15384e-06	1.84324e-05	1.57918e-05	1.17577e-05	1.87091e-05
496	3.65275e-05	7.70085e-06	1.71581e-05	1.46797e-05	1.17577e-05	1.75648e-05
497	5.12715e-05	1.12601e-05	2.32567e-05	2.00919e-05	2.038e-05	2.5252e-05
498	5.14932e-05	1.13248e-05	2.33932e-05	2.04626e-05	2.038e-05	2.54108e-05
499	5.19921e-05	1.15836e-05	2.37573e-05	2.07592e-05	2.11638e-05	2.58512e-05
500	5.19921e-05	1.15836e-05	2.38029e-05	2.07592e-05	2.11638e-05	2.58603e-05
501	5.19921e-05	1.15836e-05	2.38484e-05	2.07592e-05	2.11638e-05	2.58694e-05
502	5.19921e-05	1.15836e-05	2.38029e-05	2.07592e-05	2.11638e-05	2.58603e-05
503	5.14378e-05	1.11306e-05	2.32112e-05	2.04626e-05	2.11638e-05	2.54812e-05
504	5.04955e-05	1.03541e-05	2.16183e-05	2.00919e-05	2.11638e-05	2.47447e-05
505	4.99967e-05	1.01599e-05	2.12997e-05	1.97954e-05	2.11638e-05	2.44831e-05
506	4.19595e-05	8.73626e-06	1.72036e-05	1.60884e-05	2.038e-05	2.08736e-05
507	4.38995e-05	8.86568e-06	1.77042e-05	1.61625e-05	2.038e-05	2.14024e-05
508	4.39549e-05	8.86568e-06	1.74767e-05	1.61625e-05	2.038e-05	2.1368e-05
509	4.38441e-05	8.67154e-06	1.73401e-05	1.59401e-05	2.038e-05	2.12352e-05
510	3.18715e-05	5.11233e-06	1.07864e-05	8.30367e-06	1.4893e-05	1.41934e-05
511	3.50863e-05	5.56532e-06	1.23338e-05	8.97093e-06	1.4893e-05	1.53699e-05
512	3.49755e-05	5.56532e-06	1.24703e-05	8.97093e-06	1.4893e-05	1.5375e-05
513	3.51418e-05	5.69474e-06	1.25158e-05	9.04507e-06	1.25415e-05	1.49878e-05
514	3.03195e-05	5.43589e-06	1.14691e-05	8.45195e-06	1.25415e-05	1.36436e-05
515	3.69709e-05	6.08302e-06	1.45184e-05	9.19335e-06	1.25415e-05	1.58614e-05
516	3.66383e-05	5.88888e-06	1.42453e-05	9.11921e-06	1.25415e-05	1.56866e-05
517	3.64721e-05	5.75946e-06	1.42908e-05	9.11921e-06	1.25415e-05	1.56366e-05
518	3.71372e-05	5.75946e-06	1.44274e-05	9.11921e-06	1.25415e-05	1.5797e-05
519	3.71926e-05	5.75946e-06	1.44729e-05	9.26749e-06	1.25415e-05	1.58468e-05
520	3.71372e-05	5.75946e-06	1.44729e-05	9.19335e-06	1.25415e-05	1.58209e-05
521	3.68046e-05	5.75946e-06	1.44274e-05	9.04507e-06	1.25415e-05	1.57156e-05
522	3.12063e-05	4.52991e-06	1.20152e-05	6.67259e-06	8.62229e-06	1.26093e-05
523	3.23149e-05	4.65934e-06	1.26524e-05	7.11743e-06	1.019e-05	1.33868e-05
524	3.23149e-05	4.65934e-06	1.26979e-05	7.11743e-06	1.019e-05	1.33959e-05
525	3.13172e-05	4.40048e-06	1.22883e-05	6.89501e-06	9.40614e-06	1.28614e-05
526	2.31138e-05	2.52381e-06	9.23897e-06	3.70699e-06	4.70307e-06	8.65733e-06
527	2.4444e-05	2.45909e-06	9.51204e-06	3.78113e-06	5.48691e-06	9.13663e-06
528	1.90675e-05	1.61783e-06	7.5095e-06	2.89146e-06	3.13538e-06	6.84433e-06
529	2.38343e-05	2.20024e-06	9.01141e-06	3.63286e-06	3.13538e-06	8.36284e-06
530	2.42223e-05	2.20024e-06	9.19345e-06	3.63286e-06	3.13538e-06	8.47685e-06
531	2.38343e-05	2.07082e-06	8.78384e-06	3.41044e-06	3.13538e-06	8.24696e-06
532	2.37235e-05	2.26496e-06	9.05692e-06	3.78113e-06	3.13538e-06	8.39238e-06
533	2.98206e-05	2.91209e-06	1.12415e-05	5.04151e-06	7.0546e-06	1.12141e-05
534	2.98206e-05	2.71795e-06	1.08774e-05	4.96737e-06	7.0546e-06	1.10876e-05
535	2.9488e-05	2.71795e-06	1.09684e-05	4.96737e-06	7.83845e-06	1.1196e-05
536	2.95435e-05	2.71795e-06	1.07409e-05	4.81909e-06	8.62229e-06	1.12887e-05
537	3.07075e-05	3.04151e-06	1.13325e-05	5.48635e-06	8.62229e-06	1.1838e-05
538	3.05412e-05	3.23565e-06	1.14235e-05	5.63463e-06	9.40614e-06	1.20482e-05
539	2.93772e-05	3.17094e-06	1.02402e-05	5.48635e-06	9.40614e-06	1.15362e-05
540	2.69383e-05	2.78266e-06	9.42101e-06	5.11565e-06	9.40614e-06	1.07328e-05
541	3.88001e-05	5.37118e-06	1.62478e-05	1.00089e-05	1.41092e-05	1.69074e-05
542	3.89109e-05	5.43589e-06	1.62023e-05	1.0083e-05	1.41092e-05	1.69483e-05
543	3.92435e-05	5.50061e-06	1.62933e-05	1.02313e-05	1.41092e-05	1.70756e-05
544	3.74143e-05	5.56532e-06	1.55196e-05	9.71233e-06	1.33254e-05	1.63074e-05
545	5.45418e-05	1.55958e-05	3.31328e-05	3.00267e-05	3.91922e-05	3.44979e-05
546	5.49298e-05	1.59194e-05	3.3588e-05	3.01749e-05	3.91922e-05	3.47609e-05
547	5.49298e-05	1.59194e-05	3.3861e-05	3.01749e-05	3.91922e-05	3.48155e-05
548	5.49298e-05	1.59194e-05	3.39521e-05	3.01749e-05	3.91922e-05	3.48337e-05
549	5.40984e-05	1.59194e-05	3.32239e-05	2.99525e-05	3.91922e-05	3.44773e-05
550	5.14932e-05	1.55958e-05	3.24047e-05	2.97301e-05	3.91922e-05	3.36832e-05
551	5.25464e-05	1.57253e-05	3.32694e-05	2.98784e-05	3.91922e-05	3.41223e-05
552	5.24909e-05	1.57253e-05	3.32694e-05	2.98784e-05	3.91922e-05	3.41112e-05
553	5.20475e-05	1.57253e-05	3.31328e-05	2.97301e-05	3.91922e-05	3.39656e-05
554	5.19921e-05	1.57253e-05	3.31328e-05	2.97301e-05	3.91922e-05	3.39545e-05
555	5.18258e-05	1.56605e-05	3.31328e-05	2.97301e-05	3.91922e-05	3.39083e-05
556	5.17704e-05	1.56605e-05	3.30418e-05	2.9656e-05	3.91922e-05	3.38642e-05
557	5.17149e-05	1.56605e-05	3.29963e-05	2.9656e-05	3.91922e-05	3.3844e-05
558	4.83892e-05	1.52723e-05	3.20861e-05	2.89887e-05	3.91922e-05	3.27857e-05
559	4.71144e-05	1.52076e-05	3.15399e-05	2.83956e-05	3.91922e-05	3.22899e-05
560	3.80795e-05	1.3525e-05	2.84906e-05	2.57265e-05	3.60569e-05	2.83757e-05
561	3.81903e-05	1.35897e-05	2.84906e-05	2.57265e-05	3.60569e-05	2.84108e-05
562	3.81349e-05	1.35897e-05	2.84451e-05	2.55783e-05	3.60569e-05	2.8361e-05
563	3.81349e-05	1.35897e-05	2.83996e-05	2.55783e-05	3.60569e-05	2.83519e-05
564	3.50863e-05	1.21013e-05	2.46221e-05	2.35765e-05	3.29215e-05	2.56615e-05
565	1.69612e-05	5.04761e-06	1.24248e-05	1.10468e-05	1.019e-05	1.11341e-05
566	1.70166e-05	5.04761e-06	1.24248e-05	1.09727e-05	9.40614e-06	1.09736e-05
567	1.552e-05	4.14163e-06	1.04223e-05	8.00711e-06	9.40614e-06	9.49944e-06
568	4.15715e-06	7.76556e-07	2.68522e-06	1.63108e-06	3.13538e-06	2.47708e-06
569	4.32344e-06	8.41269e-07	2.45766e-06	1.63108e-06	2.35153e-06	2.321e-06
570	2.10629e-06	3.88278e-07	5.91658e-07	3.70699e-07	1.56769e-06	1.00492e-06
571	3.21486e-06	6.4713e-07	8.19219e-07	5.93119e-07	7.83845e-07	1.21163e-06
572	3.21486e-06	4.52991e-07	7.28194e-07	5.93119e-07	7.83845e-07	1.1546e-06
573	1.01989e-05	1.16483e-06	3.14034e-06	1.1121e-06	7.83845e-07	3.28e-06
574	1.09749e-05	1.22955e-06	3.32239e-06	1.1121e-06	7.83845e-07	3.48456e-06
575	1.06977e-05	1.16483e-06	3.23136e-06	1.1121e-06	7.83845e-07	3.39797e-06
576	1.40235e-05	1.4884e-06	4.00507e-06	1.4828e-06	7.83845e-07	4.35672e-06
577	1.41343e-05	1.4884e-06	3.91404e-06	1.40866e-06	7.83845e-07	4.34585e-06
578	2.23378e-05	2.78266e-06	6.41721e-06	2.5949e-06	0	6.82651e-06
579	2.31692e-05	2.84737e-06	6.64477e-06	2.66904e-06	0	7.06608e-06
580	2.35018e-05	2.91209e-06	6.78131e-06	2.74318e-06	0	7.18768e-06
581	5.25464e-05	6.92429e-06	1.99343e-05	9.48991e-06	2.35153e-06	1.82493e-05
582	5.27681e-05	6.92429e-06	1.99343e-05	9.48991e-06	2.35153e-06	1.82936e-05
583	5.29344e-05	6.92429e-06	1.98888e-05	9.56405e-06	2.35153e-06	1.83326e-05
584	7.79881e-05	9.70695e-06	2.99015e-05	1.40866e-05	4.70307e-06	2.72772e-05
585	7.82098e-05	9.70695e-06	3.00835e-05	1.40866e-05	4.70307e-06	2.7358e-05
586	7.82653e-05	9.70695e-06	3.01746e-05	1.41607e-05	4.70307e-06	2.74021e-05
587	8.00944e-05	9.83638e-06	3.04476e-05	1.45314e-05	4.70307e-06	2.79226e-05
588	8.14801e-05	9.90109e-06	3.06752e-05	1.45314e-05	4.70307e-06	2.82582e-05
589	8.18681e-05	9.9658e-06	3.07207e-05	1.47538e-05	4.70307e-06	2.84023e-05
590	8.26441e-05	1.00305e-05	3.09027e-05	1.4828e-05	4.70307e-06	2.86217e-05
591	8.25333e-05	9.9658e-06	3.10393e-05	1.47538e-05	4.70307e-06	2.85991e-05
592	0.000132197	2.04493e-05	5.55248e-05	3.78855e-05	1.09738e-05	5.14061e-05
593	0.00013835	2.0967e-05	5.89382e-05	4.07769e-05	1.25415e-05	5.43147e-05
594	0.000147828	2.39438e-05	6.45817e-05	4.78944e-05	1.41092e-05	5.96714e-05
595	0.000163903	3.21624e-05	7.96007e-05	5.81998e-05	1.64607e-05	7.00653e-05
596	0.000166231	3.33919e-05	8.28776e-05	5.99792e-05	1.64607e-05	7.17881e-05
597	0.000177815	3.90867e-05	9.5439e-05	6.43534e-05	1.64607e-05	7.8631e-05
598	0.000176651	3.91514e-05	9.43467e-05	6.42793e-05	1.64607e-05	7.81778e-05
599	0.000179367	3.95396e-05	9.56665e-05	6.465e-05	1.64607e-05	7.91368e-05
600	0.000165898	3.63687e-05	8.79295e-05	6.06464e-05	1.64607e-05	7.34607e-05
601	0.000170609	3.65628e-05	8.93859e-05	6.08689e-05	1.64607e-05	7.47775e-05
602	0.000170111	3.63687e-05	8.92038e-05	6.0424e-05	1.64607e-05	7.45136e-05
603	0.000165067	3.59804e-05	8.77474e-05	5.95343e-05	1.4893e-05	7.26444e-05
604	0.00018236	4.14163e-05	9.78511e-05	6.53914e-05	2.19477e-05	8.17933e-05
605	0.000182637	4.14163e-05	9.82152e-05	6.54655e-05	2.27315e-05	8.20931e-05
606	0.00018236	4.1481e-05	9.79877e-05	6.52431e-05	2.27315e-05	8.19607e-05
607	0.000181972	4.1481e-05	9.78966e-05	6.53173e-05	2.27315e-05	8.18797e-05
608	0.000180753	4.13516e-05	9.7578e-05	6.50207e-05	2.27315e-05	8.1487e-05
609	0.000180476	4.13516e-05	9.74415e-05	6.48724e-05	2.27315e-05	8.13746e-05
610	0.000159302	3.94102e-05	9.07057e-05	6.19068e-05	2.5083e-05	7.52815e-05
611	0.000168725	4.29694e-05	9.64858e-05	6.68742e-05	2.58669e-05	8.01843e-05
612	0.000168891	4.30989e-05	9.64858e-05	6.68742e-05	2.58669e-05	8.02434e-05
613	0.000169501	4.31636e-05	9.67133e-05	6.66518e-05	2.58669e-05	8.03793e-05
614	0.000167505	4.3293e-05	9.62582e-05	6.70225e-05	2.27315e-05	7.9362e-05
615	0.000167616	4.36813e-05	9.63492e-05	6.71707e-05	2.19477e-05	7.9353e-05
616	0.000127874	3.22918e-05	7.00887e-05	4.27046e-05	1.64607e-05	5.7884e-05
617	0.000144503	3.91514e-05	8.0602e-05	5.37514e-05	1.80284e-05	6.72072e-05
618	0.000145001	3.92808e-05	8.15123e-05	5.41963e-05	1.80284e-05	6.76038e-05
619	0.000143172	3.90219e-05	8.02834e-05	5.301e-05	1.72446e-05	6.65464e-05
620	0.000143172	3.88925e-05	8.03289e-05	5.301e-05	1.88123e-05	6.68431e-05
621	0.000140456	3.77277e-05	7.82809e-05	5.16014e-05	1.88123e-05	6.53757e-05
622	0.000139791	3.75335e-05	7.72796e-05	5.0341e-05	1.88123e-05	6.47515e-05
623	8.49721e-05	2.3232e-05	4.07334e-05	3.05456e-05	1.17577e-05	3.82482e-05
624	9.05704e-05	2.40732e-05	4.32821e-05	3.11388e-05	1.33254e-05	4.0478e-05
625	8.8575e-05	2.37497e-05	4.28269e-05	3.07681e-05	1.33254e-05	3.9849e-05
626	7.87087e-05	2.29084e-05	4.06423e-05	2.99525e-05	1.33254e-05	3.71075e-05
627	0.000102765	3.38449e-05	5.80735e-05	3.98131e-05	1.88123e-05	5.06618e-05
628	0.000103042	3.41038e-05	5.83011e-05	3.99614e-05	1.88123e-05	5.08441e-05
629	0.000103042	3.41038e-05	5.83466e-05	3.99614e-05	1.88123e-05	5.08532e-05
630	0.000103153	3.39743e-05	5.83011e-05	3.9739e-05	1.88123e-05	5.07959e-05
631	0.000101102	3.3586e-05	5.67537e-05	3.72182e-05	1.88123e-05	4.94944e-05
632	0.000101102	3.3586e-05	5.67537e-05	3.70699e-05	1.88123e-05	4.94648e-05
633	0.00010088	3.34566e-05	5.66171e-05	3.69217e-05	1.88123e-05	4.93375e-05
634	9.31202e-05	3.03504e-05	5.15198e-05	3.32888e-05	1.88123e-05	4.54183e-05
635	9.2843e-05	3.00268e-05	5.12922e-05	3.31405e-05	1.88123e-05	4.5223e-05
636	8.99053e-05	2.85384e-05	4.93807e-05	3.1287e-05	1.80284e-05	4.3428e-05
637	6.98401e-05	2.13553e-05	3.90949e-05	2.50593e-05	1.80284e-05	3.46756e-05
638	8.52493e-05	3.37155e-05	5.34313e-05	3.46233e-05	2.74346e-05	4.68908e-05
639	8.60253e-05	3.39743e-05	5.41595e-05	3.47716e-05	2.74346e-05	4.72731e-05
640	8.8187e-05	3.52686e-05	5.59344e-05	3.68475e-05	2.97861e-05	4.92047e-05
641	8.0039e-05	3.30683e-05	5.12467e-05	3.42526e-05	2.82184e-05	4.5365e-05
642	8.2755e-05	3.88278e-05	5.68447e-05	3.75889e-05	2.35153e-05	4.79063e-05
643	8.41407e-05	3.92161e-05	5.78004e-05	3.78855e-05	2.35153e-05	4.85116e-05
644	8.3919e-05	3.92161e-05	5.76184e-05	3.78113e-05	2.35153e-05	4.8416e-05
645	8.3919e-05	3.90219e-05	5.74818e-05	3.75889e-05	2.35153e-05	4.83054e-05
646	7.0339e-05	3.28742e-05	4.62859e-05	3.15095e-05	1.80284e-05	3.98074e-05
647	7.35538e-05	3.37155e-05	4.75602e-05	3.21026e-05	1.80284e-05	4.09921e-05
648	7.36093e-05	3.37155e-05	4.76057e-05	3.20284e-05	1.80284e-05	4.09975e-05
649	7.37755e-05	3.36508e-05	4.76512e-05	3.19543e-05	1.88123e-05	4.11688e-05
650	7.37201e-05	3.36508e-05	4.76057e-05	3.19543e-05	1.88123e-05	4.11486e-05
651	7.36647e-05	3.36508e-05	4.75602e-05	3.19543e-05	1.88123e-05	4.11285e-05
652	7.2667e-05	3.32625e-05	4.71506e-05	3.15095e-05	1.88123e-05	4.06804e-05
653	7.2667e-05	3.32625e-05	4.71506e-05	3.15095e-05	1.88123e-05	4.06804e-05
654	7.17801e-05	3.29389e-05	4.6741e-05	3.06939e-05	1.88123e-05	4.01932e-05
655	7.17801e-05	3.28742e-05	4.66955e-05	3.06198e-05	1.88123e-05	4.01564e-05
656	7.12258e-05	3.26154e-05	4.59673e-05	3.03232e-05	1.80284e-05	3.9632e-05
657	4.81675e-05	2.12259e-05	2.82175e-05	2.00178e-05	1.41092e-05	2.63476e-05
658	4.97195e-05	2.14847e-05	2.86271e-05	1.99436e-05	1.41092e-05	2.67768e-05
659	4.96641e-05	2.12259e-05	2.83541e-05	1.97212e-05	1.33254e-05	2.64581e-05
660	4.91098e-05	2.07082e-05	2.77624e-05	1.89057e-05	1.33254e-05	2.59623e-05
661	4.72806e-05	2.0061e-05	2.6215e-05	1.76453e-05	1.33254e-05	2.49055e-05
662	1.40789e-05	3.04151e-06	5.05185e-06	3.26216e-06	4.70307e-06	6.0275e-06
663	2.11737e-05	5.82417e-06	9.32999e-06	6.00533e-06	4.70307e-06	9.40725e-06
664	2.35572e-05	6.40659e-06	1.09684e-05	7.48813e-06	4.70307e-06	1.06247e-05
665	2.4832e-05	6.73015e-06	1.16511e-05	7.56227e-06	5.48691e-06	1.12525e-05
666	2.51092e-05	6.73015e-06	1.18332e-05	7.56227e-06	5.48691e-06	1.13443e-05
667	2.51092e-05	6.73015e-06	1.18332e-05	7.56227e-06	5.48691e-06	1.13443e-05
668	2.33355e-05	6.34187e-06	1.14235e-05	6.89501e-06	4.70307e-06	1.05398e-05
669	2.6772e-05	7.57142e-06	1.23793e-05	7.48813e-06	4.70307e-06	1.17828e-05
670	2.69938e-05	7.57142e-06	1.25158e-05	7.56227e-06	4.70307e-06	1.18693e-05
671	2.70492e-05	7.57142e-06	1.25158e-05	7.56227e-06	4.70307e-06	1.18804e-05
672	2.72155e-05	7.57142e-06	1.26069e-05	7.63641e-06	4.70307e-06	1.19467e-05
673	2.73818e-05	7.57142e-06	1.26069e-05	7.63641e-06	4.70307e-06	1.19799e-05
674	2.73818e-05	7.57142e-06	1.26524e-05	7.63641e-06	4.70307e-06	1.1989e-05
675	2.72155e-05	7.50671e-06	1.26069e-05	7.63641e-06	4.70307e-06	1.19337e-05
676	2.71046e-05	7.57142e-06	1.26069e-05	7.48813e-06	4.70307e-06	1.18948e-05
677	2.71046e-05	7.57142e-06	1.26069e-05	7.41399e-06	4.70307e-06	1.188e-05
678	2.69938e-05	7.442e-06	1.24703e-05	7.33985e-06	4.70307e-06	1.17898e-05
679	2.32246e-05	6.73015e-06	1.06498e-05	6.52431e-06	7.83845e-07	9.58254e-06
680	2.35018e-05	6.79487e-06	1.06954e-05	6.52431e-06	7.83845e-07	9.66005e-06
681	2.1728e-05	6.53601e-06	1.02402e-05	6.45017e-06	7.83845e-07	9.14765e-06
682	2.25595e-05	6.66544e-06	1.05588e-05	6.45017e-06	7.83845e-07	9.40355e-06
683	2.2504e-05	6.60073e-06	1.03768e-05	6.37603e-06	7.83845e-07	9.32828e-06
684	1.81806e-05	5.24175e-06	7.32746e-06	4.07769e-06	7.83845e-07	7.12227e-06
685	2.10075e-05	5.43589e-06	8.10116e-06	4.22597e-06	7.83845e-07	7.91087e-06
686	2.10075e-05	5.43589e-06	8.14667e-06	4.22597e-06	7.83845e-07	7.91998e-06
687	2.07857e-05	5.37118e-06	8.05565e-06	4.15183e-06	7.83845e-07	7.82964e-06
688	1.6684e-05	3.10622e-06	5.78004e-06	1.8535e-06	7.83845e-07	5.64152e-06
689	1.8236e-05	3.36508e-06	6.28068e-06	1.92764e-06	7.83845e-07	6.11865e-06
690	1.8236e-05	3.36508e-06	6.28068e-06	1.92764e-06	7.83845e-07	6.11865e-06
691	1.60189e-05	2.78266e-06	5.14287e-06	1.40866e-06	7.83845e-07	5.22739e-06
692	1.74046e-05	3.10622e-06	5.64351e-06	1.4828e-06	7.83845e-07	5.6842e-06
693	1.74046e-05	3.10622e-06	5.64351e-06	1.4828e-06	7.83845e-07	5.6842e-06
694	1.71275e-05	2.91209e-06	5.50697e-06	1.33452e-06	7.83845e-07	5.53299e-06
695	1.67395e-05	2.71795e-06	5.32492e-06	1.33452e-06	7.83845e-07	5.38015e-06
696	1.69612e-05	2.71795e-06	5.41595e-06	1.33452e-06	7.83845e-07	5.44269e-06
697	1.68503e-05	2.65323e-06	5.37043e-06	1.33452e-06	7.83845e-07	5.39847e-06
698	1.29703e-05	1.81196e-06	3.50444e-06	1.03796e-06	7.83845e-07	4.0217e-06
699	1.47995e-05	1.87668e-06	4.05058e-06	1.1121e-06	0	4.36777e-06
700	1.44669e-05	1.68254e-06	3.91404e-06	1.1121e-06	0	4.23512e-06
701	1.9012e-05	2.65323e-06	6.14414e-06	2.00178e-06	0	5.96223e-06
702	1.90675e-05	2.65323e-06	6.14414e-06	2.00178e-06	0	5.97333e-06
703	1.90675e-05	2.65323e-06	6.14414e-06	2.00178e-06	0	5.97333e-06
704	1.90675e-05	2.65323e-06	6.14414e-06	2.00178e-06	0	5.97333e-06
705	1.89566e-05	2.65323e-06	6.14414e-06	2.00178e-06	0	5.95115e-06
706	1.89012e-05	2.65323e-06	6.09863e-06	2.00178e-06	0	5.93097e-06
707	1.552e-05	2.07082e-06	4.68775e-06	1.40866e-06	0	4.73745e-06
708	2.03977e-05	2.52381e-06	6.14414e-06	2.37248e-06	2.35153e-06	6.75793e-06
709	2.06195e-05	2.52381e-06	6.09863e-06	2.37248e-06	2.35153e-06	6.79319e-06
710	1.91783e-05	2.52381e-06	5.68902e-06	2.2242e-06	2.35153e-06	6.39337e-06
711	2.65503e-05	3.55922e-06	8.41975e-06	3.48458e-06	3.91922e-06	9.18661e-06
712	2.65503e-05	3.55922e-06	8.41975e-06	3.48458e-06	3.91922e-06	9.18661e-06
713	2.64949e-05	3.55922e-06	8.37424e-06	3.48458e-06	3.91922e-06	9.16643e-06
714	2.62732e-05	3.55922e-06	8.37424e-06	3.3363e-06	3.91922e-06	9.09244e-06
715	2.93218e-05	3.94749e-06	9.64858e-06	3.92941e-06	3.91922e-06	1.01533e-05
716	2.93772e-05	3.94749e-06	9.64858e-06	3.92941e-06	3.91922e-06	1.01644e-05
717	2.91555e-05	4.01221e-06	9.51204e-06	3.92941e-06	3.91922e-06	1.01057e-05
718	2.92109e-05	3.94749e-06	9.7396e-06	4.00355e-06	3.91922e-06	1.01642e-05
719	2.76035e-05	3.81807e-06	9.46653e-06	4.00355e-06	3.91922e-06	9.76217e-06
720	3.65275e-05	6.60073e-06	1.39722e-05	6.00533e-06	5.48691e-06	1.37185e-05
721	3.67492e-05	6.60073e-06	1.40177e-05	6.00533e-06	6.27076e-06	1.39287e-05
722	3.74698e-05	6.66544e-06	1.41998e-05	6.07947e-06	6.27076e-06	1.41371e-05
723	3.74698e-05	6.66544e-06	1.41998e-05	6.07947e-06	6.27076e-06	1.41371e-05
724	3.66938e-05	6.4713e-06	1.37902e-05	6.00533e-06	6.27076e-06	1.38463e-05
725	3.64166e-05	6.40659e-06	1.36081e-05	6.00533e-06	6.27076e-06	1.37415e-05
726	3.41995e-05	6.27716e-06	1.26524e-05	5.78291e-06	6.27076e-06	1.30365e-05
727	3.40332e-05	6.27716e-06	1.26524e-05	5.78291e-06	6.27076e-06	1.30033e-05
728	3.32018e-05	6.27716e-06	1.22428e-05	5.41221e-06	6.27076e-06	1.26809e-05
729	3.20378e-05	6.21245e-06	1.17876e-05	5.26393e-06	5.48691e-06	1.21577e-05
730	2.49429e-05	4.91819e-06	9.87614e-06	4.00355e-06	3.91922e-06	9.532e-06
731	2.47212e-05	4.91819e-06	9.87614e-06	4.00355e-06	3.91922e-06	9.48766e-06
732	2.25595e-05	4.27106e-06	8.92038e-06	3.63286e-06	3.13538e-06	8.50384e-06
733	2.26703e-05	4.27106e-06	8.87487e-06	3.55872e-06	3.13538e-06	8.50207e-06
734	2.12846e-05	4.20635e-06	8.73833e-06	3.41044e-06	3.13538e-06	8.15502e-06
735	2.15063e-05	4.20635e-06	8.78384e-06	3.41044e-06	3.13538e-06	8.20846e-06
736	2.134e-05	4.20635e-06	8.78384e-06	3.41044e-06	3.13538e-06	8.1752e-06
737	2.07303e-05	4.14163e-06	8.2377e-06	3.18802e-06	3.13538e-06	7.88661e-06
738	2.07857e-05	4.14163e-06	8.2377e-06	3.18802e-06	3.13538e-06	7.89769e-06
739	2.0564e-05	4.07692e-06	8.14667e-06	3.11388e-06	3.13538e-06	7.80737e-06
740	2.0176e-05	4.01221e-06	8.01014e-06	2.89146e-06	3.13538e-06	7.64504e-06
741	1.92892e-05	3.94749e-06	7.60053e-06	2.66904e-06	3.13538e-06	7.32833e-06
742	1.89012e-05	3.94749e-06	7.55502e-06	2.66904e-06	3.13538e-06	7.24163e-06
743	1.71829e-05	3.68864e-06	7.0999e-06	2.5949e-06	3.13538e-06	6.74034e-06
744	1.70166e-05	3.68864e-06	7.00887e-06	2.5949e-06	3.13538e-06	6.68888e-06
745	1.68503e-05	3.68864e-06	7.00887e-06	2.5949e-06	2.35153e-06	6.49885e-06
746	1.37463e-05	3.23565e-06	5.64351e-06	2.07592e-06	1.56769e-06	5.25381e-06
747	6.20801e-06	1.94139e-06	3.91404e-06	1.55694e-06	1.56769e-06	3.03761e-06
748	9.36744e-06	2.20024e-06	4.64224e-06	1.63108e-06	1.56769e-06	3.88174e-06
749	9.14573e-06	2.20024e-06	4.64224e-06	1.55694e-06	1.56769e-06	3.82257e-06
750	9.81087e-06	2.20024e-06	4.91531e-06	1.55694e-06	1.56769e-06	4.01021e-06
751	9.70002e-06	2.07082e-06	4.82429e-06	1.40866e-06	1.56769e-06	3.9143e-06
752	9.8663e-06	2.07082e-06	5.00634e-06	1.40866e-06	1.56769e-06	3.98396e-06
753	9.8663e-06	2.07082e-06	4.96082e-06	1.40866e-06	1.56769e-06	3.97486e-06
754	9.92173e-06	1.94139e-06	4.96082e-06	1.40866e-06	1.56769e-06	3.96006e-06
755	8.75773e-06	8.41269e-07	3.32239e-06	3.70699e-07	1.56769e-06	2.97196e-06
756	8.75773e-06	8.41269e-07	3.32239e-06	3.70699e-07	1.56769e-06	2.97196e-06
757	8.48059e-06	8.41269e-07	3.23136e-06	3.70699e-07	1.56769e-06	2.89832e-06
758	8.48059e-06	8.41269e-07	3.23136e-06	3.70699e-07	1.56769e-06	2.89832e-06
759	6.7623e-06	7.76556e-07	2.54868e-06	1.4828e-07	7.83845e-07	2.20393e-06
760	6.7623e-06	7.76556e-07	2.54868e-06	1.4828e-07	0	2.04716e-06
761	6.7623e-06	7.76556e-07	2.54868e-06	1.4828e-07	0	2.04716e-06
762	6.70687e-06	7.76556e-07	2.54868e-06	1.4828e-07	0	2.03608e-06
763	6.54058e-06	7.76556e-07	2.36663e-06	1.4828e-07	0	1.96641e-06
764	6.59601e-06	7.76556e-07	2.36663e-06	1.4828e-07	0	1.9775e-06
765	6.3743e-06	5.82417e-07	2.2301e-06	1.4828e-07	0	1.86702e-06
766	6.48515e-06	5.82417e-07	2.2301e-06	1.4828e-07	0	1.88919e-06
767	6.15258e-06	5.17704e-07	2.13907e-06	1.4828e-07	0	1.79153e-06
768	6.3743e-06	5.17704e-07	2.13907e-06	1.4828e-07	0	1.83587e-06
769	6.3743e-06	5.17704e-07	2.13907e-06	1.4828e-07	0	1.83587e-06
770	6.3743e-06	5.17704e-07	1.95702e-06	1.4828e-07	0	1.79946e-06
771	6.42972e-06	5.17704e-07	2.00253e-06	1.4828e-07	0	1.81965e-06
772	6.3743e-06	3.23565e-07	1.866e-06	1.4828e-07	0	1.74243e-06
773	6.04172e-06	3.23565e-07	1.59293e-06	7.41399e-08	0	1.60647e-06
774	5.82001e-06	2.58852e-07	1.59293e-06	7.41399e-08	0	1.54919e-06
775	6.70687e-06	3.88278e-07	1.82049e-06	7.41399e-08	0	1.79796e-06
776	6.65144e-06	3.88278e-07	1.82049e-06	7.41399e-08	0	1.78687e-06
777	6.7623e-06	4.52991e-07	1.91151e-06	7.41399e-08	0	1.84019e-06
778	6.7623e-06	4.52991e-07	1.91151e-06	7.41399e-08	0	1.84019e-06
779	6.7623e-06	4.52991e-07	1.91151e-06	7.41399e-08	0	1.84019e-06
780	6.87315e-06	4.52991e-07	1.91151e-06	7.41399e-08	0	1.86236e-06
781	7.87087e-06	5.82417e-07	2.2301e-06	2.9656e-07	0	2.19599e-06
782	7.87087e-06	5.82417e-07	2.2301e-06	2.9656e-07	0	2.19599e-06
783	8.36973e-06	1.29426e-06	2.68522e-06	8.89679e-07	7.83845e-07	2.80455e-06
784	8.53601e-06	1.42369e-06	2.68522e-06	8.89679e-07	7.83845e-07	2.86369e-06
785	8.59144e-06	1.42369e-06	2.68522e-06	8.89679e-07	7.83845e-07	2.87477e-06
786	8.59144e-06	1.42369e-06	2.68522e-06	8.89679e-07	7.83845e-07	2.87477e-06
787	8.59144e-06	1.4884e-06	2.68522e-06	8.89679e-07	7.83845e-07	2.88772e-06
788	8.59144e-06	1.4884e-06	2.68522e-06	8.89679e-07	7.83845e-07	2.88772e-06
789	9.0903e-06	1.74725e-06	3.14034e-06	1.26038e-06	7.83845e-07	3.20442e-06
790	8.75773e-06	1.74725e-06	3.09483e-06	1.26038e-06	7.83845e-07	3.12881e-06
791	9.0903e-06	2.07082e-06	3.41341e-06	1.40866e-06	7.83845e-07	3.35341e-06
792	7.48287e-06	2.07082e-06	2.73073e-06	1.33452e-06	7.83845e-07	2.88056e-06
793	9.42287e-06	2.26496e-06	3.04931e-06	1.33452e-06	7.83845e-07	3.3711e-06
794	9.42287e-06	2.26496e-06	3.04931e-06	1.33452e-06	7.83845e-07	3.3711e-06
795	9.42287e-06	2.26496e-06	3.09483e-06	1.33452e-06	7.83845e-07	3.38021e-06
796	9.03487e-06	2.20024e-06	2.95829e-06	1.33452e-06	7.83845e-07	3.26235e-06
797	9.81087e-06	2.26496e-06	3.54995e-06	1.70522e-06	7.83845e-07	3.62297e-06
798	8.09258e-06	2.13553e-06	3.32239e-06	1.77936e-06	7.83845e-07	3.22274e-06
799	1.68503e-05	3.4945e-06	6.28068e-06	2.5949e-06	3.13538e-06	6.47115e-06
800	1.65732e-05	3.4945e-06	6.50824e-06	2.5949e-06	3.13538e-06	6.46124e-06
801	4.14606e-05	2.58852e-05	3.58636e-05	2.15747e-05	1.72446e-05	2.84057e-05
802	4.51744e-05	2.99621e-05	4.33276e-05	2.64679e-05	1.88123e-05	3.27489e-05
803	4.56178e-05	3.1127e-05	4.41013e-05	2.66904e-05	2.038e-05	3.35833e-05
804	4.83892e-05	3.30683e-05	4.74237e-05	2.92853e-05	2.038e-05	3.57093e-05
805	4.88881e-05	3.33272e-05	4.76512e-05	2.95077e-05	2.038e-05	3.59508e-05
806	4.91098e-05	3.33272e-05	4.76967e-05	2.95077e-05	2.038e-05	3.60043e-05
807	4.97749e-05	3.3586e-05	4.81063e-05	2.9656e-05	2.038e-05	3.63006e-05
808	5.11052e-05	3.39096e-05	4.888e-05	2.98042e-05	2.038e-05	3.68158e-05
809	5.14378e-05	3.39096e-05	4.90621e-05	2.99525e-05	2.038e-05	3.69484e-05
810	5.22138e-05	3.42979e-05	4.99268e-05	3.03232e-05	2.11638e-05	3.75851e-05
811	5.22692e-05	3.44273e-05	4.99723e-05	3.03232e-05	2.11638e-05	3.76312e-05
812	5.23247e-05	3.44273e-05	4.99723e-05	3.03232e-05	2.11638e-05	3.76423e-05
813	5.27681e-05	3.4492e-05	5.01544e-05	3.03974e-05	2.11638e-05	3.77951e-05
814	6.77338e-05	4.16752e-05	6.06677e-05	3.58096e-05	2.42992e-05	4.60371e-05
815	6.85098e-05	4.18693e-05	6.11683e-05	3.58837e-05	2.42992e-05	4.63461e-05
816	7.00064e-05	4.20635e-05	6.20331e-05	3.61803e-05	2.42992e-05	4.69165e-05
817	7.0339e-05	4.20635e-05	6.21241e-05	3.61803e-05	2.42992e-05	4.70012e-05
818	7.2279e-05	4.25812e-05	6.38991e-05	3.64027e-05	2.42992e-05	4.78922e-05
819	7.25007e-05	4.25812e-05	6.39901e-05	3.64027e-05	2.42992e-05	4.79548e-05
820	7.27224e-05	4.25812e-05	6.40356e-05	3.64027e-05	2.42992e-05	4.80082e-05
821	7.27224e-05	4.25812e-05	6.40356e-05	3.64027e-05	2.42992e-05	4.80082e-05
822	6.82327e-05	3.7663e-05	5.78004e-05	3.21026e-05	2.11638e-05	4.33925e-05
823	6.43527e-05	3.54627e-05	5.40684e-05	2.98784e-05	1.80284e-05	4.03581e-05
824	4.61166e-05	2.60146e-05	3.86853e-05	2.15747e-05	1.09738e-05	2.8673e-05
825	5.39875e-05	2.71795e-05	4.1325e-05	2.27609e-05	1.17577e-05	3.14021e-05
826	5.38767e-05	2.68559e-05	4.1143e-05	2.24644e-05	1.17577e-05	3.12195e-05
827	5.40429e-05	2.68559e-05	4.11885e-05	2.23902e-05	1.17577e-05	3.1247e-05
828	5.39875e-05	2.66618e-05	4.10064e-05	2.23161e-05	1.17577e-05	3.11459e-05
829	5.18258e-05	2.0514e-05	3.47713e-05	1.80901e-05	9.40614e-06	2.69215e-05
830	4.78904e-05	1.50134e-05	2.86727e-05	1.26779e-05	7.0546e-06	2.22618e-05
831	4.96087e-05	1.50781e-05	2.92643e-05	1.27521e-05	7.0546e-06	2.27516e-05
832	4.96641e-05	1.50781e-05	2.92188e-05	1.27521e-05	7.0546e-06	2.27535e-05
833	4.46755e-05	1.06129e-05	2.29381e-05	9.86061e-06	7.0546e-06	1.90283e-05
834	3.19823e-05	5.88888e-06	1.57927e-05	5.63463e-06	2.35153e-06	1.233e-05
835	3.58069e-05	5.9536e-06	1.67485e-05	5.93119e-06	2.35153e-06	1.33583e-05
836	3.60841e-05	5.88888e-06	1.6976e-05	5.93119e-06	2.35153e-06	1.34463e-05
837	3.57515e-05	5.75946e-06	1.66574e-05	5.85705e-06	2.35153e-06	1.32754e-05
838	3.56961e-05	5.75946e-06	1.65209e-05	5.85705e-06	2.35153e-06	1.3237e-05
839	3.29801e-05	4.91819e-06	1.36536e-05	4.89323e-06	2.35153e-06	1.17593e-05
840	2.24486e-05	3.04151e-06	7.8736e-06	3.18802e-06	2.35153e-06	7.78065e-06
841	3.44766e-05	4.9829e-06	1.40633e-05	4.07769e-06	2.35153e-06	1.19904e-05
842	3.54743e-05	4.91819e-06	1.41543e-05	4.37425e-06	2.35153e-06	1.22545e-05
843	3.54189e-05	4.91819e-06	1.44274e-05	4.52253e-06	2.35153e-06	1.23277e-05
844	3.51418e-05	4.4652e-06	1.44729e-05	4.30011e-06	2.35153e-06	1.21463e-05
845	3.0264e-05	3.04151e-06	1.22883e-05	3.48458e-06	7.83845e-07	9.97245e-06
846	3.49201e-05	4.01221e-06	1.5019e-05	5.48635e-06	7.83845e-07	1.20443e-05
847	3.36452e-05	3.94749e-06	1.45639e-05	5.18979e-06	7.83845e-07	1.1626e-05
848	4.70589e-05	7.442e-06	2.08901e-05	1.14175e-05	3.13538e-06	1.79888e-05
849	4.86109e-05	7.57142e-06	2.17093e-05	1.17141e-05	3.13538e-06	1.85482e-05
850	4.85555e-05	7.442e-06	2.13907e-05	1.164e-05	2.35153e-06	1.82759e-05
851	4.97749e-05	7.442e-06	2.15272e-05	1.18624e-05	2.35153e-06	1.85916e-05
852	4.81675e-05	7.24786e-06	2.12087e-05	1.18624e-05	2.35153e-06	1.81676e-05
853	5.47635e-05	9.51281e-06	2.53503e-05	1.47538e-05	2.35153e-06	2.13464e-05
854	5.48189e-05	9.4481e-06	2.53503e-05	1.47538e-05	2.35153e-06	2.13445e-05
855	5.49298e-05	9.4481e-06	2.54868e-05	1.4828e-05	2.35153e-06	2.14088e-05
856	5.49852e-05	9.4481e-06	2.54868e-05	1.4828e-05	2.35153e-06	2.14199e-05
857	5.45972e-05	9.4481e-06	2.55323e-05	1.4828e-05	2.35153e-06	2.13514e-05
858	5.45972e-05	9.4481e-06	2.55323e-05	1.4828e-05	2.35153e-06	2.13514e-05
859	5.45972e-05	9.4481e-06	2.54868e-05	1.4828e-05	2.35153e-06	2.13423e-05
860	5.35441e-05	9.38339e-06	2.49862e-05	1.47538e-05	2.35153e-06	2.10038e-05
861	5.03847e-05	8.54212e-06	2.30291e-05	1.44573e-05	2.35153e-06	1.9753e-05
862	5.26018e-05	8.93039e-06	2.37573e-05	1.4828e-05	3.13538e-06	2.06506e-05
863	5.24909e-05	8.86568e-06	2.37573e-05	1.4828e-05	3.13538e-06	2.06155e-05
864	5.22692e-05	8.86568e-06	2.36663e-05	1.47538e-05	3.13538e-06	2.05381e-05
865	5.22692e-05	8.86568e-06	2.36208e-05	1.47538e-05	3.13538e-06	2.0529e-05
866	5.18258e-05	8.67154e-06	2.34843e-05	1.47538e-05	3.13538e-06	2.03742e-05
867	3.44766e-05	4.52991e-06	1.14691e-05	6.67259e-06	2.35153e-06	1.18999e-05
868	3.47538e-05	4.65934e-06	1.17421e-05	6.74673e-06	2.35153e-06	1.20507e-05
869	3.44212e-05	4.59462e-06	1.18332e-05	6.82087e-06	2.35153e-06	1.20043e-05
870	3.42549e-05	4.59462e-06	1.18332e-05	6.82087e-06	2.35153e-06	1.1971e-05
871	2.84903e-05	4.20635e-06	9.19345e-06	5.70877e-06	1.56769e-06	9.83331e-06
872	2.83795e-05	4.14163e-06	9.19345e-06	5.63463e-06	1.56769e-06	9.78338e-06
873	2.68275e-05	3.81807e-06	8.51077e-06	5.26393e-06	1.56769e-06	9.19759e-06
874	1.60743e-05	1.61783e-06	5.50697e-06	2.74318e-06	1.56769e-06	5.50199e-06
875	1.58526e-05	1.55311e-06	5.37043e-06	2.74318e-06	1.56769e-06	5.4174e-06
876	1.22497e-05	1.29426e-06	4.23263e-06	1.92764e-06	1.56769e-06	4.25438e-06
877	1.29149e-05	1.42369e-06	4.46019e-06	1.8535e-06	1.56769e-06	4.44399e-06
878	1.25823e-05	1.29426e-06	4.41468e-06	1.77936e-06	1.56769e-06	4.32766e-06
879	1.10857e-05	1.22955e-06	3.732e-06	1.40866e-06	1.56769e-06	3.80472e-06
880	1.29149e-05	1.42369e-06	4.27814e-06	1.70522e-06	1.56769e-06	4.37793e-06
881	1.29149e-05	1.42369e-06	4.27814e-06	1.70522e-06	1.56769e-06	4.37793e-06
882	1.29149e-05	1.42369e-06	4.27814e-06	1.70522e-06	1.56769e-06	4.37793e-06
883	1.19172e-05	1.42369e-06	4.09609e-06	1.70522e-06	1.56769e-06	4.14198e-06
884	9.31202e-06	1.22955e-06	3.82302e-06	1.63108e-06	7.83845e-07	3.3559e-06
885	9.70002e-06	1.22955e-06	3.82302e-06	1.8535e-06	7.83845e-07	3.47799e-06
886	5.59829e-06	7.76556e-07	1.95702e-06	1.40866e-06	7.83845e-07	2.10487e-06
887	7.5383e-06	9.05982e-07	2.82175e-06	1.77936e-06	0	2.60908e-06
888	7.03944e-06	7.11843e-07	2.68522e-06	1.70522e-06	0	2.42834e-06
889	6.48515e-06	7.11843e-07	2.50317e-06	1.33452e-06	0	2.20694e-06
890	8.09258e-06	7.76556e-07	2.77624e-06	1.33452e-06	0	2.59598e-06
891	8.09258e-06	7.76556e-07	2.77624e-06	1.33452e-06	0	2.59598e-06
892	8.3143e-06	8.41269e-07	2.86727e-06	1.40866e-06	0	2.6863e-06
893	8.03716e-06	7.76556e-07	2.73073e-06	1.40866e-06	0	2.59062e-06
894	1.30812e-05	1.35897e-06	4.55121e-06	1.8535e-06	0	4.16898e-06
895	1.3192e-05	1.35897e-06	4.55121e-06	1.8535e-06	0	4.19114e-06
896	1.33029e-05	1.35897e-06	4.64224e-06	1.8535e-06	0	4.23152e-06
897	1.33583e-05	1.35897e-06	4.64224e-06	1.8535e-06	0	4.2426e-06
898	1.31366e-05	1.29426e-06	4.5057e-06	1.8535e-06	0	4.15801e-06
899	1.3192e-05	1.29426e-06	4.46019e-06	1.77936e-06	0	4.14516e-06
900	1.33029e-05	1.4884e-06	4.36917e-06	2.00178e-06	0	4.23245e-06
901	1.23052e-05	1.4884e-06	4.18712e-06	1.77936e-06	0	3.95202e-06
902	4.99967e-05	7.37728e-06	1.94792e-05	1.04537e-05	6.27076e-06	1.87155e-05
903	5.14932e-05	7.57142e-06	2.01164e-05	1.08986e-05	6.27076e-06	1.92701e-05
904	5.21029e-05	7.57142e-06	2.01619e-05	1.10468e-05	7.0546e-06	1.95875e-05
905	5.22138e-05	7.57142e-06	2.01164e-05	1.10468e-05	7.0546e-06	1.96006e-05
906	5.59829e-05	7.9597e-06	2.12997e-05	1.1121e-05	7.83845e-06	2.08404e-05
907	5.60938e-05	8.02441e-06	2.12087e-05	1.10468e-05	7.83845e-06	2.08424e-05
908	7.86533e-05	1.10012e-05	2.9947e-05	1.97954e-05	1.17577e-05	3.02309e-05
909	7.97064e-05	1.10012e-05	3.03566e-05	1.98695e-05	1.17577e-05	3.05383e-05
910	8.44733e-05	1.28132e-05	3.48168e-05	2.44662e-05	1.17577e-05	3.36654e-05
911	8.53047e-05	1.30073e-05	3.54995e-05	2.4911e-05	1.17577e-05	3.4096e-05
912	8.56373e-05	1.3072e-05	3.54995e-05	2.50593e-05	1.17577e-05	3.42052e-05
913	8.40298e-05	1.28779e-05	3.47258e-05	2.4911e-05	1.17577e-05	3.36604e-05
914	0.00011252	3.48156e-05	6.22151e-05	5.36031e-05	1.88123e-05	5.63932e-05
915	0.000115901	3.68864e-05	6.65843e-05	5.84964e-05	1.95961e-05	5.94928e-05
916	0.000116511	3.74041e-05	6.76311e-05	5.94602e-05	1.95961e-05	6.01205e-05
917	0.000118008	3.85042e-05	6.9133e-05	6.07206e-05	1.95961e-05	6.11924e-05
918	0.000117952	3.86337e-05	6.91785e-05	6.0943e-05	1.95961e-05	6.12607e-05
919	0.000115458	3.83101e-05	6.81317e-05	6.10913e-05	1.95961e-05	6.05174e-05
920	0.000141232	4.08339e-05	7.97373e-05	6.58362e-05	2.038e-05	6.96039e-05
921	0.0001455	4.1481e-05	8.18308e-05	6.62069e-05	2.038e-05	7.10797e-05
922	0.000140955	3.99279e-05	7.88726e-05	6.34638e-05	1.95961e-05	6.85631e-05
923	0.000195552	5.57826e-05	0.000114736	7.56968e-05	2.35153e-05	9.30565e-05
924	0.000198047	5.62356e-05	0.000116101	7.59934e-05	2.35153e-05	9.39785e-05
925	0.00020043	5.68827e-05	0.000117512	7.61417e-05	2.35153e-05	9.48963e-05
926	0.000200929	5.69474e-05	0.000117649	7.61417e-05	2.35153e-05	9.50365e-05
927	0.000200818	5.66239e-05	0.000117194	7.56968e-05	2.35153e-05	9.47696e-05
928	0.000201428	5.66239e-05	0.000117512	7.56968e-05	2.35153e-05	9.49552e-05
929	0.000201206	5.65592e-05	0.000117512	7.55486e-05	2.35153e-05	9.48682e-05
930	0.00020043	5.64297e-05	0.000116966	7.4733e-05	2.35153e-05	9.44148e-05
931	0.000200153	5.6365e-05	0.000116739	7.41399e-05	2.35153e-05	9.41824e-05
932	0.000199876	5.62356e-05	0.000116739	7.39916e-05	2.35153e-05	9.40715e-05
933	0.000199654	5.5912e-05	0.000115965	7.29537e-05	2.27315e-05	9.34432e-05
934	0.000194555	5.18351e-05	0.000110412	6.62069e-05	1.95961e-05	8.8521e-05
935	0.000192337	4.97643e-05	0.0001075	6.25741e-05	1.72446e-05	8.5884e-05
936	0.00018818	4.69816e-05	0.000102721	5.75326e-05	1.33254e-05	8.17481e-05
937	0.000172328	3.6304e-05	8.64731e-05	4.26304e-05	1.17577e-05	6.98986e-05
938	0.000133417	2.30378e-05	6.22151e-05	2.18713e-05	4.70307e-06	4.90489e-05
939	0.000152484	2.86679e-05	7.50495e-05	2.8099e-05	1.33254e-05	5.95252e-05
940	0.000152595	2.86679e-05	7.51861e-05	2.8099e-05	1.33254e-05	5.95747e-05
941	0.000151099	2.78913e-05	7.41848e-05	2.758e-05	1.41092e-05	5.89729e-05
942	0.000149048	2.705e-05	7.13631e-05	2.72835e-05	1.41092e-05	5.77708e-05
943	0.000122442	1.86373e-05	5.22935e-05	2.07592e-05	1.33254e-05	4.54915e-05
944	0.000130091	2.39438e-05	5.98485e-05	2.60231e-05	1.56769e-05	5.11167e-05
945	0.000129592	2.38791e-05	5.9803e-05	2.58007e-05	1.56769e-05	5.09503e-05
946	0.00012671	2.36202e-05	5.85286e-05	2.46886e-05	1.4893e-05	4.96881e-05
947	0.000127541	2.39438e-05	5.88017e-05	2.47627e-05	1.4893e-05	4.99884e-05
948	0.000124825	2.38144e-05	5.74818e-05	2.43179e-05	1.4893e-05	4.90664e-05
949	7.89858e-05	1.65018e-05	3.75475e-05	1.77194e-05	1.33254e-05	3.2816e-05
950	8.25333e-05	1.70195e-05	3.87308e-05	1.86833e-05	1.41092e-05	3.42152e-05
951	8.23116e-05	1.69548e-05	3.85488e-05	1.86091e-05	1.41092e-05	3.41067e-05
952	6.17475e-05	1.45604e-05	3.04021e-05	1.73487e-05	1.33254e-05	2.74768e-05
953	6.2967e-05	1.46899e-05	3.08117e-05	1.81643e-05	1.33254e-05	2.79917e-05
954	6.23018e-05	1.46899e-05	3.08117e-05	1.82384e-05	1.33254e-05	2.78734e-05
955	6.1415e-05	1.46251e-05	3.07207e-05	1.82384e-05	1.33254e-05	2.76649e-05
956	5.77567e-05	1.43663e-05	3.03111e-05	1.77936e-05	1.33254e-05	2.67106e-05
957	5.97521e-05	1.47546e-05	3.06297e-05	1.8535e-05	1.33254e-05	2.73994e-05
958	5.88098e-05	1.43663e-05	2.95829e-05	1.76453e-05	1.33254e-05	2.67459e-05
959	5.93641e-05	1.43663e-05	2.95829e-05	1.77194e-05	1.33254e-05	2.68716e-05
960	5.76458e-05	1.3978e-05	2.89457e-05	1.73487e-05	1.25415e-05	2.60919e-05
961	5.57058e-05	1.34603e-05	2.70342e-05	1.63108e-05	1.09738e-05	2.4697e-05
962	5.24909e-05	1.18425e-05	2.38939e-05	1.4828e-05	7.83845e-06	2.21788e-05
963	3.95761e-05	6.21245e-06	1.31985e-05	9.19335e-06	3.13538e-06	1.42632e-05
964	2.49983e-05	3.88278e-06	7.73707e-06	5.93119e-06	2.35153e-06	8.98017e-06
965	2.74372e-05	4.01221e-06	8.32872e-06	6.15361e-06	3.13538e-06	9.81342e-06
966	2.73818e-05	3.94749e-06	8.46526e-06	6.15361e-06	3.13538e-06	9.81671e-06
967	2.0176e-05	2.58852e-06	6.3717e-06	5.18979e-06	1.56769e-06	7.17874e-06
968	2.61623e-05	3.30036e-06	9.87614e-06	6.37603e-06	1.56769e-06	9.4565e-06
969	2.6384e-05	3.42979e-06	1.00582e-05	6.59845e-06	1.56769e-06	9.60763e-06
970	2.03977e-05	2.65323e-06	7.8736e-06	4.81909e-06	7.83845e-07	7.30549e-06
971	2.55526e-05	4.07692e-06	1.16056e-05	6.30189e-06	1.56769e-06	9.82094e-06
972	2.59406e-05	4.33577e-06	1.18332e-05	6.30189e-06	1.56769e-06	9.99583e-06
973	2.53863e-05	4.52991e-06	1.18787e-05	6.22775e-06	1.56769e-06	9.91807e-06
974	3.24812e-05	9.70695e-06	1.90241e-05	9.41577e-06	2.35153e-06	1.45959e-05
975	3.26475e-05	9.9658e-06	1.93882e-05	9.78647e-06	2.35153e-06	1.48279e-05
976	3.29246e-05	1.03541e-05	2.00709e-05	1.0083e-05	2.35153e-06	1.51568e-05
977	3.29246e-05	1.03541e-05	2.02074e-05	1.0083e-05	2.35153e-06	1.51841e-05
978	3.29246e-05	1.04188e-05	2.02074e-05	1.0083e-05	2.35153e-06	1.51971e-05
979	3.29246e-05	1.04188e-05	2.01619e-05	1.0083e-05	2.35153e-06	1.5188e-05
980	3.29246e-05	1.04188e-05	2.01619e-05	1.0083e-05	2.35153e-06	1.5188e-05
981	3.29246e-05	1.04188e-05	2.01619e-05	1.0083e-05	2.35153e-06	1.5188e-05
982	3.27583e-05	1.02247e-05	2.00709e-05	1.00089e-05	2.35153e-06	1.50829e-05
983	3.22041e-05	1.01599e-05	1.98888e-05	1.00089e-05	2.35153e-06	1.49226e-05
984	3.22595e-05	1.02247e-05	1.98888e-05	1.00089e-05	2.35153e-06	1.49467e-05
985	3.19269e-05	1.02247e-05	1.97978e-05	9.93475e-06	2.35153e-06	1.48471e-05
986	3.12063e-05	1.02247e-05	1.96612e-05	9.71233e-06	2.35153e-06	1.46312e-05
987	3.03195e-05	1.01599e-05	1.93882e-05	9.34163e-06	2.35153e-06	1.43122e-05
988	2.72155e-05	9.64224e-06	1.82959e-05	8.52609e-06	2.35153e-06	1.32063e-05
989	2.72709e-05	9.70695e-06	1.82959e-05	8.52609e-06	2.35153e-06	1.32303e-05
990	2.43332e-05	9.18925e-06	1.70671e-05	7.63641e-06	2.35153e-06	1.21155e-05
991	2.31692e-05	8.67154e-06	1.63844e-05	7.11743e-06	2.35153e-06	1.15388e-05
992	2.31692e-05	8.67154e-06	1.63844e-05	7.04329e-06	2.35153e-06	1.1524e-05
993	2.25595e-05	8.54212e-06	1.60658e-05	6.82087e-06	2.35153e-06	1.1268e-05
994	2.22269e-05	8.4774e-06	1.58382e-05	6.67259e-06	2.35153e-06	1.11133e-05
995	1.75709e-05	6.14774e-06	1.16511e-05	5.56049e-06	1.56769e-06	8.49958e-06
996	1.54646e-05	4.59462e-06	9.46653e-06	3.78113e-06	7.83845e-07	6.81815e-06
997	7.26115e-06	2.26496e-06	3.91404e-06	1.4828e-06	7.83845e-07	3.14136e-06
998	9.64459e-06	2.39438e-06	4.23263e-06	1.77936e-06	0	3.61019e-06
999	9.75544e-06	2.32967e-06	4.18712e-06	1.8535e-06	0	3.62515e-06
1000	9.64459e-06	2.26496e-06	3.95956e-06	1.8535e-06	0	3.54452e-06
1001	6.7623e-06	6.4713e-07	1.27434e-06	5.18979e-07	0	1.84055e-06
1002	8.7023e-06	7.76556e-07	1.77497e-06	5.18979e-07	0	2.35456e-06
1003	8.36973e-06	7.11843e-07	1.68395e-06	5.18979e-07	0	2.2569e-06
1004	7.64916e-06	5.82417e-07	1.72946e-06	4.44839e-07	0	2.08118e-06
1005	9.25659e-06	5.82417e-07	2.00253e-06	6.67259e-07	0	2.50176e-06
1006	9.42287e-06	5.17704e-07	1.95702e-06	6.67259e-07	0	2.51297e-06
1007	9.70002e-06	5.17704e-07	2.04805e-06	8.15539e-07	0	2.61626e-06
1008	9.58916e-06	5.82417e-07	2.00253e-06	8.15539e-07	0	2.59793e-06
1009	8.64687e-06	5.17704e-07	1.72946e-06	8.15539e-07	0	2.34191e-06
1010	9.64459e-06	7.11843e-07	1.72946e-06	8.89679e-07	0	2.59511e-06
1011	9.75544e-06	7.11843e-07	1.72946e-06	8.89679e-07	0	2.61728e-06
1012	9.75544e-06	7.11843e-07	1.72946e-06	8.89679e-07	0	2.61728e-06
1013	9.25659e-06	5.82417e-07	1.59293e-06	8.89679e-07	0	2.46432e-06
1014	1.10857e-05	6.4713e-07	1.95702e-06	1.03796e-06	0	2.94556e-06
1015	1.10303e-05	6.4713e-07	1.866e-06	1.03796e-06	0	2.91628e-06
1016	1.73492e-05	1.55311e-06	3.77751e-06	1.77936e-06	0	4.89184e-06
1017	1.75155e-05	1.61783e-06	3.82302e-06	1.77936e-06	0	4.94714e-06
1018	1.76263e-05	1.61783e-06	3.77751e-06	1.77936e-06	0	4.9602e-06
1019	1.79589e-05	1.61783e-06	3.95956e-06	2.00178e-06	0	5.10761e-06
1020	1.79589e-05	1.61783e-06	3.95956e-06	2.00178e-06	0	5.10761e-06
1021	1.79589e-05	1.61783e-06	3.95956e-06	2.00178e-06	0	5.10761e-06
1022	1.7848e-05	1.61783e-06	3.95956e-06	1.92764e-06	0	5.07061e-06
1023	1.7848e-05	1.61783e-06	3.95956e-06	1.92764e-06	0	5.07061e-06
1024	1.77926e-05	1.61783e-06	3.95956e-06	1.8535e-06	0	5.0447e-06
1025	1.76817e-05	1.55311e-06	3.95956e-06	1.8535e-06	0	5.00957e-06
1026	1.55755e-05	1.42369e-06	3.18585e-06	1.77936e-06	0	4.39288e-06
1027	1.57972e-05	1.42369e-06	3.18585e-06	1.77936e-06	1.56769e-06	4.75076e-06
1028	1.5132e-05	1.35897e-06	3.09483e-06	1.63108e-06	1.56769e-06	4.55691e-06
1029	1.25823e-05	1.29426e-06	2.86727e-06	1.26038e-06	1.56769e-06	3.91438e-06
1030	1.54092e-05	1.61783e-06	3.27687e-06	1.4828e-06	1.56769e-06	4.67088e-06
1031	1.54092e-05	1.61783e-06	3.27687e-06	1.4828e-06	1.56769e-06	4.67088e-06
1032	1.54092e-05	1.61783e-06	3.27687e-06	1.4828e-06	1.56769e-06	4.67088e-06
1033	1.46332e-05	1.55311e-06	3.09483e-06	1.33452e-06	1.56769e-06	4.43667e-06
1034	1.52429e-05	2.07082e-06	3.732e-06	1.40866e-06	1.56769e-06	4.80441e-06
1035	1.51875e-05	2.07082e-06	3.732e-06	1.40866e-06	1.56769e-06	4.79333e-06
1036	1.48549e-05	2.0061e-06	3.45892e-06	1.33452e-06	1.56769e-06	4.64443e-06
1037	1.33583e-05	1.74725e-06	3.14034e-06	1.1121e-06	1.56769e-06	4.18514e-06
1038	1.47995e-05	1.68254e-06	3.45892e-06	1.18624e-06	1.56769e-06	4.53898e-06
1039	1.45223e-05	1.61783e-06	3.04931e-06	1.1121e-06	1.56769e-06	4.37385e-06
1040	1.46886e-05	1.68254e-06	3.18585e-06	1.18624e-06	1.56769e-06	4.46218e-06
1041	1.01434e-05	1.42369e-06	2.00253e-06	7.41399e-07	1.56769e-06	3.17574e-06
1042	1.76817e-05	2.84737e-06	5.05185e-06	3.41044e-06	2.35153e-06	6.26858e-06
1043	1.80697e-05	2.91209e-06	5.2339e-06	3.3363e-06	2.35153e-06	6.3807e-06
1044	1.82915e-05	2.9768e-06	5.32492e-06	3.41044e-06	2.35153e-06	6.47104e-06
1045	1.77372e-05	2.91209e-06	5.2339e-06	3.3363e-06	2.35153e-06	6.3142e-06
1046	1.96217e-05	3.75335e-06	6.46273e-06	4.07769e-06	3.13538e-06	7.41017e-06
1047	2.00097e-05	4.01221e-06	6.91785e-06	4.07769e-06	3.91922e-06	7.78733e-06
1048	1.91229e-05	3.81807e-06	7.00887e-06	4.67081e-06	7.0546e-06	8.33505e-06
1049	5.82001e-05	1.52076e-05	2.8263e-05	2.46886e-05	2.19477e-05	2.96614e-05
1050	5.97521e-05	1.54664e-05	3.02201e-05	2.52076e-05	2.19477e-05	3.05188e-05
1051	6.00847e-05	1.55311e-05	3.03111e-05	2.52817e-05	2.19477e-05	3.06313e-05
1052	6.00847e-05	1.55311e-05	3.04021e-05	2.52817e-05	2.19477e-05	3.06495e-05
1053	5.99184e-05	1.55311e-05	3.04021e-05	2.53558e-05	2.19477e-05	3.0631e-05
1054	6.0251e-05	1.55311e-05	3.04476e-05	2.53558e-05	2.19477e-05	3.07066e-05
1055	6.0251e-05	1.54664e-05	3.04476e-05	2.53558e-05	2.19477e-05	3.06937e-05
1056	6.0251e-05	1.54664e-05	3.04476e-05	2.543e-05	2.19477e-05	3.07085e-05
1057	5.96412e-05	1.52076e-05	3.00835e-05	2.53558e-05	2.19477e-05	3.04472e-05
1058	5.91978e-05	1.5337e-05	3.0038e-05	2.53558e-05	2.19477e-05	3.03753e-05
1059	6.31332e-05	1.56605e-05	3.14489e-05	2.64679e-05	2.35153e-05	3.20452e-05
1060	6.32441e-05	1.57253e-05	3.14034e-05	2.65421e-05	2.35153e-05	3.2086e-05
1061	6.23018e-05	1.54017e-05	3.15854e-05	2.66162e-05	2.35153e-05	3.18841e-05
1062	0.000105924	2.7503e-05	5.31582e-05	4.9303e-05	3.91922e-05	5.50161e-05
1063	0.000112576	3.04151e-05	5.8028e-05	5.54566e-05	4.5463e-05	6.03877e-05
1064	0.000112908	3.0674e-05	5.83921e-05	5.63463e-05	4.5463e-05	6.07567e-05
1065	0.000148272	5.37765e-05	9.02506e-05	9.40835e-05	8.70068e-05	9.46779e-05
1066	0.000152318	5.59767e-05	9.39371e-05	9.82354e-05	9.01421e-05	9.81219e-05
1067	0.000152595	5.60415e-05	9.39371e-05	9.83836e-05	9.01421e-05	9.82199e-05
1068	0.000152928	5.63003e-05	9.43012e-05	9.86802e-05	9.0926e-05	9.86271e-05
1069	0.000152983	5.62356e-05	9.43012e-05	9.81612e-05	9.01421e-05	9.83646e-05
1070	0.000153039	5.62356e-05	9.43467e-05	9.81612e-05	9.01421e-05	9.83849e-05
1071	0.000152928	5.61062e-05	9.43467e-05	9.80129e-05	9.01421e-05	9.83072e-05
1072	0.000151376	5.48766e-05	9.25717e-05	9.69008e-05	8.93583e-05	9.70167e-05
1073	0.000151154	5.42942e-05	9.23442e-05	9.58629e-05	8.85744e-05	9.64459e-05
1074	0.000151487	5.42942e-05	9.20256e-05	9.57146e-05	8.85744e-05	9.64192e-05
1075	0.000143505	5.15763e-05	8.66551e-05	9.17111e-05	8.54391e-05	9.17773e-05
1076	0.000155921	5.52002e-05	9.71684e-05	9.71974e-05	8.85744e-05	9.88123e-05
1077	0.000156309	5.49413e-05	9.7214e-05	9.6975e-05	8.85744e-05	9.88027e-05
1078	0.000156808	5.50061e-05	9.75325e-05	9.70491e-05	8.77906e-05	9.88373e-05
1079	0.000157307	5.51355e-05	9.80787e-05	9.69008e-05	8.70068e-05	9.88858e-05
1080	0.000153759	5.35177e-05	9.57121e-05	9.4306e-05	8.46552e-05	9.639e-05
1081	0.000155422	5.39706e-05	9.65768e-05	9.34163e-05	8.46552e-05	9.68082e-05
1082	0.000155145	5.39059e-05	9.66678e-05	9.30456e-05	8.46552e-05	9.66839e-05
1083	0.00015448	5.35177e-05	9.60761e-05	9.20076e-05	8.46552e-05	9.61473e-05
1084	0.000153925	5.31941e-05	9.52569e-05	9.06731e-05	8.46552e-05	9.55409e-05
1085	0.000121001	3.45567e-05	6.89054e-05	5.4048e-05	5.40853e-05	6.65193e-05
1086	0.000132585	3.71453e-05	7.5095e-05	5.75326e-05	5.48691e-05	7.14454e-05
1087	0.000132474	3.66923e-05	7.47765e-05	5.70877e-05	5.48691e-05	7.11799e-05
1088	0.000132696	3.66923e-05	7.46399e-05	5.71619e-05	5.48691e-05	7.12118e-05
1089	0.00012998	3.44273e-05	7.25919e-05	5.31583e-05	5.09499e-05	6.82215e-05
1090	0.000121167	2.53028e-05	6.22606e-05	4.3446e-05	3.37053e-05	5.71763e-05
1091	0.000121666	2.51086e-05	6.25337e-05	4.24822e-05	3.29215e-05	5.69424e-05
1092	9.1291e-05	1.41074e-05	4.32821e-05	2.29092e-05	9.40614e-06	3.61992e-05
1093	9.38962e-05	1.52076e-05	4.53301e-05	2.37989e-05	1.019e-05	3.76846e-05
1094	9.20116e-05	1.50134e-05	4.42833e-05	2.29834e-05	1.019e-05	3.68963e-05
1095	8.47504e-05	1.43663e-05	4.08244e-05	2.00178e-05	7.0546e-06	3.34027e-05
1096	5.99738e-05	1.17778e-05	3.14489e-05	1.49021e-05	4.70307e-06	2.45611e-05
1097	6.79001e-05	1.28779e-05	3.51354e-05	1.57918e-05	4.70307e-06	2.72817e-05
1098	6.79001e-05	1.28132e-05	3.51809e-05	1.57918e-05	4.70307e-06	2.72778e-05
1099	5.74795e-05	1.01599e-05	2.66246e-05	1.18624e-05	3.91922e-06	2.20091e-05
1100	5.78121e-05	9.9658e-06	2.62605e-05	1.14175e-05	3.91922e-06	2.1875e-05
1101	5.04401e-05	8.54212e-06	2.23465e-05	9.26749e-06	3.91922e-06	1.89031e-05
1102	5.26572e-05	8.86568e-06	2.32112e-05	9.78647e-06	4.70307e-06	1.98447e-05
1103	5.24355e-05	8.80097e-06	2.30747e-05	9.71233e-06	4.70307e-06	1.97453e-05
1104	5.29898e-05	8.93039e-06	2.34388e-05	9.71233e-06	4.70307e-06	1.99549e-05
1105	4.81675e-05	7.83027e-06	2.01164e-05	7.71055e-06	3.13538e-06	1.7392e-05
1106	5.48189e-05	1.05482e-05	2.65791e-05	8.82265e-06	3.13538e-06	2.07808e-05
1107	5.48189e-05	1.05482e-05	2.65791e-05	8.74851e-06	3.13538e-06	2.0766e-05
1108	5.47635e-05	1.05482e-05	2.64881e-05	8.67437e-06	3.13538e-06	2.07219e-05
1109	5.46527e-05	1.05482e-05	2.64881e-05	8.52609e-06	3.13538e-06	2.06701e-05
1110	5.11052e-05	8.54212e-06	2.29381e-05	6.22775e-06	3.13538e-06	1.83897e-05
1111	4.88327e-05	7.83027e-06	2.21644e-05	5.93119e-06	3.13538e-06	1.75788e-05
1112	2.90446e-05	5.37118e-06	1.44274e-05	4.07769e-06	7.83845e-07	1.07409e-05
1113	3.79686e-05	9.18925e-06	1.93882e-05	6.52431e-06	7.83845e-07	1.47708e-05
1114	3.85229e-05	9.64224e-06	2.00709e-05	6.74673e-06	7.83845e-07	1.51533e-05
1115	3.84675e-05	1.09365e-05	2.2392e-05	7.78469e-06	7.83845e-07	1.60729e-05
1116	4.63384e-05	1.32662e-05	2.68067e-05	8.82265e-06	2.35153e-06	1.95171e-05
1117	4.24584e-05	1.28132e-05	2.48041e-05	7.93297e-06	2.35153e-06	1.8072e-05
1118	5.99738e-05	1.87668e-05	3.40886e-05	1.5347e-05	7.83845e-06	2.72029e-05
1119	5.94195e-05	1.87668e-05	3.41796e-05	1.52728e-05	7.83845e-06	2.70954e-05
1120	6.24127e-05	1.94786e-05	3.52719e-05	1.63108e-05	8.62229e-06	2.84193e-05
1121	8.63579e-05	3.13858e-05	5.70722e-05	2.77283e-05	2.5083e-05	4.55254e-05
1122	8.69676e-05	3.15799e-05	5.75274e-05	2.79507e-05	2.5083e-05	4.58217e-05
1123	8.7411e-05	3.15152e-05	5.8028e-05	2.81732e-05	2.5083e-05	4.60421e-05
1124	8.77436e-05	3.15152e-05	5.8028e-05	2.81732e-05	2.5083e-05	4.61086e-05
1125	8.69676e-05	3.11917e-05	5.69812e-05	2.83956e-05	2.5083e-05	4.57238e-05
1126	0.000101933	4.847e-05	7.36842e-05	4.52995e-05	3.21376e-05	6.03049e-05
1127	0.000102709	5.0282e-05	7.50495e-05	4.64857e-05	3.29215e-05	6.14895e-05
1128	0.000106146	5.38412e-05	7.94642e-05	5.086e-05	3.37053e-05	6.48033e-05
1129	0.00010537	5.48766e-05	7.96918e-05	5.24169e-05	3.37053e-05	6.52121e-05
1130	0.000114959	6.45836e-05	9.06602e-05	6.12396e-05	3.68407e-05	7.36566e-05
1131	0.000116234	6.58131e-05	9.32089e-05	6.30189e-05	3.84084e-05	7.53367e-05
1132	0.000116068	6.58778e-05	9.30268e-05	6.30931e-05	3.84084e-05	7.52948e-05
1133	0.000116234	6.59425e-05	9.32999e-05	6.30931e-05	3.84084e-05	7.53956e-05
1134	0.000116289	6.58778e-05	9.31634e-05	6.30189e-05	3.84084e-05	7.53515e-05
1135	0.000116178	6.56837e-05	9.31634e-05	6.29448e-05	3.84084e-05	7.52757e-05
1136	0.000116178	6.54248e-05	9.30723e-05	6.27965e-05	3.84084e-05	7.5176e-05
1137	0.000112409	6.18656e-05	8.74744e-05	5.93119e-05	3.5273e-05	7.12668e-05
1138	0.000107753	6.05067e-05	8.48346e-05	5.84222e-05	3.44892e-05	6.92011e-05
1139	0.0001215	7.84969e-05	0.000100991	7.58451e-05	5.17337e-05	8.57133e-05
1140	0.000123052	8.26385e-05	0.00010577	8.14056e-05	5.48691e-05	8.9547e-05
1141	0.000123107	8.28326e-05	0.000105952	8.15539e-05	5.48691e-05	8.96629e-05
1142	0.000122719	8.32209e-05	0.000105998	8.15539e-05	5.48691e-05	8.96722e-05
1143	0.000122664	8.36739e-05	0.000105907	8.15539e-05	5.48691e-05	8.97336e-05
1144	0.000122497	8.38033e-05	0.000106089	8.12573e-05	5.40853e-05	8.95464e-05
1145	0.000120003	8.20561e-05	0.000103586	7.86624e-05	5.33014e-05	8.75218e-05
1146	0.000119061	8.14737e-05	0.000103131	7.80693e-05	5.33014e-05	8.70073e-05
1147	0.000118008	7.90793e-05	0.000100809	7.58451e-05	5.33014e-05	8.54086e-05
1148	9.47276e-05	5.7271e-05	7.63239e-05	5.68653e-05	4.23276e-05	6.55031e-05
1149	9.50602e-05	5.83064e-05	7.77348e-05	5.6717e-05	4.23276e-05	6.60292e-05
1150	9.45613e-05	5.79181e-05	7.72796e-05	5.59015e-05	4.23276e-05	6.55976e-05
1151	6.81773e-05	4.44578e-05	5.89837e-05	4.10735e-05	3.44892e-05	4.94363e-05
1152	6.92304e-05	4.45225e-05	5.92113e-05	4.12218e-05	3.44892e-05	4.9735e-05
1153	6.35767e-05	4.34871e-05	5.69357e-05	4.00355e-05	3.05699e-05	4.6921e-05
1154	6.7235e-05	4.3293e-05	5.71633e-05	3.99614e-05	3.05699e-05	4.76445e-05
1155	6.7235e-05	4.32283e-05	5.70267e-05	3.99614e-05	3.05699e-05	4.76043e-05
1156	6.31332e-05	4.17399e-05	5.45691e-05	3.91459e-05	3.05699e-05	4.58316e-05
1157	6.65698e-05	4.18693e-05	5.58434e-05	3.96648e-05	3.13538e-05	4.70602e-05
1158	6.65698e-05	4.18693e-05	5.57979e-05	3.96648e-05	3.13538e-05	4.70511e-05
1159	6.61264e-05	4.15457e-05	5.54338e-05	3.8701e-05	2.97861e-05	4.63186e-05
1160	6.58492e-05	4.13516e-05	5.48877e-05	3.78855e-05	2.82184e-05	4.56385e-05
1161	6.59047e-05	4.12222e-05	5.48877e-05	3.78113e-05	2.82184e-05	4.56089e-05
1162	6.23572e-05	3.92161e-05	5.22479e-05	3.57354e-05	2.82184e-05	4.3555e-05
1163	3.37561e-05	7.18314e-06	1.66119e-05	6.96915e-06	1.17577e-05	1.52556e-05
1164	3.44212e-05	6.989e-06	1.62478e-05	7.11743e-06	1.09738e-05	1.51498e-05
1165	3.00423e-05	5.9536e-06	1.31985e-05	4.96737e-06	9.40614e-06	1.27136e-05
1166	2.0564e-05	4.72405e-06	9.60306e-06	3.85527e-06	4.70307e-06	8.68989e-06
1167	2.40006e-05	5.37118e-06	1.08774e-05	4.74495e-06	4.70307e-06	9.93944e-06
1168	2.4056e-05	5.24175e-06	1.06954e-05	4.67081e-06	4.70307e-06	9.87341e-06
1169	2.16726e-05	2.58852e-06	6.78131e-06	3.41044e-06	1.56769e-06	7.20411e-06
1170	2.43332e-05	2.9768e-06	7.8736e-06	3.92941e-06	1.56769e-06	8.13614e-06
1171	2.42778e-05	3.04151e-06	7.82809e-06	3.92941e-06	1.56769e-06	8.1289e-06
1172	2.46658e-05	3.04151e-06	8.2377e-06	3.92941e-06	1.56769e-06	8.28842e-06
1173	2.51092e-05	3.04151e-06	8.73833e-06	4.07769e-06	1.56769e-06	8.50688e-06
1174	2.50538e-05	3.23565e-06	9.01141e-06	4.37425e-06	1.56769e-06	8.64856e-06
1175	2.43332e-05	3.10622e-06	8.69282e-06	4.22597e-06	1.56769e-06	8.38518e-06
1176	1.85686e-05	2.52381e-06	6.69029e-06	3.26216e-06	1.56769e-06	6.52251e-06
1177	2.134e-05	2.78266e-06	7.28194e-06	3.92941e-06	7.83845e-07	7.22357e-06
1178	2.15063e-05	2.78266e-06	7.32746e-06	3.92941e-06	7.83845e-07	7.26594e-06
1179	2.16726e-05	2.78266e-06	7.32746e-06	4.00355e-06	7.83845e-07	7.31402e-06
1180	2.15617e-05	2.78266e-06	7.32746e-06	4.00355e-06	7.83845e-07	7.29184e-06
1181	2.15617e-05	2.78266e-06	7.32746e-06	4.00355e-06	7.83845e-07	7.29184e-06
1182	1.57972e-05	2.39438e-06	6.09863e-06	3.78113e-06	7.83845e-07	5.77104e-06
1183	1.65177e-05	2.45909e-06	6.41721e-06	3.92941e-06	0	5.86468e-06
1184	1.65177e-05	2.45909e-06	6.32619e-06	3.92941e-06	0	5.84648e-06
1185	1.65177e-05	2.45909e-06	6.32619e-06	3.92941e-06	0	5.84648e-06
1186	1.41897e-05	1.68254e-06	5.32492e-06	3.41044e-06	0	4.92152e-06
1187	1.46886e-05	1.68254e-06	5.46146e-06	3.55872e-06	0	5.07826e-06
1188	1.46886e-05	1.68254e-06	5.46146e-06	3.55872e-06	0	5.07826e-06
1189	1.46886e-05	1.68254e-06	5.46146e-06	3.48458e-06	0	5.06344e-06
1190	1.4744e-05	1.68254e-06	5.50697e-06	3.48458e-06	0	5.08362e-06
1191	1.37463e-05	1.16483e-06	4.96082e-06	3.3363e-06	0	4.64165e-06
1192	1.36909e-05	1.16483e-06	4.96082e-06	3.3363e-06	0	4.63057e-06
1193	1.34692e-05	1.16483e-06	4.8698e-06	3.26216e-06	0	4.5532e-06
1194	1.34692e-05	1.16483e-06	4.91531e-06	3.26216e-06	0	4.5623e-06
1195	1.11966e-05	8.41269e-07	3.09483e-06	2.37248e-06	0	3.50104e-06
1196	1.0864e-05	8.41269e-07	2.82175e-06	2.29834e-06	0	3.36507e-06
1197	1.07532e-05	8.41269e-07	2.82175e-06	2.2242e-06	0	3.32808e-06
1198	2.66058e-06	2.58852e-07	7.73707e-07	6.67259e-07	0	8.7208e-07
1199	3.15943e-06	3.23565e-07	8.19219e-07	8.15539e-07	0	1.02355e-06
1200	2.38343e-06	2.58852e-07	7.28194e-07	6.67259e-07	0	8.07547e-07
1201	3.54743e-06	6.4713e-07	1.09229e-06	8.15539e-07	0	1.22048e-06
1202	4.10172e-06	8.41269e-07	1.41088e-06	9.63819e-07	0	1.46354e-06
1203	1.06423e-05	2.45909e-06	5.18839e-06	2.29834e-06	0	4.11762e-06
1204	1.11412e-05	2.52381e-06	5.37043e-06	2.37248e-06	0	4.28158e-06
1205	1.11966e-05	2.52381e-06	5.37043e-06	2.37248e-06	0	4.29266e-06
1206	1.17509e-05	2.58852e-06	5.68902e-06	2.44662e-06	0	4.49501e-06
1207	1.19172e-05	2.91209e-06	5.82556e-06	2.52076e-06	0	4.63512e-06
1208	1.49103e-05	4.01221e-06	7.23643e-06	3.18802e-06	0	5.86939e-06
1209	1.51875e-05	4.07692e-06	7.46399e-06	3.18802e-06	0	5.98329e-06
1210	1.552e-05	4.14163e-06	7.69155e-06	3.41044e-06	0	6.15272e-06
1211	1.57972e-05	4.14163e-06	7.73707e-06	3.3363e-06	0	6.20244e-06
1212	1.746e-05	4.27106e-06	8.37424e-06	3.3363e-06	7.83845e-07	6.84509e-06
1213	1.746e-05	4.27106e-06	8.37424e-06	3.3363e-06	7.83845e-07	6.84509e-06
1214	1.70166e-05	4.27106e-06	8.14667e-06	3.3363e-06	7.83845e-07	6.7109e-06
1215	1.69612e-05	4.27106e-06	8.10116e-06	3.26216e-06	7.83845e-07	6.67589e-06
1216	1.69057e-05	4.27106e-06	8.05565e-06	3.26216e-06	7.83845e-07	6.65568e-06
1217	1.76263e-05	4.33577e-06	8.46526e-06	3.41044e-06	7.83845e-07	6.92432e-06
1218	1.76263e-05	4.33577e-06	8.51077e-06	3.41044e-06	7.83845e-07	6.93343e-06
1219	1.74046e-05	4.27106e-06	8.46526e-06	3.26216e-06	7.83845e-07	6.83739e-06
1220	2.79915e-05	8.80097e-06	2.03439e-05	6.15361e-06	1.56769e-06	1.29715e-05
1221	2.81578e-05	8.80097e-06	2.0435e-05	6.22775e-06	1.56769e-06	1.30378e-05
1222	2.80469e-05	8.73626e-06	2.02984e-05	6.15361e-06	1.56769e-06	1.29606e-05
1223	2.81578e-05	8.73626e-06	2.04805e-05	6.22775e-06	1.56769e-06	1.3034e-05
1224	2.79915e-05	8.60683e-06	2.02074e-05	6.22775e-06	1.56769e-06	1.29202e-05
1225	2.79915e-05	8.60683e-06	2.02074e-05	6.22775e-06	1.56769e-06	1.29202e-05
1226	2.79915e-05	8.60683e-06	2.02074e-05	6.22775e-06	1.56769e-06	1.29202e-05
1227	2.7936e-05	8.60683e-06	2.02074e-05	6.22775e-06	1.56769e-06	1.29091e-05
1228	2.21715e-05	5.9536e-06	1.63389e-05	4.59667e-06	1.56769e-06	1.01257e-05
1229	2.04532e-05	5.69474e-06	1.58382e-05	4.15183e-06	1.56769e-06	9.54113e-06
1230	1.62406e-05	5.04761e-06	1.45639e-05	3.63286e-06	1.56769e-06	8.21053e-06
1231	1.66286e-05	5.17704e-06	1.4928e-05	3.85527e-06	1.56769e-06	8.43132e-06
1232	1.60743e-05	5.17704e-06	1.47459e-05	3.70699e-06	1.56769e-06	8.25438e-06
1233	4.61166e-05	1.37839e-05	3.3861e-05	1.52728e-05	7.83845e-06	2.33746e-05
1234	4.84446e-05	1.41074e-05	3.56815e-05	1.60884e-05	7.83845e-06	2.44321e-05
1235	5.15487e-05	1.4431e-05	3.7593e-05	1.71263e-05	8.62229e-06	2.58643e-05
1236	5.16595e-05	1.45604e-05	3.78206e-05	1.72005e-05	8.62229e-06	2.59727e-05
1237	5.17149e-05	1.45604e-05	3.77751e-05	1.72746e-05	8.62229e-06	2.59895e-05
1238	5.17704e-05	1.45604e-05	3.77751e-05	1.72746e-05	8.62229e-06	2.60006e-05
1239	5.08835e-05	1.36544e-05	3.64097e-05	1.69039e-05	8.62229e-06	2.52948e-05
1240	5.17149e-05	1.37192e-05	3.65463e-05	1.6978e-05	8.62229e-06	2.55161e-05
1241	5.17149e-05	1.3525e-05	3.63642e-05	1.69039e-05	8.62229e-06	2.54261e-05
1242	5.16041e-05	1.34603e-05	3.63642e-05	1.69039e-05	8.62229e-06	2.5391e-05
1243	4.51744e-05	1.13895e-05	2.95374e-05	1.5347e-05	8.62229e-06	2.20141e-05
1244	4.72806e-05	1.17778e-05	3.09027e-05	1.57918e-05	9.40614e-06	2.30318e-05
1245	4.73361e-05	1.17778e-05	3.09938e-05	1.58659e-05	9.40614e-06	2.30759e-05
1246	4.73361e-05	1.17778e-05	3.09938e-05	1.58659e-05	9.40614e-06	2.30759e-05
1247	4.73361e-05	1.17778e-05	3.09938e-05	1.58659e-05	9.40614e-06	2.30759e-05
1248	4.73915e-05	1.17778e-05	3.09938e-05	1.58659e-05	9.40614e-06	2.3087e-05
1249	4.71698e-05	1.13895e-05	3.0038e-05	1.57177e-05	9.40614e-06	2.27442e-05
1250	4.71144e-05	1.13248e-05	2.9947e-05	1.57177e-05	9.40614e-06	2.2702e-05
1251	4.69481e-05	1.11306e-05	2.9856e-05	1.56435e-05	9.40614e-06	2.25969e-05
1252	4.65601e-05	1.08718e-05	2.89002e-05	1.49763e-05	9.40614e-06	2.21429e-05
1253	4.64492e-05	1.08718e-05	2.87637e-05	1.49021e-05	9.40614e-06	2.20786e-05
1254	4.40104e-05	9.31867e-06	2.49862e-05	1.37159e-05	8.62229e-06	2.01307e-05
1255	1.21389e-05	1.03541e-06	3.95956e-06	1.63108e-06	1.56769e-06	4.06653e-06
1256	1.29149e-05	1.16483e-06	4.18712e-06	1.63108e-06	1.56769e-06	4.29312e-06
1257	1.26932e-05	1.10012e-06	4.09609e-06	1.55694e-06	1.56769e-06	4.20281e-06
1258	1.25269e-05	1.10012e-06	4.05058e-06	1.55694e-06	2.35153e-06	4.31721e-06
1259	7.31658e-06	9.05982e-07	3.0038e-06	1.03796e-06	1.56769e-06	2.7664e-06
1260	9.92173e-06	1.22955e-06	3.77751e-06	1.26038e-06	1.56769e-06	3.55137e-06
1261	9.58916e-06	1.22955e-06	3.77751e-06	1.26038e-06	1.56769e-06	3.48486e-06
1262	9.25659e-06	1.22955e-06	3.68648e-06	1.26038e-06	1.56769e-06	3.40014e-06
1263	8.59144e-06	9.70695e-07	3.09483e-06	1.03796e-06	7.83845e-07	2.89575e-06
1264	7.26115e-06	9.05982e-07	2.36663e-06	7.41399e-07	7.83845e-07	2.4118e-06
1265	9.20116e-06	1.22955e-06	2.77624e-06	8.15539e-07	7.83845e-07	2.96127e-06
1266	9.31202e-06	1.22955e-06	2.73073e-06	8.15539e-07	7.83845e-07	2.97434e-06
1267	8.75773e-06	1.22955e-06	2.50317e-06	7.41399e-07	7.83845e-07	2.80314e-06
1268	1.2416e-05	1.74725e-06	4.05058e-06	1.40866e-06	7.83845e-07	4.08127e-06
1269	1.26932e-05	1.74725e-06	4.05058e-06	1.40866e-06	7.83845e-07	4.13671e-06
1270	1.26932e-05	1.74725e-06	4.05058e-06	1.40866e-06	7.83845e-07	4.13671e-06
1271	1.26932e-05	1.74725e-06	4.05058e-06	1.33452e-06	7.83845e-07	4.12188e-06
1272	1.26932e-05	1.74725e-06	4.05058e-06	1.33452e-06	7.83845e-07	4.12188e-06
1273	1.22497e-05	1.74725e-06	3.95956e-06	1.33452e-06	7.83845e-07	4.01498e-06
1274	1.24714e-05	1.81196e-06	4.00507e-06	1.33452e-06	7.83845e-07	4.08136e-06
1275	1.15846e-05	1.61783e-06	3.732e-06	1.18624e-06	7.83845e-07	3.7809e-06
1276	1.2804e-05	1.61783e-06	3.91404e-06	1.18624e-06	7.83845e-07	4.06119e-06
1277	1.26932e-05	1.55311e-06	3.91404e-06	1.18624e-06	7.83845e-07	4.02609e-06
1278	1.67395e-05	2.26496e-06	6.7358e-06	1.63108e-06	7.83845e-07	5.63104e-06
1279	1.67395e-05	2.26496e-06	6.7358e-06	1.63108e-06	7.83845e-07	5.63104e-06
1280	1.66286e-05	2.26496e-06	6.69029e-06	1.63108e-06	7.83845e-07	5.59976e-06
1281	1.65177e-05	2.26496e-06	6.50824e-06	1.63108e-06	7.83845e-07	5.54117e-06
1282	1.65732e-05	2.26496e-06	6.41721e-06	1.55694e-06	7.83845e-07	5.51923e-06
1283	1.49657e-05	1.94139e-06	5.64351e-06	1.40866e-06	7.83845e-07	4.94862e-06
1284	1.53537e-05	2.0061e-06	5.96209e-06	1.40866e-06	0	4.94611e-06
1285	1.49103e-05	1.81196e-06	5.82556e-06	1.33452e-06	0	4.77647e-06
1286	1.3968e-05	1.94139e-06	5.73453e-06	1.33452e-06	0	4.59569e-06
1287	1.9788e-05	1.02247e-05	1.50645e-05	6.07947e-06	3.13538e-06	1.08584e-05
1288	1.9788e-05	1.02894e-05	1.53376e-05	6.07947e-06	3.91922e-06	1.10827e-05
1289	1.68503e-05	9.9658e-06	1.47459e-05	5.70877e-06	3.91922e-06	1.0238e-05
1290	2.16172e-05	1.05482e-05	1.57927e-05	6.30189e-06	5.48691e-06	1.19494e-05
1291	2.15063e-05	1.05482e-05	1.55652e-05	6.30189e-06	5.48691e-06	1.18817e-05
1292	2.12292e-05	1.05482e-05	1.54286e-05	6.15361e-06	5.48691e-06	1.17693e-05
1293	2.20606e-05	1.05482e-05	1.57017e-05	6.37603e-06	5.48691e-06	1.20347e-05
1294	2.18389e-05	1.04835e-05	1.57927e-05	6.30189e-06	5.48691e-06	1.19808e-05
1295	2.21715e-05	1.04835e-05	1.58837e-05	6.37603e-06	5.48691e-06	1.20803e-05
1296	2.22823e-05	1.05482e-05	1.58837e-05	6.30189e-06	5.48691e-06	1.21006e-05
1297	2.23932e-05	1.04835e-05	1.59293e-05	6.30189e-06	5.48691e-06	1.2119e-05
1298	1.81252e-05	9.70695e-06	1.32895e-05	5.93119e-06	5.48691e-06	1.0508e-05
1299	2.02869e-05	1.06776e-05	1.46549e-05	7.33985e-06	7.0546e-06	1.20028e-05
1300	2.0176e-05	1.08071e-05	1.49735e-05	7.85883e-06	7.0546e-06	1.2174e-05
1301	2.91e-05	1.21013e-05	1.85234e-05	1.12693e-05	1.33254e-05	1.68639e-05
1302	2.93218e-05	1.22308e-05	1.8569e-05	1.13434e-05	1.33254e-05	1.69581e-05
1303	2.92663e-05	1.22308e-05	1.86145e-05	1.14175e-05	1.33254e-05	1.69709e-05
1304	2.93218e-05	1.22955e-05	1.86145e-05	1.14175e-05	1.33254e-05	1.69949e-05
1305	2.80469e-05	1.2166e-05	1.81593e-05	1.13434e-05	1.33254e-05	1.66082e-05
1306	5.33224e-05	3.04151e-05	3.98231e-05	4.37425e-05	5.40853e-05	4.42777e-05
1307	5.36549e-05	3.09975e-05	4.03238e-05	4.50771e-05	5.33014e-05	4.46709e-05
1308	5.37104e-05	3.1127e-05	4.03693e-05	4.52253e-05	5.33014e-05	4.47467e-05
1309	5.39321e-05	3.09975e-05	4.01872e-05	4.50029e-05	5.33014e-05	4.46842e-05
1310	5.38767e-05	3.07387e-05	4.00962e-05	4.50029e-05	5.33014e-05	4.46032e-05
1311	5.06064e-05	2.37497e-05	3.39976e-05	4.15925e-05	5.09499e-05	4.01792e-05
1312	4.79458e-05	2.31673e-05	3.27232e-05	4.06287e-05	5.01661e-05	3.89262e-05
1313	5.91424e-05	2.91209e-05	4.51936e-05	4.68564e-05	5.17337e-05	4.64094e-05
1314	5.94195e-05	2.92503e-05	4.52391e-05	4.68564e-05	5.17337e-05	4.64998e-05
1315	5.94195e-05	2.9315e-05	4.52391e-05	4.68564e-05	5.17337e-05	4.65127e-05
1316	5.94195e-05	2.9315e-05	4.52391e-05	4.68564e-05	5.17337e-05	4.65127e-05
1317	5.94195e-05	2.9315e-05	4.52391e-05	4.68564e-05	5.17337e-05	4.65127e-05
1318	5.93087e-05	2.9315e-05	4.52391e-05	4.68564e-05	5.17337e-05	4.64906e-05
1319	5.93087e-05	2.9315e-05	4.51936e-05	4.68564e-05	5.17337e-05	4.64815e-05
1320	5.85327e-05	2.91209e-05	4.46929e-05	4.67081e-05	5.17337e-05	4.61577e-05
1321	5.74795e-05	2.90561e-05	4.41468e-05	4.61892e-05	5.17337e-05	4.57211e-05
1322	5.66481e-05	2.86031e-05	4.28724e-05	4.51512e-05	5.25176e-05	4.51585e-05
1323	5.37658e-05	2.76325e-05	4.09609e-05	4.41874e-05	5.09499e-05	4.34993e-05
1324	5.27127e-05	2.74383e-05	4.04603e-05	4.38167e-05	4.93822e-05	4.2762e-05
1325	4.61166e-05	1.95433e-05	3.30418e-05	3.2325e-05	3.60569e-05	3.34167e-05
1326	5.50961e-05	1.99963e-05	3.53629e-05	3.30664e-05	3.99761e-05	3.66996e-05
1327	5.30452e-05	1.92845e-05	3.3861e-05	2.98042e-05	3.68407e-05	3.45671e-05
1328	5.30452e-05	1.92845e-05	3.38155e-05	2.98042e-05	3.68407e-05	3.4558e-05
1329	5.24355e-05	1.92198e-05	3.30873e-05	2.89887e-05	3.68407e-05	3.41144e-05
1330	5.24909e-05	1.90256e-05	3.28143e-05	2.88404e-05	3.68407e-05	3.40024e-05
1331	4.81675e-05	1.43016e-05	2.73073e-05	2.04626e-05	2.82184e-05	2.76915e-05
1332	2.68829e-05	4.01221e-06	9.78511e-06	5.48635e-06	8.62229e-06	1.09578e-05
1333	2.78806e-05	3.94749e-06	9.69409e-06	5.70877e-06	8.62229e-06	1.11706e-05
1334	2.66612e-05	3.62393e-06	8.46526e-06	5.33807e-06	8.62229e-06	1.05422e-05
1335	2.68829e-05	3.62393e-06	8.41975e-06	5.18979e-06	8.62229e-06	1.05477e-05
1336	2.38343e-05	3.10622e-06	7.05438e-06	4.37425e-06	8.62229e-06	9.39829e-06
1337	2.47212e-05	3.17094e-06	7.5095e-06	4.52253e-06	8.62229e-06	9.70929e-06
1338	2.47766e-05	3.17094e-06	7.41848e-06	4.52253e-06	8.62229e-06	9.70217e-06
1339	2.47212e-05	3.17094e-06	7.41848e-06	4.44839e-06	8.62229e-06	9.67626e-06
1340	2.328e-05	2.78266e-06	6.82682e-06	4.00355e-06	8.62229e-06	9.10306e-06
1341	2.03977e-05	2.39438e-06	6.05312e-06	3.3363e-06	8.62229e-06	8.16076e-06
1342	2.06195e-05	2.39438e-06	6.05312e-06	3.41044e-06	8.62229e-06	8.21995e-06
1343	2.0564e-05	2.39438e-06	6.05312e-06	3.41044e-06	8.62229e-06	8.20885e-06
1344	2.03423e-05	2.39438e-06	5.87107e-06	3.41044e-06	8.62229e-06	8.1281e-06
1345	1.61852e-05	1.74725e-06	4.00507e-06	2.66904e-06	7.0546e-06	6.33223e-06
1346	1.49103e-05	1.4884e-06	3.77751e-06	2.29834e-06	7.0546e-06	5.90583e-06
1347	7.5383e-06	8.41269e-07	1.91151e-06	8.15539e-07	5.48691e-06	3.31871e-06
1348	8.36973e-06	1.03541e-06	2.32112e-06	8.15539e-07	4.70307e-06	3.44897e-06
1349	8.92401e-06	1.22955e-06	2.95829e-06	8.89679e-07	2.35153e-06	3.27061e-06
1350	1.73492e-05	2.20024e-06	6.78131e-06	1.63108e-06	3.13538e-06	6.21944e-06
1351	1.79589e-05	2.32967e-06	7.23643e-06	1.63108e-06	3.13538e-06	6.45829e-06
1352	1.84023e-05	2.32967e-06	7.55502e-06	1.8535e-06	3.13538e-06	6.65517e-06
1353	1.81252e-05	2.39438e-06	7.55502e-06	1.8535e-06	3.13538e-06	6.6127e-06
1354	1.76817e-05	2.39438e-06	7.28194e-06	1.77936e-06	3.13538e-06	6.45455e-06
1355	1.69057e-05	2.26496e-06	7.41848e-06	1.8535e-06	1.56769e-06	6.00207e-06
1356	1.79589e-05	2.52381e-06	8.69282e-06	2.00178e-06	1.56769e-06	6.549e-06
1357	1.71829e-05	2.52381e-06	8.82936e-06	1.92764e-06	1.56769e-06	6.40628e-06
1358	2.95989e-05	4.07692e-06	1.46094e-05	2.81732e-06	1.56769e-06	1.0534e-05
1359	3.03195e-05	4.27106e-06	1.48825e-05	2.81732e-06	1.56769e-06	1.07716e-05
1360	3.03195e-05	4.27106e-06	1.48825e-05	2.74318e-06	1.56769e-06	1.07568e-05
1361	3.04303e-05	4.27106e-06	1.4928e-05	2.74318e-06	1.56769e-06	1.0788e-05
1362	3.04303e-05	4.20635e-06	1.4928e-05	2.74318e-06	1.56769e-06	1.07751e-05
1363	3.02086e-05	4.14163e-06	1.48825e-05	2.74318e-06	1.56769e-06	1.07087e-05
1364	3.0264e-05	4.14163e-06	1.4928e-05	2.74318e-06	1.56769e-06	1.07289e-05
1365	3.09846e-05	4.14163e-06	1.52011e-05	2.66904e-06	1.56769e-06	1.09128e-05
1366	3.09846e-05	4.14163e-06	1.52011e-05	2.66904e-06	1.56769e-06	1.09128e-05
1367	3.08738e-05	4.14163e-06	1.51555e-05	2.66904e-06	1.56769e-06	1.08815e-05
1368	2.82132e-05	3.55922e-06	1.40177e-05	2.37248e-06	7.83845e-07	9.78929e-06
1369	4.47309e-05	4.27106e-06	1.99343e-05	3.70699e-06	7.83845e-07	1.46854e-05
1370	4.55624e-05	4.33577e-06	2.01619e-05	3.70699e-06	7.83845e-07	1.49102e-05
1371	4.56732e-05	4.33577e-06	2.01164e-05	3.70699e-06	7.83845e-07	1.49232e-05
1372	4.47864e-05	3.94749e-06	1.95247e-05	3.3363e-06	7.83845e-07	1.44757e-05
1373	4.47864e-05	3.94749e-06	1.92516e-05	3.3363e-06	0	1.42644e-05
1374	4.35115e-05	3.75335e-06	1.84779e-05	2.9656e-06	0	1.37417e-05
1375	3.94652e-05	3.10622e-06	1.59293e-05	2.44662e-06	0	1.21895e-05
1376	4.30681e-05	3.42979e-06	1.66574e-05	2.81732e-06	0	1.31945e-05
1377	4.05184e-05	3.10622e-06	1.54286e-05	2.81732e-06	0	1.23741e-05
1378	7.84316e-05	8.41269e-06	3.52719e-05	1.26038e-05	3.13538e-06	2.75711e-05
1379	7.8875e-05	8.4774e-06	3.60911e-05	1.29745e-05	3.91922e-06	2.80674e-05
1380	7.88196e-05	8.54212e-06	3.60001e-05	1.30486e-05	3.91922e-06	2.80659e-05
1381	7.89304e-05	8.73626e-06	3.60911e-05	1.31228e-05	3.91922e-06	2.816e-05
1382	7.8875e-05	8.73626e-06	3.60456e-05	1.31969e-05	3.91922e-06	2.81546e-05
1383	7.90413e-05	8.67154e-06	3.59091e-05	1.34193e-05	3.91922e-06	2.81921e-05
1384	7.48287e-05	8.54212e-06	3.43162e-05	1.379e-05	4.70307e-06	2.7236e-05
1385	0.000138073	2.12906e-05	7.37297e-05	3.05456e-05	1.33254e-05	5.53929e-05
1386	0.00014672	2.29084e-05	7.97828e-05	3.15836e-05	1.56769e-05	5.93343e-05
1387	0.000147496	2.31025e-05	8.03289e-05	3.18802e-05	1.56769e-05	5.96969e-05
1388	0.000147662	2.32967e-05	8.04655e-05	3.21026e-05	1.56769e-05	5.98407e-05
1389	0.000147607	2.32967e-05	8.02834e-05	3.22509e-05	1.56769e-05	5.9823e-05
1390	0.000147607	2.3232e-05	8.042e-05	3.22509e-05	1.56769e-05	5.98374e-05
1391	0.000147219	2.28437e-05	7.91911e-05	3.22509e-05	1.56769e-05	5.94363e-05
1392	0.000147551	2.30378e-05	7.78713e-05	3.25474e-05	1.56769e-05	5.93369e-05
1393	0.000153039	2.38144e-05	8.18308e-05	3.3363e-05	1.64607e-05	6.17016e-05
1394	0.000153759	2.40732e-05	8.27411e-05	3.36595e-05	1.72446e-05	6.22955e-05
1395	0.00015448	2.4138e-05	8.31962e-05	3.35112e-05	1.72446e-05	6.2514e-05
1396	0.000151265	2.39438e-05	8.15578e-05	3.32147e-05	1.72446e-05	6.14452e-05
1397	0.000154203	2.42027e-05	8.31962e-05	3.30664e-05	1.72446e-05	6.23826e-05
1398	0.000153815	2.40085e-05	8.29686e-05	3.29923e-05	1.64607e-05	6.2049e-05
1399	0.000137907	2.09023e-05	7.33656e-05	2.79507e-05	1.41092e-05	5.4847e-05
1400	0.000176208	2.75677e-05	9.95351e-05	3.24733e-05	1.80284e-05	7.07625e-05
1401	0.000176651	2.75677e-05	0.000100354	3.23991e-05	1.80284e-05	7.1e-05
1402	0.000177593	2.76972e-05	0.000101401	3.2325e-05	1.80284e-05	7.14089e-05
1403	0.000177483	2.78266e-05	0.000101447	3.2325e-05	1.80284e-05	7.1422e-05
1404	0.000177205	2.75677e-05	0.000101128	3.21767e-05	1.72446e-05	7.10644e-05
1405	0.000147385	2.31673e-05	8.30142e-05	2.5949e-05	1.17577e-05	5.82546e-05
1406	0.000170665	3.00268e-05	9.78056e-05	3.21026e-05	1.88123e-05	6.98825e-05
1407	0.000176263	3.35213e-05	0.000103449	3.41044e-05	1.88123e-05	7.323e-05
1408	0.000175709	3.46862e-05	0.000105179	3.4994e-05	1.88123e-05	7.38761e-05
1409	0.000191229	3.66923e-05	0.000114691	3.64768e-05	2.27315e-05	8.03641e-05
1410	0.000193224	3.66276e-05	0.000114918	3.54389e-05	2.27315e-05	8.0588e-05
1411	0.000193723	3.5851e-05	0.000116056	3.46975e-05	2.27315e-05	8.06118e-05
1412	0.000196827	3.61099e-05	0.000118423	3.46233e-05	2.27315e-05	8.17429e-05
1413	0.000197215	3.61099e-05	0.000118286	3.45492e-05	2.27315e-05	8.17783e-05
1414	0.000195109	3.5398e-05	0.000115555	3.3363e-05	2.27315e-05	8.04313e-05
1415	0.000190952	3.46862e-05	0.00011287	3.08422e-05	2.19477e-05	7.82596e-05
1416	0.00017582	3.21624e-05	0.00010486	2.8099e-05	2.038e-05	7.22643e-05
1417	0.000193723	3.74041e-05	0.000116648	3.63286e-05	2.5083e-05	8.18373e-05
1418	0.000194167	3.75335e-05	0.00011733	3.62544e-05	2.58669e-05	8.22304e-05
1419	0.000193446	3.75983e-05	0.000116966	3.61061e-05	2.58669e-05	8.19967e-05
1420	0.000193113	3.75335e-05	0.000116511	3.59579e-05	2.58669e-05	8.17965e-05
1421	0.000171496	3.05445e-05	9.83518e-05	3.17319e-05	2.42992e-05	7.12847e-05
1422	0.000179035	3.43626e-05	0.000106999	3.71441e-05	2.74346e-05	7.69951e-05
1423	0.000169501	3.30683e-05	0.000104086	3.47716e-05	2.74346e-05	7.37723e-05
1424	0.000169612	3.29389e-05	0.000104177	3.47716e-05	2.74346e-05	7.37868e-05
1425	0.000169335	3.24859e-05	0.000103449	3.43268e-05	2.74346e-05	7.34063e-05
1426	0.000169168	3.22271e-05	0.000102948	3.42526e-05	2.74346e-05	7.32061e-05
1427	0.000157916	2.0514e-05	8.08751e-05	2.89146e-05	2.35153e-05	6.2347e-05
1428	0.000150766	2.01905e-05	7.80533e-05	2.83214e-05	2.35153e-05	6.01693e-05
1429	0.000111134	1.72784e-05	6.33529e-05	2.35023e-05	1.72446e-05	4.65024e-05
1430	0.000113185	1.76019e-05	6.41266e-05	2.40213e-05	1.72446e-05	4.72359e-05
1431	0.000112465	1.76019e-05	6.39446e-05	2.40213e-05	1.72446e-05	4.70555e-05
1432	0.000112132	1.76019e-05	6.35805e-05	2.40213e-05	1.72446e-05	4.69161e-05
1433	0.000107254	1.65018e-05	5.91203e-05	2.31316e-05	1.72446e-05	4.46505e-05
1434	8.91293e-05	1.48193e-05	4.71961e-05	2.15006e-05	1.56769e-05	3.76644e-05
1435	8.65796e-05	1.46899e-05	4.63314e-05	2.15747e-05	1.4893e-05	3.68137e-05
1436	6.1803e-05	1.11306e-05	3.28143e-05	1.72005e-05	1.25415e-05	2.7098e-05
1437	6.28007e-05	1.11953e-05	3.28598e-05	1.61625e-05	9.40614e-06	2.64849e-05
1438	6.28007e-05	1.11953e-05	3.27687e-05	1.61625e-05	9.40614e-06	2.64667e-05
1439	6.22464e-05	1.10659e-05	3.24502e-05	1.60884e-05	9.40614e-06	2.62514e-05
1440	6.20247e-05	1.10659e-05	3.23136e-05	1.58659e-05	9.40614e-06	2.61352e-05
1441	5.27127e-05	7.70085e-06	2.40304e-05	1.18624e-05	8.62229e-06	2.09857e-05
1442	1.22497e-05	1.42369e-06	4.36917e-06	2.15006e-06	1.56769e-06	4.35206e-06
1443	2.00652e-05	2.91209e-06	9.28448e-06	5.26393e-06	4.70307e-06	8.44575e-06
1444	1.98989e-05	3.36508e-06	9.55755e-06	5.33807e-06	4.70307e-06	8.57253e-06
1445	2.12292e-05	4.59462e-06	1.11505e-05	6.52431e-06	4.70307e-06	9.64034e-06
1446	2.18943e-05	4.78876e-06	1.21062e-05	6.89501e-06	6.27076e-06	1.0391e-05
1447	2.0952e-05	5.11233e-06	1.21973e-05	7.11743e-06	7.0546e-06	1.04867e-05
1448	5.26572e-05	1.43016e-05	3.00835e-05	1.80901e-05	2.038e-05	2.71025e-05
1449	5.47635e-05	1.46251e-05	3.12668e-05	1.84608e-05	2.19477e-05	2.82128e-05
1450	5.49298e-05	1.46251e-05	3.12213e-05	1.83867e-05	2.19477e-05	2.82221e-05
1451	5.50407e-05	1.46899e-05	3.12213e-05	1.83867e-05	2.19477e-05	2.82573e-05
1452	5.49298e-05	1.46899e-05	3.11303e-05	1.83867e-05	2.19477e-05	2.82169e-05
1453	5.43201e-05	1.44957e-05	3.09938e-05	1.81643e-05	2.27315e-05	2.81411e-05
1454	9.44504e-05	3.04798e-05	5.85286e-05	4.16666e-05	5.01661e-05	5.50583e-05
1455	9.73327e-05	3.17094e-05	6.13959e-05	4.30753e-05	5.09499e-05	5.68926e-05
1456	0.000105425	3.70158e-05	6.88144e-05	5.13048e-05	5.48691e-05	6.34858e-05
1457	0.00011834	4.63345e-05	8.10571e-05	6.53173e-05	6.74106e-05	7.56919e-05
1458	0.000120225	4.69169e-05	8.22405e-05	6.60587e-05	6.81945e-05	7.67271e-05
1459	0.000120779	4.72405e-05	8.2559e-05	6.64293e-05	6.81945e-05	7.70405e-05
1460	0.000121167	4.73052e-05	8.27411e-05	6.64293e-05	6.81945e-05	7.71674e-05
1461	0.00012089	4.73052e-05	8.26501e-05	6.63552e-05	6.81945e-05	7.7079e-05
1462	0.000121001	4.73699e-05	8.31052e-05	6.64293e-05	6.81945e-05	7.722e-05
1463	0.00013896	6.03772e-05	9.98537e-05	8.62988e-05	7.83845e-05	9.27748e-05
1464	0.000139237	6.05714e-05	0.000100172	8.65213e-05	7.83845e-05	9.29772e-05
1465	0.000139292	6.05714e-05	9.99447e-05	8.62988e-05	7.99522e-05	9.32118e-05
1466	0.000139348	6.05714e-05	9.99902e-05	8.62988e-05	7.99522e-05	9.32321e-05
1467	0.00013896	6.04419e-05	9.95351e-05	8.5854e-05	7.99522e-05	9.29486e-05
1468	0.000129703	5.56532e-05	9.05237e-05	7.97745e-05	7.60329e-05	8.63375e-05
1469	0.000133472	5.59767e-05	9.17525e-05	7.98487e-05	7.60329e-05	8.74166e-05
1470	0.000133361	5.55238e-05	9.1707e-05	7.99228e-05	7.60329e-05	8.73095e-05
1471	0.000123107	5.27411e-05	8.52898e-05	7.629e-05	6.97622e-05	8.1438e-05
1472	0.00013059	5.44236e-05	8.89307e-05	7.844e-05	7.36814e-05	8.52131e-05
1473	0.000127264	5.11233e-05	8.35603e-05	7.43623e-05	6.97622e-05	8.12144e-05
1474	0.000115513	4.80818e-05	7.4913e-05	6.96915e-05	6.5843e-05	7.48085e-05
1475	0.00015132	7.35787e-05	0.000102311	9.46767e-05	7.36814e-05	9.91136e-05
1476	0.000152429	7.38375e-05	0.000103404	9.52698e-05	7.36814e-05	9.97243e-05
1477	0.000151431	7.46141e-05	0.000102539	9.35646e-05	7.21137e-05	9.88525e-05
1478	0.000151764	7.49377e-05	0.00010304	9.36387e-05	7.13299e-05	9.89421e-05
1479	0.000151597	7.442e-05	0.000102539	9.26749e-05	7.0546e-05	9.83554e-05
1480	0.00015193	7.48082e-05	0.000102539	9.26007e-05	7.0546e-05	9.84848e-05
1481	0.00015193	7.42258e-05	0.000102175	9.18593e-05	7.0546e-05	9.81472e-05
1482	0.000151819	7.34493e-05	0.000101674	9.11921e-05	7.0546e-05	9.77361e-05
1483	0.000126765	4.96996e-05	7.26829e-05	6.13878e-05	4.15438e-05	7.04158e-05
1484	0.000141509	6.19303e-05	8.65186e-05	7.38433e-05	4.70307e-05	8.21664e-05
1485	0.000145168	6.73015e-05	9.16615e-05	7.92556e-05	5.01661e-05	8.67105e-05
1486	0.000134858	6.44542e-05	8.43795e-05	7.13226e-05	4.38953e-05	7.97819e-05
1487	0.000143449	7.00842e-05	9.27538e-05	7.71055e-05	4.38953e-05	8.54576e-05
1488	0.000144225	7.08607e-05	9.33454e-05	7.71055e-05	4.46791e-05	8.60431e-05
1489	0.000117342	6.40012e-05	7.94642e-05	6.5688e-05	3.29215e-05	7.18834e-05
1490	0.000133639	7.65555e-05	9.5348e-05	7.40658e-05	3.76245e-05	8.34466e-05
1491	0.000133805	7.66849e-05	9.54845e-05	7.44365e-05	3.68407e-05	8.34503e-05
1492	0.000112686	7.43552e-05	8.95679e-05	7.2064e-05	2.90023e-05	7.55351e-05
1493	0.000148826	0.000102376	0.000120835	0.000101942	3.91922e-05	0.000102634
1494	0.000152595	0.000105029	0.00012393	0.000104908	3.99761e-05	0.000105288
1495	0.000157972	0.000110595	0.000130893	0.000108244	4.07599e-05	0.000109693
1496	0.000158526	0.000111759	0.000131257	0.000108096	3.99761e-05	0.000109923
1497	0.000156364	0.000112212	0.000130347	0.000108467	3.91922e-05	0.000109316
1498	0.000175265	0.000140104	0.000151874	0.0001293	4.46791e-05	0.000128244
1499	0.00017582	0.000140815	0.000152511	0.000129522	4.46791e-05	0.000128669
1500	0.000176041	0.000141139	0.00015283	0.000129522	4.46791e-05	0.000128842
1501	0.000175764	0.000140686	0.000152329	0.000128855	4.46791e-05	0.000128463
1502	0.000175764	0.000140686	0.000152375	0.000128707	4.46791e-05	0.000128442
1503	0.000175709	0.000140492	0.000151965	0.000128336	4.46791e-05	0.000128236
1504	0.000169833	0.00013415	0.000144456	0.000122553	4.38953e-05	0.000122977
1505	0.000171275	0.000135444	0.000146048	0.000123072	4.38953e-05	0.000123947
1506	0.000171496	0.000135703	0.000146276	0.000122998	4.38953e-05	0.000124074
1507	0.000171496	0.000135638	0.000146231	0.000123072	4.38953e-05	0.000124066
1508	0.000170942	0.000135315	0.00014573	0.000122924	4.38953e-05	0.000123761
1509	0.000170887	0.000135315	0.000145593	0.000122924	4.38953e-05	0.000123723
1510	0.000170887	0.000135056	0.000145411	0.00012285	4.38953e-05	0.00012362
1511	0.000170887	0.000134927	0.000145184	0.000122553	4.38953e-05	0.000123489
1512	0.000166009	0.000126837	0.000136354	0.000116251	4.31115e-05	0.000117713
1513	0.000160632	0.000123149	0.000129619	0.000111803	4.15438e-05	0.000113349
1514	0.000152207	0.000115383	0.000121882	0.000102387	3.5273e-05	0.000105426
1515	0.000152651	0.000115124	0.000121745	0.000102017	3.5273e-05	0.000105362
1516	0.000151653	0.000113571	0.000120835	9.97923e-05	3.44892e-05	0.000104068
1517	0.000119781	7.2155e-05	8.46526e-05	6.50948e-05	2.35153e-05	7.30397e-05
1518	7.4219e-05	3.83748e-05	4.84249e-05	3.46233e-05	1.4893e-05	4.2107e-05
1519	7.52721e-05	3.85042e-05	4.91531e-05	3.41044e-05	1.41092e-05	4.22286e-05
1520	5.03292e-05	2.43321e-05	3.12213e-05	2.18713e-05	8.62229e-06	2.72752e-05
1521	7.86533e-05	2.6597e-05	4.93352e-05	2.29092e-05	1.019e-05	3.75369e-05
1522	7.90967e-05	2.56263e-05	4.97448e-05	2.10557e-05	8.62229e-06	3.68292e-05
1523	7.84316e-05	2.3685e-05	4.84704e-05	1.99436e-05	7.83845e-06	3.56738e-05
1524	7.76001e-05	2.29731e-05	4.76057e-05	1.95729e-05	7.0546e-06	3.49613e-05
1525	6.1027e-05	1.13248e-05	3.44072e-05	1.17882e-05	4.70307e-06	2.46501e-05
1526	9.70002e-05	2.12906e-05	5.55703e-05	2.15006e-05	6.27076e-06	4.03265e-05
1527	9.88293e-05	2.19377e-05	5.67081e-05	2.18713e-05	6.27076e-06	4.11234e-05
1528	9.9051e-05	2.20024e-05	5.65716e-05	2.16489e-05	6.27076e-06	4.11089e-05
1529	0.000100049	2.2326e-05	5.74363e-05	2.20196e-05	6.27076e-06	4.16203e-05
1530	0.000100437	2.24554e-05	5.74363e-05	2.20937e-05	6.27076e-06	4.17386e-05
1531	0.000101268	2.21318e-05	5.76184e-05	2.19454e-05	7.0546e-06	4.20036e-05
1532	0.000103707	2.31025e-05	6.01671e-05	2.30575e-05	7.0546e-06	4.34177e-05
1533	0.000104372	2.34261e-05	6.13959e-05	2.32799e-05	7.0546e-06	4.39057e-05
1534	0.000104594	2.34261e-05	6.16235e-05	2.32058e-05	7.0546e-06	4.39808e-05
1535	0.000105093	2.34261e-05	6.20331e-05	2.32058e-05	7.0546e-06	4.41625e-05
1536	0.000105204	2.34908e-05	6.20786e-05	2.32058e-05	7.0546e-06	4.42068e-05
1537	0.000105093	2.33614e-05	6.176e-05	2.29092e-05	7.0546e-06	4.40356e-05
1538	0.000104705	2.31025e-05	6.09863e-05	2.26127e-05	7.0546e-06	4.36922e-05
1539	0.000104871	2.31025e-05	6.10318e-05	2.25385e-05	7.0546e-06	4.37197e-05
1540	0.000103042	2.22613e-05	5.85286e-05	2.13523e-05	6.27076e-06	4.2291e-05
1541	0.000103042	2.22613e-05	5.84831e-05	2.12782e-05	6.27076e-06	4.22671e-05
1542	0.000100658	2.18083e-05	5.64351e-05	2.06109e-05	5.48691e-06	4.09998e-05
1543	6.09161e-05	1.35897e-05	3.23591e-05	1.30486e-05	2.35153e-06	2.4453e-05
1544	6.79001e-05	1.37839e-05	3.40886e-05	1.31228e-05	3.13538e-06	2.64062e-05
1545	6.92858e-05	1.38486e-05	3.44982e-05	1.30486e-05	3.13538e-06	2.67633e-05
1546	6.67915e-05	1.3072e-05	3.25412e-05	1.20848e-05	3.13538e-06	2.5525e-05
1547	6.79001e-05	1.3072e-05	3.28598e-05	1.20107e-05	3.13538e-06	2.57956e-05
1548	6.82327e-05	1.3072e-05	3.29053e-05	1.20107e-05	3.13538e-06	2.58712e-05
1549	6.80664e-05	1.3072e-05	3.28598e-05	1.19365e-05	3.13538e-06	2.5814e-05
1550	6.60155e-05	1.22308e-05	3.12668e-05	1.1121e-05	3.13538e-06	2.47539e-05
1551	6.05281e-05	1.05482e-05	2.799e-05	9.11921e-06	2.35153e-06	2.21074e-05
1552	5.96967e-05	1.04188e-05	2.74893e-05	8.00711e-06	2.35153e-06	2.15927e-05
1553	5.96967e-05	1.04188e-05	2.74438e-05	8.00711e-06	2.35153e-06	2.15836e-05
1554	5.79784e-05	1.02894e-05	2.6306e-05	7.56227e-06	2.35153e-06	2.08975e-05
1555	1.93446e-05	7.11843e-07	4.77878e-06	5.93119e-07	7.83845e-07	5.24244e-06
1556	2.17835e-05	8.41269e-07	5.68902e-06	7.41399e-07	7.83845e-07	5.96781e-06
1557	2.1728e-05	8.41269e-07	5.64351e-06	6.67259e-07	7.83845e-07	5.93278e-06
1558	1.94555e-05	7.76556e-07	4.77878e-06	3.70699e-07	7.83845e-07	5.23308e-06
1559	2.31692e-05	1.22955e-06	6.7358e-06	7.41399e-07	7.83845e-07	6.53196e-06
1560	2.31692e-05	1.22955e-06	6.82682e-06	7.41399e-07	7.83845e-07	6.55016e-06
1561	2.31692e-05	1.22955e-06	6.82682e-06	7.41399e-07	7.83845e-07	6.55016e-06
1562	2.2504e-05	1.22955e-06	6.78131e-06	6.67259e-07	7.83845e-07	6.39319e-06
1563	2.19497e-05	1.22955e-06	6.64477e-06	6.67259e-07	7.83845e-07	6.25502e-06
1564	2.06749e-05	1.22955e-06	6.14414e-06	5.18979e-07	7.83845e-07	5.87028e-06
1565	2.21715e-05	1.29426e-06	6.32619e-06	5.93119e-07	7.83845e-07	6.23378e-06
1566	2.20606e-05	1.29426e-06	6.28068e-06	5.93119e-07	7.83845e-07	6.2025e-06
1567	2.10075e-05	1.22955e-06	6.0076e-06	5.93119e-07	7.83845e-07	5.92432e-06
1568	1.68503e-05	9.70695e-07	5.37043e-06	5.93119e-07	7.83845e-07	4.91368e-06
1569	1.74046e-05	9.70695e-07	5.37043e-06	5.93119e-07	0	4.86777e-06
1570	1.61852e-05	9.70695e-07	5.00634e-06	5.93119e-07	0	4.55107e-06
1571	1.24714e-05	9.05982e-07	4.09609e-06	5.93119e-07	0	3.61332e-06
1572	1.33029e-05	1.03541e-06	4.27814e-06	8.15539e-07	0	3.8864e-06
1573	1.2028e-05	9.70695e-07	3.732e-06	8.15539e-07	0	3.50925e-06
1574	1.97326e-05	1.4884e-06	5.64351e-06	1.40866e-06	1.56769e-06	5.96817e-06
1575	2.08966e-05	1.55311e-06	5.87107e-06	1.33452e-06	1.56769e-06	6.2446e-06
1576	2.02315e-05	1.61783e-06	5.68902e-06	1.33452e-06	1.56769e-06	6.08811e-06
1577	2.27812e-05	1.68254e-06	6.78131e-06	1.55694e-06	2.35153e-06	7.0307e-06
1578	2.28366e-05	1.68254e-06	6.96336e-06	1.63108e-06	2.35153e-06	7.09302e-06
1579	2.10629e-05	1.35897e-06	5.41595e-06	1.26038e-06	2.35153e-06	6.28995e-06
1580	2.57743e-05	1.61783e-06	6.87233e-06	1.92764e-06	2.35153e-06	7.70873e-06
1581	2.54972e-05	1.61783e-06	6.59926e-06	1.92764e-06	2.35153e-06	7.59869e-06
1582	4.43984e-05	4.91819e-06	1.6703e-05	8.74851e-06	8.62229e-06	1.66781e-05
1583	4.53406e-05	4.9829e-06	1.72036e-05	8.82265e-06	8.62229e-06	1.69944e-05
1584	4.58395e-05	5.11233e-06	1.79318e-05	8.89679e-06	8.62229e-06	1.72805e-05
1585	4.59504e-05	5.11233e-06	1.79318e-05	8.89679e-06	8.62229e-06	1.73027e-05
1586	4.58949e-05	5.11233e-06	1.79318e-05	8.97093e-06	8.62229e-06	1.73065e-05
1587	4.59504e-05	5.11233e-06	1.79318e-05	8.97093e-06	8.62229e-06	1.73176e-05
1588	4.59504e-05	5.11233e-06	1.78863e-05	8.97093e-06	8.62229e-06	1.73085e-05
1589	4.31235e-05	5.04761e-06	1.75677e-05	8.97093e-06	8.62229e-06	1.66664e-05
1590	6.30224e-05	1.3978e-05	3.67738e-05	1.95729e-05	1.25415e-05	2.91777e-05
1591	7.01173e-05	1.82491e-05	4.58307e-05	2.50593e-05	1.4893e-05	3.48299e-05
1592	7.18355e-05	1.93492e-05	4.8516e-05	2.63197e-05	1.4893e-05	3.61827e-05
1593	7.31104e-05	1.99963e-05	5.0564e-05	2.72835e-05	1.4893e-05	3.71694e-05
1594	7.39418e-05	2.05787e-05	5.21569e-05	2.80249e-05	1.4893e-05	3.79191e-05
1595	7.24453e-05	2.0514e-05	5.22479e-05	2.83214e-05	1.4893e-05	3.76843e-05
1596	9.66122e-05	2.8862e-05	7.25919e-05	3.85527e-05	1.95961e-05	5.1243e-05
1597	9.70002e-05	2.89914e-05	7.29105e-05	3.8701e-05	1.95961e-05	5.14398e-05
1598	9.70002e-05	2.89914e-05	7.2956e-05	3.86269e-05	1.95961e-05	5.14341e-05
1599	9.72219e-05	2.89914e-05	7.3047e-05	3.86269e-05	1.95961e-05	5.14967e-05
1600	9.72219e-05	2.90561e-05	7.3229e-05	3.8701e-05	1.95961e-05	5.15608e-05
1601	9.38962e-05	2.86031e-05	7.18637e-05	3.78855e-05	1.88123e-05	5.02122e-05
1602	8.99053e-05	2.83443e-05	7.09534e-05	3.76631e-05	1.88123e-05	4.91357e-05
1603	0.000111744	4.1481e-05	9.51659e-05	5.85705e-05	2.66507e-05	6.67224e-05
1604	0.000111744	4.18693e-05	9.63947e-05	5.89412e-05	2.66507e-05	6.712e-05
1605	0.000111966	4.18693e-05	9.64858e-05	5.89412e-05	2.66507e-05	6.71826e-05
1606	0.000112077	4.1934e-05	9.64402e-05	5.89412e-05	2.66507e-05	6.72086e-05
1607	0.000112077	4.1934e-05	9.64858e-05	5.90895e-05	2.66507e-05	6.72474e-05
1608	0.000110469	4.17399e-05	9.59396e-05	5.84964e-05	2.66507e-05	6.66591e-05
1609	0.000110469	4.17399e-05	9.58941e-05	5.84964e-05	2.66507e-05	6.665e-05
1610	0.000109915	4.14163e-05	9.51659e-05	5.81257e-05	2.66507e-05	6.62547e-05
1611	0.00010997	4.12869e-05	9.48473e-05	5.79033e-05	2.66507e-05	6.61316e-05
1612	0.000102931	3.54627e-05	8.36058e-05	5.10083e-05	1.95961e-05	5.85208e-05
1613	8.95727e-05	2.92503e-05	6.81772e-05	4.42615e-05	1.72446e-05	4.97013e-05
1614	8.9739e-05	2.92503e-05	6.82227e-05	4.44839e-05	1.72446e-05	4.97881e-05
1615	8.45841e-05	2.66618e-05	6.26247e-05	4.18149e-05	1.4893e-05	4.61157e-05
1616	5.54287e-05	1.96728e-05	4.56032e-05	3.21767e-05	1.09738e-05	3.2771e-05
1617	8.03161e-05	2.25848e-05	5.30672e-05	3.73665e-05	1.09738e-05	4.08617e-05
1618	8.17018e-05	2.28437e-05	5.36588e-05	3.77372e-05	1.09738e-05	4.13831e-05
1619	8.20344e-05	2.2779e-05	5.38864e-05	3.78113e-05	1.09738e-05	4.1497e-05
1620	7.95401e-05	2.11612e-05	5.07005e-05	3.47716e-05	1.019e-05	3.92727e-05
1621	8.33647e-05	2.18083e-05	5.2521e-05	3.6032e-05	1.09738e-05	4.094e-05
1622	8.28104e-05	2.10964e-05	5.13832e-05	3.37337e-05	1.09738e-05	3.99995e-05
1623	8.14801e-05	1.98669e-05	4.91076e-05	3.12129e-05	1.019e-05	3.83715e-05
1624	7.71567e-05	1.66312e-05	4.21898e-05	2.51334e-05	7.0546e-06	3.36331e-05
1625	5.77567e-05	8.73626e-06	2.50317e-05	1.60884e-05	3.91922e-06	2.23065e-05
1626	7.95401e-05	1.81196e-05	4.35551e-05	2.90628e-05	9.40614e-06	3.59367e-05
1627	8.73556e-05	2.21318e-05	5.21114e-05	3.52906e-05	1.33254e-05	4.2043e-05
1628	8.69121e-05	2.20671e-05	5.14742e-05	3.57354e-05	1.33254e-05	4.19028e-05
1629	8.55819e-05	2.18083e-05	5.03819e-05	3.6032e-05	1.33254e-05	4.14259e-05
1630	8.75219e-05	2.3232e-05	5.21114e-05	3.62544e-05	1.33254e-05	4.2489e-05
1631	8.6247e-05	2.31673e-05	5.13832e-05	3.59579e-05	1.33254e-05	4.20162e-05
1632	8.70784e-05	2.36202e-05	5.25665e-05	3.61803e-05	1.33254e-05	4.25542e-05
1633	8.69121e-05	2.36202e-05	5.24755e-05	3.61803e-05	1.33254e-05	4.25027e-05
1634	8.13693e-05	2.23907e-05	4.93352e-05	3.38819e-05	1.33254e-05	4.00605e-05
1635	8.73001e-05	2.76325e-05	5.67992e-05	3.63286e-05	1.41092e-05	4.44339e-05
1636	8.70784e-05	2.77619e-05	5.69357e-05	3.61803e-05	1.41092e-05	4.44131e-05
1637	8.70784e-05	2.77619e-05	5.69812e-05	3.62544e-05	1.41092e-05	4.4437e-05
1638	8.69676e-05	2.77619e-05	5.69812e-05	3.61803e-05	1.41092e-05	4.44e-05
1639	8.68013e-05	2.76972e-05	5.68902e-05	3.61061e-05	1.41092e-05	4.43208e-05
1640	8.66904e-05	2.76972e-05	5.66626e-05	3.58837e-05	1.41092e-05	4.42086e-05
1641	8.59699e-05	2.76972e-05	5.63896e-05	3.55872e-05	1.41092e-05	4.39506e-05
1642	8.57481e-05	2.76325e-05	5.6344e-05	3.5513e-05	1.41092e-05	4.38694e-05
1643	8.53047e-05	2.7503e-05	5.60255e-05	3.52906e-05	1.41092e-05	4.36466e-05
1644	6.97293e-05	2.39438e-05	4.82884e-05	2.87663e-05	1.17577e-05	3.64971e-05
1645	6.92304e-05	2.39438e-05	4.81519e-05	2.84697e-05	1.17577e-05	3.63107e-05
1646	3.46983e-05	1.68254e-05	2.97194e-05	1.57177e-05	2.35153e-06	1.98625e-05
1647	4.18486e-05	1.88962e-05	3.31784e-05	1.67556e-05	3.13538e-06	2.27628e-05
1648	2.8324e-05	1.4884e-05	2.30747e-05	1.06761e-05	3.13538e-06	1.60188e-05
1649	5.71469e-05	2.26496e-05	3.81847e-05	1.62366e-05	7.0546e-06	2.82545e-05
1650	5.75904e-05	2.26496e-05	3.83212e-05	1.61625e-05	7.0546e-06	2.83557e-05
1651	5.65372e-05	2.13553e-05	3.65918e-05	1.50504e-05	7.0546e-06	2.73179e-05
1652	5.43755e-05	2.11612e-05	3.5545e-05	1.4828e-05	6.27076e-06	2.64361e-05
1653	7.67687e-05	4.71111e-05	5.50697e-05	4.07028e-05	3.5273e-05	5.09851e-05
1654	7.95956e-05	5.00232e-05	5.72088e-05	4.41874e-05	3.91922e-05	5.40414e-05
1655	7.98727e-05	5.01526e-05	5.74363e-05	4.47064e-05	3.91922e-05	5.4272e-05
1656	7.99836e-05	5.0282e-05	5.74818e-05	4.46322e-05	3.91922e-05	5.43144e-05
1657	8.00944e-05	5.03467e-05	5.75274e-05	4.47805e-05	3.91922e-05	5.43882e-05
1658	7.81544e-05	4.82759e-05	5.48421e-05	4.35943e-05	3.91922e-05	5.28118e-05
1659	7.7711e-05	5.1641e-05	5.47511e-05	4.6115e-05	3.99761e-05	5.40388e-05
1660	8.30876e-05	5.9536e-05	6.17145e-05	5.16755e-05	4.46791e-05	6.01385e-05
1661	8.00944e-05	5.85006e-05	5.92113e-05	5.0341e-05	4.5463e-05	5.87221e-05
1662	0.000113795	0.000132468	0.000103631	0.000104167	6.89783e-05	0.000104608
1663	0.000114405	0.000136739	0.000105315	0.000105649	7.0546e-05	0.000106531
1664	0.00011568	0.000140233	0.000106817	0.000106465	7.0546e-05	0.000107948
1665	0.000116012	0.000141268	0.000107272	0.000106613	7.13299e-05	0.000108499
1666	0.000115735	0.00014101	0.000106954	0.000106242	7.13299e-05	0.000108254
1667	0.000115402	0.000141333	0.000106954	0.000106613	7.52491e-05	0.00010911
1668	0.000112243	0.000140363	0.00010304	0.000107058	7.83845e-05	0.000108218
1669	0.00010925	0.000143016	0.000101947	0.000109801	8.30875e-05	0.00010942
1670	9.92173e-05	0.000142757	9.70774e-05	0.000110987	8.46552e-05	0.000106939
1671	0.000200541	0.000328095	0.00023152	0.000334519	0.000471091	0.000313153
1672	0.00020625	0.000337672	0.000242898	0.000347642	0.000488335	0.000324559
1673	0.000212347	0.000355016	0.000255414	0.000368327	0.000504012	0.000339023
1674	0.000216615	0.000365499	0.000263015	0.000381524	0.000521257	0.000349582
1675	0.000217003	0.000366081	0.000263697	0.00038271	0.000522041	0.000350306
1676	0.000217502	0.000366793	0.00026438	0.000383377	0.000522041	0.000350819
1677	0.000218001	0.000367246	0.000264517	0.0003836	0.000522041	0.000351081
1678	0.000218333	0.000367635	0.000264835	0.000383674	0.000522041	0.000351304
1679	0.000218333	0.000367635	0.000264881	0.000383748	0.000522041	0.000351328
1680	0.000218389	0.000367829	0.00026529	0.000383822	0.000522041	0.000351474
1681	0.000218721	0.000368023	0.0002657	0.000384267	0.000522041	0.00035175
1682	0.000218444	0.000366146	0.000265108	0.000384267	0.000523608	0.000351515
1683	0.000216005	0.000363105	0.000263288	0.000388864	0.000532231	0.000352699
1684	0.000220772	0.000381871	0.00027594	0.000408066	0.000547907	0.000366911
1685	0.000217447	0.000375271	0.000271935	0.000405471	0.000553394	0.000364704
1686	0.00021462	0.000375206	0.00026834	0.000415109	0.000569071	0.000368469
1687	0.000223544	0.00040012	0.000286863	0.000443208	0.000588667	0.00038848
1688	0.00022687	0.000411898	0.00029633	0.000454848	0.000598073	0.000397604
1689	0.000227479	0.000413516	0.000297604	0.000456702	0.000598857	0.000398832
1690	0.000227313	0.000411704	0.000296193	0.000453588	0.00059729	0.000397218
1691	0.000227424	0.000409957	0.000295419	0.000451883	0.00059337	0.000395611
1692	0.000196938	0.00032926	0.000243262	0.000371144	0.000496174	0.000327356
1693	0.000199543	0.000332366	0.00024663	0.000374777	0.000498525	0.000330368
1694	0.000188291	0.00030894	0.00022929	0.000342378	0.000466388	0.000307057
1695	0.000191229	0.000313987	0.000234524	0.000346011	0.000467955	0.000310741
1696	0.000191229	0.000314376	0.00023507	0.000345863	0.000467171	0.000310742
1697	0.000191284	0.000314182	0.000235207	0.000345788	0.000467171	0.000310726
1698	0.000190287	0.000312693	0.000233614	0.00034349	0.000465604	0.000309138
1699	0.000189511	0.000311917	0.000233068	0.000342749	0.000465604	0.00030857
1700	0.0001894	0.00031114	0.000232658	0.000342156	0.00046482	0.000308035
1701	0.000188624	0.000309911	0.00023193	0.000341044	0.000464036	0.000307109
1702	0.000186795	0.000307516	0.000230291	0.000338004	0.000462468	0.000305015
1703	0.000185797	0.000304669	0.000228289	0.000330442	0.000456198	0.000301079
1704	0.000185464	0.000303569	0.000227697	0.000328885	0.00045463	0.000300049
1705	0.000183469	0.000297292	0.000223647	0.000320729	0.000443656	0.000293759
1706	0.000181085	0.000289914	0.000218322	0.000312426	0.000432682	0.000286886
1707	9.68893e-05	0.000116095	0.000100445	0.000130264	0.000119928	0.000112724
1708	9.8275e-05	0.000116354	0.000100764	0.000130264	0.000118361	0.000112804
1709	8.05933e-05	0.000102052	8.35148e-05	0.000113137	0.000105819	9.70232e-05
1710	3.32572e-05	5.92124e-05	4.76057e-05	6.20551e-05	5.5653e-05	5.15567e-05
1711	5.17704e-05	6.57484e-05	6.05312e-05	7.68089e-05	6.89783e-05	6.47674e-05
1712	5.27681e-05	6.58778e-05	6.16235e-05	7.71055e-05	6.97622e-05	6.54274e-05
1713	5.31561e-05	6.53601e-05	6.1669e-05	7.66607e-05	6.97622e-05	6.53216e-05
1714	4.43984e-05	3.39096e-05	4.39192e-05	5.16014e-05	4.93822e-05	4.46422e-05
1715	5.95858e-05	5.13821e-05	6.59926e-05	7.50296e-05	7.28976e-05	6.49775e-05
1716	6.09161e-05	5.20293e-05	6.82682e-05	7.70314e-05	7.36814e-05	6.63853e-05
1717	5.63155e-05	4.69816e-05	6.26702e-05	6.80604e-05	5.64368e-05	5.80929e-05
1718	5.62601e-05	4.70464e-05	6.26702e-05	6.80604e-05	5.64368e-05	5.80948e-05
1719	5.61492e-05	4.67875e-05	6.26247e-05	6.75414e-05	5.64368e-05	5.79079e-05
1720	5.62601e-05	4.69169e-05	6.27157e-05	6.74673e-05	5.64368e-05	5.79594e-05
1721	5.55395e-05	4.54285e-05	6.11683e-05	6.50948e-05	5.5653e-05	5.65768e-05
1722	5.18812e-05	3.85042e-05	5.43415e-05	6.0424e-05	5.17337e-05	5.13769e-05
1723	5.16595e-05	3.81807e-05	5.4205e-05	6.00533e-05	5.09499e-05	5.10097e-05
1724	4.59504e-05	3.28742e-05	4.76967e-05	5.06376e-05	4.93822e-05	4.53082e-05
1725	5.10498e-05	3.47509e-05	5.22935e-05	5.17496e-05	4.93822e-05	4.78452e-05
1726	5.12161e-05	3.48156e-05	5.2339e-05	5.14531e-05	4.93822e-05	4.78412e-05
1727	5.14378e-05	3.48803e-05	5.31582e-05	5.16755e-05	4.78145e-05	4.77933e-05
1728	5.65927e-05	3.82454e-05	5.82556e-05	5.53084e-05	4.85984e-05	5.14001e-05
1729	5.78675e-05	3.86337e-05	5.89382e-05	5.56791e-05	4.85984e-05	5.19434e-05
1730	5.72578e-05	3.85689e-05	5.7937e-05	5.47894e-05	4.85984e-05	5.14303e-05
1731	5.72578e-05	3.86337e-05	5.7937e-05	5.47894e-05	4.85984e-05	5.14433e-05
1732	5.71469e-05	3.86984e-05	5.78915e-05	5.4567e-05	4.78145e-05	5.12237e-05
1733	5.69807e-05	3.85689e-05	5.76184e-05	5.42704e-05	4.78145e-05	5.10506e-05
1734	4.48972e-05	2.48498e-05	3.9459e-05	3.41044e-05	2.97861e-05	3.46193e-05
1735	4.71144e-05	2.60146e-05	4.1143e-05	3.57354e-05	2.97861e-05	3.59587e-05
1736	4.71144e-05	2.60793e-05	4.11885e-05	3.57354e-05	2.97861e-05	3.59807e-05
1737	4.70035e-05	2.59499e-05	4.09154e-05	3.4994e-05	2.97861e-05	3.57298e-05
1738	4.49526e-05	2.33614e-05	3.58181e-05	2.78766e-05	2.11638e-05	3.06345e-05
1739	2.46103e-05	1.19072e-05	1.93882e-05	1.25296e-05	3.91922e-06	1.44709e-05
1740	4.09064e-05	3.95396e-05	4.36006e-05	4.67823e-05	9.40614e-06	3.6047e-05
1741	4.63384e-05	4.96996e-05	5.4205e-05	6.1462e-05	1.4893e-05	4.53196e-05
1742	4.58949e-05	5.18998e-05	5.61165e-05	6.39086e-05	1.4893e-05	4.65426e-05
1743	4.80566e-05	5.9536e-05	6.09408e-05	7.33244e-05	1.56769e-05	5.15069e-05
1744	5.04955e-05	6.6978e-05	6.58561e-05	8.19987e-05	1.64607e-05	5.63578e-05
1745	5.25464e-05	7.47435e-05	7.01342e-05	9.31939e-05	1.64607e-05	6.14157e-05
1746	5.36549e-05	8.12795e-05	7.31835e-05	0.00010083	1.80284e-05	6.53953e-05
1747	5.10498e-05	8.24444e-05	7.1181e-05	0.000102684	1.72446e-05	6.49208e-05
1748	5.68144e-05	9.62282e-05	8.11937e-05	0.000112693	1.72446e-05	7.28348e-05
1749	5.77012e-05	9.74578e-05	8.2377e-05	0.000113879	1.72446e-05	7.37319e-05
1750	5.7923e-05	9.82343e-05	8.28776e-05	0.000114027	1.72446e-05	7.40613e-05
1751	5.78675e-05	9.82343e-05	8.28776e-05	0.000114027	1.72446e-05	7.40502e-05
1752	5.77567e-05	9.81049e-05	8.27411e-05	0.000114027	1.72446e-05	7.39749e-05
1753	5.77567e-05	9.81049e-05	8.27411e-05	0.000114027	1.72446e-05	7.39749e-05
1754	5.77567e-05	9.81049e-05	8.27411e-05	0.000114027	1.72446e-05	7.39749e-05
1755	5.77567e-05	9.81049e-05	8.27411e-05	0.000114027	1.72446e-05	7.39749e-05
1756	5.74795e-05	9.79755e-05	8.2559e-05	0.000113953	1.72446e-05	7.38423e-05
1757	5.74241e-05	9.79755e-05	8.2559e-05	0.000113879	1.64607e-05	7.36597e-05
1758	5.73687e-05	9.79755e-05	8.25135e-05	0.000113805	1.64607e-05	7.36247e-05
1759	5.73687e-05	9.79755e-05	8.25135e-05	0.000113805	1.64607e-05	7.36247e-05
1760	5.73687e-05	9.79755e-05	8.25135e-05	0.000113805	1.64607e-05	7.36247e-05
1761	5.73687e-05	9.79755e-05	8.2468e-05	0.000113731	1.64607e-05	7.36008e-05
1762	5.73687e-05	9.79755e-05	8.24225e-05	0.000113731	1.64607e-05	7.35917e-05
1763	5.73687e-05	9.79755e-05	8.24225e-05	0.000113656	1.64607e-05	7.35767e-05
1764	5.72578e-05	9.79108e-05	8.2377e-05	0.000113656	1.64607e-05	7.35325e-05
1765	5.72578e-05	9.79108e-05	8.2286e-05	0.000113656	1.64607e-05	7.35143e-05
1766	5.72578e-05	9.77813e-05	8.21949e-05	0.00011336	1.64607e-05	7.34109e-05
1767	5.54841e-05	8.7492e-05	7.46399e-05	0.000102684	1.4893e-05	6.70386e-05
1768	5.47081e-05	8.62624e-05	7.25464e-05	9.92733e-05	1.4893e-05	6.55366e-05
1769	6.65144e-07	1.29426e-06	5.46146e-07	1.03796e-06	7.83845e-07	8.65471e-07
1770	4.97195e-05	9.90109e-05	7.60963e-05	0.000103573	4.70307e-05	7.50861e-05
1771	5.08281e-05	0.000100758	7.77803e-05	0.000105279	4.70307e-05	7.63352e-05
1772	5.08281e-05	0.000100888	7.80533e-05	0.000105427	4.70307e-05	7.64454e-05
1773	5.09389e-05	0.000101017	7.82809e-05	0.000105575	4.70307e-05	7.65685e-05
1774	5.09389e-05	0.000101017	7.83264e-05	0.000105649	4.70307e-05	7.65924e-05
1775	5.09944e-05	0.000101017	7.83264e-05	0.000105649	4.70307e-05	7.66035e-05
1776	5.09944e-05	0.000101017	7.83264e-05	0.000105649	4.70307e-05	7.66035e-05
1777	5.09944e-05	0.000101017	7.83264e-05	0.000105649	4.70307e-05	7.66035e-05
1778	5.09944e-05	0.000101017	7.83264e-05	0.000105649	4.70307e-05	7.66035e-05
1779	5.09944e-05	0.000101017	7.83264e-05	0.000105649	4.70307e-05	7.66035e-05
1780	5.09944e-05	0.000101017	7.83719e-05	0.000105723	4.70307e-05	7.66274e-05
1781	5.10498e-05	0.000101017	7.84629e-05	0.000105723	4.70307e-05	7.66567e-05
1782	5.11052e-05	0.000101017	7.84629e-05	0.000105723	4.70307e-05	7.66678e-05
1783	5.10498e-05	0.000101017	7.84629e-05	0.000105723	4.70307e-05	7.66567e-05
1784	5.10498e-05	0.000101017	7.85085e-05	0.000105723	4.70307e-05	7.66658e-05
1785	5.10498e-05	0.000101082	7.8554e-05	0.000105723	4.70307e-05	7.66879e-05
1786	5.11052e-05	0.000101082	7.85995e-05	0.000105723	4.70307e-05	7.67081e-05
1787	5.11052e-05	0.000101146	7.85995e-05	0.000105649	4.70307e-05	7.67061e-05
1788	5.12161e-05	0.000100952	7.88726e-05	0.000105872	4.70307e-05	7.67887e-05
1789	5.12715e-05	9.71342e-05	7.69155e-05	0.000101942	4.5463e-05	7.45452e-05
1790	5.04401e-05	8.78803e-05	7.06804e-05	9.13404e-05	4.15438e-05	6.8377e-05
1791	4.97195e-05	8.05677e-05	6.69484e-05	8.31108e-05	3.99761e-05	6.40645e-05
1792	4.82784e-05	7.24786e-05	6.15779e-05	7.54744e-05	3.37053e-05	5.83029e-05
1793	4.43984e-05	5.23528e-05	4.81519e-05	5.51601e-05	2.82184e-05	4.56563e-05
1794	2.96543e-05	2.42674e-05	2.70797e-05	2.69128e-05	1.41092e-05	2.44047e-05
1795	3.79686e-05	2.80854e-05	3.01746e-05	2.98784e-05	1.41092e-05	2.80432e-05
1796	3.77469e-05	2.69206e-05	2.90823e-05	2.72093e-05	1.41092e-05	2.70137e-05
1797	3.78578e-05	2.71147e-05	2.92643e-05	2.72093e-05	1.41092e-05	2.71111e-05
1798	3.75252e-05	2.68559e-05	2.83541e-05	2.60972e-05	1.41092e-05	2.65883e-05
1799	2.716e-05	1.29426e-05	1.4928e-05	1.23814e-05	3.13538e-06	1.41095e-05
1800	3.13726e-05	1.50134e-05	1.72946e-05	1.3271e-05	4.70307e-06	1.63309e-05
1801	3.13172e-05	1.50781e-05	1.72946e-05	1.3271e-05	4.70307e-06	1.63328e-05
1802	3.14281e-05	1.50781e-05	1.72491e-05	1.31969e-05	4.70307e-06	1.63311e-05
1803	2.9488e-05	1.33956e-05	1.57472e-05	1.0083e-05	3.13538e-06	1.43698e-05
1804	2.40006e-05	1.12601e-05	1.26524e-05	7.26571e-06	2.35153e-06	1.15061e-05
1805	3.19823e-05	1.38486e-05	1.89786e-05	8.52609e-06	3.13538e-06	1.52942e-05
1806	3.19823e-05	1.37192e-05	1.91606e-05	8.30367e-06	3.13538e-06	1.52602e-05
1807	3.20932e-05	1.37839e-05	1.92061e-05	8.30367e-06	3.13538e-06	1.53045e-05
1808	3.18715e-05	1.37839e-05	1.92972e-05	8.30367e-06	3.13538e-06	1.52783e-05
1809	3.10955e-05	1.29426e-05	1.80683e-05	7.93297e-06	3.13538e-06	1.4635e-05
1810	2.86566e-05	1.25543e-05	1.68395e-05	7.41399e-06	3.13538e-06	1.372e-05
1811	3.65275e-05	1.75372e-05	2.48496e-05	1.06761e-05	3.13538e-06	1.85452e-05
1812	3.69155e-05	1.76019e-05	2.54868e-05	1.07503e-05	3.13538e-06	1.8778e-05
1813	3.40332e-05	1.60488e-05	2.38484e-05	9.86061e-06	3.13538e-06	1.73853e-05
1814	4.43984e-05	2.7956e-05	4.34186e-05	1.58659e-05	3.13538e-06	2.69549e-05
1815	4.46201e-05	2.82149e-05	4.38282e-05	1.60884e-05	3.13538e-06	2.71774e-05
1816	4.45646e-05	2.82796e-05	4.38737e-05	1.60884e-05	3.13538e-06	2.71883e-05
1817	4.44538e-05	2.82796e-05	4.39192e-05	1.60884e-05	3.13538e-06	2.71753e-05
1818	4.43429e-05	2.82149e-05	4.40102e-05	1.60884e-05	3.13538e-06	2.71584e-05
1819	4.27355e-05	2.65323e-05	4.23263e-05	1.51987e-05	2.35153e-06	2.58289e-05
1820	4.52298e-05	2.7503e-05	4.54666e-05	1.61625e-05	2.35153e-06	2.73427e-05
1821	4.46755e-05	2.72442e-05	4.51481e-05	1.60142e-05	2.35153e-06	2.70867e-05
1822	3.99641e-05	2.46557e-05	4.32365e-05	1.45314e-05	1.56769e-06	2.47911e-05
1823	5.33778e-05	4.33577e-05	6.09408e-05	2.89887e-05	5.48691e-06	3.84304e-05
1824	5.39875e-05	4.36813e-05	6.16235e-05	2.97301e-05	5.48691e-06	3.89019e-05
1825	5.47635e-05	4.43284e-05	6.25337e-05	3.06198e-05	5.48691e-06	3.95465e-05
1826	5.48189e-05	4.45873e-05	6.27613e-05	3.08422e-05	5.48691e-06	3.96993e-05
1827	5.48189e-05	4.43931e-05	6.27613e-05	3.09905e-05	5.48691e-06	3.96901e-05
1828	5.49298e-05	4.47167e-05	6.30343e-05	3.10646e-05	5.48691e-06	3.98465e-05
1829	5.48744e-05	4.47167e-05	6.31254e-05	3.09905e-05	5.48691e-06	3.98388e-05
1830	5.58721e-05	4.51697e-05	6.51734e-05	3.11388e-05	5.48691e-06	4.05682e-05
1831	5.58167e-05	4.51697e-05	6.52189e-05	3.10646e-05	5.48691e-06	4.05514e-05
1832	5.69252e-05	4.56227e-05	6.65843e-05	3.15095e-05	5.48691e-06	4.12257e-05
1833	5.70915e-05	4.57521e-05	6.67208e-05	3.15836e-05	5.48691e-06	4.1327e-05
1834	5.69252e-05	4.54932e-05	6.63567e-05	3.12129e-05	5.48691e-06	4.1095e-05
1835	5.65927e-05	4.52344e-05	6.60381e-05	3.08422e-05	5.48691e-06	4.08389e-05
1836	5.80338e-05	4.63345e-05	6.7449e-05	3.17319e-05	5.48691e-06	4.18072e-05
1837	5.82001e-05	4.65286e-05	6.75855e-05	3.17319e-05	5.48691e-06	4.19066e-05
1838	5.8311e-05	4.65934e-05	6.76311e-05	3.17319e-05	5.48691e-06	4.19509e-05
1839	5.83664e-05	4.65934e-05	6.754e-05	3.17319e-05	5.48691e-06	4.19437e-05
1840	5.82555e-05	4.65286e-05	6.754e-05	3.16577e-05	5.48691e-06	4.18937e-05
1841	5.8311e-05	4.65934e-05	6.77676e-05	3.16577e-05	5.48691e-06	4.19633e-05
1842	5.84772e-05	4.65934e-05	6.79496e-05	3.15095e-05	5.48691e-06	4.20033e-05
1843	5.83664e-05	4.63992e-05	6.78131e-05	3.14353e-05	5.48691e-06	4.19002e-05
1844	5.82001e-05	4.62698e-05	6.77221e-05	3.13612e-05	5.48691e-06	4.1808e-05
1845	5.80892e-05	4.62051e-05	6.754e-05	3.1287e-05	5.48691e-06	4.17216e-05
1846	5.77012e-05	4.56227e-05	6.72214e-05	3.06939e-05	4.70307e-06	4.11885e-05
1847	5.76458e-05	4.56227e-05	6.71759e-05	3.06939e-05	4.70307e-06	4.11683e-05
1848	5.54841e-05	4.30989e-05	6.3808e-05	2.70611e-05	4.70307e-06	3.8831e-05
1849	5.52624e-05	4.30341e-05	6.3808e-05	2.69869e-05	4.70307e-06	3.87589e-05
1850	5.35441e-05	4.07692e-05	6.06677e-05	2.47627e-05	4.70307e-06	3.68894e-05
1851	5.22138e-05	3.93455e-05	5.83011e-05	2.3873e-05	3.13538e-06	3.53738e-05
1852	1.0088e-05	3.75335e-06	5.91658e-06	2.52076e-06	1.56769e-06	4.76928e-06
1853	1.60189e-05	4.40048e-06	8.01014e-06	2.9656e-06	2.35153e-06	6.74933e-06
1854	1.61297e-05	4.4652e-06	8.01014e-06	2.9656e-06	2.35153e-06	6.78443e-06
1855	1.26932e-05	3.4945e-06	6.0076e-06	2.00178e-06	1.56769e-06	5.15295e-06
1856	2.5608e-05	7.11843e-06	1.45184e-05	3.78113e-06	1.56769e-06	1.05187e-05
1857	2.6772e-05	7.442e-06	1.54741e-05	4.00355e-06	1.56769e-06	1.10519e-05
1858	2.68275e-05	7.442e-06	1.52921e-05	3.92941e-06	1.56769e-06	1.10117e-05
1859	2.71046e-05	7.37728e-06	1.54741e-05	4.00355e-06	1.56769e-06	1.11054e-05
1860	2.72709e-05	7.50671e-06	1.56107e-05	4.07769e-06	1.56769e-06	1.12067e-05
1861	2.76589e-05	7.50671e-06	1.57472e-05	4.07769e-06	1.56769e-06	1.13116e-05
1862	2.78806e-05	7.37728e-06	1.59293e-05	4.30011e-06	1.56769e-06	1.1411e-05
1863	2.80469e-05	7.31257e-06	1.57017e-05	4.15183e-06	1.56769e-06	1.13561e-05
1864	2.80469e-05	7.11843e-06	1.56107e-05	4.30011e-06	2.35153e-06	1.14855e-05
1865	2.72709e-05	6.73015e-06	1.50645e-05	4.15183e-06	2.35153e-06	1.11138e-05
1866	2.74926e-05	6.14774e-06	1.44729e-05	3.92941e-06	2.35153e-06	1.08788e-05
1867	4.68926e-05	1.19719e-05	2.56233e-05	9.78647e-06	8.62229e-06	2.05793e-05
1868	4.76132e-05	1.20366e-05	2.58509e-05	9.86061e-06	8.62229e-06	2.07967e-05
1869	4.83892e-05	1.21013e-05	2.61695e-05	9.93475e-06	8.62229e-06	2.10434e-05
1870	4.85001e-05	1.21013e-05	2.61695e-05	1.00089e-05	8.62229e-06	2.10804e-05
1871	4.85001e-05	1.21013e-05	2.61695e-05	1.00089e-05	8.62229e-06	2.10804e-05
1872	4.73915e-05	1.15836e-05	2.49407e-05	9.63819e-06	8.62229e-06	2.04353e-05
1873	6.4907e-05	2.54969e-05	4.1234e-05	2.95077e-05	2.27315e-05	3.67754e-05
1874	6.51287e-05	2.54969e-05	4.16436e-05	2.95818e-05	2.27315e-05	3.69165e-05
1875	6.51841e-05	2.58205e-05	4.17802e-05	2.97301e-05	2.27315e-05	3.70493e-05
1876	6.52395e-05	2.58205e-05	4.18257e-05	2.97301e-05	2.27315e-05	3.70695e-05
1877	6.51287e-05	2.58205e-05	4.18257e-05	2.97301e-05	2.27315e-05	3.70473e-05
1878	6.35212e-05	2.44615e-05	3.95501e-05	2.93594e-05	2.27315e-05	3.59247e-05
1879	6.20247e-05	2.42027e-05	3.86398e-05	2.94335e-05	2.27315e-05	3.54064e-05
1880	6.24681e-05	2.42027e-05	3.86853e-05	2.9656e-05	2.27315e-05	3.55487e-05
1881	6.25235e-05	2.42027e-05	3.86398e-05	2.95077e-05	2.27315e-05	3.5521e-05
1882	5.77012e-05	2.31673e-05	3.56815e-05	2.92853e-05	2.27315e-05	3.37134e-05
1883	6.35212e-05	2.46557e-05	3.98686e-05	3.1287e-05	2.66507e-05	3.71966e-05
1884	6.32995e-05	2.45262e-05	3.97321e-05	3.1287e-05	2.66507e-05	3.70991e-05
1885	6.3355e-05	2.45262e-05	3.96866e-05	3.1287e-05	2.66507e-05	3.71011e-05
1886	5.69252e-05	2.21318e-05	3.40886e-05	2.97301e-05	2.42992e-05	3.3435e-05
1887	6.00847e-05	2.34908e-05	3.72745e-05	3.08422e-05	2.5083e-05	3.5355e-05
1888	6.00847e-05	2.35555e-05	3.73655e-05	3.07681e-05	2.5083e-05	3.53714e-05
1889	6.00847e-05	2.35555e-05	3.732e-05	3.06939e-05	2.5083e-05	3.53474e-05
1890	5.96967e-05	2.35555e-05	3.72745e-05	3.06198e-05	2.5083e-05	3.52459e-05
1891	5.9475e-05	2.35555e-05	3.72289e-05	3.04715e-05	2.5083e-05	3.51628e-05
1892	5.9475e-05	2.34908e-05	3.71834e-05	3.03974e-05	2.5083e-05	3.51259e-05
1893	5.17704e-05	1.92845e-05	3.20861e-05	2.543e-05	2.5083e-05	3.07308e-05
1894	4.08509e-05	1.51428e-05	2.6124e-05	1.98695e-05	2.27315e-05	2.49437e-05
1895	3.94098e-05	1.46899e-05	2.53503e-05	1.93505e-05	2.27315e-05	2.43064e-05
1896	2.06749e-05	5.17704e-06	1.25614e-05	6.74673e-06	7.0546e-06	1.04429e-05
1897	2.73263e-05	6.53601e-06	1.56562e-05	8.89679e-06	8.62229e-06	1.34075e-05
1898	2.71046e-05	6.40659e-06	1.53376e-05	8.30367e-06	8.62229e-06	1.3155e-05
1899	2.62732e-05	6.60073e-06	1.48825e-05	8.37781e-06	1.019e-05	1.32648e-05
1900	2.64949e-05	6.60073e-06	1.5019e-05	8.37781e-06	1.09738e-05	1.34932e-05
1901	2.64395e-05	6.66544e-06	1.53376e-05	8.22953e-06	1.09738e-05	1.35292e-05
1902	2.64949e-05	6.40659e-06	1.51555e-05	8.08125e-06	9.40614e-06	1.31089e-05
1903	2.00652e-05	5.11233e-06	1.08319e-05	6.07947e-06	5.48691e-06	9.51516e-06
1904	3.10401e-05	1.04835e-05	1.98433e-05	1.12693e-05	6.27076e-06	1.57814e-05
1905	3.12063e-05	1.06776e-05	2.00709e-05	1.13434e-05	6.27076e-06	1.59138e-05
1906	3.09292e-05	1.06129e-05	2.00709e-05	1.11951e-05	6.27076e-06	1.58158e-05
1907	3.12618e-05	1.11306e-05	2.08446e-05	1.14175e-05	6.27076e-06	1.61851e-05
1908	3.12063e-05	1.12601e-05	2.08446e-05	1.15658e-05	6.27076e-06	1.62295e-05
1909	3.09846e-05	1.09365e-05	2.0708e-05	1.13434e-05	6.27076e-06	1.60487e-05
1910	3.10401e-05	1.10012e-05	2.0708e-05	1.13434e-05	6.27076e-06	1.60727e-05
1911	3.05966e-05	1.08718e-05	2.0435e-05	1.11951e-05	6.27076e-06	1.58739e-05
1912	2.93218e-05	1.06776e-05	1.91606e-05	1.0602e-05	6.27076e-06	1.52066e-05
1913	2.60515e-05	9.90109e-06	1.79318e-05	1.0083e-05	5.48691e-06	1.38909e-05
1914	3.33126e-05	1.14542e-05	2.16183e-05	1.17882e-05	5.48691e-06	1.6732e-05
1915	3.35898e-05	1.14542e-05	2.17093e-05	1.17141e-05	5.48691e-06	1.67909e-05
1916	3.37006e-05	1.13895e-05	2.18003e-05	1.17141e-05	5.48691e-06	1.68183e-05
1917	3.24812e-05	1.09365e-05	2.06625e-05	1.08986e-05	4.70307e-06	1.59364e-05
1918	3.0264e-05	1.06129e-05	1.97523e-05	1.00089e-05	2.35153e-06	1.45979e-05
1919	3.76361e-05	1.35897e-05	2.39849e-05	1.49763e-05	3.13538e-06	1.86645e-05
1920	3.78578e-05	1.3525e-05	2.40759e-05	1.49021e-05	3.13538e-06	1.86992e-05
1921	3.87446e-05	1.40427e-05	2.444e-05	1.60884e-05	3.13538e-06	1.92902e-05
1922	4.02412e-05	1.46899e-05	2.6306e-05	1.77194e-05	3.91922e-06	2.05751e-05
1923	4.10172e-05	1.47546e-05	2.6397e-05	1.79419e-05	3.91922e-06	2.0806e-05
1924	4.07955e-05	1.45604e-05	2.58054e-05	1.74229e-05	3.91922e-06	2.05007e-05
1925	4.04629e-05	1.41074e-05	2.53958e-05	1.73487e-05	3.91922e-06	2.02468e-05
1926	4.05184e-05	1.41074e-05	2.53503e-05	1.72746e-05	3.91922e-06	2.0234e-05
1927	4.00749e-05	1.3978e-05	2.47586e-05	1.68298e-05	3.91922e-06	1.99121e-05
1928	3.76361e-05	1.26837e-05	2.21644e-05	1.47538e-05	2.35153e-06	1.79179e-05
1929	3.79132e-05	1.27485e-05	2.22099e-05	1.47538e-05	2.35153e-06	1.79954e-05
1930	3.78578e-05	1.2619e-05	2.18458e-05	1.46797e-05	2.35153e-06	1.78708e-05
1931	3.69155e-05	1.08718e-05	1.99343e-05	1.379e-05	2.35153e-06	1.67726e-05
1932	3.69155e-05	1.08071e-05	1.99343e-05	1.37159e-05	2.35153e-06	1.67449e-05
1933	3.69155e-05	1.08071e-05	1.98888e-05	1.37159e-05	2.35153e-06	1.67358e-05
1934	3.41441e-05	9.64224e-06	1.70215e-05	1.26779e-05	2.35153e-06	1.51675e-05
1935	3.20378e-05	9.12453e-06	1.58837e-05	1.26038e-05	2.35153e-06	1.44003e-05
1936	2.9876e-05	8.73626e-06	1.52011e-05	1.22331e-05	2.35153e-06	1.36796e-05
1937	2.8712e-05	8.41269e-06	1.46549e-05	1.19365e-05	2.35153e-06	1.32135e-05
1938	2.54972e-05	6.989e-06	1.19242e-05	1.04537e-05	1.56769e-06	1.12864e-05
1939	2.23378e-05	5.56532e-06	9.55755e-06	8.74851e-06	1.56769e-06	9.55537e-06
1940	2.18943e-05	5.50061e-06	9.23897e-06	8.37781e-06	1.56769e-06	9.31588e-06
1941	1.55755e-05	3.17094e-06	5.50697e-06	5.18979e-06	1.56769e-06	6.20218e-06
1942	7.1503e-06	1.55311e-06	1.866e-06	1.8535e-06	7.83845e-07	2.64135e-06
1943	7.20573e-06	1.55311e-06	1.91151e-06	1.77936e-06	0	2.48994e-06
1944	2.10629e-06	7.11843e-07	6.82682e-07	4.44839e-07	0	7.89131e-07
1945	3.43658e-06	9.70695e-07	1.36536e-06	1.03796e-06	0	1.36212e-06
1946	4.71144e-06	1.42369e-06	1.95702e-06	1.55694e-06	0	1.92982e-06
1947	4.15715e-06	1.16483e-06	1.72946e-06	1.4828e-06	0	1.70685e-06
1948	1.20834e-05	2.91209e-06	3.82302e-06	3.41044e-06	1.56769e-06	4.75933e-06
1949	1.23606e-05	2.84737e-06	3.95956e-06	3.48458e-06	1.56769e-06	4.84396e-06
1950	1.24714e-05	2.84737e-06	3.95956e-06	3.48458e-06	1.56769e-06	4.86612e-06
1951	1.24714e-05	2.84737e-06	3.95956e-06	3.48458e-06	1.56769e-06	4.86612e-06
1952	1.26932e-05	2.91209e-06	3.95956e-06	3.55872e-06	1.56769e-06	4.93825e-06
1953	1.26932e-05	2.9768e-06	3.91404e-06	3.55872e-06	1.56769e-06	4.94209e-06
1954	2.20606e-05	1.07424e-05	1.43818e-05	1.09727e-05	3.13538e-06	1.22586e-05
1955	2.23932e-05	1.08071e-05	1.45639e-05	1.1121e-05	3.13538e-06	1.24041e-05
1956	2.26703e-05	1.11306e-05	1.47004e-05	1.1121e-05	3.13538e-06	1.25515e-05
1957	2.27812e-05	1.11953e-05	1.48825e-05	1.12693e-05	3.13538e-06	1.26527e-05
1958	2.27812e-05	1.12601e-05	1.48825e-05	1.12693e-05	3.13538e-06	1.26657e-05
1959	2.27812e-05	1.12601e-05	1.48825e-05	1.12693e-05	3.13538e-06	1.26657e-05
1960	2.27812e-05	1.12601e-05	1.48825e-05	1.12693e-05	3.13538e-06	1.26657e-05
1961	2.24486e-05	1.12601e-05	1.4837e-05	1.12693e-05	3.13538e-06	1.25901e-05
1962	2.26149e-05	1.12601e-05	1.4928e-05	1.12693e-05	3.13538e-06	1.26415e-05
1963	2.26149e-05	1.12601e-05	1.4928e-05	1.12693e-05	3.13538e-06	1.26415e-05
1964	2.25595e-05	1.11306e-05	1.4837e-05	1.1121e-05	3.13538e-06	1.25567e-05
1965	2.07857e-05	1.06129e-05	1.39267e-05	1.02313e-05	3.13538e-06	1.17384e-05
1966	2.41669e-05	1.12601e-05	1.53831e-05	1.07503e-05	3.13538e-06	1.29392e-05
1967	2.43886e-05	1.13248e-05	1.53831e-05	1.06761e-05	3.13538e-06	1.29816e-05
1968	2.43886e-05	1.13248e-05	1.53831e-05	1.06761e-05	3.13538e-06	1.29816e-05
1969	2.43332e-05	1.13248e-05	1.53831e-05	1.06761e-05	3.13538e-06	1.29705e-05
1970	2.42223e-05	1.13248e-05	1.53831e-05	1.06761e-05	3.13538e-06	1.29483e-05
1971	2.38898e-05	1.13248e-05	1.53376e-05	1.03796e-05	3.13538e-06	1.28134e-05
1972	2.38898e-05	1.13248e-05	1.53831e-05	1.03796e-05	3.13538e-06	1.28225e-05
1973	2.38343e-05	1.10659e-05	1.52466e-05	9.86061e-06	3.13538e-06	1.26286e-05
1974	2.24486e-05	9.31867e-06	1.33351e-05	8.45195e-06	3.13538e-06	1.13379e-05
1975	2.00652e-05	7.9597e-06	1.1105e-05	6.67259e-06	3.13538e-06	9.78757e-06
1976	1.7848e-05	6.73015e-06	9.55755e-06	5.85705e-06	3.13538e-06	8.62563e-06
1977	8.48059e-06	2.0061e-06	2.68522e-06	1.03796e-06	1.56769e-06	3.15551e-06
1978	9.25659e-06	2.07082e-06	2.73073e-06	1.77936e-06	7.83845e-07	3.32427e-06
1979	8.97944e-06	2.0061e-06	2.6397e-06	1.70522e-06	7.83845e-07	3.22286e-06
1980	6.59601e-06	1.4884e-06	2.27561e-06	1.4828e-06	7.83845e-07	2.52533e-06
1981	8.81316e-06	1.94139e-06	3.14034e-06	1.55694e-06	1.56769e-06	3.4039e-06
1982	8.81316e-06	1.94139e-06	3.14034e-06	1.55694e-06	1.56769e-06	3.4039e-06
1983	8.36973e-06	1.87668e-06	2.91278e-06	1.55694e-06	1.56769e-06	3.25676e-06
1984	1.06423e-05	2.13553e-06	3.77751e-06	2.37248e-06	1.56769e-06	4.0991e-06
1985	1.06977e-05	2.13553e-06	3.77751e-06	2.37248e-06	1.56769e-06	4.11018e-06
1986	9.14573e-06	1.74725e-06	3.0038e-06	2.15006e-06	1.56769e-06	3.52291e-06
1987	1.26377e-05	2.71795e-06	5.14287e-06	3.26216e-06	1.56769e-06	5.06567e-06
1988	1.26932e-05	2.78266e-06	5.14287e-06	3.26216e-06	1.56769e-06	5.08972e-06
1989	1.26377e-05	2.71795e-06	5.09736e-06	3.26216e-06	1.56769e-06	5.05657e-06
1990	1.26377e-05	2.71795e-06	5.09736e-06	3.26216e-06	1.56769e-06	5.05657e-06
1991	1.25823e-05	2.71795e-06	5.09736e-06	3.26216e-06	1.56769e-06	5.04549e-06
1992	1.15846e-05	2.71795e-06	4.77878e-06	3.11388e-06	1.56769e-06	4.75258e-06
1993	1.30812e-05	3.17094e-06	5.96209e-06	3.78113e-06	1.56769e-06	5.51261e-06
1994	1.30257e-05	3.17094e-06	6.0076e-06	3.78113e-06	1.56769e-06	5.51061e-06
1995	1.30812e-05	3.17094e-06	6.0076e-06	3.78113e-06	1.56769e-06	5.52171e-06
1996	1.2416e-05	2.91209e-06	5.64351e-06	3.63286e-06	1.56769e-06	5.23443e-06
1997	1.29703e-05	3.17094e-06	6.0076e-06	3.85527e-06	1.56769e-06	5.51436e-06
1998	1.31366e-05	3.17094e-06	6.0076e-06	3.92941e-06	1.56769e-06	5.56245e-06
1999	1.19726e-05	2.91209e-06	5.78004e-06	3.55872e-06	1.56769e-06	5.15823e-06
[truncated: 7,180 more rows]

## Sheet: CANC DIS-GAGA
bp	CLIP43_density	CLIP54_density	average
1	2.88716e-06	1.21083e-06	2.04899e-06
2	6.21849e-06	1.21083e-06	3.71466e-06
3	6.88476e-06	2.42166e-06	4.65321e-06
4	8.66147e-06	3.63248e-06	6.14698e-06
5	8.88356e-06	3.63248e-06	6.25802e-06
6	9.54983e-06	3.63248e-06	6.59116e-06
7	9.54983e-06	3.63248e-06	6.59116e-06
8	1.11044e-05	3.63248e-06	7.36847e-06
9	1.39916e-05	3.63248e-06	8.81204e-06
10	1.62125e-05	7.26497e-06	1.17387e-05
11	1.79892e-05	8.4758e-06	1.32325e-05
12	1.79892e-05	8.4758e-06	1.32325e-05
13	1.82113e-05	8.4758e-06	1.33435e-05
14	4.4862e-05	8.4758e-06	2.66689e-05
15	4.50841e-05	8.4758e-06	2.67799e-05
16	4.59724e-05	8.4758e-06	2.72241e-05
17	4.59724e-05	8.4758e-06	2.72241e-05
18	4.68608e-05	8.4758e-06	2.76683e-05
19	5.90757e-05	1.33191e-05	3.61974e-05
20	5.9964e-05	1.45299e-05	3.7247e-05
21	6.04082e-05	1.45299e-05	3.74691e-05
22	5.88536e-05	1.33191e-05	3.60863e-05
23	8.35055e-05	1.81624e-05	5.08339e-05
24	0.000112377	1.81624e-05	6.52697e-05
25	0.000114376	2.05841e-05	6.74799e-05
26	0.000115042	2.05841e-05	6.78131e-05
27	0.000115264	2.05841e-05	6.79241e-05
28	0.000115264	2.05841e-05	6.79241e-05
29	0.000117485	2.17949e-05	6.964e-05
30	0.000109934	1.93733e-05	6.46536e-05
31	0.000191441	2.7849e-05	0.000109645
32	0.000201879	2.7849e-05	0.000114864
33	0.000206099	2.7849e-05	0.000116974
34	0.000209208	2.7849e-05	0.000118528
35	0.000209652	2.7849e-05	0.000118751
36	0.000208542	2.54274e-05	0.000116984
37	0.000214982	2.66382e-05	0.00012081
38	0.000224976	3.26924e-05	0.000128834
39	0.000226087	3.39032e-05	0.000129995
40	0.000225864	3.63248e-05	0.000131095
41	0.000224754	3.63248e-05	0.000130539
42	0.000225198	3.63248e-05	0.000130762
43	0.000224976	3.63248e-05	0.00013065
44	0.000217425	3.63248e-05	0.000126875
45	0.000190552	3.26924e-05	0.000111622
46	0.000202989	3.5114e-05	0.000119052
47	0.000206321	3.5114e-05	0.000120717
48	0.000201213	3.26924e-05	0.000116952
49	0.000198548	3.26924e-05	0.00011562
50	0.000207653	3.5114e-05	0.000121384
51	0.000207431	3.5114e-05	0.000121273
52	0.000207431	3.5114e-05	0.000121273
53	0.000207431	3.5114e-05	0.000121273
54	0.000206321	3.5114e-05	0.000120717
55	0.000205654	3.5114e-05	0.000120384
56	0.000189442	3.26924e-05	0.000111067
57	0.000167899	2.90599e-05	9.84796e-05
58	0.000123704	2.17949e-05	7.27492e-05
59	0.000124814	2.17949e-05	7.33045e-05
60	0.000118151	1.93733e-05	6.87623e-05
61	0.000111711	1.93733e-05	6.5542e-05
62	0.000110378	1.93733e-05	6.48757e-05
63	0.000107713	1.93733e-05	6.35432e-05
64	0.000107269	1.93733e-05	6.33211e-05
65	9.79412e-05	1.33191e-05	5.56302e-05
66	0.000102605	1.57408e-05	5.91729e-05
67	0.000102161	1.57408e-05	5.89508e-05
68	0.000101939	1.57408e-05	5.88398e-05
69	8.03962e-05	1.08975e-05	4.56468e-05
70	7.86195e-05	1.08975e-05	4.47585e-05
71	7.66207e-05	1.08975e-05	4.37591e-05
72	6.55162e-05	6.05414e-06	3.57852e-05
73	7.43998e-05	7.26497e-06	4.08324e-05
74	8.66147e-05	9.68663e-06	4.81507e-05
75	5.79652e-05	7.26497e-06	3.26151e-05
76	0.00035401	0.000154986	0.000254498
77	0.000358007	0.000154986	0.000256497
78	0.000358452	0.000154986	0.000256719
79	0.000359118	0.000154986	0.000257052
80	0.000356453	0.000156197	0.000256325
81	0.000371555	0.000177992	0.000274773
82	0.000377107	0.000181624	0.000279366
83	0.000403314	0.0001901	0.000296707
84	0.000403758	0.000192522	0.00029814
85	0.000636951	0.000705913	0.000671432
86	0.000703356	0.000836682	0.000770019
87	0.000733782	0.000887537	0.00081066
88	0.000874586	0.00114787	0.00101123
89	0.000882582	0.00116966	0.00102612
90	0.000888356	0.00118298	0.00103567
91	0.000889244	0.00118782	0.00103853
92	0.000926999	0.001252	0.0010895
93	0.00092811	0.001252	0.00109005
94	0.000919226	0.00125321	0.00108622
95	0.000874808	0.00125926	0.00106704
96	0.00145335	0.00177265	0.001613
97	0.00147045	0.00180413	0.00163729
98	0.00147489	0.00180777	0.00164133
99	0.00148111	0.00181019	0.00164565
100	0.00146956	0.00182835	0.00164896
101	0.00297066	0.00448006	0.00372536
102	0.00304217	0.00458299	0.00381258
103	0.00317832	0.0047634	0.00397086
104	0.00391121	0.00583619	0.0048737
105	0.00397473	0.00590642	0.00494057
106	0.00408999	0.00594759	0.00501879
107	0.00409843	0.00595001	0.00502422
108	0.00412619	0.00595485	0.00504052
109	0.00412597	0.00595243	0.0050392
110	0.00413885	0.00595606	0.00504746
111	0.00415329	0.0059597	0.00505649
112	0.00416439	0.00596212	0.00506325
113	0.0041635	0.00595849	0.00506099
114	0.00416994	0.00595849	0.00506421
115	0.00416572	0.00595001	0.00505787
116	0.00419793	0.00596454	0.00508123
117	0.00418926	0.00593548	0.00506237
118	0.00420792	0.00591853	0.00506322
119	0.00427899	0.00592943	0.00510421
120	0.004253	0.00586162	0.00505731
121	0.00430364	0.00585799	0.00508081
122	0.00428565	0.0057817	0.00503368
123	0.00430675	0.00577323	0.00503999
124	0.00430875	0.00577323	0.00504099
125	0.00428299	0.0057248	0.00500389
126	0.00413929	0.00562066	0.00487998
127	0.00409687	0.00555528	0.00482608
128	0.00400449	0.00539182	0.00469815
129	0.00400715	0.00538819	0.00469767
130	0.00399449	0.00536034	0.00467741
131	0.00338997	0.00411318	0.00375158
132	0.00335821	0.00397999	0.0036691
133	0.00334177	0.00390976	0.00362577
134	0.00250228	0.00198213	0.0022422
135	0.00138761	0.000587252	0.000987432
136	0.00141004	0.000592095	0.00100107
137	0.000883914	0.000490385	0.00068715
138	0.00088347	0.000490385	0.000686928
139	0.000882359	0.000487964	0.000685162
140	0.00087925	0.000487964	0.000683607
141	0.000837498	0.000446796	0.000642147
142	0.000769538	0.000421368	0.000595453
143	0.000721789	0.000410471	0.00056613
144	0.000704244	0.00039473	0.000549487
145	0.000620072	0.000340243	0.000480158
146	0.000342683	0.000168305	0.000255494
147	0.000357341	0.00017557	0.000266456
148	0.000356897	0.000176781	0.000266839
149	0.000355342	0.00017557	0.000265456
150	0.000294712	0.000129559	0.000212135
151	0.000217869	0.000105342	0.000161606
152	0.000189442	9.32338e-05	0.000141338
153	0.000185222	9.80771e-05	0.00014165
154	0.000188554	0.00010292	0.000145737
155	0.000167011	0.000107764	0.000137387
156	0.000113932	8.59688e-05	9.99502e-05
157	0.000203656	0.00013198	0.000167818
158	0.000205654	0.00013198	0.000168817
159	0.000205876	0.00013198	0.000168928
160	0.000207431	0.000130769	0.0001691
161	0.000275834	0.000173148	0.000224491
162	0.000280276	0.00017557	0.000227923
163	0.000285162	0.000176781	0.000230972
164	0.000316699	0.000188889	0.000252794
165	0.000318476	0.000188889	0.000253682
166	0.000350901	0.000199787	0.000275344
167	0.000354454	0.000202208	0.000278331
168	0.000354454	0.000202208	0.000278331
169	0.000354454	0.000202208	0.000278331
170	0.000354454	0.000202208	0.000278331
171	0.000354232	0.000202208	0.00027822
172	0.000344904	0.0001901	0.000267502
173	0.000345348	0.000197365	0.000271357
174	0.000340462	0.000197365	0.000268914
175	0.000338686	0.000193733	0.000266209
176	0.000308926	0.000191311	0.000250118
177	0.000317365	0.000191311	0.000254338
178	0.000317587	0.0001901	0.000253844
179	0.000234526	0.000147721	0.000191123
180	0.000272281	0.000150143	0.000211212
181	0.000280498	0.000147721	0.00021411
182	0.000274502	0.000140456	0.000207479
183	0.000276501	0.000139245	0.000207873
184	0.000261843	0.000136824	0.000199333
185	0.000255402	0.000129559	0.00019248
186	0.000255402	0.000129559	0.00019248
187	0.000240967	0.000119872	0.000180419
188	0.000216759	0.000107764	0.000162261
189	0.000186111	8.71796e-05	0.000136645
190	0.000194328	8.59688e-05	0.000140148
191	0.000194106	8.35471e-05	0.000138826
192	0.000193217	8.23363e-05	0.000137777
193	0.000119484	1.69516e-05	6.82177e-05
194	0.000399538	0.000151354	0.000275446
195	0.000402869	0.000151354	0.000277111
196	0.000403758	0.000151354	0.000277556
197	0.00040398	0.000151354	0.000277667
198	0.000404202	0.000151354	0.000277778
199	0.000400204	0.000150143	0.000275174
200	0.000393764	0.000147721	0.000270742
201	0.000383548	0.000142878	0.000263213
202	0.000454616	0.000162251	0.000308434
203	0.000459058	0.000162251	0.000310654
204	0.00045928	0.00016104	0.00031016
205	0.000459502	0.00016104	0.000310271
206	0.000460168	0.00016104	0.000310604
207	0.000421747	0.000158618	0.000290183
208	0.000526573	0.000251852	0.000389213
209	0.00053368	0.000260328	0.000397004
210	0.000534568	0.000261539	0.000398054
211	0.000538344	0.00026275	0.000400547
212	0.000566993	0.000271226	0.000419109
213	0.000423968	0.000158618	0.000291293
214	0.000639838	0.000348719	0.000494278
215	0.000640505	0.000352351	0.000496428
216	0.00064317	0.000352351	0.00049776
217	0.000642948	0.00035114	0.000497044
218	0.00059853	0.000342664	0.000470597
219	0.00056033	0.000339032	0.000449681
220	0.000662047	0.000369303	0.000515675
221	0.00066449	0.000371724	0.000518107
222	0.000668488	0.000374146	0.000521317
223	0.000669376	0.000374146	0.000521761
224	0.000643836	0.000370513	0.000507175
225	0.00064428	0.000371724	0.000508002
226	0.000643614	0.000371724	0.000507669
227	0.00064428	0.000370513	0.000507397
228	0.00062518	0.000337821	0.000481501
229	0.000618296	0.000334189	0.000476242
230	0.000607191	0.000332978	0.000470084
231	0.000608302	0.000332978	0.00047064
232	0.000593422	0.000331767	0.000462594
233	0.000569214	0.000319659	0.000444436
234	0.000579874	0.000328134	0.000454004
235	0.000579208	0.000326924	0.000453066
236	0.000520577	0.000296653	0.000408615
237	0.000528572	0.000296653	0.000412612
238	0.000485931	0.000285755	0.000385843
239	0.000579874	0.000312394	0.000446134
240	0.000581651	0.000312394	0.000447022
241	0.000581207	0.000309972	0.000445589
242	0.000581651	0.000312394	0.000447022
243	0.000572323	0.000311183	0.000441753
244	0.000553002	0.000299075	0.000426038
245	0.00054856	0.000296653	0.000422606
246	0.000558998	0.00030755	0.000433274
247	0.000559664	0.000305129	0.000432396
248	0.000554778	0.000303918	0.000429348
249	0.000554112	0.000305129	0.00042962
250	0.000554112	0.000308761	0.000431437
251	0.000555	0.000308761	0.000431881
252	0.000555445	0.000305129	0.000430287
253	0.000553668	0.00030755	0.000430609
254	0.000552779	0.000308761	0.00043077
255	0.000500144	0.00029181	0.000395977
256	0.000500589	0.000295442	0.000398015
257	0.000496369	0.000283334	0.000389851
258	0.000502365	0.000286966	0.000394666
259	0.00046461	0.000251852	0.000358231
260	0.000472383	0.000265171	0.000368777
261	0.000472383	0.000265171	0.000368777
262	0.000446177	0.000261539	0.000353858
263	0.000327581	0.00020463	0.000266106
264	0.000328247	0.000205841	0.000267044
265	0.000160348	0.000107764	0.000134056
266	0.000162347	0.000106553	0.00013445
267	0.000161237	0.000106553	0.000133895
268	0.000162791	0.000105342	0.000134067
269	0.000149466	0.000105342	0.000127404
270	0.000165456	0.000115029	0.000140242
271	0.000165678	0.000118661	0.00014217
272	0.000163902	0.000118661	0.000141281
273	0.000164568	0.000118661	0.000141615
274	0.000164568	0.000118661	0.000141615
275	0.000165234	0.000118661	0.000141948
276	0.000163902	0.000118661	0.000141281
277	0.000166567	0.000118661	0.000142614
278	0.000160126	0.00011745	0.000138788
279	0.00014458	0.000105342	0.000124961
280	0.000156129	0.000108975	0.000132552
281	0.000156129	0.000108975	0.000132552
282	0.000144358	0.000104131	0.000124245
283	0.000141915	0.000100499	0.000121207
284	0.000275612	0.000108975	0.000192293
285	0.000286717	0.000110185	0.000198451
286	0.000285384	9.08121e-05	0.000188098
287	0.000859484	0.000542451	0.000700968
288	0.000882359	0.000553348	0.000717854
289	0.000896129	0.000556981	0.000726555
290	0.00087814	0.000515813	0.000696976
291	0.00156617	0.000842736	0.00120445
292	0.00158194	0.000840315	0.00121113
293	0.00163258	0.000856056	0.00124432
294	0.00163879	0.000858477	0.00124864
295	0.00170209	0.000893591	0.00129784
296	0.00283741	0.00217344	0.00250542
297	0.00327181	0.00265656	0.00296419
298	0.0034044	0.00279217	0.00309829
299	0.00344993	0.00281033	0.00313013
300	0.00347747	0.00283092	0.00315419
301	0.00349923	0.00284787	0.00317355
302	0.00364803	0.00305008	0.00334906
303	0.00373842	0.00316026	0.00344934
304	0.00379461	0.00321838	0.0035065
305	0.00403958	0.0034666	0.00375309
306	0.00405801	0.00348113	0.00376957
307	0.00406489	0.00348718	0.00377604
308	0.00407023	0.00349445	0.00378234
309	0.00420859	0.00366518	0.00393688
310	0.00421325	0.00366518	0.00393921
311	0.00421214	0.00366518	0.00393866
312	0.00423812	0.00370756	0.00397284
313	0.00423035	0.00370635	0.00396835
314	0.00423968	0.00370877	0.00397422
315	0.00424101	0.00370998	0.00397549
316	0.00424234	0.00371119	0.00397677
317	0.00424035	0.00370877	0.00397456
318	0.00374198	0.00359011	0.00366604
319	0.00380394	0.00364096	0.00372245
320	0.00380239	0.00364217	0.00372228
321	0.00372288	0.00363975	0.00368131
322	0.00367135	0.00362885	0.0036501
323	0.00367224	0.00363006	0.00365115
324	0.0034748	0.00359011	0.00353245
325	0.00347591	0.00358889	0.00353241
326	0.00305283	0.00352835	0.00329059
327	0.00303174	0.00352835	0.00328005
328	0.00198392	0.0031978	0.00259086
329	0.00197681	0.00319659	0.0025867
330	0.00197526	0.00319174	0.0025835
331	0.00197548	0.00318206	0.00257877
332	0.00186755	0.00308398	0.00247576
333	0.00186333	0.00307914	0.00247123
334	0.00186399	0.00307914	0.00247156
335	0.00186288	0.00305492	0.0024589
336	0.00184023	0.00294837	0.0023943
337	0.00184134	0.00293747	0.0023894
338	0.00174762	0.00265898	0.0022033
339	0.00173229	0.00254395	0.00213812
340	0.00173163	0.00254395	0.00213779
341	0.00150865	0.00225335	0.001881
342	0.00150154	0.00225214	0.00187684
343	0.00147756	0.00218191	0.00182974
344	0.00110489	0.00142151	0.0012632
345	0.00110423	0.00141909	0.00126166
346	0.00103116	0.00117329	0.00110223
347	0.000925001	0.00106311	0.000994054
348	0.00092389	0.00105221	0.00098805
349	0.000906789	0.00102678	0.000966786
350	0.000262509	8.96013e-05	0.000176055
351	0.000302263	0.000121083	0.000211673
352	0.000303151	0.000119872	0.000211512
353	0.000202545	8.11255e-05	0.000141835
354	0.000221423	9.44446e-05	0.000157934
355	0.000223199	9.68663e-05	0.000160033
356	0.000223866	9.68663e-05	0.000160366
357	0.000216537	9.44446e-05	0.000155491
358	0.000219868	9.56554e-05	0.000157762
359	0.000220756	9.56554e-05	0.000158206
360	0.000220756	9.56554e-05	0.000158206
361	0.000220756	9.56554e-05	0.000158206
362	0.000218091	9.20229e-05	0.000155057
363	0.000218091	9.20229e-05	0.000155057
364	0.000217647	9.08121e-05	0.00015423
365	0.000217425	9.08121e-05	0.000154119
366	0.000218091	9.08121e-05	0.000154452
367	0.000217203	8.83905e-05	0.000152797
368	0.000192107	7.26497e-05	0.000132378
369	0.000214316	7.26497e-05	0.000143483
370	0.000215204	7.26497e-05	0.000143927
371	0.000217203	7.26497e-05	0.000144926
372	0.000163013	6.05414e-05	0.000111777
373	0.000251627	0.000115029	0.000183328
374	0.000262509	0.000118661	0.000190585
375	0.000264508	0.000118661	0.000191585
376	0.000262065	0.000118661	0.000190363
377	0.000293602	0.000142878	0.00021824
378	0.000300708	0.000148932	0.00022482
379	0.000301819	0.000148932	0.000225375
380	0.000302929	0.000148932	0.000225931
381	0.000302041	0.000148932	0.000225486
382	0.000300042	0.000148932	0.000224487
383	0.00029027	0.000147721	0.000218996
384	0.000281609	0.00014651	0.00021406
385	0.000281609	0.000144089	0.000212849
386	0.000279388	0.000140456	0.000209922
387	0.000269838	0.000128348	0.000199093
388	0.00026362	0.00013198	0.0001978
389	0.000272281	0.000177992	0.000225136
390	0.00028072	0.000198576	0.000239648
391	0.00028072	0.000199787	0.000240254
392	0.000245186	0.000186468	0.000215827
393	0.000233416	0.0001901	0.000211758
394	0.000233416	0.0001901	0.000211758
395	0.000233193	0.0001901	0.000211647
396	0.000232749	0.000186468	0.000209608
397	0.000221867	0.000185257	0.000203562
398	0.000181003	0.000177992	0.000179497
399	0.000181003	0.000177992	0.000179497
400	0.000181003	0.000177992	0.000179497
401	0.000181003	0.000177992	0.000179497
402	0.000180558	0.000177992	0.000179275
403	0.000180336	0.000177992	0.000179164
404	0.000179892	0.000177992	0.000178942
405	0.000179892	0.000177992	0.000178942
406	0.000172341	0.000176781	0.000174561
407	0.000172119	0.000176781	0.00017445
408	0.000171009	0.000174359	0.000172684
409	0.000170786	0.000171938	0.000171362
410	0.000167011	0.000156197	0.000161604
411	0.000164568	0.000152564	0.000158566
412	1.11044e-05	7.26497e-06	9.18471e-06
413	1.13265e-05	8.4758e-06	9.90117e-06
414	1.13265e-05	8.4758e-06	9.90117e-06
415	7.55102e-06	4.84331e-06	6.19717e-06
416	8.66147e-06	4.84331e-06	6.75239e-06
417	8.66147e-06	2.42166e-06	5.54156e-06
418	1.11044e-05	2.42166e-06	6.76305e-06
419	1.13265e-05	2.42166e-06	6.8741e-06
420	1.06603e-05	2.42166e-06	6.54096e-06
421	1.02161e-05	2.42166e-06	6.31887e-06
422	8.88356e-06	2.42166e-06	5.65261e-06
423	1.68788e-05	6.05414e-06	1.14665e-05
424	1.68788e-05	6.05414e-06	1.14665e-05
425	1.84334e-05	6.05414e-06	1.22438e-05
426	1.86555e-05	6.05414e-06	1.23548e-05
427	1.77671e-05	4.84331e-06	1.13052e-05
428	2.30973e-05	4.84331e-06	1.39703e-05
429	2.30973e-05	4.84331e-06	1.39703e-05
430	3.28692e-05	1.21083e-05	2.24887e-05
431	3.17587e-05	1.21083e-05	2.19335e-05
432	6.17407e-05	3.26924e-05	4.72165e-05
433	6.64046e-05	3.5114e-05	5.07593e-05
434	6.70709e-05	3.5114e-05	5.10924e-05
435	0.000107713	8.59688e-05	9.6841e-05
436	0.000109934	8.83905e-05	9.91622e-05
437	0.000121483	9.68663e-05	0.000109174
438	0.000122815	9.68663e-05	0.000109841
439	0.000122815	9.68663e-05	0.000109841
440	0.000122593	9.68663e-05	0.00010973
441	0.000134364	9.92879e-05	0.000116826
442	0.000134586	9.92879e-05	0.000116937
443	0.000134586	9.92879e-05	0.000116937
444	0.000132587	9.80771e-05	0.000115332
445	0.000160126	0.000104131	0.000132129
446	0.000160792	0.000104131	0.000132462
447	0.000161681	0.000104131	0.000132906
448	0.000162125	0.000104131	0.000133128
449	0.000162125	0.000104131	0.000133128
450	0.000162125	0.000104131	0.000133128
451	0.000156573	9.92879e-05	0.00012793
452	0.00013081	7.99147e-05	0.000105363
453	0.000139472	8.4758e-05	0.000112115
454	0.000139472	8.4758e-05	0.000112115
455	0.000139472	8.4758e-05	0.000112115
456	0.000139028	8.4758e-05	0.000111893
457	0.000103271	5.20656e-05	7.76685e-05
458	0.000105492	6.41739e-05	8.48331e-05
459	0.000105714	6.41739e-05	8.49441e-05
460	0.000104826	6.17522e-05	8.32891e-05
461	0.000100606	5.56981e-05	7.81522e-05
462	9.61645e-05	4.48006e-05	7.04826e-05
463	9.70529e-05	4.35898e-05	7.03213e-05
464	5.9964e-05	3.14815e-05	4.57228e-05
465	6.9958e-05	3.87465e-05	5.43523e-05
466	6.9958e-05	3.87465e-05	5.43523e-05
467	6.70709e-05	3.75357e-05	5.23033e-05
468	3.59784e-05	2.66382e-05	3.13083e-05
469	5.30793e-05	4.11682e-05	4.71237e-05
470	5.35234e-05	4.11682e-05	4.73458e-05
471	5.21909e-05	4.11682e-05	4.66795e-05
472	5.15246e-05	4.11682e-05	4.63464e-05
473	5.13026e-05	3.99573e-05	4.56299e-05
474	5.13026e-05	3.99573e-05	4.56299e-05
475	5.13026e-05	3.99573e-05	4.56299e-05
476	5.13026e-05	3.99573e-05	4.56299e-05
477	4.95258e-05	3.99573e-05	4.47416e-05
478	4.95258e-05	3.87465e-05	4.41362e-05
479	4.95258e-05	3.63248e-05	4.29253e-05
480	4.93038e-05	3.26924e-05	4.09981e-05
481	4.70829e-05	3.02707e-05	3.86768e-05
482	3.95318e-05	2.66382e-05	3.3085e-05
483	4.64166e-05	3.63248e-05	4.13707e-05
484	4.64166e-05	3.63248e-05	4.13707e-05
485	4.77491e-05	3.63248e-05	4.2037e-05
486	4.7527e-05	3.63248e-05	4.19259e-05
487	4.7527e-05	3.63248e-05	4.19259e-05
488	2.17647e-05	1.33191e-05	1.75419e-05
489	2.42077e-05	1.33191e-05	1.87634e-05
490	2.39856e-05	1.33191e-05	1.86524e-05
491	2.17647e-05	1.33191e-05	1.75419e-05
492	3.37575e-05	1.57408e-05	2.47491e-05
493	3.42017e-05	1.57408e-05	2.49712e-05
494	3.44238e-05	1.57408e-05	2.50823e-05
495	3.44238e-05	1.57408e-05	2.50823e-05
496	3.44238e-05	1.57408e-05	2.50823e-05
497	3.44238e-05	1.57408e-05	2.50823e-05
498	3.42017e-05	1.45299e-05	2.43658e-05
499	3.37575e-05	1.45299e-05	2.41437e-05
500	3.37575e-05	1.45299e-05	2.41437e-05
501	3.19808e-05	1.45299e-05	2.32554e-05
502	3.28692e-05	1.45299e-05	2.36996e-05
503	3.28692e-05	1.45299e-05	2.36996e-05
504	3.28692e-05	1.45299e-05	2.36996e-05
505	2.37635e-05	4.84331e-06	1.43034e-05
506	2.59844e-05	4.84331e-06	1.54139e-05
507	2.62065e-05	4.84331e-06	1.55249e-05
508	2.62065e-05	4.84331e-06	1.55249e-05
509	2.42077e-05	3.63248e-06	1.39201e-05
510	2.64286e-05	3.63248e-06	1.50305e-05
511	2.62065e-05	3.63248e-06	1.49195e-05
512	2.59844e-05	3.63248e-06	1.48084e-05
513	2.66507e-05	3.63248e-06	1.51416e-05
514	2.66507e-05	3.63248e-06	1.51416e-05
515	2.62065e-05	3.63248e-06	1.49195e-05
516	2.62065e-05	3.63248e-06	1.49195e-05
517	2.15426e-05	3.63248e-06	1.25876e-05
518	2.15426e-05	2.42166e-06	1.19821e-05
519	2.15426e-05	2.42166e-06	1.19821e-05
520	2.10985e-05	2.42166e-06	1.17601e-05
521	1.62125e-05	2.42166e-06	9.31708e-06
522	1.71009e-05	2.42166e-06	9.76125e-06
523	1.37695e-05	2.42166e-06	8.09559e-06
524	1.62125e-05	1.21083e-06	8.71166e-06
525	1.66567e-05	1.21083e-06	8.93375e-06
526	1.64346e-05	1.21083e-06	8.82271e-06
527	1.59904e-05	2.42166e-06	9.20603e-06
528	1.90997e-05	4.84331e-06	1.19715e-05
529	1.90997e-05	4.84331e-06	1.19715e-05
530	1.86555e-05	4.84331e-06	1.17494e-05
531	1.86555e-05	4.84331e-06	1.17494e-05
532	1.88776e-05	4.84331e-06	1.18604e-05
533	1.88776e-05	4.84331e-06	1.18604e-05
534	1.86555e-05	4.84331e-06	1.17494e-05
535	1.77671e-05	6.05414e-06	1.19106e-05
536	2.59844e-05	8.4758e-06	1.72301e-05
537	2.62065e-05	8.4758e-06	1.73411e-05
538	2.64286e-05	8.4758e-06	1.74522e-05
539	2.4874e-05	7.26497e-06	1.60695e-05
540	4.39736e-05	2.30057e-05	3.34897e-05
541	4.44178e-05	2.30057e-05	3.37118e-05
542	4.46399e-05	2.30057e-05	3.38228e-05
543	4.46399e-05	2.30057e-05	3.38228e-05
544	4.44178e-05	2.30057e-05	3.37118e-05
545	4.33073e-05	2.30057e-05	3.31565e-05
546	4.50841e-05	2.30057e-05	3.40449e-05
547	4.50841e-05	2.30057e-05	3.40449e-05
548	4.4862e-05	2.30057e-05	3.39339e-05
549	4.4862e-05	2.30057e-05	3.39339e-05
550	4.4862e-05	2.30057e-05	3.39339e-05
551	4.4862e-05	2.30057e-05	3.39339e-05
552	4.4862e-05	2.30057e-05	3.39339e-05
553	4.39736e-05	2.30057e-05	3.34897e-05
554	4.39736e-05	2.30057e-05	3.34897e-05
555	3.97539e-05	2.17949e-05	3.07744e-05
556	3.97539e-05	2.17949e-05	3.07744e-05
557	3.97539e-05	2.17949e-05	3.07744e-05
558	3.97539e-05	2.17949e-05	3.07744e-05
559	3.64226e-05	2.05841e-05	2.85033e-05
560	1.31032e-05	1.33191e-05	1.32112e-05
561	1.31032e-05	1.33191e-05	1.32112e-05
562	1.2437e-05	1.08975e-05	1.16672e-05
563	6.21849e-06	3.63248e-06	4.92549e-06
564	6.66267e-06	2.42166e-06	4.54216e-06
565	4.88596e-06	2.42166e-06	3.65381e-06
566	5.10805e-06	2.42166e-06	3.76485e-06
567	4.88596e-06	2.42166e-06	3.65381e-06
568	4.88596e-06	1.21083e-06	3.04839e-06
569	5.10805e-06	1.21083e-06	3.15944e-06
570	4.88596e-06	1.21083e-06	3.04839e-06
571	4.44178e-06	1.21083e-06	2.8263e-06
572	4.44178e-06	1.21083e-06	2.8263e-06
573	6.44058e-06	1.21083e-06	3.8257e-06
574	6.88476e-06	1.21083e-06	4.04779e-06
575	7.10685e-06	1.21083e-06	4.15884e-06
576	1.17707e-05	0	5.88536e-06
577	1.17707e-05	0	5.88536e-06
578	1.13265e-05	0	5.66327e-06
579	1.35474e-05	0	6.77371e-06
580	1.37695e-05	0	6.88476e-06
581	1.37695e-05	0	6.88476e-06
582	1.39916e-05	0	6.9958e-06
583	1.42137e-05	0	7.10685e-06
584	1.42137e-05	0	7.10685e-06
585	1.44358e-05	0	7.21789e-06
586	1.35474e-05	0	6.77371e-06
587	3.06483e-05	3.63248e-06	1.71404e-05
588	3.19808e-05	3.63248e-06	1.78066e-05
589	3.62005e-05	3.63248e-06	1.99165e-05
590	4.64166e-05	8.4758e-06	2.74462e-05
591	4.66387e-05	8.4758e-06	2.75572e-05
592	5.19688e-05	1.08975e-05	3.14331e-05
593	5.15246e-05	1.08975e-05	3.1211e-05
594	5.17467e-05	1.08975e-05	3.13221e-05
595	4.86375e-05	1.08975e-05	2.97675e-05
596	5.01921e-05	1.08975e-05	3.05448e-05
597	4.97479e-05	1.08975e-05	3.03227e-05
598	4.86375e-05	1.08975e-05	2.97675e-05
599	6.17407e-05	1.21083e-05	3.69245e-05
600	6.19628e-05	1.21083e-05	3.70356e-05
601	6.21849e-05	1.21083e-05	3.71466e-05
602	6.21849e-05	1.21083e-05	3.71466e-05
603	6.2407e-05	1.21083e-05	3.72576e-05
604	6.26291e-05	1.21083e-05	3.73687e-05
605	5.92978e-05	1.21083e-05	3.5703e-05
606	6.46279e-05	1.21083e-05	3.83681e-05
607	6.41837e-05	1.21083e-05	3.8146e-05
608	6.485e-05	1.21083e-05	3.84791e-05
609	6.39616e-05	1.21083e-05	3.8035e-05
610	6.55162e-05	1.21083e-05	3.88123e-05
611	4.88596e-05	4.84331e-06	2.68514e-05
612	5.59664e-05	8.4758e-06	3.22211e-05
613	5.61885e-05	8.4758e-06	3.23322e-05
614	5.57443e-05	8.4758e-06	3.21101e-05
615	5.61885e-05	8.4758e-06	3.23322e-05
616	5.59664e-05	8.4758e-06	3.22211e-05
617	5.59664e-05	8.4758e-06	3.22211e-05
618	3.2425e-05	7.26497e-06	1.9845e-05
619	3.46459e-05	7.26497e-06	2.09554e-05
620	3.37575e-05	7.26497e-06	2.05112e-05
621	3.10925e-05	7.26497e-06	1.91787e-05
622	4.4862e-05	1.21083e-05	2.84851e-05
623	4.55282e-05	1.21083e-05	2.88183e-05
624	4.57503e-05	1.21083e-05	2.89293e-05
625	4.55282e-05	1.21083e-05	2.88183e-05
626	4.50841e-05	1.08975e-05	2.79908e-05
627	4.50841e-05	1.08975e-05	2.79908e-05
628	4.50841e-05	1.08975e-05	2.79908e-05
629	4.15306e-05	1.08975e-05	2.6214e-05
630	4.17527e-05	1.08975e-05	2.63251e-05
631	4.08644e-05	1.08975e-05	2.58809e-05
632	3.55342e-05	7.26497e-06	2.13996e-05
633	5.57443e-05	1.33191e-05	3.45317e-05
634	5.59664e-05	1.33191e-05	3.46428e-05
635	5.79652e-05	1.33191e-05	3.56422e-05
636	5.57443e-05	1.21083e-05	3.39263e-05
637	5.95198e-05	1.69516e-05	3.82357e-05
638	6.08524e-05	1.69516e-05	3.8902e-05
639	6.04082e-05	1.69516e-05	3.86799e-05
640	5.9964e-05	1.69516e-05	3.84578e-05
641	4.997e-05	1.45299e-05	3.225e-05
642	5.13026e-05	1.45299e-05	3.29162e-05
643	5.13026e-05	1.45299e-05	3.29162e-05
644	5.13026e-05	1.45299e-05	3.29162e-05
645	5.13026e-05	1.45299e-05	3.29162e-05
646	5.13026e-05	1.45299e-05	3.29162e-05
647	5.10805e-05	1.45299e-05	3.28052e-05
648	5.10805e-05	1.45299e-05	3.28052e-05
649	5.08584e-05	1.45299e-05	3.26942e-05
650	5.08584e-05	1.45299e-05	3.26942e-05
651	5.08584e-05	1.45299e-05	3.26942e-05
652	3.10925e-05	9.68663e-06	2.03895e-05
653	3.22029e-05	1.08975e-05	2.15502e-05
654	3.19808e-05	1.08975e-05	2.14391e-05
655	3.19808e-05	1.08975e-05	2.14391e-05
656	3.13145e-05	1.08975e-05	2.1106e-05
657	8.88356e-06	1.21083e-06	5.04719e-06
658	1.37695e-05	4.84331e-06	9.30641e-06
659	1.57683e-05	6.05414e-06	1.09112e-05
660	1.55462e-05	6.05414e-06	1.08002e-05
661	1.55462e-05	6.05414e-06	1.08002e-05
662	1.57683e-05	6.05414e-06	1.09112e-05
663	1.26591e-05	6.05414e-06	9.35661e-06
664	1.42137e-05	6.05414e-06	1.01339e-05
665	1.42137e-05	6.05414e-06	1.01339e-05
666	1.42137e-05	6.05414e-06	1.01339e-05
667	1.44358e-05	6.05414e-06	1.0245e-05
668	1.44358e-05	6.05414e-06	1.0245e-05
669	1.44358e-05	6.05414e-06	1.0245e-05
670	1.39916e-05	6.05414e-06	1.00229e-05
671	1.39916e-05	6.05414e-06	1.00229e-05
672	1.37695e-05	6.05414e-06	9.91183e-06
673	1.37695e-05	6.05414e-06	9.91183e-06
674	1.17707e-05	4.84331e-06	8.30701e-06
675	1.17707e-05	4.84331e-06	8.30701e-06
676	1.15486e-05	4.84331e-06	8.19597e-06
677	1.15486e-05	4.84331e-06	8.19597e-06
678	1.15486e-05	4.84331e-06	8.19597e-06
679	7.55102e-06	3.63248e-06	5.59175e-06
680	8.66147e-06	2.42166e-06	5.54156e-06
681	8.88356e-06	2.42166e-06	5.65261e-06
682	8.88356e-06	2.42166e-06	5.65261e-06
683	6.21849e-06	2.42166e-06	4.32007e-06
684	6.88476e-06	1.21083e-06	4.04779e-06
685	6.88476e-06	1.21083e-06	4.04779e-06
686	5.55222e-06	1.21083e-06	3.38153e-06
687	5.55222e-06	0	2.77611e-06
688	5.55222e-06	0	2.77611e-06
689	5.33014e-06	0	2.66507e-06
690	5.10805e-06	0	2.55402e-06
691	5.10805e-06	0	2.55402e-06
692	5.10805e-06	0	2.55402e-06
693	3.33133e-06	0	1.66567e-06
694	3.33133e-06	0	1.66567e-06
695	3.33133e-06	0	1.66567e-06
696	4.21969e-06	1.21083e-06	2.71526e-06
697	4.21969e-06	1.21083e-06	2.71526e-06
698	4.21969e-06	1.21083e-06	2.71526e-06
699	4.21969e-06	1.21083e-06	2.71526e-06
700	4.21969e-06	1.21083e-06	2.71526e-06
701	4.21969e-06	1.21083e-06	2.71526e-06
702	1.9988e-06	1.21083e-06	1.60481e-06
703	4.66387e-06	2.42166e-06	3.54276e-06
704	4.44178e-06	2.42166e-06	3.43172e-06
705	3.9976e-06	2.42166e-06	3.20963e-06
706	5.10805e-06	2.42166e-06	3.76485e-06
707	5.10805e-06	2.42166e-06	3.76485e-06
708	5.10805e-06	2.42166e-06	3.76485e-06
709	5.10805e-06	2.42166e-06	3.76485e-06
710	5.33014e-06	2.42166e-06	3.8759e-06
711	5.33014e-06	2.42166e-06	3.8759e-06
712	5.33014e-06	2.42166e-06	3.8759e-06
713	5.55222e-06	2.42166e-06	3.98694e-06
714	5.55222e-06	2.42166e-06	3.98694e-06
715	6.44058e-06	2.42166e-06	4.43112e-06
716	6.44058e-06	2.42166e-06	4.43112e-06
717	6.44058e-06	2.42166e-06	4.43112e-06
718	6.44058e-06	2.42166e-06	4.43112e-06
719	6.21849e-06	2.42166e-06	4.32007e-06
720	6.21849e-06	2.42166e-06	4.32007e-06
721	6.21849e-06	2.42166e-06	4.32007e-06
722	6.21849e-06	2.42166e-06	4.32007e-06
723	6.21849e-06	2.42166e-06	4.32007e-06
724	5.10805e-06	2.42166e-06	3.76485e-06
725	3.55342e-06	2.42166e-06	2.98754e-06
726	3.55342e-06	2.42166e-06	2.98754e-06
727	3.10925e-06	2.42166e-06	2.76545e-06
728	3.10925e-06	1.21083e-06	2.16004e-06
729	2.88716e-06	1.21083e-06	2.04899e-06
730	2.88716e-06	1.21083e-06	2.04899e-06
731	2.88716e-06	1.21083e-06	2.04899e-06
732	2.66507e-06	1.21083e-06	1.93795e-06
733	2.66507e-06	1.21083e-06	1.93795e-06
734	2.88716e-06	1.21083e-06	2.04899e-06
735	2.88716e-06	1.21083e-06	2.04899e-06
736	2.88716e-06	1.21083e-06	2.04899e-06
737	2.88716e-06	1.21083e-06	2.04899e-06
738	2.88716e-06	1.21083e-06	2.04899e-06
739	2.88716e-06	1.21083e-06	2.04899e-06
740	2.88716e-06	1.21083e-06	2.04899e-06
741	2.22089e-06	1.21083e-06	1.71586e-06
742	6.66267e-07	0	3.33133e-07
743	1.33253e-06	0	6.66267e-07
744	1.11044e-06	0	5.55222e-07
745	1.33253e-06	0	6.66267e-07
746	1.33253e-06	0	6.66267e-07
747	1.33253e-06	0	6.66267e-07
748	1.33253e-06	0	6.66267e-07
749	1.33253e-06	0	6.66267e-07
750	1.33253e-06	0	6.66267e-07
751	1.33253e-06	0	6.66267e-07
752	1.33253e-06	0	6.66267e-07
753	1.33253e-06	0	6.66267e-07
754	1.33253e-06	0	6.66267e-07
755	1.33253e-06	0	6.66267e-07
756	1.33253e-06	0	6.66267e-07
757	1.33253e-06	0	6.66267e-07
758	1.33253e-06	0	6.66267e-07
759	1.33253e-06	0	6.66267e-07
760	1.33253e-06	0	6.66267e-07
761	1.55462e-06	0	7.77311e-07
762	1.55462e-06	0	7.77311e-07
763	1.55462e-06	0	7.77311e-07
764	1.55462e-06	0	7.77311e-07
765	1.55462e-06	0	7.77311e-07
766	1.55462e-06	0	7.77311e-07
767	1.33253e-06	0	6.66267e-07
768	1.33253e-06	0	6.66267e-07
769	1.33253e-06	0	6.66267e-07
770	1.33253e-06	0	6.66267e-07
771	1.33253e-06	0	6.66267e-07
772	1.33253e-06	0	6.66267e-07
773	1.33253e-06	0	6.66267e-07
774	1.33253e-06	0	6.66267e-07
775	1.33253e-06	0	6.66267e-07
776	2.66507e-06	0	1.33253e-06
777	2.66507e-06	0	1.33253e-06
778	2.66507e-06	0	1.33253e-06
779	2.66507e-06	0	1.33253e-06
780	2.66507e-06	0	1.33253e-06
781	2.66507e-06	0	1.33253e-06
782	2.66507e-06	0	1.33253e-06
783	2.66507e-06	0	1.33253e-06
784	2.88716e-06	0	1.44358e-06
785	2.88716e-06	0	1.44358e-06
786	3.10925e-06	0	1.55462e-06
787	3.10925e-06	0	1.55462e-06
788	3.33133e-06	0	1.66567e-06
789	3.33133e-06	0	1.66567e-06
790	3.33133e-06	0	1.66567e-06
791	3.10925e-06	0	1.55462e-06
792	3.33133e-06	0	1.66567e-06
793	2.66507e-06	0	1.33253e-06
794	6.44058e-06	0	3.22029e-06
795	6.66267e-06	0	3.33133e-06
796	2.86495e-05	7.26497e-06	1.79572e-05
797	3.59784e-05	9.68663e-06	2.28325e-05
798	3.73109e-05	1.08975e-05	2.41042e-05
799	3.86435e-05	1.08975e-05	2.47705e-05
800	3.86435e-05	1.08975e-05	2.47705e-05
801	3.90877e-05	1.08975e-05	2.49926e-05
802	3.93097e-05	1.08975e-05	2.51036e-05
803	3.95318e-05	1.08975e-05	2.52146e-05
804	3.95318e-05	1.08975e-05	2.52146e-05
805	3.97539e-05	1.08975e-05	2.53257e-05
806	3.97539e-05	1.08975e-05	2.53257e-05
807	3.97539e-05	1.08975e-05	2.53257e-05
808	3.97539e-05	1.08975e-05	2.53257e-05
809	5.01921e-05	1.21083e-05	3.11502e-05
810	5.06363e-05	1.21083e-05	3.13723e-05
811	5.08584e-05	1.21083e-05	3.14833e-05
812	5.08584e-05	1.21083e-05	3.14833e-05
813	5.17467e-05	1.21083e-05	3.19275e-05
814	5.17467e-05	1.21083e-05	3.19275e-05
815	5.17467e-05	1.21083e-05	3.19275e-05
816	5.17467e-05	1.21083e-05	3.19275e-05
817	4.10865e-05	1.08975e-05	2.5992e-05
818	3.77551e-05	9.68663e-06	2.37209e-05
819	2.2431e-05	2.42166e-06	1.24263e-05
820	2.26531e-05	3.63248e-06	1.31428e-05
821	2.28752e-05	3.63248e-06	1.32538e-05
822	2.28752e-05	3.63248e-06	1.32538e-05
823	2.28752e-05	3.63248e-06	1.32538e-05
824	2.08764e-05	3.63248e-06	1.22544e-05
825	1.73229e-05	2.42166e-06	9.8723e-06
826	1.7545e-05	2.42166e-06	9.98334e-06
827	1.7545e-05	2.42166e-06	9.98334e-06
828	1.15486e-05	2.42166e-06	6.98514e-06
829	4.66387e-06	1.21083e-06	2.93735e-06
830	4.88596e-06	1.21083e-06	3.04839e-06
831	5.10805e-06	1.21083e-06	3.15944e-06
832	5.10805e-06	1.21083e-06	3.15944e-06
833	5.10805e-06	2.42166e-06	3.76485e-06
834	4.88596e-06	2.42166e-06	3.65381e-06
835	2.88716e-06	2.42166e-06	2.65441e-06
836	4.44178e-06	6.05414e-06	5.24796e-06
837	4.66387e-06	6.05414e-06	5.359e-06
838	5.10805e-06	6.05414e-06	5.58109e-06
839	5.33014e-06	4.84331e-06	5.08672e-06
840	4.88596e-06	4.84331e-06	4.86464e-06
841	7.32894e-06	6.05414e-06	6.69154e-06
842	7.32894e-06	6.05414e-06	6.69154e-06
843	1.31032e-05	6.05414e-06	9.5787e-06
844	1.37695e-05	6.05414e-06	9.91183e-06
845	1.35474e-05	6.05414e-06	9.80078e-06
846	1.35474e-05	6.05414e-06	9.80078e-06
847	1.33253e-05	6.05414e-06	9.68974e-06
848	1.59904e-05	6.05414e-06	1.10223e-05
849	1.59904e-05	6.05414e-06	1.10223e-05
850	1.59904e-05	6.05414e-06	1.10223e-05
851	1.59904e-05	6.05414e-06	1.10223e-05
852	1.59904e-05	6.05414e-06	1.10223e-05
853	1.62125e-05	6.05414e-06	1.11333e-05
854	1.62125e-05	6.05414e-06	1.11333e-05
855	1.59904e-05	6.05414e-06	1.10223e-05
856	1.39916e-05	3.63248e-06	8.81204e-06
857	1.39916e-05	3.63248e-06	8.81204e-06
858	1.39916e-05	3.63248e-06	8.81204e-06
859	1.39916e-05	2.42166e-06	8.20663e-06
860	1.39916e-05	2.42166e-06	8.20663e-06
861	1.37695e-05	2.42166e-06	8.09559e-06
862	5.55222e-06	1.21083e-06	3.38153e-06
863	5.77431e-06	1.21083e-06	3.49257e-06
864	5.77431e-06	1.21083e-06	3.49257e-06
865	5.77431e-06	1.21083e-06	3.49257e-06
866	5.33014e-06	1.21083e-06	3.27048e-06
867	5.77431e-06	1.21083e-06	3.49257e-06
868	5.77431e-06	1.21083e-06	3.49257e-06
869	4.21969e-06	1.21083e-06	2.71526e-06
870	4.21969e-06	0	2.10985e-06
871	3.77551e-06	0	1.88776e-06
872	4.88596e-06	0	2.44298e-06
873	4.88596e-06	0	2.44298e-06
874	4.21969e-06	0	2.10985e-06
875	5.10805e-06	0	2.55402e-06
876	5.10805e-06	0	2.55402e-06
877	5.10805e-06	0	2.55402e-06
878	5.10805e-06	0	2.55402e-06
879	4.21969e-06	0	2.10985e-06
880	4.21969e-06	0	2.10985e-06
881	3.55342e-06	0	1.77671e-06
882	3.77551e-06	0	1.88776e-06
883	3.77551e-06	0	1.88776e-06
884	4.21969e-06	0	2.10985e-06
885	5.55222e-06	0	2.77611e-06
886	5.77431e-06	0	2.88716e-06
887	6.21849e-06	0	3.10925e-06
888	5.55222e-06	0	2.77611e-06
889	7.9952e-06	1.21083e-06	4.60302e-06
890	7.9952e-06	1.21083e-06	4.60302e-06
891	7.9952e-06	1.21083e-06	4.60302e-06
892	8.21729e-06	1.21083e-06	4.71406e-06
893	7.9952e-06	1.21083e-06	4.60302e-06
894	8.43938e-06	1.21083e-06	4.8251e-06
895	8.43938e-06	1.21083e-06	4.8251e-06
896	8.21729e-06	1.21083e-06	4.71406e-06
897	1.64346e-05	1.21083e-05	1.42714e-05
898	1.66567e-05	1.45299e-05	1.55933e-05
899	1.66567e-05	1.45299e-05	1.55933e-05
900	1.66567e-05	1.45299e-05	1.55933e-05
901	1.68788e-05	1.69516e-05	1.69152e-05
902	1.64346e-05	1.69516e-05	1.66931e-05
903	2.06543e-05	2.42166e-05	2.24354e-05
904	2.15426e-05	2.42166e-05	2.28796e-05
905	2.33193e-05	2.42166e-05	2.3768e-05
906	2.37635e-05	2.42166e-05	2.399e-05
907	2.39856e-05	2.42166e-05	2.41011e-05
908	2.30973e-05	2.42166e-05	2.36569e-05
909	5.28572e-05	3.26924e-05	4.27748e-05
910	5.59664e-05	3.26924e-05	4.43294e-05
911	5.61885e-05	3.26924e-05	4.44404e-05
912	5.79652e-05	3.26924e-05	4.53288e-05
913	5.84094e-05	3.26924e-05	4.55509e-05
914	5.70769e-05	3.26924e-05	4.48846e-05
915	6.28512e-05	3.39032e-05	4.83772e-05
916	6.39616e-05	3.39032e-05	4.89324e-05
917	6.10745e-05	3.02707e-05	4.56726e-05
918	7.43998e-05	3.75357e-05	5.59677e-05
919	7.39556e-05	3.75357e-05	5.57457e-05
920	7.39556e-05	3.75357e-05	5.57457e-05
921	7.39556e-05	3.75357e-05	5.57457e-05
922	7.32894e-05	3.39032e-05	5.35963e-05
923	7.32894e-05	3.39032e-05	5.35963e-05
924	7.32894e-05	3.39032e-05	5.35963e-05
925	7.30673e-05	3.39032e-05	5.34852e-05
926	7.28452e-05	3.26924e-05	5.27688e-05
927	7.28452e-05	3.26924e-05	5.27688e-05
928	7.26231e-05	3.26924e-05	5.26577e-05
929	6.485e-05	3.02707e-05	4.75603e-05
930	6.21849e-05	2.90599e-05	4.56224e-05
931	6.08524e-05	2.42166e-05	4.25345e-05
932	4.86375e-05	1.81624e-05	3.34e-05
933	2.55402e-05	9.68663e-06	1.76134e-05
934	2.90937e-05	1.21083e-05	2.0601e-05
935	2.90937e-05	1.21083e-05	2.0601e-05
936	2.70949e-05	1.21083e-05	1.96016e-05
937	2.62065e-05	1.33191e-05	1.97628e-05
938	1.53241e-05	1.08975e-05	1.31108e-05
939	2.37635e-05	2.05841e-05	2.21738e-05
940	2.37635e-05	2.17949e-05	2.27792e-05
941	2.33193e-05	2.05841e-05	2.19517e-05
942	2.37635e-05	2.05841e-05	2.21738e-05
943	2.37635e-05	2.05841e-05	2.21738e-05
944	1.73229e-05	1.93733e-05	1.83481e-05
945	1.79892e-05	1.93733e-05	1.86812e-05
946	1.79892e-05	1.93733e-05	1.86812e-05
947	1.53241e-05	1.93733e-05	1.73487e-05
948	1.64346e-05	1.93733e-05	1.79039e-05
949	1.64346e-05	1.93733e-05	1.79039e-05
950	1.64346e-05	1.93733e-05	1.79039e-05
951	1.59904e-05	1.69516e-05	1.6471e-05
952	1.64346e-05	1.69516e-05	1.66931e-05
953	1.64346e-05	1.69516e-05	1.66931e-05
954	1.64346e-05	1.69516e-05	1.66931e-05
955	1.62125e-05	1.69516e-05	1.6582e-05
956	1.57683e-05	1.69516e-05	1.636e-05
957	1.55462e-05	1.57408e-05	1.56435e-05
958	1.04382e-05	4.84331e-06	7.64075e-06
959	8.21729e-06	2.42166e-06	5.31947e-06
960	8.43938e-06	1.21083e-06	4.8251e-06
961	8.43938e-06	1.21083e-06	4.8251e-06
962	4.44178e-06	1.21083e-06	2.8263e-06
963	5.10805e-06	1.21083e-06	3.15944e-06
964	5.10805e-06	1.21083e-06	3.15944e-06
965	3.9976e-06	1.21083e-06	2.60421e-06
966	4.66387e-06	2.42166e-06	3.54276e-06
967	4.44178e-06	2.42166e-06	3.43172e-06
968	3.9976e-06	2.42166e-06	3.20963e-06
969	4.44178e-06	3.63248e-06	4.03713e-06
970	4.44178e-06	3.63248e-06	4.03713e-06
971	4.44178e-06	3.63248e-06	4.03713e-06
972	4.44178e-06	3.63248e-06	4.03713e-06
973	4.44178e-06	3.63248e-06	4.03713e-06
974	4.44178e-06	3.63248e-06	4.03713e-06
975	4.44178e-06	3.63248e-06	4.03713e-06
976	4.44178e-06	3.63248e-06	4.03713e-06
977	3.77551e-06	3.63248e-06	3.704e-06
978	3.77551e-06	3.63248e-06	3.704e-06
979	3.77551e-06	3.63248e-06	3.704e-06
980	3.77551e-06	3.63248e-06	3.704e-06
981	3.55342e-06	3.63248e-06	3.59295e-06
982	3.55342e-06	3.63248e-06	3.59295e-06
983	2.66507e-06	2.42166e-06	2.54336e-06
984	2.66507e-06	2.42166e-06	2.54336e-06
985	2.66507e-06	2.42166e-06	2.54336e-06
986	2.44298e-06	2.42166e-06	2.43232e-06
987	2.44298e-06	2.42166e-06	2.43232e-06
988	2.44298e-06	2.42166e-06	2.43232e-06
989	2.44298e-06	2.42166e-06	2.43232e-06
990	2.22089e-06	2.42166e-06	2.32127e-06
991	1.77671e-06	2.42166e-06	2.09918e-06
992	4.44178e-07	1.21083e-06	8.27503e-07
993	4.44178e-07	1.21083e-06	8.27503e-07
994	4.44178e-07	1.21083e-06	8.27503e-07
995	2.22089e-07	1.21083e-06	7.16459e-07
996	4.44178e-07	1.21083e-06	8.27503e-07
997	2.22089e-07	1.21083e-06	7.16459e-07
998	2.22089e-07	1.21083e-06	7.16459e-07
999	2.22089e-07	1.21083e-06	7.16459e-07
1000	2.22089e-07	1.21083e-06	7.16459e-07
1001	2.22089e-07	1.21083e-06	7.16459e-07
1002	2.22089e-07	1.21083e-06	7.16459e-07
1003	2.22089e-07	1.21083e-06	7.16459e-07
1004	2.22089e-07	1.21083e-06	7.16459e-07
1005	4.44178e-07	1.21083e-06	8.27503e-07
1006	4.44178e-07	1.21083e-06	8.27503e-07
1007	4.44178e-07	1.21083e-06	8.27503e-07
1008	4.44178e-07	1.21083e-06	8.27503e-07
1009	6.66267e-07	1.21083e-06	9.38548e-07
1010	6.66267e-07	1.21083e-06	9.38548e-07
1011	1.11044e-06	1.21083e-06	1.16064e-06
1012	1.11044e-06	1.21083e-06	1.16064e-06
1013	1.11044e-06	1.21083e-06	1.16064e-06
1014	1.11044e-06	1.21083e-06	1.16064e-06
1015	1.11044e-06	1.21083e-06	1.16064e-06
1016	1.33253e-06	1.21083e-06	1.27168e-06
1017	1.33253e-06	1.21083e-06	1.27168e-06
1018	1.33253e-06	1.21083e-06	1.27168e-06
1019	1.33253e-06	1.21083e-06	1.27168e-06
1020	1.33253e-06	1.21083e-06	1.27168e-06
1021	1.33253e-06	1.21083e-06	1.27168e-06
1022	1.33253e-06	0	6.66267e-07
1023	1.33253e-06	0	6.66267e-07
1024	1.33253e-06	0	6.66267e-07
1025	1.55462e-06	0	7.77311e-07
1026	1.55462e-06	0	7.77311e-07
1027	1.55462e-06	0	7.77311e-07
1028	1.55462e-06	0	7.77311e-07
1029	1.33253e-06	0	6.66267e-07
1030	1.33253e-06	0	6.66267e-07
1031	1.33253e-06	0	6.66267e-07
1032	1.33253e-06	0	6.66267e-07
1033	1.55462e-06	0	7.77311e-07
1034	1.55462e-06	0	7.77311e-07
1035	1.55462e-06	0	7.77311e-07
1036	1.11044e-06	0	5.55222e-07
1037	3.10925e-06	1.21083e-06	2.16004e-06
1038	3.10925e-06	1.21083e-06	2.16004e-06
1039	3.55342e-06	1.21083e-06	2.38213e-06
1040	3.55342e-06	1.21083e-06	2.38213e-06
1041	3.9976e-06	1.21083e-06	2.60421e-06
1042	4.66387e-06	1.21083e-06	2.93735e-06
1043	4.66387e-06	1.21083e-06	2.93735e-06
1044	1.26591e-05	9.68663e-06	1.11728e-05
1045	1.28812e-05	9.68663e-06	1.12839e-05
1046	1.31032e-05	9.68663e-06	1.13949e-05
1047	1.33253e-05	9.68663e-06	1.1506e-05
1048	1.33253e-05	9.68663e-06	1.1506e-05
1049	1.33253e-05	1.08975e-05	1.21114e-05
1050	1.33253e-05	1.08975e-05	1.21114e-05
1051	1.33253e-05	1.08975e-05	1.21114e-05
1052	1.33253e-05	1.08975e-05	1.21114e-05
1053	1.28812e-05	1.08975e-05	1.18893e-05
1054	1.35474e-05	1.08975e-05	1.22224e-05
1055	1.35474e-05	1.08975e-05	1.22224e-05
1056	1.28812e-05	1.08975e-05	1.18893e-05
1057	2.55402e-05	2.54274e-05	2.54838e-05
1058	2.7539e-05	2.54274e-05	2.64832e-05
1059	2.79832e-05	3.02707e-05	2.9127e-05
1060	4.70829e-05	5.81198e-05	5.26013e-05
1061	4.7527e-05	5.93306e-05	5.34288e-05
1062	4.77491e-05	5.93306e-05	5.35399e-05
1063	4.77491e-05	5.93306e-05	5.35399e-05
1064	4.79712e-05	5.93306e-05	5.36509e-05
1065	4.79712e-05	5.93306e-05	5.36509e-05
1066	4.79712e-05	5.93306e-05	5.36509e-05
1067	4.70829e-05	5.81198e-05	5.26013e-05
1068	4.55282e-05	5.81198e-05	5.1824e-05
1069	4.53061e-05	5.81198e-05	5.1713e-05
1070	4.37515e-05	5.56981e-05	4.97248e-05
1071	4.7527e-05	5.81198e-05	5.28234e-05
1072	4.77491e-05	5.81198e-05	5.29344e-05
1073	4.79712e-05	5.81198e-05	5.30455e-05
1074	4.84154e-05	5.81198e-05	5.32676e-05
1075	4.70829e-05	5.69089e-05	5.19959e-05
1076	4.70829e-05	5.69089e-05	5.19959e-05
1077	4.70829e-05	5.69089e-05	5.19959e-05
1078	4.70829e-05	5.69089e-05	5.19959e-05
1079	4.70829e-05	5.56981e-05	5.13905e-05
1080	3.17587e-05	2.17949e-05	2.67768e-05
1081	3.22029e-05	2.30057e-05	2.76043e-05
1082	3.22029e-05	2.30057e-05	2.76043e-05
1083	3.22029e-05	2.17949e-05	2.69989e-05
1084	3.19808e-05	1.81624e-05	2.50716e-05
1085	2.66507e-05	9.68663e-06	1.81687e-05
1086	2.59844e-05	1.08975e-05	1.84409e-05
1087	1.84334e-05	6.05414e-06	1.22438e-05
1088	1.90997e-05	6.05414e-06	1.25769e-05
1089	1.88776e-05	6.05414e-06	1.24659e-05
1090	1.73229e-05	6.05414e-06	1.16885e-05
1091	1.06603e-05	4.84331e-06	7.75179e-06
1092	1.15486e-05	4.84331e-06	8.19597e-06
1093	1.13265e-05	4.84331e-06	8.08493e-06
1094	7.32894e-06	2.42166e-06	4.8753e-06
1095	7.55102e-06	2.42166e-06	4.98634e-06
1096	6.66267e-06	2.42166e-06	4.54216e-06
1097	7.77311e-06	2.42166e-06	5.09739e-06
1098	7.77311e-06	2.42166e-06	5.09739e-06
1099	7.77311e-06	2.42166e-06	5.09739e-06
1100	7.77311e-06	2.42166e-06	5.09739e-06
1101	9.10565e-06	2.42166e-06	5.76365e-06
1102	8.88356e-06	2.42166e-06	5.65261e-06
1103	8.88356e-06	2.42166e-06	5.65261e-06
1104	8.66147e-06	2.42166e-06	5.54156e-06
1105	7.55102e-06	2.42166e-06	4.98634e-06
1106	7.32894e-06	2.42166e-06	4.8753e-06
1107	5.10805e-06	2.42166e-06	3.76485e-06
1108	8.21729e-06	8.4758e-06	8.34654e-06
1109	7.9952e-06	1.21083e-05	1.00517e-05
1110	8.88356e-06	1.33191e-05	1.11013e-05
1111	1.15486e-05	1.69516e-05	1.42501e-05
1112	1.11044e-05	1.69516e-05	1.4028e-05
1113	1.88776e-05	3.26924e-05	2.5785e-05
1114	1.90997e-05	3.26924e-05	2.5896e-05
1115	1.9988e-05	3.26924e-05	2.63402e-05
1116	3.30913e-05	3.75357e-05	3.53135e-05
1117	3.30913e-05	3.75357e-05	3.53135e-05
1118	3.33133e-05	3.75357e-05	3.54245e-05
1119	3.33133e-05	3.75357e-05	3.54245e-05
1120	3.2425e-05	3.75357e-05	3.49803e-05
1121	5.68548e-05	4.84331e-05	5.2644e-05
1122	5.88536e-05	4.84331e-05	5.36434e-05
1123	6.37395e-05	5.20656e-05	5.79026e-05
1124	6.46279e-05	5.32764e-05	5.89522e-05
1125	7.66207e-05	6.90172e-05	7.2819e-05
1126	7.92858e-05	7.0228e-05	7.47569e-05
1127	7.86195e-05	7.0228e-05	7.44238e-05
1128	7.86195e-05	7.0228e-05	7.44238e-05
1129	7.86195e-05	7.0228e-05	7.44238e-05
1130	7.86195e-05	7.0228e-05	7.44238e-05
1131	7.86195e-05	6.90172e-05	7.38184e-05
1132	7.55102e-05	5.93306e-05	6.74204e-05
1133	7.30673e-05	5.69089e-05	6.49881e-05
1134	9.74971e-05	0.000122294	0.000109895
1135	0.00010527	0.000129559	0.000117414
1136	0.000105936	0.000130769	0.000118353
1137	0.000106825	0.000130769	0.000118797
1138	0.000107047	0.000130769	0.000118908
1139	0.000107269	0.000130769	0.000119019
1140	0.000105936	0.000130769	0.000118353
1141	0.000105936	0.000130769	0.000118353
1142	0.000104604	0.000125926	0.000115265
1143	8.30613e-05	0.000113818	9.84396e-05
1144	8.59484e-05	0.00011624	0.000101094
1145	8.61705e-05	0.00011624	0.000101205
1146	7.15126e-05	0.000107764	8.96382e-05
1147	7.17347e-05	0.000107764	8.97492e-05
1148	7.01801e-05	0.000107764	8.89719e-05
1149	7.06243e-05	0.000107764	8.9194e-05
1150	7.06243e-05	0.000107764	8.9194e-05
1151	6.95138e-05	0.000106553	8.80334e-05
1152	7.12906e-05	0.000106553	8.89217e-05
1153	7.12906e-05	0.000106553	8.89217e-05
1154	7.06243e-05	0.000106553	8.85886e-05
1155	7.04022e-05	0.000105342	8.78721e-05
1156	7.04022e-05	0.000105342	8.78721e-05
1157	6.81813e-05	9.92879e-05	8.37346e-05
1158	1.59904e-05	1.69516e-05	1.6471e-05
1159	1.66567e-05	1.57408e-05	1.61987e-05
1160	1.53241e-05	7.26497e-06	1.12946e-05
1161	1.08824e-05	6.05414e-06	8.46825e-06
1162	1.33253e-05	8.4758e-06	1.09006e-05
1163	1.33253e-05	8.4758e-06	1.09006e-05
1164	9.77191e-06	2.42166e-06	6.09679e-06
1165	1.04382e-05	3.63248e-06	7.03533e-06
1166	1.06603e-05	3.63248e-06	7.14638e-06
1167	1.11044e-05	3.63248e-06	7.36847e-06
1168	1.19928e-05	3.63248e-06	7.81264e-06
1169	1.19928e-05	3.63248e-06	7.81264e-06
1170	1.19928e-05	3.63248e-06	7.81264e-06
1171	9.994e-06	3.63248e-06	6.81324e-06
1172	1.17707e-05	3.63248e-06	7.7016e-06
1173	1.17707e-05	3.63248e-06	7.7016e-06
1174	1.17707e-05	3.63248e-06	7.7016e-06
1175	1.17707e-05	3.63248e-06	7.7016e-06
1176	1.17707e-05	3.63248e-06	7.7016e-06
1177	9.994e-06	3.63248e-06	6.81324e-06
1178	9.994e-06	3.63248e-06	6.81324e-06
1179	9.994e-06	3.63248e-06	6.81324e-06
1180	9.994e-06	3.63248e-06	6.81324e-06
1181	8.21729e-06	3.63248e-06	5.92489e-06
1182	8.43938e-06	3.63248e-06	6.03593e-06
1183	8.43938e-06	3.63248e-06	6.03593e-06
1184	8.43938e-06	3.63248e-06	6.03593e-06
1185	8.43938e-06	3.63248e-06	6.03593e-06
1186	6.88476e-06	3.63248e-06	5.25862e-06
1187	7.10685e-06	3.63248e-06	5.36967e-06
1188	7.10685e-06	3.63248e-06	5.36967e-06
1189	7.10685e-06	3.63248e-06	5.36967e-06
1190	4.88596e-06	3.63248e-06	4.25922e-06
1191	4.88596e-06	2.42166e-06	3.65381e-06
1192	4.88596e-06	2.42166e-06	3.65381e-06
1193	1.55462e-06	1.21083e-06	1.38273e-06
1194	1.55462e-06	0	7.77311e-07
1195	8.88356e-07	0	4.44178e-07
1196	1.11044e-06	0	5.55222e-07
1197	1.11044e-06	0	5.55222e-07
1198	1.33253e-06	0	6.66267e-07
1199	1.33253e-06	0	6.66267e-07
1200	1.33253e-06	0	6.66267e-07
1201	1.11044e-06	0	5.55222e-07
1202	8.88356e-07	0	4.44178e-07
1203	8.88356e-07	0	4.44178e-07
1204	8.88356e-07	0	4.44178e-07
1205	8.88356e-07	1.21083e-06	1.04959e-06
1206	1.11044e-06	1.21083e-06	1.16064e-06
1207	1.11044e-06	1.21083e-06	1.16064e-06
1208	1.11044e-06	1.21083e-06	1.16064e-06
1209	1.11044e-06	1.21083e-06	1.16064e-06
1210	1.11044e-06	1.21083e-06	1.16064e-06
1211	1.33253e-06	1.21083e-06	1.27168e-06
1212	1.33253e-06	1.21083e-06	1.27168e-06
1213	1.33253e-06	1.21083e-06	1.27168e-06
1214	8.88356e-07	1.21083e-06	1.04959e-06
1215	3.77551e-06	2.42166e-06	3.09858e-06
1216	3.77551e-06	2.42166e-06	3.09858e-06
1217	3.9976e-06	2.42166e-06	3.20963e-06
1218	3.9976e-06	2.42166e-06	3.20963e-06
1219	3.9976e-06	2.42166e-06	3.20963e-06
1220	3.9976e-06	2.42166e-06	3.20963e-06
1221	3.9976e-06	2.42166e-06	3.20963e-06
1222	3.9976e-06	2.42166e-06	3.20963e-06
1223	3.77551e-06	2.42166e-06	3.09858e-06
1224	3.77551e-06	2.42166e-06	3.09858e-06
1225	3.77551e-06	2.42166e-06	3.09858e-06
1226	4.44178e-06	2.42166e-06	3.43172e-06
1227	4.44178e-06	1.21083e-06	2.8263e-06
1228	1.39916e-05	6.05414e-06	1.00229e-05
1229	1.42137e-05	6.05414e-06	1.01339e-05
1230	1.59904e-05	6.05414e-06	1.10223e-05
1231	1.59904e-05	6.05414e-06	1.10223e-05
1232	1.59904e-05	6.05414e-06	1.10223e-05
1233	1.59904e-05	6.05414e-06	1.10223e-05
1234	1.5102e-05	4.84331e-06	9.97268e-06
1235	1.5102e-05	4.84331e-06	9.97268e-06
1236	1.5102e-05	4.84331e-06	9.97268e-06
1237	1.5102e-05	4.84331e-06	9.97268e-06
1238	1.35474e-05	4.84331e-06	9.19537e-06
1239	1.42137e-05	6.05414e-06	1.01339e-05
1240	1.42137e-05	6.05414e-06	1.01339e-05
1241	1.39916e-05	6.05414e-06	1.00229e-05
1242	1.39916e-05	6.05414e-06	1.00229e-05
1243	1.39916e-05	6.05414e-06	1.00229e-05
1244	1.39916e-05	6.05414e-06	1.00229e-05
1245	1.39916e-05	6.05414e-06	1.00229e-05
1246	1.39916e-05	6.05414e-06	1.00229e-05
1247	1.39916e-05	6.05414e-06	1.00229e-05
1248	1.39916e-05	6.05414e-06	1.00229e-05
1249	1.39916e-05	6.05414e-06	1.00229e-05
1250	3.33133e-06	1.21083e-06	2.27108e-06
1251	4.66387e-06	1.21083e-06	2.93735e-06
1252	4.66387e-06	1.21083e-06	2.93735e-06
1253	4.44178e-06	1.21083e-06	2.8263e-06
1254	3.55342e-06	1.21083e-06	2.38213e-06
1255	5.55222e-06	1.21083e-06	3.38153e-06
1256	5.55222e-06	1.21083e-06	3.38153e-06
1257	5.55222e-06	1.21083e-06	3.38153e-06
1258	5.10805e-06	1.21083e-06	3.15944e-06
1259	4.88596e-06	0	2.44298e-06
1260	5.9964e-06	0	2.9982e-06
1261	6.21849e-06	0	3.10925e-06
1262	5.77431e-06	0	2.88716e-06
1263	7.55102e-06	1.21083e-06	4.38093e-06
1264	7.77311e-06	1.21083e-06	4.49197e-06
1265	7.77311e-06	1.21083e-06	4.49197e-06
1266	7.77311e-06	1.21083e-06	4.49197e-06
1267	7.77311e-06	1.21083e-06	4.49197e-06
1268	7.77311e-06	1.21083e-06	4.49197e-06
1269	7.9952e-06	1.21083e-06	4.60302e-06
1270	7.9952e-06	1.21083e-06	4.60302e-06
1271	8.66147e-06	1.21083e-06	4.93615e-06
1272	8.66147e-06	1.21083e-06	4.93615e-06
1273	1.06603e-05	1.21083e-06	5.93555e-06
1274	1.06603e-05	1.21083e-06	5.93555e-06
1275	1.04382e-05	1.21083e-06	5.8245e-06
1276	1.04382e-05	1.21083e-06	5.8245e-06
1277	1.06603e-05	1.21083e-06	5.93555e-06
1278	9.32774e-06	1.21083e-06	5.26928e-06
1279	9.54983e-06	1.21083e-06	5.38033e-06
1280	8.88356e-06	1.21083e-06	5.04719e-06
1281	8.43938e-06	1.21083e-06	4.8251e-06
1282	2.17647e-05	2.54274e-05	2.35961e-05
1283	2.17647e-05	2.54274e-05	2.35961e-05
1284	1.95438e-05	2.42166e-05	2.18802e-05
1285	2.13205e-05	2.42166e-05	2.27686e-05
1286	2.10985e-05	2.66382e-05	2.38683e-05
1287	2.08764e-05	2.66382e-05	2.37573e-05
1288	2.08764e-05	2.66382e-05	2.37573e-05
1289	2.08764e-05	2.66382e-05	2.37573e-05
1290	2.08764e-05	2.66382e-05	2.37573e-05
1291	2.08764e-05	2.66382e-05	2.37573e-05
1292	2.10985e-05	2.66382e-05	2.38683e-05
1293	1.90997e-05	2.66382e-05	2.28689e-05
1294	2.02101e-05	2.7849e-05	2.40296e-05
1295	1.9988e-05	2.7849e-05	2.39185e-05
1296	2.53181e-05	2.7849e-05	2.65836e-05
1297	2.55402e-05	2.7849e-05	2.66946e-05
1298	2.55402e-05	2.7849e-05	2.66946e-05
1299	2.55402e-05	2.7849e-05	2.66946e-05
1300	2.46519e-05	2.7849e-05	2.62505e-05
1301	4.77491e-05	5.56981e-05	5.17236e-05
1302	4.79712e-05	5.56981e-05	5.18347e-05
1303	4.79712e-05	5.56981e-05	5.18347e-05
1304	4.79712e-05	5.56981e-05	5.18347e-05
1305	4.77491e-05	5.56981e-05	5.17236e-05
1306	3.79772e-05	3.87465e-05	3.83619e-05
1307	3.4868e-05	3.5114e-05	3.4991e-05
1308	4.79712e-05	3.63248e-05	4.2148e-05
1309	4.81933e-05	3.63248e-05	4.22591e-05
1310	4.84154e-05	3.63248e-05	4.23701e-05
1311	4.84154e-05	3.63248e-05	4.23701e-05
1312	4.84154e-05	3.63248e-05	4.23701e-05
1313	4.81933e-05	3.63248e-05	4.22591e-05
1314	4.81933e-05	3.63248e-05	4.22591e-05
1315	4.7527e-05	3.63248e-05	4.19259e-05
1316	4.77491e-05	3.63248e-05	4.2037e-05
1317	4.7527e-05	3.39032e-05	4.07151e-05
1318	4.64166e-05	3.39032e-05	4.01599e-05
1319	4.57503e-05	3.39032e-05	3.98268e-05
1320	3.7533e-05	2.17949e-05	2.9664e-05
1321	4.2419e-05	2.17949e-05	3.2107e-05
1322	3.93097e-05	2.05841e-05	2.99469e-05
1323	3.88656e-05	2.05841e-05	2.97248e-05
1324	3.88656e-05	2.05841e-05	2.97248e-05
1325	3.88656e-05	2.05841e-05	2.97248e-05
1326	3.39796e-05	1.57408e-05	2.48602e-05
1327	1.59904e-05	2.42166e-06	9.20603e-06
1328	1.68788e-05	3.63248e-06	1.02556e-05
1329	1.68788e-05	3.63248e-06	1.02556e-05
1330	1.68788e-05	3.63248e-06	1.02556e-05
1331	1.488e-05	3.63248e-06	9.25622e-06
1332	1.488e-05	3.63248e-06	9.25622e-06
1333	1.488e-05	3.63248e-06	9.25622e-06
1334	1.488e-05	3.63248e-06	9.25622e-06
1335	1.44358e-05	3.63248e-06	9.03413e-06
1336	1.19928e-05	2.42166e-06	7.20723e-06
1337	1.19928e-05	2.42166e-06	7.20723e-06
1338	1.19928e-05	2.42166e-06	7.20723e-06
1339	1.19928e-05	2.42166e-06	7.20723e-06
1340	1.04382e-05	2.42166e-06	6.42992e-06
1341	1.02161e-05	2.42166e-06	6.31887e-06
1342	5.33014e-06	2.42166e-06	3.8759e-06
1343	6.44058e-06	2.42166e-06	4.43112e-06
1344	5.33014e-06	2.42166e-06	3.8759e-06
1345	7.77311e-06	3.63248e-06	5.7028e-06
1346	7.9952e-06	3.63248e-06	5.81384e-06
1347	8.43938e-06	3.63248e-06	6.03593e-06
1348	7.55102e-06	3.63248e-06	5.59175e-06
1349	7.55102e-06	3.63248e-06	5.59175e-06
1350	7.10685e-06	3.63248e-06	5.36967e-06
1351	7.55102e-06	3.63248e-06	5.59175e-06
1352	6.88476e-06	2.42166e-06	4.65321e-06
1353	9.77191e-06	3.63248e-06	6.7022e-06
1354	9.77191e-06	3.63248e-06	6.7022e-06
1355	9.77191e-06	3.63248e-06	6.7022e-06
1356	9.77191e-06	3.63248e-06	6.7022e-06
1357	9.77191e-06	3.63248e-06	6.7022e-06
1358	9.77191e-06	3.63248e-06	6.7022e-06
1359	9.994e-06	3.63248e-06	6.81324e-06
1360	1.02161e-05	3.63248e-06	6.92429e-06
1361	1.02161e-05	3.63248e-06	6.92429e-06
1362	1.02161e-05	3.63248e-06	6.92429e-06
1363	8.88356e-06	3.63248e-06	6.25802e-06
1364	9.10565e-06	4.84331e-06	6.97448e-06
1365	9.10565e-06	4.84331e-06	6.97448e-06
1366	9.10565e-06	4.84331e-06	6.97448e-06
1367	7.9952e-06	3.63248e-06	5.81384e-06
1368	7.9952e-06	3.63248e-06	5.81384e-06
1369	7.77311e-06	3.63248e-06	5.7028e-06
1370	6.21849e-06	2.42166e-06	4.32007e-06
1371	7.10685e-06	2.42166e-06	4.76425e-06
1372	5.55222e-06	2.42166e-06	3.98694e-06
1373	2.35414e-05	6.05414e-06	1.47978e-05
1374	2.37635e-05	6.05414e-06	1.49088e-05
1375	2.44298e-05	6.05414e-06	1.5242e-05
1376	2.4874e-05	6.05414e-06	1.54641e-05
1377	2.46519e-05	6.05414e-06	1.5353e-05
1378	2.46519e-05	6.05414e-06	1.5353e-05
1379	2.4874e-05	6.05414e-06	1.54641e-05
1380	5.08584e-05	1.21083e-05	3.14833e-05
1381	5.46339e-05	1.21083e-05	3.33711e-05
1382	5.41897e-05	1.21083e-05	3.3149e-05
1383	5.4856e-05	1.21083e-05	3.34821e-05
1384	5.46339e-05	1.21083e-05	3.33711e-05
1385	5.4856e-05	1.21083e-05	3.34821e-05
1386	5.44118e-05	1.21083e-05	3.326e-05
1387	5.4856e-05	9.68663e-06	3.22713e-05
1388	5.53002e-05	1.21083e-05	3.37042e-05
1389	5.55222e-05	1.33191e-05	3.44207e-05
1390	5.57443e-05	1.33191e-05	3.45317e-05
1391	5.53002e-05	1.33191e-05	3.43096e-05
1392	5.57443e-05	1.33191e-05	3.45317e-05
1393	5.55222e-05	1.33191e-05	3.44207e-05
1394	4.66387e-05	1.33191e-05	2.99789e-05
1395	5.81873e-05	1.69516e-05	3.75695e-05
1396	5.84094e-05	1.69516e-05	3.76805e-05
1397	5.88536e-05	1.69516e-05	3.79026e-05
1398	5.88536e-05	1.69516e-05	3.79026e-05
1399	5.84094e-05	1.69516e-05	3.76805e-05
1400	3.57563e-05	1.33191e-05	2.45377e-05
1401	4.26411e-05	1.93733e-05	3.10072e-05
1402	4.53061e-05	2.05841e-05	3.29451e-05
1403	4.7527e-05	1.93733e-05	3.34501e-05
1404	5.04142e-05	1.93733e-05	3.48937e-05
1405	5.26351e-05	1.93733e-05	3.60042e-05
1406	5.30793e-05	1.93733e-05	3.62263e-05
1407	5.37455e-05	1.93733e-05	3.65594e-05
1408	5.39676e-05	1.93733e-05	3.66704e-05
1409	5.30793e-05	1.81624e-05	3.56208e-05
1410	5.19688e-05	1.69516e-05	3.44602e-05
1411	4.7527e-05	1.81624e-05	3.28447e-05
1412	5.97419e-05	1.93733e-05	3.95576e-05
1413	5.9964e-05	1.93733e-05	3.96686e-05
1414	5.9964e-05	1.93733e-05	3.96686e-05
1415	5.95198e-05	1.93733e-05	3.94465e-05
1416	5.70769e-05	1.69516e-05	3.70142e-05
1417	6.50721e-05	2.05841e-05	4.28281e-05
1418	6.41837e-05	1.81624e-05	4.11731e-05
1419	6.44058e-05	1.81624e-05	4.12841e-05
1420	6.41837e-05	1.81624e-05	4.11731e-05
1421	6.39616e-05	1.81624e-05	4.1062e-05
1422	4.86375e-05	9.68663e-06	2.91621e-05
1423	4.61945e-05	9.68663e-06	2.79406e-05
1424	4.01981e-05	8.4758e-06	2.4337e-05
1425	4.2419e-05	9.68663e-06	2.60528e-05
1426	4.21969e-05	9.68663e-06	2.59418e-05
1427	4.21969e-05	9.68663e-06	2.59418e-05
1428	4.17527e-05	9.68663e-06	2.57197e-05
1429	3.93097e-05	9.68663e-06	2.44982e-05
1430	3.90877e-05	9.68663e-06	2.43871e-05
1431	3.44238e-05	7.26497e-06	2.08444e-05
1432	3.64226e-05	6.05414e-06	2.12384e-05
1433	3.62005e-05	6.05414e-06	2.11273e-05
1434	3.64226e-05	6.05414e-06	2.12384e-05
1435	3.64226e-05	6.05414e-06	2.12384e-05
1436	3.15366e-05	4.84331e-06	1.819e-05
1437	1.13265e-05	1.21083e-06	6.26868e-06
1438	1.7545e-05	7.26497e-06	1.2405e-05
1439	1.84334e-05	8.4758e-06	1.34546e-05
1440	2.08764e-05	8.4758e-06	1.46761e-05
1441	2.10985e-05	9.68663e-06	1.53925e-05
1442	2.22089e-05	9.68663e-06	1.59478e-05
1443	5.39676e-05	2.54274e-05	3.96975e-05
1444	5.50781e-05	2.54274e-05	4.02527e-05
1445	5.30793e-05	2.66382e-05	3.98587e-05
1446	5.33014e-05	2.66382e-05	3.99698e-05
1447	5.30793e-05	2.66382e-05	3.98587e-05
1448	5.2413e-05	2.66382e-05	3.95256e-05
1449	8.06183e-05	7.7493e-05	7.90557e-05
1450	8.30613e-05	7.7493e-05	8.02771e-05
1451	8.66147e-05	8.59688e-05	8.62917e-05
1452	9.61645e-05	0.000100499	9.83316e-05
1453	9.68308e-05	0.00010171	9.92702e-05
1454	9.70529e-05	0.00010171	9.93812e-05
1455	9.70529e-05	0.00010171	9.93812e-05
1456	9.70529e-05	0.00010171	9.93812e-05
1457	9.74971e-05	0.00010292	0.000100209
1458	0.000115264	0.000110185	0.000112725
1459	0.000115486	0.000110185	0.000112836
1460	0.000115708	0.000110185	0.000112947
1461	0.000115708	0.000110185	0.000112947
1462	0.000115042	0.000108975	0.000112008
1463	0.000100606	9.80771e-05	9.93417e-05
1464	0.00010105	9.56554e-05	9.8353e-05
1465	0.000101273	9.44446e-05	9.78586e-05
1466	9.43878e-05	9.20229e-05	9.32054e-05
[truncated: 7,706 more rows]

## Sheet: CANC insGGAA
bp	CLIP43_density	CLIP54_density	average
[truncated: 9,184 more rows]
