# Supplementary material for: Initiation of HIV-1 Gag lattice assembly is required for recognition of the viral genome packaging signal
Source: eLife journal article supplement (doi:10.7554/elife.83548), 2023-01-23
Supplement: supp [file Fig 2B,D.xlsx]

## Sheet: CANC
bp	CLIP33	CLIP34	CLIP45	CLIP46	CLIP48	Average Read Density
1	1.42452e-05	2.05787e-05	1.62933e-05	8.97093e-06	7.83845e-07	1.21744e-05
2	2.66612e-05	3.08034e-05	3.09938e-05	1.22331e-05	1.56769e-06	2.04518e-05
3	3.03749e-05	3.6304e-05	3.41341e-05	1.38642e-05	1.56769e-06	2.3249e-05
4	4.22366e-05	6.16715e-05	5.49332e-05	1.94247e-05	1.56769e-06	3.59667e-05
5	4.43429e-05	6.45189e-05	5.91203e-05	2.00919e-05	1.56769e-06	3.79283e-05
6	4.71144e-05	6.58778e-05	6.16235e-05	2.09816e-05	1.56769e-06	3.9433e-05
7	4.90544e-05	6.78839e-05	6.32164e-05	2.14264e-05	1.56769e-06	4.06298e-05
8	5.54841e-05	7.06019e-05	6.90874e-05	2.31316e-05	1.56769e-06	4.39745e-05
9	6.20247e-05	7.55201e-05	7.69155e-05	2.58748e-05	2.35153e-06	4.85373e-05
10	7.05607e-05	8.06324e-05	8.69737e-05	2.89887e-05	3.13538e-06	5.40582e-05
11	7.2667e-05	8.25738e-05	8.90673e-05	3.03974e-05	3.13538e-06	5.55682e-05
12	7.31104e-05	8.30268e-05	8.94769e-05	3.08422e-05	3.13538e-06	5.59183e-05
13	7.4219e-05	8.33503e-05	9.00685e-05	3.12129e-05	3.13538e-06	5.63972e-05
14	0.000133749	0.000124443	0.00015283	6.49466e-05	1.56769e-05	9.83291e-05
15	0.000136299	0.000125673	0.000155834	6.57621e-05	1.56769e-05	9.9849e-05
16	0.000138627	0.000127355	0.000158883	6.65035e-05	1.64607e-05	0.000101566
17	0.000139957	0.000128196	0.000160066	6.67259e-05	1.64607e-05	0.000102281
18	0.000140567	0.000128585	0.000161705	6.74673e-05	1.64607e-05	0.000102957
19	0.000157307	0.000149358	0.000185781	8.77075e-05	3.29215e-05	0.000122615
20	0.000158249	0.000149681	0.000186463	8.79299e-05	3.29215e-05	0.000123049
21	0.000160078	0.000151493	0.000188784	8.85972e-05	3.29215e-05	0.000124375
22	0.000158304	0.000142304	0.000183414	8.45195e-05	3.29215e-05	0.000120293
23	0.000190397	0.00017822	0.000237118	9.70491e-05	4.07599e-05	0.000148709
24	0.000235239	0.000255875	0.000315672	0.000128484	5.17337e-05	0.000197401
25	0.000244274	0.000266941	0.000331283	0.000130412	5.25176e-05	0.000205086
26	0.000247655	0.0002705	0.000335743	0.000131005	5.25176e-05	0.000207484
27	0.000248431	0.0002716	0.000339475	0.000131302	5.40853e-05	0.000208979
28	0.000248431	0.000271147	0.00033861	0.000130264	5.40853e-05	0.000208507
29	0.000249762	0.000273477	0.000339885	0.000130783	5.40853e-05	0.000209598
30	0.000220384	0.000249727	0.000308709	0.000123814	5.25176e-05	0.00019103
31	0.000371261	0.000342526	0.000453711	0.000162811	5.80045e-05	0.000277663
32	0.000389885	0.00035618	0.000480244	0.000165999	5.87883e-05	0.000290219
33	0.000399918	0.000362652	0.000491713	0.000165999	5.87883e-05	0.000295814
34	0.000408177	0.000370094	0.000499177	0.000166963	5.87883e-05	0.00030064
35	0.000409562	0.000371323	0.000500315	0.000166073	5.87883e-05	0.000301212
36	0.000409396	0.000369705	0.000497721	0.000163182	5.87883e-05	0.000299758
37	0.000414496	0.000387307	0.000510555	0.00016978	6.0356e-05	0.000308499
38	0.000423808	0.000432995	0.000540457	0.00018876	6.5843e-05	0.000330373
39	0.000424417	0.000452279	0.000548603	0.000198324	6.89783e-05	0.00033852
40	0.000424362	0.000458039	0.000549605	0.000199955	6.89783e-05	0.000340188
41	0.000420205	0.000458039	0.000544735	0.000198102	6.5843e-05	0.000337385
42	0.000421535	0.000459721	0.000545827	0.000198843	6.5843e-05	0.000338354
43	0.000420925	0.000459398	0.000545281	0.000198324	6.5843e-05	0.000337954
44	0.000411835	0.000447102	0.000532128	0.000189131	6.19237e-05	0.000328424
45	0.000351917	0.000400962	0.000466773	0.000152728	4.46791e-05	0.000283412
46	0.000365663	0.000420699	0.000480745	0.000166963	5.01661e-05	0.000296847
47	0.000367437	0.000424129	0.000483248	0.000170892	5.17337e-05	0.000299488
48	0.00036145	0.000417334	0.000474282	0.000167408	4.78145e-05	0.000293658
49	0.000352027	0.000412287	0.000464725	0.000165258	4.62468e-05	0.000288109
50	0.000364942	0.000421735	0.000478333	0.000171411	4.70307e-05	0.00029669
51	0.000364166	0.000419793	0.00047633	0.00017067	4.70307e-05	0.000295598
52	0.000364	0.000419793	0.000476012	0.000170596	4.70307e-05	0.000295486
53	0.000363778	0.000418693	0.00047501	0.000170299	4.62468e-05	0.000294805
54	0.000363224	0.000417075	0.000474237	0.00016978	4.62468e-05	0.000294113
55	0.00036073	0.000415716	0.000472917	0.000169187	4.62468e-05	0.000292959
56	0.000348369	0.000376953	0.000447248	0.000158289	4.23276e-05	0.000274637
57	0.000334678	0.000342138	0.000423081	0.000144647	3.60569e-05	0.00025612
58	0.000259295	0.000253093	0.000320132	0.000107058	3.13538e-05	0.000194186
59	0.000259628	0.000252963	0.000319313	0.00010728	3.05699e-05	0.000193951
60	0.000225595	0.000188574	0.000244901	8.74851e-05	2.5083e-05	0.000154328
61	0.000184023	0.000165342	0.000195702	7.87366e-05	1.72446e-05	0.00012821
62	0.00018103	0.000158159	0.000187692	7.65865e-05	1.72446e-05	0.000124142
63	0.000167395	0.00014211	0.000170944	6.97656e-05	1.72446e-05	0.000113492
64	0.000160521	0.000133891	0.000159884	6.66518e-05	1.56769e-05	0.000107325
65	0.000126045	0.000100305	0.000119515	4.91548e-05	1.25415e-05	8.15123e-05
66	0.000141454	0.000109753	0.000137401	5.28617e-05	1.25415e-05	9.08022e-05
67	0.000141565	0.000109818	0.000137356	5.28617e-05	1.25415e-05	9.08284e-05
68	0.000140955	0.000108265	0.000135854	5.2491e-05	1.25415e-05	9.00213e-05
69	0.00011446	8.91098e-05	0.000104678	4.41132e-05	8.62229e-06	7.21967e-05
70	0.000109804	8.67154e-05	0.000100718	4.22597e-05	9.40614e-06	6.97806e-05
71	9.91619e-05	8.08265e-05	9.24807e-05	3.8701e-05	9.40614e-06	6.41152e-05
72	6.8787e-05	6.39364e-05	7.28194e-05	2.63197e-05	8.62229e-06	4.8097e-05
73	7.64916e-05	7.07313e-05	8.29686e-05	3.44751e-05	9.40614e-06	5.48145e-05
74	8.4695e-05	8.03088e-05	9.49383e-05	4.27046e-05	1.019e-05	6.25673e-05
75	6.16921e-05	5.17704e-05	7.64149e-05	3.5513e-05	3.13538e-06	4.57052e-05
76	0.000341829	0.000239956	0.000325594	0.000271426	0.000188123	0.000273386
77	0.000348258	0.000241962	0.000332193	0.000276764	0.00019361	0.000278557
78	0.000348813	0.000242091	0.00033283	0.000276838	0.000194393	0.000278993
79	0.000349256	0.000242156	0.000333012	0.000276764	0.000195177	0.000279273
80	0.000348037	0.000239115	0.000329736	0.00027795	0.000195177	0.000278003
81	0.000356295	0.000247592	0.000339293	0.000290851	0.000203016	0.000287409
82	0.000364443	0.000251086	0.000344572	0.000301824	0.000206935	0.000293772
83	0.000388389	0.000263252	0.000361457	0.000313019	0.000213206	0.000307865
84	0.000387557	0.000262476	0.000360138	0.000314427	0.00021399	0.000307718
85	0.00045906	0.000376565	0.000463678	0.000425266	0.000548691	0.000454652
86	0.000474913	0.000421476	0.000498495	0.000467081	0.00061375	0.000495143
87	0.000487551	0.000447879	0.000518474	0.000498294	0.000645888	0.000519617
88	0.000549686	0.000560285	0.00061232	0.000616325	0.000754842	0.000618692
89	0.000553677	0.00056818	0.000619875	0.000627743	0.000768952	0.000627685
90	0.000555451	0.000573616	0.000623972	0.000632636	0.000776006	0.000632336
91	0.000555506	0.000573163	0.000623061	0.000634563	0.000778358	0.00063293
92	0.000569474	0.000600213	0.000642176	0.000659178	0.000794818	0.000653172
93	0.000568421	0.00059866	0.000639264	0.000657398	0.000795602	0.000651869
94	0.000564153	0.000592124	0.000629114	0.000651912	0.00079717	0.000646895
95	0.000506175	0.000541648	0.000555157	0.000621811	0.000800305	0.000605019
96	0.000668581	0.000833374	0.000769201	0.00103633	0.00148617	0.000958731
97	0.000721847	0.000864825	0.000804109	0.00108697	0.00153163	0.00100188
98	0.000724453	0.000866637	0.000806111	0.00108986	0.00153398	0.00100421
99	0.000723233	0.000866442	0.000804973	0.00109238	0.00153477	0.00100436
100	0.000694133	0.0008535	0.000781262	0.00109697	0.00153947	0.000993068
101	0.0012344	0.00197821	0.00145557	0.00245114	0.0043425	0.00229236
102	0.00125779	0.00202241	0.00149148	0.00251994	0.00446713	0.00235175
103	0.00129637	0.00212492	0.00154614	0.0026419	0.00466701	0.00245527
104	0.0014984	0.0029016	0.00192557	0.00340169	0.00655843	0.00325714
105	0.0015203	0.00297997	0.00196763	0.00349236	0.00669795	0.00333164
106	0.00162251	0.00314965	0.00210717	0.00366236	0.00693154	0.00349465
107	0.0016265	0.0031611	0.0021149	0.00367445	0.006948	0.00350499
108	0.00167012	0.00319482	0.00214981	0.00370915	0.00699425	0.00354363
109	0.00166341	0.00319436	0.00214362	0.00370529	0.00699738	0.00354081
110	0.00168381	0.00320381	0.00215345	0.00371975	0.00702403	0.00355697
111	0.00170421	0.00322115	0.00217352	0.00373309	0.00703971	0.00357434
112	0.00172145	0.00322918	0.00218927	0.00374214	0.00704676	0.00358576
113	0.00170975	0.00321824	0.00217839	0.00373153	0.00704676	0.00357694
114	0.00171363	0.00321708	0.00217985	0.00372761	0.00704128	0.00357589
115	0.00170127	0.00319928	0.00216538	0.00371463	0.00701306	0.00355872
116	0.00172367	0.00322264	0.00218763	0.00373472	0.00702795	0.00357932
117	0.00170986	0.00319132	0.00215964	0.00370017	0.00702168	0.00355654
118	0.00170632	0.00317223	0.00213793	0.00367942	0.00701306	0.00354179
119	0.00174949	0.00320912	0.0021819	0.00369773	0.00701776	0.0035712
120	0.00171086	0.0031281	0.00211959	0.00359786	0.00698092	0.00350747
121	0.00174401	0.00314913	0.00214749	0.00359801	0.00697935	0.0035236
122	0.0017062	0.00307904	0.00208623	0.00349836	0.00694878	0.00346373
123	0.00172666	0.00308442	0.00209925	0.0034799	0.00694251	0.00346655
124	0.00172921	0.00308176	0.00209879	0.00347635	0.00694173	0.00346557
125	0.00169457	0.00300676	0.00203417	0.00339679	0.00691037	0.00340853
126	0.00160106	0.00283993	0.00189604	0.00320158	0.00677007	0.00326173
127	0.0015607	0.00276435	0.0018386	0.00307606	0.0066909	0.00318612
128	0.00147291	0.00262961	0.00173137	0.0028767	0.00635463	0.00301304
129	0.00147363	0.00262664	0.00173156	0.00286751	0.00634757	0.00300938
130	0.00145345	0.00259655	0.00170807	0.00282399	0.00627389	0.00297119
131	0.000946056	0.00197867	0.001218	0.00201193	0.00444832	0.00212059
132	0.000994058	0.00196643	0.00124089	0.00196634	0.00434015	0.00210157
133	0.000998381	0.00193945	0.00123543	0.00193713	0.0042359	0.00206926
134	0.000900605	0.00128099	0.000944468	0.00125526	0.0021932	0.0013149
135	0.000685154	0.000757272	0.000637625	0.000678825	0.00047501	0.000646777
136	0.000711649	0.00078471	0.00067226	0.000701882	0.000479713	0.000670043
137	0.000644968	0.000713849	0.000611956	0.000593416	0.000379381	0.000588714
138	0.000645356	0.000713914	0.000612503	0.000593416	0.000379381	0.000588914
139	0.000644635	0.000712749	0.000611911	0.000590895	0.000377813	0.000587601
140	0.000644524	0.000712167	0.000611365	0.000589783	0.000375462	0.00058666
141	0.000636487	0.000678451	0.000589792	0.000550192	0.000335486	0.000558082
142	0.000620413	0.000640012	0.000567764	0.00051594	0.000303348	0.000529495
143	0.000604394	0.000618462	0.000552745	0.000492808	0.000273562	0.000508394
144	0.000593308	0.000600019	0.000542914	0.000478944	0.000259453	0.000494928
145	0.000563155	0.000531682	0.000496947	0.000413256	0.000192042	0.000439416
146	0.000433508	0.000360193	0.000359182	0.000263271	0.00011209	0.000305649
147	0.000456898	0.000368541	0.000374155	0.000276023	0.000118361	0.000318796
148	0.000456233	0.000366405	0.000372244	0.000273131	0.000116009	0.000316804
149	0.000455236	0.000364205	0.000370924	0.000272464	0.000116009	0.000315768
150	0.000416657	0.00029768	0.000313169	0.000227016	9.17098e-05	0.000269246
151	0.000338891	0.000204946	0.000246357	0.000179863	6.42753e-05	0.000206866
152	0.000270991	0.000152658	0.000201164	0.000147316	6.0356e-05	0.000166497
153	0.000234574	0.000137903	0.000186554	0.00014398	7.83845e-05	0.000156279
154	0.00022504	0.000133826	0.000179682	0.000146278	0.000101116	0.000157188
155	0.00019655	0.000116354	0.000152648	0.000131747	0.000113657	0.000142191
156	0.000117232	8.39975e-05	9.97626e-05	9.63077e-05	9.0926e-05	9.76452e-05
157	0.000313227	0.000177119	0.000193745	0.000174006	0.000160688	0.000203757
158	0.000317883	0.000179255	0.000195975	0.000175563	0.000161472	0.00020603
159	0.000318992	0.000176408	0.000192243	0.000173117	0.000161472	0.000204446
160	0.00032326	0.000177443	0.000191743	0.000173117	0.000160688	0.00020525
161	0.000425082	0.000233679	0.000250226	0.000237693	0.000180284	0.000265393
162	0.000430404	0.000236138	0.000253639	0.000240658	0.000180284	0.000268225
163	0.000437332	0.000240344	0.000258327	0.000245551	0.000180284	0.000272368
164	0.000469924	0.000259111	0.000283859	0.000259712	0.000181852	0.000290892
165	0.000474636	0.000261894	0.000287364	0.000262159	0.000181852	0.000293581
166	0.000501352	0.000285384	0.000314853	0.000280694	0.000190474	0.000314551
167	0.000505177	0.000288814	0.000319222	0.00028314	0.000190474	0.000317365
168	0.000508059	0.000290885	0.00032168	0.000284327	0.000190474	0.000319085
169	0.000508613	0.000291403	0.000321998	0.000283733	0.000190474	0.000319244
170	0.000509057	0.000291467	0.000322044	0.000283511	0.000190474	0.000319311
171	0.000509279	0.000291467	0.00032168	0.000283289	0.000190474	0.000319238
172	0.000500909	0.000284543	0.000308663	0.000270759	0.000186555	0.000310286
173	0.000508558	0.00028629	0.000311212	0.000270759	0.000185771	0.000312518
174	0.000505676	0.000285125	0.000308618	0.000267126	0.000184987	0.000310306
175	0.000506008	0.000284284	0.000307161	0.000265495	0.000184203	0.00030943
176	0.000465545	0.000267718	0.000284178	0.00024266	0.000172446	0.000286509
177	0.000492096	0.000273671	0.000295192	0.000247182	0.000172446	0.000296117
178	0.000491985	0.00027283	0.0002941	0.000245848	0.000171662	0.000295285
179	0.00043251	0.000213488	0.00024258	0.000193431	9.48452e-05	0.000235371
180	0.000485832	0.000240862	0.000273164	0.000225459	0.000100332	0.00026513
181	0.000494978	0.000245003	0.000278807	0.000231835	0.000100332	0.000270191
182	0.000487661	0.000238467	0.000272527	0.000223013	9.0926e-05	0.000262519
183	0.000496364	0.000240279	0.000275349	0.000222865	8.93583e-05	0.000264843
184	0.0004901	0.000233873	0.000268249	0.000214338	8.23037e-05	0.000257773
185	0.00047713	0.000221383	0.000255278	0.000202773	7.28976e-05	0.000245892
186	0.000477906	0.000220542	0.000255369	0.000201735	7.28976e-05	0.00024569
187	0.000457286	0.000203199	0.000233295	0.000183422	6.5843e-05	0.000228609
188	0.00042669	0.000179449	0.000207308	0.000164961	5.33014e-05	0.000206342
189	0.000362503	0.000145216	0.000168714	0.000137233	4.46791e-05	0.000171669
190	0.000369321	0.000149746	0.000176314	0.000140347	4.78145e-05	0.000176709
191	0.000365774	0.000148452	0.000175358	0.000137159	4.78145e-05	0.000174912
192	0.00036206	0.000146187	0.000172673	0.000135305	4.78145e-05	0.000172808
193	0.000216504	7.6879e-05	0.000102721	8.23694e-05	2.58669e-05	0.000100868
194	0.000506563	0.000323241	0.000336016	0.00032414	0.000453846	0.000388761
195	0.000511329	0.000328548	0.000339794	0.000327698	0.000457765	0.000393027
196	0.000513879	0.000331784	0.000341887	0.000328514	0.000459333	0.000395079
197	0.000516152	0.000333531	0.000343116	0.000328959	0.000460901	0.000396532
198	0.000516761	0.000334372	0.000343435	0.000329997	0.000461684	0.00039725
199	0.000509722	0.000329842	0.000339157	0.000325474	0.000461684	0.000393176
200	0.000505343	0.000336508	0.000337609	0.00033578	0.000460117	0.000395071
201	0.000497251	0.000357086	0.000338792	0.000366029	0.00046482	0.000404796
202	0.000663814	0.000590894	0.000469549	0.000593861	0.0005628	0.000576184
203	0.000707159	0.000626292	0.000508234	0.000634341	0.00057691	0.000610587
204	0.000705773	0.000627975	0.000509144	0.000633525	0.000577694	0.000610822
205	0.000707214	0.000629593	0.000510328	0.000634638	0.000577694	0.000611893
206	0.000706217	0.00063024	0.000510419	0.000636046	0.000577694	0.000612123
207	0.000656885	0.00061568	0.000489711	0.000624258	0.000575342	0.000592375
208	0.000833481	0.000995674	0.000678268	0.00100986	0.000753275	0.000854112
209	0.000856816	0.00104427	0.000713084	0.00106109	0.000764249	0.000887903
210	0.0008592	0.00105463	0.000720139	0.00107192	0.000767384	0.000894653
211	0.000866849	0.00106893	0.000731289	0.00108778	0.000774439	0.000905857
212	0.000896725	0.0011473	0.000767107	0.00116459	0.000822253	0.000959594
213	0.000826608	0.0011097	0.00070867	0.00110854	0.00060748	0.000872199
214	0.0011573	0.00173127	0.00109575	0.00163041	0.00110836	0.00134462
215	0.00116705	0.00175864	0.00111755	0.00164628	0.00111071	0.00136005
216	0.00116943	0.00176654	0.00112087	0.00164857	0.00111228	0.00136354
217	0.00116927	0.00176796	0.00112074	0.00164724	0.00111149	0.00136334
218	0.00115253	0.00174861	0.00110162	0.00162759	0.00104643	0.00133536
219	0.00113379	0.00174156	0.00109247	0.00161788	0.00102527	0.00132219
220	0.0012166	0.0019854	0.00120748	0.00188063	0.00168291	0.00159461
221	0.00121732	0.00199161	0.00121185	0.00188738	0.00170173	0.00160198
222	0.00122026	0.00200274	0.00121813	0.00189991	0.00173465	0.00161514
223	0.00122037	0.00200345	0.00121863	0.0019008	0.00173622	0.00161589
224	0.00119221	0.00198701	0.00120043	0.00187752	0.00170878	0.00159319
225	0.00119355	0.00198993	0.00120266	0.00188115	0.00171113	0.00159568
226	0.00119355	0.00199154	0.00120193	0.00187893	0.00171192	0.00159557
227	0.00119759	0.00199678	0.00120475	0.0018816	0.00171819	0.00159978
228	0.00117481	0.00195977	0.00117148	0.00183748	0.00170878	0.00157047
229	0.00119027	0.00201115	0.00119956	0.00189116	0.00185536	0.0016295
230	0.00118335	0.0020316	0.00120029	0.00191526	0.00189847	0.00164579
231	0.00120358	0.00210835	0.00123424	0.00198502	0.00206935	0.00172011
232	0.00117836	0.00210841	0.00121822	0.00198599	0.00209365	0.00171693
233	0.00114033	0.00209152	0.0011825	0.00197123	0.00212735	0.00170259
234	0.00117919	0.00214155	0.00122409	0.00199992	0.0021446	0.00173787
235	0.00117625	0.00213889	0.00122086	0.00199414	0.00214303	0.00173464
236	0.00108313	0.00203011	0.00111409	0.00189672	0.00209443	0.0016437
237	0.00110763	0.00206499	0.00114176	0.00192252	0.0021007	0.00166752
238	0.000988404	0.0019865	0.00105429	0.00184623	0.00206073	0.00158723
239	0.00108912	0.00214329	0.00118468	0.00199229	0.00222612	0.0017271
240	0.001092	0.00214685	0.00118973	0.0019937	0.0022269	0.00172984
241	0.00109211	0.00214601	0.00119101	0.0019894	0.0022222	0.00172814
242	0.00109294	0.00214782	0.00119296	0.00198895	0.00222142	0.00172882
243	0.00106689	0.00209761	0.00115983	0.00194669	0.00219398	0.001693
244	0.00102781	0.00204312	0.00111514	0.00189405	0.00213441	0.00164291
245	0.00101191	0.00203212	0.00110545	0.00187722	0.00210149	0.00162564
246	0.00102161	0.00204758	0.00111605	0.00188805	0.00210149	0.00163496
247	0.00102183	0.00204713	0.00111637	0.0018859	0.00209992	0.00163423
248	0.00101396	0.00202668	0.00110685	0.00186847	0.00208503	0.0016202
249	0.00100947	0.00201219	0.00109971	0.00185009	0.00207876	0.00161004
250	0.000992506	0.00196326	0.00107727	0.0018145	0.00205681	0.00158087
251	0.000991951	0.00195977	0.00107641	0.0018099	0.00205367	0.00157834
252	0.000954537	0.00188017	0.00103199	0.0017328	0.0020137	0.00152264
253	0.000889796	0.0017864	0.000972003	0.00165095	0.00196118	0.00145206
254	0.000890351	0.00177747	0.000968271	0.00163997	0.00195099	0.00144541
255	0.000849056	0.00163569	0.000913565	0.00145944	0.00179344	0.00133024
256	0.000848613	0.00163368	0.000913156	0.00145796	0.00179265	0.00132921
257	0.000825444	0.00154172	0.000874197	0.00136825	0.00169389	0.0012607
258	0.000558333	0.000853953	0.000549741	0.000791443	0.000855958	0.000721886
259	0.000553289	0.000813895	0.000529033	0.000715969	0.000811279	0.000684693
260	0.000414274	0.000524499	0.000364552	0.000459148	0.000406815	0.000433858
261	0.000436778	0.000563844	0.000387126	0.000491622	0.000398977	0.000455669
262	0.000269771	0.000332301	0.000231156	0.000254596	9.17098e-05	0.000235907
263	0.000340775	0.000499584	0.000321953	0.000368327	0.000360569	0.000378242
264	0.00032459	0.000479588	0.00029988	0.000346456	0.000345675	0.000359238
265	0.000344933	0.000524369	0.000326459	0.000377669	0.000361352	0.000386956
266	0.000345598	0.000525858	0.000326049	0.00037752	0.000360569	0.000387119
267	0.000291721	0.000486965	0.000282812	0.00034438	0.000344108	0.000349997
268	0.000377968	0.000679422	0.000393407	0.000578514	0.000447575	0.000495377
269	0.000383511	0.000690164	0.000404057	0.000594973	0.000450711	0.000504683
270	0.000374531	0.000676704	0.000399779	0.000590005	0.000440521	0.000496308
271	0.000376471	0.00068091	0.000403784	0.000593342	0.000442088	0.000499319
272	0.000375751	0.000680522	0.000403147	0.000592748	0.000442088	0.000498851
273	0.000376083	0.000681363	0.000402783	0.00059223	0.000442088	0.000498909
274	0.000361339	0.000668485	0.000389766	0.00058489	0.000438953	0.000488687
275	0.000376471	0.000729316	0.000416573	0.000645314	0.000450711	0.000523677
276	0.000377635	0.000738117	0.000421488	0.000654729	0.000451495	0.000528693
277	0.000376361	0.000736046	0.000420851	0.000653617	0.000451495	0.000527674
278	0.000376305	0.000736434	0.000421033	0.000653617	0.000451495	0.000527777
279	0.000376361	0.000736563	0.000421124	0.000653543	0.000451495	0.000527817
280	0.000376305	0.000736046	0.000421169	0.00065295	0.000451495	0.000527593
281	0.000374698	0.00073171	0.000418757	0.000649169	0.000451495	0.000525166
282	0.000374698	0.00073158	0.000418848	0.000648947	0.000451495	0.000525114
283	0.000371649	0.000726339	0.00041589	0.000643683	0.000446791	0.00052087
284	0.000360342	0.000706407	0.000404239	0.000630931	0.000446008	0.000509585
285	0.000364831	0.000710613	0.000410884	0.000630708	0.000449143	0.000513236
286	0.000364388	0.00071029	0.000410884	0.000630189	0.000449143	0.000512979
287	0.000348258	0.000679098	0.000391951	0.000610097	0.00044444	0.000494769
288	0.000324091	0.000645771	0.000370787	0.000587929	0.000435818	0.000472879
289	0.000338503	0.000687252	0.000389812	0.000608763	0.000440521	0.00049297
290	0.000335177	0.000678969	0.000384532	0.000599273	0.000442872	0.000488165
291	0.000304414	0.000611991	0.000343389	0.000538033	0.000409167	0.000441399
292	0.00044487	0.00102687	0.000516927	0.000895907	0.00106995	0.000790904
293	0.000452797	0.00104984	0.00052653	0.000916443	0.00108563	0.000806247
294	0.000453573	0.00105715	0.000525938	0.000919335	0.00109111	0.000809422
295	0.000400472	0.000947398	0.000450479	0.000803825	0.00101116	0.000722667
296	0.000612598	0.00143126	0.000725828	0.00118023	0.0016931	0.0011286
297	0.000610602	0.00142957	0.00072337	0.00116867	0.00169389	0.00112522
298	0.00063366	0.00148762	0.00076738	0.00120574	0.00170878	0.00116064
299	0.000627397	0.00147934	0.000761373	0.00119313	0.00170408	0.00115306
300	0.000618418	0.00150684	0.000770566	0.0012345	0.0017417	0.00117441
301	0.00085798	0.00250634	0.00129787	0.00236647	0.00316752	0.00203923
302	0.000944449	0.00291357	0.00152293	0.00282755	0.00383222	0.00240814
303	0.000967452	0.00304054	0.00159261	0.00296115	0.00402975	0.0025183
304	0.00097244	0.00307969	0.00161322	0.00300089	0.00406424	0.0025461
305	0.000976875	0.00310189	0.00162688	0.00303039	0.00407286	0.00256178
306	0.000965013	0.00307432	0.00161263	0.00302053	0.00407364	0.00254923
307	0.000990787	0.00325086	0.00167858	0.00321693	0.00425784	0.002679
308	0.00101418	0.00339115	0.00173497	0.00336736	0.00442324	0.00278618
309	0.00101845	0.00347315	0.0017595	0.00345633	0.0045024	0.00284197
310	0.00109449	0.00374138	0.00189039	0.00373161	0.00494214	0.00308
311	0.00110541	0.00378629	0.00191001	0.00377083	0.00497036	0.00310858
312	0.00110297	0.00379218	0.00191119	0.00377372	0.00497898	0.00311181
313	0.00109034	0.00378895	0.00190537	0.00377031	0.00498917	0.00310883
314	0.00113174	0.00391132	0.00196876	0.00388701	0.00518435	0.00321664
315	0.00113335	0.00391688	0.00197109	0.00389338	0.00518592	0.00322012
316	0.00113013	0.00391811	0.00196863	0.00389464	0.0051867	0.00321964
317	0.00113856	0.00396296	0.00198715	0.00393927	0.00524157	0.0032539
318	0.00113235	0.00395105	0.00197714	0.00392978	0.0052353	0.00324513
319	0.00113501	0.00395662	0.00198087	0.00393357	0.0052447	0.00325015
320	0.0011354	0.00395752	0.00198092	0.00393349	0.0052447	0.00325041
321	0.00113535	0.0039583	0.00198151	0.00393386	0.00524706	0.00325121
322	0.00113235	0.00395209	0.00197782	0.00392853	0.00524549	0.00324726
323	0.00103779	0.00373459	0.00184875	0.00372775	0.00488257	0.00304629
324	0.00105636	0.00381794	0.00188543	0.0038297	0.00498604	0.00311509
325	0.00105697	0.00382176	0.00188716	0.00383511	0.00498995	0.00311819
326	0.00104932	0.00379729	0.0018766	0.00382302	0.00496409	0.00310207
327	0.00104871	0.00379063	0.00187519	0.0038185	0.00496879	0.00310036
328	0.00104882	0.00379147	0.00187496	0.00381909	0.00496958	0.00310078
329	0.00104067	0.00374643	0.00185157	0.00377513	0.00491706	0.00306617
330	0.00104139	0.00375083	0.00185439	0.00378158	0.00491627	0.00306889
331	0.00101052	0.00364807	0.00180224	0.00368742	0.00476107	0.00298186
332	0.00101091	0.00364962	0.00180187	0.00368742	0.00475794	0.00298155
333	0.000948274	0.00338106	0.00165405	0.00341407	0.00417632	0.00271476
334	0.000948883	0.00338138	0.00165505	0.0034157	0.00417476	0.00271515
335	0.00094711	0.00336786	0.00165022	0.00340109	0.00417319	0.0027079
336	0.000945447	0.0033533	0.00164408	0.00338931	0.00417005	0.00270044
337	0.000892069	0.00314175	0.00152839	0.00319573	0.00409402	0.00257039
338	0.000890461	0.00312997	0.00152261	0.00317934	0.00409716	0.00256391
339	0.000890461	0.00312557	0.00152124	0.00317423	0.00409637	0.00256157
340	0.000887579	0.00309652	0.00150791	0.00311721	0.00408775	0.00253939
341	0.00086186	0.00297874	0.0014451	0.00296782	0.00405091	0.00246089
342	0.000859865	0.00295298	0.00143422	0.00294083	0.00404621	0.00244682
343	0.000792685	0.00268876	0.00129482	0.00265443	0.00386357	0.00225885
344	0.000777553	0.00259493	0.00125891	0.00255983	0.00372013	0.00218227
345	0.000776833	0.00259298	0.00125859	0.0025579	0.00372013	0.00218129
346	0.000720295	0.00237963	0.0011688	0.0023228	0.00329528	0.00197736
347	0.000719464	0.00237561	0.00116748	0.00231917	0.00329372	0.00197509
348	0.000711482	0.00229893	0.00113525	0.0022325	0.0032169	0.00191901
349	0.0005922	0.00173612	0.000871285	0.0017675	0.00192434	0.00137829
350	0.000590094	0.00172201	0.000866824	0.00175682	0.00190396	0.00136794
351	0.000521916	0.00148206	0.000731153	0.00150919	0.00152928	0.00115472
352	0.000431623	0.00120347	0.000591658	0.00123769	0.00125885	0.000944659
353	0.00042935	0.00118897	0.000586925	0.0012239	0.00124945	0.000935719
354	0.000418597	0.00113222	0.000562985	0.00116407	0.00120869	0.000897312
355	7.75447e-05	0.000177767	9.62582e-05	0.00020774	0.00019361	0.000150584
356	8.71339e-05	0.000193686	0.00010932	0.000231168	0.000195961	0.000163454
357	8.50276e-05	0.000174143	0.000102084	0.000210706	0.00018342	0.000151076
358	4.14052e-05	8.60683e-05	5.00634e-05	0.000106687	7.99522e-05	7.28352e-05
359	5.85327e-05	0.000102894	6.59471e-05	0.000124926	8.38714e-05	8.72342e-05
360	6.01955e-05	0.000106194	6.77676e-05	0.000127743	8.38714e-05	8.91543e-05
361	6.0251e-05	0.000106323	6.78131e-05	0.000127669	8.38714e-05	8.91855e-05
362	5.75904e-05	9.99169e-05	6.44907e-05	0.000119143	8.0736e-05	8.43754e-05
363	5.90315e-05	0.000104576	6.72214e-05	0.000124036	8.15198e-05	8.72769e-05
364	5.9087e-05	0.000104641	6.73125e-05	0.000124258	8.15198e-05	8.73637e-05
365	5.89761e-05	0.000104576	6.7358e-05	0.000124184	8.15198e-05	8.73228e-05
366	5.89761e-05	0.000104641	6.7267e-05	0.000124036	8.15198e-05	8.7288e-05
367	5.80338e-05	0.000102635	6.67208e-05	0.000121589	7.91683e-05	8.56294e-05
368	5.80338e-05	0.000102764	6.67663e-05	0.000121664	7.91683e-05	8.56793e-05
369	5.79784e-05	0.00010257	6.65388e-05	0.00012107	7.91683e-05	8.54651e-05
370	5.77567e-05	0.000102247	6.66753e-05	0.000120181	7.91683e-05	8.52057e-05
371	5.7923e-05	0.000102117	6.66298e-05	0.00011981	7.91683e-05	8.51296e-05
372	5.64818e-05	9.66165e-05	6.43542e-05	0.000110394	7.91683e-05	8.1403e-05
373	4.40658e-05	7.22197e-05	5.13377e-05	8.03677e-05	5.01661e-05	5.96314e-05
374	5.35995e-05	8.49035e-05	5.9894e-05	9.84578e-05	5.40853e-05	7.0188e-05
375	5.35995e-05	8.50329e-05	5.99395e-05	9.89026e-05	5.40853e-05	7.0312e-05
376	5.43755e-05	8.76214e-05	6.10318e-05	0.000102832	5.48691e-05	7.2146e-05
377	4.88881e-05	7.90146e-05	5.35223e-05	9.11921e-05	3.44892e-05	6.14213e-05
378	8.23116e-05	0.000128649	9.32999e-05	0.000156213	4.5463e-05	0.000101187
379	8.75219e-05	0.00013525	9.87159e-05	0.000164813	4.62468e-05	0.00010651
380	8.90184e-05	0.000136803	9.99902e-05	0.000168668	4.70307e-05	0.000108302
381	8.95173e-05	0.000134991	9.88979e-05	0.000167334	4.70307e-05	0.000107554
382	9.75544e-05	0.0001601	0.000112096	0.000190317	5.01661e-05	0.000122047
383	9.91064e-05	0.00016683	0.000115237	0.000195878	5.09499e-05	0.0001256
384	9.95499e-05	0.000168642	0.000116147	0.000197286	5.09499e-05	0.000126515
385	9.99933e-05	0.000169936	0.000116602	0.00019825	5.09499e-05	0.000127146
386	0.000100381	0.00017013	0.000116875	0.000198991	5.09499e-05	0.000127465
387	0.000100215	0.000169742	0.000116784	0.000198176	5.09499e-05	0.000127173
388	0.000100104	0.000169548	0.000116238	0.000197286	5.09499e-05	0.000126825
389	9.9827e-05	0.000168189	0.000115328	0.000194988	4.93822e-05	0.000125543
390	0.000100049	0.000167866	0.000115555	0.00019484	4.93822e-05	0.000125538
391	9.89402e-05	0.000165536	0.000114099	0.000192319	4.93822e-05	0.000124055
392	9.71664e-05	0.000157706	0.000110185	0.00018572	4.46791e-05	0.000119091
393	9.63904e-05	0.000154794	0.000108091	0.00018231	4.23276e-05	0.000116783
394	0.000101379	0.000166054	0.000115737	0.000191577	4.31115e-05	0.000123572
395	0.000103929	0.000172201	0.000121199	0.000196619	4.5463e-05	0.000127882
396	0.000104816	0.000173366	0.000121153	0.000196174	4.5463e-05	0.000128194
397	9.36744e-05	0.000151105	0.000103267	0.000165629	3.91922e-05	0.000110574
398	9.52819e-05	0.00015324	0.000105588	0.00016637	3.60569e-05	0.000111307
399	9.52264e-05	0.000153111	0.000105452	0.000165703	3.60569e-05	0.00011111
400	9.5171e-05	0.000152982	0.000105406	0.000165406	3.60569e-05	0.000111004
401	9.50602e-05	0.000152658	0.000105224	0.000165035	3.60569e-05	0.000110807
402	9.31202e-05	0.000145734	0.000101902	0.000155842	3.60569e-05	0.000106531
403	8.49167e-05	0.000133244	9.23897e-05	0.00014309	3.37053e-05	9.74691e-05
404	8.53601e-05	0.000133244	9.25717e-05	0.000143387	3.37053e-05	9.76536e-05
405	8.53047e-05	0.000133179	9.25717e-05	0.000143312	3.37053e-05	9.76145e-05
406	8.53047e-05	0.000133179	9.25262e-05	0.00014309	3.37053e-05	9.7561e-05
407	8.48059e-05	0.000132079	9.20256e-05	0.000142942	3.37053e-05	9.71116e-05
408	8.47504e-05	0.000132015	9.18435e-05	0.000142719	3.37053e-05	9.70066e-05
409	8.47504e-05	0.000131885	9.1798e-05	0.000142423	3.37053e-05	9.69123e-05
410	8.4695e-05	0.00013182	9.17525e-05	0.000142423	3.37053e-05	9.68792e-05
411	8.22561e-05	0.000128714	8.96589e-05	0.000138419	3.29215e-05	9.43939e-05
412	8.22561e-05	0.000128714	8.95679e-05	0.000138197	3.29215e-05	9.43313e-05
413	8.10921e-05	0.000125737	8.81115e-05	0.000131153	3.13538e-05	9.14895e-05
414	8.06487e-05	0.000125155	8.77474e-05	0.000129597	3.05699e-05	9.07436e-05
415	7.87641e-05	0.000120237	8.49712e-05	0.000122183	2.90023e-05	8.70315e-05
416	7.63253e-05	0.000116095	8.18308e-05	0.00011766	2.90023e-05	8.41827e-05
417	1.06423e-05	5.63003e-06	5.82556e-06	8.30367e-06	1.56769e-06	6.39385e-06
418	1.14737e-05	5.63003e-06	5.78004e-06	8.89679e-06	1.56769e-06	6.66965e-06
419	1.14183e-05	5.43589e-06	5.73453e-06	8.30367e-06	1.56769e-06	6.49202e-06
420	7.42744e-06	2.84737e-06	3.41341e-06	4.89323e-06	7.83845e-07	3.87306e-06
421	8.20344e-06	2.9768e-06	3.68648e-06	5.26393e-06	3.13538e-06	4.65321e-06
422	7.09487e-06	2.26496e-06	2.36663e-06	4.30011e-06	3.13538e-06	3.83239e-06
423	8.86859e-06	2.91209e-06	2.95829e-06	5.41221e-06	3.91922e-06	4.81408e-06
424	9.03487e-06	2.84737e-06	3.0038e-06	5.41221e-06	3.91922e-06	4.84349e-06
425	8.81316e-06	2.71795e-06	2.82175e-06	5.26393e-06	3.91922e-06	4.7072e-06
426	8.36973e-06	2.58852e-06	2.6397e-06	5.33807e-06	3.91922e-06	4.57105e-06
427	6.81773e-06	2.0061e-06	2.18458e-06	4.44839e-06	5.48691e-06	4.18874e-06
428	1.26932e-05	4.07692e-06	4.32365e-06	6.82087e-06	6.27076e-06	6.83708e-06
429	1.3192e-05	4.14163e-06	4.36917e-06	6.74673e-06	6.27076e-06	6.94406e-06
430	1.49103e-05	4.40048e-06	4.8698e-06	7.48813e-06	7.0546e-06	7.74466e-06
431	1.49657e-05	4.40048e-06	4.8698e-06	7.48813e-06	7.0546e-06	7.75574e-06
432	1.4356e-05	4.20635e-06	4.55121e-06	7.04329e-06	7.0546e-06	7.44229e-06
433	2.19497e-05	6.4713e-06	7.78258e-06	1.26038e-05	7.83845e-06	1.13292e-05
434	2.1728e-05	6.40659e-06	7.78258e-06	1.23814e-05	7.83845e-06	1.12274e-05
435	3.60841e-05	1.06129e-05	1.46549e-05	1.97212e-05	1.019e-05	1.82526e-05
436	3.64721e-05	1.10012e-05	1.4928e-05	1.97212e-05	1.019e-05	1.84625e-05
437	6.49624e-05	2.36202e-05	3.43617e-05	3.72924e-05	2.97861e-05	3.80046e-05
438	6.78447e-05	2.52381e-05	3.66373e-05	4.0258e-05	3.13538e-05	4.02664e-05
439	6.88978e-05	2.53028e-05	3.70924e-05	4.07769e-05	3.13538e-05	4.06847e-05
440	0.000122608	4.73052e-05	7.30015e-05	7.69572e-05	7.28976e-05	7.85539e-05
441	0.000126599	4.91819e-05	7.60508e-05	7.91814e-05	7.44652e-05	8.10957e-05
442	0.000136022	5.7271e-05	8.65641e-05	8.71885e-05	7.68168e-05	8.87725e-05
443	0.000137131	5.78534e-05	8.72468e-05	8.77075e-05	7.68168e-05	8.93511e-05
444	0.000137408	5.81123e-05	8.73378e-05	8.77816e-05	7.68168e-05	8.94913e-05
445	0.000137408	5.80476e-05	8.73378e-05	8.77816e-05	7.68168e-05	8.94784e-05
446	0.000150045	6.37423e-05	9.77601e-05	9.43801e-05	8.0736e-05	9.73327e-05
447	0.000150323	6.38717e-05	9.78966e-05	9.43801e-05	8.0736e-05	9.74415e-05
448	0.000150489	6.39364e-05	9.78966e-05	9.44542e-05	8.0736e-05	9.75024e-05
449	0.000150045	6.3807e-05	9.77601e-05	9.40835e-05	8.23037e-05	9.75999e-05
450	0.000167616	7.84322e-05	0.000120061	0.000113805	0.000102684	0.00011652
451	0.000167949	7.85616e-05	0.00012088	0.000114101	0.000102684	0.000116835
452	0.000168171	7.89499e-05	0.000121381	0.000114101	0.000102684	0.000117057
453	0.00016806	7.90146e-05	0.000122064	0.000113656	0.000103467	0.000117252
454	0.000168171	7.92734e-05	0.000122564	0.000113879	0.000103467	0.000117471
455	0.000168004	7.92734e-05	0.000122337	0.000113656	0.000103467	0.000117347
456	0.000163515	7.51318e-05	0.000117194	0.000107429	0.000102684	0.000113191
457	0.000145279	6.6525e-05	0.000105816	9.51956e-05	9.0926e-05	0.000100748
458	0.00016418	7.09902e-05	0.000122928	9.86802e-05	9.48452e-05	0.000110325
459	0.000164291	7.09255e-05	0.000122883	9.84578e-05	9.48452e-05	0.000110281
460	0.000164235	7.05372e-05	0.00012261	9.79388e-05	9.40614e-05	0.000109876
461	0.000163681	7.00195e-05	0.000121699	9.66043e-05	9.32775e-05	0.000109056
462	0.000136687	5.23528e-05	0.0001004	7.42882e-05	6.81945e-05	8.63845e-05
463	0.000144946	5.58473e-05	0.000110139	7.70314e-05	6.89783e-05	9.13884e-05
464	0.000145667	5.59767e-05	0.000110458	7.70314e-05	6.89783e-05	9.16223e-05
465	0.000144447	5.50061e-05	0.000108956	7.48072e-05	6.81945e-05	9.02822e-05
466	0.000139015	5.18351e-05	0.000103677	6.84311e-05	6.34914e-05	8.52899e-05
467	0.000134137	4.91819e-05	0.000101356	6.25741e-05	5.72207e-05	8.08939e-05
468	0.000134248	4.96349e-05	0.000102129	6.24999e-05	5.72207e-05	8.11465e-05
469	0.000102709	3.56569e-05	7.96918e-05	3.84045e-05	3.60569e-05	5.85038e-05
470	0.000108252	3.83101e-05	8.34238e-05	4.15183e-05	3.60569e-05	6.15122e-05
471	0.000108474	3.83748e-05	8.34693e-05	4.12959e-05	3.60569e-05	6.15342e-05
472	0.000105259	3.64334e-05	8.042e-05	3.94424e-05	3.21376e-05	5.87385e-05
473	7.37201e-05	2.27143e-05	5.4387e-05	1.99436e-05	1.019e-05	3.6191e-05
474	8.54156e-05	3.4492e-05	6.84958e-05	3.09905e-05	1.41092e-05	4.67006e-05
475	8.5859e-05	3.46215e-05	6.89054e-05	3.1287e-05	1.41092e-05	4.69564e-05
476	8.36418e-05	3.42979e-05	6.71304e-05	3.10646e-05	1.41092e-05	4.60488e-05
477	8.25887e-05	3.39096e-05	6.5674e-05	3.06939e-05	1.41092e-05	4.53951e-05
478	8.39744e-05	3.39743e-05	6.60381e-05	3.06939e-05	1.33254e-05	4.56012e-05
479	8.32538e-05	3.37802e-05	6.60836e-05	3.06939e-05	1.33254e-05	4.54274e-05
480	8.34201e-05	3.37802e-05	6.61747e-05	3.07681e-05	1.25415e-05	4.53369e-05
481	8.31984e-05	3.37802e-05	6.5674e-05	3.06939e-05	1.25415e-05	4.51776e-05
482	7.93184e-05	3.23565e-05	6.26247e-05	2.99525e-05	1.25415e-05	4.33587e-05
483	7.71013e-05	3.20329e-05	6.15324e-05	2.92853e-05	1.25415e-05	4.24987e-05
484	7.50504e-05	3.15152e-05	5.92113e-05	2.89887e-05	1.25415e-05	4.14614e-05
485	7.14475e-05	2.91856e-05	5.57979e-05	2.77283e-05	1.25415e-05	3.93402e-05
486	6.74013e-05	2.63382e-05	4.91531e-05	2.60231e-05	1.09738e-05	3.59779e-05
487	4.73361e-05	2.03199e-05	3.39976e-05	2.26868e-05	7.83845e-06	2.64358e-05
488	5.80338e-05	2.28437e-05	3.87764e-05	2.76542e-05	1.72446e-05	3.29105e-05
489	5.77012e-05	2.28437e-05	3.83667e-05	2.74318e-05	1.64607e-05	3.25608e-05
490	5.84772e-05	2.29731e-05	3.86853e-05	2.81732e-05	1.64607e-05	3.29539e-05
491	5.82001e-05	2.29731e-05	3.83667e-05	2.8099e-05	1.64607e-05	3.28199e-05
492	5.81447e-05	2.29084e-05	3.82757e-05	2.80249e-05	1.64607e-05	3.27629e-05
493	3.69155e-05	8.08913e-06	1.81138e-05	1.58659e-05	1.09738e-05	1.79916e-05
494	3.96869e-05	8.28326e-06	1.86145e-05	1.62366e-05	1.17577e-05	1.89158e-05
495	3.94098e-05	8.15384e-06	1.84324e-05	1.57918e-05	1.17577e-05	1.87091e-05
496	3.65275e-05	7.70085e-06	1.71581e-05	1.46797e-05	1.17577e-05	1.75648e-05
497	5.12715e-05	1.12601e-05	2.32567e-05	2.00919e-05	2.038e-05	2.5252e-05
498	5.14932e-05	1.13248e-05	2.33932e-05	2.04626e-05	2.038e-05	2.54108e-05
499	5.19921e-05	1.15836e-05	2.37573e-05	2.07592e-05	2.11638e-05	2.58512e-05
500	5.19921e-05	1.15836e-05	2.38029e-05	2.07592e-05	2.11638e-05	2.58603e-05
501	5.19921e-05	1.15836e-05	2.38484e-05	2.07592e-05	2.11638e-05	2.58694e-05
502	5.19921e-05	1.15836e-05	2.38029e-05	2.07592e-05	2.11638e-05	2.58603e-05
503	5.14378e-05	1.11306e-05	2.32112e-05	2.04626e-05	2.11638e-05	2.54812e-05
504	5.04955e-05	1.03541e-05	2.16183e-05	2.00919e-05	2.11638e-05	2.47447e-05
505	4.99967e-05	1.01599e-05	2.12997e-05	1.97954e-05	2.11638e-05	2.44831e-05
506	4.19595e-05	8.73626e-06	1.72036e-05	1.60884e-05	2.038e-05	2.08736e-05
507	4.38995e-05	8.86568e-06	1.77042e-05	1.61625e-05	2.038e-05	2.14024e-05
508	4.39549e-05	8.86568e-06	1.74767e-05	1.61625e-05	2.038e-05	2.1368e-05
509	4.38441e-05	8.67154e-06	1.73401e-05	1.59401e-05	2.038e-05	2.12352e-05
510	3.18715e-05	5.11233e-06	1.07864e-05	8.30367e-06	1.4893e-05	1.41934e-05
511	3.50863e-05	5.56532e-06	1.23338e-05	8.97093e-06	1.4893e-05	1.53699e-05
512	3.49755e-05	5.56532e-06	1.24703e-05	8.97093e-06	1.4893e-05	1.5375e-05
513	3.51418e-05	5.69474e-06	1.25158e-05	9.04507e-06	1.25415e-05	1.49878e-05
514	3.03195e-05	5.43589e-06	1.14691e-05	8.45195e-06	1.25415e-05	1.36436e-05
515	3.69709e-05	6.08302e-06	1.45184e-05	9.19335e-06	1.25415e-05	1.58614e-05
516	3.66383e-05	5.88888e-06	1.42453e-05	9.11921e-06	1.25415e-05	1.56866e-05
517	3.64721e-05	5.75946e-06	1.42908e-05	9.11921e-06	1.25415e-05	1.56366e-05
518	3.71372e-05	5.75946e-06	1.44274e-05	9.11921e-06	1.25415e-05	1.5797e-05
519	3.71926e-05	5.75946e-06	1.44729e-05	9.26749e-06	1.25415e-05	1.58468e-05
520	3.71372e-05	5.75946e-06	1.44729e-05	9.19335e-06	1.25415e-05	1.58209e-05
521	3.68046e-05	5.75946e-06	1.44274e-05	9.04507e-06	1.25415e-05	1.57156e-05
522	3.12063e-05	4.52991e-06	1.20152e-05	6.67259e-06	8.62229e-06	1.26093e-05
523	3.23149e-05	4.65934e-06	1.26524e-05	7.11743e-06	1.019e-05	1.33868e-05
524	3.23149e-05	4.65934e-06	1.26979e-05	7.11743e-06	1.019e-05	1.33959e-05
525	3.13172e-05	4.40048e-06	1.22883e-05	6.89501e-06	9.40614e-06	1.28614e-05
526	2.31138e-05	2.52381e-06	9.23897e-06	3.70699e-06	4.70307e-06	8.65733e-06
527	2.4444e-05	2.45909e-06	9.51204e-06	3.78113e-06	5.48691e-06	9.13663e-06
528	1.90675e-05	1.61783e-06	7.5095e-06	2.89146e-06	3.13538e-06	6.84433e-06
529	2.38343e-05	2.20024e-06	9.01141e-06	3.63286e-06	3.13538e-06	8.36284e-06
530	2.42223e-05	2.20024e-06	9.19345e-06	3.63286e-06	3.13538e-06	8.47685e-06
531	2.38343e-05	2.07082e-06	8.78384e-06	3.41044e-06	3.13538e-06	8.24696e-06
532	2.37235e-05	2.26496e-06	9.05692e-06	3.78113e-06	3.13538e-06	8.39238e-06
533	2.98206e-05	2.91209e-06	1.12415e-05	5.04151e-06	7.0546e-06	1.12141e-05
534	2.98206e-05	2.71795e-06	1.08774e-05	4.96737e-06	7.0546e-06	1.10876e-05
535	2.9488e-05	2.71795e-06	1.09684e-05	4.96737e-06	7.83845e-06	1.1196e-05
536	2.95435e-05	2.71795e-06	1.07409e-05	4.81909e-06	8.62229e-06	1.12887e-05
537	3.07075e-05	3.04151e-06	1.13325e-05	5.48635e-06	8.62229e-06	1.1838e-05
538	3.05412e-05	3.23565e-06	1.14235e-05	5.63463e-06	9.40614e-06	1.20482e-05
539	2.93772e-05	3.17094e-06	1.02402e-05	5.48635e-06	9.40614e-06	1.15362e-05
540	2.69383e-05	2.78266e-06	9.42101e-06	5.11565e-06	9.40614e-06	1.07328e-05
541	3.88001e-05	5.37118e-06	1.62478e-05	1.00089e-05	1.41092e-05	1.69074e-05
542	3.89109e-05	5.43589e-06	1.62023e-05	1.0083e-05	1.41092e-05	1.69483e-05
543	3.92435e-05	5.50061e-06	1.62933e-05	1.02313e-05	1.41092e-05	1.70756e-05
544	3.74143e-05	5.56532e-06	1.55196e-05	9.71233e-06	1.33254e-05	1.63074e-05
545	5.45418e-05	1.55958e-05	3.31328e-05	3.00267e-05	3.91922e-05	3.44979e-05
546	5.49298e-05	1.59194e-05	3.3588e-05	3.01749e-05	3.91922e-05	3.47609e-05
547	5.49298e-05	1.59194e-05	3.3861e-05	3.01749e-05	3.91922e-05	3.48155e-05
548	5.49298e-05	1.59194e-05	3.39521e-05	3.01749e-05	3.91922e-05	3.48337e-05
549	5.40984e-05	1.59194e-05	3.32239e-05	2.99525e-05	3.91922e-05	3.44773e-05
550	5.14932e-05	1.55958e-05	3.24047e-05	2.97301e-05	3.91922e-05	3.36832e-05
551	5.25464e-05	1.57253e-05	3.32694e-05	2.98784e-05	3.91922e-05	3.41223e-05
552	5.24909e-05	1.57253e-05	3.32694e-05	2.98784e-05	3.91922e-05	3.41112e-05
553	5.20475e-05	1.57253e-05	3.31328e-05	2.97301e-05	3.91922e-05	3.39656e-05
554	5.19921e-05	1.57253e-05	3.31328e-05	2.97301e-05	3.91922e-05	3.39545e-05
555	5.18258e-05	1.56605e-05	3.31328e-05	2.97301e-05	3.91922e-05	3.39083e-05
556	5.17704e-05	1.56605e-05	3.30418e-05	2.9656e-05	3.91922e-05	3.38642e-05
557	5.17149e-05	1.56605e-05	3.29963e-05	2.9656e-05	3.91922e-05	3.3844e-05
558	4.83892e-05	1.52723e-05	3.20861e-05	2.89887e-05	3.91922e-05	3.27857e-05
559	4.71144e-05	1.52076e-05	3.15399e-05	2.83956e-05	3.91922e-05	3.22899e-05
560	3.80795e-05	1.3525e-05	2.84906e-05	2.57265e-05	3.60569e-05	2.83757e-05
561	3.81903e-05	1.35897e-05	2.84906e-05	2.57265e-05	3.60569e-05	2.84108e-05
562	3.81349e-05	1.35897e-05	2.84451e-05	2.55783e-05	3.60569e-05	2.8361e-05
563	3.81349e-05	1.35897e-05	2.83996e-05	2.55783e-05	3.60569e-05	2.83519e-05
564	3.50863e-05	1.21013e-05	2.46221e-05	2.35765e-05	3.29215e-05	2.56615e-05
565	1.69612e-05	5.04761e-06	1.24248e-05	1.10468e-05	1.019e-05	1.11341e-05
566	1.70166e-05	5.04761e-06	1.24248e-05	1.09727e-05	9.40614e-06	1.09736e-05
567	1.552e-05	4.14163e-06	1.04223e-05	8.00711e-06	9.40614e-06	9.49944e-06
568	4.15715e-06	7.76556e-07	2.68522e-06	1.63108e-06	3.13538e-06	2.47708e-06
569	4.32344e-06	8.41269e-07	2.45766e-06	1.63108e-06	2.35153e-06	2.321e-06
570	2.10629e-06	3.88278e-07	5.91658e-07	3.70699e-07	1.56769e-06	1.00492e-06
571	3.21486e-06	6.4713e-07	8.19219e-07	5.93119e-07	7.83845e-07	1.21163e-06
572	3.21486e-06	4.52991e-07	7.28194e-07	5.93119e-07	7.83845e-07	1.1546e-06
573	1.01989e-05	1.16483e-06	3.14034e-06	1.1121e-06	7.83845e-07	3.28e-06
574	1.09749e-05	1.22955e-06	3.32239e-06	1.1121e-06	7.83845e-07	3.48456e-06
575	1.06977e-05	1.16483e-06	3.23136e-06	1.1121e-06	7.83845e-07	3.39797e-06
576	1.40235e-05	1.4884e-06	4.00507e-06	1.4828e-06	7.83845e-07	4.35672e-06
577	1.41343e-05	1.4884e-06	3.91404e-06	1.40866e-06	7.83845e-07	4.34585e-06
578	2.23378e-05	2.78266e-06	6.41721e-06	2.5949e-06	0	6.82651e-06
579	2.31692e-05	2.84737e-06	6.64477e-06	2.66904e-06	0	7.06608e-06
580	2.35018e-05	2.91209e-06	6.78131e-06	2.74318e-06	0	7.18768e-06
581	5.25464e-05	6.92429e-06	1.99343e-05	9.48991e-06	2.35153e-06	1.82493e-05
582	5.27681e-05	6.92429e-06	1.99343e-05	9.48991e-06	2.35153e-06	1.82936e-05
583	5.29344e-05	6.92429e-06	1.98888e-05	9.56405e-06	2.35153e-06	1.83326e-05
584	7.79881e-05	9.70695e-06	2.99015e-05	1.40866e-05	4.70307e-06	2.72772e-05
585	7.82098e-05	9.70695e-06	3.00835e-05	1.40866e-05	4.70307e-06	2.7358e-05
586	7.82653e-05	9.70695e-06	3.01746e-05	1.41607e-05	4.70307e-06	2.74021e-05
587	8.00944e-05	9.83638e-06	3.04476e-05	1.45314e-05	4.70307e-06	2.79226e-05
588	8.14801e-05	9.90109e-06	3.06752e-05	1.45314e-05	4.70307e-06	2.82582e-05
589	8.18681e-05	9.9658e-06	3.07207e-05	1.47538e-05	4.70307e-06	2.84023e-05
590	8.26441e-05	1.00305e-05	3.09027e-05	1.4828e-05	4.70307e-06	2.86217e-05
591	8.25333e-05	9.9658e-06	3.10393e-05	1.47538e-05	4.70307e-06	2.85991e-05
592	0.000132197	2.04493e-05	5.55248e-05	3.78855e-05	1.09738e-05	5.14061e-05
593	0.00013835	2.0967e-05	5.89382e-05	4.07769e-05	1.25415e-05	5.43147e-05
594	0.000147828	2.39438e-05	6.45817e-05	4.78944e-05	1.41092e-05	5.96714e-05
595	0.000163903	3.21624e-05	7.96007e-05	5.81998e-05	1.64607e-05	7.00653e-05
596	0.000166231	3.33919e-05	8.28776e-05	5.99792e-05	1.64607e-05	7.17881e-05
597	0.000177815	3.90867e-05	9.5439e-05	6.43534e-05	1.64607e-05	7.8631e-05
598	0.000176651	3.91514e-05	9.43467e-05	6.42793e-05	1.64607e-05	7.81778e-05
599	0.000179367	3.95396e-05	9.56665e-05	6.465e-05	1.64607e-05	7.91368e-05
600	0.000165898	3.63687e-05	8.79295e-05	6.06464e-05	1.64607e-05	7.34607e-05
601	0.000170609	3.65628e-05	8.93859e-05	6.08689e-05	1.64607e-05	7.47775e-05
602	0.000170111	3.63687e-05	8.92038e-05	6.0424e-05	1.64607e-05	7.45136e-05
603	0.000165067	3.59804e-05	8.77474e-05	5.95343e-05	1.4893e-05	7.26444e-05
604	0.00018236	4.14163e-05	9.78511e-05	6.53914e-05	2.19477e-05	8.17933e-05
605	0.000182637	4.14163e-05	9.82152e-05	6.54655e-05	2.27315e-05	8.20931e-05
606	0.00018236	4.1481e-05	9.79877e-05	6.52431e-05	2.27315e-05	8.19607e-05
607	0.000181972	4.1481e-05	9.78966e-05	6.53173e-05	2.27315e-05	8.18797e-05
608	0.000180753	4.13516e-05	9.7578e-05	6.50207e-05	2.27315e-05	8.1487e-05
609	0.000180476	4.13516e-05	9.74415e-05	6.48724e-05	2.27315e-05	8.13746e-05
610	0.000159302	3.94102e-05	9.07057e-05	6.19068e-05	2.5083e-05	7.52815e-05
611	0.000168725	4.29694e-05	9.64858e-05	6.68742e-05	2.58669e-05	8.01843e-05
612	0.000168891	4.30989e-05	9.64858e-05	6.68742e-05	2.58669e-05	8.02434e-05
613	0.000169501	4.31636e-05	9.67133e-05	6.66518e-05	2.58669e-05	8.03793e-05
614	0.000167505	4.3293e-05	9.62582e-05	6.70225e-05	2.27315e-05	7.9362e-05
615	0.000167616	4.36813e-05	9.63492e-05	6.71707e-05	2.19477e-05	7.9353e-05
616	0.000127874	3.22918e-05	7.00887e-05	4.27046e-05	1.64607e-05	5.7884e-05
617	0.000144503	3.91514e-05	8.0602e-05	5.37514e-05	1.80284e-05	6.72072e-05
618	0.000145001	3.92808e-05	8.15123e-05	5.41963e-05	1.80284e-05	6.76038e-05
619	0.000143172	3.90219e-05	8.02834e-05	5.301e-05	1.72446e-05	6.65464e-05
620	0.000143172	3.88925e-05	8.03289e-05	5.301e-05	1.88123e-05	6.68431e-05
621	0.000140456	3.77277e-05	7.82809e-05	5.16014e-05	1.88123e-05	6.53757e-05
622	0.000139791	3.75335e-05	7.72796e-05	5.0341e-05	1.88123e-05	6.47515e-05
623	8.49721e-05	2.3232e-05	4.07334e-05	3.05456e-05	1.17577e-05	3.82482e-05
624	9.05704e-05	2.40732e-05	4.32821e-05	3.11388e-05	1.33254e-05	4.0478e-05
625	8.8575e-05	2.37497e-05	4.28269e-05	3.07681e-05	1.33254e-05	3.9849e-05
626	7.87087e-05	2.29084e-05	4.06423e-05	2.99525e-05	1.33254e-05	3.71075e-05
627	0.000102765	3.38449e-05	5.80735e-05	3.98131e-05	1.88123e-05	5.06618e-05
628	0.000103042	3.41038e-05	5.83011e-05	3.99614e-05	1.88123e-05	5.08441e-05
629	0.000103042	3.41038e-05	5.83466e-05	3.99614e-05	1.88123e-05	5.08532e-05
630	0.000103153	3.39743e-05	5.83011e-05	3.9739e-05	1.88123e-05	5.07959e-05
631	0.000101102	3.3586e-05	5.67537e-05	3.72182e-05	1.88123e-05	4.94944e-05
632	0.000101102	3.3586e-05	5.67537e-05	3.70699e-05	1.88123e-05	4.94648e-05
633	0.00010088	3.34566e-05	5.66171e-05	3.69217e-05	1.88123e-05	4.93375e-05
634	9.31202e-05	3.03504e-05	5.15198e-05	3.32888e-05	1.88123e-05	4.54183e-05
635	9.2843e-05	3.00268e-05	5.12922e-05	3.31405e-05	1.88123e-05	4.5223e-05
636	8.99053e-05	2.85384e-05	4.93807e-05	3.1287e-05	1.80284e-05	4.3428e-05
637	6.98401e-05	2.13553e-05	3.90949e-05	2.50593e-05	1.80284e-05	3.46756e-05
638	8.52493e-05	3.37155e-05	5.34313e-05	3.46233e-05	2.74346e-05	4.68908e-05
639	8.60253e-05	3.39743e-05	5.41595e-05	3.47716e-05	2.74346e-05	4.72731e-05
640	8.8187e-05	3.52686e-05	5.59344e-05	3.68475e-05	2.97861e-05	4.92047e-05
641	8.0039e-05	3.30683e-05	5.12467e-05	3.42526e-05	2.82184e-05	4.5365e-05
642	8.2755e-05	3.88278e-05	5.68447e-05	3.75889e-05	2.35153e-05	4.79063e-05
643	8.41407e-05	3.92161e-05	5.78004e-05	3.78855e-05	2.35153e-05	4.85116e-05
644	8.3919e-05	3.92161e-05	5.76184e-05	3.78113e-05	2.35153e-05	4.8416e-05
645	8.3919e-05	3.90219e-05	5.74818e-05	3.75889e-05	2.35153e-05	4.83054e-05
646	7.0339e-05	3.28742e-05	4.62859e-05	3.15095e-05	1.80284e-05	3.98074e-05
647	7.35538e-05	3.37155e-05	4.75602e-05	3.21026e-05	1.80284e-05	4.09921e-05
648	7.36093e-05	3.37155e-05	4.76057e-05	3.20284e-05	1.80284e-05	4.09975e-05
649	7.37755e-05	3.36508e-05	4.76512e-05	3.19543e-05	1.88123e-05	4.11688e-05
650	7.37201e-05	3.36508e-05	4.76057e-05	3.19543e-05	1.88123e-05	4.11486e-05
651	7.36647e-05	3.36508e-05	4.75602e-05	3.19543e-05	1.88123e-05	4.11285e-05
652	7.2667e-05	3.32625e-05	4.71506e-05	3.15095e-05	1.88123e-05	4.06804e-05
653	7.2667e-05	3.32625e-05	4.71506e-05	3.15095e-05	1.88123e-05	4.06804e-05
654	7.17801e-05	3.29389e-05	4.6741e-05	3.06939e-05	1.88123e-05	4.01932e-05
655	7.17801e-05	3.28742e-05	4.66955e-05	3.06198e-05	1.88123e-05	4.01564e-05
656	7.12258e-05	3.26154e-05	4.59673e-05	3.03232e-05	1.80284e-05	3.9632e-05
657	4.81675e-05	2.12259e-05	2.82175e-05	2.00178e-05	1.41092e-05	2.63476e-05
658	4.97195e-05	2.14847e-05	2.86271e-05	1.99436e-05	1.41092e-05	2.67768e-05
659	4.96641e-05	2.12259e-05	2.83541e-05	1.97212e-05	1.33254e-05	2.64581e-05
660	4.91098e-05	2.07082e-05	2.77624e-05	1.89057e-05	1.33254e-05	2.59623e-05
661	4.72806e-05	2.0061e-05	2.6215e-05	1.76453e-05	1.33254e-05	2.49055e-05
662	1.40789e-05	3.04151e-06	5.05185e-06	3.26216e-06	4.70307e-06	6.0275e-06
663	2.11737e-05	5.82417e-06	9.32999e-06	6.00533e-06	4.70307e-06	9.40725e-06
664	2.35572e-05	6.40659e-06	1.09684e-05	7.48813e-06	4.70307e-06	1.06247e-05
665	2.4832e-05	6.73015e-06	1.16511e-05	7.56227e-06	5.48691e-06	1.12525e-05
666	2.51092e-05	6.73015e-06	1.18332e-05	7.56227e-06	5.48691e-06	1.13443e-05
667	2.51092e-05	6.73015e-06	1.18332e-05	7.56227e-06	5.48691e-06	1.13443e-05
668	2.33355e-05	6.34187e-06	1.14235e-05	6.89501e-06	4.70307e-06	1.05398e-05
669	2.6772e-05	7.57142e-06	1.23793e-05	7.48813e-06	4.70307e-06	1.17828e-05
670	2.69938e-05	7.57142e-06	1.25158e-05	7.56227e-06	4.70307e-06	1.18693e-05
671	2.70492e-05	7.57142e-06	1.25158e-05	7.56227e-06	4.70307e-06	1.18804e-05
672	2.72155e-05	7.57142e-06	1.26069e-05	7.63641e-06	4.70307e-06	1.19467e-05
673	2.73818e-05	7.57142e-06	1.26069e-05	7.63641e-06	4.70307e-06	1.19799e-05
674	2.73818e-05	7.57142e-06	1.26524e-05	7.63641e-06	4.70307e-06	1.1989e-05
675	2.72155e-05	7.50671e-06	1.26069e-05	7.63641e-06	4.70307e-06	1.19337e-05
676	2.71046e-05	7.57142e-06	1.26069e-05	7.48813e-06	4.70307e-06	1.18948e-05
677	2.71046e-05	7.57142e-06	1.26069e-05	7.41399e-06	4.70307e-06	1.188e-05
678	2.69938e-05	7.442e-06	1.24703e-05	7.33985e-06	4.70307e-06	1.17898e-05
679	2.32246e-05	6.73015e-06	1.06498e-05	6.52431e-06	7.83845e-07	9.58254e-06
680	2.35018e-05	6.79487e-06	1.06954e-05	6.52431e-06	7.83845e-07	9.66005e-06
681	2.1728e-05	6.53601e-06	1.02402e-05	6.45017e-06	7.83845e-07	9.14765e-06
682	2.25595e-05	6.66544e-06	1.05588e-05	6.45017e-06	7.83845e-07	9.40355e-06
683	2.2504e-05	6.60073e-06	1.03768e-05	6.37603e-06	7.83845e-07	9.32828e-06
684	1.81806e-05	5.24175e-06	7.32746e-06	4.07769e-06	7.83845e-07	7.12227e-06
685	2.10075e-05	5.43589e-06	8.10116e-06	4.22597e-06	7.83845e-07	7.91087e-06
686	2.10075e-05	5.43589e-06	8.14667e-06	4.22597e-06	7.83845e-07	7.91998e-06
687	2.07857e-05	5.37118e-06	8.05565e-06	4.15183e-06	7.83845e-07	7.82964e-06
688	1.6684e-05	3.10622e-06	5.78004e-06	1.8535e-06	7.83845e-07	5.64152e-06
689	1.8236e-05	3.36508e-06	6.28068e-06	1.92764e-06	7.83845e-07	6.11865e-06
690	1.8236e-05	3.36508e-06	6.28068e-06	1.92764e-06	7.83845e-07	6.11865e-06
691	1.60189e-05	2.78266e-06	5.14287e-06	1.40866e-06	7.83845e-07	5.22739e-06
692	1.74046e-05	3.10622e-06	5.64351e-06	1.4828e-06	7.83845e-07	5.6842e-06
693	1.74046e-05	3.10622e-06	5.64351e-06	1.4828e-06	7.83845e-07	5.6842e-06
694	1.71275e-05	2.91209e-06	5.50697e-06	1.33452e-06	7.83845e-07	5.53299e-06
695	1.67395e-05	2.71795e-06	5.32492e-06	1.33452e-06	7.83845e-07	5.38015e-06
696	1.69612e-05	2.71795e-06	5.41595e-06	1.33452e-06	7.83845e-07	5.44269e-06
697	1.68503e-05	2.65323e-06	5.37043e-06	1.33452e-06	7.83845e-07	5.39847e-06
698	1.29703e-05	1.81196e-06	3.50444e-06	1.03796e-06	7.83845e-07	4.0217e-06
699	1.47995e-05	1.87668e-06	4.05058e-06	1.1121e-06	0	4.36777e-06
700	1.44669e-05	1.68254e-06	3.91404e-06	1.1121e-06	0	4.23512e-06
701	1.9012e-05	2.65323e-06	6.14414e-06	2.00178e-06	0	5.96223e-06
702	1.90675e-05	2.65323e-06	6.14414e-06	2.00178e-06	0	5.97333e-06
703	1.90675e-05	2.65323e-06	6.14414e-06	2.00178e-06	0	5.97333e-06
704	1.90675e-05	2.65323e-06	6.14414e-06	2.00178e-06	0	5.97333e-06
705	1.89566e-05	2.65323e-06	6.14414e-06	2.00178e-06	0	5.95115e-06
706	1.89012e-05	2.65323e-06	6.09863e-06	2.00178e-06	0	5.93097e-06
707	1.552e-05	2.07082e-06	4.68775e-06	1.40866e-06	0	4.73745e-06
708	2.03977e-05	2.52381e-06	6.14414e-06	2.37248e-06	2.35153e-06	6.75793e-06
709	2.06195e-05	2.52381e-06	6.09863e-06	2.37248e-06	2.35153e-06	6.79319e-06
710	1.91783e-05	2.52381e-06	5.68902e-06	2.2242e-06	2.35153e-06	6.39337e-06
711	2.65503e-05	3.55922e-06	8.41975e-06	3.48458e-06	3.91922e-06	9.18661e-06
712	2.65503e-05	3.55922e-06	8.41975e-06	3.48458e-06	3.91922e-06	9.18661e-06
713	2.64949e-05	3.55922e-06	8.37424e-06	3.48458e-06	3.91922e-06	9.16643e-06
714	2.62732e-05	3.55922e-06	8.37424e-06	3.3363e-06	3.91922e-06	9.09244e-06
715	2.93218e-05	3.94749e-06	9.64858e-06	3.92941e-06	3.91922e-06	1.01533e-05
716	2.93772e-05	3.94749e-06	9.64858e-06	3.92941e-06	3.91922e-06	1.01644e-05
717	2.91555e-05	4.01221e-06	9.51204e-06	3.92941e-06	3.91922e-06	1.01057e-05
718	2.92109e-05	3.94749e-06	9.7396e-06	4.00355e-06	3.91922e-06	1.01642e-05
719	2.76035e-05	3.81807e-06	9.46653e-06	4.00355e-06	3.91922e-06	9.76217e-06
720	3.65275e-05	6.60073e-06	1.39722e-05	6.00533e-06	5.48691e-06	1.37185e-05
721	3.67492e-05	6.60073e-06	1.40177e-05	6.00533e-06	6.27076e-06	1.39287e-05
722	3.74698e-05	6.66544e-06	1.41998e-05	6.07947e-06	6.27076e-06	1.41371e-05
723	3.74698e-05	6.66544e-06	1.41998e-05	6.07947e-06	6.27076e-06	1.41371e-05
724	3.66938e-05	6.4713e-06	1.37902e-05	6.00533e-06	6.27076e-06	1.38463e-05
725	3.64166e-05	6.40659e-06	1.36081e-05	6.00533e-06	6.27076e-06	1.37415e-05
726	3.41995e-05	6.27716e-06	1.26524e-05	5.78291e-06	6.27076e-06	1.30365e-05
727	3.40332e-05	6.27716e-06	1.26524e-05	5.78291e-06	6.27076e-06	1.30033e-05
728	3.32018e-05	6.27716e-06	1.22428e-05	5.41221e-06	6.27076e-06	1.26809e-05
729	3.20378e-05	6.21245e-06	1.17876e-05	5.26393e-06	5.48691e-06	1.21577e-05
730	2.49429e-05	4.91819e-06	9.87614e-06	4.00355e-06	3.91922e-06	9.532e-06
731	2.47212e-05	4.91819e-06	9.87614e-06	4.00355e-06	3.91922e-06	9.48766e-06
732	2.25595e-05	4.27106e-06	8.92038e-06	3.63286e-06	3.13538e-06	8.50384e-06
733	2.26703e-05	4.27106e-06	8.87487e-06	3.55872e-06	3.13538e-06	8.50207e-06
734	2.12846e-05	4.20635e-06	8.73833e-06	3.41044e-06	3.13538e-06	8.15502e-06
735	2.15063e-05	4.20635e-06	8.78384e-06	3.41044e-06	3.13538e-06	8.20846e-06
736	2.134e-05	4.20635e-06	8.78384e-06	3.41044e-06	3.13538e-06	8.1752e-06
737	2.07303e-05	4.14163e-06	8.2377e-06	3.18802e-06	3.13538e-06	7.88661e-06
738	2.07857e-05	4.14163e-06	8.2377e-06	3.18802e-06	3.13538e-06	7.89769e-06
739	2.0564e-05	4.07692e-06	8.14667e-06	3.11388e-06	3.13538e-06	7.80737e-06
740	2.0176e-05	4.01221e-06	8.01014e-06	2.89146e-06	3.13538e-06	7.64504e-06
741	1.92892e-05	3.94749e-06	7.60053e-06	2.66904e-06	3.13538e-06	7.32833e-06
742	1.89012e-05	3.94749e-06	7.55502e-06	2.66904e-06	3.13538e-06	7.24163e-06
743	1.71829e-05	3.68864e-06	7.0999e-06	2.5949e-06	3.13538e-06	6.74034e-06
744	1.70166e-05	3.68864e-06	7.00887e-06	2.5949e-06	3.13538e-06	6.68888e-06
745	1.68503e-05	3.68864e-06	7.00887e-06	2.5949e-06	2.35153e-06	6.49885e-06
746	1.37463e-05	3.23565e-06	5.64351e-06	2.07592e-06	1.56769e-06	5.25381e-06
747	6.20801e-06	1.94139e-06	3.91404e-06	1.55694e-06	1.56769e-06	3.03761e-06
748	9.36744e-06	2.20024e-06	4.64224e-06	1.63108e-06	1.56769e-06	3.88174e-06
749	9.14573e-06	2.20024e-06	4.64224e-06	1.55694e-06	1.56769e-06	3.82257e-06
750	9.81087e-06	2.20024e-06	4.91531e-06	1.55694e-06	1.56769e-06	4.01021e-06
751	9.70002e-06	2.07082e-06	4.82429e-06	1.40866e-06	1.56769e-06	3.9143e-06
752	9.8663e-06	2.07082e-06	5.00634e-06	1.40866e-06	1.56769e-06	3.98396e-06
753	9.8663e-06	2.07082e-06	4.96082e-06	1.40866e-06	1.56769e-06	3.97486e-06
754	9.92173e-06	1.94139e-06	4.96082e-06	1.40866e-06	1.56769e-06	3.96006e-06
755	8.75773e-06	8.41269e-07	3.32239e-06	3.70699e-07	1.56769e-06	2.97196e-06
756	8.75773e-06	8.41269e-07	3.32239e-06	3.70699e-07	1.56769e-06	2.97196e-06
757	8.48059e-06	8.41269e-07	3.23136e-06	3.70699e-07	1.56769e-06	2.89832e-06
758	8.48059e-06	8.41269e-07	3.23136e-06	3.70699e-07	1.56769e-06	2.89832e-06
759	6.7623e-06	7.76556e-07	2.54868e-06	1.4828e-07	7.83845e-07	2.20393e-06
760	6.7623e-06	7.76556e-07	2.54868e-06	1.4828e-07	0	2.04716e-06
761	6.7623e-06	7.76556e-07	2.54868e-06	1.4828e-07	0	2.04716e-06
762	6.70687e-06	7.76556e-07	2.54868e-06	1.4828e-07	0	2.03608e-06
763	6.54058e-06	7.76556e-07	2.36663e-06	1.4828e-07	0	1.96641e-06
764	6.59601e-06	7.76556e-07	2.36663e-06	1.4828e-07	0	1.9775e-06
765	6.3743e-06	5.82417e-07	2.2301e-06	1.4828e-07	0	1.86702e-06
766	6.48515e-06	5.82417e-07	2.2301e-06	1.4828e-07	0	1.88919e-06
767	6.15258e-06	5.17704e-07	2.13907e-06	1.4828e-07	0	1.79153e-06
768	6.3743e-06	5.17704e-07	2.13907e-06	1.4828e-07	0	1.83587e-06
769	6.3743e-06	5.17704e-07	2.13907e-06	1.4828e-07	0	1.83587e-06
770	6.3743e-06	5.17704e-07	1.95702e-06	1.4828e-07	0	1.79946e-06
771	6.42972e-06	5.17704e-07	2.00253e-06	1.4828e-07	0	1.81965e-06
772	6.3743e-06	3.23565e-07	1.866e-06	1.4828e-07	0	1.74243e-06
773	6.04172e-06	3.23565e-07	1.59293e-06	7.41399e-08	0	1.60647e-06
774	5.82001e-06	2.58852e-07	1.59293e-06	7.41399e-08	0	1.54919e-06
775	6.70687e-06	3.88278e-07	1.82049e-06	7.41399e-08	0	1.79796e-06
776	6.65144e-06	3.88278e-07	1.82049e-06	7.41399e-08	0	1.78687e-06
777	6.7623e-06	4.52991e-07	1.91151e-06	7.41399e-08	0	1.84019e-06
778	6.7623e-06	4.52991e-07	1.91151e-06	7.41399e-08	0	1.84019e-06
779	6.7623e-06	4.52991e-07	1.91151e-06	7.41399e-08	0	1.84019e-06
780	6.87315e-06	4.52991e-07	1.91151e-06	7.41399e-08	0	1.86236e-06
781	7.87087e-06	5.82417e-07	2.2301e-06	2.9656e-07	0	2.19599e-06
782	7.87087e-06	5.82417e-07	2.2301e-06	2.9656e-07	0	2.19599e-06
783	8.36973e-06	1.29426e-06	2.68522e-06	8.89679e-07	7.83845e-07	2.80455e-06
784	8.53601e-06	1.42369e-06	2.68522e-06	8.89679e-07	7.83845e-07	2.86369e-06
785	8.59144e-06	1.42369e-06	2.68522e-06	8.89679e-07	7.83845e-07	2.87477e-06
786	8.59144e-06	1.42369e-06	2.68522e-06	8.89679e-07	7.83845e-07	2.87477e-06
787	8.59144e-06	1.4884e-06	2.68522e-06	8.89679e-07	7.83845e-07	2.88772e-06
788	8.59144e-06	1.4884e-06	2.68522e-06	8.89679e-07	7.83845e-07	2.88772e-06
789	9.0903e-06	1.74725e-06	3.14034e-06	1.26038e-06	7.83845e-07	3.20442e-06
790	8.75773e-06	1.74725e-06	3.09483e-06	1.26038e-06	7.83845e-07	3.12881e-06
791	9.0903e-06	2.07082e-06	3.41341e-06	1.40866e-06	7.83845e-07	3.35341e-06
792	7.48287e-06	2.07082e-06	2.73073e-06	1.33452e-06	7.83845e-07	2.88056e-06
793	9.42287e-06	2.26496e-06	3.04931e-06	1.33452e-06	7.83845e-07	3.3711e-06
794	9.42287e-06	2.26496e-06	3.04931e-06	1.33452e-06	7.83845e-07	3.3711e-06
795	9.42287e-06	2.26496e-06	3.09483e-06	1.33452e-06	7.83845e-07	3.38021e-06
796	9.03487e-06	2.20024e-06	2.95829e-06	1.33452e-06	7.83845e-07	3.26235e-06
797	9.81087e-06	2.26496e-06	3.54995e-06	1.70522e-06	7.83845e-07	3.62297e-06
798	8.09258e-06	2.13553e-06	3.32239e-06	1.77936e-06	7.83845e-07	3.22274e-06
799	1.68503e-05	3.4945e-06	6.28068e-06	2.5949e-06	3.13538e-06	6.47115e-06
800	1.65732e-05	3.4945e-06	6.50824e-06	2.5949e-06	3.13538e-06	6.46124e-06
801	4.14606e-05	2.58852e-05	3.58636e-05	2.15747e-05	1.72446e-05	2.84057e-05
802	4.51744e-05	2.99621e-05	4.33276e-05	2.64679e-05	1.88123e-05	3.27489e-05
803	4.56178e-05	3.1127e-05	4.41013e-05	2.66904e-05	2.038e-05	3.35833e-05
804	4.83892e-05	3.30683e-05	4.74237e-05	2.92853e-05	2.038e-05	3.57093e-05
805	4.88881e-05	3.33272e-05	4.76512e-05	2.95077e-05	2.038e-05	3.59508e-05
806	4.91098e-05	3.33272e-05	4.76967e-05	2.95077e-05	2.038e-05	3.60043e-05
807	4.97749e-05	3.3586e-05	4.81063e-05	2.9656e-05	2.038e-05	3.63006e-05
808	5.11052e-05	3.39096e-05	4.888e-05	2.98042e-05	2.038e-05	3.68158e-05
809	5.14378e-05	3.39096e-05	4.90621e-05	2.99525e-05	2.038e-05	3.69484e-05
810	5.22138e-05	3.42979e-05	4.99268e-05	3.03232e-05	2.11638e-05	3.75851e-05
811	5.22692e-05	3.44273e-05	4.99723e-05	3.03232e-05	2.11638e-05	3.76312e-05
812	5.23247e-05	3.44273e-05	4.99723e-05	3.03232e-05	2.11638e-05	3.76423e-05
813	5.27681e-05	3.4492e-05	5.01544e-05	3.03974e-05	2.11638e-05	3.77951e-05
814	6.77338e-05	4.16752e-05	6.06677e-05	3.58096e-05	2.42992e-05	4.60371e-05
815	6.85098e-05	4.18693e-05	6.11683e-05	3.58837e-05	2.42992e-05	4.63461e-05
816	7.00064e-05	4.20635e-05	6.20331e-05	3.61803e-05	2.42992e-05	4.69165e-05
817	7.0339e-05	4.20635e-05	6.21241e-05	3.61803e-05	2.42992e-05	4.70012e-05
818	7.2279e-05	4.25812e-05	6.38991e-05	3.64027e-05	2.42992e-05	4.78922e-05
819	7.25007e-05	4.25812e-05	6.39901e-05	3.64027e-05	2.42992e-05	4.79548e-05
820	7.27224e-05	4.25812e-05	6.40356e-05	3.64027e-05	2.42992e-05	4.80082e-05
821	7.27224e-05	4.25812e-05	6.40356e-05	3.64027e-05	2.42992e-05	4.80082e-05
822	6.82327e-05	3.7663e-05	5.78004e-05	3.21026e-05	2.11638e-05	4.33925e-05
823	6.43527e-05	3.54627e-05	5.40684e-05	2.98784e-05	1.80284e-05	4.03581e-05
824	4.61166e-05	2.60146e-05	3.86853e-05	2.15747e-05	1.09738e-05	2.8673e-05
825	5.39875e-05	2.71795e-05	4.1325e-05	2.27609e-05	1.17577e-05	3.14021e-05
826	5.38767e-05	2.68559e-05	4.1143e-05	2.24644e-05	1.17577e-05	3.12195e-05
827	5.40429e-05	2.68559e-05	4.11885e-05	2.23902e-05	1.17577e-05	3.1247e-05
828	5.39875e-05	2.66618e-05	4.10064e-05	2.23161e-05	1.17577e-05	3.11459e-05
829	5.18258e-05	2.0514e-05	3.47713e-05	1.80901e-05	9.40614e-06	2.69215e-05
830	4.78904e-05	1.50134e-05	2.86727e-05	1.26779e-05	7.0546e-06	2.22618e-05
831	4.96087e-05	1.50781e-05	2.92643e-05	1.27521e-05	7.0546e-06	2.27516e-05
832	4.96641e-05	1.50781e-05	2.92188e-05	1.27521e-05	7.0546e-06	2.27535e-05
833	4.46755e-05	1.06129e-05	2.29381e-05	9.86061e-06	7.0546e-06	1.90283e-05
834	3.19823e-05	5.88888e-06	1.57927e-05	5.63463e-06	2.35153e-06	1.233e-05
835	3.58069e-05	5.9536e-06	1.67485e-05	5.93119e-06	2.35153e-06	1.33583e-05
836	3.60841e-05	5.88888e-06	1.6976e-05	5.93119e-06	2.35153e-06	1.34463e-05
837	3.57515e-05	5.75946e-06	1.66574e-05	5.85705e-06	2.35153e-06	1.32754e-05
838	3.56961e-05	5.75946e-06	1.65209e-05	5.85705e-06	2.35153e-06	1.3237e-05
839	3.29801e-05	4.91819e-06	1.36536e-05	4.89323e-06	2.35153e-06	1.17593e-05
840	2.24486e-05	3.04151e-06	7.8736e-06	3.18802e-06	2.35153e-06	7.78065e-06
841	3.44766e-05	4.9829e-06	1.40633e-05	4.07769e-06	2.35153e-06	1.19904e-05
842	3.54743e-05	4.91819e-06	1.41543e-05	4.37425e-06	2.35153e-06	1.22545e-05
843	3.54189e-05	4.91819e-06	1.44274e-05	4.52253e-06	2.35153e-06	1.23277e-05
844	3.51418e-05	4.4652e-06	1.44729e-05	4.30011e-06	2.35153e-06	1.21463e-05
845	3.0264e-05	3.04151e-06	1.22883e-05	3.48458e-06	7.83845e-07	9.97245e-06
846	3.49201e-05	4.01221e-06	1.5019e-05	5.48635e-06	7.83845e-07	1.20443e-05
847	3.36452e-05	3.94749e-06	1.45639e-05	5.18979e-06	7.83845e-07	1.1626e-05
848	4.70589e-05	7.442e-06	2.08901e-05	1.14175e-05	3.13538e-06	1.79888e-05
849	4.86109e-05	7.57142e-06	2.17093e-05	1.17141e-05	3.13538e-06	1.85482e-05
850	4.85555e-05	7.442e-06	2.13907e-05	1.164e-05	2.35153e-06	1.82759e-05
851	4.97749e-05	7.442e-06	2.15272e-05	1.18624e-05	2.35153e-06	1.85916e-05
852	4.81675e-05	7.24786e-06	2.12087e-05	1.18624e-05	2.35153e-06	1.81676e-05
853	5.47635e-05	9.51281e-06	2.53503e-05	1.47538e-05	2.35153e-06	2.13464e-05
854	5.48189e-05	9.4481e-06	2.53503e-05	1.47538e-05	2.35153e-06	2.13445e-05
855	5.49298e-05	9.4481e-06	2.54868e-05	1.4828e-05	2.35153e-06	2.14088e-05
856	5.49852e-05	9.4481e-06	2.54868e-05	1.4828e-05	2.35153e-06	2.14199e-05
857	5.45972e-05	9.4481e-06	2.55323e-05	1.4828e-05	2.35153e-06	2.13514e-05
858	5.45972e-05	9.4481e-06	2.55323e-05	1.4828e-05	2.35153e-06	2.13514e-05
859	5.45972e-05	9.4481e-06	2.54868e-05	1.4828e-05	2.35153e-06	2.13423e-05
860	5.35441e-05	9.38339e-06	2.49862e-05	1.47538e-05	2.35153e-06	2.10038e-05
861	5.03847e-05	8.54212e-06	2.30291e-05	1.44573e-05	2.35153e-06	1.9753e-05
862	5.26018e-05	8.93039e-06	2.37573e-05	1.4828e-05	3.13538e-06	2.06506e-05
863	5.24909e-05	8.86568e-06	2.37573e-05	1.4828e-05	3.13538e-06	2.06155e-05
864	5.22692e-05	8.86568e-06	2.36663e-05	1.47538e-05	3.13538e-06	2.05381e-05
865	5.22692e-05	8.86568e-06	2.36208e-05	1.47538e-05	3.13538e-06	2.0529e-05
866	5.18258e-05	8.67154e-06	2.34843e-05	1.47538e-05	3.13538e-06	2.03742e-05
867	3.44766e-05	4.52991e-06	1.14691e-05	6.67259e-06	2.35153e-06	1.18999e-05
868	3.47538e-05	4.65934e-06	1.17421e-05	6.74673e-06	2.35153e-06	1.20507e-05
869	3.44212e-05	4.59462e-06	1.18332e-05	6.82087e-06	2.35153e-06	1.20043e-05
870	3.42549e-05	4.59462e-06	1.18332e-05	6.82087e-06	2.35153e-06	1.1971e-05
871	2.84903e-05	4.20635e-06	9.19345e-06	5.70877e-06	1.56769e-06	9.83331e-06
872	2.83795e-05	4.14163e-06	9.19345e-06	5.63463e-06	1.56769e-06	9.78338e-06
873	2.68275e-05	3.81807e-06	8.51077e-06	5.26393e-06	1.56769e-06	9.19759e-06
874	1.60743e-05	1.61783e-06	5.50697e-06	2.74318e-06	1.56769e-06	5.50199e-06
875	1.58526e-05	1.55311e-06	5.37043e-06	2.74318e-06	1.56769e-06	5.4174e-06
876	1.22497e-05	1.29426e-06	4.23263e-06	1.92764e-06	1.56769e-06	4.25438e-06
877	1.29149e-05	1.42369e-06	4.46019e-06	1.8535e-06	1.56769e-06	4.44399e-06
878	1.25823e-05	1.29426e-06	4.41468e-06	1.77936e-06	1.56769e-06	4.32766e-06
879	1.10857e-05	1.22955e-06	3.732e-06	1.40866e-06	1.56769e-06	3.80472e-06
880	1.29149e-05	1.42369e-06	4.27814e-06	1.70522e-06	1.56769e-06	4.37793e-06
881	1.29149e-05	1.42369e-06	4.27814e-06	1.70522e-06	1.56769e-06	4.37793e-06
882	1.29149e-05	1.42369e-06	4.27814e-06	1.70522e-06	1.56769e-06	4.37793e-06
883	1.19172e-05	1.42369e-06	4.09609e-06	1.70522e-06	1.56769e-06	4.14198e-06
884	9.31202e-06	1.22955e-06	3.82302e-06	1.63108e-06	7.83845e-07	3.3559e-06
885	9.70002e-06	1.22955e-06	3.82302e-06	1.8535e-06	7.83845e-07	3.47799e-06
886	5.59829e-06	7.76556e-07	1.95702e-06	1.40866e-06	7.83845e-07	2.10487e-06
887	7.5383e-06	9.05982e-07	2.82175e-06	1.77936e-06	0	2.60908e-06
888	7.03944e-06	7.11843e-07	2.68522e-06	1.70522e-06	0	2.42834e-06
889	6.48515e-06	7.11843e-07	2.50317e-06	1.33452e-06	0	2.20694e-06
890	8.09258e-06	7.76556e-07	2.77624e-06	1.33452e-06	0	2.59598e-06
891	8.09258e-06	7.76556e-07	2.77624e-06	1.33452e-06	0	2.59598e-06
892	8.3143e-06	8.41269e-07	2.86727e-06	1.40866e-06	0	2.6863e-06
893	8.03716e-06	7.76556e-07	2.73073e-06	1.40866e-06	0	2.59062e-06
894	1.30812e-05	1.35897e-06	4.55121e-06	1.8535e-06	0	4.16898e-06
895	1.3192e-05	1.35897e-06	4.55121e-06	1.8535e-06	0	4.19114e-06
896	1.33029e-05	1.35897e-06	4.64224e-06	1.8535e-06	0	4.23152e-06
897	1.33583e-05	1.35897e-06	4.64224e-06	1.8535e-06	0	4.2426e-06
898	1.31366e-05	1.29426e-06	4.5057e-06	1.8535e-06	0	4.15801e-06
899	1.3192e-05	1.29426e-06	4.46019e-06	1.77936e-06	0	4.14516e-06
900	1.33029e-05	1.4884e-06	4.36917e-06	2.00178e-06	0	4.23245e-06
901	1.23052e-05	1.4884e-06	4.18712e-06	1.77936e-06	0	3.95202e-06
902	4.99967e-05	7.37728e-06	1.94792e-05	1.04537e-05	6.27076e-06	1.87155e-05
903	5.14932e-05	7.57142e-06	2.01164e-05	1.08986e-05	6.27076e-06	1.92701e-05
904	5.21029e-05	7.57142e-06	2.01619e-05	1.10468e-05	7.0546e-06	1.95875e-05
905	5.22138e-05	7.57142e-06	2.01164e-05	1.10468e-05	7.0546e-06	1.96006e-05
906	5.59829e-05	7.9597e-06	2.12997e-05	1.1121e-05	7.83845e-06	2.08404e-05
907	5.60938e-05	8.02441e-06	2.12087e-05	1.10468e-05	7.83845e-06	2.08424e-05
908	7.86533e-05	1.10012e-05	2.9947e-05	1.97954e-05	1.17577e-05	3.02309e-05
909	7.97064e-05	1.10012e-05	3.03566e-05	1.98695e-05	1.17577e-05	3.05383e-05
910	8.44733e-05	1.28132e-05	3.48168e-05	2.44662e-05	1.17577e-05	3.36654e-05
911	8.53047e-05	1.30073e-05	3.54995e-05	2.4911e-05	1.17577e-05	3.4096e-05
912	8.56373e-05	1.3072e-05	3.54995e-05	2.50593e-05	1.17577e-05	3.42052e-05
913	8.40298e-05	1.28779e-05	3.47258e-05	2.4911e-05	1.17577e-05	3.36604e-05
914	0.00011252	3.48156e-05	6.22151e-05	5.36031e-05	1.88123e-05	5.63932e-05
915	0.000115901	3.68864e-05	6.65843e-05	5.84964e-05	1.95961e-05	5.94928e-05
916	0.000116511	3.74041e-05	6.76311e-05	5.94602e-05	1.95961e-05	6.01205e-05
917	0.000118008	3.85042e-05	6.9133e-05	6.07206e-05	1.95961e-05	6.11924e-05
918	0.000117952	3.86337e-05	6.91785e-05	6.0943e-05	1.95961e-05	6.12607e-05
919	0.000115458	3.83101e-05	6.81317e-05	6.10913e-05	1.95961e-05	6.05174e-05
920	0.000141232	4.08339e-05	7.97373e-05	6.58362e-05	2.038e-05	6.96039e-05
921	0.0001455	4.1481e-05	8.18308e-05	6.62069e-05	2.038e-05	7.10797e-05
922	0.000140955	3.99279e-05	7.88726e-05	6.34638e-05	1.95961e-05	6.85631e-05
923	0.000195552	5.57826e-05	0.000114736	7.56968e-05	2.35153e-05	9.30565e-05
924	0.000198047	5.62356e-05	0.000116101	7.59934e-05	2.35153e-05	9.39785e-05
925	0.00020043	5.68827e-05	0.000117512	7.61417e-05	2.35153e-05	9.48963e-05
926	0.000200929	5.69474e-05	0.000117649	7.61417e-05	2.35153e-05	9.50365e-05
927	0.000200818	5.66239e-05	0.000117194	7.56968e-05	2.35153e-05	9.47696e-05
928	0.000201428	5.66239e-05	0.000117512	7.56968e-05	2.35153e-05	9.49552e-05
929	0.000201206	5.65592e-05	0.000117512	7.55486e-05	2.35153e-05	9.48682e-05
930	0.00020043	5.64297e-05	0.000116966	7.4733e-05	2.35153e-05	9.44148e-05
931	0.000200153	5.6365e-05	0.000116739	7.41399e-05	2.35153e-05	9.41824e-05
932	0.000199876	5.62356e-05	0.000116739	7.39916e-05	2.35153e-05	9.40715e-05
933	0.000199654	5.5912e-05	0.000115965	7.29537e-05	2.27315e-05	9.34432e-05
934	0.000194555	5.18351e-05	0.000110412	6.62069e-05	1.95961e-05	8.8521e-05
935	0.000192337	4.97643e-05	0.0001075	6.25741e-05	1.72446e-05	8.5884e-05
936	0.00018818	4.69816e-05	0.000102721	5.75326e-05	1.33254e-05	8.17481e-05
937	0.000172328	3.6304e-05	8.64731e-05	4.26304e-05	1.17577e-05	6.98986e-05
938	0.000133417	2.30378e-05	6.22151e-05	2.18713e-05	4.70307e-06	4.90489e-05
939	0.000152484	2.86679e-05	7.50495e-05	2.8099e-05	1.33254e-05	5.95252e-05
940	0.000152595	2.86679e-05	7.51861e-05	2.8099e-05	1.33254e-05	5.95747e-05
941	0.000151099	2.78913e-05	7.41848e-05	2.758e-05	1.41092e-05	5.89729e-05
942	0.000149048	2.705e-05	7.13631e-05	2.72835e-05	1.41092e-05	5.77708e-05
943	0.000122442	1.86373e-05	5.22935e-05	2.07592e-05	1.33254e-05	4.54915e-05
944	0.000130091	2.39438e-05	5.98485e-05	2.60231e-05	1.56769e-05	5.11167e-05
945	0.000129592	2.38791e-05	5.9803e-05	2.58007e-05	1.56769e-05	5.09503e-05
946	0.00012671	2.36202e-05	5.85286e-05	2.46886e-05	1.4893e-05	4.96881e-05
947	0.000127541	2.39438e-05	5.88017e-05	2.47627e-05	1.4893e-05	4.99884e-05
948	0.000124825	2.38144e-05	5.74818e-05	2.43179e-05	1.4893e-05	4.90664e-05
949	7.89858e-05	1.65018e-05	3.75475e-05	1.77194e-05	1.33254e-05	3.2816e-05
950	8.25333e-05	1.70195e-05	3.87308e-05	1.86833e-05	1.41092e-05	3.42152e-05
951	8.23116e-05	1.69548e-05	3.85488e-05	1.86091e-05	1.41092e-05	3.41067e-05
952	6.17475e-05	1.45604e-05	3.04021e-05	1.73487e-05	1.33254e-05	2.74768e-05
953	6.2967e-05	1.46899e-05	3.08117e-05	1.81643e-05	1.33254e-05	2.79917e-05
954	6.23018e-05	1.46899e-05	3.08117e-05	1.82384e-05	1.33254e-05	2.78734e-05
955	6.1415e-05	1.46251e-05	3.07207e-05	1.82384e-05	1.33254e-05	2.76649e-05
956	5.77567e-05	1.43663e-05	3.03111e-05	1.77936e-05	1.33254e-05	2.67106e-05
957	5.97521e-05	1.47546e-05	3.06297e-05	1.8535e-05	1.33254e-05	2.73994e-05
958	5.88098e-05	1.43663e-05	2.95829e-05	1.76453e-05	1.33254e-05	2.67459e-05
959	5.93641e-05	1.43663e-05	2.95829e-05	1.77194e-05	1.33254e-05	2.68716e-05
960	5.76458e-05	1.3978e-05	2.89457e-05	1.73487e-05	1.25415e-05	2.60919e-05
961	5.57058e-05	1.34603e-05	2.70342e-05	1.63108e-05	1.09738e-05	2.4697e-05
962	5.24909e-05	1.18425e-05	2.38939e-05	1.4828e-05	7.83845e-06	2.21788e-05
963	3.95761e-05	6.21245e-06	1.31985e-05	9.19335e-06	3.13538e-06	1.42632e-05
964	2.49983e-05	3.88278e-06	7.73707e-06	5.93119e-06	2.35153e-06	8.98017e-06
965	2.74372e-05	4.01221e-06	8.32872e-06	6.15361e-06	3.13538e-06	9.81342e-06
966	2.73818e-05	3.94749e-06	8.46526e-06	6.15361e-06	3.13538e-06	9.81671e-06
967	2.0176e-05	2.58852e-06	6.3717e-06	5.18979e-06	1.56769e-06	7.17874e-06
968	2.61623e-05	3.30036e-06	9.87614e-06	6.37603e-06	1.56769e-06	9.4565e-06
969	2.6384e-05	3.42979e-06	1.00582e-05	6.59845e-06	1.56769e-06	9.60763e-06
970	2.03977e-05	2.65323e-06	7.8736e-06	4.81909e-06	7.83845e-07	7.30549e-06
971	2.55526e-05	4.07692e-06	1.16056e-05	6.30189e-06	1.56769e-06	9.82094e-06
972	2.59406e-05	4.33577e-06	1.18332e-05	6.30189e-06	1.56769e-06	9.99583e-06
973	2.53863e-05	4.52991e-06	1.18787e-05	6.22775e-06	1.56769e-06	9.91807e-06
974	3.24812e-05	9.70695e-06	1.90241e-05	9.41577e-06	2.35153e-06	1.45959e-05
975	3.26475e-05	9.9658e-06	1.93882e-05	9.78647e-06	2.35153e-06	1.48279e-05
976	3.29246e-05	1.03541e-05	2.00709e-05	1.0083e-05	2.35153e-06	1.51568e-05
977	3.29246e-05	1.03541e-05	2.02074e-05	1.0083e-05	2.35153e-06	1.51841e-05
978	3.29246e-05	1.04188e-05	2.02074e-05	1.0083e-05	2.35153e-06	1.51971e-05
979	3.29246e-05	1.04188e-05	2.01619e-05	1.0083e-05	2.35153e-06	1.5188e-05
980	3.29246e-05	1.04188e-05	2.01619e-05	1.0083e-05	2.35153e-06	1.5188e-05
981	3.29246e-05	1.04188e-05	2.01619e-05	1.0083e-05	2.35153e-06	1.5188e-05
982	3.27583e-05	1.02247e-05	2.00709e-05	1.00089e-05	2.35153e-06	1.50829e-05
983	3.22041e-05	1.01599e-05	1.98888e-05	1.00089e-05	2.35153e-06	1.49226e-05
984	3.22595e-05	1.02247e-05	1.98888e-05	1.00089e-05	2.35153e-06	1.49467e-05
985	3.19269e-05	1.02247e-05	1.97978e-05	9.93475e-06	2.35153e-06	1.48471e-05
986	3.12063e-05	1.02247e-05	1.96612e-05	9.71233e-06	2.35153e-06	1.46312e-05
987	3.03195e-05	1.01599e-05	1.93882e-05	9.34163e-06	2.35153e-06	1.43122e-05
988	2.72155e-05	9.64224e-06	1.82959e-05	8.52609e-06	2.35153e-06	1.32063e-05
989	2.72709e-05	9.70695e-06	1.82959e-05	8.52609e-06	2.35153e-06	1.32303e-05
990	2.43332e-05	9.18925e-06	1.70671e-05	7.63641e-06	2.35153e-06	1.21155e-05
991	2.31692e-05	8.67154e-06	1.63844e-05	7.11743e-06	2.35153e-06	1.15388e-05
992	2.31692e-05	8.67154e-06	1.63844e-05	7.04329e-06	2.35153e-06	1.1524e-05
993	2.25595e-05	8.54212e-06	1.60658e-05	6.82087e-06	2.35153e-06	1.1268e-05
994	2.22269e-05	8.4774e-06	1.58382e-05	6.67259e-06	2.35153e-06	1.11133e-05
995	1.75709e-05	6.14774e-06	1.16511e-05	5.56049e-06	1.56769e-06	8.49958e-06
996	1.54646e-05	4.59462e-06	9.46653e-06	3.78113e-06	7.83845e-07	6.81815e-06
997	7.26115e-06	2.26496e-06	3.91404e-06	1.4828e-06	7.83845e-07	3.14136e-06
998	9.64459e-06	2.39438e-06	4.23263e-06	1.77936e-06	0	3.61019e-06
999	9.75544e-06	2.32967e-06	4.18712e-06	1.8535e-06	0	3.62515e-06
1000	9.64459e-06	2.26496e-06	3.95956e-06	1.8535e-06	0	3.54452e-06
1001	6.7623e-06	6.4713e-07	1.27434e-06	5.18979e-07	0	1.84055e-06
1002	8.7023e-06	7.76556e-07	1.77497e-06	5.18979e-07	0	2.35456e-06
1003	8.36973e-06	7.11843e-07	1.68395e-06	5.18979e-07	0	2.2569e-06
1004	7.64916e-06	5.82417e-07	1.72946e-06	4.44839e-07	0	2.08118e-06
1005	9.25659e-06	5.82417e-07	2.00253e-06	6.67259e-07	0	2.50176e-06
1006	9.42287e-06	5.17704e-07	1.95702e-06	6.67259e-07	0	2.51297e-06
1007	9.70002e-06	5.17704e-07	2.04805e-06	8.15539e-07	0	2.61626e-06
1008	9.58916e-06	5.82417e-07	2.00253e-06	8.15539e-07	0	2.59793e-06
1009	8.64687e-06	5.17704e-07	1.72946e-06	8.15539e-07	0	2.34191e-06
1010	9.64459e-06	7.11843e-07	1.72946e-06	8.89679e-07	0	2.59511e-06
1011	9.75544e-06	7.11843e-07	1.72946e-06	8.89679e-07	0	2.61728e-06
1012	9.75544e-06	7.11843e-07	1.72946e-06	8.89679e-07	0	2.61728e-06
1013	9.25659e-06	5.82417e-07	1.59293e-06	8.89679e-07	0	2.46432e-06
1014	1.10857e-05	6.4713e-07	1.95702e-06	1.03796e-06	0	2.94556e-06
1015	1.10303e-05	6.4713e-07	1.866e-06	1.03796e-06	0	2.91628e-06
1016	1.73492e-05	1.55311e-06	3.77751e-06	1.77936e-06	0	4.89184e-06
1017	1.75155e-05	1.61783e-06	3.82302e-06	1.77936e-06	0	4.94714e-06
1018	1.76263e-05	1.61783e-06	3.77751e-06	1.77936e-06	0	4.9602e-06
1019	1.79589e-05	1.61783e-06	3.95956e-06	2.00178e-06	0	5.10761e-06
1020	1.79589e-05	1.61783e-06	3.95956e-06	2.00178e-06	0	5.10761e-06
1021	1.79589e-05	1.61783e-06	3.95956e-06	2.00178e-06	0	5.10761e-06
1022	1.7848e-05	1.61783e-06	3.95956e-06	1.92764e-06	0	5.07061e-06
1023	1.7848e-05	1.61783e-06	3.95956e-06	1.92764e-06	0	5.07061e-06
1024	1.77926e-05	1.61783e-06	3.95956e-06	1.8535e-06	0	5.0447e-06
1025	1.76817e-05	1.55311e-06	3.95956e-06	1.8535e-06	0	5.00957e-06
1026	1.55755e-05	1.42369e-06	3.18585e-06	1.77936e-06	0	4.39288e-06
1027	1.57972e-05	1.42369e-06	3.18585e-06	1.77936e-06	1.56769e-06	4.75076e-06
1028	1.5132e-05	1.35897e-06	3.09483e-06	1.63108e-06	1.56769e-06	4.55691e-06
1029	1.25823e-05	1.29426e-06	2.86727e-06	1.26038e-06	1.56769e-06	3.91438e-06
1030	1.54092e-05	1.61783e-06	3.27687e-06	1.4828e-06	1.56769e-06	4.67088e-06
1031	1.54092e-05	1.61783e-06	3.27687e-06	1.4828e-06	1.56769e-06	4.67088e-06
1032	1.54092e-05	1.61783e-06	3.27687e-06	1.4828e-06	1.56769e-06	4.67088e-06
1033	1.46332e-05	1.55311e-06	3.09483e-06	1.33452e-06	1.56769e-06	4.43667e-06
1034	1.52429e-05	2.07082e-06	3.732e-06	1.40866e-06	1.56769e-06	4.80441e-06
1035	1.51875e-05	2.07082e-06	3.732e-06	1.40866e-06	1.56769e-06	4.79333e-06
1036	1.48549e-05	2.0061e-06	3.45892e-06	1.33452e-06	1.56769e-06	4.64443e-06
1037	1.33583e-05	1.74725e-06	3.14034e-06	1.1121e-06	1.56769e-06	4.18514e-06
1038	1.47995e-05	1.68254e-06	3.45892e-06	1.18624e-06	1.56769e-06	4.53898e-06
1039	1.45223e-05	1.61783e-06	3.04931e-06	1.1121e-06	1.56769e-06	4.37385e-06
1040	1.46886e-05	1.68254e-06	3.18585e-06	1.18624e-06	1.56769e-06	4.46218e-06
1041	1.01434e-05	1.42369e-06	2.00253e-06	7.41399e-07	1.56769e-06	3.17574e-06
1042	1.76817e-05	2.84737e-06	5.05185e-06	3.41044e-06	2.35153e-06	6.26858e-06
1043	1.80697e-05	2.91209e-06	5.2339e-06	3.3363e-06	2.35153e-06	6.3807e-06
1044	1.82915e-05	2.9768e-06	5.32492e-06	3.41044e-06	2.35153e-06	6.47104e-06
1045	1.77372e-05	2.91209e-06	5.2339e-06	3.3363e-06	2.35153e-06	6.3142e-06
1046	1.96217e-05	3.75335e-06	6.46273e-06	4.07769e-06	3.13538e-06	7.41017e-06
1047	2.00097e-05	4.01221e-06	6.91785e-06	4.07769e-06	3.91922e-06	7.78733e-06
1048	1.91229e-05	3.81807e-06	7.00887e-06	4.67081e-06	7.0546e-06	8.33505e-06
1049	5.82001e-05	1.52076e-05	2.8263e-05	2.46886e-05	2.19477e-05	2.96614e-05
1050	5.97521e-05	1.54664e-05	3.02201e-05	2.52076e-05	2.19477e-05	3.05188e-05
1051	6.00847e-05	1.55311e-05	3.03111e-05	2.52817e-05	2.19477e-05	3.06313e-05
1052	6.00847e-05	1.55311e-05	3.04021e-05	2.52817e-05	2.19477e-05	3.06495e-05
1053	5.99184e-05	1.55311e-05	3.04021e-05	2.53558e-05	2.19477e-05	3.0631e-05
1054	6.0251e-05	1.55311e-05	3.04476e-05	2.53558e-05	2.19477e-05	3.07066e-05
1055	6.0251e-05	1.54664e-05	3.04476e-05	2.53558e-05	2.19477e-05	3.06937e-05
1056	6.0251e-05	1.54664e-05	3.04476e-05	2.543e-05	2.19477e-05	3.07085e-05
1057	5.96412e-05	1.52076e-05	3.00835e-05	2.53558e-05	2.19477e-05	3.04472e-05
1058	5.91978e-05	1.5337e-05	3.0038e-05	2.53558e-05	2.19477e-05	3.03753e-05
1059	6.31332e-05	1.56605e-05	3.14489e-05	2.64679e-05	2.35153e-05	3.20452e-05
1060	6.32441e-05	1.57253e-05	3.14034e-05	2.65421e-05	2.35153e-05	3.2086e-05
1061	6.23018e-05	1.54017e-05	3.15854e-05	2.66162e-05	2.35153e-05	3.18841e-05
1062	0.000105924	2.7503e-05	5.31582e-05	4.9303e-05	3.91922e-05	5.50161e-05
1063	0.000112576	3.04151e-05	5.8028e-05	5.54566e-05	4.5463e-05	6.03877e-05
1064	0.000112908	3.0674e-05	5.83921e-05	5.63463e-05	4.5463e-05	6.07567e-05
1065	0.000148272	5.37765e-05	9.02506e-05	9.40835e-05	8.70068e-05	9.46779e-05
1066	0.000152318	5.59767e-05	9.39371e-05	9.82354e-05	9.01421e-05	9.81219e-05
1067	0.000152595	5.60415e-05	9.39371e-05	9.83836e-05	9.01421e-05	9.82199e-05
1068	0.000152928	5.63003e-05	9.43012e-05	9.86802e-05	9.0926e-05	9.86271e-05
1069	0.000152983	5.62356e-05	9.43012e-05	9.81612e-05	9.01421e-05	9.83646e-05
1070	0.000153039	5.62356e-05	9.43467e-05	9.81612e-05	9.01421e-05	9.83849e-05
1071	0.000152928	5.61062e-05	9.43467e-05	9.80129e-05	9.01421e-05	9.83072e-05
1072	0.000151376	5.48766e-05	9.25717e-05	9.69008e-05	8.93583e-05	9.70167e-05
1073	0.000151154	5.42942e-05	9.23442e-05	9.58629e-05	8.85744e-05	9.64459e-05
1074	0.000151487	5.42942e-05	9.20256e-05	9.57146e-05	8.85744e-05	9.64192e-05
1075	0.000143505	5.15763e-05	8.66551e-05	9.17111e-05	8.54391e-05	9.17773e-05
1076	0.000155921	5.52002e-05	9.71684e-05	9.71974e-05	8.85744e-05	9.88123e-05
1077	0.000156309	5.49413e-05	9.7214e-05	9.6975e-05	8.85744e-05	9.88027e-05
1078	0.000156808	5.50061e-05	9.75325e-05	9.70491e-05	8.77906e-05	9.88373e-05
1079	0.000157307	5.51355e-05	9.80787e-05	9.69008e-05	8.70068e-05	9.88858e-05
1080	0.000153759	5.35177e-05	9.57121e-05	9.4306e-05	8.46552e-05	9.639e-05
1081	0.000155422	5.39706e-05	9.65768e-05	9.34163e-05	8.46552e-05	9.68082e-05
1082	0.000155145	5.39059e-05	9.66678e-05	9.30456e-05	8.46552e-05	9.66839e-05
1083	0.00015448	5.35177e-05	9.60761e-05	9.20076e-05	8.46552e-05	9.61473e-05
1084	0.000153925	5.31941e-05	9.52569e-05	9.06731e-05	8.46552e-05	9.55409e-05
1085	0.000121001	3.45567e-05	6.89054e-05	5.4048e-05	5.40853e-05	6.65193e-05
1086	0.000132585	3.71453e-05	7.5095e-05	5.75326e-05	5.48691e-05	7.14454e-05
1087	0.000132474	3.66923e-05	7.47765e-05	5.70877e-05	5.48691e-05	7.11799e-05
1088	0.000132696	3.66923e-05	7.46399e-05	5.71619e-05	5.48691e-05	7.12118e-05
1089	0.00012998	3.44273e-05	7.25919e-05	5.31583e-05	5.09499e-05	6.82215e-05
1090	0.000121167	2.53028e-05	6.22606e-05	4.3446e-05	3.37053e-05	5.71763e-05
1091	0.000121666	2.51086e-05	6.25337e-05	4.24822e-05	3.29215e-05	5.69424e-05
1092	9.1291e-05	1.41074e-05	4.32821e-05	2.29092e-05	9.40614e-06	3.61992e-05
1093	9.38962e-05	1.52076e-05	4.53301e-05	2.37989e-05	1.019e-05	3.76846e-05
1094	9.20116e-05	1.50134e-05	4.42833e-05	2.29834e-05	1.019e-05	3.68963e-05
1095	8.47504e-05	1.43663e-05	4.08244e-05	2.00178e-05	7.0546e-06	3.34027e-05
1096	5.99738e-05	1.17778e-05	3.14489e-05	1.49021e-05	4.70307e-06	2.45611e-05
1097	6.79001e-05	1.28779e-05	3.51354e-05	1.57918e-05	4.70307e-06	2.72817e-05
1098	6.79001e-05	1.28132e-05	3.51809e-05	1.57918e-05	4.70307e-06	2.72778e-05
1099	5.74795e-05	1.01599e-05	2.66246e-05	1.18624e-05	3.91922e-06	2.20091e-05
1100	5.78121e-05	9.9658e-06	2.62605e-05	1.14175e-05	3.91922e-06	2.1875e-05
1101	5.04401e-05	8.54212e-06	2.23465e-05	9.26749e-06	3.91922e-06	1.89031e-05
1102	5.26572e-05	8.86568e-06	2.32112e-05	9.78647e-06	4.70307e-06	1.98447e-05
1103	5.24355e-05	8.80097e-06	2.30747e-05	9.71233e-06	4.70307e-06	1.97453e-05
1104	5.29898e-05	8.93039e-06	2.34388e-05	9.71233e-06	4.70307e-06	1.99549e-05
1105	4.81675e-05	7.83027e-06	2.01164e-05	7.71055e-06	3.13538e-06	1.7392e-05
1106	5.48189e-05	1.05482e-05	2.65791e-05	8.82265e-06	3.13538e-06	2.07808e-05
1107	5.48189e-05	1.05482e-05	2.65791e-05	8.74851e-06	3.13538e-06	2.0766e-05
1108	5.47635e-05	1.05482e-05	2.64881e-05	8.67437e-06	3.13538e-06	2.07219e-05
1109	5.46527e-05	1.05482e-05	2.64881e-05	8.52609e-06	3.13538e-06	2.06701e-05
1110	5.11052e-05	8.54212e-06	2.29381e-05	6.22775e-06	3.13538e-06	1.83897e-05
1111	4.88327e-05	7.83027e-06	2.21644e-05	5.93119e-06	3.13538e-06	1.75788e-05
1112	2.90446e-05	5.37118e-06	1.44274e-05	4.07769e-06	7.83845e-07	1.07409e-05
1113	3.79686e-05	9.18925e-06	1.93882e-05	6.52431e-06	7.83845e-07	1.47708e-05
1114	3.85229e-05	9.64224e-06	2.00709e-05	6.74673e-06	7.83845e-07	1.51533e-05
1115	3.84675e-05	1.09365e-05	2.2392e-05	7.78469e-06	7.83845e-07	1.60729e-05
1116	4.63384e-05	1.32662e-05	2.68067e-05	8.82265e-06	2.35153e-06	1.95171e-05
1117	4.24584e-05	1.28132e-05	2.48041e-05	7.93297e-06	2.35153e-06	1.8072e-05
1118	5.99738e-05	1.87668e-05	3.40886e-05	1.5347e-05	7.83845e-06	2.72029e-05
1119	5.94195e-05	1.87668e-05	3.41796e-05	1.52728e-05	7.83845e-06	2.70954e-05
1120	6.24127e-05	1.94786e-05	3.52719e-05	1.63108e-05	8.62229e-06	2.84193e-05
1121	8.63579e-05	3.13858e-05	5.70722e-05	2.77283e-05	2.5083e-05	4.55254e-05
1122	8.69676e-05	3.15799e-05	5.75274e-05	2.79507e-05	2.5083e-05	4.58217e-05
1123	8.7411e-05	3.15152e-05	5.8028e-05	2.81732e-05	2.5083e-05	4.60421e-05
1124	8.77436e-05	3.15152e-05	5.8028e-05	2.81732e-05	2.5083e-05	4.61086e-05
1125	8.69676e-05	3.11917e-05	5.69812e-05	2.83956e-05	2.5083e-05	4.57238e-05
1126	0.000101933	4.847e-05	7.36842e-05	4.52995e-05	3.21376e-05	6.03049e-05
1127	0.000102709	5.0282e-05	7.50495e-05	4.64857e-05	3.29215e-05	6.14895e-05
1128	0.000106146	5.38412e-05	7.94642e-05	5.086e-05	3.37053e-05	6.48033e-05
1129	0.00010537	5.48766e-05	7.96918e-05	5.24169e-05	3.37053e-05	6.52121e-05
1130	0.000114959	6.45836e-05	9.06602e-05	6.12396e-05	3.68407e-05	7.36566e-05
1131	0.000116234	6.58131e-05	9.32089e-05	6.30189e-05	3.84084e-05	7.53367e-05
1132	0.000116068	6.58778e-05	9.30268e-05	6.30931e-05	3.84084e-05	7.52948e-05
1133	0.000116234	6.59425e-05	9.32999e-05	6.30931e-05	3.84084e-05	7.53956e-05
1134	0.000116289	6.58778e-05	9.31634e-05	6.30189e-05	3.84084e-05	7.53515e-05
1135	0.000116178	6.56837e-05	9.31634e-05	6.29448e-05	3.84084e-05	7.52757e-05
1136	0.000116178	6.54248e-05	9.30723e-05	6.27965e-05	3.84084e-05	7.5176e-05
1137	0.000112409	6.18656e-05	8.74744e-05	5.93119e-05	3.5273e-05	7.12668e-05
1138	0.000107753	6.05067e-05	8.48346e-05	5.84222e-05	3.44892e-05	6.92011e-05
1139	0.0001215	7.84969e-05	0.000100991	7.58451e-05	5.17337e-05	8.57133e-05
1140	0.000123052	8.26385e-05	0.00010577	8.14056e-05	5.48691e-05	8.9547e-05
1141	0.000123107	8.28326e-05	0.000105952	8.15539e-05	5.48691e-05	8.96629e-05
1142	0.000122719	8.32209e-05	0.000105998	8.15539e-05	5.48691e-05	8.96722e-05
1143	0.000122664	8.36739e-05	0.000105907	8.15539e-05	5.48691e-05	8.97336e-05
1144	0.000122497	8.38033e-05	0.000106089	8.12573e-05	5.40853e-05	8.95464e-05
1145	0.000120003	8.20561e-05	0.000103586	7.86624e-05	5.33014e-05	8.75218e-05
1146	0.000119061	8.14737e-05	0.000103131	7.80693e-05	5.33014e-05	8.70073e-05
1147	0.000118008	7.90793e-05	0.000100809	7.58451e-05	5.33014e-05	8.54086e-05
1148	9.47276e-05	5.7271e-05	7.63239e-05	5.68653e-05	4.23276e-05	6.55031e-05
1149	9.50602e-05	5.83064e-05	7.77348e-05	5.6717e-05	4.23276e-05	6.60292e-05
1150	9.45613e-05	5.79181e-05	7.72796e-05	5.59015e-05	4.23276e-05	6.55976e-05
1151	6.81773e-05	4.44578e-05	5.89837e-05	4.10735e-05	3.44892e-05	4.94363e-05
1152	6.92304e-05	4.45225e-05	5.92113e-05	4.12218e-05	3.44892e-05	4.9735e-05
1153	6.35767e-05	4.34871e-05	5.69357e-05	4.00355e-05	3.05699e-05	4.6921e-05
1154	6.7235e-05	4.3293e-05	5.71633e-05	3.99614e-05	3.05699e-05	4.76445e-05
1155	6.7235e-05	4.32283e-05	5.70267e-05	3.99614e-05	3.05699e-05	4.76043e-05
1156	6.31332e-05	4.17399e-05	5.45691e-05	3.91459e-05	3.05699e-05	4.58316e-05
1157	6.65698e-05	4.18693e-05	5.58434e-05	3.96648e-05	3.13538e-05	4.70602e-05
1158	6.65698e-05	4.18693e-05	5.57979e-05	3.96648e-05	3.13538e-05	4.70511e-05
1159	6.61264e-05	4.15457e-05	5.54338e-05	3.8701e-05	2.97861e-05	4.63186e-05
1160	6.58492e-05	4.13516e-05	5.48877e-05	3.78855e-05	2.82184e-05	4.56385e-05
1161	6.59047e-05	4.12222e-05	5.48877e-05	3.78113e-05	2.82184e-05	4.56089e-05
1162	6.23572e-05	3.92161e-05	5.22479e-05	3.57354e-05	2.82184e-05	4.3555e-05
1163	3.37561e-05	7.18314e-06	1.66119e-05	6.96915e-06	1.17577e-05	1.52556e-05
1164	3.44212e-05	6.989e-06	1.62478e-05	7.11743e-06	1.09738e-05	1.51498e-05
1165	3.00423e-05	5.9536e-06	1.31985e-05	4.96737e-06	9.40614e-06	1.27136e-05
1166	2.0564e-05	4.72405e-06	9.60306e-06	3.85527e-06	4.70307e-06	8.68989e-06
1167	2.40006e-05	5.37118e-06	1.08774e-05	4.74495e-06	4.70307e-06	9.93944e-06
1168	2.4056e-05	5.24175e-06	1.06954e-05	4.67081e-06	4.70307e-06	9.87341e-06
1169	2.16726e-05	2.58852e-06	6.78131e-06	3.41044e-06	1.56769e-06	7.20411e-06
1170	2.43332e-05	2.9768e-06	7.8736e-06	3.92941e-06	1.56769e-06	8.13614e-06
1171	2.42778e-05	3.04151e-06	7.82809e-06	3.92941e-06	1.56769e-06	8.1289e-06
1172	2.46658e-05	3.04151e-06	8.2377e-06	3.92941e-06	1.56769e-06	8.28842e-06
1173	2.51092e-05	3.04151e-06	8.73833e-06	4.07769e-06	1.56769e-06	8.50688e-06
1174	2.50538e-05	3.23565e-06	9.01141e-06	4.37425e-06	1.56769e-06	8.64856e-06
1175	2.43332e-05	3.10622e-06	8.69282e-06	4.22597e-06	1.56769e-06	8.38518e-06
1176	1.85686e-05	2.52381e-06	6.69029e-06	3.26216e-06	1.56769e-06	6.52251e-06
1177	2.134e-05	2.78266e-06	7.28194e-06	3.92941e-06	7.83845e-07	7.22357e-06
1178	2.15063e-05	2.78266e-06	7.32746e-06	3.92941e-06	7.83845e-07	7.26594e-06
1179	2.16726e-05	2.78266e-06	7.32746e-06	4.00355e-06	7.83845e-07	7.31402e-06
1180	2.15617e-05	2.78266e-06	7.32746e-06	4.00355e-06	7.83845e-07	7.29184e-06
1181	2.15617e-05	2.78266e-06	7.32746e-06	4.00355e-06	7.83845e-07	7.29184e-06
1182	1.57972e-05	2.39438e-06	6.09863e-06	3.78113e-06	7.83845e-07	5.77104e-06
1183	1.65177e-05	2.45909e-06	6.41721e-06	3.92941e-06	0	5.86468e-06
1184	1.65177e-05	2.45909e-06	6.32619e-06	3.92941e-06	0	5.84648e-06
1185	1.65177e-05	2.45909e-06	6.32619e-06	3.92941e-06	0	5.84648e-06
1186	1.41897e-05	1.68254e-06	5.32492e-06	3.41044e-06	0	4.92152e-06
1187	1.46886e-05	1.68254e-06	5.46146e-06	3.55872e-06	0	5.07826e-06
1188	1.46886e-05	1.68254e-06	5.46146e-06	3.55872e-06	0	5.07826e-06
1189	1.46886e-05	1.68254e-06	5.46146e-06	3.48458e-06	0	5.06344e-06
1190	1.4744e-05	1.68254e-06	5.50697e-06	3.48458e-06	0	5.08362e-06
1191	1.37463e-05	1.16483e-06	4.96082e-06	3.3363e-06	0	4.64165e-06
1192	1.36909e-05	1.16483e-06	4.96082e-06	3.3363e-06	0	4.63057e-06
1193	1.34692e-05	1.16483e-06	4.8698e-06	3.26216e-06	0	4.5532e-06
1194	1.34692e-05	1.16483e-06	4.91531e-06	3.26216e-06	0	4.5623e-06
1195	1.11966e-05	8.41269e-07	3.09483e-06	2.37248e-06	0	3.50104e-06
1196	1.0864e-05	8.41269e-07	2.82175e-06	2.29834e-06	0	3.36507e-06
1197	1.07532e-05	8.41269e-07	2.82175e-06	2.2242e-06	0	3.32808e-06
1198	2.66058e-06	2.58852e-07	7.73707e-07	6.67259e-07	0	8.7208e-07
1199	3.15943e-06	3.23565e-07	8.19219e-07	8.15539e-07	0	1.02355e-06
1200	2.38343e-06	2.58852e-07	7.28194e-07	6.67259e-07	0	8.07547e-07
1201	3.54743e-06	6.4713e-07	1.09229e-06	8.15539e-07	0	1.22048e-06
1202	4.10172e-06	8.41269e-07	1.41088e-06	9.63819e-07	0	1.46354e-06
1203	1.06423e-05	2.45909e-06	5.18839e-06	2.29834e-06	0	4.11762e-06
1204	1.11412e-05	2.52381e-06	5.37043e-06	2.37248e-06	0	4.28158e-06
1205	1.11966e-05	2.52381e-06	5.37043e-06	2.37248e-06	0	4.29266e-06
1206	1.17509e-05	2.58852e-06	5.68902e-06	2.44662e-06	0	4.49501e-06
1207	1.19172e-05	2.91209e-06	5.82556e-06	2.52076e-06	0	4.63512e-06
1208	1.49103e-05	4.01221e-06	7.23643e-06	3.18802e-06	0	5.86939e-06
1209	1.51875e-05	4.07692e-06	7.46399e-06	3.18802e-06	0	5.98329e-06
1210	1.552e-05	4.14163e-06	7.69155e-06	3.41044e-06	0	6.15272e-06
1211	1.57972e-05	4.14163e-06	7.73707e-06	3.3363e-06	0	6.20244e-06
1212	1.746e-05	4.27106e-06	8.37424e-06	3.3363e-06	7.83845e-07	6.84509e-06
1213	1.746e-05	4.27106e-06	8.37424e-06	3.3363e-06	7.83845e-07	6.84509e-06
1214	1.70166e-05	4.27106e-06	8.14667e-06	3.3363e-06	7.83845e-07	6.7109e-06
1215	1.69612e-05	4.27106e-06	8.10116e-06	3.26216e-06	7.83845e-07	6.67589e-06
1216	1.69057e-05	4.27106e-06	8.05565e-06	3.26216e-06	7.83845e-07	6.65568e-06
1217	1.76263e-05	4.33577e-06	8.46526e-06	3.41044e-06	7.83845e-07	6.92432e-06
1218	1.76263e-05	4.33577e-06	8.51077e-06	3.41044e-06	7.83845e-07	6.93343e-06
1219	1.74046e-05	4.27106e-06	8.46526e-06	3.26216e-06	7.83845e-07	6.83739e-06
1220	2.79915e-05	8.80097e-06	2.03439e-05	6.15361e-06	1.56769e-06	1.29715e-05
1221	2.81578e-05	8.80097e-06	2.0435e-05	6.22775e-06	1.56769e-06	1.30378e-05
1222	2.80469e-05	8.73626e-06	2.02984e-05	6.15361e-06	1.56769e-06	1.29606e-05
1223	2.81578e-05	8.73626e-06	2.04805e-05	6.22775e-06	1.56769e-06	1.3034e-05
1224	2.79915e-05	8.60683e-06	2.02074e-05	6.22775e-06	1.56769e-06	1.29202e-05
1225	2.79915e-05	8.60683e-06	2.02074e-05	6.22775e-06	1.56769e-06	1.29202e-05
1226	2.79915e-05	8.60683e-06	2.02074e-05	6.22775e-06	1.56769e-06	1.29202e-05
1227	2.7936e-05	8.60683e-06	2.02074e-05	6.22775e-06	1.56769e-06	1.29091e-05
1228	2.21715e-05	5.9536e-06	1.63389e-05	4.59667e-06	1.56769e-06	1.01257e-05
1229	2.04532e-05	5.69474e-06	1.58382e-05	4.15183e-06	1.56769e-06	9.54113e-06
1230	1.62406e-05	5.04761e-06	1.45639e-05	3.63286e-06	1.56769e-06	8.21053e-06
1231	1.66286e-05	5.17704e-06	1.4928e-05	3.85527e-06	1.56769e-06	8.43132e-06
1232	1.60743e-05	5.17704e-06	1.47459e-05	3.70699e-06	1.56769e-06	8.25438e-06
1233	4.61166e-05	1.37839e-05	3.3861e-05	1.52728e-05	7.83845e-06	2.33746e-05
1234	4.84446e-05	1.41074e-05	3.56815e-05	1.60884e-05	7.83845e-06	2.44321e-05
1235	5.15487e-05	1.4431e-05	3.7593e-05	1.71263e-05	8.62229e-06	2.58643e-05
1236	5.16595e-05	1.45604e-05	3.78206e-05	1.72005e-05	8.62229e-06	2.59727e-05
1237	5.17149e-05	1.45604e-05	3.77751e-05	1.72746e-05	8.62229e-06	2.59895e-05
1238	5.17704e-05	1.45604e-05	3.77751e-05	1.72746e-05	8.62229e-06	2.60006e-05
1239	5.08835e-05	1.36544e-05	3.64097e-05	1.69039e-05	8.62229e-06	2.52948e-05
1240	5.17149e-05	1.37192e-05	3.65463e-05	1.6978e-05	8.62229e-06	2.55161e-05
1241	5.17149e-05	1.3525e-05	3.63642e-05	1.69039e-05	8.62229e-06	2.54261e-05
1242	5.16041e-05	1.34603e-05	3.63642e-05	1.69039e-05	8.62229e-06	2.5391e-05
1243	4.51744e-05	1.13895e-05	2.95374e-05	1.5347e-05	8.62229e-06	2.20141e-05
1244	4.72806e-05	1.17778e-05	3.09027e-05	1.57918e-05	9.40614e-06	2.30318e-05
1245	4.73361e-05	1.17778e-05	3.09938e-05	1.58659e-05	9.40614e-06	2.30759e-05
1246	4.73361e-05	1.17778e-05	3.09938e-05	1.58659e-05	9.40614e-06	2.30759e-05
1247	4.73361e-05	1.17778e-05	3.09938e-05	1.58659e-05	9.40614e-06	2.30759e-05
1248	4.73915e-05	1.17778e-05	3.09938e-05	1.58659e-05	9.40614e-06	2.3087e-05
1249	4.71698e-05	1.13895e-05	3.0038e-05	1.57177e-05	9.40614e-06	2.27442e-05
1250	4.71144e-05	1.13248e-05	2.9947e-05	1.57177e-05	9.40614e-06	2.2702e-05
1251	4.69481e-05	1.11306e-05	2.9856e-05	1.56435e-05	9.40614e-06	2.25969e-05
1252	4.65601e-05	1.08718e-05	2.89002e-05	1.49763e-05	9.40614e-06	2.21429e-05
1253	4.64492e-05	1.08718e-05	2.87637e-05	1.49021e-05	9.40614e-06	2.20786e-05
1254	4.40104e-05	9.31867e-06	2.49862e-05	1.37159e-05	8.62229e-06	2.01307e-05
1255	1.21389e-05	1.03541e-06	3.95956e-06	1.63108e-06	1.56769e-06	4.06653e-06
1256	1.29149e-05	1.16483e-06	4.18712e-06	1.63108e-06	1.56769e-06	4.29312e-06
1257	1.26932e-05	1.10012e-06	4.09609e-06	1.55694e-06	1.56769e-06	4.20281e-06
1258	1.25269e-05	1.10012e-06	4.05058e-06	1.55694e-06	2.35153e-06	4.31721e-06
1259	7.31658e-06	9.05982e-07	3.0038e-06	1.03796e-06	1.56769e-06	2.7664e-06
1260	9.92173e-06	1.22955e-06	3.77751e-06	1.26038e-06	1.56769e-06	3.55137e-06
1261	9.58916e-06	1.22955e-06	3.77751e-06	1.26038e-06	1.56769e-06	3.48486e-06
1262	9.25659e-06	1.22955e-06	3.68648e-06	1.26038e-06	1.56769e-06	3.40014e-06
1263	8.59144e-06	9.70695e-07	3.09483e-06	1.03796e-06	7.83845e-07	2.89575e-06
1264	7.26115e-06	9.05982e-07	2.36663e-06	7.41399e-07	7.83845e-07	2.4118e-06
1265	9.20116e-06	1.22955e-06	2.77624e-06	8.15539e-07	7.83845e-07	2.96127e-06
1266	9.31202e-06	1.22955e-06	2.73073e-06	8.15539e-07	7.83845e-07	2.97434e-06
1267	8.75773e-06	1.22955e-06	2.50317e-06	7.41399e-07	7.83845e-07	2.80314e-06
1268	1.2416e-05	1.74725e-06	4.05058e-06	1.40866e-06	7.83845e-07	4.08127e-06
1269	1.26932e-05	1.74725e-06	4.05058e-06	1.40866e-06	7.83845e-07	4.13671e-06
1270	1.26932e-05	1.74725e-06	4.05058e-06	1.40866e-06	7.83845e-07	4.13671e-06
1271	1.26932e-05	1.74725e-06	4.05058e-06	1.33452e-06	7.83845e-07	4.12188e-06
1272	1.26932e-05	1.74725e-06	4.05058e-06	1.33452e-06	7.83845e-07	4.12188e-06
1273	1.22497e-05	1.74725e-06	3.95956e-06	1.33452e-06	7.83845e-07	4.01498e-06
1274	1.24714e-05	1.81196e-06	4.00507e-06	1.33452e-06	7.83845e-07	4.08136e-06
1275	1.15846e-05	1.61783e-06	3.732e-06	1.18624e-06	7.83845e-07	3.7809e-06
1276	1.2804e-05	1.61783e-06	3.91404e-06	1.18624e-06	7.83845e-07	4.06119e-06
1277	1.26932e-05	1.55311e-06	3.91404e-06	1.18624e-06	7.83845e-07	4.02609e-06
1278	1.67395e-05	2.26496e-06	6.7358e-06	1.63108e-06	7.83845e-07	5.63104e-06
1279	1.67395e-05	2.26496e-06	6.7358e-06	1.63108e-06	7.83845e-07	5.63104e-06
1280	1.66286e-05	2.26496e-06	6.69029e-06	1.63108e-06	7.83845e-07	5.59976e-06
1281	1.65177e-05	2.26496e-06	6.50824e-06	1.63108e-06	7.83845e-07	5.54117e-06
1282	1.65732e-05	2.26496e-06	6.41721e-06	1.55694e-06	7.83845e-07	5.51923e-06
1283	1.49657e-05	1.94139e-06	5.64351e-06	1.40866e-06	7.83845e-07	4.94862e-06
1284	1.53537e-05	2.0061e-06	5.96209e-06	1.40866e-06	0	4.94611e-06
1285	1.49103e-05	1.81196e-06	5.82556e-06	1.33452e-06	0	4.77647e-06
1286	1.3968e-05	1.94139e-06	5.73453e-06	1.33452e-06	0	4.59569e-06
1287	1.9788e-05	1.02247e-05	1.50645e-05	6.07947e-06	3.13538e-06	1.08584e-05
1288	1.9788e-05	1.02894e-05	1.53376e-05	6.07947e-06	3.91922e-06	1.10827e-05
1289	1.68503e-05	9.9658e-06	1.47459e-05	5.70877e-06	3.91922e-06	1.0238e-05
1290	2.16172e-05	1.05482e-05	1.57927e-05	6.30189e-06	5.48691e-06	1.19494e-05
1291	2.15063e-05	1.05482e-05	1.55652e-05	6.30189e-06	5.48691e-06	1.18817e-05
1292	2.12292e-05	1.05482e-05	1.54286e-05	6.15361e-06	5.48691e-06	1.17693e-05
1293	2.20606e-05	1.05482e-05	1.57017e-05	6.37603e-06	5.48691e-06	1.20347e-05
1294	2.18389e-05	1.04835e-05	1.57927e-05	6.30189e-06	5.48691e-06	1.19808e-05
1295	2.21715e-05	1.04835e-05	1.58837e-05	6.37603e-06	5.48691e-06	1.20803e-05
1296	2.22823e-05	1.05482e-05	1.58837e-05	6.30189e-06	5.48691e-06	1.21006e-05
1297	2.23932e-05	1.04835e-05	1.59293e-05	6.30189e-06	5.48691e-06	1.2119e-05
1298	1.81252e-05	9.70695e-06	1.32895e-05	5.93119e-06	5.48691e-06	1.0508e-05
1299	2.02869e-05	1.06776e-05	1.46549e-05	7.33985e-06	7.0546e-06	1.20028e-05
1300	2.0176e-05	1.08071e-05	1.49735e-05	7.85883e-06	7.0546e-06	1.2174e-05
1301	2.91e-05	1.21013e-05	1.85234e-05	1.12693e-05	1.33254e-05	1.68639e-05
1302	2.93218e-05	1.22308e-05	1.8569e-05	1.13434e-05	1.33254e-05	1.69581e-05
1303	2.92663e-05	1.22308e-05	1.86145e-05	1.14175e-05	1.33254e-05	1.69709e-05
1304	2.93218e-05	1.22955e-05	1.86145e-05	1.14175e-05	1.33254e-05	1.69949e-05
1305	2.80469e-05	1.2166e-05	1.81593e-05	1.13434e-05	1.33254e-05	1.66082e-05
1306	5.33224e-05	3.04151e-05	3.98231e-05	4.37425e-05	5.40853e-05	4.42777e-05
1307	5.36549e-05	3.09975e-05	4.03238e-05	4.50771e-05	5.33014e-05	4.46709e-05
1308	5.37104e-05	3.1127e-05	4.03693e-05	4.52253e-05	5.33014e-05	4.47467e-05
1309	5.39321e-05	3.09975e-05	4.01872e-05	4.50029e-05	5.33014e-05	4.46842e-05
1310	5.38767e-05	3.07387e-05	4.00962e-05	4.50029e-05	5.33014e-05	4.46032e-05
1311	5.06064e-05	2.37497e-05	3.39976e-05	4.15925e-05	5.09499e-05	4.01792e-05
1312	4.79458e-05	2.31673e-05	3.27232e-05	4.06287e-05	5.01661e-05	3.89262e-05
1313	5.91424e-05	2.91209e-05	4.51936e-05	4.68564e-05	5.17337e-05	4.64094e-05
1314	5.94195e-05	2.92503e-05	4.52391e-05	4.68564e-05	5.17337e-05	4.64998e-05
1315	5.94195e-05	2.9315e-05	4.52391e-05	4.68564e-05	5.17337e-05	4.65127e-05
1316	5.94195e-05	2.9315e-05	4.52391e-05	4.68564e-05	5.17337e-05	4.65127e-05
1317	5.94195e-05	2.9315e-05	4.52391e-05	4.68564e-05	5.17337e-05	4.65127e-05
1318	5.93087e-05	2.9315e-05	4.52391e-05	4.68564e-05	5.17337e-05	4.64906e-05
1319	5.93087e-05	2.9315e-05	4.51936e-05	4.68564e-05	5.17337e-05	4.64815e-05
1320	5.85327e-05	2.91209e-05	4.46929e-05	4.67081e-05	5.17337e-05	4.61577e-05
1321	5.74795e-05	2.90561e-05	4.41468e-05	4.61892e-05	5.17337e-05	4.57211e-05
1322	5.66481e-05	2.86031e-05	4.28724e-05	4.51512e-05	5.25176e-05	4.51585e-05
1323	5.37658e-05	2.76325e-05	4.09609e-05	4.41874e-05	5.09499e-05	4.34993e-05
1324	5.27127e-05	2.74383e-05	4.04603e-05	4.38167e-05	4.93822e-05	4.2762e-05
1325	4.61166e-05	1.95433e-05	3.30418e-05	3.2325e-05	3.60569e-05	3.34167e-05
1326	5.50961e-05	1.99963e-05	3.53629e-05	3.30664e-05	3.99761e-05	3.66996e-05
1327	5.30452e-05	1.92845e-05	3.3861e-05	2.98042e-05	3.68407e-05	3.45671e-05
1328	5.30452e-05	1.92845e-05	3.38155e-05	2.98042e-05	3.68407e-05	3.4558e-05
1329	5.24355e-05	1.92198e-05	3.30873e-05	2.89887e-05	3.68407e-05	3.41144e-05
1330	5.24909e-05	1.90256e-05	3.28143e-05	2.88404e-05	3.68407e-05	3.40024e-05
1331	4.81675e-05	1.43016e-05	2.73073e-05	2.04626e-05	2.82184e-05	2.76915e-05
1332	2.68829e-05	4.01221e-06	9.78511e-06	5.48635e-06	8.62229e-06	1.09578e-05
1333	2.78806e-05	3.94749e-06	9.69409e-06	5.70877e-06	8.62229e-06	1.11706e-05
1334	2.66612e-05	3.62393e-06	8.46526e-06	5.33807e-06	8.62229e-06	1.05422e-05
1335	2.68829e-05	3.62393e-06	8.41975e-06	5.18979e-06	8.62229e-06	1.05477e-05
1336	2.38343e-05	3.10622e-06	7.05438e-06	4.37425e-06	8.62229e-06	9.39829e-06
1337	2.47212e-05	3.17094e-06	7.5095e-06	4.52253e-06	8.62229e-06	9.70929e-06
1338	2.47766e-05	3.17094e-06	7.41848e-06	4.52253e-06	8.62229e-06	9.70217e-06
1339	2.47212e-05	3.17094e-06	7.41848e-06	4.44839e-06	8.62229e-06	9.67626e-06
1340	2.328e-05	2.78266e-06	6.82682e-06	4.00355e-06	8.62229e-06	9.10306e-06
1341	2.03977e-05	2.39438e-06	6.05312e-06	3.3363e-06	8.62229e-06	8.16076e-06
1342	2.06195e-05	2.39438e-06	6.05312e-06	3.41044e-06	8.62229e-06	8.21995e-06
1343	2.0564e-05	2.39438e-06	6.05312e-06	3.41044e-06	8.62229e-06	8.20885e-06
1344	2.03423e-05	2.39438e-06	5.87107e-06	3.41044e-06	8.62229e-06	8.1281e-06
1345	1.61852e-05	1.74725e-06	4.00507e-06	2.66904e-06	7.0546e-06	6.33223e-06
1346	1.49103e-05	1.4884e-06	3.77751e-06	2.29834e-06	7.0546e-06	5.90583e-06
1347	7.5383e-06	8.41269e-07	1.91151e-06	8.15539e-07	5.48691e-06	3.31871e-06
1348	8.36973e-06	1.03541e-06	2.32112e-06	8.15539e-07	4.70307e-06	3.44897e-06
1349	8.92401e-06	1.22955e-06	2.95829e-06	8.89679e-07	2.35153e-06	3.27061e-06
1350	1.73492e-05	2.20024e-06	6.78131e-06	1.63108e-06	3.13538e-06	6.21944e-06
1351	1.79589e-05	2.32967e-06	7.23643e-06	1.63108e-06	3.13538e-06	6.45829e-06
1352	1.84023e-05	2.32967e-06	7.55502e-06	1.8535e-06	3.13538e-06	6.65517e-06
1353	1.81252e-05	2.39438e-06	7.55502e-06	1.8535e-06	3.13538e-06	6.6127e-06
1354	1.76817e-05	2.39438e-06	7.28194e-06	1.77936e-06	3.13538e-06	6.45455e-06
1355	1.69057e-05	2.26496e-06	7.41848e-06	1.8535e-06	1.56769e-06	6.00207e-06
1356	1.79589e-05	2.52381e-06	8.69282e-06	2.00178e-06	1.56769e-06	6.549e-06
1357	1.71829e-05	2.52381e-06	8.82936e-06	1.92764e-06	1.56769e-06	6.40628e-06
1358	2.95989e-05	4.07692e-06	1.46094e-05	2.81732e-06	1.56769e-06	1.0534e-05
1359	3.03195e-05	4.27106e-06	1.48825e-05	2.81732e-06	1.56769e-06	1.07716e-05
1360	3.03195e-05	4.27106e-06	1.48825e-05	2.74318e-06	1.56769e-06	1.07568e-05
1361	3.04303e-05	4.27106e-06	1.4928e-05	2.74318e-06	1.56769e-06	1.0788e-05
1362	3.04303e-05	4.20635e-06	1.4928e-05	2.74318e-06	1.56769e-06	1.07751e-05
1363	3.02086e-05	4.14163e-06	1.48825e-05	2.74318e-06	1.56769e-06	1.07087e-05
1364	3.0264e-05	4.14163e-06	1.4928e-05	2.74318e-06	1.56769e-06	1.07289e-05
1365	3.09846e-05	4.14163e-06	1.52011e-05	2.66904e-06	1.56769e-06	1.09128e-05
1366	3.09846e-05	4.14163e-06	1.52011e-05	2.66904e-06	1.56769e-06	1.09128e-05
1367	3.08738e-05	4.14163e-06	1.51555e-05	2.66904e-06	1.56769e-06	1.08815e-05
1368	2.82132e-05	3.55922e-06	1.40177e-05	2.37248e-06	7.83845e-07	9.78929e-06
1369	4.47309e-05	4.27106e-06	1.99343e-05	3.70699e-06	7.83845e-07	1.46854e-05
1370	4.55624e-05	4.33577e-06	2.01619e-05	3.70699e-06	7.83845e-07	1.49102e-05
1371	4.56732e-05	4.33577e-06	2.01164e-05	3.70699e-06	7.83845e-07	1.49232e-05
1372	4.47864e-05	3.94749e-06	1.95247e-05	3.3363e-06	7.83845e-07	1.44757e-05
1373	4.47864e-05	3.94749e-06	1.92516e-05	3.3363e-06	0	1.42644e-05
1374	4.35115e-05	3.75335e-06	1.84779e-05	2.9656e-06	0	1.37417e-05
1375	3.94652e-05	3.10622e-06	1.59293e-05	2.44662e-06	0	1.21895e-05
1376	4.30681e-05	3.42979e-06	1.66574e-05	2.81732e-06	0	1.31945e-05
1377	4.05184e-05	3.10622e-06	1.54286e-05	2.81732e-06	0	1.23741e-05
1378	7.84316e-05	8.41269e-06	3.52719e-05	1.26038e-05	3.13538e-06	2.75711e-05
1379	7.8875e-05	8.4774e-06	3.60911e-05	1.29745e-05	3.91922e-06	2.80674e-05
1380	7.88196e-05	8.54212e-06	3.60001e-05	1.30486e-05	3.91922e-06	2.80659e-05
1381	7.89304e-05	8.73626e-06	3.60911e-05	1.31228e-05	3.91922e-06	2.816e-05
1382	7.8875e-05	8.73626e-06	3.60456e-05	1.31969e-05	3.91922e-06	2.81546e-05
1383	7.90413e-05	8.67154e-06	3.59091e-05	1.34193e-05	3.91922e-06	2.81921e-05
1384	7.48287e-05	8.54212e-06	3.43162e-05	1.379e-05	4.70307e-06	2.7236e-05
1385	0.000138073	2.12906e-05	7.37297e-05	3.05456e-05	1.33254e-05	5.53929e-05
1386	0.00014672	2.29084e-05	7.97828e-05	3.15836e-05	1.56769e-05	5.93343e-05
1387	0.000147496	2.31025e-05	8.03289e-05	3.18802e-05	1.56769e-05	5.96969e-05
1388	0.000147662	2.32967e-05	8.04655e-05	3.21026e-05	1.56769e-05	5.98407e-05
1389	0.000147607	2.32967e-05	8.02834e-05	3.22509e-05	1.56769e-05	5.9823e-05
1390	0.000147607	2.3232e-05	8.042e-05	3.22509e-05	1.56769e-05	5.98374e-05
1391	0.000147219	2.28437e-05	7.91911e-05	3.22509e-05	1.56769e-05	5.94363e-05
1392	0.000147551	2.30378e-05	7.78713e-05	3.25474e-05	1.56769e-05	5.93369e-05
1393	0.000153039	2.38144e-05	8.18308e-05	3.3363e-05	1.64607e-05	6.17016e-05
1394	0.000153759	2.40732e-05	8.27411e-05	3.36595e-05	1.72446e-05	6.22955e-05
1395	0.00015448	2.4138e-05	8.31962e-05	3.35112e-05	1.72446e-05	6.2514e-05
1396	0.000151265	2.39438e-05	8.15578e-05	3.32147e-05	1.72446e-05	6.14452e-05
1397	0.000154203	2.42027e-05	8.31962e-05	3.30664e-05	1.72446e-05	6.23826e-05
1398	0.000153815	2.40085e-05	8.29686e-05	3.29923e-05	1.64607e-05	6.2049e-05
1399	0.000137907	2.09023e-05	7.33656e-05	2.79507e-05	1.41092e-05	5.4847e-05
1400	0.000176208	2.75677e-05	9.95351e-05	3.24733e-05	1.80284e-05	7.07625e-05
1401	0.000176651	2.75677e-05	0.000100354	3.23991e-05	1.80284e-05	7.1e-05
1402	0.000177593	2.76972e-05	0.000101401	3.2325e-05	1.80284e-05	7.14089e-05
1403	0.000177483	2.78266e-05	0.000101447	3.2325e-05	1.80284e-05	7.1422e-05
1404	0.000177205	2.75677e-05	0.000101128	3.21767e-05	1.72446e-05	7.10644e-05
1405	0.000147385	2.31673e-05	8.30142e-05	2.5949e-05	1.17577e-05	5.82546e-05
1406	0.000170665	3.00268e-05	9.78056e-05	3.21026e-05	1.88123e-05	6.98825e-05
1407	0.000176263	3.35213e-05	0.000103449	3.41044e-05	1.88123e-05	7.323e-05
1408	0.000175709	3.46862e-05	0.000105179	3.4994e-05	1.88123e-05	7.38761e-05
1409	0.000191229	3.66923e-05	0.000114691	3.64768e-05	2.27315e-05	8.03641e-05
1410	0.000193224	3.66276e-05	0.000114918	3.54389e-05	2.27315e-05	8.0588e-05
1411	0.000193723	3.5851e-05	0.000116056	3.46975e-05	2.27315e-05	8.06118e-05
1412	0.000196827	3.61099e-05	0.000118423	3.46233e-05	2.27315e-05	8.17429e-05
1413	0.000197215	3.61099e-05	0.000118286	3.45492e-05	2.27315e-05	8.17783e-05
1414	0.000195109	3.5398e-05	0.000115555	3.3363e-05	2.27315e-05	8.04313e-05
1415	0.000190952	3.46862e-05	0.00011287	3.08422e-05	2.19477e-05	7.82596e-05
1416	0.00017582	3.21624e-05	0.00010486	2.8099e-05	2.038e-05	7.22643e-05
1417	0.000193723	3.74041e-05	0.000116648	3.63286e-05	2.5083e-05	8.18373e-05
1418	0.000194167	3.75335e-05	0.00011733	3.62544e-05	2.58669e-05	8.22304e-05
1419	0.000193446	3.75983e-05	0.000116966	3.61061e-05	2.58669e-05	8.19967e-05
1420	0.000193113	3.75335e-05	0.000116511	3.59579e-05	2.58669e-05	8.17965e-05
1421	0.000171496	3.05445e-05	9.83518e-05	3.17319e-05	2.42992e-05	7.12847e-05
1422	0.000179035	3.43626e-05	0.000106999	3.71441e-05	2.74346e-05	7.69951e-05
1423	0.000169501	3.30683e-05	0.000104086	3.47716e-05	2.74346e-05	7.37723e-05
1424	0.000169612	3.29389e-05	0.000104177	3.47716e-05	2.74346e-05	7.37868e-05
1425	0.000169335	3.24859e-05	0.000103449	3.43268e-05	2.74346e-05	7.34063e-05
1426	0.000169168	3.22271e-05	0.000102948	3.42526e-05	2.74346e-05	7.32061e-05
1427	0.000157916	2.0514e-05	8.08751e-05	2.89146e-05	2.35153e-05	6.2347e-05
1428	0.000150766	2.01905e-05	7.80533e-05	2.83214e-05	2.35153e-05	6.01693e-05
1429	0.000111134	1.72784e-05	6.33529e-05	2.35023e-05	1.72446e-05	4.65024e-05
1430	0.000113185	1.76019e-05	6.41266e-05	2.40213e-05	1.72446e-05	4.72359e-05
1431	0.000112465	1.76019e-05	6.39446e-05	2.40213e-05	1.72446e-05	4.70555e-05
1432	0.000112132	1.76019e-05	6.35805e-05	2.40213e-05	1.72446e-05	4.69161e-05
1433	0.000107254	1.65018e-05	5.91203e-05	2.31316e-05	1.72446e-05	4.46505e-05
1434	8.91293e-05	1.48193e-05	4.71961e-05	2.15006e-05	1.56769e-05	3.76644e-05
1435	8.65796e-05	1.46899e-05	4.63314e-05	2.15747e-05	1.4893e-05	3.68137e-05
1436	6.1803e-05	1.11306e-05	3.28143e-05	1.72005e-05	1.25415e-05	2.7098e-05
1437	6.28007e-05	1.11953e-05	3.28598e-05	1.61625e-05	9.40614e-06	2.64849e-05
1438	6.28007e-05	1.11953e-05	3.27687e-05	1.61625e-05	9.40614e-06	2.64667e-05
1439	6.22464e-05	1.10659e-05	3.24502e-05	1.60884e-05	9.40614e-06	2.62514e-05
1440	6.20247e-05	1.10659e-05	3.23136e-05	1.58659e-05	9.40614e-06	2.61352e-05
1441	5.27127e-05	7.70085e-06	2.40304e-05	1.18624e-05	8.62229e-06	2.09857e-05
1442	1.22497e-05	1.42369e-06	4.36917e-06	2.15006e-06	1.56769e-06	4.35206e-06
1443	2.00652e-05	2.91209e-06	9.28448e-06	5.26393e-06	4.70307e-06	8.44575e-06
1444	1.98989e-05	3.36508e-06	9.55755e-06	5.33807e-06	4.70307e-06	8.57253e-06
1445	2.12292e-05	4.59462e-06	1.11505e-05	6.52431e-06	4.70307e-06	9.64034e-06
1446	2.18943e-05	4.78876e-06	1.21062e-05	6.89501e-06	6.27076e-06	1.0391e-05
1447	2.0952e-05	5.11233e-06	1.21973e-05	7.11743e-06	7.0546e-06	1.04867e-05
1448	5.26572e-05	1.43016e-05	3.00835e-05	1.80901e-05	2.038e-05	2.71025e-05
1449	5.47635e-05	1.46251e-05	3.12668e-05	1.84608e-05	2.19477e-05	2.82128e-05
1450	5.49298e-05	1.46251e-05	3.12213e-05	1.83867e-05	2.19477e-05	2.82221e-05
1451	5.50407e-05	1.46899e-05	3.12213e-05	1.83867e-05	2.19477e-05	2.82573e-05
1452	5.49298e-05	1.46899e-05	3.11303e-05	1.83867e-05	2.19477e-05	2.82169e-05
1453	5.43201e-05	1.44957e-05	3.09938e-05	1.81643e-05	2.27315e-05	2.81411e-05
1454	9.44504e-05	3.04798e-05	5.85286e-05	4.16666e-05	5.01661e-05	5.50583e-05
1455	9.73327e-05	3.17094e-05	6.13959e-05	4.30753e-05	5.09499e-05	5.68926e-05
1456	0.000105425	3.70158e-05	6.88144e-05	5.13048e-05	5.48691e-05	6.34858e-05
1457	0.00011834	4.63345e-05	8.10571e-05	6.53173e-05	6.74106e-05	7.56919e-05
1458	0.000120225	4.69169e-05	8.22405e-05	6.60587e-05	6.81945e-05	7.67271e-05
1459	0.000120779	4.72405e-05	8.2559e-05	6.64293e-05	6.81945e-05	7.70405e-05
1460	0.000121167	4.73052e-05	8.27411e-05	6.64293e-05	6.81945e-05	7.71674e-05
1461	0.00012089	4.73052e-05	8.26501e-05	6.63552e-05	6.81945e-05	7.7079e-05
1462	0.000121001	4.73699e-05	8.31052e-05	6.64293e-05	6.81945e-05	7.722e-05
1463	0.00013896	6.03772e-05	9.98537e-05	8.62988e-05	7.83845e-05	9.27748e-05
1464	0.000139237	6.05714e-05	0.000100172	8.65213e-05	7.83845e-05	9.29772e-05
1465	0.000139292	6.05714e-05	9.99447e-05	8.62988e-05	7.99522e-05	9.32118e-05
1466	0.000139348	6.05714e-05	9.99902e-05	8.62988e-05	7.99522e-05	9.32321e-05
1467	0.00013896	6.04419e-05	9.95351e-05	8.5854e-05	7.99522e-05	9.29486e-05
1468	0.000129703	5.56532e-05	9.05237e-05	7.97745e-05	7.60329e-05	8.63375e-05
1469	0.000133472	5.59767e-05	9.17525e-05	7.98487e-05	7.60329e-05	8.74166e-05
1470	0.000133361	5.55238e-05	9.1707e-05	7.99228e-05	7.60329e-05	8.73095e-05
1471	0.000123107	5.27411e-05	8.52898e-05	7.629e-05	6.97622e-05	8.1438e-05
1472	0.00013059	5.44236e-05	8.89307e-05	7.844e-05	7.36814e-05	8.52131e-05
1473	0.000127264	5.11233e-05	8.35603e-05	7.43623e-05	6.97622e-05	8.12144e-05
1474	0.000115513	4.80818e-05	7.4913e-05	6.96915e-05	6.5843e-05	7.48085e-05
1475	0.00015132	7.35787e-05	0.000102311	9.46767e-05	7.36814e-05	9.91136e-05
1476	0.000152429	7.38375e-05	0.000103404	9.52698e-05	7.36814e-05	9.97243e-05
1477	0.000151431	7.46141e-05	0.000102539	9.35646e-05	7.21137e-05	9.88525e-05
1478	0.000151764	7.49377e-05	0.00010304	9.36387e-05	7.13299e-05	9.89421e-05
1479	0.000151597	7.442e-05	0.000102539	9.26749e-05	7.0546e-05	9.83554e-05
1480	0.00015193	7.48082e-05	0.000102539	9.26007e-05	7.0546e-05	9.84848e-05
1481	0.00015193	7.42258e-05	0.000102175	9.18593e-05	7.0546e-05	9.81472e-05
1482	0.000151819	7.34493e-05	0.000101674	9.11921e-05	7.0546e-05	9.77361e-05
1483	0.000126765	4.96996e-05	7.26829e-05	6.13878e-05	4.15438e-05	7.04158e-05
1484	0.000141509	6.19303e-05	8.65186e-05	7.38433e-05	4.70307e-05	8.21664e-05
1485	0.000145168	6.73015e-05	9.16615e-05	7.92556e-05	5.01661e-05	8.67105e-05
1486	0.000134858	6.44542e-05	8.43795e-05	7.13226e-05	4.38953e-05	7.97819e-05
1487	0.000143449	7.00842e-05	9.27538e-05	7.71055e-05	4.38953e-05	8.54576e-05
1488	0.000144225	7.08607e-05	9.33454e-05	7.71055e-05	4.46791e-05	8.60431e-05
1489	0.000117342	6.40012e-05	7.94642e-05	6.5688e-05	3.29215e-05	7.18834e-05
1490	0.000133639	7.65555e-05	9.5348e-05	7.40658e-05	3.76245e-05	8.34466e-05
1491	0.000133805	7.66849e-05	9.54845e-05	7.44365e-05	3.68407e-05	8.34503e-05
1492	0.000112686	7.43552e-05	8.95679e-05	7.2064e-05	2.90023e-05	7.55351e-05
1493	0.000148826	0.000102376	0.000120835	0.000101942	3.91922e-05	0.000102634
1494	0.000152595	0.000105029	0.00012393	0.000104908	3.99761e-05	0.000105288
1495	0.000157972	0.000110595	0.000130893	0.000108244	4.07599e-05	0.000109693
1496	0.000158526	0.000111759	0.000131257	0.000108096	3.99761e-05	0.000109923
1497	0.000156364	0.000112212	0.000130347	0.000108467	3.91922e-05	0.000109316
1498	0.000175265	0.000140104	0.000151874	0.0001293	4.46791e-05	0.000128244
1499	0.00017582	0.000140815	0.000152511	0.000129522	4.46791e-05	0.000128669
1500	0.000176041	0.000141139	0.00015283	0.000129522	4.46791e-05	0.000128842
1501	0.000175764	0.000140686	0.000152329	0.000128855	4.46791e-05	0.000128463
1502	0.000175764	0.000140686	0.000152375	0.000128707	4.46791e-05	0.000128442
1503	0.000175709	0.000140492	0.000151965	0.000128336	4.46791e-05	0.000128236
1504	0.000169833	0.00013415	0.000144456	0.000122553	4.38953e-05	0.000122977
1505	0.000171275	0.000135444	0.000146048	0.000123072	4.38953e-05	0.000123947
1506	0.000171496	0.000135703	0.000146276	0.000122998	4.38953e-05	0.000124074
1507	0.000171496	0.000135638	0.000146231	0.000123072	4.38953e-05	0.000124066
1508	0.000170942	0.000135315	0.00014573	0.000122924	4.38953e-05	0.000123761
1509	0.000170887	0.000135315	0.000145593	0.000122924	4.38953e-05	0.000123723
1510	0.000170887	0.000135056	0.000145411	0.00012285	4.38953e-05	0.00012362
1511	0.000170887	0.000134927	0.000145184	0.000122553	4.38953e-05	0.000123489
1512	0.000166009	0.000126837	0.000136354	0.000116251	4.31115e-05	0.000117713
1513	0.000160632	0.000123149	0.000129619	0.000111803	4.15438e-05	0.000113349
1514	0.000152207	0.000115383	0.000121882	0.000102387	3.5273e-05	0.000105426
1515	0.000152651	0.000115124	0.000121745	0.000102017	3.5273e-05	0.000105362
1516	0.000151653	0.000113571	0.000120835	9.97923e-05	3.44892e-05	0.000104068
1517	0.000119781	7.2155e-05	8.46526e-05	6.50948e-05	2.35153e-05	7.30397e-05
1518	7.4219e-05	3.83748e-05	4.84249e-05	3.46233e-05	1.4893e-05	4.2107e-05
1519	7.52721e-05	3.85042e-05	4.91531e-05	3.41044e-05	1.41092e-05	4.22286e-05
1520	5.03292e-05	2.43321e-05	3.12213e-05	2.18713e-05	8.62229e-06	2.72752e-05
1521	7.86533e-05	2.6597e-05	4.93352e-05	2.29092e-05	1.019e-05	3.75369e-05
1522	7.90967e-05	2.56263e-05	4.97448e-05	2.10557e-05	8.62229e-06	3.68292e-05
1523	7.84316e-05	2.3685e-05	4.84704e-05	1.99436e-05	7.83845e-06	3.56738e-05
1524	7.76001e-05	2.29731e-05	4.76057e-05	1.95729e-05	7.0546e-06	3.49613e-05
1525	6.1027e-05	1.13248e-05	3.44072e-05	1.17882e-05	4.70307e-06	2.46501e-05
1526	9.70002e-05	2.12906e-05	5.55703e-05	2.15006e-05	6.27076e-06	4.03265e-05
1527	9.88293e-05	2.19377e-05	5.67081e-05	2.18713e-05	6.27076e-06	4.11234e-05
1528	9.9051e-05	2.20024e-05	5.65716e-05	2.16489e-05	6.27076e-06	4.11089e-05
1529	0.000100049	2.2326e-05	5.74363e-05	2.20196e-05	6.27076e-06	4.16203e-05
1530	0.000100437	2.24554e-05	5.74363e-05	2.20937e-05	6.27076e-06	4.17386e-05
1531	0.000101268	2.21318e-05	5.76184e-05	2.19454e-05	7.0546e-06	4.20036e-05
1532	0.000103707	2.31025e-05	6.01671e-05	2.30575e-05	7.0546e-06	4.34177e-05
1533	0.000104372	2.34261e-05	6.13959e-05	2.32799e-05	7.0546e-06	4.39057e-05
1534	0.000104594	2.34261e-05	6.16235e-05	2.32058e-05	7.0546e-06	4.39808e-05
1535	0.000105093	2.34261e-05	6.20331e-05	2.32058e-05	7.0546e-06	4.41625e-05
1536	0.000105204	2.34908e-05	6.20786e-05	2.32058e-05	7.0546e-06	4.42068e-05
1537	0.000105093	2.33614e-05	6.176e-05	2.29092e-05	7.0546e-06	4.40356e-05
1538	0.000104705	2.31025e-05	6.09863e-05	2.26127e-05	7.0546e-06	4.36922e-05
1539	0.000104871	2.31025e-05	6.10318e-05	2.25385e-05	7.0546e-06	4.37197e-05
1540	0.000103042	2.22613e-05	5.85286e-05	2.13523e-05	6.27076e-06	4.2291e-05
1541	0.000103042	2.22613e-05	5.84831e-05	2.12782e-05	6.27076e-06	4.22671e-05
1542	0.000100658	2.18083e-05	5.64351e-05	2.06109e-05	5.48691e-06	4.09998e-05
1543	6.09161e-05	1.35897e-05	3.23591e-05	1.30486e-05	2.35153e-06	2.4453e-05
1544	6.79001e-05	1.37839e-05	3.40886e-05	1.31228e-05	3.13538e-06	2.64062e-05
1545	6.92858e-05	1.38486e-05	3.44982e-05	1.30486e-05	3.13538e-06	2.67633e-05
1546	6.67915e-05	1.3072e-05	3.25412e-05	1.20848e-05	3.13538e-06	2.5525e-05
1547	6.79001e-05	1.3072e-05	3.28598e-05	1.20107e-05	3.13538e-06	2.57956e-05
1548	6.82327e-05	1.3072e-05	3.29053e-05	1.20107e-05	3.13538e-06	2.58712e-05
1549	6.80664e-05	1.3072e-05	3.28598e-05	1.19365e-05	3.13538e-06	2.5814e-05
1550	6.60155e-05	1.22308e-05	3.12668e-05	1.1121e-05	3.13538e-06	2.47539e-05
1551	6.05281e-05	1.05482e-05	2.799e-05	9.11921e-06	2.35153e-06	2.21074e-05
1552	5.96967e-05	1.04188e-05	2.74893e-05	8.00711e-06	2.35153e-06	2.15927e-05
1553	5.96967e-05	1.04188e-05	2.74438e-05	8.00711e-06	2.35153e-06	2.15836e-05
1554	5.79784e-05	1.02894e-05	2.6306e-05	7.56227e-06	2.35153e-06	2.08975e-05
1555	1.93446e-05	7.11843e-07	4.77878e-06	5.93119e-07	7.83845e-07	5.24244e-06
1556	2.17835e-05	8.41269e-07	5.68902e-06	7.41399e-07	7.83845e-07	5.96781e-06
1557	2.1728e-05	8.41269e-07	5.64351e-06	6.67259e-07	7.83845e-07	5.93278e-06
1558	1.94555e-05	7.76556e-07	4.77878e-06	3.70699e-07	7.83845e-07	5.23308e-06
1559	2.31692e-05	1.22955e-06	6.7358e-06	7.41399e-07	7.83845e-07	6.53196e-06
1560	2.31692e-05	1.22955e-06	6.82682e-06	7.41399e-07	7.83845e-07	6.55016e-06
1561	2.31692e-05	1.22955e-06	6.82682e-06	7.41399e-07	7.83845e-07	6.55016e-06
1562	2.2504e-05	1.22955e-06	6.78131e-06	6.67259e-07	7.83845e-07	6.39319e-06
1563	2.19497e-05	1.22955e-06	6.64477e-06	6.67259e-07	7.83845e-07	6.25502e-06
1564	2.06749e-05	1.22955e-06	6.14414e-06	5.18979e-07	7.83845e-07	5.87028e-06
1565	2.21715e-05	1.29426e-06	6.32619e-06	5.93119e-07	7.83845e-07	6.23378e-06
1566	2.20606e-05	1.29426e-06	6.28068e-06	5.93119e-07	7.83845e-07	6.2025e-06
1567	2.10075e-05	1.22955e-06	6.0076e-06	5.93119e-07	7.83845e-07	5.92432e-06
1568	1.68503e-05	9.70695e-07	5.37043e-06	5.93119e-07	7.83845e-07	4.91368e-06
1569	1.74046e-05	9.70695e-07	5.37043e-06	5.93119e-07	0	4.86777e-06
1570	1.61852e-05	9.70695e-07	5.00634e-06	5.93119e-07	0	4.55107e-06
1571	1.24714e-05	9.05982e-07	4.09609e-06	5.93119e-07	0	3.61332e-06
1572	1.33029e-05	1.03541e-06	4.27814e-06	8.15539e-07	0	3.8864e-06
1573	1.2028e-05	9.70695e-07	3.732e-06	8.15539e-07	0	3.50925e-06
1574	1.97326e-05	1.4884e-06	5.64351e-06	1.40866e-06	1.56769e-06	5.96817e-06
1575	2.08966e-05	1.55311e-06	5.87107e-06	1.33452e-06	1.56769e-06	6.2446e-06
1576	2.02315e-05	1.61783e-06	5.68902e-06	1.33452e-06	1.56769e-06	6.08811e-06
1577	2.27812e-05	1.68254e-06	6.78131e-06	1.55694e-06	2.35153e-06	7.0307e-06
1578	2.28366e-05	1.68254e-06	6.96336e-06	1.63108e-06	2.35153e-06	7.09302e-06
1579	2.10629e-05	1.35897e-06	5.41595e-06	1.26038e-06	2.35153e-06	6.28995e-06
1580	2.57743e-05	1.61783e-06	6.87233e-06	1.92764e-06	2.35153e-06	7.70873e-06
1581	2.54972e-05	1.61783e-06	6.59926e-06	1.92764e-06	2.35153e-06	7.59869e-06
1582	4.43984e-05	4.91819e-06	1.6703e-05	8.74851e-06	8.62229e-06	1.66781e-05
1583	4.53406e-05	4.9829e-06	1.72036e-05	8.82265e-06	8.62229e-06	1.69944e-05
1584	4.58395e-05	5.11233e-06	1.79318e-05	8.89679e-06	8.62229e-06	1.72805e-05
1585	4.59504e-05	5.11233e-06	1.79318e-05	8.89679e-06	8.62229e-06	1.73027e-05
1586	4.58949e-05	5.11233e-06	1.79318e-05	8.97093e-06	8.62229e-06	1.73065e-05
1587	4.59504e-05	5.11233e-06	1.79318e-05	8.97093e-06	8.62229e-06	1.73176e-05
1588	4.59504e-05	5.11233e-06	1.78863e-05	8.97093e-06	8.62229e-06	1.73085e-05
1589	4.31235e-05	5.04761e-06	1.75677e-05	8.97093e-06	8.62229e-06	1.66664e-05
1590	6.30224e-05	1.3978e-05	3.67738e-05	1.95729e-05	1.25415e-05	2.91777e-05
1591	7.01173e-05	1.82491e-05	4.58307e-05	2.50593e-05	1.4893e-05	3.48299e-05
1592	7.18355e-05	1.93492e-05	4.8516e-05	2.63197e-05	1.4893e-05	3.61827e-05
1593	7.31104e-05	1.99963e-05	5.0564e-05	2.72835e-05	1.4893e-05	3.71694e-05
1594	7.39418e-05	2.05787e-05	5.21569e-05	2.80249e-05	1.4893e-05	3.79191e-05
1595	7.24453e-05	2.0514e-05	5.22479e-05	2.83214e-05	1.4893e-05	3.76843e-05
1596	9.66122e-05	2.8862e-05	7.25919e-05	3.85527e-05	1.95961e-05	5.1243e-05
1597	9.70002e-05	2.89914e-05	7.29105e-05	3.8701e-05	1.95961e-05	5.14398e-05
1598	9.70002e-05	2.89914e-05	7.2956e-05	3.86269e-05	1.95961e-05	5.14341e-05
1599	9.72219e-05	2.89914e-05	7.3047e-05	3.86269e-05	1.95961e-05	5.14967e-05
1600	9.72219e-05	2.90561e-05	7.3229e-05	3.8701e-05	1.95961e-05	5.15608e-05
1601	9.38962e-05	2.86031e-05	7.18637e-05	3.78855e-05	1.88123e-05	5.02122e-05
1602	8.99053e-05	2.83443e-05	7.09534e-05	3.76631e-05	1.88123e-05	4.91357e-05
1603	0.000111744	4.1481e-05	9.51659e-05	5.85705e-05	2.66507e-05	6.67224e-05
1604	0.000111744	4.18693e-05	9.63947e-05	5.89412e-05	2.66507e-05	6.712e-05
1605	0.000111966	4.18693e-05	9.64858e-05	5.89412e-05	2.66507e-05	6.71826e-05
1606	0.000112077	4.1934e-05	9.64402e-05	5.89412e-05	2.66507e-05	6.72086e-05
1607	0.000112077	4.1934e-05	9.64858e-05	5.90895e-05	2.66507e-05	6.72474e-05
1608	0.000110469	4.17399e-05	9.59396e-05	5.84964e-05	2.66507e-05	6.66591e-05
1609	0.000110469	4.17399e-05	9.58941e-05	5.84964e-05	2.66507e-05	6.665e-05
1610	0.000109915	4.14163e-05	9.51659e-05	5.81257e-05	2.66507e-05	6.62547e-05
1611	0.00010997	4.12869e-05	9.48473e-05	5.79033e-05	2.66507e-05	6.61316e-05
1612	0.000102931	3.54627e-05	8.36058e-05	5.10083e-05	1.95961e-05	5.85208e-05
1613	8.95727e-05	2.92503e-05	6.81772e-05	4.42615e-05	1.72446e-05	4.97013e-05
1614	8.9739e-05	2.92503e-05	6.82227e-05	4.44839e-05	1.72446e-05	4.97881e-05
1615	8.45841e-05	2.66618e-05	6.26247e-05	4.18149e-05	1.4893e-05	4.61157e-05
1616	5.54287e-05	1.96728e-05	4.56032e-05	3.21767e-05	1.09738e-05	3.2771e-05
1617	8.03161e-05	2.25848e-05	5.30672e-05	3.73665e-05	1.09738e-05	4.08617e-05
1618	8.17018e-05	2.28437e-05	5.36588e-05	3.77372e-05	1.09738e-05	4.13831e-05
1619	8.20344e-05	2.2779e-05	5.38864e-05	3.78113e-05	1.09738e-05	4.1497e-05
1620	7.95401e-05	2.11612e-05	5.07005e-05	3.47716e-05	1.019e-05	3.92727e-05
1621	8.33647e-05	2.18083e-05	5.2521e-05	3.6032e-05	1.09738e-05	4.094e-05
1622	8.28104e-05	2.10964e-05	5.13832e-05	3.37337e-05	1.09738e-05	3.99995e-05
1623	8.14801e-05	1.98669e-05	4.91076e-05	3.12129e-05	1.019e-05	3.83715e-05
1624	7.71567e-05	1.66312e-05	4.21898e-05	2.51334e-05	7.0546e-06	3.36331e-05
1625	5.77567e-05	8.73626e-06	2.50317e-05	1.60884e-05	3.91922e-06	2.23065e-05
1626	7.95401e-05	1.81196e-05	4.35551e-05	2.90628e-05	9.40614e-06	3.59367e-05
1627	8.73556e-05	2.21318e-05	5.21114e-05	3.52906e-05	1.33254e-05	4.2043e-05
1628	8.69121e-05	2.20671e-05	5.14742e-05	3.57354e-05	1.33254e-05	4.19028e-05
1629	8.55819e-05	2.18083e-05	5.03819e-05	3.6032e-05	1.33254e-05	4.14259e-05
1630	8.75219e-05	2.3232e-05	5.21114e-05	3.62544e-05	1.33254e-05	4.2489e-05
1631	8.6247e-05	2.31673e-05	5.13832e-05	3.59579e-05	1.33254e-05	4.20162e-05
1632	8.70784e-05	2.36202e-05	5.25665e-05	3.61803e-05	1.33254e-05	4.25542e-05
1633	8.69121e-05	2.36202e-05	5.24755e-05	3.61803e-05	1.33254e-05	4.25027e-05
1634	8.13693e-05	2.23907e-05	4.93352e-05	3.38819e-05	1.33254e-05	4.00605e-05
1635	8.73001e-05	2.76325e-05	5.67992e-05	3.63286e-05	1.41092e-05	4.44339e-05
1636	8.70784e-05	2.77619e-05	5.69357e-05	3.61803e-05	1.41092e-05	4.44131e-05
1637	8.70784e-05	2.77619e-05	5.69812e-05	3.62544e-05	1.41092e-05	4.4437e-05
1638	8.69676e-05	2.77619e-05	5.69812e-05	3.61803e-05	1.41092e-05	4.44e-05
1639	8.68013e-05	2.76972e-05	5.68902e-05	3.61061e-05	1.41092e-05	4.43208e-05
1640	8.66904e-05	2.76972e-05	5.66626e-05	3.58837e-05	1.41092e-05	4.42086e-05
1641	8.59699e-05	2.76972e-05	5.63896e-05	3.55872e-05	1.41092e-05	4.39506e-05
1642	8.57481e-05	2.76325e-05	5.6344e-05	3.5513e-05	1.41092e-05	4.38694e-05
1643	8.53047e-05	2.7503e-05	5.60255e-05	3.52906e-05	1.41092e-05	4.36466e-05
1644	6.97293e-05	2.39438e-05	4.82884e-05	2.87663e-05	1.17577e-05	3.64971e-05
1645	6.92304e-05	2.39438e-05	4.81519e-05	2.84697e-05	1.17577e-05	3.63107e-05
1646	3.46983e-05	1.68254e-05	2.97194e-05	1.57177e-05	2.35153e-06	1.98625e-05
1647	4.18486e-05	1.88962e-05	3.31784e-05	1.67556e-05	3.13538e-06	2.27628e-05
1648	2.8324e-05	1.4884e-05	2.30747e-05	1.06761e-05	3.13538e-06	1.60188e-05
1649	5.71469e-05	2.26496e-05	3.81847e-05	1.62366e-05	7.0546e-06	2.82545e-05
1650	5.75904e-05	2.26496e-05	3.83212e-05	1.61625e-05	7.0546e-06	2.83557e-05
1651	5.65372e-05	2.13553e-05	3.65918e-05	1.50504e-05	7.0546e-06	2.73179e-05
1652	5.43755e-05	2.11612e-05	3.5545e-05	1.4828e-05	6.27076e-06	2.64361e-05
1653	7.67687e-05	4.71111e-05	5.50697e-05	4.07028e-05	3.5273e-05	5.09851e-05
1654	7.95956e-05	5.00232e-05	5.72088e-05	4.41874e-05	3.91922e-05	5.40414e-05
1655	7.98727e-05	5.01526e-05	5.74363e-05	4.47064e-05	3.91922e-05	5.4272e-05
1656	7.99836e-05	5.0282e-05	5.74818e-05	4.46322e-05	3.91922e-05	5.43144e-05
1657	8.00944e-05	5.03467e-05	5.75274e-05	4.47805e-05	3.91922e-05	5.43882e-05
1658	7.81544e-05	4.82759e-05	5.48421e-05	4.35943e-05	3.91922e-05	5.28118e-05
1659	7.7711e-05	5.1641e-05	5.47511e-05	4.6115e-05	3.99761e-05	5.40388e-05
1660	8.30876e-05	5.9536e-05	6.17145e-05	5.16755e-05	4.46791e-05	6.01385e-05
1661	8.00944e-05	5.85006e-05	5.92113e-05	5.0341e-05	4.5463e-05	5.87221e-05
1662	0.000113795	0.000132468	0.000103631	0.000104167	6.89783e-05	0.000104608
1663	0.000114405	0.000136739	0.000105315	0.000105649	7.0546e-05	0.000106531
1664	0.00011568	0.000140233	0.000106817	0.000106465	7.0546e-05	0.000107948
1665	0.000116012	0.000141268	0.000107272	0.000106613	7.13299e-05	0.000108499
1666	0.000115735	0.00014101	0.000106954	0.000106242	7.13299e-05	0.000108254
1667	0.000115402	0.000141333	0.000106954	0.000106613	7.52491e-05	0.00010911
1668	0.000112243	0.000140363	0.00010304	0.000107058	7.83845e-05	0.000108218
1669	0.00010925	0.000143016	0.000101947	0.000109801	8.30875e-05	0.00010942
1670	9.92173e-05	0.000142757	9.70774e-05	0.000110987	8.46552e-05	0.000106939
1671	0.000200541	0.000328095	0.00023152	0.000334519	0.000471091	0.000313153
1672	0.00020625	0.000337672	0.000242898	0.000347642	0.000488335	0.000324559
1673	0.000212347	0.000355016	0.000255414	0.000368327	0.000504012	0.000339023
1674	0.000216615	0.000365499	0.000263015	0.000381524	0.000521257	0.000349582
1675	0.000217003	0.000366081	0.000263697	0.00038271	0.000522041	0.000350306
1676	0.000217502	0.000366793	0.00026438	0.000383377	0.000522041	0.000350819
1677	0.000218001	0.000367246	0.000264517	0.0003836	0.000522041	0.000351081
1678	0.000218333	0.000367635	0.000264835	0.000383674	0.000522041	0.000351304
1679	0.000218333	0.000367635	0.000264881	0.000383748	0.000522041	0.000351328
1680	0.000218389	0.000367829	0.00026529	0.000383822	0.000522041	0.000351474
1681	0.000218721	0.000368023	0.0002657	0.000384267	0.000522041	0.00035175
1682	0.000218444	0.000366146	0.000265108	0.000384267	0.000523608	0.000351515
1683	0.000216005	0.000363105	0.000263288	0.000388864	0.000532231	0.000352699
1684	0.000220772	0.000381871	0.00027594	0.000408066	0.000547907	0.000366911
1685	0.000217447	0.000375271	0.000271935	0.000405471	0.000553394	0.000364704
1686	0.00021462	0.000375206	0.00026834	0.000415109	0.000569071	0.000368469
1687	0.000223544	0.00040012	0.000286863	0.000443208	0.000588667	0.00038848
1688	0.00022687	0.000411898	0.00029633	0.000454848	0.000598073	0.000397604
1689	0.000227479	0.000413516	0.000297604	0.000456702	0.000598857	0.000398832
1690	0.000227313	0.000411704	0.000296193	0.000453588	0.00059729	0.000397218
1691	0.000227424	0.000409957	0.000295419	0.000451883	0.00059337	0.000395611
1692	0.000196938	0.00032926	0.000243262	0.000371144	0.000496174	0.000327356
1693	0.000199543	0.000332366	0.00024663	0.000374777	0.000498525	0.000330368
1694	0.000188291	0.00030894	0.00022929	0.000342378	0.000466388	0.000307057
1695	0.000191229	0.000313987	0.000234524	0.000346011	0.000467955	0.000310741
1696	0.000191229	0.000314376	0.00023507	0.000345863	0.000467171	0.000310742
1697	0.000191284	0.000314182	0.000235207	0.000345788	0.000467171	0.000310726
1698	0.000190287	0.000312693	0.000233614	0.00034349	0.000465604	0.000309138
1699	0.000189511	0.000311917	0.000233068	0.000342749	0.000465604	0.00030857
1700	0.0001894	0.00031114	0.000232658	0.000342156	0.00046482	0.000308035
1701	0.000188624	0.000309911	0.00023193	0.000341044	0.000464036	0.000307109
1702	0.000186795	0.000307516	0.000230291	0.000338004	0.000462468	0.000305015
1703	0.000185797	0.000304669	0.000228289	0.000330442	0.000456198	0.000301079
1704	0.000185464	0.000303569	0.000227697	0.000328885	0.00045463	0.000300049
1705	0.000183469	0.000297292	0.000223647	0.000320729	0.000443656	0.000293759
1706	0.000181085	0.000289914	0.000218322	0.000312426	0.000432682	0.000286886
1707	9.68893e-05	0.000116095	0.000100445	0.000130264	0.000119928	0.000112724
1708	9.8275e-05	0.000116354	0.000100764	0.000130264	0.000118361	0.000112804
1709	8.05933e-05	0.000102052	8.35148e-05	0.000113137	0.000105819	9.70232e-05
1710	3.32572e-05	5.92124e-05	4.76057e-05	6.20551e-05	5.5653e-05	5.15567e-05
1711	5.17704e-05	6.57484e-05	6.05312e-05	7.68089e-05	6.89783e-05	6.47674e-05
1712	5.27681e-05	6.58778e-05	6.16235e-05	7.71055e-05	6.97622e-05	6.54274e-05
1713	5.31561e-05	6.53601e-05	6.1669e-05	7.66607e-05	6.97622e-05	6.53216e-05
1714	4.43984e-05	3.39096e-05	4.39192e-05	5.16014e-05	4.93822e-05	4.46422e-05
1715	5.95858e-05	5.13821e-05	6.59926e-05	7.50296e-05	7.28976e-05	6.49775e-05
1716	6.09161e-05	5.20293e-05	6.82682e-05	7.70314e-05	7.36814e-05	6.63853e-05
1717	5.63155e-05	4.69816e-05	6.26702e-05	6.80604e-05	5.64368e-05	5.80929e-05
1718	5.62601e-05	4.70464e-05	6.26702e-05	6.80604e-05	5.64368e-05	5.80948e-05
1719	5.61492e-05	4.67875e-05	6.26247e-05	6.75414e-05	5.64368e-05	5.79079e-05
1720	5.62601e-05	4.69169e-05	6.27157e-05	6.74673e-05	5.64368e-05	5.79594e-05
1721	5.55395e-05	4.54285e-05	6.11683e-05	6.50948e-05	5.5653e-05	5.65768e-05
1722	5.18812e-05	3.85042e-05	5.43415e-05	6.0424e-05	5.17337e-05	5.13769e-05
1723	5.16595e-05	3.81807e-05	5.4205e-05	6.00533e-05	5.09499e-05	5.10097e-05
1724	4.59504e-05	3.28742e-05	4.76967e-05	5.06376e-05	4.93822e-05	4.53082e-05
1725	5.10498e-05	3.47509e-05	5.22935e-05	5.17496e-05	4.93822e-05	4.78452e-05
1726	5.12161e-05	3.48156e-05	5.2339e-05	5.14531e-05	4.93822e-05	4.78412e-05
1727	5.14378e-05	3.48803e-05	5.31582e-05	5.16755e-05	4.78145e-05	4.77933e-05
1728	5.65927e-05	3.82454e-05	5.82556e-05	5.53084e-05	4.85984e-05	5.14001e-05
1729	5.78675e-05	3.86337e-05	5.89382e-05	5.56791e-05	4.85984e-05	5.19434e-05
1730	5.72578e-05	3.85689e-05	5.7937e-05	5.47894e-05	4.85984e-05	5.14303e-05
1731	5.72578e-05	3.86337e-05	5.7937e-05	5.47894e-05	4.85984e-05	5.14433e-05
1732	5.71469e-05	3.86984e-05	5.78915e-05	5.4567e-05	4.78145e-05	5.12237e-05
1733	5.69807e-05	3.85689e-05	5.76184e-05	5.42704e-05	4.78145e-05	5.10506e-05
1734	4.48972e-05	2.48498e-05	3.9459e-05	3.41044e-05	2.97861e-05	3.46193e-05
1735	4.71144e-05	2.60146e-05	4.1143e-05	3.57354e-05	2.97861e-05	3.59587e-05
1736	4.71144e-05	2.60793e-05	4.11885e-05	3.57354e-05	2.97861e-05	3.59807e-05
1737	4.70035e-05	2.59499e-05	4.09154e-05	3.4994e-05	2.97861e-05	3.57298e-05
1738	4.49526e-05	2.33614e-05	3.58181e-05	2.78766e-05	2.11638e-05	3.06345e-05
1739	2.46103e-05	1.19072e-05	1.93882e-05	1.25296e-05	3.91922e-06	1.44709e-05
1740	4.09064e-05	3.95396e-05	4.36006e-05	4.67823e-05	9.40614e-06	3.6047e-05
1741	4.63384e-05	4.96996e-05	5.4205e-05	6.1462e-05	1.4893e-05	4.53196e-05
1742	4.58949e-05	5.18998e-05	5.61165e-05	6.39086e-05	1.4893e-05	4.65426e-05
1743	4.80566e-05	5.9536e-05	6.09408e-05	7.33244e-05	1.56769e-05	5.15069e-05
1744	5.04955e-05	6.6978e-05	6.58561e-05	8.19987e-05	1.64607e-05	5.63578e-05
1745	5.25464e-05	7.47435e-05	7.01342e-05	9.31939e-05	1.64607e-05	6.14157e-05
1746	5.36549e-05	8.12795e-05	7.31835e-05	0.00010083	1.80284e-05	6.53953e-05
1747	5.10498e-05	8.24444e-05	7.1181e-05	0.000102684	1.72446e-05	6.49208e-05
1748	5.68144e-05	9.62282e-05	8.11937e-05	0.000112693	1.72446e-05	7.28348e-05
1749	5.77012e-05	9.74578e-05	8.2377e-05	0.000113879	1.72446e-05	7.37319e-05
1750	5.7923e-05	9.82343e-05	8.28776e-05	0.000114027	1.72446e-05	7.40613e-05
1751	5.78675e-05	9.82343e-05	8.28776e-05	0.000114027	1.72446e-05	7.40502e-05
1752	5.77567e-05	9.81049e-05	8.27411e-05	0.000114027	1.72446e-05	7.39749e-05
1753	5.77567e-05	9.81049e-05	8.27411e-05	0.000114027	1.72446e-05	7.39749e-05
1754	5.77567e-05	9.81049e-05	8.27411e-05	0.000114027	1.72446e-05	7.39749e-05
1755	5.77567e-05	9.81049e-05	8.27411e-05	0.000114027	1.72446e-05	7.39749e-05
1756	5.74795e-05	9.79755e-05	8.2559e-05	0.000113953	1.72446e-05	7.38423e-05
1757	5.74241e-05	9.79755e-05	8.2559e-05	0.000113879	1.64607e-05	7.36597e-05
1758	5.73687e-05	9.79755e-05	8.25135e-05	0.000113805	1.64607e-05	7.36247e-05
1759	5.73687e-05	9.79755e-05	8.25135e-05	0.000113805	1.64607e-05	7.36247e-05
1760	5.73687e-05	9.79755e-05	8.25135e-05	0.000113805	1.64607e-05	7.36247e-05
1761	5.73687e-05	9.79755e-05	8.2468e-05	0.000113731	1.64607e-05	7.36008e-05
1762	5.73687e-05	9.79755e-05	8.24225e-05	0.000113731	1.64607e-05	7.35917e-05
1763	5.73687e-05	9.79755e-05	8.24225e-05	0.000113656	1.64607e-05	7.35767e-05
1764	5.72578e-05	9.79108e-05	8.2377e-05	0.000113656	1.64607e-05	7.35325e-05
1765	5.72578e-05	9.79108e-05	8.2286e-05	0.000113656	1.64607e-05	7.35143e-05
1766	5.72578e-05	9.77813e-05	8.21949e-05	0.00011336	1.64607e-05	7.34109e-05
1767	5.54841e-05	8.7492e-05	7.46399e-05	0.000102684	1.4893e-05	6.70386e-05
1768	5.47081e-05	8.62624e-05	7.25464e-05	9.92733e-05	1.4893e-05	6.55366e-05
1769	6.65144e-07	1.29426e-06	5.46146e-07	1.03796e-06	7.83845e-07	8.65471e-07
1770	4.97195e-05	9.90109e-05	7.60963e-05	0.000103573	4.70307e-05	7.50861e-05
1771	5.08281e-05	0.000100758	7.77803e-05	0.000105279	4.70307e-05	7.63352e-05
1772	5.08281e-05	0.000100888	7.80533e-05	0.000105427	4.70307e-05	7.64454e-05
1773	5.09389e-05	0.000101017	7.82809e-05	0.000105575	4.70307e-05	7.65685e-05
1774	5.09389e-05	0.000101017	7.83264e-05	0.000105649	4.70307e-05	7.65924e-05
1775	5.09944e-05	0.000101017	7.83264e-05	0.000105649	4.70307e-05	7.66035e-05
1776	5.09944e-05	0.000101017	7.83264e-05	0.000105649	4.70307e-05	7.66035e-05
1777	5.09944e-05	0.000101017	7.83264e-05	0.000105649	4.70307e-05	7.66035e-05
1778	5.09944e-05	0.000101017	7.83264e-05	0.000105649	4.70307e-05	7.66035e-05
1779	5.09944e-05	0.000101017	7.83264e-05	0.000105649	4.70307e-05	7.66035e-05
1780	5.09944e-05	0.000101017	7.83719e-05	0.000105723	4.70307e-05	7.66274e-05
1781	5.10498e-05	0.000101017	7.84629e-05	0.000105723	4.70307e-05	7.66567e-05
1782	5.11052e-05	0.000101017	7.84629e-05	0.000105723	4.70307e-05	7.66678e-05
1783	5.10498e-05	0.000101017	7.84629e-05	0.000105723	4.70307e-05	7.66567e-05
1784	5.10498e-05	0.000101017	7.85085e-05	0.000105723	4.70307e-05	7.66658e-05
1785	5.10498e-05	0.000101082	7.8554e-05	0.000105723	4.70307e-05	7.66879e-05
1786	5.11052e-05	0.000101082	7.85995e-05	0.000105723	4.70307e-05	7.67081e-05
1787	5.11052e-05	0.000101146	7.85995e-05	0.000105649	4.70307e-05	7.67061e-05
1788	5.12161e-05	0.000100952	7.88726e-05	0.000105872	4.70307e-05	7.67887e-05
1789	5.12715e-05	9.71342e-05	7.69155e-05	0.000101942	4.5463e-05	7.45452e-05
1790	5.04401e-05	8.78803e-05	7.06804e-05	9.13404e-05	4.15438e-05	6.8377e-05
1791	4.97195e-05	8.05677e-05	6.69484e-05	8.31108e-05	3.99761e-05	6.40645e-05
1792	4.82784e-05	7.24786e-05	6.15779e-05	7.54744e-05	3.37053e-05	5.83029e-05
1793	4.43984e-05	5.23528e-05	4.81519e-05	5.51601e-05	2.82184e-05	4.56563e-05
1794	2.96543e-05	2.42674e-05	2.70797e-05	2.69128e-05	1.41092e-05	2.44047e-05
1795	3.79686e-05	2.80854e-05	3.01746e-05	2.98784e-05	1.41092e-05	2.80432e-05
1796	3.77469e-05	2.69206e-05	2.90823e-05	2.72093e-05	1.41092e-05	2.70137e-05
1797	3.78578e-05	2.71147e-05	2.92643e-05	2.72093e-05	1.41092e-05	2.71111e-05
1798	3.75252e-05	2.68559e-05	2.83541e-05	2.60972e-05	1.41092e-05	2.65883e-05
1799	2.716e-05	1.29426e-05	1.4928e-05	1.23814e-05	3.13538e-06	1.41095e-05
1800	3.13726e-05	1.50134e-05	1.72946e-05	1.3271e-05	4.70307e-06	1.63309e-05
1801	3.13172e-05	1.50781e-05	1.72946e-05	1.3271e-05	4.70307e-06	1.63328e-05
1802	3.14281e-05	1.50781e-05	1.72491e-05	1.31969e-05	4.70307e-06	1.63311e-05
1803	2.9488e-05	1.33956e-05	1.57472e-05	1.0083e-05	3.13538e-06	1.43698e-05
1804	2.40006e-05	1.12601e-05	1.26524e-05	7.26571e-06	2.35153e-06	1.15061e-05
1805	3.19823e-05	1.38486e-05	1.89786e-05	8.52609e-06	3.13538e-06	1.52942e-05
1806	3.19823e-05	1.37192e-05	1.91606e-05	8.30367e-06	3.13538e-06	1.52602e-05
1807	3.20932e-05	1.37839e-05	1.92061e-05	8.30367e-06	3.13538e-06	1.53045e-05
1808	3.18715e-05	1.37839e-05	1.92972e-05	8.30367e-06	3.13538e-06	1.52783e-05
1809	3.10955e-05	1.29426e-05	1.80683e-05	7.93297e-06	3.13538e-06	1.4635e-05
1810	2.86566e-05	1.25543e-05	1.68395e-05	7.41399e-06	3.13538e-06	1.372e-05
1811	3.65275e-05	1.75372e-05	2.48496e-05	1.06761e-05	3.13538e-06	1.85452e-05
1812	3.69155e-05	1.76019e-05	2.54868e-05	1.07503e-05	3.13538e-06	1.8778e-05
1813	3.40332e-05	1.60488e-05	2.38484e-05	9.86061e-06	3.13538e-06	1.73853e-05
1814	4.43984e-05	2.7956e-05	4.34186e-05	1.58659e-05	3.13538e-06	2.69549e-05
1815	4.46201e-05	2.82149e-05	4.38282e-05	1.60884e-05	3.13538e-06	2.71774e-05
1816	4.45646e-05	2.82796e-05	4.38737e-05	1.60884e-05	3.13538e-06	2.71883e-05
1817	4.44538e-05	2.82796e-05	4.39192e-05	1.60884e-05	3.13538e-06	2.71753e-05
1818	4.43429e-05	2.82149e-05	4.40102e-05	1.60884e-05	3.13538e-06	2.71584e-05
1819	4.27355e-05	2.65323e-05	4.23263e-05	1.51987e-05	2.35153e-06	2.58289e-05
1820	4.52298e-05	2.7503e-05	4.54666e-05	1.61625e-05	2.35153e-06	2.73427e-05
1821	4.46755e-05	2.72442e-05	4.51481e-05	1.60142e-05	2.35153e-06	2.70867e-05
1822	3.99641e-05	2.46557e-05	4.32365e-05	1.45314e-05	1.56769e-06	2.47911e-05
1823	5.33778e-05	4.33577e-05	6.09408e-05	2.89887e-05	5.48691e-06	3.84304e-05
1824	5.39875e-05	4.36813e-05	6.16235e-05	2.97301e-05	5.48691e-06	3.89019e-05
1825	5.47635e-05	4.43284e-05	6.25337e-05	3.06198e-05	5.48691e-06	3.95465e-05
1826	5.48189e-05	4.45873e-05	6.27613e-05	3.08422e-05	5.48691e-06	3.96993e-05
1827	5.48189e-05	4.43931e-05	6.27613e-05	3.09905e-05	5.48691e-06	3.96901e-05
1828	5.49298e-05	4.47167e-05	6.30343e-05	3.10646e-05	5.48691e-06	3.98465e-05
1829	5.48744e-05	4.47167e-05	6.31254e-05	3.09905e-05	5.48691e-06	3.98388e-05
1830	5.58721e-05	4.51697e-05	6.51734e-05	3.11388e-05	5.48691e-06	4.05682e-05
1831	5.58167e-05	4.51697e-05	6.52189e-05	3.10646e-05	5.48691e-06	4.05514e-05
1832	5.69252e-05	4.56227e-05	6.65843e-05	3.15095e-05	5.48691e-06	4.12257e-05
1833	5.70915e-05	4.57521e-05	6.67208e-05	3.15836e-05	5.48691e-06	4.1327e-05
1834	5.69252e-05	4.54932e-05	6.63567e-05	3.12129e-05	5.48691e-06	4.1095e-05
1835	5.65927e-05	4.52344e-05	6.60381e-05	3.08422e-05	5.48691e-06	4.08389e-05
1836	5.80338e-05	4.63345e-05	6.7449e-05	3.17319e-05	5.48691e-06	4.18072e-05
1837	5.82001e-05	4.65286e-05	6.75855e-05	3.17319e-05	5.48691e-06	4.19066e-05
1838	5.8311e-05	4.65934e-05	6.76311e-05	3.17319e-05	5.48691e-06	4.19509e-05
1839	5.83664e-05	4.65934e-05	6.754e-05	3.17319e-05	5.48691e-06	4.19437e-05
1840	5.82555e-05	4.65286e-05	6.754e-05	3.16577e-05	5.48691e-06	4.18937e-05
1841	5.8311e-05	4.65934e-05	6.77676e-05	3.16577e-05	5.48691e-06	4.19633e-05
1842	5.84772e-05	4.65934e-05	6.79496e-05	3.15095e-05	5.48691e-06	4.20033e-05
1843	5.83664e-05	4.63992e-05	6.78131e-05	3.14353e-05	5.48691e-06	4.19002e-05
1844	5.82001e-05	4.62698e-05	6.77221e-05	3.13612e-05	5.48691e-06	4.1808e-05
1845	5.80892e-05	4.62051e-05	6.754e-05	3.1287e-05	5.48691e-06	4.17216e-05
1846	5.77012e-05	4.56227e-05	6.72214e-05	3.06939e-05	4.70307e-06	4.11885e-05
1847	5.76458e-05	4.56227e-05	6.71759e-05	3.06939e-05	4.70307e-06	4.11683e-05
1848	5.54841e-05	4.30989e-05	6.3808e-05	2.70611e-05	4.70307e-06	3.8831e-05
1849	5.52624e-05	4.30341e-05	6.3808e-05	2.69869e-05	4.70307e-06	3.87589e-05
1850	5.35441e-05	4.07692e-05	6.06677e-05	2.47627e-05	4.70307e-06	3.68894e-05
1851	5.22138e-05	3.93455e-05	5.83011e-05	2.3873e-05	3.13538e-06	3.53738e-05
1852	1.0088e-05	3.75335e-06	5.91658e-06	2.52076e-06	1.56769e-06	4.76928e-06
1853	1.60189e-05	4.40048e-06	8.01014e-06	2.9656e-06	2.35153e-06	6.74933e-06
1854	1.61297e-05	4.4652e-06	8.01014e-06	2.9656e-06	2.35153e-06	6.78443e-06
1855	1.26932e-05	3.4945e-06	6.0076e-06	2.00178e-06	1.56769e-06	5.15295e-06
1856	2.5608e-05	7.11843e-06	1.45184e-05	3.78113e-06	1.56769e-06	1.05187e-05
1857	2.6772e-05	7.442e-06	1.54741e-05	4.00355e-06	1.56769e-06	1.10519e-05
1858	2.68275e-05	7.442e-06	1.52921e-05	3.92941e-06	1.56769e-06	1.10117e-05
1859	2.71046e-05	7.37728e-06	1.54741e-05	4.00355e-06	1.56769e-06	1.11054e-05
1860	2.72709e-05	7.50671e-06	1.56107e-05	4.07769e-06	1.56769e-06	1.12067e-05
1861	2.76589e-05	7.50671e-06	1.57472e-05	4.07769e-06	1.56769e-06	1.13116e-05
1862	2.78806e-05	7.37728e-06	1.59293e-05	4.30011e-06	1.56769e-06	1.1411e-05
1863	2.80469e-05	7.31257e-06	1.57017e-05	4.15183e-06	1.56769e-06	1.13561e-05
1864	2.80469e-05	7.11843e-06	1.56107e-05	4.30011e-06	2.35153e-06	1.14855e-05
1865	2.72709e-05	6.73015e-06	1.50645e-05	4.15183e-06	2.35153e-06	1.11138e-05
1866	2.74926e-05	6.14774e-06	1.44729e-05	3.92941e-06	2.35153e-06	1.08788e-05
1867	4.68926e-05	1.19719e-05	2.56233e-05	9.78647e-06	8.62229e-06	2.05793e-05
1868	4.76132e-05	1.20366e-05	2.58509e-05	9.86061e-06	8.62229e-06	2.07967e-05
1869	4.83892e-05	1.21013e-05	2.61695e-05	9.93475e-06	8.62229e-06	2.10434e-05
1870	4.85001e-05	1.21013e-05	2.61695e-05	1.00089e-05	8.62229e-06	2.10804e-05
1871	4.85001e-05	1.21013e-05	2.61695e-05	1.00089e-05	8.62229e-06	2.10804e-05
1872	4.73915e-05	1.15836e-05	2.49407e-05	9.63819e-06	8.62229e-06	2.04353e-05
1873	6.4907e-05	2.54969e-05	4.1234e-05	2.95077e-05	2.27315e-05	3.67754e-05
1874	6.51287e-05	2.54969e-05	4.16436e-05	2.95818e-05	2.27315e-05	3.69165e-05
1875	6.51841e-05	2.58205e-05	4.17802e-05	2.97301e-05	2.27315e-05	3.70493e-05
1876	6.52395e-05	2.58205e-05	4.18257e-05	2.97301e-05	2.27315e-05	3.70695e-05
1877	6.51287e-05	2.58205e-05	4.18257e-05	2.97301e-05	2.27315e-05	3.70473e-05
1878	6.35212e-05	2.44615e-05	3.95501e-05	2.93594e-05	2.27315e-05	3.59247e-05
1879	6.20247e-05	2.42027e-05	3.86398e-05	2.94335e-05	2.27315e-05	3.54064e-05
1880	6.24681e-05	2.42027e-05	3.86853e-05	2.9656e-05	2.27315e-05	3.55487e-05
1881	6.25235e-05	2.42027e-05	3.86398e-05	2.95077e-05	2.27315e-05	3.5521e-05
1882	5.77012e-05	2.31673e-05	3.56815e-05	2.92853e-05	2.27315e-05	3.37134e-05
1883	6.35212e-05	2.46557e-05	3.98686e-05	3.1287e-05	2.66507e-05	3.71966e-05
1884	6.32995e-05	2.45262e-05	3.97321e-05	3.1287e-05	2.66507e-05	3.70991e-05
1885	6.3355e-05	2.45262e-05	3.96866e-05	3.1287e-05	2.66507e-05	3.71011e-05
1886	5.69252e-05	2.21318e-05	3.40886e-05	2.97301e-05	2.42992e-05	3.3435e-05
1887	6.00847e-05	2.34908e-05	3.72745e-05	3.08422e-05	2.5083e-05	3.5355e-05
1888	6.00847e-05	2.35555e-05	3.73655e-05	3.07681e-05	2.5083e-05	3.53714e-05
1889	6.00847e-05	2.35555e-05	3.732e-05	3.06939e-05	2.5083e-05	3.53474e-05
1890	5.96967e-05	2.35555e-05	3.72745e-05	3.06198e-05	2.5083e-05	3.52459e-05
1891	5.9475e-05	2.35555e-05	3.72289e-05	3.04715e-05	2.5083e-05	3.51628e-05
1892	5.9475e-05	2.34908e-05	3.71834e-05	3.03974e-05	2.5083e-05	3.51259e-05
1893	5.17704e-05	1.92845e-05	3.20861e-05	2.543e-05	2.5083e-05	3.07308e-05
1894	4.08509e-05	1.51428e-05	2.6124e-05	1.98695e-05	2.27315e-05	2.49437e-05
1895	3.94098e-05	1.46899e-05	2.53503e-05	1.93505e-05	2.27315e-05	2.43064e-05
1896	2.06749e-05	5.17704e-06	1.25614e-05	6.74673e-06	7.0546e-06	1.04429e-05
1897	2.73263e-05	6.53601e-06	1.56562e-05	8.89679e-06	8.62229e-06	1.34075e-05
1898	2.71046e-05	6.40659e-06	1.53376e-05	8.30367e-06	8.62229e-06	1.3155e-05
1899	2.62732e-05	6.60073e-06	1.48825e-05	8.37781e-06	1.019e-05	1.32648e-05
1900	2.64949e-05	6.60073e-06	1.5019e-05	8.37781e-06	1.09738e-05	1.34932e-05
1901	2.64395e-05	6.66544e-06	1.53376e-05	8.22953e-06	1.09738e-05	1.35292e-05
1902	2.64949e-05	6.40659e-06	1.51555e-05	8.08125e-06	9.40614e-06	1.31089e-05
1903	2.00652e-05	5.11233e-06	1.08319e-05	6.07947e-06	5.48691e-06	9.51516e-06
1904	3.10401e-05	1.04835e-05	1.98433e-05	1.12693e-05	6.27076e-06	1.57814e-05
1905	3.12063e-05	1.06776e-05	2.00709e-05	1.13434e-05	6.27076e-06	1.59138e-05
1906	3.09292e-05	1.06129e-05	2.00709e-05	1.11951e-05	6.27076e-06	1.58158e-05
1907	3.12618e-05	1.11306e-05	2.08446e-05	1.14175e-05	6.27076e-06	1.61851e-05
1908	3.12063e-05	1.12601e-05	2.08446e-05	1.15658e-05	6.27076e-06	1.62295e-05
1909	3.09846e-05	1.09365e-05	2.0708e-05	1.13434e-05	6.27076e-06	1.60487e-05
1910	3.10401e-05	1.10012e-05	2.0708e-05	1.13434e-05	6.27076e-06	1.60727e-05
1911	3.05966e-05	1.08718e-05	2.0435e-05	1.11951e-05	6.27076e-06	1.58739e-05
1912	2.93218e-05	1.06776e-05	1.91606e-05	1.0602e-05	6.27076e-06	1.52066e-05
1913	2.60515e-05	9.90109e-06	1.79318e-05	1.0083e-05	5.48691e-06	1.38909e-05
1914	3.33126e-05	1.14542e-05	2.16183e-05	1.17882e-05	5.48691e-06	1.6732e-05
1915	3.35898e-05	1.14542e-05	2.17093e-05	1.17141e-05	5.48691e-06	1.67909e-05
1916	3.37006e-05	1.13895e-05	2.18003e-05	1.17141e-05	5.48691e-06	1.68183e-05
1917	3.24812e-05	1.09365e-05	2.06625e-05	1.08986e-05	4.70307e-06	1.59364e-05
1918	3.0264e-05	1.06129e-05	1.97523e-05	1.00089e-05	2.35153e-06	1.45979e-05
1919	3.76361e-05	1.35897e-05	2.39849e-05	1.49763e-05	3.13538e-06	1.86645e-05
1920	3.78578e-05	1.3525e-05	2.40759e-05	1.49021e-05	3.13538e-06	1.86992e-05
1921	3.87446e-05	1.40427e-05	2.444e-05	1.60884e-05	3.13538e-06	1.92902e-05
1922	4.02412e-05	1.46899e-05	2.6306e-05	1.77194e-05	3.91922e-06	2.05751e-05
1923	4.10172e-05	1.47546e-05	2.6397e-05	1.79419e-05	3.91922e-06	2.0806e-05
1924	4.07955e-05	1.45604e-05	2.58054e-05	1.74229e-05	3.91922e-06	2.05007e-05
1925	4.04629e-05	1.41074e-05	2.53958e-05	1.73487e-05	3.91922e-06	2.02468e-05
1926	4.05184e-05	1.41074e-05	2.53503e-05	1.72746e-05	3.91922e-06	2.0234e-05
1927	4.00749e-05	1.3978e-05	2.47586e-05	1.68298e-05	3.91922e-06	1.99121e-05
1928	3.76361e-05	1.26837e-05	2.21644e-05	1.47538e-05	2.35153e-06	1.79179e-05
1929	3.79132e-05	1.27485e-05	2.22099e-05	1.47538e-05	2.35153e-06	1.79954e-05
1930	3.78578e-05	1.2619e-05	2.18458e-05	1.46797e-05	2.35153e-06	1.78708e-05
1931	3.69155e-05	1.08718e-05	1.99343e-05	1.379e-05	2.35153e-06	1.67726e-05
1932	3.69155e-05	1.08071e-05	1.99343e-05	1.37159e-05	2.35153e-06	1.67449e-05
1933	3.69155e-05	1.08071e-05	1.98888e-05	1.37159e-05	2.35153e-06	1.67358e-05
1934	3.41441e-05	9.64224e-06	1.70215e-05	1.26779e-05	2.35153e-06	1.51675e-05
1935	3.20378e-05	9.12453e-06	1.58837e-05	1.26038e-05	2.35153e-06	1.44003e-05
1936	2.9876e-05	8.73626e-06	1.52011e-05	1.22331e-05	2.35153e-06	1.36796e-05
1937	2.8712e-05	8.41269e-06	1.46549e-05	1.19365e-05	2.35153e-06	1.32135e-05
1938	2.54972e-05	6.989e-06	1.19242e-05	1.04537e-05	1.56769e-06	1.12864e-05
1939	2.23378e-05	5.56532e-06	9.55755e-06	8.74851e-06	1.56769e-06	9.55537e-06
1940	2.18943e-05	5.50061e-06	9.23897e-06	8.37781e-06	1.56769e-06	9.31588e-06
1941	1.55755e-05	3.17094e-06	5.50697e-06	5.18979e-06	1.56769e-06	6.20218e-06
1942	7.1503e-06	1.55311e-06	1.866e-06	1.8535e-06	7.83845e-07	2.64135e-06
1943	7.20573e-06	1.55311e-06	1.91151e-06	1.77936e-06	0	2.48994e-06
1944	2.10629e-06	7.11843e-07	6.82682e-07	4.44839e-07	0	7.89131e-07
1945	3.43658e-06	9.70695e-07	1.36536e-06	1.03796e-06	0	1.36212e-06
1946	4.71144e-06	1.42369e-06	1.95702e-06	1.55694e-06	0	1.92982e-06
1947	4.15715e-06	1.16483e-06	1.72946e-06	1.4828e-06	0	1.70685e-06
1948	1.20834e-05	2.91209e-06	3.82302e-06	3.41044e-06	1.56769e-06	4.75933e-06
1949	1.23606e-05	2.84737e-06	3.95956e-06	3.48458e-06	1.56769e-06	4.84396e-06
1950	1.24714e-05	2.84737e-06	3.95956e-06	3.48458e-06	1.56769e-06	4.86612e-06
1951	1.24714e-05	2.84737e-06	3.95956e-06	3.48458e-06	1.56769e-06	4.86612e-06
1952	1.26932e-05	2.91209e-06	3.95956e-06	3.55872e-06	1.56769e-06	4.93825e-06
1953	1.26932e-05	2.9768e-06	3.91404e-06	3.55872e-06	1.56769e-06	4.94209e-06
1954	2.20606e-05	1.07424e-05	1.43818e-05	1.09727e-05	3.13538e-06	1.22586e-05
1955	2.23932e-05	1.08071e-05	1.45639e-05	1.1121e-05	3.13538e-06	1.24041e-05
1956	2.26703e-05	1.11306e-05	1.47004e-05	1.1121e-05	3.13538e-06	1.25515e-05
1957	2.27812e-05	1.11953e-05	1.48825e-05	1.12693e-05	3.13538e-06	1.26527e-05
1958	2.27812e-05	1.12601e-05	1.48825e-05	1.12693e-05	3.13538e-06	1.26657e-05
1959	2.27812e-05	1.12601e-05	1.48825e-05	1.12693e-05	3.13538e-06	1.26657e-05
1960	2.27812e-05	1.12601e-05	1.48825e-05	1.12693e-05	3.13538e-06	1.26657e-05
1961	2.24486e-05	1.12601e-05	1.4837e-05	1.12693e-05	3.13538e-06	1.25901e-05
1962	2.26149e-05	1.12601e-05	1.4928e-05	1.12693e-05	3.13538e-06	1.26415e-05
1963	2.26149e-05	1.12601e-05	1.4928e-05	1.12693e-05	3.13538e-06	1.26415e-05
1964	2.25595e-05	1.11306e-05	1.4837e-05	1.1121e-05	3.13538e-06	1.25567e-05
1965	2.07857e-05	1.06129e-05	1.39267e-05	1.02313e-05	3.13538e-06	1.17384e-05
1966	2.41669e-05	1.12601e-05	1.53831e-05	1.07503e-05	3.13538e-06	1.29392e-05
1967	2.43886e-05	1.13248e-05	1.53831e-05	1.06761e-05	3.13538e-06	1.29816e-05
1968	2.43886e-05	1.13248e-05	1.53831e-05	1.06761e-05	3.13538e-06	1.29816e-05
1969	2.43332e-05	1.13248e-05	1.53831e-05	1.06761e-05	3.13538e-06	1.29705e-05
1970	2.42223e-05	1.13248e-05	1.53831e-05	1.06761e-05	3.13538e-06	1.29483e-05
1971	2.38898e-05	1.13248e-05	1.53376e-05	1.03796e-05	3.13538e-06	1.28134e-05
1972	2.38898e-05	1.13248e-05	1.53831e-05	1.03796e-05	3.13538e-06	1.28225e-05
1973	2.38343e-05	1.10659e-05	1.52466e-05	9.86061e-06	3.13538e-06	1.26286e-05
1974	2.24486e-05	9.31867e-06	1.33351e-05	8.45195e-06	3.13538e-06	1.13379e-05
1975	2.00652e-05	7.9597e-06	1.1105e-05	6.67259e-06	3.13538e-06	9.78757e-06
1976	1.7848e-05	6.73015e-06	9.55755e-06	5.85705e-06	3.13538e-06	8.62563e-06
1977	8.48059e-06	2.0061e-06	2.68522e-06	1.03796e-06	1.56769e-06	3.15551e-06
1978	9.25659e-06	2.07082e-06	2.73073e-06	1.77936e-06	7.83845e-07	3.32427e-06
1979	8.97944e-06	2.0061e-06	2.6397e-06	1.70522e-06	7.83845e-07	3.22286e-06
1980	6.59601e-06	1.4884e-06	2.27561e-06	1.4828e-06	7.83845e-07	2.52533e-06
1981	8.81316e-06	1.94139e-06	3.14034e-06	1.55694e-06	1.56769e-06	3.4039e-06
1982	8.81316e-06	1.94139e-06	3.14034e-06	1.55694e-06	1.56769e-06	3.4039e-06
1983	8.36973e-06	1.87668e-06	2.91278e-06	1.55694e-06	1.56769e-06	3.25676e-06
1984	1.06423e-05	2.13553e-06	3.77751e-06	2.37248e-06	1.56769e-06	4.0991e-06
1985	1.06977e-05	2.13553e-06	3.77751e-06	2.37248e-06	1.56769e-06	4.11018e-06
1986	9.14573e-06	1.74725e-06	3.0038e-06	2.15006e-06	1.56769e-06	3.52291e-06
1987	1.26377e-05	2.71795e-06	5.14287e-06	3.26216e-06	1.56769e-06	5.06567e-06
1988	1.26932e-05	2.78266e-06	5.14287e-06	3.26216e-06	1.56769e-06	5.08972e-06
1989	1.26377e-05	2.71795e-06	5.09736e-06	3.26216e-06	1.56769e-06	5.05657e-06
1990	1.26377e-05	2.71795e-06	5.09736e-06	3.26216e-06	1.56769e-06	5.05657e-06
1991	1.25823e-05	2.71795e-06	5.09736e-06	3.26216e-06	1.56769e-06	5.04549e-06
1992	1.15846e-05	2.71795e-06	4.77878e-06	3.11388e-06	1.56769e-06	4.75258e-06
1993	1.30812e-05	3.17094e-06	5.96209e-06	3.78113e-06	1.56769e-06	5.51261e-06
1994	1.30257e-05	3.17094e-06	6.0076e-06	3.78113e-06	1.56769e-06	5.51061e-06
1995	1.30812e-05	3.17094e-06	6.0076e-06	3.78113e-06	1.56769e-06	5.52171e-06
1996	1.2416e-05	2.91209e-06	5.64351e-06	3.63286e-06	1.56769e-06	5.23443e-06
1997	1.29703e-05	3.17094e-06	6.0076e-06	3.85527e-06	1.56769e-06	5.51436e-06
1998	1.31366e-05	3.17094e-06	6.0076e-06	3.92941e-06	1.56769e-06	5.56245e-06
1999	1.19726e-05	2.91209e-06	5.78004e-06	3.55872e-06	1.56769e-06	5.15823e-06
[truncated: 7,180 more rows]

## Sheet: CANC_dZF1
bp	CLIP28_density	CLIP51_density	average
1	3.16188e-05	0	1.58094e-05
2	9.48563e-05	5.1369e-06	4.99966e-05
3	0.000103861	5.1369e-06	5.4499e-05
4	0.000144587	7.7054e-06	7.61461e-05
5	0.000160959	7.7054e-06	8.43322e-05
6	0.000171192	8.9896e-06	9.00906e-05
7	0.000177126	8.9896e-06	9.3058e-05
8	0.000199945	8.9896e-06	0.000104467
9	0.000230643	8.9896e-06	0.000119816
10	0.000267378	8.9896e-06	0.000138184
11	0.000275052	8.9896e-06	0.000142021
12	0.000275973	8.9896e-06	0.000142482
13	0.000278941	8.9896e-06	0.000143965
14	0.000375127	3.0822e-05	0.000202975
15	0.000380039	3.0822e-05	0.00020543
16	0.000383723	3.2106e-05	0.000207914
17	0.000386076	3.2106e-05	0.000209091
18	0.000387611	3.2106e-05	0.000209859
19	0.000441946	6.2927e-05	0.000252437
20	0.000444607	6.5496e-05	0.000255051
21	0.000449825	6.5496e-05	0.000257661
22	0.000445323	6.678e-05	0.000256052
23	0.000647826	0.00010916	0.000378493
24	0.000971995	0.00014255	0.000557273
25	0.00100965	0.00013998	0.000574816
26	0.00103053	0.00013998	0.000585254
27	0.00104444	0.00013998	0.000592212
28	0.00104741	0.00013998	0.000593696
29	0.00104168	0.0001387	0.000590188
30	0.000916535	0.0001387	0.000527616
31	0.00148158	0.00015411	0.000817844
32	0.0015925	0.00015539	0.000873947
33	0.00163691	0.00015668	0.000896793
34	0.00166648	0.00015668	0.00091158
35	0.00167856	0.00015668	0.000917617
36	0.00167999	0.00014897	0.00091448
37	0.00174282	0.00015026	0.000946537
38	0.00184678	0.00016567	0.00100622
39	0.00189467	0.00018108	0.00103787
40	0.00190695	0.00018236	0.00104466
41	0.00190275	0.00018365	0.0010432
42	0.00190644	0.00018365	0.00104504
43	0.0019049	0.00018365	0.00104427
44	0.00188127	0.00017594	0.0010286
45	0.00178661	0.0001464	0.000966508
46	0.00180872	0.0001464	0.000977559
47	0.00181291	0.0001464	0.000979657
48	0.00179705	0.00013484	0.000965948
49	0.00178098	0.00013356	0.000957273
50	0.00181792	0.00013484	0.000976385
51	0.00179101	0.00013356	0.000962287
52	0.00178999	0.00013356	0.000961775
53	0.00177853	0.00013356	0.000956045
54	0.00176482	0.00013228	0.000948547
55	0.00175694	0.00013228	0.000944607
56	0.00162033	0.00010788	0.000864105
57	0.00143144	8.0907e-05	0.000756173
58	0.000964628	5.0085e-05	0.000507357
59	0.000937	5.0085e-05	0.000493543
60	0.000619277	2.9537e-05	0.000324407
61	0.000398765	2.5685e-05	0.000212225
62	0.000384848	2.44e-05	0.000204624
63	0.000344225	2.1832e-05	0.000183028
64	0.000331536	1.7979e-05	0.000174758
65	0.000287843	1.6695e-05	0.000152269
66	0.000289173	1.7979e-05	0.000153576
67	0.000288969	1.7979e-05	0.000153474
68	0.000287741	1.7979e-05	0.00015286
69	0.000232689	3.8527e-06	0.000118271
70	0.000227062	3.8527e-06	0.000115457
71	0.00021601	2.5685e-06	0.000109289
72	0.00016935	1.2842e-06	8.53169e-05
73	0.000167508	3.8527e-06	8.56802e-05
74	0.00017068	5.1369e-06	8.79084e-05
75	7.01957e-05	6.4212e-06	3.83084e-05
76	0.000191759	7.9623e-05	0.000135691
77	0.000189713	8.0907e-05	0.00013531
78	0.00018961	8.0907e-05	0.000135258
79	0.000188792	8.0907e-05	0.000134849
80	0.000171805	8.0907e-05	0.000126356
81	0.000171601	8.2191e-05	0.000126896
82	0.000170987	8.6044e-05	0.000128515
83	0.000175182	8.8612e-05	0.000131897
84	0.000173545	9.1181e-05	0.000132363
85	0.000198513	0.0001387	0.000168605
86	0.000208438	0.00014127	0.000174852
87	0.000212429	0.00014127	0.000176847
88	0.000234429	0.00014769	0.000191058
89	0.000236066	0.00014769	0.000191877
90	0.000236271	0.00014897	0.000192621
91	0.000232383	0.00014769	0.000190035
92	0.00023668	0.00014897	0.000192826
93	0.000235248	0.00014897	0.000192109
94	0.000228903	0.0001464	0.000187653
95	0.000189508	0.00014512	0.000167313
96	0.000226652	0.00017337	0.000200012
97	0.000245787	0.00017594	0.000210864
98	0.000246606	0.00017594	0.000211273
99	0.00024415	0.00017722	0.000210687
100	0.000224299	0.0001708	0.000197551
101	0.00047817	0.00041224	0.000445205
102	0.000486458	0.00042123	0.000453844
103	0.000503649	0.00043921	0.000471429
104	0.000642403	0.00056121	0.000601807
105	0.000656524	0.00057277	0.000614646
106	0.000733473	0.00063056	0.000682016
107	0.00073552	0.00063184	0.000683682
108	0.000764273	0.0006434	0.000703837
109	0.000763455	0.0006434	0.000703428
110	0.000776962	0.00066523	0.000721098
111	0.000803669	0.00067165	0.000737662
112	0.000812469	0.00067165	0.000742062
113	0.000801111	0.00067165	0.000736383
114	0.000802134	0.00067165	0.000736894
115	0.000795381	0.00067294	0.00073416
116	0.000804181	0.00067294	0.00073856
117	0.000790776	0.00066523	0.000728005
118	0.000784227	0.00066395	0.000724088
119	0.000806943	0.00066652	0.000736731
120	0.000750971	0.00062927	0.000690123
121	0.000781874	0.0006357	0.000708785
122	0.000754552	0.000619	0.000686777
123	0.00077645	0.00062285	0.000699652
124	0.000777883	0.00062285	0.000700368
125	0.000752404	0.00062029	0.000686344
126	0.000693668	0.00058176	0.000637713
127	0.000657036	0.00055351	0.00060527
128	0.000601268	0.00052268	0.000561976
129	0.000602496	0.00052011	0.000561305
130	0.000591854	0.00051113	0.00055149
131	0.000326523	0.00017851	0.000252516
132	0.000370011	0.00018621	0.000278113
133	0.000376253	0.00018621	0.000281233
134	0.000339927	0.00014127	0.000240597
135	0.000297769	7.7054e-05	0.000187411
136	0.000318643	7.9623e-05	0.000199133
137	0.000298281	7.3201e-05	0.000185741
138	0.000298383	7.3201e-05	0.000185792
139	0.000298178	7.3201e-05	0.00018569
140	0.000297974	7.3201e-05	0.000185587
141	0.000293471	6.8064e-05	0.000180768
142	0.000282011	6.8064e-05	0.000175038
143	0.000268606	6.8064e-05	0.000168335
144	0.00025868	6.8064e-05	0.000163372
145	0.000236578	5.1369e-05	0.000143974
146	0.000184903	3.7243e-05	0.000111073
147	0.000191145	4.1096e-05	0.00011612
148	0.000190429	4.1096e-05	0.000115762
149	0.000189201	4.1096e-05	0.000115148
150	0.000165052	3.7243e-05	0.000101147
151	0.000120438	2.8253e-05	7.43455e-05
152	9.34237e-05	2.5685e-05	5.95542e-05
153	8.75911e-05	3.4674e-05	6.11327e-05
154	9.01493e-05	4.6232e-05	6.81909e-05
155	8.58516e-05	5.6506e-05	7.11789e-05
156	6.56933e-05	5.6506e-05	6.10998e-05
157	0.000125861	9.2465e-05	0.000109163
158	0.000128829	9.2465e-05	0.000110647
159	0.000127703	9.2465e-05	0.000110084
160	0.000128726	9.5033e-05	0.00011188
161	0.00016188	0.00012457	0.000143225
162	0.000163722	0.00012457	0.000144146
163	0.000170578	0.00012842	0.000149501
164	0.000184085	0.00013741	0.000160749
165	0.000187564	0.00013998	0.000163773
166	0.000204652	0.00015411	0.00017938
167	0.000208131	0.00015668	0.000182404
168	0.000209973	0.00015925	0.000184609
169	0.000210075	0.00015925	0.00018466
170	0.000210178	0.00015925	0.000184711
171	0.000210178	0.00015796	0.000184069
172	0.000206596	0.00015668	0.000181636
173	0.000207824	0.00015668	0.00018225
174	0.000207313	0.00015668	0.000181995
175	0.000206289	0.00015668	0.000181483
176	0.000189508	0.00014383	0.000166671
177	0.000192373	0.0001464	0.000169388
178	0.000190531	0.00014512	0.000167825
179	0.000141415	8.9896e-05	0.000115656
180	0.000157889	9.5033e-05	0.000126461
181	0.000162187	9.5033e-05	0.00012861
182	0.000159424	9.2465e-05	0.000125944
183	0.000161164	9.1181e-05	0.000126172
184	0.000158503	9.1181e-05	0.000124842
185	0.000152875	8.7328e-05	0.000120102
186	0.000152159	8.7328e-05	0.000119743
187	0.00014295	7.8338e-05	0.000110644
188	0.000127294	7.0633e-05	9.89633e-05
189	0.000103554	6.0359e-05	8.19565e-05
190	0.000107749	6.2927e-05	8.53384e-05
191	0.000106726	6.2927e-05	8.48268e-05
192	0.00010427	6.2927e-05	8.35989e-05
193	5.08561e-05	2.6969e-05	3.89125e-05
194	0.000212736	0.00013484	0.00017379
195	0.000214885	0.00013998	0.000177433
196	0.000215396	0.00013998	0.000177689
197	0.000217238	0.00013998	0.00017861
198	0.000217136	0.00015026	0.000183696
199	0.000215806	0.00015026	0.000183031
200	0.000213657	0.00015154	0.000182598
201	0.000211815	0.00015796	0.000184888
202	0.000270039	0.00021447	0.000242253
203	0.000280476	0.00022089	0.000250682
204	0.000278736	0.00021832	0.000248528
205	0.000280476	0.00021832	0.000249398
206	0.000279555	0.00021575	0.000247653
207	0.000268708	0.00021061	0.000239661
208	0.000387509	0.00029024	0.000338873
209	0.000409509	0.00029794	0.000353726
210	0.000415342	0.00029409	0.000354716
211	0.000421788	0.00030051	0.000361149
212	0.000450951	0.00031207	0.00038151
213	0.000411351	0.00026455	0.000337952
214	0.000600756	0.0003827	0.000491729
215	0.000610784	0.00038142	0.000496101
216	0.000616617	0.00038142	0.000499017
217	0.000622961	0.00038013	0.000501547
218	0.000605668	0.00036986	0.000487764
219	0.000591342	0.00036087	0.000476106
220	0.000698375	0.00048287	0.000590624
221	0.000699603	0.00048929	0.000594448
222	0.00070298	0.00049186	0.000597421
223	0.000703492	0.00049443	0.000598961
224	0.000682106	0.00049315	0.000587626
225	0.000682617	0.00049443	0.000588524
226	0.000682208	0.000497	0.000589603
227	0.000682515	0.00049443	0.000588473
228	0.000648543	0.00049315	0.000570844
229	0.000654171	0.00053938	0.000596775
230	0.000656626	0.00056506	0.000610845
231	0.000675557	0.00062414	0.000649847
232	0.000660924	0.00062157	0.000641247
233	0.000637491	0.00061258	0.000625036
234	0.000677706	0.00062029	0.000648995
235	0.000670236	0.00061643	0.000643334
236	0.000588375	0.0005702	0.000579288
237	0.000607715	0.0005702	0.000588957
238	0.000543249	0.00054066	0.000541956
239	0.000685175	0.00057277	0.000628972
240	0.000687017	0.00057277	0.000629893
241	0.000686301	0.00057148	0.000628893
242	0.000686199	0.00057148	0.000628842
243	0.000667575	0.00056763	0.000617603
244	0.000648543	0.00053167	0.000590108
245	0.000642096	0.00051241	0.000577253
246	0.000648133	0.00051241	0.000580271
247	0.000648031	0.00051241	0.00058022
248	0.000642096	0.00050727	0.000574684
249	0.000634626	0.0005047	0.000569665
250	0.000624189	0.00049058	0.000557383
251	0.000622552	0.00048929	0.000555923
252	0.000595742	0.00046618	0.00053096
253	0.000562589	0.00043536	0.000498972
254	0.000562077	0.0004315	0.00049679
255	0.000522886	0.00040325	0.000463068
256	0.00052217	0.00040325	0.00046271
257	0.000500681	0.00039298	0.000446829
258	0.000300327	0.00015796	0.000229144
259	0.000298076	0.00015796	0.000228018
260	0.000230029	0.00010017	0.0001651
261	0.000241694	0.00011173	0.000176711
262	0.000190838	9.1181e-05	0.000141009
263	0.000232076	0.0001464	0.000189239
264	0.000216113	0.00013356	0.000174837
265	0.00023361	0.00014383	0.000188722
266	0.000233303	0.00014383	0.000188569
267	0.00019882	0.00013484	0.000166832
268	0.000320792	0.00026969	0.000295241
269	0.000326318	0.00027483	0.000300572
270	0.000321304	0.00027354	0.000297423
271	0.000324067	0.00027996	0.000302015
272	0.000323043	0.00027611	0.000299577
273	0.000322225	0.00027611	0.000299168
274	0.000311685	0.00027483	0.000293256
275	0.000333174	0.00028767	0.000310421
276	0.000336448	0.00028767	0.000312058
277	0.000335118	0.00028767	0.000311393
278	0.000335118	0.00028767	0.000311393
279	0.000335016	0.00028767	0.000311342
280	0.000334299	0.00028767	0.000310984
281	0.000328364	0.00028382	0.00030609
282	0.00032816	0.00028382	0.000305988
283	0.000323146	0.00028253	0.000302839
284	0.000312299	0.00026969	0.000290994
285	0.000315062	0.00028767	0.000301365
286	0.00031496	0.00028767	0.000301314
287	0.000299611	0.0002851	0.000292355
288	0.000278634	0.00027868	0.000278656
289	0.00028375	0.00027868	0.000281215
290	0.000275257	0.00027483	0.000275042
291	0.000224708	0.00022731	0.000226009
292	0.000261034	0.00025171	0.000256372
293	0.000260318	0.00025043	0.000255372
294	0.000254178	0.00024657	0.000250375
295	0.000174261	0.00013228	0.000153269
296	0.000264206	0.00029537	0.00027979
297	0.00025909	0.00028638	0.000272737
298	0.000269322	0.00029923	0.000284274
299	0.00026789	0.00029152	0.000279705
300	0.000262773	0.00028767	0.000275221
301	0.000545296	0.0009285	0.000736899
302	0.00065591	0.00119177	0.00092384
303	0.000686199	0.00124057	0.000963385
304	0.000698273	0.00124828	0.000973275
305	0.000706869	0.00124699	0.00097693
306	0.000701445	0.00124442	0.000972934
307	0.000740534	0.00128038	0.00101046
308	0.00078566	0.00132661	0.00105614
309	0.000817278	0.00133946	0.00107837
310	0.00096606	0.00156548	0.00126577
311	0.000985502	0.00159245	0.00128898
312	0.000986833	0.00159887	0.00129285
313	0.000986526	0.00160144	0.00129398
314	0.00107944	0.00173757	0.0014085
315	0.00108169	0.00173757	0.00140963
316	0.00108087	0.00174271	0.00141179
317	0.00111382	0.00176839	0.00144111
318	0.00111382	0.00176711	0.00144046
319	0.00111679	0.00176711	0.00144195
320	0.0011172	0.00176711	0.00144215
321	0.00111801	0.00176711	0.00144256
322	0.00111535	0.00176197	0.00143866
323	0.0010821	0.00173115	0.00140662
324	0.00114503	0.00180307	0.00147405
325	0.0011483	0.00180307	0.00147568
326	0.00115096	0.00180949	0.00148022
327	0.00115147	0.00181077	0.00148112
328	0.00115199	0.00181077	0.00148138
329	0.00114677	0.00180435	0.00147556
330	0.00114912	0.00180692	0.00147802
331	0.00112037	0.00177481	0.00144759
332	0.00112098	0.0017761	0.00144854
333	0.00105549	0.00169647	0.00137598
334	0.0010556	0.00169647	0.00137604
335	0.00105314	0.00169519	0.00137416
336	0.00105007	0.00169391	0.00137199
337	0.000987958	0.00163226	0.00131011
338	0.000985093	0.00163483	0.00130996
339	0.000984786	0.00163483	0.00130981
340	0.000976293	0.00161685	0.00129657
341	0.000936795	0.0015719	0.00125435
342	0.000927484	0.00157447	0.00125098
343	0.000814106	0.00146146	0.00113778
344	0.000785762	0.00141394	0.00109985
345	0.000786069	0.00141394	0.00110001
346	0.000725799	0.00129066	0.00100823
347	0.000725083	0.00129066	0.00100787
348	0.000704617	0.00126112	0.000982868
349	0.00050283	0.00089383	0.000698329
350	0.000499863	0.00088997	0.000694919
351	0.000429053	0.00077953	0.000604292
352	0.00033829	0.00065368	0.000495983
353	0.000336039	0.00065368	0.000494857
354	0.000325192	0.0006434	0.000484297
355	6.40561e-05	0.00014769	0.000105872
356	6.79445e-05	0.00017337	0.000120658
357	6.57957e-05	0.00017209	0.000118942
358	3.87816e-05	0.00010017	6.94759e-05
359	5.24933e-05	0.00012329	8.78899e-05
360	5.30049e-05	0.00012329	8.81457e-05
361	5.29026e-05	0.00012329	8.80945e-05
362	5.04468e-05	0.000122	8.62245e-05
363	5.48468e-05	0.000122	8.84245e-05
364	5.49491e-05	0.000122	8.84757e-05
365	5.49491e-05	0.000122	8.84757e-05
366	5.49491e-05	0.000122	8.84757e-05
367	5.35165e-05	0.000122	8.77594e-05
368	5.35165e-05	0.000122	8.77594e-05
369	5.34142e-05	0.000122	8.77082e-05
370	5.33119e-05	0.000122	8.76571e-05
371	5.32096e-05	0.000122	8.76059e-05
372	5.08561e-05	0.000122	8.64292e-05
373	3.53025e-05	9.3749e-05	6.45258e-05
374	4.36932e-05	9.6318e-05	7.00054e-05
375	4.36932e-05	9.6318e-05	7.00054e-05
376	4.46142e-05	9.6318e-05	7.04659e-05
377	4.07258e-05	8.8612e-05	6.4669e-05
378	9.47539e-05	0.00010659	0.000100673
379	0.000100382	0.00010659	0.000103487
380	0.000102633	0.00010659	0.000104612
381	0.000103861	0.00010659	0.000105226
382	0.000126066	0.00011301	0.000119539
383	0.00012934	0.00011301	0.000121176
384	0.000130568	0.00011044	0.000120506
385	0.000131591	0.00011044	0.000121018
386	0.000131796	0.00011044	0.00012112
387	0.000131489	0.00010916	0.000120324
388	0.000131591	0.00010916	0.000120376
389	0.00013108	0.00010788	0.000119478
390	0.000131387	0.00010788	0.000119631
391	0.000130773	0.00010659	0.000118682
392	0.000129442	9.7602e-05	0.000113522
393	0.000132615	8.6044e-05	0.000109329
394	0.000150112	8.6044e-05	0.000118078
395	0.000161982	8.7328e-05	0.000124655
396	0.000164438	8.6044e-05	0.000125241
397	0.000156047	7.3201e-05	0.000114624
398	0.000159731	7.4486e-05	0.000117108
399	0.000159629	7.4486e-05	0.000117057
400	0.000159731	7.4486e-05	0.000117108
401	0.000159322	7.4486e-05	0.000116904
402	0.000153591	7.3201e-05	0.000113396
403	0.000142029	6.1643e-05	0.000101836
404	0.000142336	6.1643e-05	0.000101989
405	0.000142336	6.1643e-05	0.000101989
406	0.000142336	6.1643e-05	0.000101989
407	0.000141108	6.1643e-05	0.000101375
408	0.000141005	6.1643e-05	0.000101324
409	0.000140801	6.1643e-05	0.000101222
410	0.000140698	6.1643e-05	0.000101171
411	0.000136912	4.7517e-05	9.22145e-05
412	0.000136912	4.7517e-05	9.22145e-05
413	0.000132615	4.7517e-05	9.00656e-05
414	0.000131591	4.3664e-05	8.76277e-05
415	0.000122996	4.3664e-05	8.333e-05
416	0.000115628	4.3664e-05	7.96462e-05
417	5.32096e-06	3.8527e-06	4.58683e-06
418	5.32096e-06	2.5685e-06	3.94471e-06
419	4.91165e-06	2.5685e-06	3.74006e-06
420	3.06978e-06	2.5685e-06	2.81913e-06
421	3.17211e-06	2.5685e-06	2.87029e-06
422	2.45583e-06	2.5685e-06	2.51215e-06
423	3.17211e-06	1.2842e-06	2.22817e-06
424	3.37676e-06	1.2842e-06	2.3305e-06
425	3.17211e-06	1.2842e-06	2.22817e-06
426	2.96746e-06	1.2842e-06	2.12585e-06
427	2.04652e-06	1.2842e-06	1.66538e-06
428	2.7628e-06	5.1369e-06	3.94987e-06
429	2.86513e-06	5.1369e-06	4.00103e-06
430	2.96746e-06	5.1369e-06	4.0522e-06
431	2.7628e-06	5.1369e-06	3.94987e-06
432	2.14885e-06	5.1369e-06	3.64289e-06
433	3.17211e-06	5.1369e-06	4.15452e-06
434	3.17211e-06	5.1369e-06	4.15452e-06
435	5.1163e-06	8.9896e-06	7.05297e-06
436	5.32096e-06	8.9896e-06	7.1553e-06
437	2.03629e-05	1.5411e-05	1.78869e-05
438	2.14885e-05	1.5411e-05	1.84496e-05
439	2.14885e-05	1.5411e-05	1.84496e-05
440	4.72746e-05	5.9075e-05	5.31747e-05
441	4.96281e-05	6.0359e-05	5.49936e-05
442	5.98608e-05	6.5496e-05	6.26784e-05
443	6.0884e-05	6.5496e-05	6.319e-05
444	6.09863e-05	6.5496e-05	6.32412e-05
445	6.1191e-05	6.5496e-05	6.33435e-05
446	6.89678e-05	7.1917e-05	7.04425e-05
447	6.91724e-05	7.1917e-05	7.05448e-05
448	6.90701e-05	7.1917e-05	7.04936e-05
449	6.92748e-05	7.1917e-05	7.05959e-05
450	9.22981e-05	8.9896e-05	9.10973e-05
451	9.26051e-05	8.9896e-05	9.12508e-05
452	9.31167e-05	8.9896e-05	9.15066e-05
453	9.31167e-05	8.9896e-05	9.15066e-05
454	9.32191e-05	8.9896e-05	9.15577e-05
455	9.32191e-05	8.9896e-05	9.15577e-05
456	8.80004e-05	8.8612e-05	8.83063e-05
457	8.11446e-05	8.3475e-05	8.23099e-05
458	9.17865e-05	9.1181e-05	9.14836e-05
459	9.17865e-05	8.9896e-05	9.08415e-05
460	9.12749e-05	8.9896e-05	9.05856e-05
461	8.98423e-05	8.9896e-05	8.98694e-05
462	6.73306e-05	7.3201e-05	7.0266e-05
463	7.21399e-05	7.577e-05	7.39549e-05
464	7.20376e-05	7.577e-05	7.39037e-05
465	7.13213e-05	7.577e-05	7.35456e-05
466	6.87631e-05	7.1917e-05	7.03401e-05
467	6.61026e-05	6.8064e-05	6.70835e-05
468	6.64096e-05	6.8064e-05	6.7237e-05
469	4.36932e-05	4.238e-05	4.30365e-05
470	4.78886e-05	5.6506e-05	5.21975e-05
471	4.80933e-05	5.6506e-05	5.22998e-05
472	4.68653e-05	5.5222e-05	5.10437e-05
473	3.12095e-05	2.5685e-05	2.84471e-05
474	4.52281e-05	4.1096e-05	4.31618e-05
475	4.55351e-05	4.1096e-05	4.33153e-05
476	4.49211e-05	4.1096e-05	4.30083e-05
477	4.40002e-05	4.1096e-05	4.25479e-05
478	4.38979e-05	4.1096e-05	4.24967e-05
479	4.36932e-05	4.1096e-05	4.23944e-05
480	4.36932e-05	4.1096e-05	4.23944e-05
481	4.34886e-05	4.1096e-05	4.2292e-05
482	4.07258e-05	3.8527e-05	3.96264e-05
483	4.01118e-05	3.8527e-05	3.93194e-05
484	3.91909e-05	3.8527e-05	3.8859e-05
485	3.7349e-05	3.8527e-05	3.7938e-05
486	3.50978e-05	3.7243e-05	3.61703e-05
487	2.7628e-05	3.2106e-05	2.9867e-05
488	3.24374e-05	3.8527e-05	3.54822e-05
489	3.17211e-05	3.8527e-05	3.51241e-05
490	3.19257e-05	3.9811e-05	3.58685e-05
491	3.17211e-05	3.9811e-05	3.57662e-05
492	3.11071e-05	3.9811e-05	3.54592e-05
493	1.10512e-05	1.9264e-05	1.51574e-05
494	1.13582e-05	1.9264e-05	1.53109e-05
495	1.14605e-05	1.9264e-05	1.5362e-05
496	1.08466e-05	1.7979e-05	1.44129e-05
497	2.58885e-05	5.7791e-05	4.18395e-05
498	2.60931e-05	5.9075e-05	4.2584e-05
499	2.77304e-05	6.4212e-05	4.5971e-05
500	2.77304e-05	6.4212e-05	4.5971e-05
501	2.77304e-05	6.4212e-05	4.5971e-05
502	2.77304e-05	6.4212e-05	4.5971e-05
503	2.75257e-05	6.4212e-05	4.58687e-05
504	2.73211e-05	6.4212e-05	4.57664e-05
505	2.69118e-05	6.4212e-05	4.55617e-05
506	2.49676e-05	6.4212e-05	4.45896e-05
507	2.53769e-05	6.4212e-05	4.47943e-05
508	2.53769e-05	6.4212e-05	4.47943e-05
509	2.52745e-05	6.4212e-05	4.47431e-05
510	2.04652e-05	6.1643e-05	4.10542e-05
511	2.14885e-05	6.0359e-05	4.09237e-05
512	2.14885e-05	6.0359e-05	4.09237e-05
513	2.14885e-05	6.0359e-05	4.09237e-05
514	2.09768e-05	5.0085e-05	3.5531e-05
515	2.17955e-05	5.0085e-05	3.59403e-05
516	2.05675e-05	5.0085e-05	3.53263e-05
517	2.01582e-05	4.8801e-05	3.44796e-05
518	2.03629e-05	4.8801e-05	3.45819e-05
519	2.04652e-05	4.8801e-05	3.46331e-05
520	2.05675e-05	4.8801e-05	3.46842e-05
521	2.03629e-05	4.8801e-05	3.45819e-05
522	1.72931e-05	3.8527e-05	2.79101e-05
523	1.73954e-05	3.8527e-05	2.79612e-05
524	1.74978e-05	3.8527e-05	2.80124e-05
525	1.70885e-05	3.8527e-05	2.78077e-05
526	8.80004e-06	2.1832e-05	1.5316e-05
527	8.08376e-06	2.0548e-05	1.43158e-05
528	3.88839e-06	1.4127e-05	9.00749e-06
529	5.62793e-06	1.2842e-05	9.23514e-06
530	5.62793e-06	1.2842e-05	9.23514e-06
531	5.01398e-06	1.2842e-05	8.92816e-06
532	5.21863e-06	1.4127e-05	9.6726e-06
533	5.83259e-06	1.5411e-05	1.06217e-05
534	5.83259e-06	1.5411e-05	1.06217e-05
535	5.73026e-06	1.1558e-05	8.64419e-06
536	5.83259e-06	1.1558e-05	8.69535e-06
537	6.13956e-06	1.1558e-05	8.84884e-06
538	6.03724e-06	1.1558e-05	8.79767e-06
539	5.73026e-06	1.1558e-05	8.64419e-06
540	5.1163e-06	7.7054e-06	6.41086e-06
541	6.65119e-06	1.7979e-05	1.23152e-05
542	6.65119e-06	1.7979e-05	1.23152e-05
543	6.54887e-06	1.7979e-05	1.22641e-05
544	6.54887e-06	1.2842e-05	9.69561e-06
545	1.73954e-05	3.2106e-05	2.47506e-05
546	1.76001e-05	3.2106e-05	2.4853e-05
547	1.76001e-05	3.2106e-05	2.4853e-05
548	1.77024e-05	3.2106e-05	2.49041e-05
549	1.77024e-05	3.2106e-05	2.49041e-05
550	1.74978e-05	3.2106e-05	2.48018e-05
551	1.83164e-05	3.339e-05	2.58532e-05
552	1.8214e-05	3.339e-05	2.58021e-05
553	1.80094e-05	3.339e-05	2.56997e-05
554	1.80094e-05	3.339e-05	2.56997e-05
555	1.80094e-05	3.339e-05	2.56997e-05
556	1.78047e-05	3.339e-05	2.55974e-05
557	1.78047e-05	3.339e-05	2.55974e-05
558	1.67815e-05	3.339e-05	2.50858e-05
559	1.54512e-05	3.339e-05	2.44207e-05
560	1.3814e-05	2.9537e-05	2.16757e-05
561	1.3814e-05	2.9537e-05	2.16757e-05
562	1.37117e-05	2.9537e-05	2.16245e-05
563	1.36094e-05	2.9537e-05	2.15734e-05
564	1.23815e-05	2.9537e-05	2.09594e-05
565	3.99072e-06	7.7054e-06	5.84806e-06
566	3.99072e-06	7.7054e-06	5.84806e-06
567	3.47909e-06	2.5685e-06	3.02378e-06
568	1.22791e-06	1.2842e-06	1.25607e-06
569	1.22791e-06	1.2842e-06	1.25607e-06
570	8.18609e-07	1.2842e-06	1.05142e-06
571	7.16283e-07	0	3.58141e-07
572	7.16283e-07	0	3.58141e-07
573	8.18609e-07	0	4.09304e-07
574	9.20935e-07	0	4.60467e-07
575	9.20935e-07	0	4.60467e-07
576	1.02326e-06	0	5.1163e-07
577	1.02326e-06	0	5.1163e-07
578	2.04652e-06	1.2842e-06	1.66538e-06
579	2.14885e-06	1.2842e-06	1.71654e-06
580	2.14885e-06	1.2842e-06	1.71654e-06
581	4.60467e-06	1.2842e-06	2.94445e-06
582	4.60467e-06	1.2842e-06	2.94445e-06
583	4.50235e-06	1.2842e-06	2.89329e-06
584	7.26515e-06	3.8527e-06	5.55893e-06
585	7.36748e-06	3.8527e-06	5.61009e-06
586	7.26515e-06	3.8527e-06	5.55893e-06
587	7.77678e-06	3.8527e-06	5.81474e-06
588	7.87911e-06	3.8527e-06	5.86591e-06
589	7.87911e-06	3.8527e-06	5.86591e-06
590	7.87911e-06	3.8527e-06	5.86591e-06
591	7.98143e-06	3.8527e-06	5.91707e-06
592	1.42233e-05	1.6695e-05	1.54592e-05
593	1.45303e-05	1.7979e-05	1.62548e-05
594	1.55536e-05	2.0548e-05	1.80507e-05
595	2.42513e-05	3.5959e-05	3.01049e-05
596	2.48652e-05	3.5959e-05	3.04119e-05
597	3.12095e-05	5.0085e-05	4.06473e-05
598	3.19257e-05	5.0085e-05	4.10054e-05
599	3.2642e-05	5.0085e-05	4.13636e-05
600	3.18234e-05	5.0085e-05	4.09543e-05
601	3.28467e-05	5.0085e-05	4.14659e-05
602	3.27443e-05	5.0085e-05	4.14147e-05
603	3.21304e-05	5.0085e-05	4.11078e-05
604	4.05211e-05	5.2654e-05	4.65874e-05
605	4.05211e-05	5.2654e-05	4.65874e-05
606	4.06235e-05	5.2654e-05	4.66385e-05
607	4.04188e-05	5.2654e-05	4.65362e-05
608	4.04188e-05	5.2654e-05	4.65362e-05
609	4.05211e-05	5.2654e-05	4.65874e-05
610	3.89862e-05	5.1369e-05	4.51778e-05
611	4.51258e-05	6.1643e-05	5.33845e-05
612	4.54328e-05	6.1643e-05	5.3538e-05
613	4.54328e-05	6.1643e-05	5.3538e-05
614	4.54328e-05	5.9075e-05	5.22538e-05
615	4.707e-05	5.9075e-05	5.30724e-05
616	4.02141e-05	3.7243e-05	3.87285e-05
617	5.2391e-05	4.3664e-05	4.80275e-05
618	5.28003e-05	4.3664e-05	4.82321e-05
619	5.2391e-05	4.3664e-05	4.80275e-05
620	5.2391e-05	4.3664e-05	4.80275e-05
621	5.16747e-05	4.3664e-05	4.76693e-05
622	5.08561e-05	4.4948e-05	4.79021e-05
623	3.94979e-05	2.44e-05	3.19492e-05
624	4.16467e-05	2.44e-05	3.30236e-05
625	4.10328e-05	2.44e-05	3.27166e-05
626	3.96002e-05	2.8253e-05	3.39267e-05
627	5.60747e-05	4.238e-05	4.92272e-05
628	5.6484e-05	4.238e-05	4.94319e-05
629	5.68933e-05	4.238e-05	4.96365e-05
630	5.66886e-05	4.238e-05	4.95342e-05
631	5.32096e-05	4.238e-05	4.77946e-05
632	5.32096e-05	4.238e-05	4.77946e-05
633	5.29026e-05	4.238e-05	4.76412e-05
634	4.94235e-05	4.238e-05	4.59016e-05
635	4.86049e-05	4.238e-05	4.54923e-05
636	4.6763e-05	4.238e-05	4.45714e-05
637	3.77583e-05	3.9811e-05	3.87848e-05
638	5.94515e-05	4.4948e-05	5.21998e-05
639	6.00654e-05	4.4948e-05	5.25068e-05
640	6.31352e-05	4.7517e-05	5.53259e-05
641	5.97584e-05	4.6232e-05	5.29954e-05
642	7.16283e-05	4.8801e-05	6.02146e-05
643	7.30608e-05	4.8801e-05	6.09309e-05
644	7.30608e-05	4.8801e-05	6.09309e-05
645	7.30608e-05	4.8801e-05	6.09309e-05
646	6.35445e-05	4.238e-05	5.29621e-05
647	6.47724e-05	4.238e-05	5.35761e-05
648	6.47724e-05	4.238e-05	5.35761e-05
649	6.47724e-05	4.238e-05	5.35761e-05
650	6.47724e-05	4.238e-05	5.35761e-05
651	6.46701e-05	4.238e-05	5.35249e-05
652	6.44654e-05	4.1096e-05	5.27805e-05
653	6.44654e-05	4.1096e-05	5.27805e-05
654	6.32375e-05	3.8527e-05	5.08823e-05
655	6.33398e-05	3.8527e-05	5.09334e-05
656	6.25212e-05	3.8527e-05	5.05241e-05
657	4.10328e-05	3.4674e-05	3.78535e-05
658	4.04188e-05	3.4674e-05	3.75466e-05
659	3.98048e-05	3.4674e-05	3.72396e-05
660	3.91909e-05	3.4674e-05	3.69326e-05
661	3.61211e-05	3.339e-05	3.47556e-05
662	3.68374e-06	1.5411e-05	9.54728e-06
663	6.44654e-06	1.6695e-05	1.15708e-05
664	7.16283e-06	1.7979e-05	1.25711e-05
665	7.4698e-06	1.7979e-05	1.27245e-05
666	7.4698e-06	1.7979e-05	1.27245e-05
667	7.57213e-06	1.7979e-05	1.27757e-05
668	7.36748e-06	1.6695e-05	1.20313e-05
669	8.80004e-06	1.6695e-05	1.27475e-05
670	8.80004e-06	1.6695e-05	1.27475e-05
671	8.80004e-06	1.6695e-05	1.27475e-05
672	8.69772e-06	1.6695e-05	1.26964e-05
673	8.69772e-06	1.6695e-05	1.26964e-05
674	8.69772e-06	1.6695e-05	1.26964e-05
675	8.49306e-06	1.6695e-05	1.25941e-05
676	8.49306e-06	1.6695e-05	1.25941e-05
677	8.49306e-06	1.6695e-05	1.25941e-05
678	8.28841e-06	1.6695e-05	1.24917e-05
679	6.85585e-06	1.4127e-05	1.04912e-05
680	6.85585e-06	1.4127e-05	1.04912e-05
681	6.54887e-06	1.0274e-05	8.41137e-06
682	6.75352e-06	1.0274e-05	8.5137e-06
683	6.75352e-06	1.0274e-05	8.5137e-06
684	4.50235e-06	2.5685e-06	3.53541e-06
685	4.80933e-06	3.8527e-06	4.33101e-06
686	4.80933e-06	7.7054e-06	6.25737e-06
687	4.60467e-06	7.7054e-06	6.15504e-06
688	2.66048e-06	6.4212e-06	4.54083e-06
689	2.86513e-06	6.4212e-06	4.64315e-06
690	2.7628e-06	6.4212e-06	4.59199e-06
691	2.04652e-06	6.4212e-06	4.23385e-06
692	2.25117e-06	6.4212e-06	4.33617e-06
693	2.25117e-06	6.4212e-06	4.33617e-06
694	2.25117e-06	6.4212e-06	4.33617e-06
695	2.25117e-06	6.4212e-06	4.33617e-06
696	2.25117e-06	6.4212e-06	4.33617e-06
697	2.25117e-06	6.4212e-06	4.33617e-06
698	2.14885e-06	5.1369e-06	3.64289e-06
699	2.3535e-06	5.1369e-06	3.74522e-06
700	2.25117e-06	5.1369e-06	3.69406e-06
701	3.27443e-06	5.1369e-06	4.20569e-06
702	3.37676e-06	5.1369e-06	4.25685e-06
703	3.37676e-06	5.1369e-06	4.25685e-06
704	3.37676e-06	5.1369e-06	4.25685e-06
705	3.37676e-06	5.1369e-06	4.25685e-06
706	3.27443e-06	5.1369e-06	4.20569e-06
707	2.04652e-06	5.1369e-06	3.59173e-06
708	2.7628e-06	5.1369e-06	3.94987e-06
709	2.7628e-06	5.1369e-06	3.94987e-06
710	2.7628e-06	5.1369e-06	3.94987e-06
711	4.2977e-06	5.1369e-06	4.71732e-06
712	4.2977e-06	5.1369e-06	4.71732e-06
713	4.2977e-06	5.1369e-06	4.71732e-06
714	4.19537e-06	5.1369e-06	4.66615e-06
715	5.52561e-06	5.1369e-06	5.33127e-06
716	5.52561e-06	5.1369e-06	5.33127e-06
717	5.62793e-06	5.1369e-06	5.38244e-06
718	5.62793e-06	5.1369e-06	5.38244e-06
719	5.62793e-06	5.1369e-06	5.38244e-06
720	7.4698e-06	5.1369e-06	6.30337e-06
721	7.4698e-06	5.1369e-06	6.30337e-06
722	7.4698e-06	5.1369e-06	6.30337e-06
723	7.4698e-06	5.1369e-06	6.30337e-06
724	7.26515e-06	5.1369e-06	6.20104e-06
725	7.26515e-06	5.1369e-06	6.20104e-06
726	6.95817e-06	5.1369e-06	6.04756e-06
727	6.95817e-06	5.1369e-06	6.04756e-06
728	6.75352e-06	5.1369e-06	5.94523e-06
729	6.54887e-06	5.1369e-06	5.8429e-06
730	5.42328e-06	5.1369e-06	5.28011e-06
731	5.42328e-06	5.1369e-06	5.28011e-06
732	4.91165e-06	5.1369e-06	5.02429e-06
733	4.91165e-06	5.1369e-06	5.02429e-06
734	4.40002e-06	5.1369e-06	4.76848e-06
735	4.40002e-06	5.1369e-06	4.76848e-06
736	4.40002e-06	5.1369e-06	4.76848e-06
737	4.2977e-06	5.1369e-06	4.71732e-06
738	4.2977e-06	5.1369e-06	4.71732e-06
739	4.19537e-06	5.1369e-06	4.66615e-06
740	4.19537e-06	5.1369e-06	4.66615e-06
741	4.09304e-06	5.1369e-06	4.61499e-06
742	3.88839e-06	5.1369e-06	4.51266e-06
743	3.58141e-06	5.1369e-06	4.35918e-06
744	3.68374e-06	5.1369e-06	4.41034e-06
745	3.37676e-06	5.1369e-06	4.25685e-06
746	2.66048e-06	3.8527e-06	3.25659e-06
747	2.04652e-06	1.2842e-06	1.66538e-06
748	2.04652e-06	0	1.02326e-06
749	2.04652e-06	1.2842e-06	1.66538e-06
750	2.14885e-06	1.2842e-06	1.71654e-06
751	2.04652e-06	1.2842e-06	1.66538e-06
752	2.04652e-06	1.2842e-06	1.66538e-06
753	2.04652e-06	1.2842e-06	1.66538e-06
754	2.04652e-06	1.2842e-06	1.66538e-06
755	1.9442e-06	1.2842e-06	1.61421e-06
756	1.9442e-06	1.2842e-06	1.61421e-06
757	1.73954e-06	1.2842e-06	1.51189e-06
758	1.73954e-06	1.2842e-06	1.51189e-06
759	1.33024e-06	1.2842e-06	1.30724e-06
760	1.33024e-06	1.2842e-06	1.30724e-06
761	1.33024e-06	1.2842e-06	1.30724e-06
762	1.33024e-06	1.2842e-06	1.30724e-06
763	1.33024e-06	1.2842e-06	1.30724e-06
764	1.33024e-06	1.2842e-06	1.30724e-06
765	1.22791e-06	1.2842e-06	1.25607e-06
766	1.22791e-06	1.2842e-06	1.25607e-06
767	1.12559e-06	1.2842e-06	1.20491e-06
768	1.12559e-06	1.2842e-06	1.20491e-06
769	1.12559e-06	1.2842e-06	1.20491e-06
770	1.02326e-06	1.2842e-06	1.15375e-06
771	1.12559e-06	1.2842e-06	1.20491e-06
772	8.18609e-07	1.2842e-06	1.05142e-06
773	7.16283e-07	1.2842e-06	1.00026e-06
774	9.20935e-07	1.2842e-06	1.10258e-06
775	1.53489e-06	1.2842e-06	1.40956e-06
776	1.53489e-06	1.2842e-06	1.40956e-06
777	1.63722e-06	1.2842e-06	1.46073e-06
778	1.63722e-06	1.2842e-06	1.46073e-06
779	1.63722e-06	1.2842e-06	1.46073e-06
780	1.63722e-06	1.2842e-06	1.46073e-06
781	1.84187e-06	1.2842e-06	1.56305e-06
782	1.84187e-06	1.2842e-06	1.56305e-06
783	1.84187e-06	1.2842e-06	1.56305e-06
784	1.84187e-06	1.2842e-06	1.56305e-06
785	1.84187e-06	1.2842e-06	1.56305e-06
786	1.84187e-06	1.2842e-06	1.56305e-06
787	1.84187e-06	1.2842e-06	1.56305e-06
788	1.84187e-06	1.2842e-06	1.56305e-06
789	1.9442e-06	1.2842e-06	1.61421e-06
790	1.84187e-06	1.2842e-06	1.56305e-06
791	1.84187e-06	1.2842e-06	1.56305e-06
792	1.73954e-06	1.2842e-06	1.51189e-06
793	2.45583e-06	1.2842e-06	1.87003e-06
794	2.45583e-06	1.2842e-06	1.87003e-06
795	2.45583e-06	1.2842e-06	1.87003e-06
796	2.45583e-06	1.2842e-06	1.87003e-06
797	2.7628e-06	2.5685e-06	2.66564e-06
798	2.66048e-06	3.8527e-06	3.25659e-06
799	3.99072e-06	1.5411e-05	9.70077e-06
800	3.99072e-06	1.5411e-05	9.70077e-06
801	4.10328e-05	7.577e-05	5.84013e-05
802	4.55351e-05	9.7602e-05	7.15685e-05
803	4.63537e-05	9.8886e-05	7.26199e-05
804	5.1163e-05	0.00010274	7.69509e-05
805	5.12654e-05	0.00010274	7.70021e-05
806	5.147e-05	0.00010274	7.71044e-05
807	5.18793e-05	0.00010402	7.79512e-05
808	5.19816e-05	0.00010659	7.92866e-05
809	5.2084e-05	0.00010659	7.93377e-05
810	5.26979e-05	0.00010659	7.96447e-05
811	5.26979e-05	0.00010788	8.02868e-05
812	5.26979e-05	0.00010788	8.02868e-05
813	5.30049e-05	0.00010788	8.04403e-05
814	7.12189e-05	0.00011044	9.08316e-05
815	7.23445e-05	0.00011044	9.13944e-05
816	7.26515e-05	0.00011044	9.15478e-05
817	7.28562e-05	0.00011044	9.16502e-05
818	7.33678e-05	0.00011044	9.1906e-05
819	7.37771e-05	0.00011044	9.21106e-05
820	7.38794e-05	0.00011044	9.21618e-05
821	7.39818e-05	0.00011044	9.2213e-05
822	6.69213e-05	0.00010402	8.54721e-05
823	6.16003e-05	0.00010145	8.15274e-05
824	4.92188e-05	8.4759e-05	6.69892e-05
825	5.10607e-05	8.4759e-05	6.79101e-05
826	5.07537e-05	8.3475e-05	6.71145e-05
827	5.06514e-05	8.3475e-05	6.70633e-05
828	5.04468e-05	8.3475e-05	6.6961e-05
829	4.49211e-05	7.4486e-05	5.97034e-05
830	3.7963e-05	5.3938e-05	4.59504e-05
831	3.827e-05	5.3938e-05	4.61039e-05
832	3.81676e-05	4.7517e-05	4.28422e-05
833	3.04932e-05	3.0822e-05	3.06574e-05
834	1.4735e-05	2.1832e-05	1.82835e-05
835	1.56559e-05	2.0548e-05	1.81018e-05
836	1.56559e-05	1.9264e-05	1.74597e-05
837	1.54512e-05	1.7979e-05	1.67153e-05
838	1.53489e-05	1.6695e-05	1.6022e-05
839	1.36094e-05	1.6695e-05	1.51522e-05
840	1.07442e-05	6.4212e-06	8.58271e-06
841	1.23815e-05	5.1369e-06	8.7592e-06
842	1.24838e-05	5.1369e-06	8.81036e-06
843	1.22791e-05	5.1369e-06	8.70803e-06
844	1.18698e-05	5.1369e-06	8.50338e-06
845	6.65119e-06	2.5685e-06	4.60983e-06
846	9.10702e-06	2.5685e-06	5.83774e-06
847	7.26515e-06	2.5685e-06	4.91681e-06
848	1.54512e-05	3.8527e-06	9.65197e-06
849	1.58605e-05	3.8527e-06	9.85662e-06
850	1.60652e-05	1.2842e-06	8.67471e-06
851	1.66792e-05	1.2842e-06	8.98169e-06
852	1.64745e-05	1.2842e-06	8.87937e-06
853	2.3228e-05	1.2842e-06	1.22561e-05
854	2.33303e-05	1.2842e-06	1.23073e-05
855	2.34327e-05	1.2842e-06	1.23585e-05
856	2.34327e-05	1.2842e-06	1.23585e-05
857	2.34327e-05	1.2842e-06	1.23585e-05
858	2.34327e-05	1.2842e-06	1.23585e-05
859	2.34327e-05	1.2842e-06	1.23585e-05
860	2.31257e-05	1.2842e-06	1.2205e-05
861	2.18978e-05	1.2842e-06	1.1591e-05
862	2.26141e-05	1.2842e-06	1.19491e-05
863	2.26141e-05	1.2842e-06	1.19491e-05
864	2.26141e-05	1.2842e-06	1.19491e-05
865	2.25117e-05	1.2842e-06	1.1898e-05
866	2.25117e-05	1.2842e-06	1.1898e-05
867	1.18698e-05	1.2842e-06	6.57703e-06
868	1.19722e-05	0	5.98608e-06
869	1.18698e-05	0	5.93491e-06
870	1.18698e-05	0	5.93491e-06
871	1.13582e-05	0	5.6791e-06
872	1.09489e-05	0	5.47445e-06
873	9.92563e-06	0	4.96281e-06
874	4.91165e-06	0	2.45583e-06
875	4.80933e-06	0	2.40466e-06
876	3.68374e-06	0	1.84187e-06
877	3.99072e-06	0	1.99536e-06
878	3.88839e-06	0	1.9442e-06
879	3.37676e-06	0	1.68838e-06
880	4.19537e-06	0	2.09768e-06
881	4.2977e-06	0	2.14885e-06
882	4.19537e-06	0	2.09768e-06
883	3.99072e-06	0	1.99536e-06
884	3.06978e-06	0	1.53489e-06
885	3.17211e-06	0	1.58605e-06
886	2.25117e-06	0	1.12559e-06
887	2.25117e-06	1.2842e-06	1.7677e-06
888	2.14885e-06	1.2842e-06	1.71654e-06
889	1.84187e-06	1.2842e-06	1.56305e-06
890	2.04652e-06	1.2842e-06	1.66538e-06
891	2.04652e-06	1.2842e-06	1.66538e-06
892	2.04652e-06	1.2842e-06	1.66538e-06
893	1.84187e-06	1.2842e-06	1.56305e-06
894	2.86513e-06	1.2842e-06	2.07468e-06
895	2.86513e-06	1.2842e-06	2.07468e-06
896	2.86513e-06	1.2842e-06	2.07468e-06
897	2.86513e-06	1.2842e-06	2.07468e-06
898	2.7628e-06	1.2842e-06	2.02352e-06
899	2.7628e-06	1.2842e-06	2.02352e-06
900	2.7628e-06	1.2842e-06	2.02352e-06
901	2.04652e-06	1.2842e-06	1.66538e-06
902	5.1163e-06	8.9896e-06	7.05297e-06
903	5.1163e-06	8.9896e-06	7.05297e-06
904	5.1163e-06	8.9896e-06	7.05297e-06
905	5.1163e-06	8.9896e-06	7.05297e-06
906	5.21863e-06	8.9896e-06	7.10414e-06
907	5.01398e-06	8.9896e-06	7.00181e-06
908	6.75352e-06	1.2842e-05	9.79793e-06
909	6.85585e-06	1.2842e-05	9.8491e-06
910	7.77678e-06	1.4127e-05	1.09517e-05
911	8.49306e-06	1.4127e-05	1.13098e-05
912	8.28841e-06	1.4127e-05	1.12075e-05
913	7.87911e-06	1.4127e-05	1.10028e-05
914	1.9442e-05	1.7979e-05	1.87106e-05
915	2.11815e-05	1.7979e-05	1.95804e-05
916	2.12838e-05	1.7979e-05	1.96316e-05
917	2.15908e-05	1.7979e-05	1.9785e-05
918	2.15908e-05	1.6695e-05	1.91429e-05
919	2.14885e-05	1.6695e-05	1.90918e-05
920	2.43536e-05	1.6695e-05	2.05243e-05
921	2.51722e-05	1.6695e-05	2.09336e-05
922	2.46606e-05	1.4127e-05	1.93936e-05
923	3.827e-05	1.4127e-05	2.61983e-05
924	3.90886e-05	1.4127e-05	2.66076e-05
925	3.92932e-05	1.4127e-05	2.67099e-05
926	3.96002e-05	1.4127e-05	2.68634e-05
927	3.96002e-05	1.4127e-05	2.68634e-05
928	3.97025e-05	1.4127e-05	2.69145e-05
929	3.97025e-05	1.4127e-05	2.69145e-05
930	3.96002e-05	1.4127e-05	2.68634e-05
931	3.94979e-05	1.2842e-05	2.61701e-05
932	3.94979e-05	1.2842e-05	2.61701e-05
933	3.89862e-05	1.2842e-05	2.59143e-05
934	3.62234e-05	1.2842e-05	2.45329e-05
935	3.55071e-05	1.2842e-05	2.41747e-05
936	3.40746e-05	1.0274e-05	2.21742e-05
937	2.94699e-05	6.4212e-06	1.79455e-05
938	2.12838e-05	1.2842e-06	1.1284e-05
939	2.34327e-05	0	1.17163e-05
940	2.34327e-05	0	1.17163e-05
941	2.33303e-05	0	1.16652e-05
942	2.15908e-05	0	1.07954e-05
943	1.17675e-05	0	5.88375e-06
944	1.34047e-05	0	6.70236e-06
945	1.34047e-05	0	6.70236e-06
946	1.29954e-05	0	6.49771e-06
947	1.29954e-05	0	6.49771e-06
948	1.25861e-05	0	6.29305e-06
949	6.54887e-06	0	3.27443e-06
950	7.26515e-06	0	3.63258e-06
951	7.26515e-06	0	3.63258e-06
952	6.85585e-06	0	3.42792e-06
953	7.0605e-06	0	3.53025e-06
954	7.0605e-06	0	3.53025e-06
955	7.0605e-06	0	3.53025e-06
956	6.75352e-06	0	3.37676e-06
957	6.75352e-06	0	3.37676e-06
958	6.54887e-06	0	3.27443e-06
959	6.54887e-06	0	3.27443e-06
960	6.34422e-06	0	3.17211e-06
961	5.93491e-06	0	2.96746e-06
962	5.73026e-06	0	2.86513e-06
963	4.2977e-06	0	2.14885e-06
964	2.96746e-06	0	1.48373e-06
965	3.27443e-06	0	1.63722e-06
966	3.27443e-06	0	1.63722e-06
967	2.7628e-06	0	1.3814e-06
968	4.09304e-06	0	2.04652e-06
969	4.09304e-06	0	2.04652e-06
970	3.58141e-06	0	1.79071e-06
971	5.21863e-06	0	2.60931e-06
972	5.42328e-06	0	2.71164e-06
973	5.52561e-06	0	2.7628e-06
974	1.46326e-05	1.2842e-06	7.95843e-06
975	1.51443e-05	1.2842e-06	8.21425e-06
976	1.58605e-05	1.2842e-06	8.57239e-06
977	1.59629e-05	1.2842e-06	8.62355e-06
978	1.59629e-05	1.2842e-06	8.62355e-06
979	1.59629e-05	1.2842e-06	8.62355e-06
980	1.59629e-05	1.2842e-06	8.62355e-06
981	1.59629e-05	1.2842e-06	8.62355e-06
982	1.58605e-05	1.2842e-06	8.57239e-06
983	1.58605e-05	1.2842e-06	8.57239e-06
984	1.58605e-05	1.2842e-06	8.57239e-06
985	1.58605e-05	1.2842e-06	8.57239e-06
986	1.57582e-05	1.2842e-06	8.52123e-06
987	1.56559e-05	1.2842e-06	8.47006e-06
988	1.49396e-05	1.2842e-06	8.11192e-06
989	1.48373e-05	1.2842e-06	8.06076e-06
990	1.40187e-05	1.2842e-06	7.65145e-06
991	1.37117e-05	1.2842e-06	7.49796e-06
992	1.37117e-05	1.2842e-06	7.49796e-06
993	1.36094e-05	1.2842e-06	7.4468e-06
994	1.34047e-05	1.2842e-06	7.34448e-06
995	1.02326e-05	1.2842e-06	5.75842e-06
996	8.80004e-06	1.2842e-06	5.04214e-06
997	5.52561e-06	1.2842e-06	3.40492e-06
998	6.34422e-06	1.2842e-06	3.81423e-06
999	6.03724e-06	1.2842e-06	3.66074e-06
1000	5.93491e-06	1.2842e-06	3.60957e-06
1001	2.14885e-06	0	1.07442e-06
1002	2.25117e-06	0	1.12559e-06
1003	2.25117e-06	0	1.12559e-06
1004	1.73954e-06	0	8.69772e-07
1005	2.45583e-06	0	1.22791e-06
1006	2.45583e-06	0	1.22791e-06
1007	2.55815e-06	0	1.27908e-06
1008	2.45583e-06	0	1.22791e-06
1009	2.25117e-06	0	1.12559e-06
1010	2.3535e-06	0	1.17675e-06
1011	2.3535e-06	0	1.17675e-06
1012	2.3535e-06	0	1.17675e-06
1013	2.04652e-06	0	1.02326e-06
1014	2.25117e-06	0	1.12559e-06
1015	2.14885e-06	0	1.07442e-06
1016	4.80933e-06	0	2.40466e-06
1017	4.80933e-06	0	2.40466e-06
1018	4.707e-06	0	2.3535e-06
1019	5.01398e-06	0	2.50699e-06
1020	5.01398e-06	0	2.50699e-06
1021	5.01398e-06	0	2.50699e-06
1022	5.1163e-06	0	2.55815e-06
1023	5.1163e-06	0	2.55815e-06
1024	4.91165e-06	0	2.45583e-06
1025	4.91165e-06	0	2.45583e-06
1026	4.60467e-06	0	2.30234e-06
1027	4.60467e-06	0	2.30234e-06
1028	4.2977e-06	0	2.14885e-06
1029	4.09304e-06	0	2.04652e-06
1030	4.707e-06	0	2.3535e-06
1031	4.707e-06	0	2.3535e-06
1032	4.707e-06	0	2.3535e-06
1033	4.707e-06	0	2.3535e-06
1034	4.91165e-06	0	2.45583e-06
1035	4.91165e-06	0	2.45583e-06
1036	4.80933e-06	0	2.40466e-06
1037	3.88839e-06	0	1.9442e-06
1038	3.99072e-06	0	1.99536e-06
1039	3.47909e-06	0	1.73954e-06
1040	3.58141e-06	0	1.79071e-06
1041	1.63722e-06	0	8.18609e-07
1042	3.27443e-06	0	1.63722e-06
1043	3.37676e-06	0	1.68838e-06
1044	3.58141e-06	0	1.79071e-06
1045	3.58141e-06	0	1.79071e-06
1046	4.50235e-06	0	2.25117e-06
1047	4.60467e-06	0	2.30234e-06
1048	4.40002e-06	0	2.20001e-06
1049	2.04652e-05	1.7979e-05	1.92222e-05
1050	2.09768e-05	1.7979e-05	1.94781e-05
1051	2.10792e-05	1.7979e-05	1.95292e-05
1052	2.13861e-05	1.7979e-05	1.96827e-05
1053	2.14885e-05	1.7979e-05	1.97339e-05
1054	2.15908e-05	1.7979e-05	1.9785e-05
1055	2.15908e-05	1.7979e-05	1.9785e-05
1056	2.15908e-05	1.7979e-05	1.9785e-05
1057	2.14885e-05	1.7979e-05	1.97339e-05
1058	2.14885e-05	1.7979e-05	1.97339e-05
1059	2.28187e-05	1.7979e-05	2.0399e-05
1060	2.30234e-05	1.9264e-05	2.11434e-05
1061	2.36373e-05	2.0548e-05	2.20925e-05
1062	4.21583e-05	4.4948e-05	4.35533e-05
1063	4.69677e-05	5.6506e-05	5.1737e-05
1064	4.71723e-05	5.6506e-05	5.18393e-05
1065	7.69492e-05	9.1181e-05	8.40649e-05
1066	7.92004e-05	9.1181e-05	8.51905e-05
1067	7.93027e-05	9.1181e-05	8.52417e-05
1068	7.96097e-05	9.1181e-05	8.53952e-05
1069	7.95074e-05	9.1181e-05	8.5344e-05
1070	7.95074e-05	9.1181e-05	8.5344e-05
1071	7.9405e-05	9.1181e-05	8.52928e-05
1072	7.74608e-05	9.1181e-05	8.43207e-05
1073	7.66422e-05	9.1181e-05	8.39114e-05
1074	7.62329e-05	9.1181e-05	8.37068e-05
1075	7.12189e-05	8.9896e-05	8.05577e-05
1076	7.5312e-05	9.2465e-05	8.38884e-05
1077	7.49027e-05	9.2465e-05	8.36838e-05
1078	7.49027e-05	9.2465e-05	8.36838e-05
1079	7.4698e-05	9.2465e-05	8.35815e-05
1080	7.26515e-05	9.2465e-05	8.25582e-05
1081	7.21399e-05	8.9896e-05	8.10181e-05
1082	7.20376e-05	8.9896e-05	8.0967e-05
1083	7.0298e-05	8.8612e-05	7.94551e-05
1084	6.83538e-05	8.8612e-05	7.8483e-05
1085	3.81676e-05	6.5496e-05	5.18318e-05
1086	4.01118e-05	6.5496e-05	5.28039e-05
1087	4.00095e-05	6.5496e-05	5.27527e-05
1088	4.03165e-05	6.4212e-05	5.22641e-05
1089	3.84746e-05	5.9075e-05	4.87747e-05
1090	3.2335e-05	5.5222e-05	4.37786e-05
1091	3.09025e-05	5.5222e-05	4.30623e-05
1092	1.78047e-05	3.4674e-05	2.62395e-05
1093	1.97489e-05	3.4674e-05	2.72116e-05
1094	1.9135e-05	3.4674e-05	2.69047e-05
1095	1.70885e-05	2.9537e-05	2.33129e-05
1096	1.21768e-05	1.4127e-05	1.31517e-05
1097	1.4428e-05	1.4127e-05	1.42773e-05
1098	1.4428e-05	1.4127e-05	1.42773e-05
1099	1.24838e-05	8.9896e-06	1.07367e-05
1100	1.30977e-05	8.9896e-06	1.10437e-05
1101	1.15628e-05	8.9896e-06	1.02762e-05
1102	1.34047e-05	8.9896e-06	1.11972e-05
1103	1.3507e-05	8.9896e-06	1.12483e-05
1104	1.40187e-05	8.9896e-06	1.15042e-05
1105	1.37117e-05	8.9896e-06	1.13507e-05
1106	1.8828e-05	8.9896e-06	1.39088e-05
1107	1.8828e-05	8.9896e-06	1.39088e-05
1108	1.8828e-05	8.9896e-06	1.39088e-05
1109	1.89303e-05	8.9896e-06	1.396e-05
1110	1.77024e-05	8.9896e-06	1.3346e-05
1111	1.73954e-05	7.7054e-06	1.25504e-05
1112	1.24838e-05	1.2842e-06	6.88401e-06
1113	2.23071e-05	0	1.11535e-05
1114	2.27164e-05	1.2842e-06	1.20003e-05
1115	2.72187e-05	7.7054e-06	1.74621e-05
1116	3.53025e-05	1.0274e-05	2.27882e-05
1117	3.46885e-05	1.0274e-05	2.24812e-05
1118	5.09584e-05	1.5411e-05	3.31846e-05
1119	5.12654e-05	1.5411e-05	3.33381e-05
1120	5.28003e-05	1.7979e-05	3.53898e-05
1121	7.85864e-05	5.0085e-05	6.43358e-05
1122	7.88934e-05	5.1369e-05	6.51314e-05
1123	7.99167e-05	5.1369e-05	6.5643e-05
1124	8.06329e-05	5.1369e-05	6.60012e-05
1125	8.04283e-05	5.1369e-05	6.58988e-05
1126	0.000114196	6.4212e-05	8.92038e-05
1127	0.000117163	6.5496e-05	9.13297e-05
1128	0.000124326	6.5496e-05	9.49111e-05
1129	0.000126066	6.5496e-05	9.57808e-05
1130	0.000144177	7.9623e-05	0.0001119
1131	0.000146633	8.0907e-05	0.00011377
1132	0.000146736	8.0907e-05	0.000113821
1133	0.000146736	8.0907e-05	0.000113821
1134	0.000146326	8.0907e-05	0.000113617
1135	0.000146224	8.0907e-05	0.000113565
1136	0.000145508	8.0907e-05	0.000113207
1137	0.000136605	8.0907e-05	0.000108756
1138	0.000131489	8.0907e-05	0.000106198
1139	0.000158298	0.00013099	0.000144645
1140	0.000161573	0.00013613	0.000148851
1141	0.000161573	0.00013613	0.000148851
1142	0.000161778	0.00013613	0.000148953
1143	0.000161982	0.00013741	0.000149698
1144	0.000161471	0.00013741	0.000149442
1145	0.000152875	0.00013484	0.00014386
1146	0.000151852	0.00013484	0.000143348
1147	0.000146531	0.00013356	0.000140046
1148	0.000105089	0.00011301	0.000109051
1149	0.000105191	0.00011301	0.000109102
1150	0.000103145	0.00011173	0.000107437
1151	6.68189e-05	9.8886e-05	8.28525e-05
1152	6.74329e-05	9.8886e-05	8.31595e-05
1153	6.46701e-05	9.8886e-05	8.17781e-05
1154	6.44654e-05	9.8886e-05	8.16757e-05
1155	6.44654e-05	9.8886e-05	8.16757e-05
1156	6.07817e-05	8.7328e-05	7.40548e-05
1157	6.29305e-05	8.7328e-05	7.51292e-05
1158	6.29305e-05	8.7328e-05	7.51292e-05
1159	6.09863e-05	8.4759e-05	7.28729e-05
1160	5.99631e-05	8.2191e-05	7.1077e-05
1161	5.99631e-05	8.2191e-05	7.1077e-05
1162	5.46421e-05	7.9623e-05	6.71323e-05
1163	1.37117e-05	1.1558e-05	1.26349e-05
1164	1.40187e-05	1.0274e-05	1.21463e-05
1165	1.26884e-05	8.9896e-06	1.0839e-05
1166	8.69772e-06	3.8527e-06	6.27521e-06
1167	1.02326e-05	3.8527e-06	7.04266e-06
1168	1.02326e-05	3.8527e-06	7.04266e-06
1169	8.18609e-06	1.2842e-06	4.73516e-06
1170	9.61865e-06	1.2842e-06	5.45144e-06
1171	9.414e-06	1.2842e-06	5.34912e-06
1172	9.414e-06	1.2842e-06	5.34912e-06
1173	1.02326e-05	2.5685e-06	6.40054e-06
1174	1.07442e-05	2.5685e-06	6.65635e-06
1175	1.06419e-05	2.5685e-06	6.60519e-06
1176	9.20935e-06	2.5685e-06	5.88891e-06
1177	1.02326e-05	2.5685e-06	6.40054e-06
1178	1.02326e-05	2.5685e-06	6.40054e-06
1179	1.02326e-05	2.5685e-06	6.40054e-06
1180	1.02326e-05	2.5685e-06	6.40054e-06
1181	1.02326e-05	2.5685e-06	6.40054e-06
1182	8.69772e-06	2.5685e-06	5.63309e-06
1183	8.69772e-06	2.5685e-06	5.63309e-06
1184	8.69772e-06	2.5685e-06	5.63309e-06
1185	8.69772e-06	2.5685e-06	5.63309e-06
1186	6.44654e-06	2.5685e-06	4.50751e-06
1187	6.65119e-06	2.5685e-06	4.60983e-06
1188	6.65119e-06	2.5685e-06	4.60983e-06
1189	6.65119e-06	2.5685e-06	4.60983e-06
1190	6.54887e-06	2.5685e-06	4.55867e-06
1191	5.62793e-06	2.5685e-06	4.0982e-06
1192	5.73026e-06	2.5685e-06	4.14936e-06
1193	5.52561e-06	2.5685e-06	4.04704e-06
1194	5.52561e-06	2.5685e-06	4.04704e-06
1195	3.47909e-06	2.5685e-06	3.02378e-06
1196	3.58141e-06	1.2842e-06	2.43282e-06
1197	3.47909e-06	1.2842e-06	2.38166e-06
1198	1.02326e-06	1.2842e-06	1.15375e-06
1199	9.20935e-07	0	4.60467e-07
1200	7.16283e-07	0	3.58141e-07
1201	1.02326e-06	0	5.1163e-07
1202	1.43257e-06	0	7.16283e-07
1203	4.60467e-06	0	2.30234e-06
1204	4.80933e-06	0	2.40466e-06
1205	4.80933e-06	0	2.40466e-06
1206	4.80933e-06	0	2.40466e-06
1207	4.707e-06	0	2.3535e-06
1208	5.1163e-06	0	2.55815e-06
1209	5.1163e-06	0	2.55815e-06
1210	5.1163e-06	0	2.55815e-06
1211	5.21863e-06	0	2.60931e-06
1212	5.42328e-06	0	2.71164e-06
1213	5.42328e-06	0	2.71164e-06
1214	5.42328e-06	0	2.71164e-06
1215	5.42328e-06	0	2.71164e-06
1216	5.32096e-06	0	2.66048e-06
1217	5.52561e-06	0	2.7628e-06
1218	5.52561e-06	0	2.7628e-06
1219	5.52561e-06	0	2.7628e-06
1220	2.83443e-05	0	1.41722e-05
1221	2.87536e-05	0	1.43768e-05
1222	2.89583e-05	0	1.44791e-05
1223	2.94699e-05	1.2842e-06	1.53771e-05
1224	2.91629e-05	1.2842e-06	1.52236e-05
1225	2.92653e-05	1.2842e-06	1.52747e-05
1226	2.95722e-05	1.2842e-06	1.54282e-05
1227	2.95722e-05	1.2842e-06	1.54282e-05
1228	2.71164e-05	1.2842e-06	1.42003e-05
1229	2.67071e-05	1.2842e-06	1.39957e-05
1230	2.60931e-05	1.2842e-06	1.36887e-05
1231	2.62978e-05	2.5685e-06	1.44331e-05
1232	2.65025e-05	2.5685e-06	1.45355e-05
1233	4.80933e-05	7.7054e-06	2.78993e-05
1234	4.95258e-05	7.7054e-06	2.86156e-05
1235	5.08561e-05	7.7054e-06	2.92807e-05
1236	5.147e-05	7.7054e-06	2.95877e-05
1237	5.147e-05	7.7054e-06	2.95877e-05
1238	5.147e-05	7.7054e-06	2.95877e-05
1239	4.58421e-05	7.7054e-06	2.67737e-05
1240	4.61491e-05	7.7054e-06	2.69272e-05
1241	4.59444e-05	7.7054e-06	2.68249e-05
1242	4.53305e-05	7.7054e-06	2.65179e-05
1243	3.61211e-05	6.4212e-06	2.12711e-05
1244	3.7042e-05	6.4212e-06	2.17316e-05
1245	3.71444e-05	6.4212e-06	2.17828e-05
1246	3.71444e-05	6.4212e-06	2.17828e-05
1247	3.71444e-05	6.4212e-06	2.17828e-05
1248	3.71444e-05	6.4212e-06	2.17828e-05
1249	3.60188e-05	6.4212e-06	2.122e-05
1250	3.50978e-05	6.4212e-06	2.07595e-05
1251	3.50978e-05	6.4212e-06	2.07595e-05
1252	3.38699e-05	6.4212e-06	2.01456e-05
1253	3.34606e-05	6.4212e-06	1.99409e-05
1254	3.00839e-05	3.8527e-06	1.69683e-05
1255	3.37676e-06	1.2842e-06	2.3305e-06
1256	3.37676e-06	0	1.68838e-06
1257	3.37676e-06	0	1.68838e-06
1258	3.17211e-06	0	1.58605e-06
1259	2.04652e-06	0	1.02326e-06
1260	2.55815e-06	3.8527e-06	3.20543e-06
1261	2.55815e-06	3.8527e-06	3.20543e-06
1262	2.55815e-06	3.8527e-06	3.20543e-06
1263	2.14885e-06	3.8527e-06	3.00078e-06
1264	1.84187e-06	3.8527e-06	2.84729e-06
1265	2.25117e-06	5.1369e-06	3.69406e-06
1266	2.25117e-06	5.1369e-06	3.69406e-06
1267	1.9442e-06	5.1369e-06	3.54057e-06
1268	2.55815e-06	5.1369e-06	3.84754e-06
1269	2.55815e-06	5.1369e-06	3.84754e-06
1270	2.55815e-06	5.1369e-06	3.84754e-06
1271	2.55815e-06	5.1369e-06	3.84754e-06
1272	2.55815e-06	5.1369e-06	3.84754e-06
1273	2.55815e-06	5.1369e-06	3.84754e-06
1274	2.66048e-06	5.1369e-06	3.89871e-06
1275	2.66048e-06	5.1369e-06	3.89871e-06
1276	3.06978e-06	5.1369e-06	4.10336e-06
1277	3.06978e-06	5.1369e-06	4.10336e-06
1278	4.50235e-06	6.4212e-06	5.46176e-06
1279	4.60467e-06	6.4212e-06	5.51292e-06
1280	4.707e-06	6.4212e-06	5.56409e-06
1281	4.60467e-06	6.4212e-06	5.51292e-06
1282	4.60467e-06	6.4212e-06	5.51292e-06
1283	4.50235e-06	6.4212e-06	5.46176e-06
1284	4.60467e-06	6.4212e-06	5.51292e-06
1285	4.2977e-06	6.4212e-06	5.35943e-06
1286	4.40002e-06	5.1369e-06	4.76848e-06
1287	3.33583e-05	3.7243e-05	3.53006e-05
1288	3.3563e-05	3.7243e-05	3.54029e-05
1289	3.31536e-05	3.8527e-05	3.58403e-05
1290	3.48932e-05	3.9811e-05	3.73522e-05
1291	3.49955e-05	3.9811e-05	3.74034e-05
1292	3.52002e-05	3.9811e-05	3.75057e-05
1293	3.52002e-05	4.1096e-05	3.81478e-05
1294	3.55071e-05	4.1096e-05	3.83013e-05
1295	3.60188e-05	4.1096e-05	3.85571e-05
1296	3.60188e-05	4.1096e-05	3.85571e-05
1297	3.61211e-05	4.1096e-05	3.86083e-05
1298	3.48932e-05	4.1096e-05	3.79943e-05
1299	3.827e-05	4.4948e-05	4.16091e-05
1300	3.88839e-05	4.6232e-05	4.25582e-05
1301	4.25676e-05	5.1369e-05	4.69685e-05
1302	4.267e-05	5.1369e-05	4.70197e-05
1303	4.267e-05	5.1369e-05	4.70197e-05
1304	4.267e-05	5.1369e-05	4.70197e-05
1305	4.22607e-05	5.0085e-05	4.61729e-05
1306	6.67166e-05	0.00010145	8.40856e-05
1307	6.74329e-05	0.00010145	8.44437e-05
1308	6.74329e-05	0.00010145	8.44437e-05
1309	6.68189e-05	0.00010145	8.41367e-05
1310	6.51817e-05	9.8886e-05	8.20339e-05
1311	4.63537e-05	7.7054e-05	6.17039e-05
1312	4.30793e-05	7.0633e-05	5.68561e-05
1313	5.74049e-05	7.0633e-05	6.40189e-05
1314	5.74049e-05	7.0633e-05	6.40189e-05
1315	5.74049e-05	7.0633e-05	6.40189e-05
1316	5.74049e-05	7.0633e-05	6.40189e-05
1317	5.74049e-05	7.0633e-05	6.40189e-05
1318	5.73026e-05	7.0633e-05	6.39677e-05
1319	5.73026e-05	7.0633e-05	6.39677e-05
1320	5.68933e-05	7.0633e-05	6.37631e-05
1321	5.48468e-05	6.9349e-05	6.20977e-05
1322	5.24933e-05	6.4212e-05	5.83525e-05
1323	4.88095e-05	5.7791e-05	5.33e-05
1324	4.77863e-05	5.6506e-05	5.21463e-05
1325	4.09304e-05	4.7517e-05	4.42236e-05
1326	4.1749e-05	4.8801e-05	4.5275e-05
1327	3.89862e-05	4.238e-05	4.0683e-05
1328	3.87816e-05	4.238e-05	4.05807e-05
1329	3.77583e-05	4.238e-05	4.0069e-05
1330	3.72467e-05	4.238e-05	3.98132e-05
1331	2.67071e-05	3.0822e-05	2.87644e-05
1332	8.49306e-06	1.5411e-05	1.19519e-05
1333	8.49306e-06	1.5411e-05	1.19519e-05
1334	7.57213e-06	1.2842e-05	1.02072e-05
1335	7.57213e-06	1.2842e-05	1.02072e-05
1336	5.83259e-06	7.7054e-06	6.769e-06
1337	6.44654e-06	7.7054e-06	7.07597e-06
1338	6.54887e-06	7.7054e-06	7.12714e-06
1339	6.54887e-06	7.7054e-06	7.12714e-06
1340	6.24189e-06	2.5685e-06	4.40518e-06
1341	5.21863e-06	1.2842e-06	3.25143e-06
1342	5.32096e-06	1.2842e-06	3.3026e-06
1343	5.32096e-06	1.2842e-06	3.3026e-06
1344	5.21863e-06	1.2842e-06	3.25143e-06
1345	4.09304e-06	1.2842e-06	2.68864e-06
1346	3.99072e-06	1.2842e-06	2.63748e-06
1347	2.3535e-06	0	1.17675e-06
1348	3.06978e-06	0	1.53489e-06
1349	4.707e-06	0	2.3535e-06
1350	7.67446e-06	0	3.83723e-06
1351	7.87911e-06	0	3.93955e-06
1352	7.98143e-06	0	3.99072e-06
1353	8.08376e-06	0	4.04188e-06
1354	7.98143e-06	0	3.99072e-06
1355	8.18609e-06	0	4.09304e-06
1356	9.92563e-06	0	4.96281e-06
1357	1.11535e-05	0	5.57677e-06
1358	1.4428e-05	1.1558e-05	1.2993e-05
1359	1.45303e-05	1.1558e-05	1.30442e-05
1360	1.45303e-05	1.1558e-05	1.30442e-05
1361	1.4735e-05	1.1558e-05	1.31465e-05
1362	1.4735e-05	1.1558e-05	1.31465e-05
1363	1.46326e-05	1.1558e-05	1.30954e-05
1364	1.4735e-05	1.1558e-05	1.31465e-05
1365	1.46326e-05	1.1558e-05	1.30954e-05
1366	1.46326e-05	1.1558e-05	1.30954e-05
1367	1.46326e-05	1.1558e-05	1.30954e-05
1368	1.22791e-05	1.1558e-05	1.19186e-05
1369	1.29954e-05	1.1558e-05	1.22768e-05
1370	1.29954e-05	1.1558e-05	1.22768e-05
1371	1.28931e-05	1.1558e-05	1.22256e-05
1372	1.22791e-05	1.1558e-05	1.19186e-05
1373	1.23815e-05	1.1558e-05	1.19698e-05
1374	1.20745e-05	1.1558e-05	1.18163e-05
1375	9.8233e-06	1.1558e-05	1.06907e-05
1376	1.01303e-05	1.1558e-05	1.08442e-05
1377	8.49306e-06	1.1558e-05	1.00256e-05
1378	1.68838e-05	2.9537e-05	2.32106e-05
1379	1.76001e-05	2.9537e-05	2.35687e-05
1380	1.73954e-05	2.9537e-05	2.34664e-05
1381	1.73954e-05	2.9537e-05	2.34664e-05
1382	1.72931e-05	2.9537e-05	2.34152e-05
1383	1.68838e-05	2.9537e-05	2.32106e-05
1384	1.4428e-05	2.9537e-05	2.19827e-05
1385	3.06978e-05	3.339e-05	3.2044e-05
1386	3.31536e-05	3.339e-05	3.32719e-05
1387	3.33583e-05	3.339e-05	3.33742e-05
1388	3.39723e-05	3.339e-05	3.36812e-05
1389	3.41769e-05	3.339e-05	3.37835e-05
1390	3.43816e-05	3.339e-05	3.38858e-05
1391	3.42792e-05	3.339e-05	3.38347e-05
1392	3.43816e-05	3.339e-05	3.38858e-05
1393	3.57118e-05	3.5959e-05	3.58352e-05
1394	3.61211e-05	3.5959e-05	3.60398e-05
1395	3.64281e-05	3.7243e-05	3.68354e-05
1396	3.61211e-05	3.7243e-05	3.6682e-05
1397	3.64281e-05	3.9811e-05	3.81197e-05
1398	3.62234e-05	3.9811e-05	3.80173e-05
1399	3.22327e-05	3.0822e-05	3.15272e-05
1400	4.99351e-05	5.2654e-05	5.12944e-05
1401	5.03444e-05	5.2654e-05	5.1499e-05
1402	5.06514e-05	5.3938e-05	5.22946e-05
1403	5.08561e-05	5.2654e-05	5.17548e-05
1404	5.03444e-05	5.2654e-05	5.1499e-05
1405	4.16467e-05	3.9811e-05	4.0729e-05
1406	4.87072e-05	5.9075e-05	5.3891e-05
1407	5.25956e-05	6.5496e-05	5.90458e-05
1408	5.65863e-05	6.678e-05	6.16833e-05
1409	6.35445e-05	6.9349e-05	6.64466e-05
1410	6.53864e-05	6.9349e-05	6.73675e-05
1411	6.56933e-05	6.9349e-05	6.7521e-05
1412	6.61026e-05	6.9349e-05	6.77257e-05
1413	6.6205e-05	6.9349e-05	6.77768e-05
1414	6.53864e-05	6.8064e-05	6.67254e-05
1415	6.40561e-05	6.2927e-05	6.34918e-05
1416	5.94515e-05	5.6506e-05	5.79789e-05
1417	6.34422e-05	5.7791e-05	6.06164e-05
1418	6.35445e-05	5.7791e-05	6.06675e-05
1419	6.30329e-05	5.6506e-05	5.97696e-05
1420	6.26236e-05	5.6506e-05	5.95649e-05
1421	5.6177e-05	5.3938e-05	5.50574e-05
1422	5.86328e-05	5.5222e-05	5.69275e-05
1423	5.72003e-05	5.2654e-05	5.49269e-05
1424	5.72003e-05	5.2654e-05	5.49269e-05
1425	5.66886e-05	5.2654e-05	5.46711e-05
1426	5.6177e-05	5.2654e-05	5.44153e-05
1427	4.16467e-05	2.9537e-05	3.55921e-05
1428	3.80653e-05	2.6969e-05	3.25171e-05
1429	2.34327e-05	1.9264e-05	2.13481e-05
1430	2.39443e-05	2.1832e-05	2.28881e-05
1431	2.3842e-05	2.1832e-05	2.2837e-05
1432	2.3842e-05	2.1832e-05	2.2837e-05
1433	2.14885e-05	1.9264e-05	2.0376e-05
1434	1.60652e-05	1.1558e-05	1.38117e-05
1435	1.57582e-05	1.1558e-05	1.36582e-05
1436	9.51633e-06	3.8527e-06	6.68451e-06
1437	1.02326e-05	6.4212e-06	8.32689e-06
1438	1.03349e-05	6.4212e-06	8.37805e-06
1439	1.02326e-05	6.4212e-06	8.32689e-06
1440	1.03349e-05	6.4212e-06	8.37805e-06
1441	8.08376e-06	6.4212e-06	7.25247e-06
1442	2.86513e-06	6.4212e-06	4.64315e-06
1443	6.85585e-06	1.9264e-05	1.30597e-05
1444	7.26515e-06	2.0548e-05	1.39065e-05
1445	8.28841e-06	2.6969e-05	1.76287e-05
1446	9.20935e-06	3.339e-05	2.12997e-05
1447	9.72098e-06	3.4674e-05	2.21977e-05
1448	2.97769e-05	9.5033e-05	6.24051e-05
1449	3.09025e-05	9.6318e-05	6.361e-05
1450	3.08001e-05	9.6318e-05	6.35589e-05
1451	3.09025e-05	9.6318e-05	6.361e-05
1452	3.11071e-05	9.6318e-05	6.37124e-05
1453	3.09025e-05	9.6318e-05	6.361e-05
1454	6.5898e-05	0.00015026	0.000108077
1455	7.07073e-05	0.00015282	0.000111766
1456	7.77678e-05	0.00015668	0.000117222
1457	9.07632e-05	0.00016823	0.000129499
1458	9.22981e-05	0.00016823	0.000130266
1459	9.26051e-05	0.00016823	0.00013042
1460	9.39353e-05	0.00016823	0.000131085
1461	9.36284e-05	0.00016823	0.000130932
1462	9.42423e-05	0.00016823	0.000131239
1463	0.000115833	0.00017722	0.000146529
1464	0.000116345	0.00017722	0.000146785
1465	0.000115833	0.00017466	0.000145245
1466	0.000115833	0.00017466	0.000145245
1467	0.00011481	0.00017466	0.000144733
1468	0.000106521	0.0001631	0.00013481
1469	0.000106521	0.0001631	0.00013481
1470	0.000106112	0.00016053	0.000133321
1471	9.90516e-05	0.00013741	0.000118232
1472	0.000103247	0.00013741	0.00012033
1473	9.47539e-05	0.00012457	0.000109662
1474	8.12469e-05	0.00011301	9.71298e-05
1475	0.000112866	0.00013099	0.000121929
1476	0.000113991	0.00013099	0.000122492
1477	0.000112559	0.00013099	0.000121775
1478	0.000112354	0.00013099	0.000121673
1479	0.000110512	0.00013099	0.000120752
1480	0.000110614	0.00013099	0.000120803
1481	0.000110205	0.00013099	0.000120599
1482	0.000108773	0.00012971	0.00011924
1483	7.80748e-05	7.577e-05	7.69223e-05
1484	8.89214e-05	0.00010531	9.71143e-05
1485	9.26051e-05	0.00010788	0.00010024
1486	8.51353e-05	9.7602e-05	9.13686e-05
1487	8.90237e-05	0.00010531	9.71655e-05
1488	8.87167e-05	0.00010402	9.63699e-05
1489	7.59259e-05	8.2191e-05	7.90585e-05
1490	9.34237e-05	9.7602e-05	9.55128e-05
1491	9.32191e-05	9.7602e-05	9.54104e-05
1492	8.70795e-05	8.0907e-05	8.39931e-05
1493	0.000119517	0.00011173	0.000115623
1494	0.00012361	0.00011558	0.000119596
1495	0.000128726	0.00011687	0.000122796
1496	0.000130056	0.00011687	0.000123461
1497	0.000129442	0.00011687	0.000123154
1498	0.000161778	0.00011943	0.000140606
1499	0.000163619	0.00011943	0.000141527
1500	0.000164336	0.00011943	0.000141885
1501	0.000164233	0.00011815	0.000141191
1502	0.000164336	0.00011815	0.000141243
1503	0.000163926	0.00011815	0.000141038
1504	0.000160243	0.00011044	0.000135343
1505	0.000163415	0.00011044	0.000136929
1506	0.000163926	0.00011044	0.000137185
1507	0.000163926	0.00011044	0.000137185
1508	0.000162903	0.00010916	0.000136032
1509	0.000162903	0.00010916	0.000136032
1510	0.000162391	0.00010916	0.000135776
1511	0.000161675	0.00010916	0.000135418
1512	0.000150317	0.00010531	0.000127812
1513	0.00013988	0.00010017	0.000120025
1514	0.000128112	9.1181e-05	0.000109646
1515	0.000127908	9.1181e-05	0.000109544
1516	0.000126066	8.7328e-05	0.000106697
1517	9.25028e-05	4.8801e-05	7.06518e-05
1518	5.54607e-05	2.3116e-05	3.92885e-05
1519	5.55631e-05	2.3116e-05	3.93396e-05
1520	4.00095e-05	2.1832e-05	3.09207e-05
1521	4.94235e-05	3.9811e-05	4.46174e-05
1522	4.72746e-05	3.5959e-05	4.16166e-05
1523	4.48188e-05	3.5959e-05	4.03887e-05
1524	4.36932e-05	3.5959e-05	3.98259e-05
1525	2.78327e-05	2.5685e-05	2.67587e-05
1526	3.69397e-05	3.0822e-05	3.38807e-05
1527	3.75537e-05	3.0822e-05	3.41876e-05
1528	3.7349e-05	3.0822e-05	3.40853e-05
1529	3.74513e-05	3.0822e-05	3.41365e-05
1530	3.7656e-05	3.0822e-05	3.42388e-05
1531	3.75537e-05	3.0822e-05	3.41876e-05
1532	3.80653e-05	3.0822e-05	3.44435e-05
1533	3.83723e-05	3.0822e-05	3.4597e-05
1534	3.86793e-05	3.0822e-05	3.47504e-05
1535	3.86793e-05	3.0822e-05	3.47504e-05
1536	3.87816e-05	3.0822e-05	3.48016e-05
1537	3.87816e-05	3.0822e-05	3.48016e-05
1538	3.86793e-05	3.0822e-05	3.47504e-05
1539	3.87816e-05	3.0822e-05	3.48016e-05
1540	3.57118e-05	2.8253e-05	3.19825e-05
1541	3.57118e-05	2.8253e-05	3.19825e-05
1542	3.30513e-05	2.5685e-05	2.9368e-05
1543	1.3814e-05	1.2842e-05	1.33282e-05
1544	1.58605e-05	1.2842e-05	1.43514e-05
1545	1.61675e-05	1.2842e-05	1.45049e-05
1546	1.54512e-05	1.2842e-05	1.41468e-05
1547	1.56559e-05	1.1558e-05	1.3607e-05
1548	1.56559e-05	1.1558e-05	1.3607e-05
1549	1.54512e-05	1.1558e-05	1.35047e-05
1550	1.50419e-05	1.1558e-05	1.33e-05
1551	1.29954e-05	8.9896e-06	1.09925e-05
1552	1.18698e-05	7.7054e-06	9.78762e-06
1553	1.18698e-05	6.4212e-06	9.1455e-06
1554	1.14605e-05	6.4212e-06	8.94085e-06
1555	4.50235e-06	1.2842e-06	2.89329e-06
1556	4.80933e-06	0	2.40466e-06
1557	4.80933e-06	0	2.40466e-06
1558	4.09304e-06	0	2.04652e-06
1559	5.52561e-06	0	2.7628e-06
1560	5.52561e-06	0	2.7628e-06
1561	5.52561e-06	0	2.7628e-06
1562	5.52561e-06	0	2.7628e-06
1563	5.21863e-06	0	2.60931e-06
1564	4.707e-06	0	2.3535e-06
1565	4.91165e-06	1.2842e-06	3.09794e-06
1566	4.80933e-06	1.2842e-06	3.04678e-06
1567	4.707e-06	1.2842e-06	2.99562e-06
1568	4.50235e-06	1.2842e-06	2.89329e-06
1569	4.50235e-06	1.2842e-06	2.89329e-06
1570	4.09304e-06	1.2842e-06	2.68864e-06
1571	3.37676e-06	1.2842e-06	2.3305e-06
1572	3.58141e-06	1.2842e-06	2.43282e-06
1573	3.27443e-06	1.2842e-06	2.27933e-06
1574	4.91165e-06	3.8527e-06	4.38218e-06
1575	5.21863e-06	3.8527e-06	4.53567e-06
1576	5.1163e-06	3.8527e-06	4.4845e-06
1577	6.03724e-06	3.8527e-06	4.94497e-06
1578	6.34422e-06	3.8527e-06	5.09846e-06
1579	5.42328e-06	3.8527e-06	4.63799e-06
1580	6.85585e-06	6.4212e-06	6.63851e-06
1581	6.75352e-06	6.4212e-06	6.58735e-06
1582	2.13861e-05	1.7979e-05	1.96827e-05
1583	2.14885e-05	1.7979e-05	1.97339e-05
1584	2.20001e-05	1.9264e-05	2.06318e-05
1585	2.23071e-05	1.9264e-05	2.07853e-05
1586	2.23071e-05	1.9264e-05	2.07853e-05
1587	2.25117e-05	1.9264e-05	2.08876e-05
1588	2.25117e-05	1.9264e-05	2.08876e-05
1589	2.21024e-05	1.7979e-05	2.00409e-05
1590	3.60188e-05	4.4948e-05	4.04835e-05
1591	4.18514e-05	4.8801e-05	4.53261e-05
1592	4.33863e-05	4.8801e-05	4.60936e-05
1593	4.54328e-05	4.8801e-05	4.71168e-05
1594	4.6456e-05	4.8801e-05	4.76285e-05
1595	4.68653e-05	4.8801e-05	4.78331e-05
1596	7.78701e-05	7.577e-05	7.682e-05
1597	7.88934e-05	7.577e-05	7.73316e-05
1598	7.90981e-05	7.577e-05	7.74339e-05
1599	7.92004e-05	7.577e-05	7.74851e-05
1600	7.93027e-05	7.577e-05	7.75363e-05
1601	7.76655e-05	7.577e-05	7.67177e-05
1602	7.61306e-05	7.7054e-05	7.65923e-05
1603	0.000135173	0.00020805	0.000171609
1604	0.00013548	0.00020805	0.000171763
1605	0.000135684	0.00020805	0.000171865
1606	0.000135787	0.00020805	0.000171916
1607	0.000136298	0.00020805	0.000172172
1608	0.00013548	0.00020805	0.000171763
1609	0.000135582	0.00020805	0.000171814
1610	0.000135377	0.00020805	0.000171712
1611	0.00013507	0.00020805	0.000171558
1612	0.000125554	0.00019777	0.000161663
1613	0.00012361	0.00020162	0.000162617
1614	0.000154512	0.00026455	0.000209532
1615	0.000157378	0.00027739	0.000217386
1616	0.000162698	0.00027739	0.000220047
1617	0.000164847	0.00027611	0.000220479
1618	0.000162801	0.00027611	0.000219456
1619	0.000162801	0.00028125	0.000222024
1620	0.000159731	0.00028125	0.000220489
1621	0.000156661	0.00027868	0.00021767
1622	0.000113582	0.00025299	0.000183288
1623	0.000222048	0.00067294	0.000447493
1624	0.000226959	0.00068578	0.00045637
1625	0.000232689	0.00069349	0.000463088
1626	0.000235964	0.00069862	0.000467294
1627	0.000236169	0.00069862	0.000467396
1628	0.000236578	0.00069862	0.000467601
1629	0.000236783	0.00069991	0.000468345
1630	0.000236987	0.00069991	0.000468447
1631	0.000236987	0.00069991	0.000468447
1632	0.00023709	0.00069991	0.000468499
1633	0.000237396	0.00069991	0.000468652
1634	0.000236885	0.00069991	0.000468396
1635	0.000234429	0.00070119	0.000467811
1636	0.000249266	0.00070376	0.000476513
1637	0.000245173	0.0006922	0.000468688
1638	0.000250801	0.00069349	0.000472144
1639	0.000271778	0.00069734	0.000484559
1640	0.000280271	0.00069991	0.000490089
1641	0.000281601	0.00069991	0.000490755
1642	0.000279248	0.00069477	0.000487009
1643	0.000277406	0.00069477	0.000486088
1644	0.000226448	0.00060102	0.000413735
1645	0.000231155	0.00059588	0.00041352
1646	0.000214782	0.00056892	0.000391849
1647	0.000221843	0.00057405	0.000397948
1648	0.000222355	0.00057405	0.000398204
1649	0.000222252	0.00057405	0.000398153
1650	0.000220717	0.00057405	0.000397385
1651	0.000220206	0.00057148	0.000395845
1652	0.000220103	0.00057148	0.000395794
1653	0.000218978	0.00057148	0.000395231
1654	0.00021642	0.00056378	0.000390099
1655	0.000212941	0.0005458	0.00037937
1656	0.000212736	0.0005458	0.000379268
1657	0.000209257	0.00053681	0.000373033
1658	0.000202401	0.00052011	0.000361258
1659	7.63353e-05	0.0001143	9.53161e-05
1660	7.59259e-05	0.00011558	9.57535e-05
1661	6.44654e-05	0.00010659	8.55284e-05
1662	3.83723e-05	4.7517e-05	4.29445e-05
1663	4.46142e-05	6.1643e-05	5.31287e-05
1664	4.54328e-05	6.1643e-05	5.3538e-05
1665	4.56374e-05	6.1643e-05	5.36403e-05
1666	3.54048e-05	5.3938e-05	4.46713e-05
1667	5.46421e-05	7.4486e-05	6.45639e-05
1668	5.55631e-05	7.577e-05	6.56664e-05
1669	5.07537e-05	6.8064e-05	5.94091e-05
1670	5.07537e-05	6.8064e-05	5.94091e-05
1671	5.01398e-05	6.8064e-05	5.91021e-05
1672	5.01398e-05	6.8064e-05	5.91021e-05
1673	4.71723e-05	6.678e-05	5.69763e-05
1674	4.12374e-05	4.6232e-05	4.37349e-05
1675	4.07258e-05	4.6232e-05	4.34791e-05
1676	3.58141e-05	4.4948e-05	4.03812e-05
1677	4.10328e-05	5.5222e-05	4.81274e-05
1678	4.21583e-05	5.5222e-05	4.86902e-05
1679	4.28746e-05	5.3938e-05	4.84062e-05
1680	5.12654e-05	5.5222e-05	5.32437e-05
1681	5.19816e-05	5.6506e-05	5.4244e-05
1682	5.10607e-05	5.6506e-05	5.37835e-05
1683	5.1163e-05	5.6506e-05	5.38347e-05
1684	5.1163e-05	5.6506e-05	5.38347e-05
1685	5.10607e-05	5.6506e-05	5.37835e-05
1686	3.7963e-05	4.3664e-05	4.08135e-05
1687	4.06235e-05	4.3664e-05	4.21437e-05
1688	4.07258e-05	4.3664e-05	4.21949e-05
1689	4.04188e-05	4.1096e-05	4.07572e-05
1690	3.72467e-05	3.5959e-05	3.66026e-05
1691	2.49676e-05	2.3116e-05	2.40419e-05
1692	4.56374e-05	2.5685e-05	3.56611e-05
1693	5.35165e-05	2.8253e-05	4.08848e-05
1694	5.55631e-05	2.8253e-05	4.19081e-05
1695	6.00654e-05	2.8253e-05	4.41593e-05
1696	6.37491e-05	2.8253e-05	4.60012e-05
1697	6.73306e-05	2.8253e-05	4.77919e-05
1698	6.95817e-05	2.8253e-05	4.89174e-05
1699	6.6205e-05	1.9264e-05	4.27342e-05
1700	7.90981e-05	1.9264e-05	4.91808e-05
1701	8.07353e-05	1.9264e-05	4.99994e-05
1702	8.26795e-05	1.9264e-05	5.09715e-05
1703	8.26795e-05	1.9264e-05	5.09715e-05
1704	8.26795e-05	1.9264e-05	5.09715e-05
1705	8.26795e-05	1.9264e-05	5.09715e-05
1706	8.24748e-05	1.9264e-05	5.08692e-05
1707	8.24748e-05	1.9264e-05	5.08692e-05
1708	8.23725e-05	1.7979e-05	5.01759e-05
1709	8.22702e-05	1.7979e-05	5.01247e-05
1710	8.21678e-05	1.7979e-05	5.00736e-05
1711	8.21678e-05	1.7979e-05	5.00736e-05
1712	8.21678e-05	1.7979e-05	5.00736e-05
1713	8.20655e-05	1.7979e-05	5.00224e-05
1714	8.20655e-05	1.7979e-05	5.00224e-05
1715	8.20655e-05	1.7979e-05	5.00224e-05
1716	8.19632e-05	1.7979e-05	4.99712e-05
1717	8.18609e-05	1.7979e-05	4.99201e-05
1718	8.16562e-05	1.7979e-05	4.98177e-05
1719	7.73585e-05	1.1558e-05	4.44583e-05
1720	7.26515e-05	1.1558e-05	4.21048e-05
1721	4.09304e-07	1.2842e-06	8.46769e-07
1722	8.04283e-05	6.4212e-05	7.232e-05
1723	8.22702e-05	6.4212e-05	7.32409e-05
1724	8.27818e-05	6.4212e-05	7.34968e-05
1725	8.36004e-05	6.5496e-05	7.45482e-05
1726	8.37027e-05	6.5496e-05	7.45993e-05
1727	8.37027e-05	6.5496e-05	7.45993e-05
1728	8.37027e-05	6.5496e-05	7.45993e-05
1729	8.38051e-05	6.5496e-05	7.46505e-05
1730	8.38051e-05	6.5496e-05	7.46505e-05
1731	8.38051e-05	6.5496e-05	7.46505e-05
1732	8.38051e-05	6.5496e-05	7.46505e-05
1733	8.39074e-05	6.5496e-05	7.47017e-05
1734	8.39074e-05	6.5496e-05	7.47017e-05
1735	8.39074e-05	6.5496e-05	7.47017e-05
1736	8.39074e-05	6.5496e-05	7.47017e-05
1737	8.39074e-05	6.5496e-05	7.47017e-05
1738	8.39074e-05	6.5496e-05	7.47017e-05
1739	8.39074e-05	6.5496e-05	7.47017e-05
1740	8.42144e-05	6.5496e-05	7.48552e-05
1741	8.32934e-05	6.5496e-05	7.43947e-05
1742	7.88934e-05	6.4212e-05	7.15526e-05
1743	7.67446e-05	6.2927e-05	6.9836e-05
1744	7.26515e-05	6.0359e-05	6.65053e-05
1745	5.68933e-05	5.0085e-05	5.34892e-05
1746	2.97769e-05	4.4948e-05	3.73625e-05
1747	4.43072e-05	4.4948e-05	4.46277e-05
1748	4.27723e-05	4.1096e-05	4.19339e-05
1749	4.32839e-05	4.1096e-05	4.21897e-05
1750	4.21583e-05	3.8527e-05	4.03427e-05
1751	2.75257e-05	2.6969e-05	2.72473e-05
1752	3.42792e-05	2.5685e-05	2.9982e-05
1753	3.43816e-05	2.5685e-05	3.00331e-05
1754	3.45862e-05	2.5685e-05	3.01355e-05
1755	3.2335e-05	1.4127e-05	2.32308e-05
1756	2.89583e-05	2.5685e-06	1.57634e-05
1757	3.84746e-05	2.5685e-06	2.05215e-05
1758	3.87816e-05	2.5685e-06	2.0675e-05
1759	3.89862e-05	2.5685e-06	2.07774e-05
1760	3.89862e-05	2.5685e-06	2.07774e-05
1761	3.85769e-05	2.5685e-06	2.05727e-05
1762	3.81676e-05	2.5685e-06	2.0368e-05
1763	3.91909e-05	2.5685e-06	2.08797e-05
1764	3.91909e-05	2.5685e-06	2.08797e-05
1765	3.69397e-05	2.5685e-06	1.97541e-05
1766	4.55351e-05	2.5685e-06	2.40518e-05
1767	4.57398e-05	2.5685e-06	2.41541e-05
1768	4.61491e-05	1.2842e-06	2.37166e-05
1769	4.6763e-05	1.2842e-06	2.40236e-05
1770	4.66607e-05	1.2842e-06	2.39725e-05
1771	4.52281e-05	1.2842e-06	2.32562e-05
1772	4.7377e-05	1.2842e-06	2.43306e-05
1773	4.75816e-05	1.2842e-06	2.44329e-05
1774	4.38979e-05	1.2842e-06	2.25911e-05
1775	6.96841e-05	1.7979e-05	4.38317e-05
1776	7.05027e-05	1.7979e-05	4.4241e-05
1777	7.16283e-05	1.7979e-05	4.48038e-05
1778	7.21399e-05	1.7979e-05	4.50596e-05
1779	7.25492e-05	1.7979e-05	4.52642e-05
1780	7.28562e-05	1.7979e-05	4.54177e-05
1781	7.28562e-05	1.7979e-05	4.54177e-05
1782	7.34701e-05	1.7979e-05	4.57247e-05
1783	7.33678e-05	1.7979e-05	4.56735e-05
1784	7.43911e-05	1.7979e-05	4.61852e-05
1785	7.5005e-05	1.7979e-05	4.64921e-05
1786	7.4698e-05	1.7979e-05	4.63387e-05
1787	7.36748e-05	1.7979e-05	4.5827e-05
1788	7.51073e-05	1.7979e-05	4.65433e-05
1789	7.5312e-05	1.7979e-05	4.66456e-05
1790	7.5312e-05	1.7979e-05	4.66456e-05
1791	7.52097e-05	1.7979e-05	4.65945e-05
1792	7.52097e-05	1.7979e-05	4.65945e-05
1793	7.5005e-05	1.7979e-05	4.64921e-05
1794	7.5005e-05	1.7979e-05	4.64921e-05
1795	7.5005e-05	1.7979e-05	4.64921e-05
1796	7.4698e-05	1.7979e-05	4.63387e-05
1797	7.41864e-05	1.7979e-05	4.60828e-05
1798	7.38794e-05	1.6695e-05	4.52872e-05
1799	7.38794e-05	1.6695e-05	4.52872e-05
1800	6.92748e-05	1.5411e-05	4.23428e-05
1801	6.92748e-05	1.5411e-05	4.23428e-05
1802	6.69213e-05	1.5411e-05	4.1166e-05
1803	6.25212e-05	1.4127e-05	3.83239e-05
1804	8.49306e-06	1.2842e-06	4.88865e-06
1805	9.92563e-06	0	4.96281e-06
1806	9.8233e-06	0	4.91165e-06
1807	7.98143e-06	0	3.99072e-06
1808	1.3814e-05	5.1369e-06	9.47548e-06
1809	1.48373e-05	5.1369e-06	9.98711e-06
1810	1.46326e-05	5.1369e-06	9.88478e-06
1811	1.48373e-05	7.7054e-06	1.12713e-05
1812	1.49396e-05	7.7054e-06	1.13225e-05
1813	1.49396e-05	7.7054e-06	1.13225e-05
1814	1.49396e-05	7.7054e-06	1.13225e-05
1815	1.4735e-05	7.7054e-06	1.12202e-05
1816	1.45303e-05	8.9896e-06	1.176e-05
1817	1.34047e-05	8.9896e-06	1.11972e-05
1818	1.18698e-05	8.9896e-06	1.04297e-05
1819	2.04652e-05	1.6695e-05	1.85801e-05
1820	2.05675e-05	1.6695e-05	1.86313e-05
1821	2.07722e-05	1.6695e-05	1.87336e-05
1822	2.08745e-05	1.6695e-05	1.87848e-05
1823	2.08745e-05	1.6695e-05	1.87848e-05
1824	1.9442e-05	1.6695e-05	1.80685e-05
1825	3.7042e-05	3.8527e-05	3.77845e-05
1826	3.72467e-05	3.8527e-05	3.78869e-05
1827	3.72467e-05	3.9811e-05	3.8529e-05
1828	3.72467e-05	3.9811e-05	3.8529e-05
1829	3.71444e-05	3.9811e-05	3.84778e-05
1830	3.54048e-05	3.9811e-05	3.7608e-05
1831	3.50978e-05	3.9811e-05	3.74546e-05
1832	3.52002e-05	3.9811e-05	3.75057e-05
1833	3.52002e-05	3.9811e-05	3.75057e-05
1834	3.25397e-05	3.9811e-05	3.61755e-05
1835	3.48932e-05	4.8801e-05	4.18471e-05
1836	3.47909e-05	4.8801e-05	4.17959e-05
1837	3.48932e-05	4.8801e-05	4.18471e-05
1838	2.87536e-05	4.8801e-05	3.87773e-05
1839	3.08001e-05	5.0085e-05	4.04426e-05
1840	3.08001e-05	4.7517e-05	3.91584e-05
1841	3.08001e-05	4.6232e-05	3.85163e-05
1842	3.06978e-05	4.3664e-05	3.71809e-05
1843	3.04932e-05	4.3664e-05	3.70786e-05
1844	3.03908e-05	4.3664e-05	3.70274e-05
1845	2.40466e-05	3.9811e-05	3.19289e-05
1846	1.76001e-05	3.0822e-05	2.42109e-05
1847	1.78047e-05	2.9537e-05	2.36711e-05
1848	8.59539e-06	1.2842e-05	1.07189e-05
1849	1.14605e-05	1.5411e-05	1.34357e-05
1850	1.12559e-05	1.5411e-05	1.33333e-05
1851	1.11535e-05	1.5411e-05	1.32822e-05
1852	1.12559e-05	1.5411e-05	1.33333e-05
1853	1.13582e-05	1.5411e-05	1.33845e-05
1854	1.13582e-05	1.5411e-05	1.33845e-05
1855	9.8233e-06	1.4127e-05	1.19749e-05
1856	3.16188e-05	2.3116e-05	2.73675e-05
1857	3.20281e-05	2.3116e-05	2.75721e-05
1858	3.2949e-05	2.44e-05	2.86747e-05
1859	4.08281e-05	2.5685e-05	3.32564e-05
1860	4.22607e-05	2.5685e-05	3.39727e-05
1861	4.1749e-05	2.5685e-05	3.37169e-05
1862	4.21583e-05	2.5685e-05	3.39215e-05
1863	4.21583e-05	2.5685e-05	3.39215e-05
1864	4.15444e-05	2.5685e-05	3.36145e-05
1865	4.01118e-05	2.5685e-05	3.28983e-05
1866	4.68653e-05	2.8253e-05	3.75593e-05
1867	4.68653e-05	2.8253e-05	3.75593e-05
1868	4.69677e-05	2.8253e-05	3.76104e-05
1869	4.59444e-05	2.8253e-05	3.70988e-05
1870	4.52281e-05	2.6969e-05	3.60985e-05
1871	4.79909e-05	2.9537e-05	3.87642e-05
1872	4.82979e-05	2.8253e-05	3.82755e-05
1873	4.91165e-05	2.8253e-05	3.86848e-05
1874	5.01398e-05	2.8253e-05	3.91965e-05
1875	5.04468e-05	2.8253e-05	3.935e-05
1876	4.98328e-05	2.8253e-05	3.9043e-05
1877	4.96281e-05	2.8253e-05	3.89407e-05
1878	4.96281e-05	2.8253e-05	3.89407e-05
1879	4.95258e-05	2.6969e-05	3.82474e-05
1880	4.50235e-05	2.44e-05	3.4712e-05
1881	4.51258e-05	2.44e-05	3.47631e-05
1882	4.38979e-05	2.44e-05	3.41492e-05
1883	3.18234e-05	2.0548e-05	2.61856e-05
1884	3.15164e-05	2.0548e-05	2.60321e-05
1885	3.10048e-05	2.0548e-05	2.57763e-05
1886	1.81117e-05	1.7979e-05	1.80455e-05
1887	1.68838e-05	1.7979e-05	1.74315e-05
1888	1.57582e-05	1.7979e-05	1.68687e-05
1889	1.49396e-05	1.7979e-05	1.64594e-05
1890	1.26884e-05	1.2842e-05	1.27654e-05
1891	1.05396e-05	3.8527e-06	7.19614e-06
1892	1.01303e-05	3.8527e-06	6.99149e-06
1893	6.75352e-06	2.5685e-06	4.661e-06
1894	1.9442e-06	1.2842e-06	1.61421e-06
1895	1.9442e-06	0	9.72098e-07
1896	4.09304e-07	0	2.04652e-07
1897	8.18609e-07	1.2842e-06	1.05142e-06
1898	1.63722e-06	1.2842e-06	1.46073e-06
1899	1.63722e-06	1.2842e-06	1.46073e-06
1900	3.88839e-06	2.5685e-06	3.22843e-06
1901	4.19537e-06	3.8527e-06	4.02404e-06
1902	4.19537e-06	3.8527e-06	4.02404e-06
1903	4.19537e-06	3.8527e-06	4.02404e-06
1904	4.40002e-06	3.8527e-06	4.12636e-06
1905	4.60467e-06	3.8527e-06	4.22869e-06
1906	1.51443e-05	3.8527e-06	9.49848e-06
1907	1.53489e-05	3.8527e-06	9.60081e-06
1908	1.54512e-05	3.8527e-06	9.65197e-06
1909	1.56559e-05	3.8527e-06	9.7543e-06
1910	1.57582e-05	3.8527e-06	9.80546e-06
1911	1.57582e-05	3.8527e-06	9.80546e-06
1912	1.57582e-05	3.8527e-06	9.80546e-06
1913	1.55536e-05	3.8527e-06	9.70313e-06
1914	1.55536e-05	3.8527e-06	9.70313e-06
1915	1.55536e-05	3.8527e-06	9.70313e-06
1916	1.53489e-05	3.8527e-06	9.60081e-06
1917	1.48373e-05	2.5685e-06	8.70288e-06
1918	1.63722e-05	2.5685e-06	9.47032e-06
1919	1.63722e-05	2.5685e-06	9.47032e-06
1920	1.63722e-05	2.5685e-06	9.47032e-06
1921	1.63722e-05	2.5685e-06	9.47032e-06
1922	1.63722e-05	2.5685e-06	9.47032e-06
1923	1.61675e-05	2.5685e-06	9.36799e-06
1924	1.61675e-05	2.5685e-06	9.36799e-06
1925	1.57582e-05	2.5685e-06	9.16334e-06
1926	1.21768e-05	2.5685e-06	7.37264e-06
1927	9.8233e-06	2.5685e-06	6.19589e-06
1928	9.10702e-06	2.5685e-06	5.83774e-06
1929	3.37676e-06	1.2842e-06	2.3305e-06
1930	3.88839e-06	0	1.9442e-06
1931	3.88839e-06	0	1.9442e-06
1932	3.58141e-06	0	1.79071e-06
1933	4.40002e-06	0	2.20001e-06
1934	4.40002e-06	0	2.20001e-06
1935	4.2977e-06	0	2.14885e-06
1936	4.91165e-06	2.5685e-06	3.74006e-06
1937	4.91165e-06	2.5685e-06	3.74006e-06
1938	3.99072e-06	2.5685e-06	3.27959e-06
1939	6.85585e-06	5.1369e-06	5.99639e-06
1940	6.85585e-06	5.1369e-06	5.99639e-06
1941	6.75352e-06	5.1369e-06	5.94523e-06
1942	6.75352e-06	5.1369e-06	5.94523e-06
1943	6.75352e-06	5.1369e-06	5.94523e-06
1944	6.24189e-06	5.1369e-06	5.68941e-06
1945	6.95817e-06	1.2842e-05	9.90026e-06
1946	7.0605e-06	1.2842e-05	9.95142e-06
1947	7.16283e-06	1.2842e-05	1.00026e-05
1948	6.75352e-06	1.2842e-05	9.79793e-06
1949	6.85585e-06	1.2842e-05	9.8491e-06
1950	7.0605e-06	1.2842e-05	9.95142e-06
1951	6.95817e-06	1.2842e-05	9.90026e-06
1952	8.28841e-06	1.5411e-05	1.18496e-05
1953	7.87911e-06	1.5411e-05	1.1645e-05
1954	1.45303e-05	1.6695e-05	1.56127e-05
1955	1.54512e-05	1.6695e-05	1.60731e-05
1956	1.51443e-05	1.6695e-05	1.59197e-05
1957	3.09025e-05	2.8253e-05	2.95778e-05
1958	3.27443e-05	2.9537e-05	3.11409e-05
1959	3.3256e-05	2.9537e-05	3.13967e-05
1960	9.60842e-05	4.8801e-05	7.24425e-05
1961	9.72098e-05	4.8801e-05	7.30053e-05
1962	9.94609e-05	4.8801e-05	7.41309e-05
1963	9.97679e-05	4.8801e-05	7.42844e-05
1964	0.000100177	4.8801e-05	7.44891e-05
1965	0.000101098	5.0085e-05	7.55917e-05
1966	0.000101712	5.0085e-05	7.58986e-05
1967	0.000102121	5.0085e-05	7.61033e-05
1968	0.000100894	4.8801e-05	7.48472e-05
1969	0.00012801	5.5222e-05	9.1616e-05
1970	0.000140596	5.3938e-05	9.72669e-05
1971	0.00014254	5.3938e-05	9.8239e-05
1972	0.000143257	5.3938e-05	9.85972e-05
1973	0.000143973	5.3938e-05	9.89553e-05
1974	0.000143768	5.3938e-05	9.8853e-05
1975	0.000144484	5.3938e-05	9.92111e-05
1976	0.000142438	5.3938e-05	9.81879e-05
1977	0.000140801	5.3938e-05	9.73693e-05
1978	0.000147861	5.3938e-05	0.0001009
1979	0.000147964	5.3938e-05	0.000100951
1980	0.000147759	5.3938e-05	0.000100848
1981	0.000140494	4.7517e-05	9.40052e-05
1982	0.000140596	4.7517e-05	9.40564e-05
1983	0.000139368	4.7517e-05	9.34424e-05
1984	0.000139061	4.7517e-05	9.32889e-05
1985	0.000126782	4.4948e-05	8.58651e-05
1986	0.000127396	4.4948e-05	8.61721e-05
1987	0.000125145	4.3664e-05	8.44044e-05
1988	0.00012494	4.238e-05	8.36599e-05
1989	0.000121666	4.238e-05	8.20227e-05
1990	0.000117982	4.1096e-05	7.95387e-05
1991	6.33398e-05	3.339e-05	4.8365e-05
1992	2.56838e-05	1.5411e-05	2.05473e-05
1993	5.02421e-05	8.0907e-05	6.55744e-05
1994	5.1777e-05	8.3475e-05	6.76261e-05
1995	5.2084e-05	8.3475e-05	6.77796e-05
1996	5.24933e-05	8.2191e-05	6.73421e-05
1997	5.13677e-05	8.2191e-05	6.67793e-05
1998	4.33863e-05	8.0907e-05	6.21465e-05
1999	5.57677e-05	9.1181e-05	7.34742e-05
[truncated: 7,131 more rows]

## Sheet: CANC_dZF2
bp	CLIP28_density	CLIP51_density	average
1	3.07422e-05	0	1.53711e-05
2	5.89119e-05	0	2.94559e-05
3	6.31566e-05	0	3.15783e-05
4	0.000108948	0	5.44742e-05
5	0.000119367	0	5.96837e-05
6	0.000126185	0	6.30923e-05
7	0.000129658	0	6.48288e-05
8	0.00014072	7.5e-07	7.07348e-05
9	0.000155769	2.625e-06	7.91971e-05
10	0.000170561	2.625e-06	8.65932e-05
11	0.000173005	3e-06	8.80027e-05
12	0.000173906	3e-06	8.84529e-05
13	0.000174935	3e-06	8.89674e-05
14	0.000266776	1.3125e-05	0.00013995
15	0.000272049	1.3125e-05	0.000142587
16	0.000277066	1.3125e-05	0.000145095
17	0.000280024	1.3125e-05	0.000146575
18	0.000281439	1.35e-05	0.00014747
19	0.00031424	2.2875e-05	0.000168557
20	0.000315011	2.2875e-05	0.000168943
21	0.000318098	2.3625e-05	0.000170862
22	0.000312053	2.3625e-05	0.000167839
23	0.000641213	3.075e-05	0.000335982
24	0.00102388	3.975e-05	0.000531817
25	0.00107919	4.0875e-05	0.000560034
26	0.00109257	4.125e-05	0.00056691
27	0.00109592	4.125e-05	0.000568583
28	0.00109527	4.125e-05	0.000568261
29	0.00109669	4.125e-05	0.000568968
30	0.00103932	4.0875e-05	0.000540097
31	0.00128526	5.85e-05	0.000671878
32	0.00131909	5.8875e-05	0.00068898
33	0.00134263	6.1875e-05	0.00070225
34	0.00135742	6.1875e-05	0.000709646
35	0.00136192	6.1875e-05	0.000711897
36	0.00136218	6.15e-05	0.000711838
37	0.00142328	6.15e-05	0.000742387
38	0.00154547	6.3375e-05	0.000804423
39	0.0016076	6.5625e-05	0.000836612
40	0.00162201	6.525e-05	0.000843628
41	0.00162278	6.4875e-05	0.000843826
42	0.00162625	6.525e-05	0.00084575
43	0.00162458	6.45e-05	0.000844539
44	0.00159911	6.2625e-05	0.000830868
45	0.00148566	5.4e-05	0.00076983
46	0.00152271	6.825e-05	0.000795477
47	0.00153312	7.125e-05	0.000802187
48	0.00152245	6.825e-05	0.000795349
49	0.00150148	6.1875e-05	0.000781678
50	0.00152168	6.675e-05	0.000794213
51	0.00149685	6.5625e-05	0.000781238
52	0.00149646	6.5625e-05	0.000781045
53	0.00148798	6.5625e-05	0.0007768
54	0.0014791	6.5625e-05	0.000772362
55	0.00147396	6.5625e-05	0.00076979
56	0.00135562	5.925e-05	0.000707433
57	0.00122364	4.875e-05	0.000636197
58	0.000854222	3.675e-05	0.000445486
59	0.000833256	3.6375e-05	0.000434815
60	0.000549373	3.525e-05	0.000292311
61	0.000425117	3.375e-05	0.000229434
62	0.000400163	3.375e-05	0.000216957
63	0.000354114	3.3375e-05	0.000193745
64	0.000329932	3.3375e-05	0.000181654
65	0.000249925	2.9625e-05	0.000139775
66	0.000251083	2.9625e-05	0.000140354
67	0.000250568	2.9625e-05	0.000140097
68	0.000249411	2.9625e-05	0.000139518
69	0.000187412	2.5125e-05	0.000106268
70	0.000181495	2.475e-05	0.000103122
71	0.000167989	2.3625e-05	9.58069e-05
72	0.000126313	1.7625e-05	7.19691e-05
73	0.000128629	1.725e-05	7.29393e-05
74	0.000135832	1.6875e-05	7.63534e-05
75	6.00695e-05	2.625e-06	3.13473e-05
76	0.00020169	0.000111	0.000156345
77	0.000200532	0.00011287	0.000156703
78	0.000199632	0.00011287	0.000156253
79	0.00019976	0.00011287	0.000156317
80	0.000194358	0.00011287	0.000153616
81	0.000196287	0.0001185	0.000157393
82	0.000198217	0.00012075	0.000159483
83	0.00020349	0.0001275	0.000165495
84	0.000203233	0.00012825	0.000165741
85	0.000239506	0.00019687	0.00021819
86	0.000252241	0.00020887	0.000230557
87	0.000260087	0.0002145	0.000237293
88	0.000294559	0.000237	0.000265779
89	0.000296232	0.00023812	0.000267178
90	0.000296746	0.00023812	0.000267435
91	0.000293788	0.0002385	0.000266143
92	0.000300219	0.0002445	0.000272359
93	0.000297904	0.0002445	0.000271201
94	0.000290315	0.0002445	0.000267407
95	0.000229859	0.00024562	0.000237742
96	0.00027758	0.00033862	0.000308102
97	0.000301763	0.00035625	0.000329006
98	0.000303306	0.00035662	0.000329965
99	0.000302534	0.00035737	0.000329954
100	0.000283883	0.00035925	0.000321566
101	0.000617546	0.00071175	0.000664647
102	0.000629122	0.00072787	0.000678497
103	0.000656134	0.00076237	0.000709253
104	0.000859882	0.0009045	0.000882189
105	0.000875317	0.000915	0.000895157
106	0.00100227	0.00097275	0.00098751
107	0.0010069	0.00097575	0.000991325
108	0.00103739	0.00099637	0.00101688
109	0.00102954	0.0009975	0.00101352
110	0.00103906	0.00101287	0.00102597
111	0.00107289	0.00103462	0.00105376
112	0.00108434	0.00103987	0.00106211
113	0.00107109	0.00104025	0.00105567
114	0.00106787	0.001044	0.00105594
115	0.00105668	0.00104812	0.0010524
116	0.00106427	0.00105675	0.00106051
117	0.00104215	0.00105862	0.00105039
118	0.0010199	0.0010635	0.0010417
119	0.0010397	0.00106912	0.00105441
120	0.000972689	0.00106612	0.0010194
121	0.000993913	0.00106837	0.00103114
122	0.000951851	0.00106462	0.00100824
123	0.000967158	0.0010635	0.00101533
124	0.00096793	0.0010635	0.00101571
125	0.000906574	0.00106312	0.000984848
126	0.000821808	0.001059	0.000940402
127	0.000767913	0.00103875	0.000903329
128	0.000699868	0.000951	0.000825432
129	0.000700383	0.00094612	0.000823252
130	0.000685462	0.00092587	0.000805667
131	0.000368392	0.00029287	0.000330633
132	0.000396047	0.00029437	0.000345211
133	0.000401578	0.00029287	0.000347226
134	0.000360031	0.00021487	0.000287453
135	0.000307937	9.975e-05	0.000203843
136	0.00032453	0.00010087	0.000212702
137	0.000302663	8.775e-05	0.000195206
138	0.000303049	8.7375e-05	0.000195212
139	0.000303306	8.6625e-05	0.000194965
140	0.00030292	8.6625e-05	0.000194772
141	0.000295331	7.8375e-05	0.000186853
142	0.00028607	7.4625e-05	0.000180347
143	0.000274107	6.5625e-05	0.000169866
144	0.000267033	6.4125e-05	0.000165579
145	0.000249411	5.55e-05	0.000152455
146	0.000188827	3.9e-05	0.000113913
147	0.00019603	4.3125e-05	0.000119577
148	0.00019513	4.275e-05	0.00011894
149	0.0001932	4.2375e-05	0.000117787
150	0.000165416	3.825e-05	0.000101833
151	0.000107791	2.9625e-05	6.87078e-05
152	7.66626e-05	2.625e-05	5.14563e-05
153	7.19034e-05	2.8125e-05	5.00141e-05
154	7.49905e-05	3.1125e-05	5.30577e-05
155	7.16461e-05	3.4875e-05	5.32605e-05
156	5.98123e-05	2.475e-05	4.22811e-05
157	0.000112679	0.0001245	0.000118589
158	0.000113965	0.00012937	0.00012167
159	0.000112035	0.0001305	0.000121268
160	0.000111907	0.00013687	0.000124391
161	0.000134674	0.00022875	0.000181712
162	0.000136604	0.00023325	0.000184926
163	0.000139562	0.00023512	0.000187343
164	0.000147666	0.00024525	0.000196457
165	0.000150495	0.000246	0.000198247
166	0.000158856	0.00024825	0.000203553
167	0.000160657	0.00024862	0.000204641
168	0.000160914	0.00024825	0.000204582
169	0.000161043	0.00024787	0.000204459
170	0.000160657	0.00024787	0.000204266
171	0.000160528	0.00024787	0.000204201
172	0.000157055	0.0002475	0.000202277
173	0.000157827	0.00024787	0.000202851
174	0.000157313	0.0002475	0.000202406
175	0.000156026	0.00024675	0.000201388
176	0.000145222	0.00023625	0.000190735
177	0.000150238	0.00024112	0.000195681
178	0.000148695	0.00024037	0.000194534
179	0.000107662	0.0002205	0.000164081
180	0.000124641	0.00022912	0.000176883
181	0.000131073	0.00022912	0.000180098
182	0.0001285	0.0002265	0.0001775
183	0.000132359	0.000225	0.000178679
184	0.000128886	0.00021562	0.000172255
185	0.00012477	0.00020925	0.000167009
186	0.000124384	0.00020925	0.000166817
187	0.000117309	0.00019875	0.000158029
188	0.000106504	0.00018412	0.000145314
189	9.08118e-05	0.00016462	0.000127718
190	9.41561e-05	0.00016762	0.00013089
191	9.28698e-05	0.0001665	0.000129685
192	9.01686e-05	0.00015975	0.000124959
193	5.59534e-05	8.325e-05	6.96016e-05
194	0.000201304	0.00030525	0.000253276
195	0.000202719	0.000303	0.000252859
196	0.000203748	0.00030412	0.000253936
197	0.000204262	0.000303	0.000253631
198	0.000204905	0.00030337	0.00025414
199	0.000202719	0.00029775	0.000250234
200	0.000201432	0.00029325	0.000247341
201	0.000202333	0.000285	0.000243666
202	0.000270377	0.000342	0.000306188
203	0.000277323	0.00035362	0.000315473
204	0.000276037	0.000348	0.000312018
205	0.000276037	0.000348	0.000312018
206	0.000275522	0.00034687	0.000311198
207	0.000261373	0.00032925	0.000295311
208	0.0003864	0.0003885	0.000387449
209	0.000403251	0.00039262	0.000397937
210	0.000404923	0.00038962	0.000397273
211	0.000412769	0.00039262	0.000402696
212	0.000450843	0.00040612	0.000428483
213	0.000407367	0.00035437	0.00038087
214	0.000612015	0.0005265	0.000569256
215	0.000614973	0.00053175	0.000573361
216	0.000616388	0.0005325	0.000574443
217	0.000616131	0.000531	0.000573564
218	0.00059748	0.00051375	0.000555614
219	0.000587318	0.00050325	0.000545283
220	0.000682117	0.00068587	0.000683995
221	0.000684304	0.00069375	0.000689026
222	0.000687391	0.00070162	0.000694507
223	0.000688163	0.0007035	0.00069583
224	0.000670026	0.00068887	0.000679449
225	0.000670541	0.00069	0.000680269
226	0.000669254	0.00068962	0.000679439
227	0.000668611	0.00069225	0.000680429
228	0.000630409	0.00068437	0.000657391
229	0.000640956	0.00072525	0.000683102
230	0.000646873	0.00074775	0.00069731
231	0.000677615	0.00079162	0.000734619
232	0.00067247	0.00080175	0.000737109
233	0.000639798	0.00081712	0.00072846
234	0.000671055	0.00082725	0.000749151
235	0.000662437	0.00082575	0.000744092
236	0.000562621	0.00079725	0.000679934
237	0.00056841	0.00080625	0.000687328
238	0.000504224	0.00074287	0.000623548
239	0.000623977	0.00079762	0.0007108
240	0.000625263	0.00079875	0.000712005
241	0.000625135	0.00079687	0.000711004
242	0.000626292	0.00079837	0.000712332
243	0.000606226	0.00078937	0.000697799
244	0.000589376	0.00075937	0.000674374
245	0.000588218	0.00073575	0.000661983
246	0.000598251	0.00073912	0.000668687
247	0.000598895	0.00073875	0.000668821
248	0.000590405	0.00072562	0.000658014
249	0.000586418	0.00071175	0.000649083
250	0.000573812	0.00069712	0.000635467
251	0.000573555	0.0006945	0.000634026
252	0.000544356	0.0006645	0.000604427
253	0.000514128	0.00063675	0.000575438
254	0.000515157	0.00062925	0.000572203
255	0.000483643	0.00057712	0.000530383
256	0.000483129	0.00057675	0.000529938
257	0.00046332	0.0005595	0.000511409
258	0.000277066	0.00031425	0.000295657
259	0.000277966	0.00031425	0.000296108
260	0.000220855	0.00023212	0.00022649
261	0.000234104	0.0002535	0.000243802
262	0.000193972	0.00018937	0.000191673
263	0.000244008	0.0002985	0.000271254
264	0.000230631	0.00028275	0.00025669
265	0.000249154	0.00031275	0.000280951
266	0.000248639	0.00031162	0.000280131
267	0.0002251	0.00027525	0.000250175
268	0.000391803	0.0004815	0.00043665
269	0.000397848	0.00048825	0.000443048
270	0.000387686	0.00048412	0.000435905
271	0.000391545	0.00048525	0.000438397
272	0.000390902	0.0004845	0.0004377
273	0.000391674	0.00048562	0.000438649
274	0.00038357	0.000477	0.000430284
275	0.000419715	0.000486	0.000452857
276	0.000423702	0.000486	0.00045485
277	0.000422802	0.000486	0.0004544
278	0.000422288	0.00048525	0.000453768
279	0.000421644	0.00048525	0.000453446
280	0.000420487	0.00048487	0.00045268
281	0.000413798	0.00048487	0.000449336
282	0.000413798	0.00048487	0.000449336
283	0.000410454	0.00048412	0.000447289
284	0.00039669	0.00048	0.000438344
285	0.000403894	0.0004815	0.000442696
286	0.000402736	0.00048037	0.000441555
287	0.000379197	0.00046612	0.00042266
288	0.000353986	0.00045037	0.00040218
289	0.000369035	0.00044625	0.000407642
290	0.000356044	0.00043837	0.000397209
291	0.000301248	0.000384	0.000342623
292	0.000381255	0.00044175	0.000411502
293	0.000378811	0.00044137	0.000410092
294	0.000373409	0.00043312	0.000403266
295	0.000273722	0.00030825	0.000290985
296	0.000460748	0.000474	0.000467373
297	0.000453673	0.00046687	0.000460273
298	0.000480685	0.00048787	0.000484279
299	0.000472967	0.00047475	0.000473858
300	0.000470909	0.00047325	0.000472079
301	0.00107752	0.00111	0.00109376
302	0.00129786	0.00130725	0.00130255
303	0.0013798	0.00133725	0.00135852
304	0.00141543	0.00134175	0.00137859
305	0.00144553	0.00134362	0.00139457
306	0.00145466	0.00132412	0.00138939
307	0.00159088	0.00144224	0.00151656
308	0.00171333	0.00153299	0.00162316
309	0.00180041	0.00158999	0.0016952
310	0.00208803	0.00188324	0.00198563
311	0.00212443	0.00190049	0.00201246
312	0.00212867	0.00189599	0.00201233
313	0.00213575	0.00188849	0.00201212
314	0.00232149	0.00200887	0.00216518
315	0.00232432	0.00201337	0.00216884
316	0.00232342	0.00201449	0.00216896
317	0.0024024	0.00204937	0.00222588
318	0.00240741	0.00205049	0.00222895
319	0.00241294	0.00205874	0.00223584
320	0.00241384	0.00205799	0.00223592
321	0.00241487	0.00205912	0.00223699
322	0.0024105	0.00205762	0.00223406
323	0.00233847	0.00199574	0.0021671
324	0.00248819	0.00207449	0.00228134
325	0.00249398	0.00207637	0.00228517
326	0.00250093	0.00207524	0.00228808
327	0.0025026	0.00207149	0.00228705
328	0.00250581	0.00207262	0.00228921
329	0.002499	0.00206962	0.00228431
330	0.00250839	0.00207074	0.00228956
331	0.00243905	0.00201824	0.00222865
332	0.00244304	0.00201824	0.00223064
333	0.00226939	0.00195487	0.00211213
334	0.0022712	0.00195562	0.00211341
335	0.00226489	0.00195449	0.00210969
336	0.00224946	0.00195224	0.00210085
337	0.00206951	0.00193724	0.00200337
338	0.0020578	0.00193762	0.00199771
339	0.00205458	0.00193762	0.0019961
340	0.00202796	0.00193012	0.00197904
341	0.0019612	0.00190574	0.00193347
342	0.0019284	0.00188887	0.00190863
343	0.0017006	0.00180487	0.00175273
344	0.00161982	0.00177299	0.00169641
345	0.00161763	0.00177112	0.00169438
346	0.00148605	0.00161512	0.00155058
347	0.00148399	0.00161474	0.00154937
348	0.00142353	0.00158812	0.00150583
349	0.000993398	0.00136462	0.00117901
350	0.000981436	0.00135712	0.00116928
351	0.000815891	0.00112537	0.000970631
352	0.000605712	0.00099187	0.000798792
353	0.000598637	0.00098062	0.000789629
354	0.000573298	0.000957	0.000765147
355	9.004e-05	0.00013162	0.000110832
356	9.47993e-05	0.00013162	0.000113212
357	8.95255e-05	0.000126	0.000107763
358	5.17087e-05	5.7e-05	5.43542e-05
359	6.95881e-05	5.5875e-05	6.27314e-05
360	7.01026e-05	5.5875e-05	6.29887e-05
361	7.01026e-05	5.5875e-05	6.29887e-05
362	6.80445e-05	5.2125e-05	6.00847e-05
363	7.25465e-05	5.25e-05	6.25232e-05
364	7.25465e-05	5.25e-05	6.25232e-05
365	7.24179e-05	5.175e-05	6.20839e-05
366	7.25465e-05	5.175e-05	6.21482e-05
367	6.94594e-05	4.95e-05	5.94796e-05
368	6.94594e-05	4.95e-05	5.94796e-05
369	6.89449e-05	4.95e-05	5.92224e-05
370	6.86877e-05	4.95e-05	5.90937e-05
371	6.86877e-05	4.95e-05	5.90937e-05
372	6.54719e-05	4.8375e-05	5.69234e-05
373	4.36051e-05	3e-05	3.68025e-05
374	5.94264e-05	3.0375e-05	4.49006e-05
375	5.96837e-05	3.0375e-05	4.50293e-05
376	6.14845e-05	3.0375e-05	4.59297e-05
377	5.87833e-05	1.6125e-05	3.74541e-05
378	0.000127728	2.4375e-05	7.60515e-05
379	0.000139562	2.625e-05	8.29059e-05
380	0.000144321	2.625e-05	8.52856e-05
381	0.000144836	2.4375e-05	8.46053e-05
382	0.00018008	2.4375e-05	0.000102227
383	0.000187798	2.4375e-05	0.000106086
384	0.000189599	2.4375e-05	0.000106987
385	0.000190628	2.4375e-05	0.000107501
386	0.000190885	2.4375e-05	0.00010763
387	0.000190242	2.4375e-05	0.000107308
388	0.000190242	2.4375e-05	0.000107308
389	0.000190113	2.2875e-05	0.000106494
390	0.000191142	2.2875e-05	0.000107008
391	0.000190628	2.2875e-05	0.000106751
392	0.000188312	2.025e-05	0.000104281
393	0.000194872	1.9125e-05	0.000106999
394	0.000220212	1.9125e-05	0.000119669
395	0.000233847	1.95e-05	0.000126673
396	0.000238349	1.9125e-05	0.000128737
397	0.000220598	1.6125e-05	0.000118361
398	0.000227029	1.65e-05	0.000121765
399	0.000226901	1.6125e-05	0.000121513
400	0.000226644	1.6125e-05	0.000121384
401	0.000226258	1.6125e-05	0.000121191
402	0.000219183	1.575e-05	0.000117467
403	0.000205677	1.35e-05	0.000109589
404	0.000205934	1.35e-05	0.000109717
405	0.000205934	1.35e-05	0.000109717
406	0.000205934	1.35e-05	0.000109717
407	0.000204777	1.35e-05	0.000109138
408	0.000204777	1.35e-05	0.000109138
409	0.000204519	1.35e-05	0.00010901
410	0.000204519	1.35e-05	0.00010901
411	0.00019976	1.275e-05	0.000106255
412	0.00019976	1.275e-05	0.000106255
413	0.000193843	1.275e-05	0.000103297
414	0.000192686	1.275e-05	0.000102718
415	0.000182009	1.125e-05	9.66297e-05
416	0.000171591	1.0125e-05	9.08577e-05
417	7.2032e-06	4.125e-06	5.66409e-06
418	7.33183e-06	7.125e-06	7.2284e-06
419	7.07457e-06	7.125e-06	7.09977e-06
420	4.24474e-06	5.625e-06	4.93486e-06
421	4.37337e-06	7.5e-06	5.93667e-06
422	3.6016e-06	7.5e-06	5.55079e-06
423	3.98749e-06	7.875e-06	5.93123e-06
424	3.98749e-06	8.25e-06	6.11873e-06
425	3.47297e-06	7.125e-06	5.29897e-06
426	2.95846e-06	7.125e-06	5.04172e-06
427	2.57257e-06	6.75e-06	4.66127e-06
428	3.6016e-06	1.05e-05	7.05078e-06
429	3.85886e-06	1.05e-05	7.17941e-06
430	4.24474e-06	1.125e-05	7.74735e-06
431	4.24474e-06	1.125e-05	7.74735e-06
432	3.21571e-06	1.125e-05	7.23284e-06
433	5.27377e-06	1.4625e-05	9.94936e-06
434	5.27377e-06	1.4625e-05	9.94936e-06
435	9.64714e-06	1.95e-05	1.45735e-05
436	1.01617e-05	1.9125e-05	1.46433e-05
437	2.58543e-05	3.825e-05	3.20521e-05
438	2.66261e-05	3.8625e-05	3.26255e-05
439	2.68834e-05	3.8625e-05	3.27541e-05
440	5.04224e-05	0.00012487	8.76485e-05
441	5.18373e-05	0.00013012	9.09809e-05
442	6.13558e-05	0.00013837	9.98652e-05
443	6.22562e-05	0.00013837	0.000100315
444	6.23849e-05	0.00013837	0.00010038
445	6.22562e-05	0.00013837	0.000100315
446	6.79159e-05	0.0001515	0.000109708
447	6.80445e-05	0.0001515	0.000109772
448	6.79159e-05	0.0001515	0.000109708
449	6.77873e-05	0.00015187	0.000109831
450	8.28368e-05	0.00018037	0.000131606
451	8.29654e-05	0.00018037	0.00013167
452	8.33513e-05	0.00018037	0.000131863
453	8.36086e-05	0.00018037	0.000131991
454	8.36086e-05	0.00018037	0.000131991
455	8.36086e-05	0.00018037	0.000131991
456	7.78203e-05	0.00018037	0.000129097
457	6.86877e-05	0.00017887	0.000123781
458	7.67913e-05	0.00018525	0.00013102
459	7.66626e-05	0.000186	0.000131331
460	7.67913e-05	0.000186	0.000131395
461	7.52477e-05	0.00018562	0.000130436
462	5.01651e-05	0.00017925	0.000114707
463	5.53103e-05	0.00018375	0.00011953
464	5.54389e-05	0.000183	0.000119219
465	5.46671e-05	0.00018075	0.000117708
466	5.22232e-05	0.000174	0.000113111
467	5.0551e-05	0.00016575	0.00010815
468	5.11942e-05	0.00016575	0.000108472
469	3.71737e-05	0.0001095	7.33366e-05
470	4.23188e-05	0.00011212	7.72217e-05
471	4.23188e-05	0.00011212	7.72217e-05
472	4.07753e-05	0.00010425	7.25124e-05
473	3.09995e-05	3.3375e-05	3.21872e-05
474	4.56631e-05	4.35e-05	4.45815e-05
475	4.57918e-05	4.425e-05	4.50208e-05
476	4.54059e-05	3.975e-05	4.25779e-05
477	4.48914e-05	3.5625e-05	4.02581e-05
478	4.55345e-05	3.7125e-05	4.13297e-05
479	4.55345e-05	3.675e-05	4.11422e-05
480	4.55345e-05	3.675e-05	4.11422e-05
481	4.55345e-05	3.675e-05	4.11422e-05
482	4.32192e-05	3.5625e-05	3.9422e-05
483	4.19329e-05	3.45e-05	3.82164e-05
484	4.12898e-05	3.4125e-05	3.77073e-05
485	3.91031e-05	3.3375e-05	3.6239e-05
486	3.75595e-05	3.3375e-05	3.54672e-05
487	3.08709e-05	3.225e-05	3.15604e-05
488	3.43438e-05	4.5375e-05	3.98593e-05
489	3.42152e-05	4.5375e-05	3.9795e-05
490	3.51156e-05	4.65e-05	4.08077e-05
491	3.4987e-05	4.65e-05	4.07434e-05
492	3.43438e-05	4.5e-05	3.96718e-05
493	1.36346e-05	3.975e-05	2.66922e-05
494	1.40205e-05	4.2375e-05	2.81977e-05
495	1.37633e-05	4.2375e-05	2.80691e-05
496	1.29915e-05	4.35e-05	2.82457e-05
497	1.67217e-05	6.8625e-05	4.26732e-05
498	1.67217e-05	6.9e-05	4.28607e-05
499	1.65931e-05	6.9375e-05	4.29839e-05
500	1.64645e-05	6.9375e-05	4.29196e-05
501	1.64645e-05	6.9375e-05	4.29196e-05
502	1.64645e-05	6.9375e-05	4.29196e-05
503	1.64645e-05	6.9375e-05	4.29196e-05
504	1.55641e-05	6.75e-05	4.15319e-05
505	1.53068e-05	6.7125e-05	4.12158e-05
506	1.17052e-05	6.6e-05	3.88525e-05
507	1.17052e-05	6.6e-05	3.88525e-05
508	1.17052e-05	6.5625e-05	3.8665e-05
509	1.17052e-05	6.15e-05	3.66025e-05
510	7.07457e-06	4.9125e-05	2.80997e-05
511	7.71771e-06	4.95e-05	2.86088e-05
512	7.71771e-06	4.95e-05	2.86088e-05
513	7.84634e-06	4.9125e-05	2.84856e-05
514	7.07457e-06	4.6875e-05	2.69747e-05
515	8.74674e-06	5.5875e-05	3.23108e-05
516	8.23223e-06	5.55e-05	3.1866e-05
517	7.97497e-06	5.5125e-05	3.15499e-05
518	8.23223e-06	5.55e-05	3.1866e-05
519	8.23223e-06	5.5125e-05	3.16785e-05
520	8.23223e-06	5.5125e-05	3.16785e-05
521	8.23223e-06	5.4375e-05	3.13035e-05
522	6.17417e-06	4.125e-05	2.3712e-05
523	6.43143e-06	4.275e-05	2.45906e-05
524	6.43143e-06	4.3125e-05	2.47781e-05
525	6.04554e-06	4.125e-05	2.36477e-05
526	5.53103e-06	2.85e-05	1.70155e-05
527	5.53103e-06	3.0375e-05	1.7953e-05
528	4.37337e-06	2.5125e-05	1.47491e-05
529	4.88789e-06	3.1875e-05	1.83814e-05
530	4.88789e-06	3.1875e-05	1.83814e-05
531	4.502e-06	3e-05	1.72509e-05
532	4.24474e-06	2.8875e-05	1.65598e-05
533	5.27377e-06	3.3e-05	1.91368e-05
534	5.27377e-06	3.3375e-05	1.93243e-05
535	5.27377e-06	3.3375e-05	1.93243e-05
536	5.53103e-06	3.15e-05	1.85155e-05
537	5.65966e-06	3.1875e-05	1.87673e-05
538	5.78829e-06	3.1875e-05	1.88316e-05
539	5.65966e-06	3.15e-05	1.85798e-05
540	4.88789e-06	3.1875e-05	1.83814e-05
541	7.97497e-06	4.2375e-05	2.51749e-05
542	7.97497e-06	4.125e-05	2.46124e-05
543	7.97497e-06	4.125e-05	2.46124e-05
544	7.84634e-06	4.0125e-05	2.39856e-05
545	1.64645e-05	5.5875e-05	3.61696e-05
546	1.64645e-05	5.5875e-05	3.61696e-05
547	1.63358e-05	5.5875e-05	3.61053e-05
548	1.63358e-05	5.5875e-05	3.61053e-05
549	1.62072e-05	5.5875e-05	3.6041e-05
550	1.54354e-05	5.475e-05	3.50926e-05
551	1.55641e-05	5.625e-05	3.59069e-05
552	1.55641e-05	5.5125e-05	3.53444e-05
553	1.55641e-05	5.475e-05	3.51569e-05
554	1.55641e-05	5.475e-05	3.51569e-05
555	1.53068e-05	5.475e-05	3.50283e-05
556	1.51782e-05	5.4375e-05	3.47765e-05
557	1.51782e-05	5.4375e-05	3.47765e-05
558	1.49209e-05	5.3625e-05	3.42729e-05
559	1.47923e-05	5.3625e-05	3.42085e-05
560	1.23483e-05	4.575e-05	2.90491e-05
561	1.23483e-05	4.575e-05	2.90491e-05
562	1.23483e-05	4.575e-05	2.90491e-05
563	1.23483e-05	4.5375e-05	2.88616e-05
564	1.14479e-05	4.0125e-05	2.57864e-05
565	4.24474e-06	2.025e-05	1.22473e-05
566	4.24474e-06	2.025e-05	1.22473e-05
567	3.47297e-06	1.875e-05	1.11115e-05
568	7.71771e-07	1.0125e-05	5.44837e-06
569	1.02903e-06	9.75e-06	5.3895e-06
570	5.14514e-07	4.125e-06	2.31975e-06
571	5.14514e-07	4.125e-06	2.31975e-06
572	5.14514e-07	3.375e-06	1.94475e-06
573	1.02903e-06	3.375e-06	2.20201e-06
574	1.15766e-06	3.375e-06	2.26632e-06
575	1.15766e-06	3.375e-06	2.26632e-06
576	1.41491e-06	3.375e-06	2.39495e-06
577	1.54354e-06	1.5e-06	1.52177e-06
578	2.57257e-06	1.125e-06	1.84878e-06
579	2.82983e-06	1.125e-06	1.97741e-06
580	2.82983e-06	7.5e-07	1.78991e-06
581	5.91691e-06	3e-06	4.45845e-06
582	5.91691e-06	3e-06	4.45845e-06
583	5.91691e-06	3e-06	4.45845e-06
584	9.004e-06	3.75e-06	6.37699e-06
585	9.004e-06	3.75e-06	6.37699e-06
586	9.004e-06	3.75e-06	6.37699e-06
587	9.13263e-06	3.75e-06	6.44131e-06
588	9.26126e-06	3.75e-06	6.50562e-06
589	9.26126e-06	3.75e-06	6.50562e-06
590	9.26126e-06	3.75e-06	6.50562e-06
591	9.13263e-06	3.75e-06	6.44131e-06
592	1.49209e-05	6.75e-06	1.08354e-05
593	1.58213e-05	6.75e-06	1.12856e-05
594	1.78794e-05	6.75e-06	1.23147e-05
595	2.58543e-05	9.75e-06	1.78022e-05
596	2.66261e-05	9.75e-06	1.8188e-05
597	3.6016e-05	1.05e-05	2.3258e-05
598	3.6016e-05	9.75e-06	2.2883e-05
599	3.66591e-05	9.75e-06	2.32046e-05
600	3.47297e-05	9e-06	2.18648e-05
601	3.4987e-05	9e-06	2.19935e-05
602	3.47297e-05	9e-06	2.18648e-05
603	3.43438e-05	9e-06	2.16719e-05
604	3.84599e-05	1.1625e-05	2.50424e-05
605	3.85886e-05	1.1625e-05	2.51068e-05
606	3.84599e-05	1.2375e-05	2.54174e-05
607	3.84599e-05	1.2375e-05	2.54174e-05
608	3.85886e-05	1.275e-05	2.56693e-05
609	3.85886e-05	1.275e-05	2.56693e-05
610	3.7045e-05	1.275e-05	2.48975e-05
611	4.09039e-05	1.3875e-05	2.73894e-05
612	4.07753e-05	1.3875e-05	2.73251e-05
613	4.11611e-05	1.3875e-05	2.7518e-05
614	4.12898e-05	1.3875e-05	2.75824e-05
615	4.32192e-05	1.425e-05	2.87346e-05
616	3.28003e-05	1.1625e-05	2.22126e-05
617	3.9489e-05	2.2875e-05	3.11819e-05
618	3.9489e-05	2.475e-05	3.21194e-05
619	3.82027e-05	2.475e-05	3.14763e-05
620	3.82027e-05	2.55e-05	3.18513e-05
621	3.74309e-05	2.55e-05	3.14654e-05
622	3.71737e-05	2.5125e-05	3.11493e-05
623	2.44394e-05	2.2875e-05	2.36572e-05
624	2.49539e-05	2.2875e-05	2.39144e-05
625	2.45681e-05	2.2125e-05	2.33465e-05
626	2.3539e-05	2.1e-05	2.22695e-05
627	3.26717e-05	2.1e-05	2.68358e-05
628	3.28003e-05	2.1e-05	2.69001e-05
629	3.28003e-05	2.1e-05	2.69001e-05
630	3.28003e-05	2.1e-05	2.69001e-05
631	3.18999e-05	2.025e-05	2.60749e-05
632	3.18999e-05	2.025e-05	2.60749e-05
633	3.18999e-05	2.025e-05	2.60749e-05
634	2.85555e-05	2.025e-05	2.44027e-05
635	2.82983e-05	2.025e-05	2.42741e-05
636	2.5983e-05	2.0625e-05	2.33039e-05
637	1.99374e-05	2.0625e-05	2.02812e-05
638	3.21571e-05	2.925e-05	3.07035e-05
639	3.18999e-05	2.925e-05	3.05749e-05
640	3.31862e-05	3.0375e-05	3.17805e-05
641	3.09995e-05	3.1125e-05	3.10622e-05
642	4.03894e-05	4.05e-05	4.04446e-05
643	4.19329e-05	4.05e-05	4.12164e-05
644	4.20615e-05	4.05e-05	4.12807e-05
645	4.21902e-05	4.05e-05	4.1345e-05
646	3.66591e-05	3.9e-05	3.78295e-05
647	3.76882e-05	3.975e-05	3.8719e-05
648	3.76882e-05	3.975e-05	3.8719e-05
649	3.76882e-05	3.975e-05	3.8719e-05
650	3.76882e-05	3.975e-05	3.8719e-05
651	3.76882e-05	3.975e-05	3.8719e-05
652	3.75595e-05	3.9375e-05	3.84672e-05
653	3.75595e-05	3.9375e-05	3.84672e-05
654	3.71737e-05	3.9375e-05	3.82743e-05
655	3.71737e-05	3.9375e-05	3.82743e-05
656	3.7045e-05	3.9375e-05	3.82099e-05
657	2.37963e-05	3.675e-05	3.02731e-05
658	2.45681e-05	3.6375e-05	3.04715e-05
659	2.46967e-05	3.6375e-05	3.05358e-05
660	2.37963e-05	3.525e-05	2.95231e-05
661	2.26386e-05	3.375e-05	2.81943e-05
662	4.24474e-06	7.125e-06	5.68486e-06
663	8.87537e-06	8.625e-06	8.75017e-06
664	1.0033e-05	8.625e-06	9.329e-06
665	1.08048e-05	8.625e-06	9.71488e-06
666	1.09334e-05	8.625e-06	9.7792e-06
667	1.09334e-05	8.625e-06	9.7792e-06
668	9.9044e-06	7.125e-06	8.51469e-06
669	1.11907e-05	7.125e-06	9.15783e-06
670	1.11907e-05	7.125e-06	9.15783e-06
671	1.11907e-05	7.125e-06	9.15783e-06
672	1.11907e-05	7.125e-06	9.15783e-06
673	1.11907e-05	7.125e-06	9.15783e-06
674	1.11907e-05	7.125e-06	9.15783e-06
675	1.11907e-05	6.75e-06	8.97033e-06
676	1.11907e-05	6.75e-06	8.97033e-06
677	1.11907e-05	6.375e-06	8.78283e-06
678	1.10621e-05	6.375e-06	8.71852e-06
679	1.0033e-05	3.375e-06	6.70401e-06
680	1.0033e-05	3.375e-06	6.70401e-06
681	9.77577e-06	2.625e-06	6.20038e-06
682	9.77577e-06	2.625e-06	6.20038e-06
683	9.64714e-06	2.25e-06	5.94857e-06
684	7.71771e-06	1.125e-06	4.42135e-06
685	7.71771e-06	1.125e-06	4.42135e-06
686	7.71771e-06	1.125e-06	4.42135e-06
687	7.58909e-06	1.125e-06	4.35704e-06
688	4.88789e-06	3.75e-07	2.63144e-06
689	4.88789e-06	0	2.44394e-06
690	4.88789e-06	0	2.44394e-06
691	3.34434e-06	0	1.67217e-06
692	4.11611e-06	0	2.05806e-06
693	4.11611e-06	0	2.05806e-06
694	3.6016e-06	0	1.8008e-06
695	3.6016e-06	0	1.8008e-06
696	3.6016e-06	0	1.8008e-06
697	3.6016e-06	0	1.8008e-06
698	1.92943e-06	0	9.64714e-07
699	2.18669e-06	1.5e-06	1.84334e-06
700	1.92943e-06	1.5e-06	1.71471e-06
701	3.47297e-06	1.875e-06	2.67398e-06
702	3.47297e-06	1.875e-06	2.67398e-06
703	3.47297e-06	1.875e-06	2.67398e-06
704	3.47297e-06	1.875e-06	2.67398e-06
705	3.47297e-06	1.875e-06	2.67398e-06
706	3.47297e-06	1.875e-06	2.67398e-06
707	3.08709e-06	1.875e-06	2.48104e-06
708	3.85886e-06	1.875e-06	2.86693e-06
709	3.85886e-06	1.875e-06	2.86693e-06
710	3.6016e-06	1.875e-06	2.7383e-06
711	4.88789e-06	4.5e-06	4.69393e-06
712	4.88789e-06	4.5e-06	4.69393e-06
713	4.75926e-06	4.5e-06	4.62962e-06
714	4.75926e-06	4.5e-06	4.62962e-06
715	5.4024e-06	5.25e-06	5.32619e-06
716	5.4024e-06	5.25e-06	5.32619e-06
717	5.4024e-06	5.25e-06	5.32619e-06
718	5.4024e-06	5.625e-06	5.51369e-06
719	5.14514e-06	5.625e-06	5.38506e-06
720	6.04554e-06	8.25e-06	7.14776e-06
721	6.04554e-06	8.25e-06	7.14776e-06
722	6.04554e-06	8.25e-06	7.14776e-06
723	6.04554e-06	8.25e-06	7.14776e-06
724	5.53103e-06	8.25e-06	6.8905e-06
725	5.53103e-06	8.25e-06	6.8905e-06
726	5.14514e-06	8.25e-06	6.69756e-06
727	5.14514e-06	8.25e-06	6.69756e-06
728	5.01651e-06	8.25e-06	6.63324e-06
729	4.63063e-06	8.25e-06	6.4403e-06
730	3.47297e-06	7.875e-06	5.67397e-06
731	3.47297e-06	7.875e-06	5.67397e-06
732	3.34434e-06	7.875e-06	5.60966e-06
733	3.34434e-06	7.875e-06	5.60966e-06
734	3.21571e-06	7.875e-06	5.54534e-06
735	3.21571e-06	7.875e-06	5.54534e-06
736	3.21571e-06	7.875e-06	5.54534e-06
737	3.21571e-06	7.5e-06	5.35784e-06
738	3.21571e-06	7.5e-06	5.35784e-06
739	3.08709e-06	7.5e-06	5.29353e-06
740	2.95846e-06	7.5e-06	5.22922e-06
741	2.57257e-06	7.5e-06	5.03627e-06
742	2.82983e-06	6e-06	4.4149e-06
743	2.57257e-06	6e-06	4.28628e-06
744	2.57257e-06	5.625e-06	4.09878e-06
745	2.57257e-06	5.625e-06	4.09878e-06
746	1.92943e-06	3e-06	2.46471e-06
747	9.004e-07	2.25e-06	1.5752e-06
748	1.15766e-06	2.25e-06	1.70382e-06
749	1.15766e-06	2.25e-06	1.70382e-06
750	1.15766e-06	2.25e-06	1.70382e-06
751	1.15766e-06	2.25e-06	1.70382e-06
752	1.41491e-06	2.25e-06	1.83245e-06
753	1.41491e-06	2.25e-06	1.83245e-06
754	1.41491e-06	2.25e-06	1.83245e-06
755	1.15766e-06	2.25e-06	1.70382e-06
756	1.15766e-06	2.25e-06	1.70382e-06
757	1.15766e-06	1.875e-06	1.51633e-06
758	1.15766e-06	1.875e-06	1.51633e-06
759	9.004e-07	1.125e-06	1.0127e-06
760	9.004e-07	7.5e-07	8.25199e-07
761	9.004e-07	7.5e-07	8.25199e-07
762	9.004e-07	7.5e-07	8.25199e-07
763	9.004e-07	7.5e-07	8.25199e-07
764	9.004e-07	7.5e-07	8.25199e-07
765	9.004e-07	7.5e-07	8.25199e-07
766	9.004e-07	7.5e-07	8.25199e-07
767	7.71771e-07	7.5e-07	7.60884e-07
768	7.71771e-07	1.5e-06	1.13588e-06
769	7.71771e-07	1.5e-06	1.13588e-06
770	7.71771e-07	1.5e-06	1.13588e-06
771	7.71771e-07	1.5e-06	1.13588e-06
772	7.71771e-07	1.5e-06	1.13588e-06
773	7.71771e-07	1.5e-06	1.13588e-06
774	7.71771e-07	1.875e-06	1.32338e-06
775	7.71771e-07	7.875e-06	4.32337e-06
776	9.004e-07	7.875e-06	4.38769e-06
777	9.004e-07	7.875e-06	4.38769e-06
778	9.004e-07	7.875e-06	4.38769e-06
779	9.004e-07	7.875e-06	4.38769e-06
780	9.004e-07	7.875e-06	4.38769e-06
781	1.15766e-06	8.625e-06	4.89131e-06
782	1.15766e-06	8.625e-06	4.89131e-06
783	1.15766e-06	1.125e-05	6.20381e-06
784	1.15766e-06	1.125e-05	6.20381e-06
785	1.15766e-06	1.125e-05	6.20381e-06
786	1.15766e-06	1.125e-05	6.20381e-06
787	1.15766e-06	1.125e-05	6.20381e-06
788	1.15766e-06	1.125e-05	6.20381e-06
789	1.15766e-06	1.125e-05	6.20381e-06
790	1.02903e-06	1.125e-05	6.13949e-06
791	1.15766e-06	1.125e-05	6.20381e-06
792	9.004e-07	1.1625e-05	6.26268e-06
793	1.92943e-06	2.25e-05	1.22147e-05
794	1.92943e-06	2.2875e-05	1.24022e-05
795	1.92943e-06	2.325e-05	1.25897e-05
796	1.92943e-06	2.325e-05	1.25897e-05
797	2.57257e-06	3.0375e-05	1.64737e-05
798	2.7012e-06	3.1125e-05	1.6913e-05
799	6.3028e-06	4.05e-05	2.34013e-05
800	6.56006e-06	4.05e-05	2.353e-05
801	3.58874e-05	6.525e-05	5.05686e-05
802	3.88458e-05	6.9e-05	5.39228e-05
803	3.93603e-05	6.9375e-05	5.43675e-05
804	4.42482e-05	7.3125e-05	5.86865e-05
805	4.42482e-05	7.3125e-05	5.86865e-05
806	4.42482e-05	7.35e-05	5.8874e-05
807	4.47627e-05	7.425e-05	5.95062e-05
808	4.502e-05	7.5e-05	6.00099e-05
809	4.502e-05	7.5e-05	6.00099e-05
810	4.56631e-05	7.5375e-05	6.05189e-05
811	4.56631e-05	7.5375e-05	6.05189e-05
812	4.57918e-05	7.5375e-05	6.05833e-05
813	4.6049e-05	7.5375e-05	6.07119e-05
814	6.07127e-05	7.575e-05	6.82312e-05
815	6.10986e-05	7.575e-05	6.84242e-05
816	6.17417e-05	7.575e-05	6.87457e-05
817	6.17417e-05	7.575e-05	6.87457e-05
818	6.18703e-05	7.575e-05	6.881e-05
819	6.1999e-05	7.575e-05	6.88744e-05
820	6.1999e-05	7.575e-05	6.88744e-05
821	6.1999e-05	7.575e-05	6.88744e-05
822	5.44099e-05	7.2375e-05	6.33923e-05
823	5.08083e-05	6.9e-05	5.9904e-05
824	3.93603e-05	4.1625e-05	4.04926e-05
825	4.20615e-05	4.1625e-05	4.18432e-05
826	4.18043e-05	4.1625e-05	4.17146e-05
827	4.18043e-05	4.1625e-05	4.17146e-05
828	4.10325e-05	4.1625e-05	4.13287e-05
829	3.66591e-05	3.525e-05	3.59545e-05
830	3.09995e-05	2.925e-05	3.01247e-05
831	3.1514e-05	2.925e-05	3.03819e-05
832	3.12567e-05	2.925e-05	3.02533e-05
833	2.3539e-05	2.6625e-05	2.5082e-05
834	1.22197e-05	2.2125e-05	1.71723e-05
835	1.22197e-05	2.175e-05	1.69848e-05
836	1.22197e-05	2.175e-05	1.69848e-05
837	1.19625e-05	2.025e-05	1.61062e-05
838	1.19625e-05	1.9875e-05	1.59187e-05
839	1.04189e-05	1.8e-05	1.42094e-05
840	7.33183e-06	9e-06	8.1659e-06
841	9.64714e-06	9e-06	9.32356e-06
842	9.64714e-06	8.625e-06	9.13606e-06
843	9.38989e-06	8.625e-06	9.00743e-06
844	8.74674e-06	9e-06	8.87336e-06
845	6.56006e-06	2.25e-06	4.40502e-06
846	8.87537e-06	4.125e-06	6.50018e-06
847	7.71771e-06	3.75e-06	5.73385e-06
848	1.31201e-05	7.5e-06	1.031e-05
849	1.38919e-05	7.5e-06	1.06959e-05
850	1.3506e-05	7.5e-06	1.0503e-05
851	1.3506e-05	7.5e-06	1.0503e-05
852	1.31201e-05	6.375e-06	9.74755e-06
853	1.67217e-05	6.375e-06	1.15483e-05
854	1.67217e-05	6.375e-06	1.15483e-05
855	1.68503e-05	6.375e-06	1.16127e-05
856	1.68503e-05	6.375e-06	1.16127e-05
857	1.68503e-05	6.375e-06	1.16127e-05
858	1.68503e-05	6.375e-06	1.16127e-05
859	1.67217e-05	6.375e-06	1.15483e-05
860	1.65931e-05	6.375e-06	1.1484e-05
861	1.54354e-05	6e-06	1.07177e-05
862	1.67217e-05	6.375e-06	1.15483e-05
863	1.67217e-05	6.375e-06	1.15483e-05
864	1.67217e-05	6.375e-06	1.15483e-05
865	1.67217e-05	6.375e-06	1.15483e-05
866	1.67217e-05	6.375e-06	1.15483e-05
867	8.87537e-06	2.625e-06	5.75018e-06
868	8.87537e-06	2.625e-06	5.75018e-06
869	8.61811e-06	2.625e-06	5.62155e-06
870	8.61811e-06	2.625e-06	5.62155e-06
871	7.84634e-06	1.875e-06	4.86067e-06
872	7.71771e-06	1.875e-06	4.79635e-06
873	7.07457e-06	1.875e-06	4.47478e-06
874	3.47297e-06	1.5e-06	2.48648e-06
875	3.47297e-06	1.5e-06	2.48648e-06
876	2.44394e-06	1.5e-06	1.97197e-06
877	2.82983e-06	1.5e-06	2.16491e-06
878	2.82983e-06	1.5e-06	2.16491e-06
879	2.82983e-06	1.5e-06	2.16491e-06
880	3.73023e-06	1.5e-06	2.61511e-06
881	3.73023e-06	1.5e-06	2.61511e-06
882	3.73023e-06	1.5e-06	2.61511e-06
883	3.6016e-06	1.5e-06	2.5508e-06
884	3.21571e-06	3.75e-07	1.79536e-06
885	3.34434e-06	0	1.67217e-06
886	2.82983e-06	0	1.41491e-06
887	2.7012e-06	1.5e-06	2.1006e-06
888	2.57257e-06	1.5e-06	2.03628e-06
889	2.44394e-06	1.5e-06	1.97197e-06
890	2.57257e-06	2.625e-06	2.59878e-06
891	2.7012e-06	2.625e-06	2.6631e-06
892	2.82983e-06	2.625e-06	2.72741e-06
893	2.82983e-06	2.625e-06	2.72741e-06
894	4.11611e-06	2.625e-06	3.37055e-06
895	4.11611e-06	2.625e-06	3.37055e-06
896	4.11611e-06	2.625e-06	3.37055e-06
897	4.11611e-06	2.625e-06	3.37055e-06
898	3.98749e-06	2.625e-06	3.30624e-06
899	4.24474e-06	2.625e-06	3.43487e-06
900	3.98749e-06	3e-06	3.49374e-06
901	3.47297e-06	3e-06	3.23648e-06
902	5.53103e-06	1.425e-05	9.89049e-06
903	5.53103e-06	1.425e-05	9.89049e-06
904	5.53103e-06	1.425e-05	9.89049e-06
905	5.27377e-06	1.425e-05	9.76186e-06
906	5.65966e-06	1.4625e-05	1.01423e-05
907	5.53103e-06	1.4625e-05	1.0078e-05
908	7.46046e-06	1.725e-05	1.23552e-05
909	7.46046e-06	1.725e-05	1.23552e-05
910	8.36086e-06	1.8375e-05	1.33679e-05
911	8.36086e-06	1.8375e-05	1.33679e-05
912	8.36086e-06	1.8375e-05	1.33679e-05
913	7.58909e-06	1.8e-05	1.27945e-05
914	1.95515e-05	2.625e-05	2.29007e-05
915	2.18669e-05	2.6625e-05	2.42459e-05
916	2.22527e-05	2.6625e-05	2.44388e-05
917	2.28959e-05	2.6625e-05	2.47604e-05
918	2.28959e-05	2.6625e-05	2.47604e-05
919	2.18669e-05	2.6625e-05	2.42459e-05
920	2.41822e-05	2.85e-05	2.6341e-05
921	2.50826e-05	2.85e-05	2.67912e-05
922	2.48253e-05	2.775e-05	2.62876e-05
923	4.09039e-05	2.775e-05	3.43269e-05
924	4.14184e-05	2.775e-05	3.45842e-05
925	4.14184e-05	2.775e-05	3.45842e-05
926	4.14184e-05	2.775e-05	3.45842e-05
927	4.12898e-05	2.7375e-05	3.43323e-05
928	4.14184e-05	2.7375e-05	3.43967e-05
929	4.14184e-05	2.7375e-05	3.43967e-05
930	4.12898e-05	2.7375e-05	3.43323e-05
931	4.10325e-05	2.7375e-05	3.42037e-05
932	4.10325e-05	2.7375e-05	3.42037e-05
933	4.07753e-05	2.7e-05	3.38876e-05
934	3.83313e-05	2.55e-05	3.19156e-05
935	3.7045e-05	2.5125e-05	3.1085e-05
936	3.58874e-05	2.175e-05	2.88186e-05
937	2.97132e-05	1.65e-05	2.31066e-05
938	2.21241e-05	5.625e-06	1.38745e-05
939	2.34104e-05	7.875e-06	1.56427e-05
940	2.34104e-05	7.875e-06	1.56427e-05
941	2.27673e-05	6.375e-06	1.45711e-05
942	2.10951e-05	6.375e-06	1.3735e-05
943	1.10621e-05	6e-06	8.53102e-06
944	1.2477e-05	7.125e-06	9.80097e-06
945	1.22197e-05	7.125e-06	9.67234e-06
946	1.14479e-05	7.125e-06	9.28646e-06
947	1.14479e-05	7.125e-06	9.28646e-06
948	1.14479e-05	7.125e-06	9.28646e-06
949	4.75926e-06	4.5e-06	4.62962e-06
950	5.01651e-06	4.5e-06	4.75825e-06
951	5.01651e-06	4.5e-06	4.75825e-06
952	3.98749e-06	3.75e-06	3.86874e-06
953	4.502e-06	3.75e-06	4.12599e-06
954	4.502e-06	3.375e-06	3.93849e-06
955	4.37337e-06	3.375e-06	3.87418e-06
956	4.37337e-06	3.375e-06	3.87418e-06
957	4.63063e-06	3.375e-06	4.00281e-06
958	4.24474e-06	3.375e-06	3.80987e-06
959	4.37337e-06	3.375e-06	3.87418e-06
960	4.11611e-06	3e-06	3.55805e-06
961	3.98749e-06	2.625e-06	3.30624e-06
962	3.73023e-06	2.625e-06	3.17761e-06
963	2.57257e-06	2.625e-06	2.59878e-06
964	1.67217e-06	1.875e-06	1.77358e-06
965	2.18669e-06	1.5e-06	1.84334e-06
966	2.18669e-06	1.5e-06	1.84334e-06
967	1.92943e-06	1.5e-06	1.71471e-06
968	2.18669e-06	1.5e-06	1.84334e-06
969	2.18669e-06	1.875e-06	2.03084e-06
970	2.31531e-06	1.5e-06	1.90765e-06
971	3.34434e-06	2.25e-06	2.79717e-06
972	3.34434e-06	2.25e-06	2.79717e-06
973	3.73023e-06	2.25e-06	2.99011e-06
974	9.9044e-06	3.375e-06	6.63969e-06
975	1.01617e-05	3.375e-06	6.76832e-06
976	1.11907e-05	3.375e-06	7.28284e-06
977	1.11907e-05	3.375e-06	7.28284e-06
978	1.11907e-05	3.375e-06	7.28284e-06
979	1.11907e-05	3.375e-06	7.28284e-06
980	1.11907e-05	3.375e-06	7.28284e-06
981	1.11907e-05	3.375e-06	7.28284e-06
982	1.08048e-05	3.375e-06	7.08989e-06
983	1.08048e-05	3.375e-06	7.08989e-06
984	1.08048e-05	3.375e-06	7.08989e-06
985	1.06762e-05	3.375e-06	7.02558e-06
986	1.06762e-05	3.375e-06	7.02558e-06
987	1.05475e-05	3.375e-06	6.96127e-06
988	1.01617e-05	3.375e-06	6.76832e-06
989	1.02903e-05	3.375e-06	6.83264e-06
990	9.77577e-06	3.375e-06	6.57538e-06
991	9.64714e-06	3e-06	6.32357e-06
992	9.64714e-06	3e-06	6.32357e-06
993	9.26126e-06	3e-06	6.13062e-06
994	9.26126e-06	3e-06	6.13062e-06
995	6.43143e-06	3e-06	4.71571e-06
996	5.27377e-06	2.625e-06	3.94938e-06
997	3.08709e-06	1.875e-06	2.48104e-06
998	3.08709e-06	1.5e-06	2.29354e-06
999	3.08709e-06	1.5e-06	2.29354e-06
1000	2.95846e-06	1.5e-06	2.22923e-06
1001	5.14514e-07	3.75e-07	4.44756e-07
1002	5.14514e-07	0	2.57257e-07
1003	5.14514e-07	0	2.57257e-07
1004	5.14514e-07	0	2.57257e-07
1005	7.71771e-07	0	3.85886e-07
1006	9.004e-07	0	4.502e-07
1007	9.004e-07	0	4.502e-07
1008	9.004e-07	0	4.502e-07
1009	9.004e-07	0	4.502e-07
1010	1.15766e-06	0	5.78829e-07
1011	1.15766e-06	0	5.78829e-07
1012	1.15766e-06	0	5.78829e-07
1013	9.004e-07	0	4.502e-07
1014	9.004e-07	0	4.502e-07
1015	1.02903e-06	0	5.14514e-07
1016	2.57257e-06	1.125e-06	1.84878e-06
1017	2.7012e-06	1.125e-06	1.9131e-06
1018	2.7012e-06	1.125e-06	1.9131e-06
1019	2.95846e-06	1.5e-06	2.22923e-06
1020	2.95846e-06	1.5e-06	2.22923e-06
1021	2.95846e-06	1.5e-06	2.22923e-06
1022	2.95846e-06	1.5e-06	2.22923e-06
1023	2.95846e-06	1.5e-06	2.22923e-06
1024	2.95846e-06	1.5e-06	2.22923e-06
1025	2.95846e-06	1.5e-06	2.22923e-06
1026	2.82983e-06	1.5e-06	2.16491e-06
1027	2.82983e-06	1.5e-06	2.16491e-06
1028	2.7012e-06	1.5e-06	2.1006e-06
1029	2.18669e-06	1.5e-06	1.84334e-06
1030	2.57257e-06	1.875e-06	2.22378e-06
1031	2.57257e-06	1.875e-06	2.22378e-06
1032	2.57257e-06	1.875e-06	2.22378e-06
1033	2.57257e-06	1.875e-06	2.22378e-06
1034	2.82983e-06	1.875e-06	2.35241e-06
1035	2.82983e-06	1.875e-06	2.35241e-06
1036	2.82983e-06	1.5e-06	2.16491e-06
1037	2.18669e-06	1.125e-06	1.65584e-06
1038	2.31531e-06	1.125e-06	1.72016e-06
1039	2.05806e-06	1.125e-06	1.59153e-06
1040	2.18669e-06	1.5e-06	1.84334e-06
1041	1.54354e-06	1.5e-06	1.52177e-06
1042	3.47297e-06	1.2e-05	7.73646e-06
1043	3.73023e-06	1.2e-05	7.86509e-06
1044	3.85886e-06	1.2e-05	7.92941e-06
1045	3.6016e-06	1.1625e-05	7.61328e-06
1046	3.98749e-06	1.725e-05	1.06187e-05
1047	4.11611e-06	1.7625e-05	1.08705e-05
1048	3.98749e-06	1.875e-05	1.13687e-05
1049	1.63358e-05	0.00014025	7.82927e-05
1050	1.67217e-05	0.000144	8.03606e-05
1051	1.68503e-05	0.00014512	8.09874e-05
1052	1.68503e-05	0.00014512	8.09874e-05
1053	1.68503e-05	0.00014512	8.09874e-05
1054	1.68503e-05	0.00014512	8.09874e-05
1055	1.68503e-05	0.00014512	8.09874e-05
1056	1.68503e-05	0.00014512	8.09874e-05
1057	1.67217e-05	0.00014512	8.09231e-05
1058	1.65931e-05	0.0001455	8.10463e-05
1059	1.73649e-05	0.00014812	8.27447e-05
1060	1.74935e-05	0.0001485	8.29965e-05
1061	1.8008e-05	0.00014887	8.34412e-05
1062	3.74309e-05	0.0001935	0.000115465
1063	4.37337e-05	0.00020587	0.000124804
1064	4.38623e-05	0.00020812	0.000125993
1065	7.26751e-05	0.00027525	0.000173962
1066	7.51191e-05	0.00028387	0.000179497
1067	7.51191e-05	0.00028387	0.000179497
1068	7.5505e-05	0.000285	0.000180252
1069	7.52477e-05	0.000285	0.000180123
1070	7.52477e-05	0.000285	0.000180123
1071	7.52477e-05	0.000285	0.000180123
1072	7.37042e-05	0.000285	0.000179352
1073	7.33183e-05	0.000285	0.000179159
1074	7.31897e-05	0.000285	0.000179094
1075	6.8559e-05	0.000276	0.000172279
1076	7.16461e-05	0.00027637	0.00017401
1077	7.16461e-05	0.000276	0.000173823
1078	7.16461e-05	0.000276	0.000173823
1079	7.17747e-05	0.00027562	0.000173699
1080	7.03598e-05	0.00026775	0.000169054
1081	6.95881e-05	0.0002625	0.000166044
1082	6.93308e-05	0.00026212	0.000165727
1083	6.83018e-05	0.00026062	0.000164463
1084	6.63723e-05	0.000258	0.000162186
1085	3.55015e-05	0.0001785	0.000107
1086	4.03894e-05	0.00017812	0.000109257
1087	4.02607e-05	0.00017775	0.000109005
1088	4.0518e-05	0.000177	0.000108759
1089	3.87172e-05	0.000171	0.000104858
1090	3.20285e-05	0.00014287	8.74515e-05
1091	2.98418e-05	0.00013012	7.99832e-05
1092	1.72362e-05	6.7875e-05	4.25555e-05
1093	1.82653e-05	6.7875e-05	4.307e-05
1094	1.81366e-05	6.375e-05	4.09432e-05
1095	1.64645e-05	5.0625e-05	3.35446e-05
1096	1.32487e-05	2.175e-05	1.74993e-05
1097	1.51782e-05	2.175e-05	1.8464e-05
1098	1.53068e-05	2.0625e-05	1.79659e-05
1099	1.29915e-05	4.875e-06	8.93323e-06
1100	1.32487e-05	4.875e-06	9.06186e-06
1101	1.28629e-05	4.125e-06	8.49392e-06
1102	1.41491e-05	4.875e-06	9.51206e-06
1103	1.40205e-05	4.5e-06	9.26025e-06
1104	1.44064e-05	4.875e-06	9.64069e-06
1105	1.28629e-05	2.625e-06	7.74392e-06
1106	1.78794e-05	2.625e-06	1.02522e-05
1107	1.8008e-05	2.625e-06	1.03165e-05
1108	1.81366e-05	2.625e-06	1.03808e-05
1109	1.81366e-05	2.625e-06	1.03808e-05
1110	1.40205e-05	1.5e-06	7.76025e-06
1111	1.36346e-05	1.5e-06	7.56731e-06
1112	1.08048e-05	1.125e-06	5.9649e-06
1113	1.62072e-05	3.375e-06	9.79109e-06
1114	1.62072e-05	5.25e-06	1.07286e-05
1115	1.98088e-05	1.125e-05	1.55294e-05
1116	2.45681e-05	1.9125e-05	2.18465e-05
1117	2.3539e-05	1.9125e-05	2.1332e-05
1118	3.76882e-05	4.0875e-05	3.92815e-05
1119	3.75595e-05	4.0875e-05	3.92172e-05
1120	3.83313e-05	4.35e-05	4.09156e-05
1121	6.05841e-05	0.00012825	9.44168e-05
1122	6.07127e-05	0.00012937	9.50436e-05
1123	6.08413e-05	0.00013012	9.54829e-05
1124	6.09699e-05	0.00013012	9.55472e-05
1125	6.03268e-05	0.00013012	9.52257e-05
1126	8.27082e-05	0.000186	0.000134354
1127	8.46376e-05	0.00018825	0.000136443
1128	9.01686e-05	0.00019387	0.000142021
1129	9.06831e-05	0.00019425	0.000142466
1130	0.000106633	0.00022425	0.000165441
1131	0.000108177	0.00022575	0.000166963
1132	0.000108048	0.00022575	0.000166899
1133	0.000108177	0.00022575	0.000166963
1134	0.000107919	0.00022575	0.000166834
1135	0.000107791	0.00022575	0.00016677
1136	0.000107405	0.00022575	0.000166577
1137	9.77577e-05	0.00022537	0.000161566
1138	9.28698e-05	0.00022575	0.00015931
1139	0.000115123	0.00024375	0.000179436
1140	0.000119367	0.0002445	0.000181933
1141	0.000119367	0.0002445	0.000181933
1142	0.000119625	0.0002445	0.000182062
1143	0.000120268	0.0002445	0.000182383
1144	0.000120268	0.0002445	0.000182383
1145	0.00011628	0.00024262	0.000179452
1146	0.000115508	0.0002415	0.000178504
1147	0.00011255	0.00024	0.000176275
1148	8.03929e-05	0.00021525	0.000147821
1149	8.15505e-05	0.00021787	0.000149712
1150	8.07787e-05	0.00021562	0.000148201
1151	5.35095e-05	0.000186	0.000119754
1152	5.37667e-05	0.000186	0.000119883
1153	5.22232e-05	0.00018112	0.000116674
1154	5.27377e-05	0.00018375	0.000118244
1155	5.27377e-05	0.00018375	0.000118244
1156	5.11942e-05	0.00016762	0.000109409
1157	5.22232e-05	0.00016612	0.000109174
1158	5.22232e-05	0.00016612	0.000109174
1159	5.15801e-05	0.000159	0.00010529
1160	5.0551e-05	0.00015825	0.0001044
1161	5.0551e-05	0.00015825	0.0001044
1162	4.75926e-05	0.00015037	9.89835e-05
1163	1.27342e-05	6.1125e-05	3.69295e-05
1164	1.28629e-05	6e-05	3.64313e-05
1165	1.14479e-05	5.2125e-05	3.17864e-05
1166	9.26126e-06	3.9e-05	2.41306e-05
1167	1.15766e-05	4.0125e-05	2.58507e-05
1168	1.14479e-05	4.0125e-05	2.57864e-05
1169	6.94594e-06	1.3875e-05	1.04104e-05
1170	8.74674e-06	1.425e-05	1.14983e-05
1171	8.87537e-06	1.425e-05	1.15627e-05
1172	9.26126e-06	1.2e-05	1.06306e-05
1173	1.10621e-05	1.4625e-05	1.28435e-05
1174	1.19625e-05	1.6875e-05	1.44187e-05
1175	1.19625e-05	1.6125e-05	1.40437e-05
1176	1.05475e-05	1.425e-05	1.23987e-05
1177	1.09334e-05	1.65e-05	1.37167e-05
1178	1.09334e-05	1.65e-05	1.37167e-05
1179	1.09334e-05	1.65e-05	1.37167e-05
1180	1.06762e-05	1.65e-05	1.35881e-05
1181	1.06762e-05	1.65e-05	1.35881e-05
1182	9.9044e-06	1.3125e-05	1.15147e-05
1183	1.01617e-05	1.3125e-05	1.16433e-05
1184	1.01617e-05	1.275e-05	1.14558e-05
1185	1.01617e-05	1.275e-05	1.14558e-05
1186	9.38989e-06	1.125e-05	1.03199e-05
1187	9.64714e-06	1.125e-05	1.04486e-05
1188	9.64714e-06	1.125e-05	1.04486e-05
1189	9.64714e-06	1.125e-05	1.04486e-05
1190	9.64714e-06	1.125e-05	1.04486e-05
1191	7.84634e-06	1.125e-05	9.54815e-06
1192	7.84634e-06	1.125e-05	9.54815e-06
1193	7.71771e-06	1.0125e-05	8.92134e-06
1194	7.58909e-06	1.0125e-05	8.85702e-06
1195	5.14514e-06	6.75e-06	5.94756e-06
1196	5.01651e-06	6.75e-06	5.88325e-06
1197	4.88789e-06	6.375e-06	5.63143e-06
1198	1.8008e-06	7.5e-07	1.2754e-06
1199	1.92943e-06	3.75e-07	1.15221e-06
1200	1.02903e-06	3.75e-07	7.02014e-07
1201	1.41491e-06	3.75e-07	8.94956e-07
1202	1.41491e-06	3.75e-07	8.94956e-07
1203	3.34434e-06	3.75e-07	1.85967e-06
1204	3.34434e-06	3.75e-07	1.85967e-06
1205	3.34434e-06	3.75e-07	1.85967e-06
1206	3.21571e-06	3.75e-07	1.79536e-06
1207	3.34434e-06	3.75e-07	1.85967e-06
1208	3.73023e-06	3.75e-07	2.05261e-06
1209	3.98749e-06	3.75e-07	2.18124e-06
1210	4.11611e-06	3.75e-07	2.24556e-06
1211	3.98749e-06	3.75e-07	2.18124e-06
1212	4.24474e-06	3.75e-07	2.30987e-06
1213	4.24474e-06	3.75e-07	2.30987e-06
1214	4.11611e-06	3.75e-07	2.24556e-06
1215	4.11611e-06	3.75e-07	2.24556e-06
1216	4.11611e-06	3.75e-07	2.24556e-06
1217	4.24474e-06	3.75e-07	2.30987e-06
1218	4.24474e-06	3.75e-07	2.30987e-06
1219	3.98749e-06	3.75e-07	2.18124e-06
1220	1.44064e-05	7.5e-07	7.5782e-06
1221	1.46637e-05	7.5e-07	7.70683e-06
1222	1.44064e-05	7.5e-07	7.5782e-06
1223	1.44064e-05	7.5e-07	7.5782e-06
1224	1.42778e-05	7.5e-07	7.51388e-06
1225	1.42778e-05	7.5e-07	7.51388e-06
1226	1.42778e-05	7.5e-07	7.51388e-06
1227	1.42778e-05	7.5e-07	7.51388e-06
1228	1.2477e-05	7.5e-07	6.61348e-06
1229	1.20911e-05	3.75e-07	6.23304e-06
1230	1.17052e-05	3.75e-07	6.0401e-06
1231	1.22197e-05	3.75e-07	6.29736e-06
1232	1.2477e-05	3.75e-07	6.42598e-06
1233	2.61116e-05	3.75e-06	1.49308e-05
1234	2.67547e-05	3.75e-06	1.52524e-05
1235	2.75265e-05	4.125e-06	1.58257e-05
1236	2.75265e-05	4.125e-06	1.58257e-05
1237	2.73979e-05	4.125e-06	1.57614e-05
1238	2.73979e-05	4.125e-06	1.57614e-05
1239	2.55971e-05	4.125e-06	1.4861e-05
1240	2.55971e-05	4.125e-06	1.4861e-05
1241	2.52112e-05	4.125e-06	1.46681e-05
1242	2.50826e-05	4.125e-06	1.46038e-05
1243	2.17382e-05	3.75e-06	1.27441e-05
1244	2.27673e-05	3.75e-06	1.32586e-05
1245	2.30245e-05	3.75e-06	1.33872e-05
1246	2.30245e-05	3.75e-06	1.33872e-05
1247	2.30245e-05	3.75e-06	1.33872e-05
1248	2.30245e-05	3.75e-06	1.33872e-05
1249	2.26386e-05	3.75e-06	1.31943e-05
1250	2.21241e-05	3.75e-06	1.2937e-05
1251	2.19955e-05	3.75e-06	1.28727e-05
1252	2.09665e-05	3.75e-06	1.23582e-05
1253	2.08378e-05	3.75e-06	1.22939e-05
1254	1.71076e-05	3.75e-06	1.04288e-05
1255	3.08709e-06	2.25e-06	2.66854e-06
1256	3.34434e-06	1.875e-06	2.60967e-06
1257	3.34434e-06	1.875e-06	2.60967e-06
1258	3.47297e-06	1.875e-06	2.67398e-06
1259	2.57257e-06	7.5e-07	1.66128e-06
1260	5.01651e-06	1.125e-06	3.07076e-06
1261	4.88789e-06	1.125e-06	3.00644e-06
1262	4.88789e-06	1.125e-06	3.00644e-06
1263	4.75926e-06	1.125e-06	2.94213e-06
1264	3.98749e-06	1.125e-06	2.55624e-06
1265	4.75926e-06	1.125e-06	2.94213e-06
1266	4.75926e-06	1.125e-06	2.94213e-06
1267	4.502e-06	1.125e-06	2.8135e-06
1268	5.4024e-06	1.875e-06	3.6387e-06
1269	5.4024e-06	1.875e-06	3.6387e-06
1270	5.4024e-06	1.875e-06	3.6387e-06
1271	5.4024e-06	1.875e-06	3.6387e-06
1272	5.4024e-06	1.875e-06	3.6387e-06
1273	5.27377e-06	1.875e-06	3.57438e-06
1274	5.27377e-06	1.875e-06	3.57438e-06
1275	5.01651e-06	1.875e-06	3.44575e-06
1276	5.4024e-06	3e-06	4.20119e-06
1277	5.4024e-06	3e-06	4.20119e-06
1278	7.07457e-06	1.05e-05	8.78727e-06
1279	7.2032e-06	1.05e-05	8.85158e-06
1280	7.2032e-06	1.05e-05	8.85158e-06
1281	7.2032e-06	1.05e-05	8.85158e-06
1282	7.2032e-06	1.05e-05	8.85158e-06
1283	6.3028e-06	1.0125e-05	8.21388e-06
1284	6.3028e-06	1.2375e-05	9.33888e-06
1285	5.91691e-06	1.2375e-05	9.14594e-06
1286	5.65966e-06	1.3125e-05	9.39231e-06
1287	2.97132e-05	2.4375e-05	2.70441e-05
1288	3.03563e-05	2.4375e-05	2.73656e-05
1289	2.97132e-05	2.4375e-05	2.70441e-05
1290	3.0485e-05	2.925e-05	2.98674e-05
1291	3.06136e-05	2.9625e-05	3.01192e-05
1292	3.0485e-05	3e-05	3.02424e-05
1293	3.08709e-05	3.15e-05	3.11854e-05
1294	3.09995e-05	3.2625e-05	3.18122e-05
1295	3.09995e-05	3.3375e-05	3.21872e-05
1296	3.09995e-05	3.3375e-05	3.21872e-05
1297	3.08709e-05	3.3e-05	3.19354e-05
1298	2.81697e-05	3.3e-05	3.05848e-05
1299	2.86842e-05	3.4875e-05	3.17795e-05
1300	2.89414e-05	3.75e-05	3.32206e-05
1301	3.09995e-05	5.4e-05	4.24996e-05
1302	3.12567e-05	5.4e-05	4.26283e-05
1303	3.12567e-05	5.4e-05	4.26283e-05
1304	3.12567e-05	5.4e-05	4.26283e-05
1305	3.13854e-05	5.175e-05	4.15676e-05
1306	5.64679e-05	0.00013162	9.40462e-05
1307	5.60821e-05	0.000135	9.55408e-05
1308	5.62107e-05	0.00013575	9.59801e-05
1309	5.55675e-05	0.00013537	9.5471e-05
1310	5.44099e-05	0.00013537	9.48922e-05
1311	3.65305e-05	0.00013087	8.37025e-05
1312	3.51156e-05	0.00012975	8.24326e-05
1313	4.61777e-05	0.00013837	9.22761e-05
1314	4.61777e-05	0.00013837	9.22761e-05
1315	4.61777e-05	0.00013837	9.22761e-05
1316	4.61777e-05	0.00013837	9.22761e-05
1317	4.61777e-05	0.000138	9.20886e-05
1318	4.61777e-05	0.00013687	9.15261e-05
1319	4.61777e-05	0.00013687	9.15261e-05
1320	4.6049e-05	0.00013575	9.08993e-05
1321	4.57918e-05	0.00013462	9.02081e-05
1322	4.43769e-05	0.000132	8.81882e-05
1323	4.27047e-05	0.00012712	8.49146e-05
1324	4.24474e-05	0.00012675	8.45985e-05
1325	3.61446e-05	0.000108	7.20721e-05
1326	3.69164e-05	0.00011137	7.41455e-05
1327	3.48583e-05	0.00010537	7.01165e-05
1328	3.48583e-05	0.00010537	7.01165e-05
1329	3.34434e-05	0.000105	6.92215e-05
1330	3.28003e-05	0.00010462	6.87125e-05
1331	2.39249e-05	7.4625e-05	4.92748e-05
1332	5.78829e-06	3.3375e-05	1.95816e-05
1333	5.91691e-06	3.45e-05	2.02084e-05
1334	5.65966e-06	3.1875e-05	1.87673e-05
1335	5.91691e-06	3.1125e-05	1.85209e-05
1336	4.75926e-06	2.775e-05	1.62546e-05
1337	5.14514e-06	2.8125e-05	1.6635e-05
1338	5.14514e-06	2.8125e-05	1.6635e-05
1339	5.14514e-06	2.8125e-05	1.6635e-05
1340	4.24474e-06	2.2875e-05	1.35598e-05
1341	3.73023e-06	1.725e-05	1.04901e-05
1342	3.73023e-06	1.575e-05	9.74009e-06
1343	3.73023e-06	1.575e-05	9.74009e-06
1344	3.85886e-06	1.575e-05	9.8044e-06
1345	3.85886e-06	1.1625e-05	7.74191e-06
1346	3.47297e-06	1.0125e-05	6.79897e-06
1347	2.18669e-06	6.75e-06	4.46833e-06
1348	2.95846e-06	6.75e-06	4.85422e-06
1349	3.6016e-06	4.875e-06	4.23829e-06
1350	5.91691e-06	7.125e-06	6.52094e-06
1351	5.78829e-06	7.5e-06	6.64413e-06
1352	5.91691e-06	7.5e-06	6.70844e-06
1353	5.91691e-06	7.125e-06	6.52094e-06
1354	5.65966e-06	7.125e-06	6.39232e-06
1355	6.04554e-06	6.375e-06	6.21026e-06
1356	7.07457e-06	8.625e-06	7.84977e-06
1357	7.46046e-06	7.875e-06	7.66771e-06
1358	1.11907e-05	1.6875e-05	1.40328e-05
1359	1.11907e-05	1.6875e-05	1.40328e-05
1360	1.11907e-05	1.6875e-05	1.40328e-05
1361	1.11907e-05	1.6875e-05	1.40328e-05
1362	1.11907e-05	1.6875e-05	1.40328e-05
1363	1.10621e-05	1.6875e-05	1.39685e-05
1364	1.11907e-05	1.6875e-05	1.40328e-05
1365	1.11907e-05	1.6875e-05	1.40328e-05
1366	1.11907e-05	1.6875e-05	1.40328e-05
1367	1.11907e-05	1.6875e-05	1.40328e-05
1368	1.0033e-05	1.65e-05	1.32665e-05
1369	1.19625e-05	1.7625e-05	1.47937e-05
1370	1.20911e-05	1.7625e-05	1.4858e-05
1371	1.22197e-05	1.7625e-05	1.49223e-05
1372	1.15766e-05	1.725e-05	1.44133e-05
1373	1.14479e-05	1.725e-05	1.43489e-05
1374	1.13193e-05	1.725e-05	1.42846e-05
1375	1.01617e-05	1.4625e-05	1.23933e-05
1376	1.13193e-05	1.4625e-05	1.29721e-05
1377	1.05475e-05	1.3875e-05	1.22112e-05
1378	2.30245e-05	2.175e-05	2.23872e-05
1379	2.32818e-05	2.175e-05	2.25158e-05
1380	2.34104e-05	2.175e-05	2.25802e-05
1381	2.34104e-05	2.2125e-05	2.27677e-05
1382	2.34104e-05	2.2125e-05	2.27677e-05
1383	2.32818e-05	2.2125e-05	2.27033e-05
1384	2.16096e-05	2.1375e-05	2.14923e-05
1385	4.30906e-05	3.525e-05	3.91702e-05
1386	4.6049e-05	3.7875e-05	4.19619e-05
1387	4.6049e-05	3.825e-05	4.21494e-05
1388	4.64349e-05	3.8625e-05	4.25299e-05
1389	4.63063e-05	3.8625e-05	4.24656e-05
1390	4.64349e-05	3.8625e-05	4.25299e-05
1391	4.57918e-05	3.825e-05	4.20208e-05
1392	4.68208e-05	3.6375e-05	4.15978e-05
1393	4.92647e-05	3.6375e-05	4.28198e-05
1394	5.01651e-05	3.6375e-05	4.327e-05
1395	5.06797e-05	3.6375e-05	4.35273e-05
1396	4.9522e-05	3.4875e-05	4.21984e-05
1397	5.00365e-05	3.4875e-05	4.24557e-05
1398	4.97793e-05	3.4875e-05	4.23271e-05
1399	4.36051e-05	2.775e-05	3.56775e-05
1400	6.03268e-05	3.15e-05	4.59133e-05
1401	6.08413e-05	3.1125e-05	4.59831e-05
1402	6.09699e-05	3.1125e-05	4.60474e-05
1403	6.10986e-05	2.8875e-05	4.49867e-05
1404	6.08413e-05	2.7375e-05	4.41081e-05
1405	5.17087e-05	1.8375e-05	3.50418e-05
1406	6.08413e-05	1.9875e-05	4.03581e-05
1407	6.67582e-05	1.9875e-05	4.33166e-05
1408	7.13889e-05	1.9875e-05	4.56319e-05
1409	7.89779e-05	2.0625e-05	4.98014e-05
1410	7.93638e-05	1.9875e-05	4.96194e-05
1411	7.98783e-05	1.9875e-05	4.98766e-05
1412	8.1036e-05	1.9875e-05	5.04555e-05
1413	8.09074e-05	2.025e-05	5.05786e-05
1414	8.0007e-05	1.9125e-05	4.95659e-05
1415	7.76917e-05	1.65e-05	4.70958e-05
1416	7.13889e-05	1.5e-05	4.31944e-05
1417	7.47332e-05	1.875e-05	4.67416e-05
1418	7.44759e-05	1.875e-05	4.66129e-05
1419	7.39614e-05	1.875e-05	4.63557e-05
1420	7.38328e-05	1.875e-05	4.62914e-05
1421	6.37998e-05	1.8e-05	4.08999e-05
1422	6.62437e-05	1.9125e-05	4.26843e-05
1423	6.28994e-05	1.9125e-05	4.10122e-05
1424	6.28994e-05	1.9125e-05	4.10122e-05
1425	6.18703e-05	1.9125e-05	4.04976e-05
1426	6.14845e-05	1.95e-05	4.04922e-05
1427	3.84599e-05	1.9125e-05	2.87924e-05
1428	3.52442e-05	1.95e-05	2.73721e-05
1429	2.32818e-05	1.65e-05	1.98909e-05
1430	2.43108e-05	2.175e-05	2.30304e-05
1431	2.39249e-05	2.175e-05	2.28374e-05
1432	2.37963e-05	2.175e-05	2.27731e-05
1433	2.21241e-05	2.1e-05	2.1562e-05
1434	1.72362e-05	2.0625e-05	1.89306e-05
1435	1.67217e-05	2.0625e-05	1.86733e-05
1436	1.13193e-05	1.725e-05	1.42846e-05
1437	1.14479e-05	2.25e-05	1.69739e-05
1438	1.14479e-05	2.25e-05	1.69739e-05
1439	1.14479e-05	2.25e-05	1.69739e-05
1440	1.14479e-05	2.25e-05	1.69739e-05
1441	9.13263e-06	2.2125e-05	1.56288e-05
1442	4.24474e-06	1.425e-05	9.24735e-06
1443	7.2032e-06	2.325e-05	1.52266e-05
1444	7.71771e-06	2.4375e-05	1.60463e-05
1445	8.61811e-06	2.6625e-05	1.76215e-05
1446	9.26126e-06	2.7e-05	1.81306e-05
1447	9.38989e-06	2.7e-05	1.81949e-05
1448	3.17713e-05	0.0001245	7.81354e-05
1449	3.28003e-05	0.00012487	7.88374e-05
1450	3.28003e-05	0.00012525	7.90249e-05
1451	3.28003e-05	0.00012562	7.92124e-05
1452	3.28003e-05	0.00012562	7.92124e-05
1453	3.30575e-05	0.00012375	7.84036e-05
1454	6.05841e-05	0.00024525	0.000152917
1455	6.1999e-05	0.0002535	0.000157749
1456	6.81731e-05	0.0002775	0.000172836
1457	8.16791e-05	0.00029587	0.000188777
1458	8.23223e-05	0.00029662	0.000189473
1459	8.25795e-05	0.00029662	0.000189602
1460	8.27082e-05	0.000297	0.000189854
1461	8.27082e-05	0.000297	0.000189854
1462	8.30941e-05	0.00029812	0.000190609
1463	9.93013e-05	0.00030937	0.000204338
1464	9.95585e-05	0.00030937	0.000204466
1465	9.94299e-05	0.00030937	0.000204402
1466	9.95585e-05	0.00030937	0.000204466
1467	9.89154e-05	0.00030862	0.00020377
1468	9.004e-05	0.00030337	0.000196707
1469	9.08118e-05	0.000306	0.000198405
1470	9.06831e-05	0.0003045	0.000197591
1471	8.38658e-05	0.00028575	0.000184807
1472	8.63098e-05	0.0002985	0.000192404
1473	7.79489e-05	0.0002895	0.000183724
1474	6.79159e-05	0.00026775	0.000167832
1475	9.40275e-05	0.00040237	0.000248201
1476	9.4542e-05	0.00040612	0.000250333
1477	9.11977e-05	0.00040462	0.000247911
1478	9.1069e-05	0.00040462	0.000247846
1479	8.97827e-05	0.00040312	0.000246453
1480	8.97827e-05	0.00040237	0.000246078
1481	8.88823e-05	0.00040312	0.000246003
1482	8.83678e-05	0.00040237	0.000245371
1483	6.13558e-05	0.00033337	0.000197365
1484	8.57953e-05	0.00033862	0.00021221
1485	9.36416e-05	0.0003405	0.00021707
1486	8.78533e-05	0.000303	0.000195426
1487	9.77577e-05	0.000303	0.000200378
1488	9.81436e-05	0.00030037	0.000199259
1489	8.87537e-05	0.00024037	0.000164564
1490	0.000112679	0.0002415	0.000177089
1491	0.000113193	0.00024075	0.000176971
1492	0.000108691	0.00019687	0.000152783
1493	0.000150367	0.00020025	0.000175308
1494	0.000155641	0.0001995	0.00017757
1495	0.000166445	0.0001995	0.000182972
1496	0.000168503	0.00019875	0.000183626
1497	0.000169661	0.00019837	0.000184018
1498	0.000225486	0.00020025	0.000212868
1499	0.000226772	0.0001995	0.000213136
1500	0.000227029	0.0001995	0.000213264
1501	0.000227029	0.0001995	0.000213264
1502	0.000227158	0.0001995	0.000213329
1503	0.000226772	0.0001995	0.000213136
1504	0.000216482	0.00019012	0.000203303
1505	0.000220341	0.00019012	0.000205233
1506	0.000220469	0.00019012	0.000205297
1507	0.000220469	0.00019012	0.000205297
1508	0.00021944	0.00018975	0.000204595
1509	0.000218926	0.00018975	0.000204338
1510	0.000218025	0.000189	0.000203512
1511	0.000217768	0.000189	0.000203384
1512	0.000204905	0.0001815	0.000193202
1513	0.000197445	0.000174	0.000185722
1514	0.000184196	0.00015525	0.000169723
1515	0.00018381	0.00015525	0.00016953
1516	0.000181752	0.00015262	0.000167188
1517	0.000123869	0.00010537	0.000114622
1518	7.26751e-05	4.425e-05	5.84625e-05
1519	7.37042e-05	4.425e-05	5.8977e-05
1520	5.89119e-05	1.05e-05	3.47059e-05
1521	6.41857e-05	1.6125e-05	4.01553e-05
1522	6.12272e-05	1.4625e-05	3.79261e-05
1523	5.67252e-05	1.4625e-05	3.56751e-05
1524	5.45385e-05	1.4625e-05	3.45817e-05
1525	2.76551e-05	1.2e-05	1.98275e-05
1526	4.0518e-05	1.6875e-05	2.86965e-05
1527	4.10325e-05	1.6875e-05	2.89537e-05
1528	4.10325e-05	1.65e-05	2.87662e-05
1529	4.14184e-05	1.65e-05	2.89592e-05
1530	4.12898e-05	1.65e-05	2.88949e-05
1531	4.14184e-05	1.65e-05	2.89592e-05
1532	4.55345e-05	1.65e-05	3.10172e-05
1533	4.70781e-05	1.65e-05	3.1789e-05
1534	4.72067e-05	1.65e-05	3.18533e-05
1535	4.77212e-05	1.65e-05	3.21106e-05
1536	4.78498e-05	1.65e-05	3.21749e-05
1537	4.77212e-05	1.65e-05	3.21106e-05
1538	4.69494e-05	1.575e-05	3.13497e-05
1539	4.69494e-05	1.575e-05	3.13497e-05
1540	4.41196e-05	1.425e-05	2.91848e-05
1541	4.3991e-05	1.425e-05	2.91205e-05
1542	4.23188e-05	1.425e-05	2.82844e-05
1543	2.55971e-05	7.125e-06	1.6361e-05
1544	2.7012e-05	1.0875e-05	1.89435e-05
1545	2.71406e-05	1.1625e-05	1.93828e-05
1546	2.62402e-05	1.1625e-05	1.89326e-05
1547	2.5983e-05	1.1625e-05	1.8804e-05
1548	2.61116e-05	1.1625e-05	1.88683e-05
1549	2.61116e-05	1.1625e-05	1.88683e-05
1550	2.54685e-05	1.1625e-05	1.85467e-05
1551	2.27673e-05	1.0125e-05	1.64461e-05
1552	2.19955e-05	9.75e-06	1.58727e-05
1553	2.19955e-05	9.75e-06	1.58727e-05
1554	2.1481e-05	9.75e-06	1.56155e-05
1555	4.11611e-06	6e-06	5.05805e-06
1556	4.502e-06	6.375e-06	5.43849e-06
1557	4.37337e-06	6.375e-06	5.37417e-06
1558	3.6016e-06	5.25e-06	4.42579e-06
1559	5.65966e-06	7.5e-06	6.57982e-06
1560	5.65966e-06	7.5e-06	6.57982e-06
1561	5.65966e-06	7.5e-06	6.57982e-06
1562	5.65966e-06	7.5e-06	6.57982e-06
1563	5.53103e-06	7.5e-06	6.5155e-06
1564	5.27377e-06	6.75e-06	6.01187e-06
1565	5.53103e-06	8.625e-06	7.078e-06
1566	5.53103e-06	8.625e-06	7.078e-06
1567	5.27377e-06	8.625e-06	6.94937e-06
1568	5.14514e-06	7.125e-06	6.13506e-06
1569	5.4024e-06	7.125e-06	6.26369e-06
1570	5.14514e-06	7.125e-06	6.13506e-06
1571	4.63063e-06	5.625e-06	5.1278e-06
1572	5.14514e-06	7.125e-06	6.13506e-06
1573	4.88789e-06	6.75e-06	5.81893e-06
1574	7.33183e-06	2.2875e-05	1.51034e-05
1575	7.33183e-06	2.4375e-05	1.58534e-05
1576	7.2032e-06	2.5125e-05	1.61641e-05
1577	7.71771e-06	2.9625e-05	1.86713e-05
1578	7.71771e-06	3.0375e-05	1.90463e-05
1579	6.56006e-06	3.1875e-05	1.92175e-05
1580	7.46046e-06	3.525e-05	2.13552e-05
1581	7.46046e-06	3.525e-05	2.13552e-05
1582	1.29915e-05	5.9625e-05	3.63081e-05
1583	1.29915e-05	6.1125e-05	3.70581e-05
1584	1.32487e-05	6.15e-05	3.73743e-05
1585	1.32487e-05	6.15e-05	3.73743e-05
1586	1.32487e-05	6.15e-05	3.73743e-05
1587	1.32487e-05	6.15e-05	3.73743e-05
1588	1.32487e-05	6.15e-05	3.73743e-05
1589	1.22197e-05	6.15e-05	3.68597e-05
1590	2.26386e-05	8.5875e-05	5.42567e-05
1591	2.89414e-05	9.7875e-05	6.3408e-05
1592	3.02277e-05	0.00010012	6.51762e-05
1593	3.07422e-05	0.00010125	6.59959e-05
1594	3.1514e-05	0.00010125	6.63818e-05
1595	3.13854e-05	0.00010162	6.6505e-05
1596	3.85886e-05	0.00010575	7.21691e-05
1597	3.88458e-05	0.00010575	7.22977e-05
1598	3.88458e-05	0.00010575	7.22977e-05
1599	3.88458e-05	0.00010575	7.22977e-05
1600	3.89745e-05	0.00010575	7.2362e-05
1601	3.74309e-05	0.00010575	7.15903e-05
1602	3.57587e-05	0.00010537	7.05667e-05
1603	5.20946e-05	0.00010687	7.94846e-05
1604	5.20946e-05	0.00010575	7.89221e-05
1605	5.22232e-05	0.00010575	7.89864e-05
1606	5.24805e-05	0.00010575	7.9115e-05
1607	5.24805e-05	0.00010575	7.9115e-05
1608	5.13228e-05	0.0001035	7.74112e-05
1609	5.13228e-05	0.0001035	7.74112e-05
1610	5.09369e-05	0.00010312	7.70308e-05
1611	5.02938e-05	0.00010275	7.65217e-05
1612	4.24474e-05	8.6625e-05	6.45361e-05
1613	3.48583e-05	6.375e-05	4.93041e-05
1614	3.48583e-05	6.375e-05	4.93041e-05
1615	3.31862e-05	5.4375e-05	4.37805e-05
1616	2.34104e-05	1.0875e-05	1.71427e-05
1617	2.64975e-05	1.2e-05	1.92487e-05
1618	2.67547e-05	1.2375e-05	1.95648e-05
1619	2.7012e-05	1.2375e-05	1.96935e-05
1620	2.57257e-05	1.0125e-05	1.79253e-05
1621	2.61116e-05	1.05e-05	1.83058e-05
1622	2.54685e-05	9.75e-06	1.76092e-05
1623	2.44394e-05	9.375e-06	1.69072e-05
1624	2.21241e-05	8.25e-06	1.5187e-05
1625	1.06762e-05	7.5e-06	9.08807e-06
1626	2.17382e-05	1.35e-05	1.76191e-05
1627	2.79124e-05	1.425e-05	2.10812e-05
1628	2.84269e-05	1.425e-05	2.13384e-05
1629	2.91987e-05	1.425e-05	2.17243e-05
1630	3.07422e-05	1.425e-05	2.24961e-05
1631	3.0485e-05	1.3875e-05	2.218e-05
1632	3.09995e-05	1.3875e-05	2.24372e-05
1633	3.07422e-05	1.3875e-05	2.23086e-05
1634	2.95846e-05	1.3875e-05	2.17298e-05
1635	3.46011e-05	1.5375e-05	2.4988e-05
1636	3.47297e-05	1.5375e-05	2.50523e-05
1637	3.47297e-05	1.5375e-05	2.50523e-05
1638	3.47297e-05	1.5375e-05	2.50523e-05
1639	3.48583e-05	1.5375e-05	2.51166e-05
1640	3.48583e-05	1.5375e-05	2.51166e-05
1641	3.46011e-05	1.5e-05	2.48005e-05
1642	3.46011e-05	1.5e-05	2.48005e-05
1643	3.42152e-05	1.4625e-05	2.44201e-05
1644	3.06136e-05	1.2375e-05	2.14943e-05
1645	3.0485e-05	1.2e-05	2.12425e-05
1646	1.96802e-05	3.75e-06	1.17151e-05
1647	2.17382e-05	4.5e-06	1.31191e-05
1648	1.65931e-05	3.75e-06	1.01715e-05
1649	2.58543e-05	3.75e-06	1.48022e-05
1650	2.61116e-05	3.75e-06	1.49308e-05
1651	2.45681e-05	3.75e-06	1.4159e-05
1652	2.40535e-05	3.75e-06	1.39018e-05
1653	5.82687e-05	2.5125e-05	4.16968e-05
1654	6.41857e-05	2.6625e-05	4.54053e-05
1655	6.56006e-05	2.6625e-05	4.61127e-05
1656	6.58578e-05	2.7e-05	4.64289e-05
1657	6.67582e-05	2.7e-05	4.68791e-05
1658	6.56006e-05	2.7e-05	4.63002e-05
1659	7.24179e-05	2.6625e-05	4.95214e-05
1660	8.29654e-05	2.6625e-05	5.47952e-05
1661	8.25795e-05	2.6625e-05	5.46022e-05
1662	0.000138533	2.7375e-05	8.29539e-05
1663	0.000145479	2.7375e-05	8.64269e-05
1664	0.00015011	2.7375e-05	8.87422e-05
1665	0.000152296	2.7375e-05	8.98356e-05
1666	0.000152425	2.7375e-05	8.98999e-05
1667	0.000153583	2.7375e-05	9.04787e-05
1668	0.00015384	2.7375e-05	9.06073e-05
1669	0.00015667	2.7375e-05	9.20222e-05
1670	0.000156284	2.7e-05	9.16418e-05
1671	0.000168375	3.0375e-05	9.93748e-05
1672	0.000168632	3.075e-05	9.9691e-05
1673	0.000167089	2.8875e-05	9.79817e-05
1674	0.00016696	2.8875e-05	9.79174e-05
1675	0.00016696	2.8875e-05	9.79174e-05
1676	0.000166831	2.8875e-05	9.78531e-05
1677	0.000165931	2.8875e-05	9.74029e-05
1678	0.000165802	2.8875e-05	9.73386e-05
1679	0.000165159	2.8875e-05	9.7017e-05
1680	0.000162329	2.85e-05	9.54146e-05
1681	0.000162329	2.8875e-05	9.56021e-05
1682	0.000148952	2.775e-05	8.83509e-05
1683	0.000148695	2.775e-05	8.82223e-05
1684	0.00014445	2.6625e-05	8.55374e-05
1685	0.000136604	2.625e-05	8.14267e-05
1686	6.67582e-05	1.0875e-05	3.88166e-05
1687	6.92022e-05	1.0875e-05	4.00386e-05
1688	6.92022e-05	1.0875e-05	4.00386e-05
1689	6.84304e-05	9.375e-06	3.89027e-05
1690	5.82687e-05	8.625e-06	3.34469e-05
1691	1.98088e-05	4.125e-06	1.19669e-05
1692	4.8493e-05	5.625e-06	2.7059e-05
1693	5.80115e-05	5.625e-06	3.18182e-05
1694	6.07127e-05	6e-06	3.33563e-05
1695	6.6501e-05	6e-06	3.62505e-05
1696	7.66626e-05	6e-06	4.13313e-05
1697	8.30941e-05	6e-06	4.4547e-05
1698	9.13263e-05	4.5e-06	4.79131e-05
1699	9.27412e-05	4.5e-06	4.86206e-05
1700	0.000111006	4.5e-06	5.77532e-05
1701	0.000114608	4.5e-06	5.9554e-05
1702	0.000115508	4.5e-06	6.00042e-05
1703	0.000115508	4.5e-06	6.00042e-05
1704	0.000115508	4.5e-06	6.00042e-05
1705	0.000115508	4.5e-06	6.00042e-05
1706	0.000115508	4.5e-06	6.00042e-05
1707	0.000115508	4.5e-06	6.00042e-05
1708	0.000114865	4.5e-06	5.96826e-05
1709	0.000114865	4.5e-06	5.96826e-05
1710	0.000114737	4.5e-06	5.96183e-05
1711	0.000114737	4.5e-06	5.96183e-05
1712	0.000114608	4.5e-06	5.9554e-05
1713	0.000114479	4.5e-06	5.94897e-05
1714	0.000114479	4.5e-06	5.94897e-05
1715	0.000114479	4.5e-06	5.94897e-05
1716	0.000114479	4.5e-06	5.94897e-05
1717	0.000114479	4.5e-06	5.94897e-05
1718	0.000114222	4.5e-06	5.93611e-05
1719	0.000104832	3.75e-06	5.42911e-05
1720	9.78863e-05	3.75e-06	5.08182e-05
1721	7.71771e-07	3.75e-07	5.73385e-07
1722	0.000106633	4.125e-06	5.5379e-05
1723	0.000107662	4.125e-06	5.58935e-05
1724	0.000108563	4.125e-06	5.63437e-05
1725	0.000109206	4.125e-06	5.66653e-05
1726	0.000109334	4.125e-06	5.67296e-05
1727	0.000109334	4.125e-06	5.67296e-05
1728	0.000109334	4.125e-06	5.67296e-05
1729	0.000109334	4.125e-06	5.67296e-05
1730	0.000109334	4.125e-06	5.67296e-05
1731	0.000109334	4.125e-06	5.67296e-05
1732	0.000109463	4.125e-06	5.67939e-05
1733	0.000109463	4.125e-06	5.67939e-05
1734	0.000109463	4.125e-06	5.67939e-05
1735	0.000109463	4.125e-06	5.67939e-05
1736	0.000109463	4.125e-06	5.67939e-05
1737	0.000109592	4.125e-06	5.68583e-05
1738	0.000109592	4.125e-06	5.68583e-05
1739	0.000109592	4.125e-06	5.68583e-05
1740	0.00010972	4.125e-06	5.69226e-05
1741	0.000106247	4.125e-06	5.51861e-05
1742	9.64714e-05	4.5e-06	5.04857e-05
1743	8.86251e-05	4.5e-06	4.65625e-05
1744	7.91066e-05	4.875e-06	4.19908e-05
1745	5.73683e-05	3.75e-06	3.05592e-05
1746	2.26386e-05	3.375e-06	1.30068e-05
1747	3.2543e-05	9.75e-06	2.11465e-05
1748	3.11281e-05	1.05e-05	2.0814e-05
1749	3.1514e-05	1.05e-05	2.1007e-05
1750	3.03563e-05	1.0125e-05	2.02407e-05
1751	1.73649e-05	9e-06	1.31824e-05
1752	2.23814e-05	1.575e-05	1.90657e-05
1753	2.23814e-05	1.575e-05	1.90657e-05
1754	2.251e-05	1.575e-05	1.913e-05
1755	2.18669e-05	1.4625e-05	1.82459e-05
1756	2.08378e-05	1.4625e-05	1.77314e-05
1757	2.40535e-05	1.5e-05	1.95267e-05
1758	2.40535e-05	1.5e-05	1.95267e-05
1759	2.40535e-05	1.5e-05	1.95267e-05
1760	2.41822e-05	1.5e-05	1.95911e-05
1761	2.30245e-05	1.5e-05	1.90122e-05
1762	2.08378e-05	1.5e-05	1.79189e-05
1763	2.46967e-05	1.5e-05	1.98483e-05
1764	2.46967e-05	1.5e-05	1.98483e-05
1765	2.39249e-05	1.4625e-05	1.92749e-05
1766	5.27377e-05	1.5e-05	3.38688e-05
1767	5.36381e-05	1.5e-05	3.4319e-05
1768	5.44099e-05	1.5e-05	3.47049e-05
1769	5.4024e-05	1.5e-05	3.4512e-05
1770	5.41526e-05	1.5e-05	3.45763e-05
1771	5.38954e-05	1.5e-05	3.44477e-05
1772	5.45385e-05	1.5e-05	3.47692e-05
1773	5.44099e-05	1.5e-05	3.47049e-05
1774	5.11942e-05	1.4625e-05	3.29096e-05
1775	7.1003e-05	1.5375e-05	4.3189e-05
1776	7.13889e-05	1.5375e-05	4.33819e-05
1777	7.2032e-05	1.5375e-05	4.37035e-05
1778	7.22893e-05	1.5375e-05	4.38321e-05
1779	7.21606e-05	1.5375e-05	4.37678e-05
1780	7.24179e-05	1.5375e-05	4.38964e-05
1781	7.24179e-05	1.5e-05	4.37089e-05
1782	7.62767e-05	1.5e-05	4.56383e-05
1783	7.6534e-05	1.5e-05	4.5767e-05
1784	7.83348e-05	1.5e-05	4.66674e-05
1785	7.85921e-05	1.5e-05	4.6796e-05
1786	7.82062e-05	1.5e-05	4.66031e-05
1787	7.7563e-05	1.5e-05	4.62815e-05
1788	7.80775e-05	1.5e-05	4.65387e-05
1789	7.80775e-05	1.5e-05	4.65387e-05
1790	7.80775e-05	1.5e-05	4.65387e-05
1791	7.78203e-05	1.5e-05	4.64101e-05
1792	7.82062e-05	1.5e-05	4.66031e-05
1793	7.82062e-05	1.5e-05	4.66031e-05
1794	7.82062e-05	1.5e-05	4.66031e-05
1795	7.82062e-05	1.5e-05	4.66031e-05
1796	7.80775e-05	1.5e-05	4.65387e-05
1797	7.79489e-05	1.5e-05	4.64744e-05
1798	7.74344e-05	1.5e-05	4.62172e-05
1799	7.74344e-05	1.5e-05	4.62172e-05
1800	7.38328e-05	1.5e-05	4.44164e-05
1801	7.38328e-05	1.5e-05	4.44164e-05
1802	6.97167e-05	1.5e-05	4.23583e-05
1803	6.52147e-05	1.425e-05	3.97323e-05
1804	5.14514e-06	3.75e-07	2.76007e-06
1805	6.68869e-06	1.5e-06	4.09434e-06
1806	6.68869e-06	1.5e-06	4.09434e-06
1807	6.04554e-06	1.5e-06	3.77277e-06
1808	1.26056e-05	6.375e-06	9.49029e-06
1809	1.38919e-05	6.375e-06	1.01334e-05
1810	1.38919e-05	7.875e-06	1.08834e-05
1811	1.42778e-05	7.875e-06	1.10764e-05
1812	1.4535e-05	7.875e-06	1.1205e-05
1813	1.47923e-05	7.875e-06	1.13336e-05
1814	1.47923e-05	7.875e-06	1.13336e-05
1815	1.46637e-05	7.875e-06	1.12693e-05
1816	1.47923e-05	7.875e-06	1.13336e-05
1817	1.42778e-05	7.5e-06	1.08889e-05
1818	1.29915e-05	7.875e-06	1.04332e-05
1819	2.37963e-05	1.2375e-05	1.80856e-05
1820	2.37963e-05	1.2375e-05	1.80856e-05
1821	2.39249e-05	1.2375e-05	1.81499e-05
1822	2.39249e-05	1.2375e-05	1.81499e-05
1823	2.39249e-05	1.2375e-05	1.81499e-05
1824	2.18669e-05	1.2e-05	1.69334e-05
1825	4.01321e-05	3.4125e-05	3.71285e-05
1826	4.02607e-05	3.45e-05	3.73803e-05
1827	4.0518e-05	3.45e-05	3.75089e-05
1828	4.06466e-05	3.45e-05	3.75733e-05
1829	4.0518e-05	3.45e-05	3.75089e-05
1830	3.87172e-05	3.45e-05	3.66085e-05
1831	3.79454e-05	3.45e-05	3.62227e-05
1832	3.80741e-05	3.45e-05	3.6287e-05
1833	3.76882e-05	3.45e-05	3.6094e-05
1834	3.56301e-05	3.45e-05	3.5065e-05
1835	3.69164e-05	3.7875e-05	3.73956e-05
1836	3.69164e-05	3.7875e-05	3.73956e-05
1837	3.67878e-05	3.7875e-05	3.73313e-05
1838	3.02277e-05	3.7875e-05	3.40513e-05
1839	3.17713e-05	3.825e-05	3.50106e-05
1840	3.17713e-05	3.825e-05	3.50106e-05
1841	3.17713e-05	3.825e-05	3.50106e-05
1842	3.18999e-05	3.825e-05	3.50749e-05
1843	3.17713e-05	3.825e-05	3.50106e-05
1844	3.16426e-05	3.7875e-05	3.47587e-05
1845	2.48253e-05	3.3375e-05	2.91001e-05
1846	1.92943e-05	2.7375e-05	2.33346e-05
1847	1.86511e-05	2.6625e-05	2.2638e-05
1848	7.07457e-06	6e-06	6.53727e-06
1849	9.26126e-06	6e-06	7.63062e-06
1850	9.13263e-06	6e-06	7.5663e-06
1851	8.61811e-06	5.625e-06	7.12155e-06
1852	9.26126e-06	5.25e-06	7.25562e-06
1853	9.64714e-06	4.875e-06	7.26106e-06
1854	9.64714e-06	4.5e-06	7.07356e-06
1855	7.97497e-06	2.25e-06	5.11248e-06
1856	1.64645e-05	2.625e-06	9.54472e-06
1857	1.65931e-05	2.625e-06	9.60904e-06
1858	1.65931e-05	3.375e-06	9.98404e-06
1859	1.9037e-05	3.75e-06	1.13935e-05
1860	1.96802e-05	3.75e-06	1.17151e-05
1861	1.94229e-05	4.125e-06	1.17739e-05
1862	1.9037e-05	5.625e-06	1.2331e-05
1863	1.91657e-05	5.625e-06	1.23953e-05
1864	1.86511e-05	5.625e-06	1.21381e-05
1865	1.78794e-05	5.25e-06	1.15647e-05
1866	2.08378e-05	8.25e-06	1.45439e-05
1867	2.08378e-05	8.25e-06	1.45439e-05
1868	2.08378e-05	8.625e-06	1.47314e-05
1869	2.03233e-05	8.625e-06	1.44741e-05
1870	1.98088e-05	8.625e-06	1.42169e-05
1871	2.251e-05	1.2e-05	1.7255e-05
1872	2.26386e-05	1.2e-05	1.73193e-05
1873	2.30245e-05	1.1625e-05	1.73247e-05
1874	2.37963e-05	1.2375e-05	1.80856e-05
1875	2.31531e-05	1.275e-05	1.79515e-05
1876	2.28959e-05	1.275e-05	1.78229e-05
1877	2.23814e-05	1.275e-05	1.75657e-05
1878	2.22527e-05	1.275e-05	1.75013e-05
1879	2.17382e-05	1.275e-05	1.72441e-05
1880	1.99374e-05	1.275e-05	1.63437e-05
1881	2.01947e-05	1.275e-05	1.64723e-05
1882	1.95515e-05	1.275e-05	1.61507e-05
1883	1.47923e-05	1.275e-05	1.37711e-05
1884	1.46637e-05	1.275e-05	1.37068e-05
1885	1.4535e-05	1.275e-05	1.36425e-05
1886	1.04189e-05	9.75e-06	1.00844e-05
1887	9.9044e-06	9.375e-06	9.63968e-06
1888	9.64714e-06	9.375e-06	9.51105e-06
1889	9.26126e-06	9.375e-06	9.31811e-06
1890	7.84634e-06	7.875e-06	7.86066e-06
1891	5.91691e-06	6.75e-06	6.33345e-06
1892	5.91691e-06	6.375e-06	6.14595e-06
1893	3.98749e-06	6e-06	4.99373e-06
1894	1.28629e-06	1.875e-06	1.58064e-06
1895	1.28629e-06	1.5e-06	1.39314e-06
1896	5.14514e-07	3.75e-07	4.44756e-07
1897	1.15766e-06	1.875e-06	1.51633e-06
1898	1.54354e-06	1.875e-06	1.70927e-06
1899	1.67217e-06	2.25e-06	1.96108e-06
1900	5.01651e-06	4.875e-06	4.94575e-06
1901	5.14514e-06	4.875e-06	5.01006e-06
1902	5.14514e-06	4.875e-06	5.01006e-06
1903	5.14514e-06	4.875e-06	5.01006e-06
1904	5.27377e-06	4.5e-06	4.88688e-06
1905	5.4024e-06	4.5e-06	4.95119e-06
1906	2.10951e-05	4.875e-06	1.2985e-05
1907	2.13523e-05	4.875e-06	1.31137e-05
1908	2.17382e-05	4.875e-06	1.33066e-05
1909	2.22527e-05	4.875e-06	1.35639e-05
1910	2.22527e-05	4.875e-06	1.35639e-05
1911	2.22527e-05	4.875e-06	1.35639e-05
1912	2.22527e-05	4.875e-06	1.35639e-05
1913	2.21241e-05	4.875e-06	1.34995e-05
1914	2.251e-05	4.875e-06	1.36925e-05
1915	2.251e-05	4.875e-06	1.36925e-05
1916	2.22527e-05	4.875e-06	1.35639e-05
1917	2.16096e-05	4.875e-06	1.32423e-05
1918	2.37963e-05	6e-06	1.48981e-05
1919	2.39249e-05	6e-06	1.49624e-05
1920	2.39249e-05	5.625e-06	1.47749e-05
1921	2.39249e-05	5.625e-06	1.47749e-05
1922	2.40535e-05	5.625e-06	1.48393e-05
1923	2.37963e-05	5.25e-06	1.45231e-05
1924	2.37963e-05	5.25e-06	1.45231e-05
1925	2.30245e-05	5.25e-06	1.41372e-05
1926	1.87798e-05	4.5e-06	1.16399e-05
1927	1.51782e-05	4.125e-06	9.65158e-06
1928	1.31201e-05	3.375e-06	8.24755e-06
1929	5.14514e-06	3e-06	4.07257e-06
1930	5.53103e-06	3e-06	4.26551e-06
1931	5.65966e-06	3e-06	4.32982e-06
1932	5.01651e-06	3e-06	4.00825e-06
1933	5.91691e-06	5.625e-06	5.77095e-06
1934	5.91691e-06	5.625e-06	5.77095e-06
1935	5.4024e-06	5.625e-06	5.51369e-06
1936	6.43143e-06	1.2e-05	9.21569e-06
1937	6.43143e-06	1.2e-05	9.21569e-06
1938	5.27377e-06	1.125e-05	8.26187e-06
1939	6.81731e-06	1.8375e-05	1.25961e-05
1940	7.07457e-06	1.8375e-05	1.27248e-05
1941	7.07457e-06	1.8375e-05	1.27248e-05
1942	7.07457e-06	1.8375e-05	1.27248e-05
1943	7.07457e-06	1.8375e-05	1.27248e-05
1944	6.68869e-06	1.8e-05	1.23443e-05
1945	7.2032e-06	2.85e-05	1.78515e-05
1946	7.07457e-06	2.85e-05	1.77872e-05
1947	7.07457e-06	2.85e-05	1.77872e-05
1948	6.56006e-06	2.85e-05	1.753e-05
1949	7.07457e-06	2.9625e-05	1.83497e-05
1950	7.07457e-06	2.9625e-05	1.83497e-05
1951	6.3028e-06	2.9625e-05	1.79638e-05
1952	7.97497e-06	4.0875e-05	2.44249e-05
1953	7.46046e-06	3.9e-05	2.32302e-05
1954	1.29915e-05	6.3e-05	3.79956e-05
1955	1.33774e-05	6.45e-05	3.89386e-05
1956	1.37633e-05	6.4875e-05	3.9319e-05
1957	2.75265e-05	0.000105	6.62631e-05
1958	2.98418e-05	0.00010725	6.85457e-05
1959	3.07422e-05	0.00010725	6.89959e-05
1960	8.83678e-05	0.00014625	0.000117309
1961	8.97827e-05	0.00014737	0.000118579
1962	9.29985e-05	0.00014812	0.000120561
1963	9.29985e-05	0.0001485	0.000120749
1964	9.37702e-05	0.00014812	0.000120947
1965	9.50565e-05	0.00014812	0.00012159
1966	9.54424e-05	0.00014812	0.000121783
1967	9.63428e-05	0.00014812	0.000122234
1968	9.62142e-05	0.000144	0.000120107
1969	0.000125541	0.000144	0.00013477
1970	0.000141749	0.000144	0.000142874
1971	0.000144193	0.000144	0.000144096
1972	0.000144964	0.000144	0.000144482
1973	0.00014535	0.00014362	0.000144487
1974	0.000146122	0.00014362	0.000144873
1975	0.000146637	0.00014362	0.000145131
1976	0.00014445	0.00014175	0.0001431
1977	0.000142778	0.00013762	0.000140201
1978	0.000149852	0.00013762	0.000143738
1979	0.000149981	0.00013762	0.000143803
1980	0.000149852	0.00013762	0.000143738
1981	0.000143035	0.000132	0.000137517
1982	0.000142906	0.000132	0.000137453
1983	0.000142392	0.0001305	0.000136446
1984	0.000142135	0.00013012	0.00013613
1985	0.000131458	0.00012225	0.000126854
1986	0.000131973	0.00012262	0.000127299
1987	0.000130944	0.00012225	0.000126597
1988	0.000130687	0.00012225	0.000126468
1989	0.000127214	0.00012	0.000123607
1990	0.000123483	0.000117	0.000120242
1991	5.86546e-05	6.825e-05	6.34522e-05
1992	2.79124e-05	2.4e-05	2.59562e-05
1993	4.86216e-05	3.3e-05	4.08107e-05
1994	5.0551e-05	3.3375e-05	4.1963e-05
1995	5.08083e-05	3.3375e-05	4.20916e-05
1996	5.10655e-05	3.15e-05	4.12827e-05
1997	4.97793e-05	2.625e-05	3.80146e-05
1998	3.96176e-05	2.1e-05	3.03088e-05
1999	5.11942e-05	2.2875e-05	3.70345e-05
[truncated: 7,131 more rows]

## Sheet: CANC_dZF
bp	CLIP36_density	CLIP49_density	average
1	1.44669e-05	7.85372e-06	1.11603e-05
2	3.83373e-05	1.2566e-05	2.54516e-05
3	4.77408e-05	1.2566e-05	3.01534e-05
4	9.98216e-05	1.72782e-05	5.85499e-05
5	0.000105608	2.35612e-05	6.45848e-05
6	0.000116459	2.67026e-05	7.15806e-05
7	0.000123692	2.67026e-05	7.51973e-05
8	0.000130202	2.98441e-05	8.00231e-05
9	0.000149009	3.92686e-05	9.41388e-05
10	0.000169263	5.02638e-05	0.000109763
11	0.00017505	5.4976e-05	0.000115013
12	0.00017505	5.4976e-05	0.000115013
13	0.000175773	5.4976e-05	0.000115374
14	0.000198197	0.000138225	0.000168211
15	0.00019892	0.000138225	0.000168573
16	0.00019892	0.000138225	0.000168573
17	0.00019892	0.000139796	0.000169358
18	0.000200367	0.000139796	0.000170081
19	0.000235087	0.00016807	0.000201578
20	0.000235087	0.00016807	0.000201578
21	0.000236534	0.00016807	0.000202302
22	0.0002293	0.00016964	0.00019947
23	0.000256064	0.000175923	0.000215994
24	0.000286445	0.000186919	0.000236682
25	0.000283551	0.000186919	0.000235235
26	0.000283551	0.000186919	0.000235235
27	0.000281381	0.000188489	0.000234935
28	0.000280658	0.000188489	0.000234574
29	0.000274871	0.000186919	0.000230895
30	0.000146839	0.000144508	0.000145674
31	0.000574336	0.00040054	0.000487438
32	0.000600376	0.000435096	0.000517736
33	0.0006011	0.000441379	0.000521239
34	0.000611227	0.000466511	0.000538869
35	0.000617737	0.000468082	0.000542909
36	0.000617013	0.000453945	0.000535479
37	0.000653181	0.000455516	0.000554348
38	0.000744322	0.000469652	0.000606987
39	0.00079134	0.000474365	0.000632852
40	0.00082823	0.000475935	0.000652083
41	0.00083908	0.000472794	0.000655937
42	0.000840527	0.000472794	0.00065666
43	0.00084125	0.000472794	0.000657022
44	0.000835464	0.000463369	0.000649417
45	0.00081521	0.000403681	0.000609446
46	0.000927328	0.000431955	0.000679641
47	0.000960602	0.000431955	0.000696278
48	0.000954092	0.000427242	0.000690667
49	0.000955539	0.000416247	0.000685893
50	0.00104017	0.000430384	0.000735277
51	0.00103583	0.000427242	0.000731536
52	0.00103728	0.000427242	0.00073226
53	0.00103511	0.000424101	0.000729604
54	0.0010286	0.000424101	0.000726349
55	0.00102643	0.000424101	0.000725264
56	0.000956262	0.000416247	0.000686255
57	0.000880311	0.000395827	0.000638069
58	0.000748662	0.000279592	0.000514127
59	0.000742875	0.000276451	0.000509663
60	0.000559869	0.000235612	0.00039774
61	0.000477408	0.000182206	0.000329807
62	0.000465834	0.000174353	0.000320093
63	0.000426774	0.000157074	0.000291924
64	0.0004152	0.000155504	0.000285352
65	0.000339972	0.000131942	0.000235957
66	0.000343589	0.000122518	0.000233053
67	0.000343589	0.000122518	0.000233053
68	0.000342142	0.000120947	0.000231545
69	0.000314655	8.32494e-05	0.000198952
70	0.000309592	6.7542e-05	0.000188567
71	0.000300188	6.28298e-05	0.000181509
72	0.000215557	4.39808e-05	0.000129769
73	0.000206877	4.08393e-05	0.000123858
74	0.000211217	4.55516e-05	0.000128384
75	4.84641e-05	1.09952e-05	2.97297e-05
76	0.000219897	0.000158645	0.000189271
77	0.000219897	0.000158645	0.000189271
78	0.000219174	0.000158645	0.000188909
79	0.00021845	0.000157074	0.000187762
80	0.000211217	0.000158645	0.000184931
81	0.000213387	0.000158645	0.000186016
82	0.000213387	0.000161787	0.000187587
83	0.00021411	0.000183777	0.000198944
84	0.00021411	0.000186919	0.000200514
85	0.000308145	0.000290588	0.000299366
86	0.000341419	0.000300012	0.000320715
87	0.000354439	0.000306295	0.000330367
88	0.000373246	0.000320432	0.000346839
89	0.000373246	0.000320432	0.000346839
90	0.000374693	0.000320432	0.000347562
91	0.000371799	0.000320432	0.000346116
92	0.000377586	0.000323573	0.00035058
93	0.000375416	0.000323573	0.000349495
94	0.000371799	0.000318861	0.00034533
95	0.000311038	0.000300012	0.000305525
96	0.000401457	0.000334568	0.000368012
97	0.000469451	0.000336139	0.000402795
98	0.000473791	0.00033771	0.00040575
99	0.000471621	0.000334568	0.000403095
100	0.000461494	0.000306295	0.000383895
101	0.00119135	0.000502638	0.000846994
102	0.00121739	0.000512063	0.000864726
103	0.0012579	0.000521487	0.000889692
104	0.00157545	0.000585887	0.00108067
105	0.0015957	0.000589029	0.00109236
106	0.00167382	0.000639293	0.00115656
107	0.00166297	0.000617302	0.00114014
108	0.00167599	0.000653429	0.00116471
109	0.00167454	0.000636151	0.00115535
110	0.00169263	0.000676991	0.00118481
111	0.00175339	0.000728825	0.00124111
112	0.0017599	0.000752386	0.00125614
113	0.00170999	0.000747674	0.00122883
114	0.00170275	0.000757099	0.00122993
115	0.00168756	0.000755528	0.00122155
116	0.00169986	0.000768094	0.00123398
117	0.00166731	0.000753957	0.00121063
118	0.00164127	0.000735108	0.00118819
119	0.00164416	0.00073982	0.00119199
120	0.00149588	0.00069584	0.00109586
121	0.0014966	0.000720971	0.00110879
122	0.00141559	0.000683274	0.00104943
123	0.00141342	0.000687986	0.0010507
124	0.00141197	0.000687986	0.00104998
125	0.00136857	0.000678561	0.00102356
126	0.00127381	0.000659712	0.000966762
127	0.00121088	0.000645576	0.000928228
128	0.00110093	0.000600024	0.000850478
129	0.00110165	0.000598453	0.000850054
130	0.00107778	0.000582746	0.000830265
131	0.000489705	0.000196343	0.000343024
132	0.000557699	0.000234041	0.00039587
133	0.000559869	0.000235612	0.00039774
134	0.00040869	0.000221475	0.000315082
135	0.000282828	0.000175923	0.000229376
136	0.000360226	0.000196343	0.000278284
137	0.000330569	0.000185348	0.000257958
138	0.000330569	0.000185348	0.000257958
139	0.000331292	0.000185348	0.00025832
140	0.000331292	0.000185348	0.00025832
141	0.000326952	0.000183777	0.000255365
142	0.000320442	0.000183777	0.000252109
143	0.000310315	0.000182206	0.000246261
144	0.000305252	0.000179065	0.000242158
145	0.000293678	0.000166499	0.000230088
146	0.000251724	0.000120947	0.000186336
147	0.000253894	0.000133513	0.000193704
148	0.000252447	0.000133513	0.00019298
149	0.000250277	0.000131942	0.00019111
150	0.00022713	0.000124089	0.00017561
151	0.00018373	0.000109952	0.000146841
152	0.000157689	9.42446e-05	0.000125967
153	0.000166369	8.95324e-05	0.000127951
154	0.000183006	8.48202e-05	0.000133913
155	0.000169986	6.91127e-05	0.000119549
156	0.000118629	2.51319e-05	7.18802e-05
157	0.000159859	0.000161787	0.000160823
158	0.000162753	0.000164928	0.00016384
159	0.000150456	0.000164928	0.000157692
160	0.000148286	0.000172782	0.000160534
161	0.000177943	0.000213621	0.000195782
162	0.00017722	0.000213621	0.00019542
163	0.000177943	0.000223046	0.000200494
164	0.000184453	0.00023247	0.000208462
165	0.00018807	0.000234041	0.000211055
166	0.000196027	0.000245036	0.000220531
167	0.000199643	0.000248178	0.00022391
168	0.000199643	0.000249748	0.000224696
169	0.00019892	0.000249748	0.000224334
170	0.000199643	0.000249748	0.000224696
171	0.000199643	0.000249748	0.000224696
172	0.000189516	0.000248178	0.000218847
173	0.00019241	0.000251319	0.000221864
174	0.000188793	0.000251319	0.000220056
175	0.000184453	0.000251319	0.000217886
176	0.000154073	0.00021048	0.000182276
177	0.000156243	0.000213621	0.000184932
178	0.000156243	0.00021205	0.000184146
179	9.11415e-05	0.00016964	0.000130391
180	9.83749e-05	0.000188489	0.000143432
181	0.000101268	0.00019006	0.000145664
182	9.47582e-05	0.000188489	0.000141624
183	9.47582e-05	0.000188489	0.000141624
184	9.25882e-05	0.000186919	0.000139753
185	8.89714e-05	0.000183777	0.000136374
186	8.89714e-05	0.000185348	0.00013716
187	8.1738e-05	0.000166499	0.000124118
188	7.45045e-05	0.000141367	0.000107936
189	5.56976e-05	0.000113094	8.43956e-05
190	5.42509e-05	0.000116235	8.5243e-05
191	5.42509e-05	0.000116235	8.5243e-05
192	5.35275e-05	0.000113094	8.33106e-05
193	2.82105e-05	4.71223e-05	3.76664e-05
194	0.000129479	0.000174353	0.000151916
195	0.000130925	0.000174353	0.000152639
196	0.000130925	0.000174353	0.000152639
197	0.000130925	0.000174353	0.000152639
198	0.000130925	0.000174353	0.000152639
199	0.000130202	0.000174353	0.000152277
200	0.000128755	0.000174353	0.000151554
201	0.000125862	0.00016807	0.000146966
202	0.000154073	0.000193202	0.000173637
203	0.000160583	0.000197914	0.000179248
204	0.000159136	0.000194772	0.000176954
205	0.000159136	0.000194772	0.000176954
206	0.000160583	0.000188489	0.000174536
207	0.000152626	0.000175923	0.000164275
208	0.000308868	0.000227758	0.000268313
209	0.000331292	0.00023247	0.000281881
210	0.000334185	0.00023247	0.000283328
211	0.000341419	0.00023247	0.000286944
212	0.00038265	0.000237182	0.000309916
213	0.000332739	0.000180636	0.000256687
214	0.00040001	0.000265456	0.000332733
215	0.00040218	0.000270168	0.000336174
216	0.000402903	0.000270168	0.000336536
217	0.00040218	0.000270168	0.000336174
218	0.000385543	0.000262314	0.000323929
219	0.00038048	0.000254461	0.00031747
220	0.000527319	0.000278022	0.00040267
221	0.000532382	0.000281163	0.000406773
222	0.000537445	0.000281163	0.000409304
223	0.000537445	0.000282734	0.00041009
224	0.000524425	0.000270168	0.000397297
225	0.000524425	0.000270168	0.000397297
226	0.000525872	0.000268597	0.000397235
227	0.000525149	0.000267026	0.000396088
228	0.000477408	0.000249748	0.000363578
229	0.000481024	0.000251319	0.000366172
230	0.000483195	0.000251319	0.000367257
231	0.000483918	0.000257602	0.00037076
232	0.000469451	0.00025289	0.00036117
233	0.000441964	0.000248178	0.000345071
234	0.000460047	0.000260743	0.000360395
235	0.000456431	0.000257602	0.000357016
236	0.000405073	0.000240324	0.000322699
237	0.000413753	0.000249748	0.000331751
238	0.000389883	0.000205767	0.000297825
239	0.000473068	0.000245036	0.000359052
240	0.000473791	0.000245036	0.000359414
241	0.000471621	0.000243465	0.000357543
242	0.000470898	0.000245036	0.000357967
243	0.000457154	0.000240324	0.000348739
244	0.000445581	0.00023247	0.000339025
245	0.000431837	0.000226187	0.000329012
246	0.000431837	0.000230899	0.000331368
247	0.000431837	0.000230899	0.000331368
248	0.00042822	0.000226187	0.000327204
249	0.00042388	0.000226187	0.000325034
250	0.00042171	0.000224616	0.000323163
251	0.000420987	0.000224616	0.000322802
252	0.000401457	0.000213621	0.000307539
253	0.000379033	0.000202626	0.000290829
254	0.000378309	0.000202626	0.000290468
255	0.000343589	0.000186919	0.000265254
256	0.000343589	0.000183777	0.000263683
257	0.000330569	0.000171211	0.00025089
258	0.000141052	9.89569e-05	0.000120005
259	0.000131649	9.73861e-05	0.000114517
260	8.24613e-05	8.16787e-05	8.207e-05
261	0.000101992	8.79617e-05	9.49767e-05
262	6.2931e-05	5.4976e-05	5.89535e-05
263	0.000110672	7.22542e-05	9.1463e-05
264	0.000106332	6.1259e-05	8.37954e-05
265	0.000115012	6.44005e-05	8.97062e-05
266	0.000116459	6.1259e-05	8.88588e-05
267	0.000107055	4.71223e-05	7.70887e-05
268	0.000352269	7.3825e-05	0.000213047
269	0.000360949	7.53957e-05	0.000218172
270	0.000358779	7.3825e-05	0.000216302
271	0.000361673	7.3825e-05	0.000217749
272	0.000361673	7.3825e-05	0.000217749
273	0.000360949	7.3825e-05	0.000217387
274	0.000359503	7.06835e-05	0.000215093
275	0.00038699	7.53957e-05	0.000231193
276	0.00038916	7.53957e-05	0.000232278
277	0.00038916	7.3825e-05	0.000231492
278	0.000388436	7.3825e-05	0.000231131
279	0.000388436	7.3825e-05	0.000231131
280	0.000388436	7.3825e-05	0.000231131
281	0.000387713	7.22542e-05	0.000229984
282	0.000387713	7.22542e-05	0.000229984
283	0.000386266	7.3825e-05	0.000230046
284	0.000381926	7.3825e-05	0.000227876
285	0.000383373	7.85372e-05	0.000230955
286	0.000383373	7.85372e-05	0.000230955
287	0.000379756	7.69665e-05	0.000228361
288	0.000357332	7.3825e-05	0.000215579
289	0.000350822	7.3825e-05	0.000212324
290	0.000332015	7.22542e-05	0.000202135
291	0.000253171	6.7542e-05	0.000160356
292	0.000258958	6.91127e-05	0.000164035
293	0.000253894	6.91127e-05	0.000161503
294	0.000237981	6.59712e-05	0.000151976
295	9.40349e-05	3.29856e-05	6.35102e-05
296	0.000108502	4.86931e-05	7.85974e-05
297	9.62049e-05	4.86931e-05	7.2449e-05
298	9.62049e-05	4.86931e-05	7.2449e-05
299	8.89714e-05	4.71223e-05	6.80469e-05
300	8.1738e-05	4.55516e-05	6.36448e-05
301	0.000188793	0.000108381	0.000148587
302	0.00021411	0.000113094	0.000163602
303	0.000219897	0.000117806	0.000168851
304	0.00022062	0.000116235	0.000168428
305	0.000222067	0.000116235	0.000169151
306	0.000215557	0.000113094	0.000164325
307	0.000230747	0.000114664	0.000172706
308	0.000245937	0.000116235	0.000181086
309	0.000252447	0.000117806	0.000185127
310	0.000330569	0.00014765	0.000239109
311	0.000336355	0.000150791	0.000243573
312	0.000337079	0.000150791	0.000243935
313	0.000333462	0.000149221	0.000241341
314	0.000423157	0.000186919	0.000305038
315	0.000424604	0.000185348	0.000304976
316	0.000424604	0.000186919	0.000305761
317	0.000448474	0.00019006	0.000319267
318	0.000449197	0.00019006	0.000319629
319	0.000449921	0.000191631	0.000320776
320	0.000451367	0.000191631	0.000321499
321	0.000452814	0.000191631	0.000322222
322	0.000452814	0.000191631	0.000322222
323	0.0004369	0.000179065	0.000307983
324	0.000577953	0.00019006	0.000384006
325	0.00058591	0.00019006	0.000387985
326	0.000600376	0.00019006	0.000395218
327	0.00060544	0.00019006	0.00039775
328	0.000608333	0.00019006	0.000399197
329	0.00060978	0.000186919	0.000398349
330	0.000611227	0.000188489	0.000399858
331	0.000602546	0.000183777	0.000393162
332	0.000606163	0.000183777	0.00039497
333	0.000562039	0.00016964	0.00036584
334	0.000562039	0.00016964	0.00036584
335	0.000562039	0.00016964	0.00036584
336	0.000562039	0.00016807	0.000365054
337	0.000543956	0.000155504	0.00034973
338	0.000546849	0.000155504	0.000351176
339	0.000545402	0.000155504	0.000350453
340	0.000543232	0.000155504	0.000349368
341	0.000533829	0.000152362	0.000343095
342	0.000531659	0.000152362	0.00034201
343	0.000484641	0.000138225	0.000311433
344	0.000473791	0.000141367	0.000307579
345	0.000473791	0.000141367	0.000307579
346	0.000438347	0.000130372	0.000284359
347	0.000437624	0.000130372	0.000283998
348	0.00042605	0.00012566	0.000275855
349	0.000268361	0.000106811	0.000187586
350	0.000265468	0.000106811	0.000186139
351	0.000206877	8.32494e-05	0.000145063
352	0.000161306	6.7542e-05	0.000114424
353	0.000159136	6.91127e-05	0.000114124
354	0.000156243	6.7542e-05	0.000111892
355	2.38704e-05	1.09952e-05	1.74328e-05
356	2.89338e-05	1.57074e-05	2.23206e-05
357	2.89338e-05	1.41367e-05	2.15352e-05
358	2.17004e-05	1.41367e-05	1.79185e-05
359	2.60404e-05	1.88489e-05	2.24447e-05
360	2.60404e-05	2.04197e-05	2.323e-05
361	2.60404e-05	2.04197e-05	2.323e-05
362	2.53171e-05	2.19904e-05	2.36537e-05
363	2.60404e-05	2.19904e-05	2.40154e-05
364	2.60404e-05	2.19904e-05	2.40154e-05
365	2.60404e-05	2.19904e-05	2.40154e-05
366	2.60404e-05	2.19904e-05	2.40154e-05
367	2.53171e-05	2.04197e-05	2.28684e-05
368	2.53171e-05	2.04197e-05	2.28684e-05
369	2.53171e-05	2.04197e-05	2.28684e-05
370	2.45937e-05	2.04197e-05	2.25067e-05
371	2.45937e-05	2.04197e-05	2.25067e-05
372	2.3147e-05	2.04197e-05	2.17834e-05
373	1.51902e-05	1.72782e-05	1.62342e-05
374	1.66369e-05	2.51319e-05	2.08844e-05
375	1.66369e-05	2.51319e-05	2.08844e-05
376	1.66369e-05	2.51319e-05	2.08844e-05
377	1.15735e-05	2.51319e-05	1.83527e-05
378	3.90606e-05	4.71223e-05	4.30915e-05
379	4.34007e-05	4.71223e-05	4.52615e-05
380	4.55707e-05	4.71223e-05	4.63465e-05
381	4.70174e-05	4.71223e-05	4.70699e-05
382	5.78676e-05	4.86931e-05	5.32803e-05
383	5.8591e-05	4.86931e-05	5.3642e-05
384	6.00376e-05	4.86931e-05	5.43654e-05
385	6.0761e-05	5.02638e-05	5.55124e-05
386	6.0761e-05	5.02638e-05	5.55124e-05
387	6.0761e-05	5.02638e-05	5.55124e-05
388	6.00376e-05	5.02638e-05	5.51507e-05
389	6.00376e-05	4.86931e-05	5.43654e-05
390	6.14843e-05	4.71223e-05	5.43033e-05
391	5.93143e-05	4.71223e-05	5.32183e-05
392	5.8591e-05	4.71223e-05	5.28566e-05
393	5.93143e-05	4.55516e-05	5.24329e-05
394	7.30579e-05	4.55516e-05	5.93047e-05
395	8.75248e-05	4.71223e-05	6.73235e-05
396	9.33115e-05	4.71223e-05	7.02169e-05
397	9.18648e-05	4.08393e-05	6.63521e-05
398	9.47582e-05	5.02638e-05	7.2511e-05
399	9.47582e-05	5.02638e-05	7.2511e-05
400	9.47582e-05	5.02638e-05	7.2511e-05
401	9.47582e-05	5.02638e-05	7.2511e-05
402	9.33115e-05	5.02638e-05	7.17877e-05
403	8.82481e-05	4.55516e-05	6.68998e-05
404	8.82481e-05	4.71223e-05	6.76852e-05
405	8.82481e-05	4.71223e-05	6.76852e-05
406	8.82481e-05	4.71223e-05	6.76852e-05
407	8.68014e-05	4.71223e-05	6.69619e-05
408	8.68014e-05	4.71223e-05	6.69619e-05
409	8.68014e-05	4.71223e-05	6.69619e-05
410	8.68014e-05	4.71223e-05	6.69619e-05
411	8.53547e-05	4.55516e-05	6.54531e-05
412	8.53547e-05	4.55516e-05	6.54531e-05
413	8.3908e-05	4.55516e-05	6.47298e-05
414	8.24613e-05	4.39808e-05	6.32211e-05
415	7.73979e-05	4.39808e-05	6.06894e-05
416	7.59512e-05	4.39808e-05	5.9966e-05
417	2.17004e-06	7.85372e-06	5.01188e-06
418	2.89338e-06	7.85372e-06	5.37355e-06
419	2.89338e-06	7.85372e-06	5.37355e-06
420	2.17004e-06	7.85372e-06	5.01188e-06
421	2.89338e-06	7.85372e-06	5.37355e-06
422	2.89338e-06	6.28298e-06	4.58818e-06
423	3.61673e-06	7.85372e-06	5.73522e-06
424	3.61673e-06	7.85372e-06	5.73522e-06
425	3.61673e-06	7.85372e-06	5.73522e-06
426	3.61673e-06	7.85372e-06	5.73522e-06
427	3.61673e-06	1.57074e-06	2.59373e-06
428	4.34007e-06	3.14149e-06	3.74078e-06
429	4.34007e-06	3.14149e-06	3.74078e-06
430	4.34007e-06	3.14149e-06	3.74078e-06
431	4.34007e-06	3.14149e-06	3.74078e-06
432	4.34007e-06	3.14149e-06	3.74078e-06
433	8.68014e-06	4.71223e-06	6.69619e-06
434	8.68014e-06	4.71223e-06	6.69619e-06
435	1.37436e-05	1.2566e-05	1.31548e-05
436	1.37436e-05	1.2566e-05	1.31548e-05
437	2.24237e-05	3.14149e-05	2.69193e-05
438	2.60404e-05	3.29856e-05	2.9513e-05
439	2.60404e-05	3.29856e-05	2.9513e-05
440	5.06342e-05	6.1259e-05	5.59466e-05
441	5.13575e-05	6.1259e-05	5.63083e-05
442	5.49742e-05	6.44005e-05	5.96874e-05
443	5.49742e-05	6.44005e-05	5.96874e-05
444	5.49742e-05	6.44005e-05	5.96874e-05
445	5.49742e-05	6.44005e-05	5.96874e-05
446	5.64209e-05	6.44005e-05	6.04107e-05
447	5.64209e-05	6.44005e-05	6.04107e-05
448	5.64209e-05	6.44005e-05	6.04107e-05
449	5.64209e-05	6.44005e-05	6.04107e-05
450	7.37812e-05	9.11031e-05	8.24422e-05
451	7.37812e-05	9.26739e-05	8.32275e-05
452	7.37812e-05	9.26739e-05	8.32275e-05
453	7.37812e-05	9.26739e-05	8.32275e-05
454	7.37812e-05	9.26739e-05	8.32275e-05
455	7.37812e-05	9.26739e-05	8.32275e-05
456	7.30579e-05	8.79617e-05	8.05098e-05
457	6.2931e-05	7.53957e-05	6.91634e-05
458	7.08878e-05	8.16787e-05	7.62833e-05
459	7.08878e-05	8.16787e-05	7.62833e-05
460	7.01645e-05	8.16787e-05	7.59216e-05
461	7.01645e-05	7.85372e-05	7.43508e-05
462	5.49742e-05	6.44005e-05	5.96874e-05
463	6.22077e-05	7.53957e-05	6.88017e-05
464	6.22077e-05	7.53957e-05	6.88017e-05
465	6.14843e-05	7.3825e-05	6.76546e-05
466	6.00376e-05	7.3825e-05	6.69313e-05
467	5.78676e-05	7.22542e-05	6.50609e-05
468	5.8591e-05	7.22542e-05	6.54226e-05
469	4.41241e-05	5.65468e-05	5.03354e-05
470	5.78676e-05	5.81175e-05	5.79926e-05
471	5.78676e-05	5.81175e-05	5.79926e-05
472	5.35275e-05	5.65468e-05	5.50372e-05
473	3.76139e-05	3.45564e-05	3.60852e-05
474	8.60781e-05	4.86931e-05	6.73856e-05
475	8.75248e-05	4.86931e-05	6.81089e-05
476	8.68014e-05	4.86931e-05	6.77472e-05
477	8.60781e-05	4.86931e-05	6.73856e-05
478	8.68014e-05	4.86931e-05	6.77472e-05
479	8.68014e-05	4.86931e-05	6.77472e-05
480	8.68014e-05	4.86931e-05	6.77472e-05
481	8.68014e-05	4.86931e-05	6.77472e-05
482	8.68014e-05	4.86931e-05	6.77472e-05
483	8.60781e-05	4.71223e-05	6.66002e-05
484	8.3908e-05	4.71223e-05	6.55152e-05
485	8.10147e-05	4.55516e-05	6.32831e-05
486	7.81213e-05	4.55516e-05	6.18364e-05
487	7.16112e-05	3.45564e-05	5.30838e-05
488	9.69282e-05	5.18346e-05	7.43814e-05
489	9.76516e-05	5.18346e-05	7.47431e-05
490	0.000102715	5.18346e-05	7.72748e-05
491	0.000102715	5.18346e-05	7.72748e-05
492	0.000102715	5.02638e-05	7.64894e-05
493	5.06342e-05	3.61271e-05	4.33806e-05
494	5.28042e-05	3.76979e-05	4.5251e-05
495	5.42509e-05	3.61271e-05	4.5189e-05
496	5.35275e-05	3.45564e-05	4.4042e-05
497	6.00376e-05	4.39808e-05	5.20092e-05
498	6.0761e-05	4.39808e-05	5.23709e-05
499	6.00376e-05	4.39808e-05	5.20092e-05
500	6.00376e-05	4.39808e-05	5.20092e-05
501	6.00376e-05	4.39808e-05	5.20092e-05
502	6.00376e-05	4.39808e-05	5.20092e-05
503	5.8591e-05	4.24101e-05	5.05005e-05
504	5.8591e-05	4.24101e-05	5.05005e-05
505	5.8591e-05	4.24101e-05	5.05005e-05
506	4.99108e-05	3.29856e-05	4.14482e-05
507	5.06342e-05	3.29856e-05	4.18099e-05
508	5.06342e-05	3.29856e-05	4.18099e-05
509	4.99108e-05	3.29856e-05	4.14482e-05
510	2.17004e-05	1.2566e-05	1.71332e-05
511	2.17004e-05	1.2566e-05	1.71332e-05
512	2.17004e-05	1.2566e-05	1.71332e-05
513	2.17004e-05	1.2566e-05	1.71332e-05
514	1.66369e-05	1.2566e-05	1.46014e-05
515	1.8807e-05	1.72782e-05	1.80426e-05
516	1.8807e-05	1.72782e-05	1.80426e-05
517	1.73603e-05	1.57074e-05	1.65339e-05
518	1.73603e-05	1.41367e-05	1.57485e-05
519	1.73603e-05	1.41367e-05	1.57485e-05
520	1.73603e-05	1.41367e-05	1.57485e-05
521	1.73603e-05	1.2566e-05	1.49631e-05
522	1.22969e-05	7.85372e-06	1.00753e-05
523	1.37436e-05	7.85372e-06	1.07986e-05
524	1.37436e-05	7.85372e-06	1.07986e-05
525	1.37436e-05	7.85372e-06	1.07986e-05
526	1.08502e-05	6.28298e-06	8.56658e-06
527	1.15735e-05	6.28298e-06	8.92825e-06
528	7.9568e-06	6.28298e-06	7.11989e-06
529	1.15735e-05	1.2566e-05	1.20697e-05
530	1.15735e-05	1.2566e-05	1.20697e-05
531	1.08502e-05	1.2566e-05	1.17081e-05
532	1.30202e-05	1.41367e-05	1.35785e-05
533	1.51902e-05	2.04197e-05	1.7805e-05
534	1.44669e-05	1.88489e-05	1.66579e-05
535	1.37436e-05	1.88489e-05	1.62962e-05
536	1.37436e-05	1.88489e-05	1.62962e-05
537	1.44669e-05	2.04197e-05	1.74433e-05
538	1.59136e-05	2.04197e-05	1.81666e-05
539	1.59136e-05	1.88489e-05	1.73813e-05
540	1.51902e-05	1.88489e-05	1.70196e-05
541	2.02537e-05	3.14149e-05	2.58343e-05
542	2.02537e-05	3.14149e-05	2.58343e-05
543	2.02537e-05	3.14149e-05	2.58343e-05
544	2.02537e-05	3.14149e-05	2.58343e-05
545	2.82105e-05	5.02638e-05	3.92371e-05
546	2.82105e-05	5.02638e-05	3.92371e-05
547	2.82105e-05	5.02638e-05	3.92371e-05
548	2.82105e-05	5.02638e-05	3.92371e-05
549	2.82105e-05	5.02638e-05	3.92371e-05
550	2.67638e-05	5.02638e-05	3.85138e-05
551	2.67638e-05	5.34053e-05	4.00845e-05
552	2.67638e-05	5.34053e-05	4.00845e-05
553	2.60404e-05	5.18346e-05	3.89375e-05
554	2.60404e-05	5.18346e-05	3.89375e-05
555	2.60404e-05	5.18346e-05	3.89375e-05
556	2.53171e-05	5.18346e-05	3.85758e-05
557	2.53171e-05	5.18346e-05	3.85758e-05
558	2.45937e-05	5.02638e-05	3.74288e-05
559	2.38704e-05	5.02638e-05	3.70671e-05
560	1.95303e-05	3.92686e-05	2.93995e-05
561	1.95303e-05	3.92686e-05	2.93995e-05
562	1.95303e-05	3.92686e-05	2.93995e-05
563	1.95303e-05	3.92686e-05	2.93995e-05
564	1.73603e-05	3.29856e-05	2.5173e-05
565	4.34007e-06	1.88489e-05	1.15945e-05
566	3.61673e-06	1.88489e-05	1.12328e-05
567	2.89338e-06	1.88489e-05	1.08712e-05
568	2.17004e-06	6.28298e-06	4.22651e-06
569	2.17004e-06	6.28298e-06	4.22651e-06
570	1.44669e-06	3.14149e-06	2.29409e-06
571	7.23345e-07	1.57074e-06	1.14704e-06
572	7.23345e-07	1.57074e-06	1.14704e-06
573	0	3.14149e-06	1.57074e-06
574	0	3.14149e-06	1.57074e-06
575	0	1.57074e-06	7.85372e-07
576	7.23345e-07	4.71223e-06	2.71779e-06
577	7.23345e-07	4.71223e-06	2.71779e-06
578	3.61673e-06	7.85372e-06	5.73522e-06
579	4.34007e-06	7.85372e-06	6.0969e-06
580	5.06342e-06	7.85372e-06	6.45857e-06
581	1.08502e-05	1.2566e-05	1.17081e-05
582	1.08502e-05	1.2566e-05	1.17081e-05
583	1.08502e-05	1.2566e-05	1.17081e-05
584	1.15735e-05	1.41367e-05	1.28551e-05
585	1.15735e-05	1.41367e-05	1.28551e-05
586	1.15735e-05	1.41367e-05	1.28551e-05
587	1.22969e-05	1.41367e-05	1.32168e-05
588	1.22969e-05	1.41367e-05	1.32168e-05
589	1.30202e-05	1.41367e-05	1.35785e-05
590	1.37436e-05	1.57074e-05	1.47255e-05
591	1.51902e-05	1.57074e-05	1.54488e-05
592	2.82105e-05	4.55516e-05	3.6881e-05
593	2.82105e-05	4.55516e-05	3.6881e-05
594	3.18272e-05	4.55516e-05	3.86894e-05
595	3.83373e-05	5.96883e-05	4.90128e-05
596	3.83373e-05	6.59712e-05	5.21543e-05
597	3.83373e-05	7.69665e-05	5.76519e-05
598	3.68906e-05	7.69665e-05	5.69285e-05
599	3.76139e-05	7.69665e-05	5.72902e-05
600	3.32739e-05	7.06835e-05	5.19787e-05
601	3.39972e-05	7.3825e-05	5.39111e-05
602	3.39972e-05	7.06835e-05	5.23403e-05
603	3.32739e-05	7.06835e-05	5.19787e-05
604	3.9784e-05	7.53957e-05	5.75898e-05
605	3.9784e-05	7.53957e-05	5.75898e-05
606	3.9784e-05	7.53957e-05	5.75898e-05
607	3.9784e-05	7.53957e-05	5.75898e-05
608	3.9784e-05	7.53957e-05	5.75898e-05
609	3.9784e-05	7.53957e-05	5.75898e-05
610	3.47206e-05	7.3825e-05	5.42728e-05
611	3.61673e-05	8.16787e-05	5.8923e-05
612	3.61673e-05	8.01079e-05	5.81376e-05
613	3.68906e-05	8.01079e-05	5.84993e-05
614	3.39972e-05	7.69665e-05	5.54818e-05
615	3.54439e-05	7.69665e-05	5.62052e-05
616	2.67638e-05	5.81175e-05	4.24406e-05
617	5.20808e-05	6.59712e-05	5.9026e-05
618	5.35275e-05	6.7542e-05	6.05348e-05
619	5.42509e-05	6.59712e-05	6.01111e-05
620	5.42509e-05	6.59712e-05	6.01111e-05
621	5.42509e-05	6.44005e-05	5.93257e-05
622	5.42509e-05	6.28298e-05	5.85403e-05
623	4.99108e-05	5.02638e-05	5.00873e-05
624	5.42509e-05	5.34053e-05	5.38281e-05
625	5.42509e-05	4.86931e-05	5.1472e-05
626	5.42509e-05	4.08393e-05	4.75451e-05
627	9.62049e-05	4.71223e-05	7.16636e-05
628	9.62049e-05	4.71223e-05	7.16636e-05
629	9.62049e-05	4.71223e-05	7.16636e-05
630	9.62049e-05	4.71223e-05	7.16636e-05
631	9.62049e-05	4.55516e-05	7.08782e-05
632	9.62049e-05	4.55516e-05	7.08782e-05
633	9.62049e-05	4.55516e-05	7.08782e-05
634	9.11415e-05	4.39808e-05	6.75612e-05
635	9.11415e-05	4.55516e-05	6.83465e-05
636	9.04181e-05	4.24101e-05	6.64141e-05
637	7.66746e-05	3.45564e-05	5.56155e-05
638	9.40349e-05	4.55516e-05	6.97932e-05
639	9.40349e-05	4.55516e-05	6.97932e-05
640	9.69282e-05	4.55516e-05	7.12399e-05
641	9.40349e-05	3.61271e-05	6.5081e-05
642	0.000103438	4.39808e-05	7.37096e-05
643	0.000104162	4.39808e-05	7.40713e-05
644	0.000104162	4.55516e-05	7.48566e-05
645	0.000104162	4.55516e-05	7.48566e-05
646	8.10147e-05	3.61271e-05	5.85709e-05
647	8.24613e-05	3.92686e-05	6.0865e-05
648	8.24613e-05	3.92686e-05	6.0865e-05
649	8.24613e-05	3.92686e-05	6.0865e-05
650	8.24613e-05	3.92686e-05	6.0865e-05
651	8.24613e-05	3.92686e-05	6.0865e-05
652	7.88446e-05	3.92686e-05	5.90566e-05
653	7.88446e-05	3.92686e-05	5.90566e-05
654	7.73979e-05	3.76979e-05	5.75479e-05
655	7.73979e-05	3.76979e-05	5.75479e-05
656	7.73979e-05	3.76979e-05	5.75479e-05
657	5.13575e-05	3.45564e-05	4.29569e-05
658	5.06342e-05	3.45564e-05	4.25953e-05
659	5.06342e-05	3.45564e-05	4.25953e-05
660	4.99108e-05	3.29856e-05	4.14482e-05
661	4.84641e-05	3.14149e-05	3.99395e-05
662	5.78676e-06	7.85372e-06	6.82024e-06
663	8.68014e-06	2.35612e-05	1.61207e-05
664	9.40349e-06	2.67026e-05	1.80531e-05
665	1.08502e-05	2.67026e-05	1.87764e-05
666	1.08502e-05	2.67026e-05	1.87764e-05
667	1.01268e-05	2.67026e-05	1.84147e-05
668	1.01268e-05	2.67026e-05	1.84147e-05
669	1.08502e-05	2.98441e-05	2.03472e-05
670	1.08502e-05	3.14149e-05	2.11325e-05
671	1.08502e-05	3.14149e-05	2.11325e-05
672	1.08502e-05	3.14149e-05	2.11325e-05
673	1.08502e-05	3.14149e-05	2.11325e-05
674	1.08502e-05	3.14149e-05	2.11325e-05
675	1.08502e-05	3.14149e-05	2.11325e-05
676	1.01268e-05	3.14149e-05	2.07709e-05
677	1.01268e-05	3.14149e-05	2.07709e-05
678	1.01268e-05	2.98441e-05	1.99855e-05
679	7.23345e-06	2.98441e-05	1.85388e-05
680	7.23345e-06	2.98441e-05	1.85388e-05
681	7.23345e-06	2.67026e-05	1.6968e-05
682	7.23345e-06	2.67026e-05	1.6968e-05
683	7.23345e-06	2.67026e-05	1.6968e-05
684	2.89338e-06	2.19904e-05	1.24419e-05
685	2.17004e-06	3.14149e-05	1.67925e-05
686	2.17004e-06	3.14149e-05	1.67925e-05
687	2.17004e-06	3.14149e-05	1.67925e-05
688	7.23345e-07	2.51319e-05	1.29276e-05
689	0	2.67026e-05	1.33513e-05
690	0	2.67026e-05	1.33513e-05
691	0	2.51319e-05	1.2566e-05
692	0	2.51319e-05	1.2566e-05
693	0	2.51319e-05	1.2566e-05
694	0	2.35612e-05	1.17806e-05
695	0	2.35612e-05	1.17806e-05
696	0	2.35612e-05	1.17806e-05
697	0	2.35612e-05	1.17806e-05
698	0	1.41367e-05	7.06835e-06
699	0	1.41367e-05	7.06835e-06
700	0	1.41367e-05	7.06835e-06
701	0	2.04197e-05	1.02098e-05
702	0	2.04197e-05	1.02098e-05
703	0	2.04197e-05	1.02098e-05
704	0	2.04197e-05	1.02098e-05
705	0	1.88489e-05	9.42446e-06
706	0	1.88489e-05	9.42446e-06
707	0	9.42446e-06	4.71223e-06
708	4.34007e-06	1.09952e-05	7.66764e-06
709	4.34007e-06	1.09952e-05	7.66764e-06
710	4.34007e-06	1.09952e-05	7.66764e-06
711	9.40349e-06	1.88489e-05	1.41262e-05
712	9.40349e-06	1.88489e-05	1.41262e-05
713	9.40349e-06	1.88489e-05	1.41262e-05
714	9.40349e-06	1.72782e-05	1.33408e-05
715	1.08502e-05	2.35612e-05	1.72057e-05
716	1.15735e-05	2.51319e-05	1.83527e-05
717	1.15735e-05	2.51319e-05	1.83527e-05
718	1.15735e-05	2.51319e-05	1.83527e-05
719	1.22969e-05	2.51319e-05	1.87144e-05
720	1.37436e-05	4.24101e-05	2.80768e-05
721	1.37436e-05	4.24101e-05	2.80768e-05
722	1.37436e-05	4.55516e-05	2.96476e-05
723	1.37436e-05	4.39808e-05	2.88622e-05
724	1.37436e-05	4.39808e-05	2.88622e-05
725	1.37436e-05	4.24101e-05	2.80768e-05
726	1.37436e-05	4.24101e-05	2.80768e-05
727	1.37436e-05	4.24101e-05	2.80768e-05
728	1.30202e-05	4.24101e-05	2.77151e-05
729	1.22969e-05	4.24101e-05	2.73535e-05
730	9.40349e-06	4.08393e-05	2.51214e-05
731	9.40349e-06	4.08393e-05	2.51214e-05
732	7.9568e-06	3.92686e-05	2.36127e-05
733	7.9568e-06	3.92686e-05	2.36127e-05
734	7.23345e-06	3.76979e-05	2.24657e-05
735	7.23345e-06	3.76979e-05	2.24657e-05
736	7.23345e-06	3.76979e-05	2.24657e-05
737	7.23345e-06	3.76979e-05	2.24657e-05
738	7.23345e-06	3.76979e-05	2.24657e-05
739	7.23345e-06	3.76979e-05	2.24657e-05
740	5.06342e-06	3.61271e-05	2.05953e-05
741	5.06342e-06	3.61271e-05	2.05953e-05
742	5.06342e-06	3.61271e-05	2.05953e-05
743	4.34007e-06	3.61271e-05	2.02336e-05
744	4.34007e-06	3.61271e-05	2.02336e-05
745	4.34007e-06	3.61271e-05	2.02336e-05
746	2.89338e-06	2.98441e-05	1.63688e-05
747	1.44669e-06	1.72782e-05	9.36244e-06
748	1.44669e-06	1.41367e-05	7.79169e-06
749	1.44669e-06	1.41367e-05	7.79169e-06
750	1.44669e-06	1.41367e-05	7.79169e-06
751	1.44669e-06	1.41367e-05	7.79169e-06
752	1.44669e-06	1.57074e-05	8.57706e-06
753	1.44669e-06	1.57074e-05	8.57706e-06
754	1.44669e-06	1.57074e-05	8.57706e-06
755	1.44669e-06	1.09952e-05	6.22095e-06
756	1.44669e-06	1.09952e-05	6.22095e-06
757	1.44669e-06	1.09952e-05	6.22095e-06
758	1.44669e-06	1.09952e-05	6.22095e-06
759	7.23345e-07	6.28298e-06	3.50316e-06
760	7.23345e-07	6.28298e-06	3.50316e-06
761	7.23345e-07	6.28298e-06	3.50316e-06
762	7.23345e-07	6.28298e-06	3.50316e-06
763	7.23345e-07	6.28298e-06	3.50316e-06
764	7.23345e-07	6.28298e-06	3.50316e-06
765	7.23345e-07	4.71223e-06	2.71779e-06
766	7.23345e-07	4.71223e-06	2.71779e-06
767	7.23345e-07	4.71223e-06	2.71779e-06
768	7.23345e-07	3.14149e-06	1.93242e-06
769	7.23345e-07	3.14149e-06	1.93242e-06
770	7.23345e-07	3.14149e-06	1.93242e-06
771	0	3.14149e-06	1.57074e-06
772	0	3.14149e-06	1.57074e-06
773	0	1.57074e-06	7.85372e-07
774	0	1.57074e-06	7.85372e-07
775	0	6.28298e-06	3.14149e-06
776	0	6.28298e-06	3.14149e-06
777	0	6.28298e-06	3.14149e-06
778	0	6.28298e-06	3.14149e-06
779	0	6.28298e-06	3.14149e-06
780	0	6.28298e-06	3.14149e-06
781	7.23345e-07	6.28298e-06	3.50316e-06
782	7.23345e-07	6.28298e-06	3.50316e-06
783	1.44669e-06	6.28298e-06	3.86483e-06
784	1.44669e-06	6.28298e-06	3.86483e-06
785	1.44669e-06	6.28298e-06	3.86483e-06
786	1.44669e-06	6.28298e-06	3.86483e-06
787	1.44669e-06	6.28298e-06	3.86483e-06
788	1.44669e-06	6.28298e-06	3.86483e-06
789	2.89338e-06	6.28298e-06	4.58818e-06
790	2.89338e-06	6.28298e-06	4.58818e-06
791	3.61673e-06	6.28298e-06	4.94985e-06
792	3.61673e-06	4.71223e-06	4.16448e-06
793	3.61673e-06	9.42446e-06	6.52059e-06
794	3.61673e-06	1.09952e-05	7.30597e-06
795	3.61673e-06	1.09952e-05	7.30597e-06
796	3.61673e-06	1.09952e-05	7.30597e-06
797	4.34007e-06	1.72782e-05	1.08091e-05
798	4.34007e-06	1.72782e-05	1.08091e-05
799	1.80836e-05	2.67026e-05	2.23931e-05
800	2.0977e-05	2.67026e-05	2.38398e-05
801	0.000121522	7.53957e-05	9.84588e-05
802	0.000133095	8.79617e-05	0.000110529
803	0.000133819	8.79617e-05	0.00011089
804	0.000142499	0.000100528	0.000121513
805	0.000143946	0.000100528	0.000122237
806	0.000143946	0.000100528	0.000122237
807	0.000144669	0.00010524	0.000124954
808	0.000145392	0.000109952	0.000127672
809	0.000145392	0.000109952	0.000127672
810	0.000149009	0.000111523	0.000130266
811	0.000149732	0.000111523	0.000130628
812	0.000149732	0.000111523	0.000130628
813	0.000149732	0.000111523	0.000130628
814	0.000157689	0.000150791	0.00015424
815	0.000157689	0.000150791	0.00015424
816	0.000158413	0.000150791	0.000154602
817	0.000158413	0.000150791	0.000154602
818	0.000158413	0.000150791	0.000154602
819	0.000158413	0.000150791	0.000154602
820	0.000159136	0.000150791	0.000154964
821	0.000159136	0.000150791	0.000154964
822	0.000146116	0.000142938	0.000144527
823	0.000137436	0.000133513	0.000135474
824	7.9568e-05	9.11031e-05	8.53356e-05
825	9.04181e-05	9.58154e-05	9.31168e-05
826	8.89714e-05	9.58154e-05	9.23934e-05
827	8.89714e-05	9.58154e-05	9.23934e-05
828	8.82481e-05	9.42446e-05	9.12464e-05
829	6.94411e-05	9.26739e-05	8.10575e-05
830	4.99108e-05	8.48202e-05	6.73655e-05
831	5.13575e-05	8.48202e-05	6.80888e-05
832	5.13575e-05	8.48202e-05	6.80888e-05
833	3.9784e-05	6.59712e-05	5.28776e-05
834	2.96571e-05	2.51319e-05	2.73945e-05
835	3.11038e-05	2.51319e-05	2.81179e-05
836	3.11038e-05	2.51319e-05	2.81179e-05
837	3.11038e-05	2.19904e-05	2.65471e-05
838	3.11038e-05	2.04197e-05	2.57618e-05
839	2.67638e-05	1.88489e-05	2.28063e-05
840	2.24237e-05	1.2566e-05	1.74948e-05
841	2.24237e-05	1.72782e-05	1.98509e-05
842	2.0977e-05	1.72782e-05	1.91276e-05
843	2.02537e-05	1.72782e-05	1.87659e-05
844	2.02537e-05	1.57074e-05	1.79806e-05
845	9.40349e-06	9.42446e-06	9.41397e-06
846	1.15735e-05	1.57074e-05	1.36405e-05
847	9.40349e-06	1.41367e-05	1.17701e-05
848	3.03805e-05	4.08393e-05	3.56099e-05
849	3.18272e-05	4.08393e-05	3.63333e-05
850	3.11038e-05	4.39808e-05	3.75423e-05
851	3.11038e-05	4.39808e-05	3.75423e-05
852	2.96571e-05	4.39808e-05	3.6819e-05
853	3.61673e-05	7.69665e-05	5.65669e-05
854	3.61673e-05	7.69665e-05	5.65669e-05
855	3.61673e-05	7.69665e-05	5.65669e-05
856	3.61673e-05	7.69665e-05	5.65669e-05
857	3.61673e-05	7.69665e-05	5.65669e-05
858	3.61673e-05	8.01079e-05	5.81376e-05
859	3.61673e-05	8.01079e-05	5.81376e-05
860	3.54439e-05	7.85372e-05	5.69906e-05
861	3.54439e-05	7.53957e-05	5.54198e-05
862	3.61673e-05	7.69665e-05	5.65669e-05
863	3.61673e-05	7.69665e-05	5.65669e-05
864	3.54439e-05	7.69665e-05	5.62052e-05
865	3.54439e-05	7.69665e-05	5.62052e-05
866	3.54439e-05	7.69665e-05	5.62052e-05
867	2.02537e-05	6.7542e-05	4.38978e-05
868	1.95303e-05	6.7542e-05	4.35362e-05
869	2.02537e-05	6.7542e-05	4.38978e-05
870	1.95303e-05	6.7542e-05	4.35362e-05
871	1.37436e-05	6.1259e-05	3.75013e-05
872	1.37436e-05	6.1259e-05	3.75013e-05
873	1.37436e-05	5.4976e-05	3.43598e-05
874	5.78676e-06	3.61271e-05	2.09569e-05
875	5.78676e-06	3.61271e-05	2.09569e-05
876	5.06342e-06	2.51319e-05	1.50977e-05
877	5.06342e-06	2.35612e-05	1.43123e-05
878	5.06342e-06	2.35612e-05	1.43123e-05
879	4.34007e-06	1.88489e-05	1.15945e-05
880	5.06342e-06	1.88489e-05	1.19562e-05
881	5.06342e-06	1.88489e-05	1.19562e-05
882	5.06342e-06	1.88489e-05	1.19562e-05
883	5.06342e-06	1.88489e-05	1.19562e-05
884	5.06342e-06	1.72782e-05	1.11708e-05
885	4.34007e-06	1.57074e-05	1.00238e-05
886	3.61673e-06	3.14149e-06	3.37911e-06
887	3.61673e-06	3.14149e-06	3.37911e-06
888	3.61673e-06	3.14149e-06	3.37911e-06
889	3.61673e-06	3.14149e-06	3.37911e-06
890	3.61673e-06	4.71223e-06	4.16448e-06
891	3.61673e-06	4.71223e-06	4.16448e-06
892	3.61673e-06	4.71223e-06	4.16448e-06
893	2.89338e-06	3.14149e-06	3.01743e-06
894	4.34007e-06	7.85372e-06	6.0969e-06
895	4.34007e-06	7.85372e-06	6.0969e-06
896	4.34007e-06	7.85372e-06	6.0969e-06
897	4.34007e-06	7.85372e-06	6.0969e-06
898	4.34007e-06	7.85372e-06	6.0969e-06
899	4.34007e-06	7.85372e-06	6.0969e-06
900	3.61673e-06	7.85372e-06	5.73522e-06
901	2.89338e-06	7.85372e-06	5.37355e-06
902	7.23345e-06	1.72782e-05	1.22558e-05
903	7.23345e-06	1.72782e-05	1.22558e-05
904	7.23345e-06	1.72782e-05	1.22558e-05
905	6.51011e-06	1.72782e-05	1.18941e-05
906	6.51011e-06	1.88489e-05	1.26795e-05
907	6.51011e-06	1.88489e-05	1.26795e-05
908	8.68014e-06	2.19904e-05	1.53353e-05
909	8.68014e-06	2.19904e-05	1.53353e-05
910	1.08502e-05	2.19904e-05	1.64203e-05
911	1.08502e-05	2.19904e-05	1.64203e-05
912	1.08502e-05	2.19904e-05	1.64203e-05
913	1.01268e-05	2.04197e-05	1.52733e-05
914	1.51902e-05	3.14149e-05	2.33026e-05
915	1.51902e-05	3.29856e-05	2.40879e-05
916	1.51902e-05	3.29856e-05	2.40879e-05
917	1.51902e-05	3.29856e-05	2.40879e-05
918	1.59136e-05	3.29856e-05	2.44496e-05
919	1.59136e-05	3.14149e-05	2.36642e-05
920	1.73603e-05	3.76979e-05	2.75291e-05
921	1.73603e-05	3.76979e-05	2.75291e-05
922	1.59136e-05	3.14149e-05	2.36642e-05
923	1.95303e-05	4.08393e-05	3.01848e-05
924	1.95303e-05	4.08393e-05	3.01848e-05
925	1.95303e-05	4.08393e-05	3.01848e-05
926	1.95303e-05	4.08393e-05	3.01848e-05
927	1.95303e-05	4.08393e-05	3.01848e-05
928	1.95303e-05	4.08393e-05	3.01848e-05
929	1.95303e-05	4.08393e-05	3.01848e-05
930	1.95303e-05	4.08393e-05	3.01848e-05
931	1.95303e-05	4.08393e-05	3.01848e-05
932	1.95303e-05	4.08393e-05	3.01848e-05
933	1.95303e-05	4.08393e-05	3.01848e-05
934	1.73603e-05	4.08393e-05	2.90998e-05
935	1.44669e-05	4.08393e-05	2.76531e-05
936	1.37436e-05	3.92686e-05	2.65061e-05
937	8.68014e-06	3.29856e-05	2.08329e-05
938	5.78676e-06	2.04197e-05	1.31032e-05
939	1.01268e-05	2.04197e-05	1.52733e-05
940	1.01268e-05	2.04197e-05	1.52733e-05
941	1.01268e-05	2.04197e-05	1.52733e-05
942	1.01268e-05	2.04197e-05	1.52733e-05
943	9.40349e-06	1.41367e-05	1.17701e-05
944	1.66369e-05	1.57074e-05	1.61722e-05
945	1.66369e-05	1.41367e-05	1.53868e-05
946	1.59136e-05	1.41367e-05	1.50251e-05
947	1.59136e-05	1.41367e-05	1.50251e-05
948	1.59136e-05	1.41367e-05	1.50251e-05
949	1.22969e-05	4.71223e-06	8.50455e-06
950	1.37436e-05	4.71223e-06	9.22789e-06
951	1.37436e-05	4.71223e-06	9.22789e-06
952	1.37436e-05	4.71223e-06	9.22789e-06
953	1.51902e-05	4.71223e-06	9.95124e-06
954	1.51902e-05	4.71223e-06	9.95124e-06
955	1.51902e-05	4.71223e-06	9.95124e-06
956	1.51902e-05	4.71223e-06	9.95124e-06
957	1.51902e-05	4.71223e-06	9.95124e-06
958	1.30202e-05	4.71223e-06	8.86622e-06
959	1.30202e-05	4.71223e-06	8.86622e-06
960	1.30202e-05	4.71223e-06	8.86622e-06
961	1.30202e-05	4.71223e-06	8.86622e-06
962	1.30202e-05	4.71223e-06	8.86622e-06
963	6.51011e-06	4.71223e-06	5.61117e-06
964	3.61673e-06	1.57074e-06	2.59373e-06
965	3.61673e-06	1.57074e-06	2.59373e-06
966	3.61673e-06	1.57074e-06	2.59373e-06
967	3.61673e-06	1.57074e-06	2.59373e-06
968	7.23345e-06	4.71223e-06	5.97284e-06
969	7.23345e-06	4.71223e-06	5.97284e-06
970	7.9568e-06	4.71223e-06	6.33451e-06
971	1.44669e-05	1.41367e-05	1.43018e-05
972	1.51902e-05	1.41367e-05	1.46635e-05
973	1.59136e-05	1.41367e-05	1.50251e-05
974	3.25505e-05	1.72782e-05	2.49144e-05
975	3.25505e-05	1.72782e-05	2.49144e-05
976	3.39972e-05	1.72782e-05	2.56377e-05
977	3.47206e-05	1.72782e-05	2.59994e-05
978	3.47206e-05	1.72782e-05	2.59994e-05
979	3.47206e-05	1.72782e-05	2.59994e-05
980	3.47206e-05	1.72782e-05	2.59994e-05
981	3.47206e-05	1.72782e-05	2.59994e-05
982	3.47206e-05	1.72782e-05	2.59994e-05
983	3.47206e-05	1.72782e-05	2.59994e-05
984	3.47206e-05	1.72782e-05	2.59994e-05
985	3.47206e-05	1.72782e-05	2.59994e-05
986	3.47206e-05	1.72782e-05	2.59994e-05
987	3.47206e-05	1.57074e-05	2.5214e-05
988	3.32739e-05	1.57074e-05	2.44907e-05
989	3.25505e-05	1.57074e-05	2.4129e-05
990	2.89338e-05	1.41367e-05	2.15352e-05
991	2.60404e-05	1.09952e-05	1.85178e-05
992	2.60404e-05	1.09952e-05	1.85178e-05
993	2.53171e-05	1.09952e-05	1.81561e-05
994	2.53171e-05	1.09952e-05	1.81561e-05
995	1.80836e-05	6.28298e-06	1.21833e-05
996	1.51902e-05	4.71223e-06	9.95124e-06
997	5.06342e-06	1.57074e-06	3.31708e-06
998	5.06342e-06	0	2.53171e-06
999	5.06342e-06	0	2.53171e-06
1000	5.06342e-06	0	2.53171e-06
1001	5.06342e-06	0	2.53171e-06
1002	5.06342e-06	0	2.53171e-06
1003	5.06342e-06	0	2.53171e-06
1004	2.89338e-06	0	1.44669e-06
1005	2.89338e-06	3.14149e-06	3.01743e-06
1006	2.89338e-06	3.14149e-06	3.01743e-06
1007	2.89338e-06	4.71223e-06	3.80281e-06
1008	2.89338e-06	4.71223e-06	3.80281e-06
1009	1.44669e-06	4.71223e-06	3.07946e-06
1010	1.44669e-06	6.28298e-06	3.86483e-06
1011	1.44669e-06	6.28298e-06	3.86483e-06
1012	1.44669e-06	6.28298e-06	3.86483e-06
1013	7.23345e-07	6.28298e-06	3.50316e-06
1014	7.23345e-07	7.85372e-06	4.28853e-06
1015	7.23345e-07	7.85372e-06	4.28853e-06
1016	1.44669e-06	1.57074e-05	8.57706e-06
1017	1.44669e-06	1.72782e-05	9.36244e-06
1018	1.44669e-06	1.88489e-05	1.01478e-05
1019	1.44669e-06	2.04197e-05	1.09332e-05
1020	1.44669e-06	2.04197e-05	1.09332e-05
1021	1.44669e-06	2.04197e-05	1.09332e-05
1022	1.44669e-06	2.04197e-05	1.09332e-05
1023	1.44669e-06	2.04197e-05	1.09332e-05
1024	1.44669e-06	2.04197e-05	1.09332e-05
1025	1.44669e-06	2.04197e-05	1.09332e-05
1026	1.44669e-06	1.88489e-05	1.01478e-05
1027	1.44669e-06	1.88489e-05	1.01478e-05
1028	1.44669e-06	1.88489e-05	1.01478e-05
1029	1.44669e-06	1.88489e-05	1.01478e-05
1030	1.44669e-06	2.04197e-05	1.09332e-05
1031	1.44669e-06	2.04197e-05	1.09332e-05
1032	1.44669e-06	2.04197e-05	1.09332e-05
1033	1.44669e-06	1.72782e-05	9.36244e-06
1034	1.44669e-06	1.72782e-05	9.36244e-06
1035	1.44669e-06	1.72782e-05	9.36244e-06
1036	1.44669e-06	1.57074e-05	8.57706e-06
1037	7.23345e-07	1.09952e-05	5.85928e-06
1038	7.23345e-07	1.09952e-05	5.85928e-06
1039	7.23345e-07	1.09952e-05	5.85928e-06
1040	7.23345e-07	1.09952e-05	5.85928e-06
1041	7.23345e-07	4.71223e-06	2.71779e-06
1042	3.61673e-06	1.2566e-05	8.09134e-06
1043	3.61673e-06	1.2566e-05	8.09134e-06
1044	3.61673e-06	1.2566e-05	8.09134e-06
1045	4.34007e-06	1.2566e-05	8.45301e-06
1046	5.06342e-06	1.57074e-05	1.03854e-05
1047	5.06342e-06	1.57074e-05	1.03854e-05
1048	5.78676e-06	1.41367e-05	9.96173e-06
1049	5.49742e-05	4.86931e-05	5.18336e-05
1050	5.64209e-05	4.86931e-05	5.2557e-05
1051	5.64209e-05	4.86931e-05	5.2557e-05
1052	5.64209e-05	4.86931e-05	5.2557e-05
1053	5.64209e-05	4.86931e-05	5.2557e-05
1054	5.71443e-05	4.86931e-05	5.29187e-05
1055	5.71443e-05	4.86931e-05	5.29187e-05
1056	5.71443e-05	4.86931e-05	5.29187e-05
1057	5.71443e-05	4.71223e-05	5.21333e-05
1058	5.71443e-05	4.71223e-05	5.21333e-05
1059	5.93143e-05	4.86931e-05	5.40037e-05
1060	5.8591e-05	4.86931e-05	5.3642e-05
1061	5.78676e-05	4.86931e-05	5.32803e-05
1062	9.83749e-05	0.00010524	0.000101807
1063	0.000115012	0.000109952	0.000112482
1064	0.000117182	0.000111523	0.000114352
1065	0.000159859	0.000149221	0.00015454
1066	0.000161306	0.000153933	0.000157619
1067	0.000161306	0.000153933	0.000157619
1068	0.000160583	0.000155504	0.000158043
1069	0.000159859	0.000155504	0.000157681
1070	0.000159859	0.000155504	0.000157681
1071	0.000159136	0.000155504	0.00015732
1072	0.000156243	0.000153933	0.000155088
1073	0.000155519	0.000157074	0.000156297
1074	0.000155519	0.000157074	0.000156297
1075	0.000147562	0.000150791	0.000149177
1076	0.000148286	0.000166499	0.000157392
1077	0.000148286	0.000166499	0.000157392
1078	0.000148286	0.000166499	0.000157392
1079	0.000148286	0.00016807	0.000158178
1080	0.000141776	0.000161787	0.000151781
1081	0.000139606	0.000160216	0.000149911
1082	0.000138882	0.000158645	0.000148764
1083	0.000133819	0.000158645	0.000146232
1084	0.000129479	0.000155504	0.000142491
1085	4.84641e-05	0.000100528	7.44959e-05
1086	4.91875e-05	0.000114664	8.19259e-05
1087	4.84641e-05	0.000114664	8.15642e-05
1088	4.84641e-05	0.000114664	8.15642e-05
1089	4.41241e-05	0.000113094	7.86088e-05
1090	3.18272e-05	0.000103669	6.77481e-05
1091	2.89338e-05	0.000103669	6.63015e-05
1092	1.73603e-05	7.3825e-05	4.55926e-05
1093	2.24237e-05	7.69665e-05	4.96951e-05
1094	2.24237e-05	7.3825e-05	4.81243e-05
1095	1.95303e-05	6.7542e-05	4.35362e-05
1096	1.37436e-05	4.86931e-05	3.12183e-05
1097	1.66369e-05	5.18346e-05	3.42357e-05
1098	1.66369e-05	5.18346e-05	3.42357e-05
1099	1.37436e-05	3.92686e-05	2.65061e-05
1100	1.37436e-05	3.92686e-05	2.65061e-05
1101	1.30202e-05	3.29856e-05	2.30029e-05
1102	1.51902e-05	3.29856e-05	2.40879e-05
1103	1.51902e-05	2.98441e-05	2.25172e-05
1104	1.59136e-05	3.14149e-05	2.36642e-05
1105	1.37436e-05	2.98441e-05	2.17938e-05
1106	1.37436e-05	2.98441e-05	2.17938e-05
1107	1.37436e-05	2.98441e-05	2.17938e-05
1108	1.37436e-05	2.98441e-05	2.17938e-05
1109	1.37436e-05	2.98441e-05	2.17938e-05
1110	1.37436e-05	2.19904e-05	1.7867e-05
1111	1.44669e-05	2.04197e-05	1.74433e-05
1112	8.68014e-06	1.09952e-05	9.83767e-06
1113	2.89338e-05	3.14149e-05	3.01743e-05
1114	2.96571e-05	3.29856e-05	3.13214e-05
1115	3.39972e-05	3.29856e-05	3.34914e-05
1116	3.83373e-05	4.24101e-05	4.03737e-05
1117	3.61673e-05	3.92686e-05	3.77179e-05
1118	6.0761e-05	5.81175e-05	5.94393e-05
1119	6.0761e-05	5.81175e-05	5.94393e-05
1120	6.14843e-05	5.81175e-05	5.98009e-05
1121	8.31847e-05	0.000108381	9.5783e-05
1122	8.31847e-05	0.000108381	9.5783e-05
1123	8.46314e-05	0.000108381	9.65064e-05
1124	8.46314e-05	0.000108381	9.65064e-05
1125	8.82481e-05	0.000106811	9.75293e-05
1126	0.000122969	0.000141367	0.000132168
1127	0.000124415	0.000141367	0.000132891
1128	0.000130202	0.000141367	0.000135785
1129	0.000133819	0.000141367	0.000137593
1130	0.00018807	0.000171211	0.00017964
1131	0.000193856	0.000175923	0.00018489
1132	0.000193856	0.000175923	0.00018489
1133	0.000193856	0.000175923	0.00018489
1134	0.000193856	0.000175923	0.00018489
1135	0.000191686	0.000175923	0.000183805
1136	0.000191686	0.000175923	0.000183805
1137	0.00017722	0.000174353	0.000175786
1138	0.000169986	0.00016964	0.000169813
1139	0.00021411	0.000193202	0.000203656
1140	0.00021628	0.000196343	0.000206312
1141	0.00021628	0.000196343	0.000206312
1142	0.00021628	0.000194772	0.000205526
1143	0.000217004	0.000194772	0.000205888
1144	0.000217004	0.000194772	0.000205888
1145	0.00021194	0.00019006	0.000201
1146	0.000208323	0.00019006	0.000199192
1147	0.000206153	0.000185348	0.000195751
1148	0.000165646	0.000150791	0.000158219
1149	0.000165646	0.000153933	0.000159789
1150	0.000164923	0.000150791	0.000157857
1151	0.000111395	0.000106811	0.000109103
1152	0.000112118	0.00010524	0.000108679
1153	0.000110672	9.58154e-05	0.000103244
1154	0.000109948	0.000100528	0.000105238
1155	0.000109948	0.000100528	0.000105238
1156	0.000104162	9.58154e-05	9.99885e-05
1157	0.000105608	0.00010524	0.000105424
1158	0.000105608	0.000106811	0.000106209
1159	0.000101992	0.000106811	0.000104401
1160	9.76516e-05	0.000106811	0.000102231
1161	9.69282e-05	0.000106811	0.000101869
1162	9.25882e-05	0.000103669	9.81286e-05
1163	2.24237e-05	5.81175e-05	4.02706e-05
1164	2.60404e-05	5.65468e-05	4.12936e-05
1165	2.0977e-05	4.55516e-05	3.32643e-05
1166	1.73603e-05	3.14149e-05	2.43876e-05
1167	2.24237e-05	5.34053e-05	3.79145e-05
1168	2.24237e-05	5.34053e-05	3.79145e-05
1169	1.73603e-05	4.39808e-05	3.06706e-05
1170	1.73603e-05	5.4976e-05	3.61682e-05
1171	1.73603e-05	6.1259e-05	3.93096e-05
1172	1.73603e-05	6.1259e-05	3.93096e-05
1173	2.24237e-05	6.7542e-05	4.49828e-05
1174	2.45937e-05	7.06835e-05	4.76386e-05
1175	2.53171e-05	7.06835e-05	4.80003e-05
1176	2.45937e-05	6.28298e-05	4.37117e-05
1177	2.67638e-05	7.69665e-05	5.18651e-05
1178	2.67638e-05	7.69665e-05	5.18651e-05
1179	2.67638e-05	7.69665e-05	5.18651e-05
1180	2.67638e-05	7.69665e-05	5.18651e-05
1181	2.67638e-05	7.69665e-05	5.18651e-05
1182	2.53171e-05	7.06835e-05	4.80003e-05
1183	2.53171e-05	7.22542e-05	4.87857e-05
1184	2.45937e-05	7.06835e-05	4.76386e-05
1185	2.45937e-05	6.91127e-05	4.68532e-05
1186	2.02537e-05	6.28298e-05	4.15417e-05
1187	2.02537e-05	6.28298e-05	4.15417e-05
1188	2.02537e-05	6.28298e-05	4.15417e-05
1189	2.02537e-05	6.28298e-05	4.15417e-05
1190	2.02537e-05	6.28298e-05	4.15417e-05
1191	1.95303e-05	5.81175e-05	3.88239e-05
1192	1.95303e-05	5.81175e-05	3.88239e-05
1193	1.95303e-05	5.81175e-05	3.88239e-05
1194	1.95303e-05	5.81175e-05	3.88239e-05
1195	1.51902e-05	5.02638e-05	3.2727e-05
1196	1.51902e-05	4.71223e-05	3.11563e-05
1197	1.51902e-05	4.71223e-05	3.11563e-05
1198	4.34007e-06	3.14149e-06	3.74078e-06
1199	5.06342e-06	3.14149e-06	4.10245e-06
1200	2.89338e-06	1.57074e-06	2.23206e-06
1201	2.89338e-06	1.57074e-06	2.23206e-06
1202	4.34007e-06	1.57074e-06	2.95541e-06
1203	1.73603e-05	0	8.68014e-06
1204	1.80836e-05	0	9.04181e-06
1205	1.80836e-05	0	9.04181e-06
1206	1.73603e-05	0	8.68014e-06
1207	1.80836e-05	0	9.04181e-06
1208	1.8807e-05	3.14149e-06	1.09742e-05
1209	1.8807e-05	4.71223e-06	1.17596e-05
1210	1.8807e-05	4.71223e-06	1.17596e-05
1211	1.8807e-05	4.71223e-06	1.17596e-05
1212	1.8807e-05	4.71223e-06	1.17596e-05
1213	1.8807e-05	4.71223e-06	1.17596e-05
1214	1.8807e-05	4.71223e-06	1.17596e-05
1215	1.8807e-05	4.71223e-06	1.17596e-05
1216	1.8807e-05	4.71223e-06	1.17596e-05
1217	1.8807e-05	6.28298e-06	1.2545e-05
1218	1.8807e-05	6.28298e-06	1.2545e-05
1219	1.8807e-05	6.28298e-06	1.2545e-05
1220	2.24237e-05	3.29856e-05	2.77047e-05
1221	2.24237e-05	3.29856e-05	2.77047e-05
1222	2.0977e-05	3.45564e-05	2.77667e-05
1223	2.0977e-05	3.45564e-05	2.77667e-05
1224	1.95303e-05	3.45564e-05	2.70433e-05
1225	1.95303e-05	3.45564e-05	2.70433e-05
1226	1.95303e-05	3.45564e-05	2.70433e-05
1227	1.95303e-05	3.45564e-05	2.70433e-05
1228	1.01268e-05	3.45564e-05	2.23416e-05
1229	8.68014e-06	3.14149e-05	2.00475e-05
1230	5.78676e-06	2.98441e-05	1.78154e-05
1231	5.78676e-06	2.98441e-05	1.78154e-05
1232	5.06342e-06	2.98441e-05	1.74538e-05
1233	3.03805e-05	0.000171211	0.000100796
1234	3.18272e-05	0.000182206	0.000107017
1235	3.32739e-05	0.000196343	0.000114808
1236	3.32739e-05	0.000196343	0.000114808
1237	3.39972e-05	0.000196343	0.00011517
1238	3.39972e-05	0.000196343	0.00011517
1239	3.18272e-05	0.000196343	0.000114085
1240	3.32739e-05	0.000199484	0.000116379
1241	3.32739e-05	0.000199484	0.000116379
1242	3.32739e-05	0.000197914	0.000115594
1243	3.18272e-05	0.000191631	0.000111729
1244	3.25505e-05	0.000191631	0.000112091
1245	3.25505e-05	0.000191631	0.000112091
1246	3.32739e-05	0.000191631	0.000112452
1247	3.32739e-05	0.000191631	0.000112452
1248	3.32739e-05	0.000191631	0.000112452
1249	3.32739e-05	0.000191631	0.000112452
1250	3.32739e-05	0.000191631	0.000112452
1251	3.32739e-05	0.000191631	0.000112452
1252	3.25505e-05	0.000191631	0.000112091
1253	3.18272e-05	0.000191631	0.000111729
1254	2.24237e-05	0.000180636	0.00010153
1255	5.06342e-06	2.51319e-05	1.50977e-05
1256	5.78676e-06	2.35612e-05	1.4674e-05
1257	5.78676e-06	2.35612e-05	1.4674e-05
1258	5.06342e-06	2.35612e-05	1.43123e-05
1259	3.61673e-06	1.41367e-05	8.87671e-06
1260	9.40349e-06	2.04197e-05	1.49116e-05
1261	9.40349e-06	1.88489e-05	1.41262e-05
1262	8.68014e-06	1.72782e-05	1.29792e-05
1263	8.68014e-06	1.57074e-05	1.21938e-05
1264	7.9568e-06	1.57074e-05	1.18321e-05
1265	9.40349e-06	1.57074e-05	1.25555e-05
1266	9.40349e-06	1.57074e-05	1.25555e-05
1267	9.40349e-06	1.57074e-05	1.25555e-05
1268	1.15735e-05	2.04197e-05	1.59966e-05
1269	1.15735e-05	2.04197e-05	1.59966e-05
1270	1.15735e-05	2.04197e-05	1.59966e-05
1271	1.15735e-05	2.04197e-05	1.59966e-05
1272	1.15735e-05	2.04197e-05	1.59966e-05
1273	1.15735e-05	1.88489e-05	1.52112e-05
1274	1.30202e-05	2.04197e-05	1.67199e-05
1275	1.30202e-05	1.41367e-05	1.35785e-05
1276	1.30202e-05	1.41367e-05	1.35785e-05
1277	1.30202e-05	1.41367e-05	1.35785e-05
1278	1.44669e-05	2.04197e-05	1.74433e-05
1279	1.44669e-05	2.04197e-05	1.74433e-05
1280	1.44669e-05	2.04197e-05	1.74433e-05
1281	1.44669e-05	2.04197e-05	1.74433e-05
1282	1.44669e-05	2.04197e-05	1.74433e-05
1283	1.37436e-05	1.57074e-05	1.47255e-05
1284	1.44669e-05	1.88489e-05	1.66579e-05
1285	1.15735e-05	1.88489e-05	1.52112e-05
1286	8.68014e-06	1.88489e-05	1.37645e-05
1287	5.56976e-05	4.24101e-05	4.90538e-05
1288	5.56976e-05	4.39808e-05	4.98392e-05
1289	5.49742e-05	4.39808e-05	4.94775e-05
1290	5.93143e-05	5.18346e-05	5.55744e-05
1291	5.93143e-05	5.18346e-05	5.55744e-05
1292	5.93143e-05	4.86931e-05	5.40037e-05
1293	6.00376e-05	4.86931e-05	5.43654e-05
1294	6.0761e-05	4.86931e-05	5.4727e-05
1295	6.22077e-05	4.86931e-05	5.54504e-05
1296	6.22077e-05	4.86931e-05	5.54504e-05
1297	6.22077e-05	4.86931e-05	5.54504e-05
1298	6.14843e-05	4.55516e-05	5.3518e-05
1299	7.52279e-05	4.86931e-05	6.19605e-05
1300	8.10147e-05	5.02638e-05	6.56392e-05
1301	0.000102715	6.44005e-05	8.35578e-05
1302	0.000102715	6.59712e-05	8.43431e-05
1303	0.000102715	6.59712e-05	8.43431e-05
1304	0.000102715	6.44005e-05	8.35578e-05
1305	0.000101992	6.44005e-05	8.31961e-05
1306	0.000149732	0.000116235	0.000132984
1307	0.000149009	0.000117806	0.000133407
1308	0.000149009	0.000117806	0.000133407
1309	0.000147562	0.000116235	0.000131899
1310	0.000146839	0.000116235	0.000131537
1311	0.000112118	9.89569e-05	0.000105538
1312	0.000106332	8.95324e-05	9.79321e-05
1313	0.000127309	0.000109952	0.00011863
1314	0.000127309	0.000109952	0.00011863
1315	0.000127309	0.000109952	0.00011863
1316	0.000127309	0.000109952	0.00011863
1317	0.000127309	0.000109952	0.00011863
1318	0.000126585	0.000109952	0.000118269
1319	0.000126585	0.000109952	0.000118269
1320	0.000124415	0.000108381	0.000116398
1321	0.000122245	0.000108381	0.000115313
1322	0.000117182	0.00010524	0.000111211
1323	0.000104885	0.000102098	0.000103492
1324	0.000101992	9.89569e-05	0.000100474
1325	8.68014e-05	8.79617e-05	8.73815e-05
1326	8.82481e-05	0.000103669	9.59586e-05
1327	8.31847e-05	9.89569e-05	9.10708e-05
1328	8.31847e-05	9.89569e-05	9.10708e-05
1329	8.10147e-05	9.89569e-05	8.99858e-05
1330	7.9568e-05	9.73861e-05	8.8477e-05
1331	4.77408e-05	8.63909e-05	6.70658e-05
1332	1.80836e-05	5.4976e-05	3.65298e-05
1333	1.80836e-05	6.1259e-05	3.96713e-05
1334	1.8807e-05	5.4976e-05	3.68915e-05
1335	1.8807e-05	5.34053e-05	3.61061e-05
1336	1.66369e-05	4.86931e-05	3.2665e-05
1337	1.73603e-05	5.02638e-05	3.3812e-05
1338	1.73603e-05	5.02638e-05	3.3812e-05
1339	1.73603e-05	5.02638e-05	3.3812e-05
1340	1.59136e-05	4.71223e-05	3.1518e-05
1341	1.01268e-05	3.76979e-05	2.39123e-05
1342	1.01268e-05	3.76979e-05	2.39123e-05
1343	1.01268e-05	3.76979e-05	2.39123e-05
1344	1.01268e-05	3.61271e-05	2.3127e-05
1345	7.23345e-06	2.82734e-05	1.77534e-05
1346	6.51011e-06	2.82734e-05	1.73917e-05
1347	4.34007e-06	2.19904e-05	1.31652e-05
1348	5.06342e-06	2.35612e-05	1.43123e-05
1349	7.23345e-06	3.14149e-05	1.93242e-05
1350	7.9568e-06	4.24101e-05	2.51834e-05
1351	8.68014e-06	4.24101e-05	2.55451e-05
1352	9.40349e-06	4.24101e-05	2.59068e-05
1353	9.40349e-06	4.24101e-05	2.59068e-05
1354	9.40349e-06	4.08393e-05	2.51214e-05
1355	9.40349e-06	3.92686e-05	2.4336e-05
1356	9.40349e-06	3.76979e-05	2.35507e-05
1357	8.68014e-06	3.14149e-05	2.00475e-05
1358	1.08502e-05	4.55516e-05	2.82009e-05
1359	1.08502e-05	4.71223e-05	2.89862e-05
1360	1.08502e-05	4.71223e-05	2.89862e-05
1361	1.08502e-05	4.71223e-05	2.89862e-05
1362	1.08502e-05	4.71223e-05	2.89862e-05
1363	1.08502e-05	4.71223e-05	2.89862e-05
1364	1.08502e-05	4.55516e-05	2.82009e-05
1365	1.15735e-05	4.55516e-05	2.85625e-05
1366	1.15735e-05	4.55516e-05	2.85625e-05
1367	1.15735e-05	4.55516e-05	2.85625e-05
1368	7.23345e-06	3.29856e-05	2.01095e-05
1369	7.9568e-06	4.39808e-05	2.59688e-05
1370	7.9568e-06	4.39808e-05	2.59688e-05
1371	7.9568e-06	4.39808e-05	2.59688e-05
1372	6.51011e-06	4.08393e-05	2.36747e-05
1373	6.51011e-06	4.08393e-05	2.36747e-05
1374	5.78676e-06	3.92686e-05	2.25277e-05
1375	5.78676e-06	3.45564e-05	2.01716e-05
1376	5.06342e-06	3.45564e-05	1.98099e-05
1377	4.34007e-06	3.45564e-05	1.94482e-05
1378	1.37436e-05	7.22542e-05	4.29989e-05
1379	1.37436e-05	7.22542e-05	4.29989e-05
1380	1.37436e-05	7.22542e-05	4.29989e-05
1381	1.37436e-05	7.3825e-05	4.37843e-05
1382	1.37436e-05	7.3825e-05	4.37843e-05
1383	1.37436e-05	7.22542e-05	4.29989e-05
1384	1.30202e-05	6.59712e-05	3.94957e-05
1385	1.95303e-05	0.000131942	7.57364e-05
1386	1.95303e-05	0.000139796	7.96633e-05
1387	1.95303e-05	0.000139796	7.96633e-05
1388	1.95303e-05	0.000139796	7.96633e-05
1389	1.8807e-05	0.000139796	7.93016e-05
1390	1.8807e-05	0.000139796	7.93016e-05
1391	1.8807e-05	0.000139796	7.93016e-05
1392	1.8807e-05	0.000139796	7.93016e-05
1393	1.8807e-05	0.000146079	8.24431e-05
1394	1.8807e-05	0.000146079	8.24431e-05
1395	1.95303e-05	0.000146079	8.28048e-05
1396	1.8807e-05	0.000144508	8.16577e-05
1397	1.8807e-05	0.000152362	8.55846e-05
1398	1.8807e-05	0.000152362	8.55846e-05
1399	1.59136e-05	0.000120947	6.84304e-05
1400	2.67638e-05	0.000194772	0.000110768
1401	2.74871e-05	0.000194772	0.00011113
1402	2.74871e-05	0.000194772	0.00011113
1403	2.74871e-05	0.000193202	0.000110344
1404	2.74871e-05	0.000193202	0.000110344
1405	2.38704e-05	0.000158645	9.12578e-05
1406	4.55707e-05	0.00021048	0.000128025
1407	5.06342e-05	0.000229329	0.000139981
1408	5.49742e-05	0.00023247	0.000143722
1409	6.43777e-05	0.000259173	0.000161775
1410	6.51011e-05	0.000260743	0.000162922
1411	6.51011e-05	0.000265456	0.000165278
1412	6.58244e-05	0.000270168	0.000167996
1413	6.58244e-05	0.000270168	0.000167996
1414	6.58244e-05	0.000268597	0.000167211
1415	6.65477e-05	0.000267026	0.000166787
1416	6.51011e-05	0.000262314	0.000163708
1417	7.88446e-05	0.000276451	0.000177648
1418	7.9568e-05	0.000276451	0.000178009
1419	7.9568e-05	0.000276451	0.000178009
1420	7.9568e-05	0.000276451	0.000178009
1421	7.73979e-05	0.000270168	0.000173783
1422	8.82481e-05	0.000271739	0.000179993
1423	8.82481e-05	0.000265456	0.000176852
1424	8.82481e-05	0.000260743	0.000174496
1425	8.82481e-05	0.00025289	0.000170569
1426	8.68014e-05	0.000251319	0.00016906
1427	6.65477e-05	0.000201055	0.000133801
1428	6.14843e-05	0.000174353	0.000117918
1429	4.34007e-05	0.000109952	7.66764e-05
1430	4.48474e-05	0.000111523	7.81851e-05
1431	4.48474e-05	0.000111523	7.81851e-05
1432	4.48474e-05	0.000111523	7.81851e-05
1433	4.26774e-05	0.000106811	7.4744e-05
1434	3.76139e-05	7.69665e-05	5.72902e-05
1435	3.83373e-05	7.69665e-05	5.76519e-05
1436	2.89338e-05	4.86931e-05	3.88134e-05
1437	3.03805e-05	4.24101e-05	3.63953e-05
1438	3.03805e-05	4.24101e-05	3.63953e-05
1439	3.03805e-05	4.24101e-05	3.63953e-05
1440	3.03805e-05	4.24101e-05	3.63953e-05
1441	1.95303e-05	2.98441e-05	2.46872e-05
1442	7.23345e-06	3.14149e-06	5.18747e-06
1443	2.02537e-05	1.41367e-05	1.71952e-05
1444	2.17004e-05	1.72782e-05	1.94893e-05
1445	2.89338e-05	1.72782e-05	2.3106e-05
1446	3.11038e-05	1.88489e-05	2.49764e-05
1447	3.39972e-05	2.04197e-05	2.72084e-05
1448	8.89714e-05	7.53957e-05	8.21836e-05
1449	8.96948e-05	8.01079e-05	8.49014e-05
1450	8.96948e-05	8.01079e-05	8.49014e-05
1451	8.96948e-05	8.01079e-05	8.49014e-05
1452	8.96948e-05	8.01079e-05	8.49014e-05
1453	8.96948e-05	8.16787e-05	8.56867e-05
1454	0.000149732	0.000133513	0.000141623
1455	0.000151902	0.000138225	0.000145064
1456	0.000157689	0.000146079	0.000151884
1457	0.000162753	0.000157074	0.000159914
1458	0.000163476	0.000157074	0.000160275
1459	0.000163476	0.000157074	0.000160275
1460	0.000165646	0.000157074	0.00016136
1461	0.000165646	0.000157074	0.00016136
1462	0.000165646	0.000157074	0.00016136
1463	0.000173603	0.000161787	0.000167695
1464	0.000173603	0.000161787	0.000167695
1465	0.000172879	0.000161787	0.000167333
1466	0.000173603	0.000161787	0.000167695
1467	0.000171433	0.000161787	0.00016661
1468	0.000141052	0.000141367	0.00014121
1469	0.000139606	0.000142938	0.000141272
1470	0.000138882	0.00014765	0.000143266
1471	0.000122245	0.00012566	0.000123952
1472	0.000122969	0.00012723	0.000125099
1473	0.000104885	0.000120947	0.000112916
1474	8.68014e-05	9.58154e-05	9.13084e-05
1475	9.47582e-05	0.000128801	0.00011178
1476	9.54816e-05	0.000128801	0.000112141
1477	9.18648e-05	0.000124089	0.000107977
1478	9.18648e-05	0.00012566	0.000108762
1479	9.33115e-05	0.000124089	0.0001087
1480	9.18648e-05	0.000124089	0.000107977
1481	9.04181e-05	0.000124089	0.000107253
1482	8.89714e-05	0.000124089	0.00010653
1483	5.93143e-05	8.48202e-05	7.20672e-05
1484	6.14843e-05	0.000108381	8.49328e-05
1485	6.14843e-05	0.000109952	8.57182e-05
1486	5.49742e-05	0.000102098	7.85363e-05
1487	5.56976e-05	0.000103669	7.96833e-05
1488	5.49742e-05	0.000102098	7.85363e-05
1489	3.90606e-05	9.11031e-05	6.50819e-05
1490	4.48474e-05	0.000113094	7.89705e-05
1491	4.41241e-05	0.000113094	7.86088e-05
1492	2.60404e-05	0.000100528	6.3284e-05
1493	4.12307e-05	0.000113094	7.71621e-05
1494	4.34007e-05	0.000111523	7.74618e-05
1495	4.62941e-05	0.000114664	8.04792e-05
1496	4.48474e-05	0.000116235	8.05412e-05
1497	4.1954e-05	0.000111523	7.67384e-05
1498	4.70174e-05	0.000138225	9.26214e-05
1499	4.70174e-05	0.000138225	9.26214e-05
1500	4.70174e-05	0.000138225	9.26214e-05
1501	4.70174e-05	0.000136655	9.18361e-05
1502	4.70174e-05	0.000136655	9.18361e-05
1503	4.70174e-05	0.000136655	9.18361e-05
1504	4.70174e-05	0.000136655	9.18361e-05
1505	5.06342e-05	0.000136655	9.36444e-05
1506	5.06342e-05	0.000136655	9.36444e-05
1507	5.13575e-05	0.000136655	9.40061e-05
1508	4.99108e-05	0.000135084	9.24974e-05
1509	4.99108e-05	0.000135084	9.24974e-05
1510	4.99108e-05	0.000135084	9.24974e-05
1511	4.99108e-05	0.000135084	9.24974e-05
1512	4.70174e-05	0.000130372	8.86946e-05
1513	4.41241e-05	0.000124089	8.41064e-05
1514	4.05073e-05	0.000114664	7.75858e-05
1515	4.05073e-05	0.000114664	7.75858e-05
1516	4.05073e-05	0.000114664	7.75858e-05
1517	2.96571e-05	9.58154e-05	6.27363e-05
1518	1.30202e-05	6.44005e-05	3.87104e-05
1519	1.30202e-05	6.59712e-05	3.94957e-05
1520	1.15735e-05	5.34053e-05	3.24894e-05
1521	1.37436e-05	6.44005e-05	3.9072e-05
1522	1.30202e-05	7.06835e-05	4.18518e-05
1523	1.22969e-05	7.06835e-05	4.14902e-05
1524	1.22969e-05	6.59712e-05	3.91341e-05
1525	3.61673e-06	4.71223e-05	2.53695e-05
1526	1.01268e-05	8.16787e-05	4.59028e-05
1527	1.01268e-05	8.16787e-05	4.59028e-05
1528	9.40349e-06	8.16787e-05	4.55411e-05
1529	9.40349e-06	8.16787e-05	4.55411e-05
1530	9.40349e-06	8.16787e-05	4.55411e-05
1531	9.40349e-06	8.16787e-05	4.55411e-05
1532	9.40349e-06	8.16787e-05	4.55411e-05
1533	9.40349e-06	8.16787e-05	4.55411e-05
1534	9.40349e-06	8.48202e-05	4.71118e-05
1535	9.40349e-06	8.48202e-05	4.71118e-05
1536	9.40349e-06	8.48202e-05	4.71118e-05
1537	9.40349e-06	8.48202e-05	4.71118e-05
1538	9.40349e-06	8.48202e-05	4.71118e-05
1539	9.40349e-06	8.48202e-05	4.71118e-05
1540	9.40349e-06	8.16787e-05	4.55411e-05
1541	9.40349e-06	8.16787e-05	4.55411e-05
1542	9.40349e-06	8.01079e-05	4.47557e-05
1543	6.51011e-06	4.24101e-05	2.44601e-05
1544	6.51011e-06	5.02638e-05	2.8387e-05
1545	6.51011e-06	5.02638e-05	2.8387e-05
1546	6.51011e-06	4.71223e-05	2.68162e-05
1547	8.68014e-06	4.71223e-05	2.79012e-05
1548	8.68014e-06	4.71223e-05	2.79012e-05
1549	7.9568e-06	4.71223e-05	2.75396e-05
1550	7.23345e-06	4.24101e-05	2.48218e-05
1551	3.61673e-06	3.45564e-05	1.90865e-05
1552	3.61673e-06	3.45564e-05	1.90865e-05
1553	3.61673e-06	3.45564e-05	1.90865e-05
1554	3.61673e-06	3.29856e-05	1.83012e-05
1555	2.17004e-06	1.41367e-05	8.15337e-06
1556	2.89338e-06	1.41367e-05	8.51504e-06
1557	2.89338e-06	1.41367e-05	8.51504e-06
1558	2.89338e-06	7.85372e-06	5.37355e-06
1559	2.89338e-06	7.85372e-06	5.37355e-06
1560	2.89338e-06	7.85372e-06	5.37355e-06
1561	2.89338e-06	7.85372e-06	5.37355e-06
1562	2.89338e-06	7.85372e-06	5.37355e-06
1563	2.89338e-06	7.85372e-06	5.37355e-06
1564	2.89338e-06	7.85372e-06	5.37355e-06
1565	2.89338e-06	7.85372e-06	5.37355e-06
1566	2.89338e-06	7.85372e-06	5.37355e-06
1567	2.89338e-06	7.85372e-06	5.37355e-06
1568	2.89338e-06	3.14149e-06	3.01743e-06
1569	2.89338e-06	3.14149e-06	3.01743e-06
1570	2.89338e-06	3.14149e-06	3.01743e-06
1571	2.89338e-06	1.57074e-06	2.23206e-06
1572	2.89338e-06	4.71223e-06	3.80281e-06
1573	7.23345e-07	4.71223e-06	2.71779e-06
1574	3.61673e-06	1.41367e-05	8.87671e-06
1575	3.61673e-06	1.41367e-05	8.87671e-06
1576	3.61673e-06	1.57074e-05	9.66208e-06
1577	3.61673e-06	1.72782e-05	1.04475e-05
1578	4.34007e-06	1.72782e-05	1.08091e-05
1579	3.61673e-06	1.72782e-05	1.04475e-05
1580	5.06342e-06	1.72782e-05	1.11708e-05
1581	5.06342e-06	1.72782e-05	1.11708e-05
1582	1.44669e-05	2.67026e-05	2.05848e-05
1583	1.51902e-05	2.82734e-05	2.17318e-05
1584	1.59136e-05	3.14149e-05	2.36642e-05
1585	1.59136e-05	3.14149e-05	2.36642e-05
1586	1.59136e-05	3.14149e-05	2.36642e-05
1587	1.59136e-05	3.14149e-05	2.36642e-05
1588	1.59136e-05	3.14149e-05	2.36642e-05
1589	1.59136e-05	3.14149e-05	2.36642e-05
1590	4.41241e-05	4.39808e-05	4.40524e-05
1591	5.93143e-05	4.71223e-05	5.32183e-05
1592	6.22077e-05	4.86931e-05	5.54504e-05
1593	6.22077e-05	4.86931e-05	5.54504e-05
1594	6.51011e-05	4.71223e-05	5.61117e-05
1595	6.43777e-05	4.55516e-05	5.49646e-05
1596	7.23345e-05	5.18346e-05	6.20845e-05
1597	7.37812e-05	5.18346e-05	6.28079e-05
1598	7.37812e-05	5.18346e-05	6.28079e-05
1599	7.37812e-05	5.18346e-05	6.28079e-05
1600	7.37812e-05	5.18346e-05	6.28079e-05
1601	7.37812e-05	5.18346e-05	6.28079e-05
1602	7.52279e-05	4.86931e-05	6.19605e-05
1603	0.000100545	5.4976e-05	7.77605e-05
1604	0.000101268	5.4976e-05	7.81222e-05
1605	0.000101268	5.4976e-05	7.81222e-05
1606	0.000101268	5.4976e-05	7.81222e-05
1607	0.000101268	5.4976e-05	7.81222e-05
1608	9.90983e-05	5.34053e-05	7.62518e-05
1609	9.90983e-05	5.34053e-05	7.62518e-05
1610	9.83749e-05	5.34053e-05	7.58901e-05
1611	9.76516e-05	5.34053e-05	7.55284e-05
1612	8.24613e-05	4.55516e-05	6.40065e-05
1613	7.23345e-05	3.29856e-05	5.26601e-05
1614	7.52279e-05	3.29856e-05	5.41068e-05
1615	7.37812e-05	2.67026e-05	5.02419e-05
1616	5.13575e-05	1.88489e-05	3.51032e-05
1617	0.000110672	4.24101e-05	7.65409e-05
1618	0.000112118	4.24101e-05	7.72643e-05
1619	0.000112842	4.24101e-05	7.7626e-05
1620	0.000112842	4.24101e-05	7.7626e-05
1621	0.000112118	4.24101e-05	7.72643e-05
1622	0.000112118	4.24101e-05	7.72643e-05
1623	0.000112118	4.24101e-05	7.72643e-05
1624	0.000112118	4.24101e-05	7.72643e-05
1625	0.000107055	4.24101e-05	7.47326e-05
1626	0.000101992	4.24101e-05	7.22009e-05
1627	9.54816e-05	4.24101e-05	6.89458e-05
1628	8.24613e-05	3.29856e-05	5.77235e-05
1629	8.46314e-05	3.61271e-05	6.03792e-05
1630	8.46314e-05	3.61271e-05	6.03792e-05
1631	8.31847e-05	3.45564e-05	5.88705e-05
1632	8.31847e-05	3.45564e-05	5.88705e-05
1633	8.31847e-05	3.45564e-05	5.88705e-05
1634	8.31847e-05	3.29856e-05	5.80852e-05
1635	8.31847e-05	3.45564e-05	5.88705e-05
1636	8.31847e-05	3.45564e-05	5.88705e-05
1637	8.1738e-05	3.45564e-05	5.81472e-05
1638	7.9568e-05	3.29856e-05	5.62768e-05
1639	7.9568e-05	3.29856e-05	5.62768e-05
1640	7.37812e-05	3.14149e-05	5.2598e-05
1641	7.37812e-05	3.14149e-05	5.2598e-05
1642	7.01645e-05	3.14149e-05	5.07897e-05
1643	6.79944e-05	3.14149e-05	4.97047e-05
1644	3.83373e-05	2.04197e-05	2.93785e-05
1645	3.90606e-05	2.04197e-05	2.97402e-05
1646	3.90606e-05	2.04197e-05	2.97402e-05
1647	3.90606e-05	2.04197e-05	2.97402e-05
1648	3.11038e-05	1.88489e-05	2.49764e-05
1649	6.51011e-06	1.09952e-05	8.75266e-06
1650	2.17004e-05	1.88489e-05	2.02746e-05
1651	2.53171e-05	2.67026e-05	2.60099e-05
1652	2.74871e-05	2.67026e-05	2.70949e-05
1653	2.89338e-05	3.14149e-05	3.01743e-05
1654	2.89338e-05	2.98441e-05	2.9389e-05
1655	2.89338e-05	2.82734e-05	2.86036e-05
1656	2.82105e-05	2.82734e-05	2.82419e-05
1657	2.74871e-05	2.51319e-05	2.63095e-05
1658	2.96571e-05	2.67026e-05	2.81799e-05
1659	2.96571e-05	2.67026e-05	2.81799e-05
1660	3.03805e-05	2.67026e-05	2.85416e-05
1661	3.03805e-05	2.67026e-05	2.85416e-05
1662	3.03805e-05	2.67026e-05	2.85416e-05
1663	3.03805e-05	2.67026e-05	2.85416e-05
1664	3.03805e-05	2.67026e-05	2.85416e-05
1665	3.03805e-05	2.67026e-05	2.85416e-05
1666	3.03805e-05	2.51319e-05	2.77562e-05
1667	3.03805e-05	2.51319e-05	2.77562e-05
1668	3.03805e-05	2.51319e-05	2.77562e-05
1669	3.03805e-05	2.51319e-05	2.77562e-05
1670	3.03805e-05	2.51319e-05	2.77562e-05
1671	3.03805e-05	2.51319e-05	2.77562e-05
1672	3.03805e-05	2.51319e-05	2.77562e-05
1673	3.03805e-05	2.51319e-05	2.77562e-05
1674	3.03805e-05	2.51319e-05	2.77562e-05
1675	3.03805e-05	2.51319e-05	2.77562e-05
1676	3.03805e-05	2.51319e-05	2.77562e-05
1677	2.89338e-05	2.51319e-05	2.70329e-05
1678	2.74871e-05	2.35612e-05	2.55241e-05
1679	7.23345e-07	1.57074e-06	1.14704e-06
1680	0.000130925	2.67026e-05	7.88141e-05
1681	0.000133095	2.67026e-05	7.98991e-05
1682	0.000133095	2.67026e-05	7.98991e-05
1683	0.000133095	2.67026e-05	7.98991e-05
1684	0.000133095	2.67026e-05	7.98991e-05
1685	0.000133095	2.67026e-05	7.98991e-05
1686	0.000133095	2.67026e-05	7.98991e-05
1687	0.000133095	2.67026e-05	7.98991e-05
1688	0.000133095	2.67026e-05	7.98991e-05
1689	0.000133095	2.67026e-05	7.98991e-05
1690	0.000133095	2.67026e-05	7.98991e-05
1691	0.000133095	2.67026e-05	7.98991e-05
1692	0.000133095	2.67026e-05	7.98991e-05
1693	0.000133095	2.67026e-05	7.98991e-05
1694	0.000133095	2.67026e-05	7.98991e-05
1695	0.000133095	2.67026e-05	7.98991e-05
1696	0.000133819	2.67026e-05	8.02607e-05
1697	0.000133819	2.67026e-05	8.02607e-05
1698	0.000133819	2.67026e-05	8.02607e-05
1699	0.000127309	2.67026e-05	7.70057e-05
1700	0.000113565	2.51319e-05	6.93485e-05
1701	0.000103438	2.67026e-05	6.50705e-05
1702	8.89714e-05	2.67026e-05	5.7837e-05
1703	5.93143e-05	2.67026e-05	4.30085e-05
1704	2.67638e-05	1.2566e-05	1.96649e-05
1705	2.67638e-05	1.2566e-05	1.96649e-05
1706	2.53171e-05	1.2566e-05	1.89415e-05
1707	2.53171e-05	1.2566e-05	1.89415e-05
1708	2.53171e-05	1.09952e-05	1.81561e-05
1709	1.73603e-05	9.42446e-06	1.33924e-05
1710	1.80836e-05	9.42446e-06	1.3754e-05
1711	1.80836e-05	9.42446e-06	1.3754e-05
1712	1.80836e-05	9.42446e-06	1.3754e-05
1713	1.37436e-05	6.28298e-06	1.00133e-05
1714	9.40349e-06	3.14149e-06	6.27249e-06
1715	1.01268e-05	3.14149e-06	6.63416e-06
1716	9.40349e-06	3.14149e-06	6.27249e-06
1717	9.40349e-06	3.14149e-06	6.27249e-06
1718	8.68014e-06	3.14149e-06	5.91081e-06
1719	7.9568e-06	3.14149e-06	5.54914e-06
1720	7.23345e-06	3.14149e-06	5.18747e-06
1721	8.68014e-06	3.14149e-06	5.91081e-06
1722	8.68014e-06	3.14149e-06	5.91081e-06
1723	3.61673e-06	3.14149e-06	3.37911e-06
1724	5.06342e-06	3.14149e-06	4.10245e-06
1725	5.06342e-06	3.14149e-06	4.10245e-06
1726	5.06342e-06	3.14149e-06	4.10245e-06
1727	5.06342e-06	1.57074e-06	3.31708e-06
1728	5.06342e-06	1.57074e-06	3.31708e-06
1729	4.34007e-06	1.57074e-06	2.95541e-06
1730	4.34007e-06	1.57074e-06	2.95541e-06
1731	4.34007e-06	1.57074e-06	2.95541e-06
1732	5.06342e-06	1.57074e-06	3.31708e-06
1733	8.68014e-06	3.14149e-06	5.91081e-06
1734	8.68014e-06	3.14149e-06	5.91081e-06
1735	8.68014e-06	3.14149e-06	5.91081e-06
1736	8.68014e-06	3.14149e-06	5.91081e-06
1737	9.40349e-06	3.14149e-06	6.27249e-06
1738	9.40349e-06	3.14149e-06	6.27249e-06
1739	9.40349e-06	3.14149e-06	6.27249e-06
1740	9.40349e-06	3.14149e-06	6.27249e-06
1741	9.40349e-06	3.14149e-06	6.27249e-06
1742	9.40349e-06	3.14149e-06	6.27249e-06
1743	9.40349e-06	3.14149e-06	6.27249e-06
1744	9.40349e-06	3.14149e-06	6.27249e-06
1745	9.40349e-06	3.14149e-06	6.27249e-06
1746	9.40349e-06	3.14149e-06	6.27249e-06
1747	9.40349e-06	3.14149e-06	6.27249e-06
1748	9.40349e-06	3.14149e-06	6.27249e-06
1749	9.40349e-06	3.14149e-06	6.27249e-06
1750	9.40349e-06	3.14149e-06	6.27249e-06
1751	9.40349e-06	3.14149e-06	6.27249e-06
1752	9.40349e-06	3.14149e-06	6.27249e-06
1753	9.40349e-06	3.14149e-06	6.27249e-06
1754	9.40349e-06	3.14149e-06	6.27249e-06
1755	9.40349e-06	3.14149e-06	6.27249e-06
1756	8.68014e-06	3.14149e-06	5.91081e-06
1757	8.68014e-06	3.14149e-06	5.91081e-06
1758	7.9568e-06	3.14149e-06	5.54914e-06
1759	7.9568e-06	1.57074e-06	4.76377e-06
1760	7.9568e-06	1.57074e-06	4.76377e-06
1761	7.9568e-06	1.57074e-06	4.76377e-06
1762	1.44669e-06	1.57074e-06	1.50872e-06
1763	5.06342e-06	4.71223e-06	4.88782e-06
1764	5.78676e-06	4.71223e-06	5.2495e-06
1765	6.51011e-06	4.71223e-06	5.61117e-06
1766	1.15735e-05	9.42446e-06	1.0499e-05
1767	1.22969e-05	1.09952e-05	1.1646e-05
1768	1.22969e-05	1.09952e-05	1.1646e-05
1769	1.15735e-05	1.09952e-05	1.12844e-05
1770	1.15735e-05	1.09952e-05	1.12844e-05
1771	1.15735e-05	1.09952e-05	1.12844e-05
1772	1.15735e-05	1.09952e-05	1.12844e-05
1773	1.22969e-05	1.09952e-05	1.1646e-05
1774	1.22969e-05	1.09952e-05	1.1646e-05
1775	1.22969e-05	1.09952e-05	1.1646e-05
1776	1.22969e-05	1.09952e-05	1.1646e-05
1777	3.18272e-05	2.35612e-05	2.76942e-05
1778	3.18272e-05	2.35612e-05	2.76942e-05
1779	3.18272e-05	2.35612e-05	2.76942e-05
1780	3.18272e-05	2.35612e-05	2.76942e-05
1781	3.18272e-05	2.35612e-05	2.76942e-05
1782	2.96571e-05	2.19904e-05	2.58238e-05
1783	5.71443e-05	4.08393e-05	4.89918e-05
1784	5.8591e-05	4.08393e-05	4.97151e-05
1785	5.8591e-05	4.08393e-05	4.97151e-05
1786	5.8591e-05	4.08393e-05	4.97151e-05
1787	5.8591e-05	4.08393e-05	4.97151e-05
1788	5.78676e-05	4.08393e-05	4.93535e-05
1789	5.71443e-05	3.92686e-05	4.82064e-05
1790	5.71443e-05	3.92686e-05	4.82064e-05
1791	5.71443e-05	3.92686e-05	4.82064e-05
1792	5.42509e-05	3.92686e-05	4.67597e-05
1793	5.64209e-05	4.71223e-05	5.17716e-05
1794	5.64209e-05	4.71223e-05	5.17716e-05
1795	5.64209e-05	4.71223e-05	5.17716e-05
1796	5.20808e-05	4.39808e-05	4.80308e-05
1797	5.64209e-05	5.02638e-05	5.33424e-05
1798	5.71443e-05	5.02638e-05	5.3704e-05
1799	5.71443e-05	5.02638e-05	5.3704e-05
1800	5.71443e-05	5.02638e-05	5.3704e-05
1801	5.71443e-05	5.02638e-05	5.3704e-05
1802	5.78676e-05	5.02638e-05	5.40657e-05
1803	5.06342e-05	4.24101e-05	4.65221e-05
1804	3.83373e-05	3.76979e-05	3.80176e-05
1805	3.9784e-05	3.61271e-05	3.79555e-05
1806	2.02537e-05	2.35612e-05	2.19074e-05
1807	4.1954e-05	2.98441e-05	3.58991e-05
1808	3.90606e-05	2.98441e-05	3.44524e-05
1809	4.05073e-05	2.98441e-05	3.51757e-05
1810	4.1954e-05	2.98441e-05	3.58991e-05
1811	4.48474e-05	2.67026e-05	3.5775e-05
1812	4.48474e-05	2.67026e-05	3.5775e-05
1813	4.34007e-05	1.88489e-05	3.11248e-05
1814	6.87178e-05	2.19904e-05	4.53541e-05
1815	7.01645e-05	2.19904e-05	4.60774e-05
1816	7.01645e-05	2.19904e-05	4.60774e-05
1817	7.01645e-05	2.19904e-05	4.60774e-05
1818	7.08878e-05	2.19904e-05	4.64391e-05
1819	6.87178e-05	2.19904e-05	4.53541e-05
1820	6.87178e-05	2.19904e-05	4.53541e-05
1821	6.87178e-05	2.19904e-05	4.53541e-05
1822	6.87178e-05	2.19904e-05	4.53541e-05
1823	6.72711e-05	2.35612e-05	4.54161e-05
1824	7.01645e-05	4.71223e-05	5.86434e-05
1825	7.01645e-05	4.71223e-05	5.86434e-05
1826	7.01645e-05	4.71223e-05	5.86434e-05
1827	5.93143e-05	4.39808e-05	5.16476e-05
1828	5.20808e-05	4.08393e-05	4.64601e-05
1829	6.36544e-05	5.81175e-05	6.08859e-05
1830	6.22077e-05	5.81175e-05	6.01626e-05
1831	6.58244e-05	6.1259e-05	6.35417e-05
1832	7.08878e-05	6.7542e-05	6.92149e-05
1833	6.94411e-05	6.7542e-05	6.84916e-05
1834	6.58244e-05	6.91127e-05	6.74686e-05
1835	6.22077e-05	6.7542e-05	6.48748e-05
1836	6.22077e-05	6.7542e-05	6.48748e-05
1837	6.14843e-05	6.7542e-05	6.45132e-05
1838	5.49742e-05	6.1259e-05	5.81166e-05
1839	5.64209e-05	6.1259e-05	5.884e-05
1840	5.56976e-05	6.1259e-05	5.84783e-05
1841	4.99108e-05	6.1259e-05	5.55849e-05
1842	4.99108e-05	5.96883e-05	5.47995e-05
1843	4.99108e-05	5.96883e-05	5.47995e-05
1844	4.55707e-05	5.81175e-05	5.18441e-05
1845	4.48474e-05	5.02638e-05	4.75556e-05
1846	4.34007e-05	4.71223e-05	4.52615e-05
1847	4.34007e-05	4.71223e-05	4.52615e-05
1848	4.05073e-05	3.92686e-05	3.9888e-05
1849	3.76139e-05	3.61271e-05	3.68705e-05
1850	3.76139e-05	3.61271e-05	3.68705e-05
1851	2.45937e-05	3.29856e-05	2.87897e-05
1852	1.08502e-05	1.88489e-05	1.48496e-05
1853	1.08502e-05	1.57074e-05	1.32788e-05
1854	2.89338e-06	4.71223e-06	3.80281e-06
1855	5.06342e-06	4.71223e-06	4.88782e-06
1856	5.78676e-06	7.85372e-06	6.82024e-06
1857	5.06342e-06	9.42446e-06	7.24394e-06
1858	1.08502e-05	3.29856e-05	2.19179e-05
1859	9.40349e-06	3.45564e-05	2.19799e-05
1860	9.40349e-06	3.61271e-05	2.27653e-05
1861	9.40349e-06	3.61271e-05	2.27653e-05
1862	9.40349e-06	3.61271e-05	2.27653e-05
1863	9.40349e-06	3.61271e-05	2.27653e-05
1864	1.30202e-05	5.18346e-05	3.24274e-05
1865	1.30202e-05	5.18346e-05	3.24274e-05
1866	1.30202e-05	5.18346e-05	3.24274e-05
1867	1.30202e-05	5.18346e-05	3.24274e-05
1868	1.30202e-05	5.18346e-05	3.24274e-05
1869	1.30202e-05	5.18346e-05	3.24274e-05
1870	1.30202e-05	5.02638e-05	3.1642e-05
1871	1.30202e-05	5.02638e-05	3.1642e-05
1872	1.30202e-05	5.02638e-05	3.1642e-05
1873	1.30202e-05	5.02638e-05	3.1642e-05
1874	1.30202e-05	4.86931e-05	3.08566e-05
1875	1.01268e-05	4.55516e-05	2.78392e-05
1876	1.15735e-05	5.4976e-05	3.32748e-05
1877	1.15735e-05	5.65468e-05	3.40602e-05
1878	1.15735e-05	5.65468e-05	3.40602e-05
1879	1.15735e-05	5.65468e-05	3.40602e-05
1880	1.15735e-05	5.65468e-05	3.40602e-05
1881	1.08502e-05	5.18346e-05	3.13424e-05
1882	1.08502e-05	5.18346e-05	3.13424e-05
1883	1.08502e-05	5.18346e-05	3.13424e-05
1884	7.23345e-06	4.86931e-05	2.79633e-05
1885	7.23345e-06	3.92686e-05	2.3251e-05
1886	5.78676e-06	3.61271e-05	2.09569e-05
1887	1.44669e-06	2.35612e-05	1.25039e-05
1888	1.44669e-06	2.51319e-05	1.32893e-05
1889	1.44669e-06	2.51319e-05	1.32893e-05
1890	1.44669e-06	2.04197e-05	1.09332e-05
1891	2.17004e-06	2.04197e-05	1.12949e-05
1892	2.17004e-06	2.04197e-05	1.12949e-05
1893	2.17004e-06	1.88489e-05	1.05095e-05
1894	2.17004e-06	2.35612e-05	1.28656e-05
1895	2.17004e-06	2.35612e-05	1.28656e-05
1896	1.44669e-06	1.41367e-05	7.79169e-06
1897	1.44669e-06	1.72782e-05	9.36244e-06
1898	1.44669e-06	1.72782e-05	9.36244e-06
1899	1.44669e-06	1.72782e-05	9.36244e-06
1900	1.44669e-06	1.72782e-05	9.36244e-06
1901	1.44669e-06	1.72782e-05	9.36244e-06
1902	1.44669e-06	1.57074e-05	8.57706e-06
1903	2.17004e-06	1.72782e-05	9.72411e-06
1904	2.17004e-06	1.72782e-05	9.72411e-06
1905	2.17004e-06	1.72782e-05	9.72411e-06
1906	1.44669e-06	1.41367e-05	7.79169e-06
1907	2.17004e-06	1.41367e-05	8.15337e-06
1908	2.17004e-06	1.41367e-05	8.15337e-06
1909	2.17004e-06	1.2566e-05	7.36799e-06
1910	2.89338e-06	1.88489e-05	1.08712e-05
1911	2.89338e-06	1.72782e-05	1.00858e-05
1912	1.59136e-05	2.51319e-05	2.05227e-05
1913	1.59136e-05	2.51319e-05	2.05227e-05
1914	1.73603e-05	2.35612e-05	2.04607e-05
1915	3.76139e-05	4.08393e-05	3.92266e-05
1916	3.83373e-05	4.08393e-05	3.95883e-05
1917	3.9784e-05	4.08393e-05	4.03117e-05
1918	9.90983e-05	9.42446e-05	9.66715e-05
1919	0.000100545	9.58154e-05	9.81802e-05
1920	0.000102715	9.42446e-05	9.84798e-05
1921	0.000104162	9.42446e-05	9.92032e-05
1922	0.000105608	9.42446e-05	9.99265e-05
1923	0.000105608	9.58154e-05	0.000100712
1924	0.000105608	9.58154e-05	0.000100712
1925	0.000106332	9.58154e-05	0.000101074
1926	0.000106332	9.58154e-05	0.000101074
1927	0.000131649	0.000113094	0.000122371
1928	0.000137436	0.000116235	0.000126835
1929	0.000138159	0.000116235	0.000127197
1930	0.000138159	0.000116235	0.000127197
1931	0.000138159	0.000116235	0.000127197
1932	0.000138159	0.000116235	0.000127197
1933	0.000138159	0.000116235	0.000127197
1934	0.000136712	0.000114664	0.000125688
1935	0.000133819	0.000111523	0.000122671
1936	0.000135989	0.000111523	0.000123756
1937	0.000135989	0.000113094	0.000124541
1938	0.000135989	0.000111523	0.000123756
1939	0.000123692	0.000103669	0.000113681
1940	0.000123692	0.000103669	0.000113681
1941	0.000120799	0.000102098	0.000111448
1942	0.000120075	0.000102098	0.000111087
1943	9.83749e-05	9.26739e-05	9.55244e-05
1944	9.76516e-05	9.26739e-05	9.51627e-05
1945	9.69282e-05	9.26739e-05	9.48011e-05
1946	9.40349e-05	9.26739e-05	9.33544e-05
1947	9.40349e-05	9.26739e-05	9.33544e-05
1948	9.33115e-05	9.11031e-05	9.22073e-05
1949	5.13575e-05	6.28298e-05	5.70936e-05
1950	2.38704e-05	2.19904e-05	2.29304e-05
1951	3.83373e-05	4.08393e-05	3.95883e-05
1952	3.83373e-05	4.08393e-05	3.95883e-05
1953	3.76139e-05	4.08393e-05	3.92266e-05
1954	3.76139e-05	4.08393e-05	3.92266e-05
1955	3.68906e-05	3.76979e-05	3.72942e-05
1956	2.60404e-05	2.67026e-05	2.63715e-05
1957	3.32739e-05	4.39808e-05	3.86274e-05
1958	3.47206e-05	4.55516e-05	4.01361e-05
1959	2.74871e-05	4.39808e-05	3.5734e-05
1960	3.03805e-05	4.71223e-05	3.87514e-05
1961	3.03805e-05	4.71223e-05	3.87514e-05
1962	3.03805e-05	4.71223e-05	3.87514e-05
1963	3.03805e-05	4.71223e-05	3.87514e-05
1964	3.11038e-05	4.71223e-05	3.91131e-05
1965	3.11038e-05	4.71223e-05	3.91131e-05
1966	3.11038e-05	4.71223e-05	3.91131e-05
1967	3.11038e-05	4.71223e-05	3.91131e-05
1968	3.11038e-05	4.55516e-05	3.83277e-05
1969	3.18272e-05	4.39808e-05	3.7904e-05
1970	3.18272e-05	4.39808e-05	3.7904e-05
1971	3.18272e-05	4.39808e-05	3.7904e-05
1972	3.18272e-05	4.39808e-05	3.7904e-05
1973	3.18272e-05	4.39808e-05	3.7904e-05
1974	3.03805e-05	4.39808e-05	3.71807e-05
1975	2.82105e-05	4.39808e-05	3.60956e-05
1976	2.53171e-05	3.92686e-05	3.22928e-05
1977	2.53171e-05	3.76979e-05	3.15075e-05
1978	1.01268e-05	1.72782e-05	1.37025e-05
1979	8.68014e-06	2.19904e-05	1.53353e-05
1980	7.9568e-06	2.19904e-05	1.49736e-05
1981	6.51011e-06	1.72782e-05	1.18941e-05
1982	9.40349e-06	2.04197e-05	1.49116e-05
1983	9.40349e-06	1.88489e-05	1.41262e-05
1984	9.40349e-06	1.88489e-05	1.41262e-05
1985	9.40349e-06	1.88489e-05	1.41262e-05
1986	7.9568e-06	1.41367e-05	1.10467e-05
1987	8.68014e-06	1.57074e-05	1.21938e-05
1988	8.68014e-06	1.57074e-05	1.21938e-05
1989	8.68014e-06	1.57074e-05	1.21938e-05
1990	8.68014e-06	1.57074e-05	1.21938e-05
1991	6.51011e-06	1.2566e-05	9.53803e-06
1992	7.23345e-06	1.41367e-05	1.06851e-05
1993	7.23345e-06	1.41367e-05	1.06851e-05
1994	5.06342e-06	1.2566e-05	8.81468e-06
1995	7.9568e-06	1.41367e-05	1.10467e-05
1996	7.23345e-06	1.41367e-05	1.06851e-05
1997	8.68014e-06	1.72782e-05	1.29792e-05
1998	8.68014e-06	1.72782e-05	1.29792e-05
1999	8.68014e-06	1.72782e-05	1.29792e-05
[truncated: 7,090 more rows]

## Sheet: NC
bp	CLIP29_density	CLIP43_density	CLIP50_density	CLIP52_density	CLIP54BC4_density	CLIP54BC8_density	average
1	1.36894e-05	1.02158e-05	6.11722e-06	0	0	1.80918e-05	8.01905e-06
2	2.9042e-05	1.99032e-05	1.5454e-05	2.92555e-06	5.63376e-06	3.13128e-05	1.73786e-05
3	3.30081e-05	2.41305e-05	2.06054e-05	2.92555e-06	5.63376e-06	3.27045e-05	1.98346e-05
4	4.68254e-05	3.20565e-05	2.83324e-05	5.85109e-06	9.85907e-06	5.98422e-05	3.04611e-05
5	5.04077e-05	3.29372e-05	3.0908e-05	5.85109e-06	1.12675e-05	6.33214e-05	3.24488e-05
6	5.32224e-05	3.46986e-05	3.31618e-05	6.58248e-06	1.40844e-05	6.81923e-05	3.49903e-05
7	5.55252e-05	3.61077e-05	3.38057e-05	6.58248e-06	1.54928e-05	7.02798e-05	3.6299e-05
8	6.44809e-05	4.13917e-05	3.73472e-05	6.58248e-06	1.69013e-05	8.07174e-05	4.12368e-05
9	7.4716e-05	5.03746e-05	4.12107e-05	7.31387e-06	2.39435e-05	9.74176e-05	4.91627e-05
10	8.81495e-05	5.90052e-05	4.53962e-05	7.31387e-06	2.95772e-05	0.000134993	6.07392e-05
11	9.16039e-05	6.07665e-05	4.79719e-05	7.31387e-06	2.95772e-05	0.000136385	6.22697e-05
12	9.21156e-05	6.09427e-05	4.92597e-05	7.31387e-06	2.95772e-05	0.00013708	6.27149e-05
13	9.27553e-05	6.18233e-05	4.95817e-05	7.31387e-06	3.09857e-05	0.000137776	6.33727e-05
14	0.000132032	0.000104624	8.69289e-05	2.99868e-05	0.000190139	0.000304082	0.000141299
15	0.000133312	0.000105505	8.85387e-05	2.99868e-05	0.00019859	0.000308257	0.000144032
16	0.000134719	0.000106385	9.01485e-05	3.14496e-05	0.00019859	0.000313824	0.000145853
17	0.000135998	0.000106914	9.07924e-05	3.14496e-05	0.00019859	0.000315216	0.000146493
18	0.00013779	0.00010709	9.14363e-05	3.14496e-05	0.00019859	0.000317303	0.000147276
19	0.000166064	0.000120476	0.000102383	6.28992e-05	0.0002169	0.000352095	0.000170136
20	0.000166576	0.000121005	0.000103027	6.36306e-05	0.000218308	0.000350703	0.000170542
21	0.000167727	0.000121357	0.000104959	6.4362e-05	0.000218308	0.000353487	0.0001717
22	0.000162993	0.000115016	0.000102705	6.58248e-05	0.000218308	0.000346528	0.000168563
23	0.000222229	0.000165038	0.000124276	0.00011629	0.000326758	0.000464125	0.000236453
24	0.000293746	0.00025381	0.000153252	0.000156517	0.000504221	0.000732024	0.000348928
25	0.000307692	0.000266316	0.000155506	0.000154323	0.000530981	0.000779341	0.000365693
26	0.000312297	0.000267901	0.000159048	0.000154323	0.00053239	0.000788387	0.000369058
27	0.000313705	0.000268253	0.000161301	0.000155054	0.000535207	0.000789083	0.000370434
28	0.000311658	0.000268958	0.000162589	0.000154323	0.00054084	0.000793953	0.000372054
29	0.000316008	0.000273714	0.000164843	0.000154323	0.000545066	0.000798824	0.000375463
30	0.000266879	0.000251521	0.000142628	0.000153591	0.000535207	0.00074107	0.000348483
31	0.000523396	0.00041832	0.000237284	0.000175533	0.000838021	0.0011544	0.000557825
32	0.000560114	0.000430826	0.000293626	0.000176996	0.000859148	0.00119545	0.000586027
33	0.00057777	0.000441042	0.000318417	0.000177727	0.000861965	0.00121354	0.000598411
34	0.000589924	0.000445445	0.000358984	0.000179921	0.000863373	0.00121772	0.000609228
35	0.000592355	0.000445797	0.000360594	0.000179921	0.000863373	0.00121702	0.000609844
36	0.000590563	0.000443508	0.000369287	0.000174801	0.000861965	0.0012045	0.000607437
37	0.000621141	0.000459888	0.000383775	0.00017407	0.00089295	0.00127617	0.000634666
38	0.000661569	0.000499695	0.000399551	0.000190892	0.000950696	0.00147309	0.000695916
39	0.000671804	0.0005122	0.000405668	0.000204788	0.000987316	0.0015559	0.000722946
40	0.000673723	0.000514666	0.0004076	0.000206982	0.000988724	0.00156007	0.000725295
41	0.000670653	0.000513609	0.00040438	0.000207714	0.000980273	0.0015559	0.000722088
42	0.000672188	0.000514842	0.000406312	0.000207714	0.000980273	0.00155938	0.000723451
43	0.0006727	0.000514666	0.0004076	0.000207714	0.000976048	0.0015559	0.000722438
44	0.000661185	0.000503746	0.000400517	0.000201131	0.000946471	0.00151276	0.000704301
45	0.000616663	0.000457775	0.00036317	0.000173339	0.000811261	0.00135619	0.000629733
46	0.000661569	0.000477149	0.000382165	0.000174801	0.000916894	0.00145291	0.000677582
47	0.000674363	0.00048349	0.000387316	0.000174801	0.000980273	0.0014884	0.000698108
48	0.00066771	0.00048032	0.000385385	0.000165293	0.000981682	0.00147588	0.000692711
49	0.000662337	0.000473451	0.000384419	0.000161636	0.000976048	0.00146822	0.000687686
50	0.00069253	0.000483843	0.000399229	0.000163831	0.000992949	0.00149536	0.000704624
51	0.000691763	0.00048261	0.000399229	0.000163099	0.000988724	0.00147448	0.000699985
52	0.000691891	0.000482433	0.000398263	0.000163099	0.000988724	0.0014724	0.000699468
53	0.000691123	0.000481729	0.000397619	0.000163099	0.000987316	0.00146266	0.000697257
54	0.000690355	0.000479615	0.000397619	0.000162368	0.00098309	0.00145222	0.000694211
55	0.000690227	0.000478382	0.000397619	0.000162368	0.00098309	0.00144874	0.000693404
56	0.000656196	0.000421315	0.000386029	0.000138963	0.000905626	0.00128174	0.000631644
57	0.000612185	0.0003609	0.000367033	0.000107514	0.00080281	0.00111404	0.000560747
58	0.000462113	0.000244827	0.000304573	7.31387e-05	0.000492954	0.000618602	0.000366035
59	0.000461602	0.000245004	0.000304573	7.31387e-05	0.000490137	0.000611643	0.000364349
60	0.000399168	0.000195334	0.000271411	4.46146e-05	0.000404222	0.000420287	0.000289173
61	0.000338013	0.000175254	0.000232776	3.51066e-05	0.000376053	0.000387583	0.000257464
62	0.000323428	0.000167504	0.000219898	3.43752e-05	0.000364786	0.000354878	0.000244145
63	0.000307308	0.00015676	0.000211527	3.07182e-05	0.000349293	0.000310345	0.000227658
64	0.000295538	0.000151124	0.000205732	2.77927e-05	0.000342251	0.000296428	0.000219811
65	0.000236174	0.000121533	0.000164521	2.63299e-05	0.000287322	0.000233106	0.000178164
66	0.000241676	0.000133334	0.000172892	2.70613e-05	0.000278871	0.000228236	0.000180345
67	0.000240908	0.000133686	0.000171604	2.77927e-05	0.000278871	0.00022754	0.000180067
68	0.000238605	0.000131749	0.000166775	2.77927e-05	0.000277462	0.000226148	0.000178089
69	0.000160307	9.82833e-05	0.00011333	9.50803e-06	0.000209857	0.000205969	0.000132876
70	0.000152886	9.70503e-05	0.000110754	9.50803e-06	0.000208449	0.000201794	0.000130074
71	0.000139197	9.12379e-05	0.000102383	7.31387e-06	0.000205632	0.000196227	0.000123665
72	9.3395e-05	7.36244e-05	7.53384e-05	3.65693e-06	0.000173238	0.000160043	9.65493e-05
73	0.000102095	8.24311e-05	8.33873e-05	5.11971e-06	0.000164787	0.000158652	9.9412e-05
74	0.000116168	9.37038e-05	9.369e-05	7.31387e-06	0.000163379	0.000171872	0.000107688
75	6.92146e-05	7.11585e-05	6.60016e-05	5.85109e-06	1.69013e-05	5.28838e-05	4.70018e-05
76	0.000182568	0.000253634	0.000179009	7.82584e-05	7.04219e-05	0.00014891	0.000152134
77	0.000183592	0.000254515	0.000177077	7.82584e-05	7.18304e-05	0.000149606	0.00015248
78	0.000183719	0.000254515	0.000175468	7.82584e-05	7.04219e-05	0.000151693	0.000152346
79	0.000183464	0.000254691	0.00017418	7.82584e-05	7.04219e-05	0.000152389	0.000152234
80	0.000179881	0.00025064	0.000175468	7.82584e-05	6.47882e-05	0.000145431	0.000149078
81	0.000179497	0.000255396	0.000177721	7.97211e-05	6.61966e-05	0.00014891	0.00015124
82	0.000178346	0.000255924	0.00017579	8.26467e-05	6.61966e-05	0.000150997	0.00015165
83	0.000181289	0.000267373	0.000179653	8.63036e-05	6.61966e-05	0.000155172	0.000155998
84	0.00017937	0.000264555	0.000180297	8.84978e-05	6.76051e-05	0.000154476	0.0001558
85	0.000196002	0.000301895	0.000226337	0.000133112	0.000132393	0.000183006	0.000195458
86	0.000200351	0.000311759	0.000235996	0.000135307	0.000143661	0.000194139	0.000203535
87	0.000200735	0.000316514	0.000237284	0.000135307	0.000145069	0.00019901	0.000205653
88	0.000217879	0.000340469	0.000256601	0.00014774	0.000160562	0.000213623	0.000222812
89	0.000218519	0.000341173	0.000262396	0.00014774	0.00016197	0.000215015	0.000224469
90	0.000219286	0.000341878	0.000262718	0.000149934	0.00016197	0.00021571	0.00022525
91	0.000215064	0.000338531	0.000264328	0.000149203	0.00016197	0.000212927	0.000223671
92	0.000219286	0.000346105	0.000264328	0.000151397	0.000167604	0.000215015	0.000227289
93	0.000212378	0.000341878	0.000261753	0.000151397	0.000167604	0.000210144	0.000224192
94	0.000199584	0.00033131	0.000251772	0.000149203	0.000167604	0.000201098	0.000216762
95	0.000121286	0.000256981	0.000196717	0.000141158	0.000160562	0.000134297	0.0001685
96	0.000156213	0.000371997	0.000249518	0.00016895	0.000229576	0.000178135	0.000225731
97	0.000230161	0.000391196	0.000273987	0.000170413	0.000280279	0.000231715	0.000262958
98	0.000232592	0.000392076	0.000275597	0.000170413	0.000280279	0.000234498	0.000264243
99	0.000230673	0.000390491	0.000273987	0.000171876	0.000278871	0.000233802	0.000263283
100	0.000220438	0.000373054	0.000264328	0.000166756	0.000274646	0.000228931	0.000254692
101	0.000569198	0.000600972	0.000582424	0.000481252	0.000480278	0.000436292	0.000525069
102	0.000587237	0.00060837	0.000594336	0.000486372	0.000497179	0.000445338	0.000536472
103	0.000623188	0.000625103	0.000658406	0.000503194	0.000509855	0.000454384	0.000562355
104	0.000816375	0.000724619	0.000777531	0.000653128	0.000630981	0.000576156	0.000696465
105	0.000837229	0.000732897	0.000805541	0.000667756	0.000647882	0.000585201	0.000712751
106	0.000980519	0.000791902	0.000847396	0.000740163	0.000699994	0.000686098	0.000791012
107	0.000989731	0.000792607	0.000864138	0.000744552	0.000708445	0.000692361	0.000798639
108	0.00103438	0.000808459	0.000885387	0.000754791	0.000729571	0.000718803	0.000821899
109	0.00103246	0.000807578	0.000885709	0.000755522	0.000729571	0.000715324	0.000821028
110	0.00105178	0.000810749	0.000898587	0.000785509	0.000735205	0.00072089	0.000833787
111	0.0010775	0.00082026	0.000909212	0.000797211	0.000749289	0.000755682	0.000851525
112	0.00110577	0.000825544	0.000914363	0.000797943	0.000753515	0.000761249	0.000859731
113	0.00109784	0.000824311	0.000905348	0.000797943	0.000753515	0.00074942	0.000854729
114	0.00110283	0.00082484	0.000908568	0.000799406	0.000753515	0.000750811	0.000856661
115	0.00109694	0.000822022	0.000902129	0.000800868	0.000752106	0.000750811	0.000854147
116	0.0011137	0.000827834	0.000903095	0.0008016	0.000759149	0.000754986	0.000860061
117	0.00109976	0.000821317	0.000904382	0.000792092	0.000756332	0.000738286	0.000852028
118	0.00108287	0.00081251	0.000897621	0.000790629	0.000754923	0.000722282	0.000843473
119	0.00110168	0.00082255	0.000904704	0.000795017	0.000760557	0.000727849	0.000852059
120	0.00103425	0.000805113	0.000883133	0.000751865	0.000750698	0.000686098	0.000818527
121	0.00105165	0.000814624	0.000887641	0.000755522	0.000761965	0.000690969	0.000827062
122	0.000995104	0.000804056	0.000862528	0.000735775	0.000753515	0.000649219	0.000800033
123	0.00100624	0.000807755	0.000857698	0.000737969	0.000752106	0.000653394	0.000802526
124	0.00100636	0.000807931	0.000863172	0.000737969	0.000752106	0.00065409	0.000803605
125	0.000946744	0.000786442	0.000849971	0.00072773	0.000743656	0.000606772	0.000776886
126	0.000794241	0.00071546	0.000773023	0.000672144	0.000725346	0.000537884	0.000703016
127	0.000725794	0.00070225	0.000748232	0.000635575	0.000714078	0.000507267	0.0006722
128	0.000641483	0.000669136	0.000691568	0.000587303	0.000681684	0.000474563	0.00062429
129	0.000640076	0.000669313	0.000675792	0.000583646	0.000678868	0.00047178	0.000619912
130	0.000625491	0.000664909	0.000648103	0.00056975	0.000670417	0.000462734	0.000606901
131	0.000255109	0.000467286	0.000364135	0.000206251	0.000283096	0.000239369	0.000302541
132	0.00028172	0.000481024	0.000381843	0.000217222	0.000297181	0.000251894	0.000318481
133	0.000287477	0.000483666	0.000383775	0.000217953	0.000297181	0.000250502	0.000320092
134	0.000260994	0.000440513	0.000331618	0.000166756	0.000235209	0.000201794	0.000272814
135	0.000209307	0.000337651	0.00023825	9.80058e-05	0.000152111	0.000159347	0.000199112
136	0.000242315	0.000349099	0.000255957	0.000101663	0.000169013	0.000171872	0.000214987
137	0.00023643	0.000209072	0.000216034	9.06919e-05	0.000160562	0.000138472	0.00017521
138	0.000236814	0.000209248	0.000219898	9.06919e-05	0.000160562	0.000138472	0.000175948
139	0.000236942	0.000208544	0.000218288	9.06919e-05	0.000160562	0.000137776	0.000175467
140	0.000236686	0.000208544	0.000218288	9.06919e-05	0.000160562	0.00013708	0.000175309
141	0.000228114	0.000202731	0.000211205	8.77664e-05	0.00015352	0.000127339	0.000168446
142	0.000210714	0.000192692	0.000198005	8.63036e-05	0.000147886	0.000113422	0.00015817
143	0.000198688	0.000185118	0.000188346	8.55722e-05	0.000132393	0.000102984	0.00014885
144	0.000192035	0.000182123	0.00018416	8.33781e-05	0.000123943	9.95051e-05	0.000144191
145	0.000175148	0.000168033	0.000169028	6.50934e-05	0.000109858	8.62842e-05	0.000128907
146	0.000137022	0.000128578	0.000127174	4.82715e-05	7.60557e-05	5.70589e-05	9.56934e-05
147	0.000143675	0.000134039	0.000132325	5.26598e-05	8.30979e-05	5.98422e-05	0.00010094
148	0.000143035	0.000133158	0.000129749	5.26598e-05	8.30979e-05	6.05381e-05	0.000100373
149	0.000143035	0.000132101	0.000129749	5.26598e-05	8.30979e-05	6.05381e-05	0.000100197
150	0.000127171	0.000119596	0.000115261	4.97343e-05	7.88726e-05	5.70589e-05	9.12822e-05
151	0.000103758	8.84197e-05	9.07924e-05	3.58379e-05	6.05629e-05	4.59254e-05	7.08827e-05
152	8.85333e-05	7.45051e-05	7.69482e-05	4.02263e-05	5.07038e-05	3.61837e-05	6.11834e-05
153	7.98335e-05	6.83403e-05	7.69482e-05	5.11971e-05	4.92954e-05	3.27045e-05	5.97198e-05
154	7.4716e-05	6.86926e-05	7.46945e-05	6.94817e-05	4.78869e-05	3.82712e-05	6.22905e-05
155	5.97472e-05	6.02381e-05	6.21381e-05	7.82584e-05	3.94363e-05	3.4792e-05	5.57683e-05
156	3.42875e-05	3.89258e-05	4.31425e-05	7.387e-05	2.53519e-05	2.08752e-05	3.94088e-05
157	6.80632e-05	7.53857e-05	8.08117e-05	0.000111171	8.16895e-05	4.17504e-05	7.64785e-05
158	6.93426e-05	7.60903e-05	8.14556e-05	0.000111171	8.16895e-05	4.17504e-05	7.69165e-05
159	6.53765e-05	7.38005e-05	7.92019e-05	0.000111171	8.16895e-05	4.03587e-05	7.52663e-05
160	6.26898e-05	7.20392e-05	7.63042e-05	0.000114828	8.59148e-05	3.8967e-05	7.51238e-05
[truncated: 8,284 more rows]

## Sheet: GCN4pII-SP1-NC
bp	CLIP43_density	CLIP50_density	average
[truncated: 8,609 more rows]

[truncated: 2 more sheets: ccHex2-SP1-NC, GCN4pAA-SP1-NC]
