# Supplementary material for: Initiation of HIV-1 Gag lattice assembly is required for recognition of the viral genome packaging signal
Source: eLife journal article supplement (doi:10.7554/elife.83548), 2023-01-23
Supplement: supp [file Fig 5B,C.xlsx]

## Sheet: CANC
bp	CLIP33	CLIP34	CLIP45	CLIP46	CLIP48	Average Read Density
1	1.42452e-05	2.05787e-05	1.62933e-05	8.97093e-06	7.83845e-07	1.21744e-05
2	2.66612e-05	3.08034e-05	3.09938e-05	1.22331e-05	1.56769e-06	2.04518e-05
3	3.03749e-05	3.6304e-05	3.41341e-05	1.38642e-05	1.56769e-06	2.3249e-05
4	4.22366e-05	6.16715e-05	5.49332e-05	1.94247e-05	1.56769e-06	3.59667e-05
5	4.43429e-05	6.45189e-05	5.91203e-05	2.00919e-05	1.56769e-06	3.79283e-05
6	4.71144e-05	6.58778e-05	6.16235e-05	2.09816e-05	1.56769e-06	3.9433e-05
7	4.90544e-05	6.78839e-05	6.32164e-05	2.14264e-05	1.56769e-06	4.06298e-05
8	5.54841e-05	7.06019e-05	6.90874e-05	2.31316e-05	1.56769e-06	4.39745e-05
9	6.20247e-05	7.55201e-05	7.69155e-05	2.58748e-05	2.35153e-06	4.85373e-05
10	7.05607e-05	8.06324e-05	8.69737e-05	2.89887e-05	3.13538e-06	5.40582e-05
11	7.2667e-05	8.25738e-05	8.90673e-05	3.03974e-05	3.13538e-06	5.55682e-05
12	7.31104e-05	8.30268e-05	8.94769e-05	3.08422e-05	3.13538e-06	5.59183e-05
13	7.4219e-05	8.33503e-05	9.00685e-05	3.12129e-05	3.13538e-06	5.63972e-05
14	0.000133749	0.000124443	0.00015283	6.49466e-05	1.56769e-05	9.83291e-05
15	0.000136299	0.000125673	0.000155834	6.57621e-05	1.56769e-05	9.9849e-05
16	0.000138627	0.000127355	0.000158883	6.65035e-05	1.64607e-05	0.000101566
17	0.000139957	0.000128196	0.000160066	6.67259e-05	1.64607e-05	0.000102281
18	0.000140567	0.000128585	0.000161705	6.74673e-05	1.64607e-05	0.000102957
19	0.000157307	0.000149358	0.000185781	8.77075e-05	3.29215e-05	0.000122615
20	0.000158249	0.000149681	0.000186463	8.79299e-05	3.29215e-05	0.000123049
21	0.000160078	0.000151493	0.000188784	8.85972e-05	3.29215e-05	0.000124375
22	0.000158304	0.000142304	0.000183414	8.45195e-05	3.29215e-05	0.000120293
23	0.000190397	0.00017822	0.000237118	9.70491e-05	4.07599e-05	0.000148709
24	0.000235239	0.000255875	0.000315672	0.000128484	5.17337e-05	0.000197401
25	0.000244274	0.000266941	0.000331283	0.000130412	5.25176e-05	0.000205086
26	0.000247655	0.0002705	0.000335743	0.000131005	5.25176e-05	0.000207484
27	0.000248431	0.0002716	0.000339475	0.000131302	5.40853e-05	0.000208979
28	0.000248431	0.000271147	0.00033861	0.000130264	5.40853e-05	0.000208507
29	0.000249762	0.000273477	0.000339885	0.000130783	5.40853e-05	0.000209598
30	0.000220384	0.000249727	0.000308709	0.000123814	5.25176e-05	0.00019103
31	0.000371261	0.000342526	0.000453711	0.000162811	5.80045e-05	0.000277663
32	0.000389885	0.00035618	0.000480244	0.000165999	5.87883e-05	0.000290219
33	0.000399918	0.000362652	0.000491713	0.000165999	5.87883e-05	0.000295814
34	0.000408177	0.000370094	0.000499177	0.000166963	5.87883e-05	0.00030064
35	0.000409562	0.000371323	0.000500315	0.000166073	5.87883e-05	0.000301212
36	0.000409396	0.000369705	0.000497721	0.000163182	5.87883e-05	0.000299758
37	0.000414496	0.000387307	0.000510555	0.00016978	6.0356e-05	0.000308499
38	0.000423808	0.000432995	0.000540457	0.00018876	6.5843e-05	0.000330373
39	0.000424417	0.000452279	0.000548603	0.000198324	6.89783e-05	0.00033852
40	0.000424362	0.000458039	0.000549605	0.000199955	6.89783e-05	0.000340188
41	0.000420205	0.000458039	0.000544735	0.000198102	6.5843e-05	0.000337385
42	0.000421535	0.000459721	0.000545827	0.000198843	6.5843e-05	0.000338354
43	0.000420925	0.000459398	0.000545281	0.000198324	6.5843e-05	0.000337954
44	0.000411835	0.000447102	0.000532128	0.000189131	6.19237e-05	0.000328424
45	0.000351917	0.000400962	0.000466773	0.000152728	4.46791e-05	0.000283412
46	0.000365663	0.000420699	0.000480745	0.000166963	5.01661e-05	0.000296847
47	0.000367437	0.000424129	0.000483248	0.000170892	5.17337e-05	0.000299488
48	0.00036145	0.000417334	0.000474282	0.000167408	4.78145e-05	0.000293658
49	0.000352027	0.000412287	0.000464725	0.000165258	4.62468e-05	0.000288109
50	0.000364942	0.000421735	0.000478333	0.000171411	4.70307e-05	0.00029669
51	0.000364166	0.000419793	0.00047633	0.00017067	4.70307e-05	0.000295598
52	0.000364	0.000419793	0.000476012	0.000170596	4.70307e-05	0.000295486
53	0.000363778	0.000418693	0.00047501	0.000170299	4.62468e-05	0.000294805
54	0.000363224	0.000417075	0.000474237	0.00016978	4.62468e-05	0.000294113
55	0.00036073	0.000415716	0.000472917	0.000169187	4.62468e-05	0.000292959
56	0.000348369	0.000376953	0.000447248	0.000158289	4.23276e-05	0.000274637
57	0.000334678	0.000342138	0.000423081	0.000144647	3.60569e-05	0.00025612
58	0.000259295	0.000253093	0.000320132	0.000107058	3.13538e-05	0.000194186
59	0.000259628	0.000252963	0.000319313	0.00010728	3.05699e-05	0.000193951
60	0.000225595	0.000188574	0.000244901	8.74851e-05	2.5083e-05	0.000154328
61	0.000184023	0.000165342	0.000195702	7.87366e-05	1.72446e-05	0.00012821
62	0.00018103	0.000158159	0.000187692	7.65865e-05	1.72446e-05	0.000124142
63	0.000167395	0.00014211	0.000170944	6.97656e-05	1.72446e-05	0.000113492
64	0.000160521	0.000133891	0.000159884	6.66518e-05	1.56769e-05	0.000107325
65	0.000126045	0.000100305	0.000119515	4.91548e-05	1.25415e-05	8.15123e-05
66	0.000141454	0.000109753	0.000137401	5.28617e-05	1.25415e-05	9.08022e-05
67	0.000141565	0.000109818	0.000137356	5.28617e-05	1.25415e-05	9.08284e-05
68	0.000140955	0.000108265	0.000135854	5.2491e-05	1.25415e-05	9.00213e-05
69	0.00011446	8.91098e-05	0.000104678	4.41132e-05	8.62229e-06	7.21967e-05
70	0.000109804	8.67154e-05	0.000100718	4.22597e-05	9.40614e-06	6.97806e-05
71	9.91619e-05	8.08265e-05	9.24807e-05	3.8701e-05	9.40614e-06	6.41152e-05
72	6.8787e-05	6.39364e-05	7.28194e-05	2.63197e-05	8.62229e-06	4.8097e-05
73	7.64916e-05	7.07313e-05	8.29686e-05	3.44751e-05	9.40614e-06	5.48145e-05
74	8.4695e-05	8.03088e-05	9.49383e-05	4.27046e-05	1.019e-05	6.25673e-05
75	6.16921e-05	5.17704e-05	7.64149e-05	3.5513e-05	3.13538e-06	4.57052e-05
76	0.000341829	0.000239956	0.000325594	0.000271426	0.000188123	0.000273386
77	0.000348258	0.000241962	0.000332193	0.000276764	0.00019361	0.000278557
78	0.000348813	0.000242091	0.00033283	0.000276838	0.000194393	0.000278993
79	0.000349256	0.000242156	0.000333012	0.000276764	0.000195177	0.000279273
80	0.000348037	0.000239115	0.000329736	0.00027795	0.000195177	0.000278003
81	0.000356295	0.000247592	0.000339293	0.000290851	0.000203016	0.000287409
82	0.000364443	0.000251086	0.000344572	0.000301824	0.000206935	0.000293772
83	0.000388389	0.000263252	0.000361457	0.000313019	0.000213206	0.000307865
84	0.000387557	0.000262476	0.000360138	0.000314427	0.00021399	0.000307718
85	0.00045906	0.000376565	0.000463678	0.000425266	0.000548691	0.000454652
86	0.000474913	0.000421476	0.000498495	0.000467081	0.00061375	0.000495143
87	0.000487551	0.000447879	0.000518474	0.000498294	0.000645888	0.000519617
88	0.000549686	0.000560285	0.00061232	0.000616325	0.000754842	0.000618692
89	0.000553677	0.00056818	0.000619875	0.000627743	0.000768952	0.000627685
90	0.000555451	0.000573616	0.000623972	0.000632636	0.000776006	0.000632336
91	0.000555506	0.000573163	0.000623061	0.000634563	0.000778358	0.00063293
92	0.000569474	0.000600213	0.000642176	0.000659178	0.000794818	0.000653172
93	0.000568421	0.00059866	0.000639264	0.000657398	0.000795602	0.000651869
94	0.000564153	0.000592124	0.000629114	0.000651912	0.00079717	0.000646895
95	0.000506175	0.000541648	0.000555157	0.000621811	0.000800305	0.000605019
96	0.000668581	0.000833374	0.000769201	0.00103633	0.00148617	0.000958731
97	0.000721847	0.000864825	0.000804109	0.00108697	0.00153163	0.00100188
98	0.000724453	0.000866637	0.000806111	0.00108986	0.00153398	0.00100421
99	0.000723233	0.000866442	0.000804973	0.00109238	0.00153477	0.00100436
100	0.000694133	0.0008535	0.000781262	0.00109697	0.00153947	0.000993068
101	0.0012344	0.00197821	0.00145557	0.00245114	0.0043425	0.00229236
102	0.00125779	0.00202241	0.00149148	0.00251994	0.00446713	0.00235175
103	0.00129637	0.00212492	0.00154614	0.0026419	0.00466701	0.00245527
104	0.0014984	0.0029016	0.00192557	0.00340169	0.00655843	0.00325714
105	0.0015203	0.00297997	0.00196763	0.00349236	0.00669795	0.00333164
106	0.00162251	0.00314965	0.00210717	0.00366236	0.00693154	0.00349465
107	0.0016265	0.0031611	0.0021149	0.00367445	0.006948	0.00350499
108	0.00167012	0.00319482	0.00214981	0.00370915	0.00699425	0.00354363
109	0.00166341	0.00319436	0.00214362	0.00370529	0.00699738	0.00354081
110	0.00168381	0.00320381	0.00215345	0.00371975	0.00702403	0.00355697
111	0.00170421	0.00322115	0.00217352	0.00373309	0.00703971	0.00357434
112	0.00172145	0.00322918	0.00218927	0.00374214	0.00704676	0.00358576
113	0.00170975	0.00321824	0.00217839	0.00373153	0.00704676	0.00357694
114	0.00171363	0.00321708	0.00217985	0.00372761	0.00704128	0.00357589
115	0.00170127	0.00319928	0.00216538	0.00371463	0.00701306	0.00355872
116	0.00172367	0.00322264	0.00218763	0.00373472	0.00702795	0.00357932
117	0.00170986	0.00319132	0.00215964	0.00370017	0.00702168	0.00355654
118	0.00170632	0.00317223	0.00213793	0.00367942	0.00701306	0.00354179
119	0.00174949	0.00320912	0.0021819	0.00369773	0.00701776	0.0035712
120	0.00171086	0.0031281	0.00211959	0.00359786	0.00698092	0.00350747
121	0.00174401	0.00314913	0.00214749	0.00359801	0.00697935	0.0035236
122	0.0017062	0.00307904	0.00208623	0.00349836	0.00694878	0.00346373
123	0.00172666	0.00308442	0.00209925	0.0034799	0.00694251	0.00346655
124	0.00172921	0.00308176	0.00209879	0.00347635	0.00694173	0.00346557
125	0.00169457	0.00300676	0.00203417	0.00339679	0.00691037	0.00340853
126	0.00160106	0.00283993	0.00189604	0.00320158	0.00677007	0.00326173
127	0.0015607	0.00276435	0.0018386	0.00307606	0.0066909	0.00318612
128	0.00147291	0.00262961	0.00173137	0.0028767	0.00635463	0.00301304
129	0.00147363	0.00262664	0.00173156	0.00286751	0.00634757	0.00300938
130	0.00145345	0.00259655	0.00170807	0.00282399	0.00627389	0.00297119
131	0.000946056	0.00197867	0.001218	0.00201193	0.00444832	0.00212059
132	0.000994058	0.00196643	0.00124089	0.00196634	0.00434015	0.00210157
133	0.000998381	0.00193945	0.00123543	0.00193713	0.0042359	0.00206926
134	0.000900605	0.00128099	0.000944468	0.00125526	0.0021932	0.0013149
135	0.000685154	0.000757272	0.000637625	0.000678825	0.00047501	0.000646777
136	0.000711649	0.00078471	0.00067226	0.000701882	0.000479713	0.000670043
137	0.000644968	0.000713849	0.000611956	0.000593416	0.000379381	0.000588714
138	0.000645356	0.000713914	0.000612503	0.000593416	0.000379381	0.000588914
139	0.000644635	0.000712749	0.000611911	0.000590895	0.000377813	0.000587601
140	0.000644524	0.000712167	0.000611365	0.000589783	0.000375462	0.00058666
141	0.000636487	0.000678451	0.000589792	0.000550192	0.000335486	0.000558082
142	0.000620413	0.000640012	0.000567764	0.00051594	0.000303348	0.000529495
143	0.000604394	0.000618462	0.000552745	0.000492808	0.000273562	0.000508394
144	0.000593308	0.000600019	0.000542914	0.000478944	0.000259453	0.000494928
145	0.000563155	0.000531682	0.000496947	0.000413256	0.000192042	0.000439416
146	0.000433508	0.000360193	0.000359182	0.000263271	0.00011209	0.000305649
147	0.000456898	0.000368541	0.000374155	0.000276023	0.000118361	0.000318796
148	0.000456233	0.000366405	0.000372244	0.000273131	0.000116009	0.000316804
149	0.000455236	0.000364205	0.000370924	0.000272464	0.000116009	0.000315768
150	0.000416657	0.00029768	0.000313169	0.000227016	9.17098e-05	0.000269246
151	0.000338891	0.000204946	0.000246357	0.000179863	6.42753e-05	0.000206866
152	0.000270991	0.000152658	0.000201164	0.000147316	6.0356e-05	0.000166497
153	0.000234574	0.000137903	0.000186554	0.00014398	7.83845e-05	0.000156279
154	0.00022504	0.000133826	0.000179682	0.000146278	0.000101116	0.000157188
155	0.00019655	0.000116354	0.000152648	0.000131747	0.000113657	0.000142191
156	0.000117232	8.39975e-05	9.97626e-05	9.63077e-05	9.0926e-05	9.76452e-05
157	0.000313227	0.000177119	0.000193745	0.000174006	0.000160688	0.000203757
158	0.000317883	0.000179255	0.000195975	0.000175563	0.000161472	0.00020603
159	0.000318992	0.000176408	0.000192243	0.000173117	0.000161472	0.000204446
160	0.00032326	0.000177443	0.000191743	0.000173117	0.000160688	0.00020525
161	0.000425082	0.000233679	0.000250226	0.000237693	0.000180284	0.000265393
162	0.000430404	0.000236138	0.000253639	0.000240658	0.000180284	0.000268225
163	0.000437332	0.000240344	0.000258327	0.000245551	0.000180284	0.000272368
164	0.000469924	0.000259111	0.000283859	0.000259712	0.000181852	0.000290892
165	0.000474636	0.000261894	0.000287364	0.000262159	0.000181852	0.000293581
166	0.000501352	0.000285384	0.000314853	0.000280694	0.000190474	0.000314551
167	0.000505177	0.000288814	0.000319222	0.00028314	0.000190474	0.000317365
168	0.000508059	0.000290885	0.00032168	0.000284327	0.000190474	0.000319085
169	0.000508613	0.000291403	0.000321998	0.000283733	0.000190474	0.000319244
170	0.000509057	0.000291467	0.000322044	0.000283511	0.000190474	0.000319311
171	0.000509279	0.000291467	0.00032168	0.000283289	0.000190474	0.000319238
172	0.000500909	0.000284543	0.000308663	0.000270759	0.000186555	0.000310286
173	0.000508558	0.00028629	0.000311212	0.000270759	0.000185771	0.000312518
174	0.000505676	0.000285125	0.000308618	0.000267126	0.000184987	0.000310306
175	0.000506008	0.000284284	0.000307161	0.000265495	0.000184203	0.00030943
176	0.000465545	0.000267718	0.000284178	0.00024266	0.000172446	0.000286509
177	0.000492096	0.000273671	0.000295192	0.000247182	0.000172446	0.000296117
178	0.000491985	0.00027283	0.0002941	0.000245848	0.000171662	0.000295285
179	0.00043251	0.000213488	0.00024258	0.000193431	9.48452e-05	0.000235371
180	0.000485832	0.000240862	0.000273164	0.000225459	0.000100332	0.00026513
181	0.000494978	0.000245003	0.000278807	0.000231835	0.000100332	0.000270191
182	0.000487661	0.000238467	0.000272527	0.000223013	9.0926e-05	0.000262519
183	0.000496364	0.000240279	0.000275349	0.000222865	8.93583e-05	0.000264843
184	0.0004901	0.000233873	0.000268249	0.000214338	8.23037e-05	0.000257773
185	0.00047713	0.000221383	0.000255278	0.000202773	7.28976e-05	0.000245892
186	0.000477906	0.000220542	0.000255369	0.000201735	7.28976e-05	0.00024569
187	0.000457286	0.000203199	0.000233295	0.000183422	6.5843e-05	0.000228609
188	0.00042669	0.000179449	0.000207308	0.000164961	5.33014e-05	0.000206342
189	0.000362503	0.000145216	0.000168714	0.000137233	4.46791e-05	0.000171669
190	0.000369321	0.000149746	0.000176314	0.000140347	4.78145e-05	0.000176709
191	0.000365774	0.000148452	0.000175358	0.000137159	4.78145e-05	0.000174912
192	0.00036206	0.000146187	0.000172673	0.000135305	4.78145e-05	0.000172808
193	0.000216504	7.6879e-05	0.000102721	8.23694e-05	2.58669e-05	0.000100868
194	0.000506563	0.000323241	0.000336016	0.00032414	0.000453846	0.000388761
195	0.000511329	0.000328548	0.000339794	0.000327698	0.000457765	0.000393027
196	0.000513879	0.000331784	0.000341887	0.000328514	0.000459333	0.000395079
197	0.000516152	0.000333531	0.000343116	0.000328959	0.000460901	0.000396532
198	0.000516761	0.000334372	0.000343435	0.000329997	0.000461684	0.00039725
199	0.000509722	0.000329842	0.000339157	0.000325474	0.000461684	0.000393176
200	0.000505343	0.000336508	0.000337609	0.00033578	0.000460117	0.000395071
201	0.000497251	0.000357086	0.000338792	0.000366029	0.00046482	0.000404796
202	0.000663814	0.000590894	0.000469549	0.000593861	0.0005628	0.000576184
203	0.000707159	0.000626292	0.000508234	0.000634341	0.00057691	0.000610587
204	0.000705773	0.000627975	0.000509144	0.000633525	0.000577694	0.000610822
205	0.000707214	0.000629593	0.000510328	0.000634638	0.000577694	0.000611893
206	0.000706217	0.00063024	0.000510419	0.000636046	0.000577694	0.000612123
207	0.000656885	0.00061568	0.000489711	0.000624258	0.000575342	0.000592375
208	0.000833481	0.000995674	0.000678268	0.00100986	0.000753275	0.000854112
209	0.000856816	0.00104427	0.000713084	0.00106109	0.000764249	0.000887903
210	0.0008592	0.00105463	0.000720139	0.00107192	0.000767384	0.000894653
211	0.000866849	0.00106893	0.000731289	0.00108778	0.000774439	0.000905857
212	0.000896725	0.0011473	0.000767107	0.00116459	0.000822253	0.000959594
213	0.000826608	0.0011097	0.00070867	0.00110854	0.00060748	0.000872199
214	0.0011573	0.00173127	0.00109575	0.00163041	0.00110836	0.00134462
215	0.00116705	0.00175864	0.00111755	0.00164628	0.00111071	0.00136005
216	0.00116943	0.00176654	0.00112087	0.00164857	0.00111228	0.00136354
217	0.00116927	0.00176796	0.00112074	0.00164724	0.00111149	0.00136334
218	0.00115253	0.00174861	0.00110162	0.00162759	0.00104643	0.00133536
219	0.00113379	0.00174156	0.00109247	0.00161788	0.00102527	0.00132219
220	0.0012166	0.0019854	0.00120748	0.00188063	0.00168291	0.00159461
221	0.00121732	0.00199161	0.00121185	0.00188738	0.00170173	0.00160198
222	0.00122026	0.00200274	0.00121813	0.00189991	0.00173465	0.00161514
223	0.00122037	0.00200345	0.00121863	0.0019008	0.00173622	0.00161589
224	0.00119221	0.00198701	0.00120043	0.00187752	0.00170878	0.00159319
225	0.00119355	0.00198993	0.00120266	0.00188115	0.00171113	0.00159568
226	0.00119355	0.00199154	0.00120193	0.00187893	0.00171192	0.00159557
227	0.00119759	0.00199678	0.00120475	0.0018816	0.00171819	0.00159978
228	0.00117481	0.00195977	0.00117148	0.00183748	0.00170878	0.00157047
229	0.00119027	0.00201115	0.00119956	0.00189116	0.00185536	0.0016295
230	0.00118335	0.0020316	0.00120029	0.00191526	0.00189847	0.00164579
231	0.00120358	0.00210835	0.00123424	0.00198502	0.00206935	0.00172011
232	0.00117836	0.00210841	0.00121822	0.00198599	0.00209365	0.00171693
233	0.00114033	0.00209152	0.0011825	0.00197123	0.00212735	0.00170259
234	0.00117919	0.00214155	0.00122409	0.00199992	0.0021446	0.00173787
235	0.00117625	0.00213889	0.00122086	0.00199414	0.00214303	0.00173464
236	0.00108313	0.00203011	0.00111409	0.00189672	0.00209443	0.0016437
237	0.00110763	0.00206499	0.00114176	0.00192252	0.0021007	0.00166752
238	0.000988404	0.0019865	0.00105429	0.00184623	0.00206073	0.00158723
239	0.00108912	0.00214329	0.00118468	0.00199229	0.00222612	0.0017271
240	0.001092	0.00214685	0.00118973	0.0019937	0.0022269	0.00172984
241	0.00109211	0.00214601	0.00119101	0.0019894	0.0022222	0.00172814
242	0.00109294	0.00214782	0.00119296	0.00198895	0.00222142	0.00172882
243	0.00106689	0.00209761	0.00115983	0.00194669	0.00219398	0.001693
244	0.00102781	0.00204312	0.00111514	0.00189405	0.00213441	0.00164291
245	0.00101191	0.00203212	0.00110545	0.00187722	0.00210149	0.00162564
246	0.00102161	0.00204758	0.00111605	0.00188805	0.00210149	0.00163496
247	0.00102183	0.00204713	0.00111637	0.0018859	0.00209992	0.00163423
248	0.00101396	0.00202668	0.00110685	0.00186847	0.00208503	0.0016202
249	0.00100947	0.00201219	0.00109971	0.00185009	0.00207876	0.00161004
250	0.000992506	0.00196326	0.00107727	0.0018145	0.00205681	0.00158087
251	0.000991951	0.00195977	0.00107641	0.0018099	0.00205367	0.00157834
252	0.000954537	0.00188017	0.00103199	0.0017328	0.0020137	0.00152264
253	0.000889796	0.0017864	0.000972003	0.00165095	0.00196118	0.00145206
254	0.000890351	0.00177747	0.000968271	0.00163997	0.00195099	0.00144541
255	0.000849056	0.00163569	0.000913565	0.00145944	0.00179344	0.00133024
256	0.000848613	0.00163368	0.000913156	0.00145796	0.00179265	0.00132921
257	0.000825444	0.00154172	0.000874197	0.00136825	0.00169389	0.0012607
258	0.000558333	0.000853953	0.000549741	0.000791443	0.000855958	0.000721886
259	0.000553289	0.000813895	0.000529033	0.000715969	0.000811279	0.000684693
260	0.000414274	0.000524499	0.000364552	0.000459148	0.000406815	0.000433858
261	0.000436778	0.000563844	0.000387126	0.000491622	0.000398977	0.000455669
262	0.000269771	0.000332301	0.000231156	0.000254596	9.17098e-05	0.000235907
263	0.000340775	0.000499584	0.000321953	0.000368327	0.000360569	0.000378242
264	0.00032459	0.000479588	0.00029988	0.000346456	0.000345675	0.000359238
265	0.000344933	0.000524369	0.000326459	0.000377669	0.000361352	0.000386956
266	0.000345598	0.000525858	0.000326049	0.00037752	0.000360569	0.000387119
267	0.000291721	0.000486965	0.000282812	0.00034438	0.000344108	0.000349997
268	0.000377968	0.000679422	0.000393407	0.000578514	0.000447575	0.000495377
269	0.000383511	0.000690164	0.000404057	0.000594973	0.000450711	0.000504683
270	0.000374531	0.000676704	0.000399779	0.000590005	0.000440521	0.000496308
271	0.000376471	0.00068091	0.000403784	0.000593342	0.000442088	0.000499319
272	0.000375751	0.000680522	0.000403147	0.000592748	0.000442088	0.000498851
273	0.000376083	0.000681363	0.000402783	0.00059223	0.000442088	0.000498909
274	0.000361339	0.000668485	0.000389766	0.00058489	0.000438953	0.000488687
275	0.000376471	0.000729316	0.000416573	0.000645314	0.000450711	0.000523677
276	0.000377635	0.000738117	0.000421488	0.000654729	0.000451495	0.000528693
277	0.000376361	0.000736046	0.000420851	0.000653617	0.000451495	0.000527674
278	0.000376305	0.000736434	0.000421033	0.000653617	0.000451495	0.000527777
279	0.000376361	0.000736563	0.000421124	0.000653543	0.000451495	0.000527817
280	0.000376305	0.000736046	0.000421169	0.00065295	0.000451495	0.000527593
281	0.000374698	0.00073171	0.000418757	0.000649169	0.000451495	0.000525166
282	0.000374698	0.00073158	0.000418848	0.000648947	0.000451495	0.000525114
283	0.000371649	0.000726339	0.00041589	0.000643683	0.000446791	0.00052087
284	0.000360342	0.000706407	0.000404239	0.000630931	0.000446008	0.000509585
285	0.000364831	0.000710613	0.000410884	0.000630708	0.000449143	0.000513236
286	0.000364388	0.00071029	0.000410884	0.000630189	0.000449143	0.000512979
287	0.000348258	0.000679098	0.000391951	0.000610097	0.00044444	0.000494769
288	0.000324091	0.000645771	0.000370787	0.000587929	0.000435818	0.000472879
289	0.000338503	0.000687252	0.000389812	0.000608763	0.000440521	0.00049297
290	0.000335177	0.000678969	0.000384532	0.000599273	0.000442872	0.000488165
291	0.000304414	0.000611991	0.000343389	0.000538033	0.000409167	0.000441399
292	0.00044487	0.00102687	0.000516927	0.000895907	0.00106995	0.000790904
293	0.000452797	0.00104984	0.00052653	0.000916443	0.00108563	0.000806247
294	0.000453573	0.00105715	0.000525938	0.000919335	0.00109111	0.000809422
295	0.000400472	0.000947398	0.000450479	0.000803825	0.00101116	0.000722667
296	0.000612598	0.00143126	0.000725828	0.00118023	0.0016931	0.0011286
297	0.000610602	0.00142957	0.00072337	0.00116867	0.00169389	0.00112522
298	0.00063366	0.00148762	0.00076738	0.00120574	0.00170878	0.00116064
299	0.000627397	0.00147934	0.000761373	0.00119313	0.00170408	0.00115306
300	0.000618418	0.00150684	0.000770566	0.0012345	0.0017417	0.00117441
301	0.00085798	0.00250634	0.00129787	0.00236647	0.00316752	0.00203923
302	0.000944449	0.00291357	0.00152293	0.00282755	0.00383222	0.00240814
303	0.000967452	0.00304054	0.00159261	0.00296115	0.00402975	0.0025183
304	0.00097244	0.00307969	0.00161322	0.00300089	0.00406424	0.0025461
305	0.000976875	0.00310189	0.00162688	0.00303039	0.00407286	0.00256178
306	0.000965013	0.00307432	0.00161263	0.00302053	0.00407364	0.00254923
307	0.000990787	0.00325086	0.00167858	0.00321693	0.00425784	0.002679
308	0.00101418	0.00339115	0.00173497	0.00336736	0.00442324	0.00278618
309	0.00101845	0.00347315	0.0017595	0.00345633	0.0045024	0.00284197
310	0.00109449	0.00374138	0.00189039	0.00373161	0.00494214	0.00308
311	0.00110541	0.00378629	0.00191001	0.00377083	0.00497036	0.00310858
312	0.00110297	0.00379218	0.00191119	0.00377372	0.00497898	0.00311181
313	0.00109034	0.00378895	0.00190537	0.00377031	0.00498917	0.00310883
314	0.00113174	0.00391132	0.00196876	0.00388701	0.00518435	0.00321664
315	0.00113335	0.00391688	0.00197109	0.00389338	0.00518592	0.00322012
316	0.00113013	0.00391811	0.00196863	0.00389464	0.0051867	0.00321964
317	0.00113856	0.00396296	0.00198715	0.00393927	0.00524157	0.0032539
318	0.00113235	0.00395105	0.00197714	0.00392978	0.0052353	0.00324513
319	0.00113501	0.00395662	0.00198087	0.00393357	0.0052447	0.00325015
320	0.0011354	0.00395752	0.00198092	0.00393349	0.0052447	0.00325041
321	0.00113535	0.0039583	0.00198151	0.00393386	0.00524706	0.00325121
322	0.00113235	0.00395209	0.00197782	0.00392853	0.00524549	0.00324726
323	0.00103779	0.00373459	0.00184875	0.00372775	0.00488257	0.00304629
324	0.00105636	0.00381794	0.00188543	0.0038297	0.00498604	0.00311509
325	0.00105697	0.00382176	0.00188716	0.00383511	0.00498995	0.00311819
326	0.00104932	0.00379729	0.0018766	0.00382302	0.00496409	0.00310207
327	0.00104871	0.00379063	0.00187519	0.0038185	0.00496879	0.00310036
328	0.00104882	0.00379147	0.00187496	0.00381909	0.00496958	0.00310078
329	0.00104067	0.00374643	0.00185157	0.00377513	0.00491706	0.00306617
330	0.00104139	0.00375083	0.00185439	0.00378158	0.00491627	0.00306889
331	0.00101052	0.00364807	0.00180224	0.00368742	0.00476107	0.00298186
332	0.00101091	0.00364962	0.00180187	0.00368742	0.00475794	0.00298155
333	0.000948274	0.00338106	0.00165405	0.00341407	0.00417632	0.00271476
334	0.000948883	0.00338138	0.00165505	0.0034157	0.00417476	0.00271515
335	0.00094711	0.00336786	0.00165022	0.00340109	0.00417319	0.0027079
336	0.000945447	0.0033533	0.00164408	0.00338931	0.00417005	0.00270044
337	0.000892069	0.00314175	0.00152839	0.00319573	0.00409402	0.00257039
338	0.000890461	0.00312997	0.00152261	0.00317934	0.00409716	0.00256391
339	0.000890461	0.00312557	0.00152124	0.00317423	0.00409637	0.00256157
340	0.000887579	0.00309652	0.00150791	0.00311721	0.00408775	0.00253939
341	0.00086186	0.00297874	0.0014451	0.00296782	0.00405091	0.00246089
342	0.000859865	0.00295298	0.00143422	0.00294083	0.00404621	0.00244682
343	0.000792685	0.00268876	0.00129482	0.00265443	0.00386357	0.00225885
344	0.000777553	0.00259493	0.00125891	0.00255983	0.00372013	0.00218227
345	0.000776833	0.00259298	0.00125859	0.0025579	0.00372013	0.00218129
346	0.000720295	0.00237963	0.0011688	0.0023228	0.00329528	0.00197736
347	0.000719464	0.00237561	0.00116748	0.00231917	0.00329372	0.00197509
348	0.000711482	0.00229893	0.00113525	0.0022325	0.0032169	0.00191901
349	0.0005922	0.00173612	0.000871285	0.0017675	0.00192434	0.00137829
350	0.000590094	0.00172201	0.000866824	0.00175682	0.00190396	0.00136794
351	0.000521916	0.00148206	0.000731153	0.00150919	0.00152928	0.00115472
352	0.000431623	0.00120347	0.000591658	0.00123769	0.00125885	0.000944659
353	0.00042935	0.00118897	0.000586925	0.0012239	0.00124945	0.000935719
354	0.000418597	0.00113222	0.000562985	0.00116407	0.00120869	0.000897312
355	7.75447e-05	0.000177767	9.62582e-05	0.00020774	0.00019361	0.000150584
356	8.71339e-05	0.000193686	0.00010932	0.000231168	0.000195961	0.000163454
357	8.50276e-05	0.000174143	0.000102084	0.000210706	0.00018342	0.000151076
358	4.14052e-05	8.60683e-05	5.00634e-05	0.000106687	7.99522e-05	7.28352e-05
359	5.85327e-05	0.000102894	6.59471e-05	0.000124926	8.38714e-05	8.72342e-05
360	6.01955e-05	0.000106194	6.77676e-05	0.000127743	8.38714e-05	8.91543e-05
361	6.0251e-05	0.000106323	6.78131e-05	0.000127669	8.38714e-05	8.91855e-05
362	5.75904e-05	9.99169e-05	6.44907e-05	0.000119143	8.0736e-05	8.43754e-05
363	5.90315e-05	0.000104576	6.72214e-05	0.000124036	8.15198e-05	8.72769e-05
364	5.9087e-05	0.000104641	6.73125e-05	0.000124258	8.15198e-05	8.73637e-05
365	5.89761e-05	0.000104576	6.7358e-05	0.000124184	8.15198e-05	8.73228e-05
366	5.89761e-05	0.000104641	6.7267e-05	0.000124036	8.15198e-05	8.7288e-05
367	5.80338e-05	0.000102635	6.67208e-05	0.000121589	7.91683e-05	8.56294e-05
368	5.80338e-05	0.000102764	6.67663e-05	0.000121664	7.91683e-05	8.56793e-05
369	5.79784e-05	0.00010257	6.65388e-05	0.00012107	7.91683e-05	8.54651e-05
370	5.77567e-05	0.000102247	6.66753e-05	0.000120181	7.91683e-05	8.52057e-05
371	5.7923e-05	0.000102117	6.66298e-05	0.00011981	7.91683e-05	8.51296e-05
372	5.64818e-05	9.66165e-05	6.43542e-05	0.000110394	7.91683e-05	8.1403e-05
373	4.40658e-05	7.22197e-05	5.13377e-05	8.03677e-05	5.01661e-05	5.96314e-05
374	5.35995e-05	8.49035e-05	5.9894e-05	9.84578e-05	5.40853e-05	7.0188e-05
375	5.35995e-05	8.50329e-05	5.99395e-05	9.89026e-05	5.40853e-05	7.0312e-05
376	5.43755e-05	8.76214e-05	6.10318e-05	0.000102832	5.48691e-05	7.2146e-05
377	4.88881e-05	7.90146e-05	5.35223e-05	9.11921e-05	3.44892e-05	6.14213e-05
378	8.23116e-05	0.000128649	9.32999e-05	0.000156213	4.5463e-05	0.000101187
379	8.75219e-05	0.00013525	9.87159e-05	0.000164813	4.62468e-05	0.00010651
380	8.90184e-05	0.000136803	9.99902e-05	0.000168668	4.70307e-05	0.000108302
381	8.95173e-05	0.000134991	9.88979e-05	0.000167334	4.70307e-05	0.000107554
382	9.75544e-05	0.0001601	0.000112096	0.000190317	5.01661e-05	0.000122047
383	9.91064e-05	0.00016683	0.000115237	0.000195878	5.09499e-05	0.0001256
384	9.95499e-05	0.000168642	0.000116147	0.000197286	5.09499e-05	0.000126515
385	9.99933e-05	0.000169936	0.000116602	0.00019825	5.09499e-05	0.000127146
386	0.000100381	0.00017013	0.000116875	0.000198991	5.09499e-05	0.000127465
387	0.000100215	0.000169742	0.000116784	0.000198176	5.09499e-05	0.000127173
388	0.000100104	0.000169548	0.000116238	0.000197286	5.09499e-05	0.000126825
389	9.9827e-05	0.000168189	0.000115328	0.000194988	4.93822e-05	0.000125543
390	0.000100049	0.000167866	0.000115555	0.00019484	4.93822e-05	0.000125538
391	9.89402e-05	0.000165536	0.000114099	0.000192319	4.93822e-05	0.000124055
392	9.71664e-05	0.000157706	0.000110185	0.00018572	4.46791e-05	0.000119091
393	9.63904e-05	0.000154794	0.000108091	0.00018231	4.23276e-05	0.000116783
394	0.000101379	0.000166054	0.000115737	0.000191577	4.31115e-05	0.000123572
395	0.000103929	0.000172201	0.000121199	0.000196619	4.5463e-05	0.000127882
396	0.000104816	0.000173366	0.000121153	0.000196174	4.5463e-05	0.000128194
397	9.36744e-05	0.000151105	0.000103267	0.000165629	3.91922e-05	0.000110574
398	9.52819e-05	0.00015324	0.000105588	0.00016637	3.60569e-05	0.000111307
399	9.52264e-05	0.000153111	0.000105452	0.000165703	3.60569e-05	0.00011111
400	9.5171e-05	0.000152982	0.000105406	0.000165406	3.60569e-05	0.000111004
401	9.50602e-05	0.000152658	0.000105224	0.000165035	3.60569e-05	0.000110807
402	9.31202e-05	0.000145734	0.000101902	0.000155842	3.60569e-05	0.000106531
403	8.49167e-05	0.000133244	9.23897e-05	0.00014309	3.37053e-05	9.74691e-05
404	8.53601e-05	0.000133244	9.25717e-05	0.000143387	3.37053e-05	9.76536e-05
405	8.53047e-05	0.000133179	9.25717e-05	0.000143312	3.37053e-05	9.76145e-05
406	8.53047e-05	0.000133179	9.25262e-05	0.00014309	3.37053e-05	9.7561e-05
407	8.48059e-05	0.000132079	9.20256e-05	0.000142942	3.37053e-05	9.71116e-05
408	8.47504e-05	0.000132015	9.18435e-05	0.000142719	3.37053e-05	9.70066e-05
409	8.47504e-05	0.000131885	9.1798e-05	0.000142423	3.37053e-05	9.69123e-05
410	8.4695e-05	0.00013182	9.17525e-05	0.000142423	3.37053e-05	9.68792e-05
411	8.22561e-05	0.000128714	8.96589e-05	0.000138419	3.29215e-05	9.43939e-05
412	8.22561e-05	0.000128714	8.95679e-05	0.000138197	3.29215e-05	9.43313e-05
413	8.10921e-05	0.000125737	8.81115e-05	0.000131153	3.13538e-05	9.14895e-05
414	8.06487e-05	0.000125155	8.77474e-05	0.000129597	3.05699e-05	9.07436e-05
415	7.87641e-05	0.000120237	8.49712e-05	0.000122183	2.90023e-05	8.70315e-05
416	7.63253e-05	0.000116095	8.18308e-05	0.00011766	2.90023e-05	8.41827e-05
417	1.06423e-05	5.63003e-06	5.82556e-06	8.30367e-06	1.56769e-06	6.39385e-06
418	1.14737e-05	5.63003e-06	5.78004e-06	8.89679e-06	1.56769e-06	6.66965e-06
419	1.14183e-05	5.43589e-06	5.73453e-06	8.30367e-06	1.56769e-06	6.49202e-06
420	7.42744e-06	2.84737e-06	3.41341e-06	4.89323e-06	7.83845e-07	3.87306e-06
421	8.20344e-06	2.9768e-06	3.68648e-06	5.26393e-06	3.13538e-06	4.65321e-06
422	7.09487e-06	2.26496e-06	2.36663e-06	4.30011e-06	3.13538e-06	3.83239e-06
423	8.86859e-06	2.91209e-06	2.95829e-06	5.41221e-06	3.91922e-06	4.81408e-06
424	9.03487e-06	2.84737e-06	3.0038e-06	5.41221e-06	3.91922e-06	4.84349e-06
425	8.81316e-06	2.71795e-06	2.82175e-06	5.26393e-06	3.91922e-06	4.7072e-06
426	8.36973e-06	2.58852e-06	2.6397e-06	5.33807e-06	3.91922e-06	4.57105e-06
427	6.81773e-06	2.0061e-06	2.18458e-06	4.44839e-06	5.48691e-06	4.18874e-06
428	1.26932e-05	4.07692e-06	4.32365e-06	6.82087e-06	6.27076e-06	6.83708e-06
429	1.3192e-05	4.14163e-06	4.36917e-06	6.74673e-06	6.27076e-06	6.94406e-06
430	1.49103e-05	4.40048e-06	4.8698e-06	7.48813e-06	7.0546e-06	7.74466e-06
431	1.49657e-05	4.40048e-06	4.8698e-06	7.48813e-06	7.0546e-06	7.75574e-06
432	1.4356e-05	4.20635e-06	4.55121e-06	7.04329e-06	7.0546e-06	7.44229e-06
433	2.19497e-05	6.4713e-06	7.78258e-06	1.26038e-05	7.83845e-06	1.13292e-05
434	2.1728e-05	6.40659e-06	7.78258e-06	1.23814e-05	7.83845e-06	1.12274e-05
435	3.60841e-05	1.06129e-05	1.46549e-05	1.97212e-05	1.019e-05	1.82526e-05
436	3.64721e-05	1.10012e-05	1.4928e-05	1.97212e-05	1.019e-05	1.84625e-05
437	6.49624e-05	2.36202e-05	3.43617e-05	3.72924e-05	2.97861e-05	3.80046e-05
438	6.78447e-05	2.52381e-05	3.66373e-05	4.0258e-05	3.13538e-05	4.02664e-05
439	6.88978e-05	2.53028e-05	3.70924e-05	4.07769e-05	3.13538e-05	4.06847e-05
440	0.000122608	4.73052e-05	7.30015e-05	7.69572e-05	7.28976e-05	7.85539e-05
441	0.000126599	4.91819e-05	7.60508e-05	7.91814e-05	7.44652e-05	8.10957e-05
442	0.000136022	5.7271e-05	8.65641e-05	8.71885e-05	7.68168e-05	8.87725e-05
443	0.000137131	5.78534e-05	8.72468e-05	8.77075e-05	7.68168e-05	8.93511e-05
444	0.000137408	5.81123e-05	8.73378e-05	8.77816e-05	7.68168e-05	8.94913e-05
445	0.000137408	5.80476e-05	8.73378e-05	8.77816e-05	7.68168e-05	8.94784e-05
446	0.000150045	6.37423e-05	9.77601e-05	9.43801e-05	8.0736e-05	9.73327e-05
447	0.000150323	6.38717e-05	9.78966e-05	9.43801e-05	8.0736e-05	9.74415e-05
448	0.000150489	6.39364e-05	9.78966e-05	9.44542e-05	8.0736e-05	9.75024e-05
449	0.000150045	6.3807e-05	9.77601e-05	9.40835e-05	8.23037e-05	9.75999e-05
450	0.000167616	7.84322e-05	0.000120061	0.000113805	0.000102684	0.00011652
451	0.000167949	7.85616e-05	0.00012088	0.000114101	0.000102684	0.000116835
452	0.000168171	7.89499e-05	0.000121381	0.000114101	0.000102684	0.000117057
453	0.00016806	7.90146e-05	0.000122064	0.000113656	0.000103467	0.000117252
454	0.000168171	7.92734e-05	0.000122564	0.000113879	0.000103467	0.000117471
455	0.000168004	7.92734e-05	0.000122337	0.000113656	0.000103467	0.000117347
456	0.000163515	7.51318e-05	0.000117194	0.000107429	0.000102684	0.000113191
457	0.000145279	6.6525e-05	0.000105816	9.51956e-05	9.0926e-05	0.000100748
458	0.00016418	7.09902e-05	0.000122928	9.86802e-05	9.48452e-05	0.000110325
459	0.000164291	7.09255e-05	0.000122883	9.84578e-05	9.48452e-05	0.000110281
460	0.000164235	7.05372e-05	0.00012261	9.79388e-05	9.40614e-05	0.000109876
461	0.000163681	7.00195e-05	0.000121699	9.66043e-05	9.32775e-05	0.000109056
462	0.000136687	5.23528e-05	0.0001004	7.42882e-05	6.81945e-05	8.63845e-05
463	0.000144946	5.58473e-05	0.000110139	7.70314e-05	6.89783e-05	9.13884e-05
464	0.000145667	5.59767e-05	0.000110458	7.70314e-05	6.89783e-05	9.16223e-05
465	0.000144447	5.50061e-05	0.000108956	7.48072e-05	6.81945e-05	9.02822e-05
466	0.000139015	5.18351e-05	0.000103677	6.84311e-05	6.34914e-05	8.52899e-05
467	0.000134137	4.91819e-05	0.000101356	6.25741e-05	5.72207e-05	8.08939e-05
468	0.000134248	4.96349e-05	0.000102129	6.24999e-05	5.72207e-05	8.11465e-05
469	0.000102709	3.56569e-05	7.96918e-05	3.84045e-05	3.60569e-05	5.85038e-05
470	0.000108252	3.83101e-05	8.34238e-05	4.15183e-05	3.60569e-05	6.15122e-05
471	0.000108474	3.83748e-05	8.34693e-05	4.12959e-05	3.60569e-05	6.15342e-05
472	0.000105259	3.64334e-05	8.042e-05	3.94424e-05	3.21376e-05	5.87385e-05
473	7.37201e-05	2.27143e-05	5.4387e-05	1.99436e-05	1.019e-05	3.6191e-05
474	8.54156e-05	3.4492e-05	6.84958e-05	3.09905e-05	1.41092e-05	4.67006e-05
475	8.5859e-05	3.46215e-05	6.89054e-05	3.1287e-05	1.41092e-05	4.69564e-05
476	8.36418e-05	3.42979e-05	6.71304e-05	3.10646e-05	1.41092e-05	4.60488e-05
477	8.25887e-05	3.39096e-05	6.5674e-05	3.06939e-05	1.41092e-05	4.53951e-05
478	8.39744e-05	3.39743e-05	6.60381e-05	3.06939e-05	1.33254e-05	4.56012e-05
479	8.32538e-05	3.37802e-05	6.60836e-05	3.06939e-05	1.33254e-05	4.54274e-05
480	8.34201e-05	3.37802e-05	6.61747e-05	3.07681e-05	1.25415e-05	4.53369e-05
481	8.31984e-05	3.37802e-05	6.5674e-05	3.06939e-05	1.25415e-05	4.51776e-05
482	7.93184e-05	3.23565e-05	6.26247e-05	2.99525e-05	1.25415e-05	4.33587e-05
483	7.71013e-05	3.20329e-05	6.15324e-05	2.92853e-05	1.25415e-05	4.24987e-05
484	7.50504e-05	3.15152e-05	5.92113e-05	2.89887e-05	1.25415e-05	4.14614e-05
485	7.14475e-05	2.91856e-05	5.57979e-05	2.77283e-05	1.25415e-05	3.93402e-05
486	6.74013e-05	2.63382e-05	4.91531e-05	2.60231e-05	1.09738e-05	3.59779e-05
487	4.73361e-05	2.03199e-05	3.39976e-05	2.26868e-05	7.83845e-06	2.64358e-05
488	5.80338e-05	2.28437e-05	3.87764e-05	2.76542e-05	1.72446e-05	3.29105e-05
489	5.77012e-05	2.28437e-05	3.83667e-05	2.74318e-05	1.64607e-05	3.25608e-05
490	5.84772e-05	2.29731e-05	3.86853e-05	2.81732e-05	1.64607e-05	3.29539e-05
491	5.82001e-05	2.29731e-05	3.83667e-05	2.8099e-05	1.64607e-05	3.28199e-05
492	5.81447e-05	2.29084e-05	3.82757e-05	2.80249e-05	1.64607e-05	3.27629e-05
493	3.69155e-05	8.08913e-06	1.81138e-05	1.58659e-05	1.09738e-05	1.79916e-05
494	3.96869e-05	8.28326e-06	1.86145e-05	1.62366e-05	1.17577e-05	1.89158e-05
495	3.94098e-05	8.15384e-06	1.84324e-05	1.57918e-05	1.17577e-05	1.87091e-05
496	3.65275e-05	7.70085e-06	1.71581e-05	1.46797e-05	1.17577e-05	1.75648e-05
497	5.12715e-05	1.12601e-05	2.32567e-05	2.00919e-05	2.038e-05	2.5252e-05
498	5.14932e-05	1.13248e-05	2.33932e-05	2.04626e-05	2.038e-05	2.54108e-05
499	5.19921e-05	1.15836e-05	2.37573e-05	2.07592e-05	2.11638e-05	2.58512e-05
500	5.19921e-05	1.15836e-05	2.38029e-05	2.07592e-05	2.11638e-05	2.58603e-05
501	5.19921e-05	1.15836e-05	2.38484e-05	2.07592e-05	2.11638e-05	2.58694e-05
502	5.19921e-05	1.15836e-05	2.38029e-05	2.07592e-05	2.11638e-05	2.58603e-05
503	5.14378e-05	1.11306e-05	2.32112e-05	2.04626e-05	2.11638e-05	2.54812e-05
504	5.04955e-05	1.03541e-05	2.16183e-05	2.00919e-05	2.11638e-05	2.47447e-05
505	4.99967e-05	1.01599e-05	2.12997e-05	1.97954e-05	2.11638e-05	2.44831e-05
506	4.19595e-05	8.73626e-06	1.72036e-05	1.60884e-05	2.038e-05	2.08736e-05
507	4.38995e-05	8.86568e-06	1.77042e-05	1.61625e-05	2.038e-05	2.14024e-05
508	4.39549e-05	8.86568e-06	1.74767e-05	1.61625e-05	2.038e-05	2.1368e-05
509	4.38441e-05	8.67154e-06	1.73401e-05	1.59401e-05	2.038e-05	2.12352e-05
510	3.18715e-05	5.11233e-06	1.07864e-05	8.30367e-06	1.4893e-05	1.41934e-05
511	3.50863e-05	5.56532e-06	1.23338e-05	8.97093e-06	1.4893e-05	1.53699e-05
512	3.49755e-05	5.56532e-06	1.24703e-05	8.97093e-06	1.4893e-05	1.5375e-05
513	3.51418e-05	5.69474e-06	1.25158e-05	9.04507e-06	1.25415e-05	1.49878e-05
514	3.03195e-05	5.43589e-06	1.14691e-05	8.45195e-06	1.25415e-05	1.36436e-05
515	3.69709e-05	6.08302e-06	1.45184e-05	9.19335e-06	1.25415e-05	1.58614e-05
516	3.66383e-05	5.88888e-06	1.42453e-05	9.11921e-06	1.25415e-05	1.56866e-05
517	3.64721e-05	5.75946e-06	1.42908e-05	9.11921e-06	1.25415e-05	1.56366e-05
518	3.71372e-05	5.75946e-06	1.44274e-05	9.11921e-06	1.25415e-05	1.5797e-05
519	3.71926e-05	5.75946e-06	1.44729e-05	9.26749e-06	1.25415e-05	1.58468e-05
520	3.71372e-05	5.75946e-06	1.44729e-05	9.19335e-06	1.25415e-05	1.58209e-05
521	3.68046e-05	5.75946e-06	1.44274e-05	9.04507e-06	1.25415e-05	1.57156e-05
522	3.12063e-05	4.52991e-06	1.20152e-05	6.67259e-06	8.62229e-06	1.26093e-05
523	3.23149e-05	4.65934e-06	1.26524e-05	7.11743e-06	1.019e-05	1.33868e-05
524	3.23149e-05	4.65934e-06	1.26979e-05	7.11743e-06	1.019e-05	1.33959e-05
525	3.13172e-05	4.40048e-06	1.22883e-05	6.89501e-06	9.40614e-06	1.28614e-05
526	2.31138e-05	2.52381e-06	9.23897e-06	3.70699e-06	4.70307e-06	8.65733e-06
527	2.4444e-05	2.45909e-06	9.51204e-06	3.78113e-06	5.48691e-06	9.13663e-06
528	1.90675e-05	1.61783e-06	7.5095e-06	2.89146e-06	3.13538e-06	6.84433e-06
529	2.38343e-05	2.20024e-06	9.01141e-06	3.63286e-06	3.13538e-06	8.36284e-06
530	2.42223e-05	2.20024e-06	9.19345e-06	3.63286e-06	3.13538e-06	8.47685e-06
531	2.38343e-05	2.07082e-06	8.78384e-06	3.41044e-06	3.13538e-06	8.24696e-06
532	2.37235e-05	2.26496e-06	9.05692e-06	3.78113e-06	3.13538e-06	8.39238e-06
533	2.98206e-05	2.91209e-06	1.12415e-05	5.04151e-06	7.0546e-06	1.12141e-05
534	2.98206e-05	2.71795e-06	1.08774e-05	4.96737e-06	7.0546e-06	1.10876e-05
535	2.9488e-05	2.71795e-06	1.09684e-05	4.96737e-06	7.83845e-06	1.1196e-05
536	2.95435e-05	2.71795e-06	1.07409e-05	4.81909e-06	8.62229e-06	1.12887e-05
537	3.07075e-05	3.04151e-06	1.13325e-05	5.48635e-06	8.62229e-06	1.1838e-05
538	3.05412e-05	3.23565e-06	1.14235e-05	5.63463e-06	9.40614e-06	1.20482e-05
539	2.93772e-05	3.17094e-06	1.02402e-05	5.48635e-06	9.40614e-06	1.15362e-05
540	2.69383e-05	2.78266e-06	9.42101e-06	5.11565e-06	9.40614e-06	1.07328e-05
541	3.88001e-05	5.37118e-06	1.62478e-05	1.00089e-05	1.41092e-05	1.69074e-05
542	3.89109e-05	5.43589e-06	1.62023e-05	1.0083e-05	1.41092e-05	1.69483e-05
543	3.92435e-05	5.50061e-06	1.62933e-05	1.02313e-05	1.41092e-05	1.70756e-05
544	3.74143e-05	5.56532e-06	1.55196e-05	9.71233e-06	1.33254e-05	1.63074e-05
545	5.45418e-05	1.55958e-05	3.31328e-05	3.00267e-05	3.91922e-05	3.44979e-05
546	5.49298e-05	1.59194e-05	3.3588e-05	3.01749e-05	3.91922e-05	3.47609e-05
547	5.49298e-05	1.59194e-05	3.3861e-05	3.01749e-05	3.91922e-05	3.48155e-05
548	5.49298e-05	1.59194e-05	3.39521e-05	3.01749e-05	3.91922e-05	3.48337e-05
549	5.40984e-05	1.59194e-05	3.32239e-05	2.99525e-05	3.91922e-05	3.44773e-05
550	5.14932e-05	1.55958e-05	3.24047e-05	2.97301e-05	3.91922e-05	3.36832e-05
551	5.25464e-05	1.57253e-05	3.32694e-05	2.98784e-05	3.91922e-05	3.41223e-05
552	5.24909e-05	1.57253e-05	3.32694e-05	2.98784e-05	3.91922e-05	3.41112e-05
553	5.20475e-05	1.57253e-05	3.31328e-05	2.97301e-05	3.91922e-05	3.39656e-05
554	5.19921e-05	1.57253e-05	3.31328e-05	2.97301e-05	3.91922e-05	3.39545e-05
555	5.18258e-05	1.56605e-05	3.31328e-05	2.97301e-05	3.91922e-05	3.39083e-05
556	5.17704e-05	1.56605e-05	3.30418e-05	2.9656e-05	3.91922e-05	3.38642e-05
557	5.17149e-05	1.56605e-05	3.29963e-05	2.9656e-05	3.91922e-05	3.3844e-05
558	4.83892e-05	1.52723e-05	3.20861e-05	2.89887e-05	3.91922e-05	3.27857e-05
559	4.71144e-05	1.52076e-05	3.15399e-05	2.83956e-05	3.91922e-05	3.22899e-05
560	3.80795e-05	1.3525e-05	2.84906e-05	2.57265e-05	3.60569e-05	2.83757e-05
561	3.81903e-05	1.35897e-05	2.84906e-05	2.57265e-05	3.60569e-05	2.84108e-05
562	3.81349e-05	1.35897e-05	2.84451e-05	2.55783e-05	3.60569e-05	2.8361e-05
563	3.81349e-05	1.35897e-05	2.83996e-05	2.55783e-05	3.60569e-05	2.83519e-05
564	3.50863e-05	1.21013e-05	2.46221e-05	2.35765e-05	3.29215e-05	2.56615e-05
565	1.69612e-05	5.04761e-06	1.24248e-05	1.10468e-05	1.019e-05	1.11341e-05
566	1.70166e-05	5.04761e-06	1.24248e-05	1.09727e-05	9.40614e-06	1.09736e-05
567	1.552e-05	4.14163e-06	1.04223e-05	8.00711e-06	9.40614e-06	9.49944e-06
568	4.15715e-06	7.76556e-07	2.68522e-06	1.63108e-06	3.13538e-06	2.47708e-06
569	4.32344e-06	8.41269e-07	2.45766e-06	1.63108e-06	2.35153e-06	2.321e-06
570	2.10629e-06	3.88278e-07	5.91658e-07	3.70699e-07	1.56769e-06	1.00492e-06
571	3.21486e-06	6.4713e-07	8.19219e-07	5.93119e-07	7.83845e-07	1.21163e-06
572	3.21486e-06	4.52991e-07	7.28194e-07	5.93119e-07	7.83845e-07	1.1546e-06
573	1.01989e-05	1.16483e-06	3.14034e-06	1.1121e-06	7.83845e-07	3.28e-06
574	1.09749e-05	1.22955e-06	3.32239e-06	1.1121e-06	7.83845e-07	3.48456e-06
575	1.06977e-05	1.16483e-06	3.23136e-06	1.1121e-06	7.83845e-07	3.39797e-06
576	1.40235e-05	1.4884e-06	4.00507e-06	1.4828e-06	7.83845e-07	4.35672e-06
577	1.41343e-05	1.4884e-06	3.91404e-06	1.40866e-06	7.83845e-07	4.34585e-06
578	2.23378e-05	2.78266e-06	6.41721e-06	2.5949e-06	0	6.82651e-06
579	2.31692e-05	2.84737e-06	6.64477e-06	2.66904e-06	0	7.06608e-06
580	2.35018e-05	2.91209e-06	6.78131e-06	2.74318e-06	0	7.18768e-06
581	5.25464e-05	6.92429e-06	1.99343e-05	9.48991e-06	2.35153e-06	1.82493e-05
582	5.27681e-05	6.92429e-06	1.99343e-05	9.48991e-06	2.35153e-06	1.82936e-05
583	5.29344e-05	6.92429e-06	1.98888e-05	9.56405e-06	2.35153e-06	1.83326e-05
584	7.79881e-05	9.70695e-06	2.99015e-05	1.40866e-05	4.70307e-06	2.72772e-05
585	7.82098e-05	9.70695e-06	3.00835e-05	1.40866e-05	4.70307e-06	2.7358e-05
586	7.82653e-05	9.70695e-06	3.01746e-05	1.41607e-05	4.70307e-06	2.74021e-05
587	8.00944e-05	9.83638e-06	3.04476e-05	1.45314e-05	4.70307e-06	2.79226e-05
588	8.14801e-05	9.90109e-06	3.06752e-05	1.45314e-05	4.70307e-06	2.82582e-05
589	8.18681e-05	9.9658e-06	3.07207e-05	1.47538e-05	4.70307e-06	2.84023e-05
590	8.26441e-05	1.00305e-05	3.09027e-05	1.4828e-05	4.70307e-06	2.86217e-05
591	8.25333e-05	9.9658e-06	3.10393e-05	1.47538e-05	4.70307e-06	2.85991e-05
592	0.000132197	2.04493e-05	5.55248e-05	3.78855e-05	1.09738e-05	5.14061e-05
593	0.00013835	2.0967e-05	5.89382e-05	4.07769e-05	1.25415e-05	5.43147e-05
594	0.000147828	2.39438e-05	6.45817e-05	4.78944e-05	1.41092e-05	5.96714e-05
595	0.000163903	3.21624e-05	7.96007e-05	5.81998e-05	1.64607e-05	7.00653e-05
596	0.000166231	3.33919e-05	8.28776e-05	5.99792e-05	1.64607e-05	7.17881e-05
597	0.000177815	3.90867e-05	9.5439e-05	6.43534e-05	1.64607e-05	7.8631e-05
598	0.000176651	3.91514e-05	9.43467e-05	6.42793e-05	1.64607e-05	7.81778e-05
599	0.000179367	3.95396e-05	9.56665e-05	6.465e-05	1.64607e-05	7.91368e-05
600	0.000165898	3.63687e-05	8.79295e-05	6.06464e-05	1.64607e-05	7.34607e-05
601	0.000170609	3.65628e-05	8.93859e-05	6.08689e-05	1.64607e-05	7.47775e-05
602	0.000170111	3.63687e-05	8.92038e-05	6.0424e-05	1.64607e-05	7.45136e-05
603	0.000165067	3.59804e-05	8.77474e-05	5.95343e-05	1.4893e-05	7.26444e-05
604	0.00018236	4.14163e-05	9.78511e-05	6.53914e-05	2.19477e-05	8.17933e-05
605	0.000182637	4.14163e-05	9.82152e-05	6.54655e-05	2.27315e-05	8.20931e-05
606	0.00018236	4.1481e-05	9.79877e-05	6.52431e-05	2.27315e-05	8.19607e-05
607	0.000181972	4.1481e-05	9.78966e-05	6.53173e-05	2.27315e-05	8.18797e-05
608	0.000180753	4.13516e-05	9.7578e-05	6.50207e-05	2.27315e-05	8.1487e-05
609	0.000180476	4.13516e-05	9.74415e-05	6.48724e-05	2.27315e-05	8.13746e-05
610	0.000159302	3.94102e-05	9.07057e-05	6.19068e-05	2.5083e-05	7.52815e-05
611	0.000168725	4.29694e-05	9.64858e-05	6.68742e-05	2.58669e-05	8.01843e-05
612	0.000168891	4.30989e-05	9.64858e-05	6.68742e-05	2.58669e-05	8.02434e-05
613	0.000169501	4.31636e-05	9.67133e-05	6.66518e-05	2.58669e-05	8.03793e-05
614	0.000167505	4.3293e-05	9.62582e-05	6.70225e-05	2.27315e-05	7.9362e-05
615	0.000167616	4.36813e-05	9.63492e-05	6.71707e-05	2.19477e-05	7.9353e-05
616	0.000127874	3.22918e-05	7.00887e-05	4.27046e-05	1.64607e-05	5.7884e-05
617	0.000144503	3.91514e-05	8.0602e-05	5.37514e-05	1.80284e-05	6.72072e-05
618	0.000145001	3.92808e-05	8.15123e-05	5.41963e-05	1.80284e-05	6.76038e-05
619	0.000143172	3.90219e-05	8.02834e-05	5.301e-05	1.72446e-05	6.65464e-05
620	0.000143172	3.88925e-05	8.03289e-05	5.301e-05	1.88123e-05	6.68431e-05
621	0.000140456	3.77277e-05	7.82809e-05	5.16014e-05	1.88123e-05	6.53757e-05
622	0.000139791	3.75335e-05	7.72796e-05	5.0341e-05	1.88123e-05	6.47515e-05
623	8.49721e-05	2.3232e-05	4.07334e-05	3.05456e-05	1.17577e-05	3.82482e-05
624	9.05704e-05	2.40732e-05	4.32821e-05	3.11388e-05	1.33254e-05	4.0478e-05
625	8.8575e-05	2.37497e-05	4.28269e-05	3.07681e-05	1.33254e-05	3.9849e-05
626	7.87087e-05	2.29084e-05	4.06423e-05	2.99525e-05	1.33254e-05	3.71075e-05
627	0.000102765	3.38449e-05	5.80735e-05	3.98131e-05	1.88123e-05	5.06618e-05
628	0.000103042	3.41038e-05	5.83011e-05	3.99614e-05	1.88123e-05	5.08441e-05
629	0.000103042	3.41038e-05	5.83466e-05	3.99614e-05	1.88123e-05	5.08532e-05
630	0.000103153	3.39743e-05	5.83011e-05	3.9739e-05	1.88123e-05	5.07959e-05
631	0.000101102	3.3586e-05	5.67537e-05	3.72182e-05	1.88123e-05	4.94944e-05
632	0.000101102	3.3586e-05	5.67537e-05	3.70699e-05	1.88123e-05	4.94648e-05
633	0.00010088	3.34566e-05	5.66171e-05	3.69217e-05	1.88123e-05	4.93375e-05
634	9.31202e-05	3.03504e-05	5.15198e-05	3.32888e-05	1.88123e-05	4.54183e-05
635	9.2843e-05	3.00268e-05	5.12922e-05	3.31405e-05	1.88123e-05	4.5223e-05
636	8.99053e-05	2.85384e-05	4.93807e-05	3.1287e-05	1.80284e-05	4.3428e-05
637	6.98401e-05	2.13553e-05	3.90949e-05	2.50593e-05	1.80284e-05	3.46756e-05
638	8.52493e-05	3.37155e-05	5.34313e-05	3.46233e-05	2.74346e-05	4.68908e-05
639	8.60253e-05	3.39743e-05	5.41595e-05	3.47716e-05	2.74346e-05	4.72731e-05
640	8.8187e-05	3.52686e-05	5.59344e-05	3.68475e-05	2.97861e-05	4.92047e-05
641	8.0039e-05	3.30683e-05	5.12467e-05	3.42526e-05	2.82184e-05	4.5365e-05
642	8.2755e-05	3.88278e-05	5.68447e-05	3.75889e-05	2.35153e-05	4.79063e-05
643	8.41407e-05	3.92161e-05	5.78004e-05	3.78855e-05	2.35153e-05	4.85116e-05
644	8.3919e-05	3.92161e-05	5.76184e-05	3.78113e-05	2.35153e-05	4.8416e-05
645	8.3919e-05	3.90219e-05	5.74818e-05	3.75889e-05	2.35153e-05	4.83054e-05
646	7.0339e-05	3.28742e-05	4.62859e-05	3.15095e-05	1.80284e-05	3.98074e-05
647	7.35538e-05	3.37155e-05	4.75602e-05	3.21026e-05	1.80284e-05	4.09921e-05
648	7.36093e-05	3.37155e-05	4.76057e-05	3.20284e-05	1.80284e-05	4.09975e-05
649	7.37755e-05	3.36508e-05	4.76512e-05	3.19543e-05	1.88123e-05	4.11688e-05
650	7.37201e-05	3.36508e-05	4.76057e-05	3.19543e-05	1.88123e-05	4.11486e-05
651	7.36647e-05	3.36508e-05	4.75602e-05	3.19543e-05	1.88123e-05	4.11285e-05
652	7.2667e-05	3.32625e-05	4.71506e-05	3.15095e-05	1.88123e-05	4.06804e-05
653	7.2667e-05	3.32625e-05	4.71506e-05	3.15095e-05	1.88123e-05	4.06804e-05
654	7.17801e-05	3.29389e-05	4.6741e-05	3.06939e-05	1.88123e-05	4.01932e-05
655	7.17801e-05	3.28742e-05	4.66955e-05	3.06198e-05	1.88123e-05	4.01564e-05
656	7.12258e-05	3.26154e-05	4.59673e-05	3.03232e-05	1.80284e-05	3.9632e-05
657	4.81675e-05	2.12259e-05	2.82175e-05	2.00178e-05	1.41092e-05	2.63476e-05
658	4.97195e-05	2.14847e-05	2.86271e-05	1.99436e-05	1.41092e-05	2.67768e-05
659	4.96641e-05	2.12259e-05	2.83541e-05	1.97212e-05	1.33254e-05	2.64581e-05
660	4.91098e-05	2.07082e-05	2.77624e-05	1.89057e-05	1.33254e-05	2.59623e-05
661	4.72806e-05	2.0061e-05	2.6215e-05	1.76453e-05	1.33254e-05	2.49055e-05
662	1.40789e-05	3.04151e-06	5.05185e-06	3.26216e-06	4.70307e-06	6.0275e-06
663	2.11737e-05	5.82417e-06	9.32999e-06	6.00533e-06	4.70307e-06	9.40725e-06
664	2.35572e-05	6.40659e-06	1.09684e-05	7.48813e-06	4.70307e-06	1.06247e-05
665	2.4832e-05	6.73015e-06	1.16511e-05	7.56227e-06	5.48691e-06	1.12525e-05
666	2.51092e-05	6.73015e-06	1.18332e-05	7.56227e-06	5.48691e-06	1.13443e-05
667	2.51092e-05	6.73015e-06	1.18332e-05	7.56227e-06	5.48691e-06	1.13443e-05
668	2.33355e-05	6.34187e-06	1.14235e-05	6.89501e-06	4.70307e-06	1.05398e-05
669	2.6772e-05	7.57142e-06	1.23793e-05	7.48813e-06	4.70307e-06	1.17828e-05
670	2.69938e-05	7.57142e-06	1.25158e-05	7.56227e-06	4.70307e-06	1.18693e-05
671	2.70492e-05	7.57142e-06	1.25158e-05	7.56227e-06	4.70307e-06	1.18804e-05
672	2.72155e-05	7.57142e-06	1.26069e-05	7.63641e-06	4.70307e-06	1.19467e-05
673	2.73818e-05	7.57142e-06	1.26069e-05	7.63641e-06	4.70307e-06	1.19799e-05
674	2.73818e-05	7.57142e-06	1.26524e-05	7.63641e-06	4.70307e-06	1.1989e-05
675	2.72155e-05	7.50671e-06	1.26069e-05	7.63641e-06	4.70307e-06	1.19337e-05
676	2.71046e-05	7.57142e-06	1.26069e-05	7.48813e-06	4.70307e-06	1.18948e-05
677	2.71046e-05	7.57142e-06	1.26069e-05	7.41399e-06	4.70307e-06	1.188e-05
678	2.69938e-05	7.442e-06	1.24703e-05	7.33985e-06	4.70307e-06	1.17898e-05
679	2.32246e-05	6.73015e-06	1.06498e-05	6.52431e-06	7.83845e-07	9.58254e-06
680	2.35018e-05	6.79487e-06	1.06954e-05	6.52431e-06	7.83845e-07	9.66005e-06
681	2.1728e-05	6.53601e-06	1.02402e-05	6.45017e-06	7.83845e-07	9.14765e-06
682	2.25595e-05	6.66544e-06	1.05588e-05	6.45017e-06	7.83845e-07	9.40355e-06
683	2.2504e-05	6.60073e-06	1.03768e-05	6.37603e-06	7.83845e-07	9.32828e-06
684	1.81806e-05	5.24175e-06	7.32746e-06	4.07769e-06	7.83845e-07	7.12227e-06
685	2.10075e-05	5.43589e-06	8.10116e-06	4.22597e-06	7.83845e-07	7.91087e-06
686	2.10075e-05	5.43589e-06	8.14667e-06	4.22597e-06	7.83845e-07	7.91998e-06
687	2.07857e-05	5.37118e-06	8.05565e-06	4.15183e-06	7.83845e-07	7.82964e-06
688	1.6684e-05	3.10622e-06	5.78004e-06	1.8535e-06	7.83845e-07	5.64152e-06
689	1.8236e-05	3.36508e-06	6.28068e-06	1.92764e-06	7.83845e-07	6.11865e-06
690	1.8236e-05	3.36508e-06	6.28068e-06	1.92764e-06	7.83845e-07	6.11865e-06
691	1.60189e-05	2.78266e-06	5.14287e-06	1.40866e-06	7.83845e-07	5.22739e-06
692	1.74046e-05	3.10622e-06	5.64351e-06	1.4828e-06	7.83845e-07	5.6842e-06
693	1.74046e-05	3.10622e-06	5.64351e-06	1.4828e-06	7.83845e-07	5.6842e-06
694	1.71275e-05	2.91209e-06	5.50697e-06	1.33452e-06	7.83845e-07	5.53299e-06
695	1.67395e-05	2.71795e-06	5.32492e-06	1.33452e-06	7.83845e-07	5.38015e-06
696	1.69612e-05	2.71795e-06	5.41595e-06	1.33452e-06	7.83845e-07	5.44269e-06
697	1.68503e-05	2.65323e-06	5.37043e-06	1.33452e-06	7.83845e-07	5.39847e-06
698	1.29703e-05	1.81196e-06	3.50444e-06	1.03796e-06	7.83845e-07	4.0217e-06
699	1.47995e-05	1.87668e-06	4.05058e-06	1.1121e-06	0	4.36777e-06
700	1.44669e-05	1.68254e-06	3.91404e-06	1.1121e-06	0	4.23512e-06
701	1.9012e-05	2.65323e-06	6.14414e-06	2.00178e-06	0	5.96223e-06
702	1.90675e-05	2.65323e-06	6.14414e-06	2.00178e-06	0	5.97333e-06
703	1.90675e-05	2.65323e-06	6.14414e-06	2.00178e-06	0	5.97333e-06
704	1.90675e-05	2.65323e-06	6.14414e-06	2.00178e-06	0	5.97333e-06
705	1.89566e-05	2.65323e-06	6.14414e-06	2.00178e-06	0	5.95115e-06
706	1.89012e-05	2.65323e-06	6.09863e-06	2.00178e-06	0	5.93097e-06
707	1.552e-05	2.07082e-06	4.68775e-06	1.40866e-06	0	4.73745e-06
708	2.03977e-05	2.52381e-06	6.14414e-06	2.37248e-06	2.35153e-06	6.75793e-06
709	2.06195e-05	2.52381e-06	6.09863e-06	2.37248e-06	2.35153e-06	6.79319e-06
710	1.91783e-05	2.52381e-06	5.68902e-06	2.2242e-06	2.35153e-06	6.39337e-06
711	2.65503e-05	3.55922e-06	8.41975e-06	3.48458e-06	3.91922e-06	9.18661e-06
712	2.65503e-05	3.55922e-06	8.41975e-06	3.48458e-06	3.91922e-06	9.18661e-06
713	2.64949e-05	3.55922e-06	8.37424e-06	3.48458e-06	3.91922e-06	9.16643e-06
714	2.62732e-05	3.55922e-06	8.37424e-06	3.3363e-06	3.91922e-06	9.09244e-06
715	2.93218e-05	3.94749e-06	9.64858e-06	3.92941e-06	3.91922e-06	1.01533e-05
716	2.93772e-05	3.94749e-06	9.64858e-06	3.92941e-06	3.91922e-06	1.01644e-05
717	2.91555e-05	4.01221e-06	9.51204e-06	3.92941e-06	3.91922e-06	1.01057e-05
718	2.92109e-05	3.94749e-06	9.7396e-06	4.00355e-06	3.91922e-06	1.01642e-05
719	2.76035e-05	3.81807e-06	9.46653e-06	4.00355e-06	3.91922e-06	9.76217e-06
720	3.65275e-05	6.60073e-06	1.39722e-05	6.00533e-06	5.48691e-06	1.37185e-05
721	3.67492e-05	6.60073e-06	1.40177e-05	6.00533e-06	6.27076e-06	1.39287e-05
722	3.74698e-05	6.66544e-06	1.41998e-05	6.07947e-06	6.27076e-06	1.41371e-05
723	3.74698e-05	6.66544e-06	1.41998e-05	6.07947e-06	6.27076e-06	1.41371e-05
724	3.66938e-05	6.4713e-06	1.37902e-05	6.00533e-06	6.27076e-06	1.38463e-05
725	3.64166e-05	6.40659e-06	1.36081e-05	6.00533e-06	6.27076e-06	1.37415e-05
726	3.41995e-05	6.27716e-06	1.26524e-05	5.78291e-06	6.27076e-06	1.30365e-05
727	3.40332e-05	6.27716e-06	1.26524e-05	5.78291e-06	6.27076e-06	1.30033e-05
728	3.32018e-05	6.27716e-06	1.22428e-05	5.41221e-06	6.27076e-06	1.26809e-05
729	3.20378e-05	6.21245e-06	1.17876e-05	5.26393e-06	5.48691e-06	1.21577e-05
730	2.49429e-05	4.91819e-06	9.87614e-06	4.00355e-06	3.91922e-06	9.532e-06
731	2.47212e-05	4.91819e-06	9.87614e-06	4.00355e-06	3.91922e-06	9.48766e-06
732	2.25595e-05	4.27106e-06	8.92038e-06	3.63286e-06	3.13538e-06	8.50384e-06
733	2.26703e-05	4.27106e-06	8.87487e-06	3.55872e-06	3.13538e-06	8.50207e-06
734	2.12846e-05	4.20635e-06	8.73833e-06	3.41044e-06	3.13538e-06	8.15502e-06
735	2.15063e-05	4.20635e-06	8.78384e-06	3.41044e-06	3.13538e-06	8.20846e-06
736	2.134e-05	4.20635e-06	8.78384e-06	3.41044e-06	3.13538e-06	8.1752e-06
737	2.07303e-05	4.14163e-06	8.2377e-06	3.18802e-06	3.13538e-06	7.88661e-06
738	2.07857e-05	4.14163e-06	8.2377e-06	3.18802e-06	3.13538e-06	7.89769e-06
739	2.0564e-05	4.07692e-06	8.14667e-06	3.11388e-06	3.13538e-06	7.80737e-06
740	2.0176e-05	4.01221e-06	8.01014e-06	2.89146e-06	3.13538e-06	7.64504e-06
741	1.92892e-05	3.94749e-06	7.60053e-06	2.66904e-06	3.13538e-06	7.32833e-06
742	1.89012e-05	3.94749e-06	7.55502e-06	2.66904e-06	3.13538e-06	7.24163e-06
743	1.71829e-05	3.68864e-06	7.0999e-06	2.5949e-06	3.13538e-06	6.74034e-06
744	1.70166e-05	3.68864e-06	7.00887e-06	2.5949e-06	3.13538e-06	6.68888e-06
745	1.68503e-05	3.68864e-06	7.00887e-06	2.5949e-06	2.35153e-06	6.49885e-06
746	1.37463e-05	3.23565e-06	5.64351e-06	2.07592e-06	1.56769e-06	5.25381e-06
747	6.20801e-06	1.94139e-06	3.91404e-06	1.55694e-06	1.56769e-06	3.03761e-06
748	9.36744e-06	2.20024e-06	4.64224e-06	1.63108e-06	1.56769e-06	3.88174e-06
749	9.14573e-06	2.20024e-06	4.64224e-06	1.55694e-06	1.56769e-06	3.82257e-06
750	9.81087e-06	2.20024e-06	4.91531e-06	1.55694e-06	1.56769e-06	4.01021e-06
751	9.70002e-06	2.07082e-06	4.82429e-06	1.40866e-06	1.56769e-06	3.9143e-06
752	9.8663e-06	2.07082e-06	5.00634e-06	1.40866e-06	1.56769e-06	3.98396e-06
753	9.8663e-06	2.07082e-06	4.96082e-06	1.40866e-06	1.56769e-06	3.97486e-06
754	9.92173e-06	1.94139e-06	4.96082e-06	1.40866e-06	1.56769e-06	3.96006e-06
755	8.75773e-06	8.41269e-07	3.32239e-06	3.70699e-07	1.56769e-06	2.97196e-06
756	8.75773e-06	8.41269e-07	3.32239e-06	3.70699e-07	1.56769e-06	2.97196e-06
757	8.48059e-06	8.41269e-07	3.23136e-06	3.70699e-07	1.56769e-06	2.89832e-06
758	8.48059e-06	8.41269e-07	3.23136e-06	3.70699e-07	1.56769e-06	2.89832e-06
759	6.7623e-06	7.76556e-07	2.54868e-06	1.4828e-07	7.83845e-07	2.20393e-06
760	6.7623e-06	7.76556e-07	2.54868e-06	1.4828e-07	0	2.04716e-06
761	6.7623e-06	7.76556e-07	2.54868e-06	1.4828e-07	0	2.04716e-06
762	6.70687e-06	7.76556e-07	2.54868e-06	1.4828e-07	0	2.03608e-06
763	6.54058e-06	7.76556e-07	2.36663e-06	1.4828e-07	0	1.96641e-06
764	6.59601e-06	7.76556e-07	2.36663e-06	1.4828e-07	0	1.9775e-06
765	6.3743e-06	5.82417e-07	2.2301e-06	1.4828e-07	0	1.86702e-06
766	6.48515e-06	5.82417e-07	2.2301e-06	1.4828e-07	0	1.88919e-06
767	6.15258e-06	5.17704e-07	2.13907e-06	1.4828e-07	0	1.79153e-06
768	6.3743e-06	5.17704e-07	2.13907e-06	1.4828e-07	0	1.83587e-06
769	6.3743e-06	5.17704e-07	2.13907e-06	1.4828e-07	0	1.83587e-06
770	6.3743e-06	5.17704e-07	1.95702e-06	1.4828e-07	0	1.79946e-06
771	6.42972e-06	5.17704e-07	2.00253e-06	1.4828e-07	0	1.81965e-06
772	6.3743e-06	3.23565e-07	1.866e-06	1.4828e-07	0	1.74243e-06
773	6.04172e-06	3.23565e-07	1.59293e-06	7.41399e-08	0	1.60647e-06
774	5.82001e-06	2.58852e-07	1.59293e-06	7.41399e-08	0	1.54919e-06
775	6.70687e-06	3.88278e-07	1.82049e-06	7.41399e-08	0	1.79796e-06
776	6.65144e-06	3.88278e-07	1.82049e-06	7.41399e-08	0	1.78687e-06
777	6.7623e-06	4.52991e-07	1.91151e-06	7.41399e-08	0	1.84019e-06
778	6.7623e-06	4.52991e-07	1.91151e-06	7.41399e-08	0	1.84019e-06
779	6.7623e-06	4.52991e-07	1.91151e-06	7.41399e-08	0	1.84019e-06
780	6.87315e-06	4.52991e-07	1.91151e-06	7.41399e-08	0	1.86236e-06
781	7.87087e-06	5.82417e-07	2.2301e-06	2.9656e-07	0	2.19599e-06
782	7.87087e-06	5.82417e-07	2.2301e-06	2.9656e-07	0	2.19599e-06
783	8.36973e-06	1.29426e-06	2.68522e-06	8.89679e-07	7.83845e-07	2.80455e-06
784	8.53601e-06	1.42369e-06	2.68522e-06	8.89679e-07	7.83845e-07	2.86369e-06
785	8.59144e-06	1.42369e-06	2.68522e-06	8.89679e-07	7.83845e-07	2.87477e-06
786	8.59144e-06	1.42369e-06	2.68522e-06	8.89679e-07	7.83845e-07	2.87477e-06
787	8.59144e-06	1.4884e-06	2.68522e-06	8.89679e-07	7.83845e-07	2.88772e-06
788	8.59144e-06	1.4884e-06	2.68522e-06	8.89679e-07	7.83845e-07	2.88772e-06
789	9.0903e-06	1.74725e-06	3.14034e-06	1.26038e-06	7.83845e-07	3.20442e-06
790	8.75773e-06	1.74725e-06	3.09483e-06	1.26038e-06	7.83845e-07	3.12881e-06
791	9.0903e-06	2.07082e-06	3.41341e-06	1.40866e-06	7.83845e-07	3.35341e-06
792	7.48287e-06	2.07082e-06	2.73073e-06	1.33452e-06	7.83845e-07	2.88056e-06
793	9.42287e-06	2.26496e-06	3.04931e-06	1.33452e-06	7.83845e-07	3.3711e-06
794	9.42287e-06	2.26496e-06	3.04931e-06	1.33452e-06	7.83845e-07	3.3711e-06
795	9.42287e-06	2.26496e-06	3.09483e-06	1.33452e-06	7.83845e-07	3.38021e-06
796	9.03487e-06	2.20024e-06	2.95829e-06	1.33452e-06	7.83845e-07	3.26235e-06
797	9.81087e-06	2.26496e-06	3.54995e-06	1.70522e-06	7.83845e-07	3.62297e-06
798	8.09258e-06	2.13553e-06	3.32239e-06	1.77936e-06	7.83845e-07	3.22274e-06
799	1.68503e-05	3.4945e-06	6.28068e-06	2.5949e-06	3.13538e-06	6.47115e-06
800	1.65732e-05	3.4945e-06	6.50824e-06	2.5949e-06	3.13538e-06	6.46124e-06
801	4.14606e-05	2.58852e-05	3.58636e-05	2.15747e-05	1.72446e-05	2.84057e-05
802	4.51744e-05	2.99621e-05	4.33276e-05	2.64679e-05	1.88123e-05	3.27489e-05
803	4.56178e-05	3.1127e-05	4.41013e-05	2.66904e-05	2.038e-05	3.35833e-05
804	4.83892e-05	3.30683e-05	4.74237e-05	2.92853e-05	2.038e-05	3.57093e-05
805	4.88881e-05	3.33272e-05	4.76512e-05	2.95077e-05	2.038e-05	3.59508e-05
806	4.91098e-05	3.33272e-05	4.76967e-05	2.95077e-05	2.038e-05	3.60043e-05
807	4.97749e-05	3.3586e-05	4.81063e-05	2.9656e-05	2.038e-05	3.63006e-05
808	5.11052e-05	3.39096e-05	4.888e-05	2.98042e-05	2.038e-05	3.68158e-05
809	5.14378e-05	3.39096e-05	4.90621e-05	2.99525e-05	2.038e-05	3.69484e-05
810	5.22138e-05	3.42979e-05	4.99268e-05	3.03232e-05	2.11638e-05	3.75851e-05
811	5.22692e-05	3.44273e-05	4.99723e-05	3.03232e-05	2.11638e-05	3.76312e-05
812	5.23247e-05	3.44273e-05	4.99723e-05	3.03232e-05	2.11638e-05	3.76423e-05
813	5.27681e-05	3.4492e-05	5.01544e-05	3.03974e-05	2.11638e-05	3.77951e-05
814	6.77338e-05	4.16752e-05	6.06677e-05	3.58096e-05	2.42992e-05	4.60371e-05
815	6.85098e-05	4.18693e-05	6.11683e-05	3.58837e-05	2.42992e-05	4.63461e-05
816	7.00064e-05	4.20635e-05	6.20331e-05	3.61803e-05	2.42992e-05	4.69165e-05
817	7.0339e-05	4.20635e-05	6.21241e-05	3.61803e-05	2.42992e-05	4.70012e-05
818	7.2279e-05	4.25812e-05	6.38991e-05	3.64027e-05	2.42992e-05	4.78922e-05
819	7.25007e-05	4.25812e-05	6.39901e-05	3.64027e-05	2.42992e-05	4.79548e-05
820	7.27224e-05	4.25812e-05	6.40356e-05	3.64027e-05	2.42992e-05	4.80082e-05
821	7.27224e-05	4.25812e-05	6.40356e-05	3.64027e-05	2.42992e-05	4.80082e-05
822	6.82327e-05	3.7663e-05	5.78004e-05	3.21026e-05	2.11638e-05	4.33925e-05
823	6.43527e-05	3.54627e-05	5.40684e-05	2.98784e-05	1.80284e-05	4.03581e-05
824	4.61166e-05	2.60146e-05	3.86853e-05	2.15747e-05	1.09738e-05	2.8673e-05
825	5.39875e-05	2.71795e-05	4.1325e-05	2.27609e-05	1.17577e-05	3.14021e-05
826	5.38767e-05	2.68559e-05	4.1143e-05	2.24644e-05	1.17577e-05	3.12195e-05
827	5.40429e-05	2.68559e-05	4.11885e-05	2.23902e-05	1.17577e-05	3.1247e-05
828	5.39875e-05	2.66618e-05	4.10064e-05	2.23161e-05	1.17577e-05	3.11459e-05
829	5.18258e-05	2.0514e-05	3.47713e-05	1.80901e-05	9.40614e-06	2.69215e-05
830	4.78904e-05	1.50134e-05	2.86727e-05	1.26779e-05	7.0546e-06	2.22618e-05
831	4.96087e-05	1.50781e-05	2.92643e-05	1.27521e-05	7.0546e-06	2.27516e-05
832	4.96641e-05	1.50781e-05	2.92188e-05	1.27521e-05	7.0546e-06	2.27535e-05
833	4.46755e-05	1.06129e-05	2.29381e-05	9.86061e-06	7.0546e-06	1.90283e-05
834	3.19823e-05	5.88888e-06	1.57927e-05	5.63463e-06	2.35153e-06	1.233e-05
835	3.58069e-05	5.9536e-06	1.67485e-05	5.93119e-06	2.35153e-06	1.33583e-05
836	3.60841e-05	5.88888e-06	1.6976e-05	5.93119e-06	2.35153e-06	1.34463e-05
837	3.57515e-05	5.75946e-06	1.66574e-05	5.85705e-06	2.35153e-06	1.32754e-05
838	3.56961e-05	5.75946e-06	1.65209e-05	5.85705e-06	2.35153e-06	1.3237e-05
839	3.29801e-05	4.91819e-06	1.36536e-05	4.89323e-06	2.35153e-06	1.17593e-05
840	2.24486e-05	3.04151e-06	7.8736e-06	3.18802e-06	2.35153e-06	7.78065e-06
841	3.44766e-05	4.9829e-06	1.40633e-05	4.07769e-06	2.35153e-06	1.19904e-05
842	3.54743e-05	4.91819e-06	1.41543e-05	4.37425e-06	2.35153e-06	1.22545e-05
843	3.54189e-05	4.91819e-06	1.44274e-05	4.52253e-06	2.35153e-06	1.23277e-05
844	3.51418e-05	4.4652e-06	1.44729e-05	4.30011e-06	2.35153e-06	1.21463e-05
845	3.0264e-05	3.04151e-06	1.22883e-05	3.48458e-06	7.83845e-07	9.97245e-06
846	3.49201e-05	4.01221e-06	1.5019e-05	5.48635e-06	7.83845e-07	1.20443e-05
847	3.36452e-05	3.94749e-06	1.45639e-05	5.18979e-06	7.83845e-07	1.1626e-05
848	4.70589e-05	7.442e-06	2.08901e-05	1.14175e-05	3.13538e-06	1.79888e-05
849	4.86109e-05	7.57142e-06	2.17093e-05	1.17141e-05	3.13538e-06	1.85482e-05
850	4.85555e-05	7.442e-06	2.13907e-05	1.164e-05	2.35153e-06	1.82759e-05
851	4.97749e-05	7.442e-06	2.15272e-05	1.18624e-05	2.35153e-06	1.85916e-05
852	4.81675e-05	7.24786e-06	2.12087e-05	1.18624e-05	2.35153e-06	1.81676e-05
853	5.47635e-05	9.51281e-06	2.53503e-05	1.47538e-05	2.35153e-06	2.13464e-05
854	5.48189e-05	9.4481e-06	2.53503e-05	1.47538e-05	2.35153e-06	2.13445e-05
855	5.49298e-05	9.4481e-06	2.54868e-05	1.4828e-05	2.35153e-06	2.14088e-05
856	5.49852e-05	9.4481e-06	2.54868e-05	1.4828e-05	2.35153e-06	2.14199e-05
857	5.45972e-05	9.4481e-06	2.55323e-05	1.4828e-05	2.35153e-06	2.13514e-05
858	5.45972e-05	9.4481e-06	2.55323e-05	1.4828e-05	2.35153e-06	2.13514e-05
859	5.45972e-05	9.4481e-06	2.54868e-05	1.4828e-05	2.35153e-06	2.13423e-05
860	5.35441e-05	9.38339e-06	2.49862e-05	1.47538e-05	2.35153e-06	2.10038e-05
861	5.03847e-05	8.54212e-06	2.30291e-05	1.44573e-05	2.35153e-06	1.9753e-05
862	5.26018e-05	8.93039e-06	2.37573e-05	1.4828e-05	3.13538e-06	2.06506e-05
863	5.24909e-05	8.86568e-06	2.37573e-05	1.4828e-05	3.13538e-06	2.06155e-05
864	5.22692e-05	8.86568e-06	2.36663e-05	1.47538e-05	3.13538e-06	2.05381e-05
865	5.22692e-05	8.86568e-06	2.36208e-05	1.47538e-05	3.13538e-06	2.0529e-05
866	5.18258e-05	8.67154e-06	2.34843e-05	1.47538e-05	3.13538e-06	2.03742e-05
867	3.44766e-05	4.52991e-06	1.14691e-05	6.67259e-06	2.35153e-06	1.18999e-05
868	3.47538e-05	4.65934e-06	1.17421e-05	6.74673e-06	2.35153e-06	1.20507e-05
869	3.44212e-05	4.59462e-06	1.18332e-05	6.82087e-06	2.35153e-06	1.20043e-05
870	3.42549e-05	4.59462e-06	1.18332e-05	6.82087e-06	2.35153e-06	1.1971e-05
871	2.84903e-05	4.20635e-06	9.19345e-06	5.70877e-06	1.56769e-06	9.83331e-06
872	2.83795e-05	4.14163e-06	9.19345e-06	5.63463e-06	1.56769e-06	9.78338e-06
873	2.68275e-05	3.81807e-06	8.51077e-06	5.26393e-06	1.56769e-06	9.19759e-06
874	1.60743e-05	1.61783e-06	5.50697e-06	2.74318e-06	1.56769e-06	5.50199e-06
875	1.58526e-05	1.55311e-06	5.37043e-06	2.74318e-06	1.56769e-06	5.4174e-06
876	1.22497e-05	1.29426e-06	4.23263e-06	1.92764e-06	1.56769e-06	4.25438e-06
877	1.29149e-05	1.42369e-06	4.46019e-06	1.8535e-06	1.56769e-06	4.44399e-06
878	1.25823e-05	1.29426e-06	4.41468e-06	1.77936e-06	1.56769e-06	4.32766e-06
879	1.10857e-05	1.22955e-06	3.732e-06	1.40866e-06	1.56769e-06	3.80472e-06
880	1.29149e-05	1.42369e-06	4.27814e-06	1.70522e-06	1.56769e-06	4.37793e-06
881	1.29149e-05	1.42369e-06	4.27814e-06	1.70522e-06	1.56769e-06	4.37793e-06
882	1.29149e-05	1.42369e-06	4.27814e-06	1.70522e-06	1.56769e-06	4.37793e-06
883	1.19172e-05	1.42369e-06	4.09609e-06	1.70522e-06	1.56769e-06	4.14198e-06
884	9.31202e-06	1.22955e-06	3.82302e-06	1.63108e-06	7.83845e-07	3.3559e-06
885	9.70002e-06	1.22955e-06	3.82302e-06	1.8535e-06	7.83845e-07	3.47799e-06
886	5.59829e-06	7.76556e-07	1.95702e-06	1.40866e-06	7.83845e-07	2.10487e-06
887	7.5383e-06	9.05982e-07	2.82175e-06	1.77936e-06	0	2.60908e-06
888	7.03944e-06	7.11843e-07	2.68522e-06	1.70522e-06	0	2.42834e-06
889	6.48515e-06	7.11843e-07	2.50317e-06	1.33452e-06	0	2.20694e-06
890	8.09258e-06	7.76556e-07	2.77624e-06	1.33452e-06	0	2.59598e-06
891	8.09258e-06	7.76556e-07	2.77624e-06	1.33452e-06	0	2.59598e-06
892	8.3143e-06	8.41269e-07	2.86727e-06	1.40866e-06	0	2.6863e-06
893	8.03716e-06	7.76556e-07	2.73073e-06	1.40866e-06	0	2.59062e-06
894	1.30812e-05	1.35897e-06	4.55121e-06	1.8535e-06	0	4.16898e-06
895	1.3192e-05	1.35897e-06	4.55121e-06	1.8535e-06	0	4.19114e-06
896	1.33029e-05	1.35897e-06	4.64224e-06	1.8535e-06	0	4.23152e-06
897	1.33583e-05	1.35897e-06	4.64224e-06	1.8535e-06	0	4.2426e-06
898	1.31366e-05	1.29426e-06	4.5057e-06	1.8535e-06	0	4.15801e-06
899	1.3192e-05	1.29426e-06	4.46019e-06	1.77936e-06	0	4.14516e-06
900	1.33029e-05	1.4884e-06	4.36917e-06	2.00178e-06	0	4.23245e-06
901	1.23052e-05	1.4884e-06	4.18712e-06	1.77936e-06	0	3.95202e-06
902	4.99967e-05	7.37728e-06	1.94792e-05	1.04537e-05	6.27076e-06	1.87155e-05
903	5.14932e-05	7.57142e-06	2.01164e-05	1.08986e-05	6.27076e-06	1.92701e-05
904	5.21029e-05	7.57142e-06	2.01619e-05	1.10468e-05	7.0546e-06	1.95875e-05
905	5.22138e-05	7.57142e-06	2.01164e-05	1.10468e-05	7.0546e-06	1.96006e-05
906	5.59829e-05	7.9597e-06	2.12997e-05	1.1121e-05	7.83845e-06	2.08404e-05
907	5.60938e-05	8.02441e-06	2.12087e-05	1.10468e-05	7.83845e-06	2.08424e-05
908	7.86533e-05	1.10012e-05	2.9947e-05	1.97954e-05	1.17577e-05	3.02309e-05
909	7.97064e-05	1.10012e-05	3.03566e-05	1.98695e-05	1.17577e-05	3.05383e-05
910	8.44733e-05	1.28132e-05	3.48168e-05	2.44662e-05	1.17577e-05	3.36654e-05
911	8.53047e-05	1.30073e-05	3.54995e-05	2.4911e-05	1.17577e-05	3.4096e-05
912	8.56373e-05	1.3072e-05	3.54995e-05	2.50593e-05	1.17577e-05	3.42052e-05
913	8.40298e-05	1.28779e-05	3.47258e-05	2.4911e-05	1.17577e-05	3.36604e-05
914	0.00011252	3.48156e-05	6.22151e-05	5.36031e-05	1.88123e-05	5.63932e-05
915	0.000115901	3.68864e-05	6.65843e-05	5.84964e-05	1.95961e-05	5.94928e-05
916	0.000116511	3.74041e-05	6.76311e-05	5.94602e-05	1.95961e-05	6.01205e-05
917	0.000118008	3.85042e-05	6.9133e-05	6.07206e-05	1.95961e-05	6.11924e-05
918	0.000117952	3.86337e-05	6.91785e-05	6.0943e-05	1.95961e-05	6.12607e-05
919	0.000115458	3.83101e-05	6.81317e-05	6.10913e-05	1.95961e-05	6.05174e-05
920	0.000141232	4.08339e-05	7.97373e-05	6.58362e-05	2.038e-05	6.96039e-05
921	0.0001455	4.1481e-05	8.18308e-05	6.62069e-05	2.038e-05	7.10797e-05
922	0.000140955	3.99279e-05	7.88726e-05	6.34638e-05	1.95961e-05	6.85631e-05
923	0.000195552	5.57826e-05	0.000114736	7.56968e-05	2.35153e-05	9.30565e-05
924	0.000198047	5.62356e-05	0.000116101	7.59934e-05	2.35153e-05	9.39785e-05
925	0.00020043	5.68827e-05	0.000117512	7.61417e-05	2.35153e-05	9.48963e-05
926	0.000200929	5.69474e-05	0.000117649	7.61417e-05	2.35153e-05	9.50365e-05
927	0.000200818	5.66239e-05	0.000117194	7.56968e-05	2.35153e-05	9.47696e-05
928	0.000201428	5.66239e-05	0.000117512	7.56968e-05	2.35153e-05	9.49552e-05
929	0.000201206	5.65592e-05	0.000117512	7.55486e-05	2.35153e-05	9.48682e-05
930	0.00020043	5.64297e-05	0.000116966	7.4733e-05	2.35153e-05	9.44148e-05
931	0.000200153	5.6365e-05	0.000116739	7.41399e-05	2.35153e-05	9.41824e-05
932	0.000199876	5.62356e-05	0.000116739	7.39916e-05	2.35153e-05	9.40715e-05
933	0.000199654	5.5912e-05	0.000115965	7.29537e-05	2.27315e-05	9.34432e-05
934	0.000194555	5.18351e-05	0.000110412	6.62069e-05	1.95961e-05	8.8521e-05
935	0.000192337	4.97643e-05	0.0001075	6.25741e-05	1.72446e-05	8.5884e-05
936	0.00018818	4.69816e-05	0.000102721	5.75326e-05	1.33254e-05	8.17481e-05
937	0.000172328	3.6304e-05	8.64731e-05	4.26304e-05	1.17577e-05	6.98986e-05
938	0.000133417	2.30378e-05	6.22151e-05	2.18713e-05	4.70307e-06	4.90489e-05
939	0.000152484	2.86679e-05	7.50495e-05	2.8099e-05	1.33254e-05	5.95252e-05
940	0.000152595	2.86679e-05	7.51861e-05	2.8099e-05	1.33254e-05	5.95747e-05
941	0.000151099	2.78913e-05	7.41848e-05	2.758e-05	1.41092e-05	5.89729e-05
942	0.000149048	2.705e-05	7.13631e-05	2.72835e-05	1.41092e-05	5.77708e-05
943	0.000122442	1.86373e-05	5.22935e-05	2.07592e-05	1.33254e-05	4.54915e-05
944	0.000130091	2.39438e-05	5.98485e-05	2.60231e-05	1.56769e-05	5.11167e-05
945	0.000129592	2.38791e-05	5.9803e-05	2.58007e-05	1.56769e-05	5.09503e-05
946	0.00012671	2.36202e-05	5.85286e-05	2.46886e-05	1.4893e-05	4.96881e-05
947	0.000127541	2.39438e-05	5.88017e-05	2.47627e-05	1.4893e-05	4.99884e-05
948	0.000124825	2.38144e-05	5.74818e-05	2.43179e-05	1.4893e-05	4.90664e-05
949	7.89858e-05	1.65018e-05	3.75475e-05	1.77194e-05	1.33254e-05	3.2816e-05
950	8.25333e-05	1.70195e-05	3.87308e-05	1.86833e-05	1.41092e-05	3.42152e-05
951	8.23116e-05	1.69548e-05	3.85488e-05	1.86091e-05	1.41092e-05	3.41067e-05
952	6.17475e-05	1.45604e-05	3.04021e-05	1.73487e-05	1.33254e-05	2.74768e-05
953	6.2967e-05	1.46899e-05	3.08117e-05	1.81643e-05	1.33254e-05	2.79917e-05
954	6.23018e-05	1.46899e-05	3.08117e-05	1.82384e-05	1.33254e-05	2.78734e-05
955	6.1415e-05	1.46251e-05	3.07207e-05	1.82384e-05	1.33254e-05	2.76649e-05
956	5.77567e-05	1.43663e-05	3.03111e-05	1.77936e-05	1.33254e-05	2.67106e-05
957	5.97521e-05	1.47546e-05	3.06297e-05	1.8535e-05	1.33254e-05	2.73994e-05
958	5.88098e-05	1.43663e-05	2.95829e-05	1.76453e-05	1.33254e-05	2.67459e-05
959	5.93641e-05	1.43663e-05	2.95829e-05	1.77194e-05	1.33254e-05	2.68716e-05
960	5.76458e-05	1.3978e-05	2.89457e-05	1.73487e-05	1.25415e-05	2.60919e-05
961	5.57058e-05	1.34603e-05	2.70342e-05	1.63108e-05	1.09738e-05	2.4697e-05
962	5.24909e-05	1.18425e-05	2.38939e-05	1.4828e-05	7.83845e-06	2.21788e-05
963	3.95761e-05	6.21245e-06	1.31985e-05	9.19335e-06	3.13538e-06	1.42632e-05
964	2.49983e-05	3.88278e-06	7.73707e-06	5.93119e-06	2.35153e-06	8.98017e-06
965	2.74372e-05	4.01221e-06	8.32872e-06	6.15361e-06	3.13538e-06	9.81342e-06
966	2.73818e-05	3.94749e-06	8.46526e-06	6.15361e-06	3.13538e-06	9.81671e-06
967	2.0176e-05	2.58852e-06	6.3717e-06	5.18979e-06	1.56769e-06	7.17874e-06
968	2.61623e-05	3.30036e-06	9.87614e-06	6.37603e-06	1.56769e-06	9.4565e-06
969	2.6384e-05	3.42979e-06	1.00582e-05	6.59845e-06	1.56769e-06	9.60763e-06
970	2.03977e-05	2.65323e-06	7.8736e-06	4.81909e-06	7.83845e-07	7.30549e-06
971	2.55526e-05	4.07692e-06	1.16056e-05	6.30189e-06	1.56769e-06	9.82094e-06
972	2.59406e-05	4.33577e-06	1.18332e-05	6.30189e-06	1.56769e-06	9.99583e-06
973	2.53863e-05	4.52991e-06	1.18787e-05	6.22775e-06	1.56769e-06	9.91807e-06
974	3.24812e-05	9.70695e-06	1.90241e-05	9.41577e-06	2.35153e-06	1.45959e-05
975	3.26475e-05	9.9658e-06	1.93882e-05	9.78647e-06	2.35153e-06	1.48279e-05
976	3.29246e-05	1.03541e-05	2.00709e-05	1.0083e-05	2.35153e-06	1.51568e-05
977	3.29246e-05	1.03541e-05	2.02074e-05	1.0083e-05	2.35153e-06	1.51841e-05
978	3.29246e-05	1.04188e-05	2.02074e-05	1.0083e-05	2.35153e-06	1.51971e-05
979	3.29246e-05	1.04188e-05	2.01619e-05	1.0083e-05	2.35153e-06	1.5188e-05
980	3.29246e-05	1.04188e-05	2.01619e-05	1.0083e-05	2.35153e-06	1.5188e-05
981	3.29246e-05	1.04188e-05	2.01619e-05	1.0083e-05	2.35153e-06	1.5188e-05
982	3.27583e-05	1.02247e-05	2.00709e-05	1.00089e-05	2.35153e-06	1.50829e-05
983	3.22041e-05	1.01599e-05	1.98888e-05	1.00089e-05	2.35153e-06	1.49226e-05
984	3.22595e-05	1.02247e-05	1.98888e-05	1.00089e-05	2.35153e-06	1.49467e-05
985	3.19269e-05	1.02247e-05	1.97978e-05	9.93475e-06	2.35153e-06	1.48471e-05
986	3.12063e-05	1.02247e-05	1.96612e-05	9.71233e-06	2.35153e-06	1.46312e-05
987	3.03195e-05	1.01599e-05	1.93882e-05	9.34163e-06	2.35153e-06	1.43122e-05
988	2.72155e-05	9.64224e-06	1.82959e-05	8.52609e-06	2.35153e-06	1.32063e-05
989	2.72709e-05	9.70695e-06	1.82959e-05	8.52609e-06	2.35153e-06	1.32303e-05
990	2.43332e-05	9.18925e-06	1.70671e-05	7.63641e-06	2.35153e-06	1.21155e-05
991	2.31692e-05	8.67154e-06	1.63844e-05	7.11743e-06	2.35153e-06	1.15388e-05
992	2.31692e-05	8.67154e-06	1.63844e-05	7.04329e-06	2.35153e-06	1.1524e-05
993	2.25595e-05	8.54212e-06	1.60658e-05	6.82087e-06	2.35153e-06	1.1268e-05
994	2.22269e-05	8.4774e-06	1.58382e-05	6.67259e-06	2.35153e-06	1.11133e-05
995	1.75709e-05	6.14774e-06	1.16511e-05	5.56049e-06	1.56769e-06	8.49958e-06
996	1.54646e-05	4.59462e-06	9.46653e-06	3.78113e-06	7.83845e-07	6.81815e-06
997	7.26115e-06	2.26496e-06	3.91404e-06	1.4828e-06	7.83845e-07	3.14136e-06
998	9.64459e-06	2.39438e-06	4.23263e-06	1.77936e-06	0	3.61019e-06
999	9.75544e-06	2.32967e-06	4.18712e-06	1.8535e-06	0	3.62515e-06
1000	9.64459e-06	2.26496e-06	3.95956e-06	1.8535e-06	0	3.54452e-06
1001	6.7623e-06	6.4713e-07	1.27434e-06	5.18979e-07	0	1.84055e-06
1002	8.7023e-06	7.76556e-07	1.77497e-06	5.18979e-07	0	2.35456e-06
1003	8.36973e-06	7.11843e-07	1.68395e-06	5.18979e-07	0	2.2569e-06
1004	7.64916e-06	5.82417e-07	1.72946e-06	4.44839e-07	0	2.08118e-06
1005	9.25659e-06	5.82417e-07	2.00253e-06	6.67259e-07	0	2.50176e-06
1006	9.42287e-06	5.17704e-07	1.95702e-06	6.67259e-07	0	2.51297e-06
1007	9.70002e-06	5.17704e-07	2.04805e-06	8.15539e-07	0	2.61626e-06
1008	9.58916e-06	5.82417e-07	2.00253e-06	8.15539e-07	0	2.59793e-06
1009	8.64687e-06	5.17704e-07	1.72946e-06	8.15539e-07	0	2.34191e-06
1010	9.64459e-06	7.11843e-07	1.72946e-06	8.89679e-07	0	2.59511e-06
1011	9.75544e-06	7.11843e-07	1.72946e-06	8.89679e-07	0	2.61728e-06
1012	9.75544e-06	7.11843e-07	1.72946e-06	8.89679e-07	0	2.61728e-06
1013	9.25659e-06	5.82417e-07	1.59293e-06	8.89679e-07	0	2.46432e-06
1014	1.10857e-05	6.4713e-07	1.95702e-06	1.03796e-06	0	2.94556e-06
1015	1.10303e-05	6.4713e-07	1.866e-06	1.03796e-06	0	2.91628e-06
1016	1.73492e-05	1.55311e-06	3.77751e-06	1.77936e-06	0	4.89184e-06
1017	1.75155e-05	1.61783e-06	3.82302e-06	1.77936e-06	0	4.94714e-06
1018	1.76263e-05	1.61783e-06	3.77751e-06	1.77936e-06	0	4.9602e-06
1019	1.79589e-05	1.61783e-06	3.95956e-06	2.00178e-06	0	5.10761e-06
1020	1.79589e-05	1.61783e-06	3.95956e-06	2.00178e-06	0	5.10761e-06
1021	1.79589e-05	1.61783e-06	3.95956e-06	2.00178e-06	0	5.10761e-06
1022	1.7848e-05	1.61783e-06	3.95956e-06	1.92764e-06	0	5.07061e-06
1023	1.7848e-05	1.61783e-06	3.95956e-06	1.92764e-06	0	5.07061e-06
1024	1.77926e-05	1.61783e-06	3.95956e-06	1.8535e-06	0	5.0447e-06
1025	1.76817e-05	1.55311e-06	3.95956e-06	1.8535e-06	0	5.00957e-06
1026	1.55755e-05	1.42369e-06	3.18585e-06	1.77936e-06	0	4.39288e-06
1027	1.57972e-05	1.42369e-06	3.18585e-06	1.77936e-06	1.56769e-06	4.75076e-06
1028	1.5132e-05	1.35897e-06	3.09483e-06	1.63108e-06	1.56769e-06	4.55691e-06
1029	1.25823e-05	1.29426e-06	2.86727e-06	1.26038e-06	1.56769e-06	3.91438e-06
1030	1.54092e-05	1.61783e-06	3.27687e-06	1.4828e-06	1.56769e-06	4.67088e-06
1031	1.54092e-05	1.61783e-06	3.27687e-06	1.4828e-06	1.56769e-06	4.67088e-06
1032	1.54092e-05	1.61783e-06	3.27687e-06	1.4828e-06	1.56769e-06	4.67088e-06
1033	1.46332e-05	1.55311e-06	3.09483e-06	1.33452e-06	1.56769e-06	4.43667e-06
1034	1.52429e-05	2.07082e-06	3.732e-06	1.40866e-06	1.56769e-06	4.80441e-06
1035	1.51875e-05	2.07082e-06	3.732e-06	1.40866e-06	1.56769e-06	4.79333e-06
1036	1.48549e-05	2.0061e-06	3.45892e-06	1.33452e-06	1.56769e-06	4.64443e-06
1037	1.33583e-05	1.74725e-06	3.14034e-06	1.1121e-06	1.56769e-06	4.18514e-06
1038	1.47995e-05	1.68254e-06	3.45892e-06	1.18624e-06	1.56769e-06	4.53898e-06
1039	1.45223e-05	1.61783e-06	3.04931e-06	1.1121e-06	1.56769e-06	4.37385e-06
1040	1.46886e-05	1.68254e-06	3.18585e-06	1.18624e-06	1.56769e-06	4.46218e-06
1041	1.01434e-05	1.42369e-06	2.00253e-06	7.41399e-07	1.56769e-06	3.17574e-06
1042	1.76817e-05	2.84737e-06	5.05185e-06	3.41044e-06	2.35153e-06	6.26858e-06
1043	1.80697e-05	2.91209e-06	5.2339e-06	3.3363e-06	2.35153e-06	6.3807e-06
1044	1.82915e-05	2.9768e-06	5.32492e-06	3.41044e-06	2.35153e-06	6.47104e-06
1045	1.77372e-05	2.91209e-06	5.2339e-06	3.3363e-06	2.35153e-06	6.3142e-06
1046	1.96217e-05	3.75335e-06	6.46273e-06	4.07769e-06	3.13538e-06	7.41017e-06
1047	2.00097e-05	4.01221e-06	6.91785e-06	4.07769e-06	3.91922e-06	7.78733e-06
1048	1.91229e-05	3.81807e-06	7.00887e-06	4.67081e-06	7.0546e-06	8.33505e-06
1049	5.82001e-05	1.52076e-05	2.8263e-05	2.46886e-05	2.19477e-05	2.96614e-05
1050	5.97521e-05	1.54664e-05	3.02201e-05	2.52076e-05	2.19477e-05	3.05188e-05
1051	6.00847e-05	1.55311e-05	3.03111e-05	2.52817e-05	2.19477e-05	3.06313e-05
1052	6.00847e-05	1.55311e-05	3.04021e-05	2.52817e-05	2.19477e-05	3.06495e-05
1053	5.99184e-05	1.55311e-05	3.04021e-05	2.53558e-05	2.19477e-05	3.0631e-05
1054	6.0251e-05	1.55311e-05	3.04476e-05	2.53558e-05	2.19477e-05	3.07066e-05
1055	6.0251e-05	1.54664e-05	3.04476e-05	2.53558e-05	2.19477e-05	3.06937e-05
1056	6.0251e-05	1.54664e-05	3.04476e-05	2.543e-05	2.19477e-05	3.07085e-05
1057	5.96412e-05	1.52076e-05	3.00835e-05	2.53558e-05	2.19477e-05	3.04472e-05
1058	5.91978e-05	1.5337e-05	3.0038e-05	2.53558e-05	2.19477e-05	3.03753e-05
1059	6.31332e-05	1.56605e-05	3.14489e-05	2.64679e-05	2.35153e-05	3.20452e-05
1060	6.32441e-05	1.57253e-05	3.14034e-05	2.65421e-05	2.35153e-05	3.2086e-05
1061	6.23018e-05	1.54017e-05	3.15854e-05	2.66162e-05	2.35153e-05	3.18841e-05
1062	0.000105924	2.7503e-05	5.31582e-05	4.9303e-05	3.91922e-05	5.50161e-05
1063	0.000112576	3.04151e-05	5.8028e-05	5.54566e-05	4.5463e-05	6.03877e-05
1064	0.000112908	3.0674e-05	5.83921e-05	5.63463e-05	4.5463e-05	6.07567e-05
1065	0.000148272	5.37765e-05	9.02506e-05	9.40835e-05	8.70068e-05	9.46779e-05
1066	0.000152318	5.59767e-05	9.39371e-05	9.82354e-05	9.01421e-05	9.81219e-05
1067	0.000152595	5.60415e-05	9.39371e-05	9.83836e-05	9.01421e-05	9.82199e-05
1068	0.000152928	5.63003e-05	9.43012e-05	9.86802e-05	9.0926e-05	9.86271e-05
1069	0.000152983	5.62356e-05	9.43012e-05	9.81612e-05	9.01421e-05	9.83646e-05
1070	0.000153039	5.62356e-05	9.43467e-05	9.81612e-05	9.01421e-05	9.83849e-05
1071	0.000152928	5.61062e-05	9.43467e-05	9.80129e-05	9.01421e-05	9.83072e-05
1072	0.000151376	5.48766e-05	9.25717e-05	9.69008e-05	8.93583e-05	9.70167e-05
1073	0.000151154	5.42942e-05	9.23442e-05	9.58629e-05	8.85744e-05	9.64459e-05
1074	0.000151487	5.42942e-05	9.20256e-05	9.57146e-05	8.85744e-05	9.64192e-05
1075	0.000143505	5.15763e-05	8.66551e-05	9.17111e-05	8.54391e-05	9.17773e-05
1076	0.000155921	5.52002e-05	9.71684e-05	9.71974e-05	8.85744e-05	9.88123e-05
1077	0.000156309	5.49413e-05	9.7214e-05	9.6975e-05	8.85744e-05	9.88027e-05
1078	0.000156808	5.50061e-05	9.75325e-05	9.70491e-05	8.77906e-05	9.88373e-05
1079	0.000157307	5.51355e-05	9.80787e-05	9.69008e-05	8.70068e-05	9.88858e-05
1080	0.000153759	5.35177e-05	9.57121e-05	9.4306e-05	8.46552e-05	9.639e-05
1081	0.000155422	5.39706e-05	9.65768e-05	9.34163e-05	8.46552e-05	9.68082e-05
1082	0.000155145	5.39059e-05	9.66678e-05	9.30456e-05	8.46552e-05	9.66839e-05
1083	0.00015448	5.35177e-05	9.60761e-05	9.20076e-05	8.46552e-05	9.61473e-05
1084	0.000153925	5.31941e-05	9.52569e-05	9.06731e-05	8.46552e-05	9.55409e-05
1085	0.000121001	3.45567e-05	6.89054e-05	5.4048e-05	5.40853e-05	6.65193e-05
1086	0.000132585	3.71453e-05	7.5095e-05	5.75326e-05	5.48691e-05	7.14454e-05
1087	0.000132474	3.66923e-05	7.47765e-05	5.70877e-05	5.48691e-05	7.11799e-05
1088	0.000132696	3.66923e-05	7.46399e-05	5.71619e-05	5.48691e-05	7.12118e-05
1089	0.00012998	3.44273e-05	7.25919e-05	5.31583e-05	5.09499e-05	6.82215e-05
1090	0.000121167	2.53028e-05	6.22606e-05	4.3446e-05	3.37053e-05	5.71763e-05
1091	0.000121666	2.51086e-05	6.25337e-05	4.24822e-05	3.29215e-05	5.69424e-05
1092	9.1291e-05	1.41074e-05	4.32821e-05	2.29092e-05	9.40614e-06	3.61992e-05
1093	9.38962e-05	1.52076e-05	4.53301e-05	2.37989e-05	1.019e-05	3.76846e-05
1094	9.20116e-05	1.50134e-05	4.42833e-05	2.29834e-05	1.019e-05	3.68963e-05
1095	8.47504e-05	1.43663e-05	4.08244e-05	2.00178e-05	7.0546e-06	3.34027e-05
1096	5.99738e-05	1.17778e-05	3.14489e-05	1.49021e-05	4.70307e-06	2.45611e-05
1097	6.79001e-05	1.28779e-05	3.51354e-05	1.57918e-05	4.70307e-06	2.72817e-05
1098	6.79001e-05	1.28132e-05	3.51809e-05	1.57918e-05	4.70307e-06	2.72778e-05
1099	5.74795e-05	1.01599e-05	2.66246e-05	1.18624e-05	3.91922e-06	2.20091e-05
1100	5.78121e-05	9.9658e-06	2.62605e-05	1.14175e-05	3.91922e-06	2.1875e-05
1101	5.04401e-05	8.54212e-06	2.23465e-05	9.26749e-06	3.91922e-06	1.89031e-05
1102	5.26572e-05	8.86568e-06	2.32112e-05	9.78647e-06	4.70307e-06	1.98447e-05
1103	5.24355e-05	8.80097e-06	2.30747e-05	9.71233e-06	4.70307e-06	1.97453e-05
1104	5.29898e-05	8.93039e-06	2.34388e-05	9.71233e-06	4.70307e-06	1.99549e-05
1105	4.81675e-05	7.83027e-06	2.01164e-05	7.71055e-06	3.13538e-06	1.7392e-05
1106	5.48189e-05	1.05482e-05	2.65791e-05	8.82265e-06	3.13538e-06	2.07808e-05
1107	5.48189e-05	1.05482e-05	2.65791e-05	8.74851e-06	3.13538e-06	2.0766e-05
1108	5.47635e-05	1.05482e-05	2.64881e-05	8.67437e-06	3.13538e-06	2.07219e-05
1109	5.46527e-05	1.05482e-05	2.64881e-05	8.52609e-06	3.13538e-06	2.06701e-05
1110	5.11052e-05	8.54212e-06	2.29381e-05	6.22775e-06	3.13538e-06	1.83897e-05
1111	4.88327e-05	7.83027e-06	2.21644e-05	5.93119e-06	3.13538e-06	1.75788e-05
1112	2.90446e-05	5.37118e-06	1.44274e-05	4.07769e-06	7.83845e-07	1.07409e-05
1113	3.79686e-05	9.18925e-06	1.93882e-05	6.52431e-06	7.83845e-07	1.47708e-05
1114	3.85229e-05	9.64224e-06	2.00709e-05	6.74673e-06	7.83845e-07	1.51533e-05
1115	3.84675e-05	1.09365e-05	2.2392e-05	7.78469e-06	7.83845e-07	1.60729e-05
1116	4.63384e-05	1.32662e-05	2.68067e-05	8.82265e-06	2.35153e-06	1.95171e-05
1117	4.24584e-05	1.28132e-05	2.48041e-05	7.93297e-06	2.35153e-06	1.8072e-05
1118	5.99738e-05	1.87668e-05	3.40886e-05	1.5347e-05	7.83845e-06	2.72029e-05
1119	5.94195e-05	1.87668e-05	3.41796e-05	1.52728e-05	7.83845e-06	2.70954e-05
1120	6.24127e-05	1.94786e-05	3.52719e-05	1.63108e-05	8.62229e-06	2.84193e-05
1121	8.63579e-05	3.13858e-05	5.70722e-05	2.77283e-05	2.5083e-05	4.55254e-05
1122	8.69676e-05	3.15799e-05	5.75274e-05	2.79507e-05	2.5083e-05	4.58217e-05
1123	8.7411e-05	3.15152e-05	5.8028e-05	2.81732e-05	2.5083e-05	4.60421e-05
1124	8.77436e-05	3.15152e-05	5.8028e-05	2.81732e-05	2.5083e-05	4.61086e-05
1125	8.69676e-05	3.11917e-05	5.69812e-05	2.83956e-05	2.5083e-05	4.57238e-05
1126	0.000101933	4.847e-05	7.36842e-05	4.52995e-05	3.21376e-05	6.03049e-05
1127	0.000102709	5.0282e-05	7.50495e-05	4.64857e-05	3.29215e-05	6.14895e-05
1128	0.000106146	5.38412e-05	7.94642e-05	5.086e-05	3.37053e-05	6.48033e-05
1129	0.00010537	5.48766e-05	7.96918e-05	5.24169e-05	3.37053e-05	6.52121e-05
1130	0.000114959	6.45836e-05	9.06602e-05	6.12396e-05	3.68407e-05	7.36566e-05
1131	0.000116234	6.58131e-05	9.32089e-05	6.30189e-05	3.84084e-05	7.53367e-05
1132	0.000116068	6.58778e-05	9.30268e-05	6.30931e-05	3.84084e-05	7.52948e-05
1133	0.000116234	6.59425e-05	9.32999e-05	6.30931e-05	3.84084e-05	7.53956e-05
1134	0.000116289	6.58778e-05	9.31634e-05	6.30189e-05	3.84084e-05	7.53515e-05
1135	0.000116178	6.56837e-05	9.31634e-05	6.29448e-05	3.84084e-05	7.52757e-05
1136	0.000116178	6.54248e-05	9.30723e-05	6.27965e-05	3.84084e-05	7.5176e-05
1137	0.000112409	6.18656e-05	8.74744e-05	5.93119e-05	3.5273e-05	7.12668e-05
1138	0.000107753	6.05067e-05	8.48346e-05	5.84222e-05	3.44892e-05	6.92011e-05
1139	0.0001215	7.84969e-05	0.000100991	7.58451e-05	5.17337e-05	8.57133e-05
1140	0.000123052	8.26385e-05	0.00010577	8.14056e-05	5.48691e-05	8.9547e-05
1141	0.000123107	8.28326e-05	0.000105952	8.15539e-05	5.48691e-05	8.96629e-05
1142	0.000122719	8.32209e-05	0.000105998	8.15539e-05	5.48691e-05	8.96722e-05
1143	0.000122664	8.36739e-05	0.000105907	8.15539e-05	5.48691e-05	8.97336e-05
1144	0.000122497	8.38033e-05	0.000106089	8.12573e-05	5.40853e-05	8.95464e-05
1145	0.000120003	8.20561e-05	0.000103586	7.86624e-05	5.33014e-05	8.75218e-05
1146	0.000119061	8.14737e-05	0.000103131	7.80693e-05	5.33014e-05	8.70073e-05
1147	0.000118008	7.90793e-05	0.000100809	7.58451e-05	5.33014e-05	8.54086e-05
1148	9.47276e-05	5.7271e-05	7.63239e-05	5.68653e-05	4.23276e-05	6.55031e-05
1149	9.50602e-05	5.83064e-05	7.77348e-05	5.6717e-05	4.23276e-05	6.60292e-05
1150	9.45613e-05	5.79181e-05	7.72796e-05	5.59015e-05	4.23276e-05	6.55976e-05
1151	6.81773e-05	4.44578e-05	5.89837e-05	4.10735e-05	3.44892e-05	4.94363e-05
1152	6.92304e-05	4.45225e-05	5.92113e-05	4.12218e-05	3.44892e-05	4.9735e-05
1153	6.35767e-05	4.34871e-05	5.69357e-05	4.00355e-05	3.05699e-05	4.6921e-05
1154	6.7235e-05	4.3293e-05	5.71633e-05	3.99614e-05	3.05699e-05	4.76445e-05
1155	6.7235e-05	4.32283e-05	5.70267e-05	3.99614e-05	3.05699e-05	4.76043e-05
1156	6.31332e-05	4.17399e-05	5.45691e-05	3.91459e-05	3.05699e-05	4.58316e-05
1157	6.65698e-05	4.18693e-05	5.58434e-05	3.96648e-05	3.13538e-05	4.70602e-05
1158	6.65698e-05	4.18693e-05	5.57979e-05	3.96648e-05	3.13538e-05	4.70511e-05
1159	6.61264e-05	4.15457e-05	5.54338e-05	3.8701e-05	2.97861e-05	4.63186e-05
1160	6.58492e-05	4.13516e-05	5.48877e-05	3.78855e-05	2.82184e-05	4.56385e-05
1161	6.59047e-05	4.12222e-05	5.48877e-05	3.78113e-05	2.82184e-05	4.56089e-05
1162	6.23572e-05	3.92161e-05	5.22479e-05	3.57354e-05	2.82184e-05	4.3555e-05
1163	3.37561e-05	7.18314e-06	1.66119e-05	6.96915e-06	1.17577e-05	1.52556e-05
1164	3.44212e-05	6.989e-06	1.62478e-05	7.11743e-06	1.09738e-05	1.51498e-05
1165	3.00423e-05	5.9536e-06	1.31985e-05	4.96737e-06	9.40614e-06	1.27136e-05
1166	2.0564e-05	4.72405e-06	9.60306e-06	3.85527e-06	4.70307e-06	8.68989e-06
1167	2.40006e-05	5.37118e-06	1.08774e-05	4.74495e-06	4.70307e-06	9.93944e-06
1168	2.4056e-05	5.24175e-06	1.06954e-05	4.67081e-06	4.70307e-06	9.87341e-06
1169	2.16726e-05	2.58852e-06	6.78131e-06	3.41044e-06	1.56769e-06	7.20411e-06
1170	2.43332e-05	2.9768e-06	7.8736e-06	3.92941e-06	1.56769e-06	8.13614e-06
1171	2.42778e-05	3.04151e-06	7.82809e-06	3.92941e-06	1.56769e-06	8.1289e-06
1172	2.46658e-05	3.04151e-06	8.2377e-06	3.92941e-06	1.56769e-06	8.28842e-06
1173	2.51092e-05	3.04151e-06	8.73833e-06	4.07769e-06	1.56769e-06	8.50688e-06
1174	2.50538e-05	3.23565e-06	9.01141e-06	4.37425e-06	1.56769e-06	8.64856e-06
1175	2.43332e-05	3.10622e-06	8.69282e-06	4.22597e-06	1.56769e-06	8.38518e-06
1176	1.85686e-05	2.52381e-06	6.69029e-06	3.26216e-06	1.56769e-06	6.52251e-06
1177	2.134e-05	2.78266e-06	7.28194e-06	3.92941e-06	7.83845e-07	7.22357e-06
1178	2.15063e-05	2.78266e-06	7.32746e-06	3.92941e-06	7.83845e-07	7.26594e-06
1179	2.16726e-05	2.78266e-06	7.32746e-06	4.00355e-06	7.83845e-07	7.31402e-06
1180	2.15617e-05	2.78266e-06	7.32746e-06	4.00355e-06	7.83845e-07	7.29184e-06
1181	2.15617e-05	2.78266e-06	7.32746e-06	4.00355e-06	7.83845e-07	7.29184e-06
1182	1.57972e-05	2.39438e-06	6.09863e-06	3.78113e-06	7.83845e-07	5.77104e-06
1183	1.65177e-05	2.45909e-06	6.41721e-06	3.92941e-06	0	5.86468e-06
1184	1.65177e-05	2.45909e-06	6.32619e-06	3.92941e-06	0	5.84648e-06
1185	1.65177e-05	2.45909e-06	6.32619e-06	3.92941e-06	0	5.84648e-06
1186	1.41897e-05	1.68254e-06	5.32492e-06	3.41044e-06	0	4.92152e-06
1187	1.46886e-05	1.68254e-06	5.46146e-06	3.55872e-06	0	5.07826e-06
1188	1.46886e-05	1.68254e-06	5.46146e-06	3.55872e-06	0	5.07826e-06
1189	1.46886e-05	1.68254e-06	5.46146e-06	3.48458e-06	0	5.06344e-06
1190	1.4744e-05	1.68254e-06	5.50697e-06	3.48458e-06	0	5.08362e-06
1191	1.37463e-05	1.16483e-06	4.96082e-06	3.3363e-06	0	4.64165e-06
1192	1.36909e-05	1.16483e-06	4.96082e-06	3.3363e-06	0	4.63057e-06
1193	1.34692e-05	1.16483e-06	4.8698e-06	3.26216e-06	0	4.5532e-06
1194	1.34692e-05	1.16483e-06	4.91531e-06	3.26216e-06	0	4.5623e-06
1195	1.11966e-05	8.41269e-07	3.09483e-06	2.37248e-06	0	3.50104e-06
1196	1.0864e-05	8.41269e-07	2.82175e-06	2.29834e-06	0	3.36507e-06
1197	1.07532e-05	8.41269e-07	2.82175e-06	2.2242e-06	0	3.32808e-06
1198	2.66058e-06	2.58852e-07	7.73707e-07	6.67259e-07	0	8.7208e-07
1199	3.15943e-06	3.23565e-07	8.19219e-07	8.15539e-07	0	1.02355e-06
1200	2.38343e-06	2.58852e-07	7.28194e-07	6.67259e-07	0	8.07547e-07
1201	3.54743e-06	6.4713e-07	1.09229e-06	8.15539e-07	0	1.22048e-06
1202	4.10172e-06	8.41269e-07	1.41088e-06	9.63819e-07	0	1.46354e-06
1203	1.06423e-05	2.45909e-06	5.18839e-06	2.29834e-06	0	4.11762e-06
1204	1.11412e-05	2.52381e-06	5.37043e-06	2.37248e-06	0	4.28158e-06
1205	1.11966e-05	2.52381e-06	5.37043e-06	2.37248e-06	0	4.29266e-06
1206	1.17509e-05	2.58852e-06	5.68902e-06	2.44662e-06	0	4.49501e-06
1207	1.19172e-05	2.91209e-06	5.82556e-06	2.52076e-06	0	4.63512e-06
1208	1.49103e-05	4.01221e-06	7.23643e-06	3.18802e-06	0	5.86939e-06
1209	1.51875e-05	4.07692e-06	7.46399e-06	3.18802e-06	0	5.98329e-06
1210	1.552e-05	4.14163e-06	7.69155e-06	3.41044e-06	0	6.15272e-06
1211	1.57972e-05	4.14163e-06	7.73707e-06	3.3363e-06	0	6.20244e-06
1212	1.746e-05	4.27106e-06	8.37424e-06	3.3363e-06	7.83845e-07	6.84509e-06
1213	1.746e-05	4.27106e-06	8.37424e-06	3.3363e-06	7.83845e-07	6.84509e-06
1214	1.70166e-05	4.27106e-06	8.14667e-06	3.3363e-06	7.83845e-07	6.7109e-06
1215	1.69612e-05	4.27106e-06	8.10116e-06	3.26216e-06	7.83845e-07	6.67589e-06
1216	1.69057e-05	4.27106e-06	8.05565e-06	3.26216e-06	7.83845e-07	6.65568e-06
1217	1.76263e-05	4.33577e-06	8.46526e-06	3.41044e-06	7.83845e-07	6.92432e-06
1218	1.76263e-05	4.33577e-06	8.51077e-06	3.41044e-06	7.83845e-07	6.93343e-06
1219	1.74046e-05	4.27106e-06	8.46526e-06	3.26216e-06	7.83845e-07	6.83739e-06
1220	2.79915e-05	8.80097e-06	2.03439e-05	6.15361e-06	1.56769e-06	1.29715e-05
1221	2.81578e-05	8.80097e-06	2.0435e-05	6.22775e-06	1.56769e-06	1.30378e-05
1222	2.80469e-05	8.73626e-06	2.02984e-05	6.15361e-06	1.56769e-06	1.29606e-05
1223	2.81578e-05	8.73626e-06	2.04805e-05	6.22775e-06	1.56769e-06	1.3034e-05
1224	2.79915e-05	8.60683e-06	2.02074e-05	6.22775e-06	1.56769e-06	1.29202e-05
1225	2.79915e-05	8.60683e-06	2.02074e-05	6.22775e-06	1.56769e-06	1.29202e-05
1226	2.79915e-05	8.60683e-06	2.02074e-05	6.22775e-06	1.56769e-06	1.29202e-05
1227	2.7936e-05	8.60683e-06	2.02074e-05	6.22775e-06	1.56769e-06	1.29091e-05
1228	2.21715e-05	5.9536e-06	1.63389e-05	4.59667e-06	1.56769e-06	1.01257e-05
1229	2.04532e-05	5.69474e-06	1.58382e-05	4.15183e-06	1.56769e-06	9.54113e-06
1230	1.62406e-05	5.04761e-06	1.45639e-05	3.63286e-06	1.56769e-06	8.21053e-06
1231	1.66286e-05	5.17704e-06	1.4928e-05	3.85527e-06	1.56769e-06	8.43132e-06
1232	1.60743e-05	5.17704e-06	1.47459e-05	3.70699e-06	1.56769e-06	8.25438e-06
1233	4.61166e-05	1.37839e-05	3.3861e-05	1.52728e-05	7.83845e-06	2.33746e-05
1234	4.84446e-05	1.41074e-05	3.56815e-05	1.60884e-05	7.83845e-06	2.44321e-05
1235	5.15487e-05	1.4431e-05	3.7593e-05	1.71263e-05	8.62229e-06	2.58643e-05
1236	5.16595e-05	1.45604e-05	3.78206e-05	1.72005e-05	8.62229e-06	2.59727e-05
1237	5.17149e-05	1.45604e-05	3.77751e-05	1.72746e-05	8.62229e-06	2.59895e-05
1238	5.17704e-05	1.45604e-05	3.77751e-05	1.72746e-05	8.62229e-06	2.60006e-05
1239	5.08835e-05	1.36544e-05	3.64097e-05	1.69039e-05	8.62229e-06	2.52948e-05
1240	5.17149e-05	1.37192e-05	3.65463e-05	1.6978e-05	8.62229e-06	2.55161e-05
1241	5.17149e-05	1.3525e-05	3.63642e-05	1.69039e-05	8.62229e-06	2.54261e-05
1242	5.16041e-05	1.34603e-05	3.63642e-05	1.69039e-05	8.62229e-06	2.5391e-05
1243	4.51744e-05	1.13895e-05	2.95374e-05	1.5347e-05	8.62229e-06	2.20141e-05
1244	4.72806e-05	1.17778e-05	3.09027e-05	1.57918e-05	9.40614e-06	2.30318e-05
1245	4.73361e-05	1.17778e-05	3.09938e-05	1.58659e-05	9.40614e-06	2.30759e-05
1246	4.73361e-05	1.17778e-05	3.09938e-05	1.58659e-05	9.40614e-06	2.30759e-05
1247	4.73361e-05	1.17778e-05	3.09938e-05	1.58659e-05	9.40614e-06	2.30759e-05
1248	4.73915e-05	1.17778e-05	3.09938e-05	1.58659e-05	9.40614e-06	2.3087e-05
1249	4.71698e-05	1.13895e-05	3.0038e-05	1.57177e-05	9.40614e-06	2.27442e-05
1250	4.71144e-05	1.13248e-05	2.9947e-05	1.57177e-05	9.40614e-06	2.2702e-05
1251	4.69481e-05	1.11306e-05	2.9856e-05	1.56435e-05	9.40614e-06	2.25969e-05
1252	4.65601e-05	1.08718e-05	2.89002e-05	1.49763e-05	9.40614e-06	2.21429e-05
1253	4.64492e-05	1.08718e-05	2.87637e-05	1.49021e-05	9.40614e-06	2.20786e-05
1254	4.40104e-05	9.31867e-06	2.49862e-05	1.37159e-05	8.62229e-06	2.01307e-05
1255	1.21389e-05	1.03541e-06	3.95956e-06	1.63108e-06	1.56769e-06	4.06653e-06
1256	1.29149e-05	1.16483e-06	4.18712e-06	1.63108e-06	1.56769e-06	4.29312e-06
1257	1.26932e-05	1.10012e-06	4.09609e-06	1.55694e-06	1.56769e-06	4.20281e-06
1258	1.25269e-05	1.10012e-06	4.05058e-06	1.55694e-06	2.35153e-06	4.31721e-06
1259	7.31658e-06	9.05982e-07	3.0038e-06	1.03796e-06	1.56769e-06	2.7664e-06
1260	9.92173e-06	1.22955e-06	3.77751e-06	1.26038e-06	1.56769e-06	3.55137e-06
1261	9.58916e-06	1.22955e-06	3.77751e-06	1.26038e-06	1.56769e-06	3.48486e-06
1262	9.25659e-06	1.22955e-06	3.68648e-06	1.26038e-06	1.56769e-06	3.40014e-06
1263	8.59144e-06	9.70695e-07	3.09483e-06	1.03796e-06	7.83845e-07	2.89575e-06
1264	7.26115e-06	9.05982e-07	2.36663e-06	7.41399e-07	7.83845e-07	2.4118e-06
1265	9.20116e-06	1.22955e-06	2.77624e-06	8.15539e-07	7.83845e-07	2.96127e-06
1266	9.31202e-06	1.22955e-06	2.73073e-06	8.15539e-07	7.83845e-07	2.97434e-06
1267	8.75773e-06	1.22955e-06	2.50317e-06	7.41399e-07	7.83845e-07	2.80314e-06
1268	1.2416e-05	1.74725e-06	4.05058e-06	1.40866e-06	7.83845e-07	4.08127e-06
1269	1.26932e-05	1.74725e-06	4.05058e-06	1.40866e-06	7.83845e-07	4.13671e-06
1270	1.26932e-05	1.74725e-06	4.05058e-06	1.40866e-06	7.83845e-07	4.13671e-06
1271	1.26932e-05	1.74725e-06	4.05058e-06	1.33452e-06	7.83845e-07	4.12188e-06
1272	1.26932e-05	1.74725e-06	4.05058e-06	1.33452e-06	7.83845e-07	4.12188e-06
1273	1.22497e-05	1.74725e-06	3.95956e-06	1.33452e-06	7.83845e-07	4.01498e-06
1274	1.24714e-05	1.81196e-06	4.00507e-06	1.33452e-06	7.83845e-07	4.08136e-06
1275	1.15846e-05	1.61783e-06	3.732e-06	1.18624e-06	7.83845e-07	3.7809e-06
1276	1.2804e-05	1.61783e-06	3.91404e-06	1.18624e-06	7.83845e-07	4.06119e-06
1277	1.26932e-05	1.55311e-06	3.91404e-06	1.18624e-06	7.83845e-07	4.02609e-06
1278	1.67395e-05	2.26496e-06	6.7358e-06	1.63108e-06	7.83845e-07	5.63104e-06
1279	1.67395e-05	2.26496e-06	6.7358e-06	1.63108e-06	7.83845e-07	5.63104e-06
1280	1.66286e-05	2.26496e-06	6.69029e-06	1.63108e-06	7.83845e-07	5.59976e-06
1281	1.65177e-05	2.26496e-06	6.50824e-06	1.63108e-06	7.83845e-07	5.54117e-06
1282	1.65732e-05	2.26496e-06	6.41721e-06	1.55694e-06	7.83845e-07	5.51923e-06
1283	1.49657e-05	1.94139e-06	5.64351e-06	1.40866e-06	7.83845e-07	4.94862e-06
1284	1.53537e-05	2.0061e-06	5.96209e-06	1.40866e-06	0	4.94611e-06
1285	1.49103e-05	1.81196e-06	5.82556e-06	1.33452e-06	0	4.77647e-06
1286	1.3968e-05	1.94139e-06	5.73453e-06	1.33452e-06	0	4.59569e-06
1287	1.9788e-05	1.02247e-05	1.50645e-05	6.07947e-06	3.13538e-06	1.08584e-05
1288	1.9788e-05	1.02894e-05	1.53376e-05	6.07947e-06	3.91922e-06	1.10827e-05
1289	1.68503e-05	9.9658e-06	1.47459e-05	5.70877e-06	3.91922e-06	1.0238e-05
1290	2.16172e-05	1.05482e-05	1.57927e-05	6.30189e-06	5.48691e-06	1.19494e-05
1291	2.15063e-05	1.05482e-05	1.55652e-05	6.30189e-06	5.48691e-06	1.18817e-05
1292	2.12292e-05	1.05482e-05	1.54286e-05	6.15361e-06	5.48691e-06	1.17693e-05
1293	2.20606e-05	1.05482e-05	1.57017e-05	6.37603e-06	5.48691e-06	1.20347e-05
1294	2.18389e-05	1.04835e-05	1.57927e-05	6.30189e-06	5.48691e-06	1.19808e-05
1295	2.21715e-05	1.04835e-05	1.58837e-05	6.37603e-06	5.48691e-06	1.20803e-05
1296	2.22823e-05	1.05482e-05	1.58837e-05	6.30189e-06	5.48691e-06	1.21006e-05
1297	2.23932e-05	1.04835e-05	1.59293e-05	6.30189e-06	5.48691e-06	1.2119e-05
1298	1.81252e-05	9.70695e-06	1.32895e-05	5.93119e-06	5.48691e-06	1.0508e-05
1299	2.02869e-05	1.06776e-05	1.46549e-05	7.33985e-06	7.0546e-06	1.20028e-05
1300	2.0176e-05	1.08071e-05	1.49735e-05	7.85883e-06	7.0546e-06	1.2174e-05
1301	2.91e-05	1.21013e-05	1.85234e-05	1.12693e-05	1.33254e-05	1.68639e-05
1302	2.93218e-05	1.22308e-05	1.8569e-05	1.13434e-05	1.33254e-05	1.69581e-05
1303	2.92663e-05	1.22308e-05	1.86145e-05	1.14175e-05	1.33254e-05	1.69709e-05
1304	2.93218e-05	1.22955e-05	1.86145e-05	1.14175e-05	1.33254e-05	1.69949e-05
1305	2.80469e-05	1.2166e-05	1.81593e-05	1.13434e-05	1.33254e-05	1.66082e-05
1306	5.33224e-05	3.04151e-05	3.98231e-05	4.37425e-05	5.40853e-05	4.42777e-05
1307	5.36549e-05	3.09975e-05	4.03238e-05	4.50771e-05	5.33014e-05	4.46709e-05
1308	5.37104e-05	3.1127e-05	4.03693e-05	4.52253e-05	5.33014e-05	4.47467e-05
1309	5.39321e-05	3.09975e-05	4.01872e-05	4.50029e-05	5.33014e-05	4.46842e-05
1310	5.38767e-05	3.07387e-05	4.00962e-05	4.50029e-05	5.33014e-05	4.46032e-05
1311	5.06064e-05	2.37497e-05	3.39976e-05	4.15925e-05	5.09499e-05	4.01792e-05
1312	4.79458e-05	2.31673e-05	3.27232e-05	4.06287e-05	5.01661e-05	3.89262e-05
1313	5.91424e-05	2.91209e-05	4.51936e-05	4.68564e-05	5.17337e-05	4.64094e-05
1314	5.94195e-05	2.92503e-05	4.52391e-05	4.68564e-05	5.17337e-05	4.64998e-05
1315	5.94195e-05	2.9315e-05	4.52391e-05	4.68564e-05	5.17337e-05	4.65127e-05
1316	5.94195e-05	2.9315e-05	4.52391e-05	4.68564e-05	5.17337e-05	4.65127e-05
1317	5.94195e-05	2.9315e-05	4.52391e-05	4.68564e-05	5.17337e-05	4.65127e-05
1318	5.93087e-05	2.9315e-05	4.52391e-05	4.68564e-05	5.17337e-05	4.64906e-05
1319	5.93087e-05	2.9315e-05	4.51936e-05	4.68564e-05	5.17337e-05	4.64815e-05
1320	5.85327e-05	2.91209e-05	4.46929e-05	4.67081e-05	5.17337e-05	4.61577e-05
1321	5.74795e-05	2.90561e-05	4.41468e-05	4.61892e-05	5.17337e-05	4.57211e-05
1322	5.66481e-05	2.86031e-05	4.28724e-05	4.51512e-05	5.25176e-05	4.51585e-05
1323	5.37658e-05	2.76325e-05	4.09609e-05	4.41874e-05	5.09499e-05	4.34993e-05
1324	5.27127e-05	2.74383e-05	4.04603e-05	4.38167e-05	4.93822e-05	4.2762e-05
1325	4.61166e-05	1.95433e-05	3.30418e-05	3.2325e-05	3.60569e-05	3.34167e-05
1326	5.50961e-05	1.99963e-05	3.53629e-05	3.30664e-05	3.99761e-05	3.66996e-05
1327	5.30452e-05	1.92845e-05	3.3861e-05	2.98042e-05	3.68407e-05	3.45671e-05
1328	5.30452e-05	1.92845e-05	3.38155e-05	2.98042e-05	3.68407e-05	3.4558e-05
1329	5.24355e-05	1.92198e-05	3.30873e-05	2.89887e-05	3.68407e-05	3.41144e-05
1330	5.24909e-05	1.90256e-05	3.28143e-05	2.88404e-05	3.68407e-05	3.40024e-05
1331	4.81675e-05	1.43016e-05	2.73073e-05	2.04626e-05	2.82184e-05	2.76915e-05
1332	2.68829e-05	4.01221e-06	9.78511e-06	5.48635e-06	8.62229e-06	1.09578e-05
1333	2.78806e-05	3.94749e-06	9.69409e-06	5.70877e-06	8.62229e-06	1.11706e-05
1334	2.66612e-05	3.62393e-06	8.46526e-06	5.33807e-06	8.62229e-06	1.05422e-05
1335	2.68829e-05	3.62393e-06	8.41975e-06	5.18979e-06	8.62229e-06	1.05477e-05
1336	2.38343e-05	3.10622e-06	7.05438e-06	4.37425e-06	8.62229e-06	9.39829e-06
1337	2.47212e-05	3.17094e-06	7.5095e-06	4.52253e-06	8.62229e-06	9.70929e-06
1338	2.47766e-05	3.17094e-06	7.41848e-06	4.52253e-06	8.62229e-06	9.70217e-06
1339	2.47212e-05	3.17094e-06	7.41848e-06	4.44839e-06	8.62229e-06	9.67626e-06
1340	2.328e-05	2.78266e-06	6.82682e-06	4.00355e-06	8.62229e-06	9.10306e-06
1341	2.03977e-05	2.39438e-06	6.05312e-06	3.3363e-06	8.62229e-06	8.16076e-06
1342	2.06195e-05	2.39438e-06	6.05312e-06	3.41044e-06	8.62229e-06	8.21995e-06
1343	2.0564e-05	2.39438e-06	6.05312e-06	3.41044e-06	8.62229e-06	8.20885e-06
1344	2.03423e-05	2.39438e-06	5.87107e-06	3.41044e-06	8.62229e-06	8.1281e-06
1345	1.61852e-05	1.74725e-06	4.00507e-06	2.66904e-06	7.0546e-06	6.33223e-06
1346	1.49103e-05	1.4884e-06	3.77751e-06	2.29834e-06	7.0546e-06	5.90583e-06
1347	7.5383e-06	8.41269e-07	1.91151e-06	8.15539e-07	5.48691e-06	3.31871e-06
1348	8.36973e-06	1.03541e-06	2.32112e-06	8.15539e-07	4.70307e-06	3.44897e-06
1349	8.92401e-06	1.22955e-06	2.95829e-06	8.89679e-07	2.35153e-06	3.27061e-06
1350	1.73492e-05	2.20024e-06	6.78131e-06	1.63108e-06	3.13538e-06	6.21944e-06
1351	1.79589e-05	2.32967e-06	7.23643e-06	1.63108e-06	3.13538e-06	6.45829e-06
1352	1.84023e-05	2.32967e-06	7.55502e-06	1.8535e-06	3.13538e-06	6.65517e-06
1353	1.81252e-05	2.39438e-06	7.55502e-06	1.8535e-06	3.13538e-06	6.6127e-06
1354	1.76817e-05	2.39438e-06	7.28194e-06	1.77936e-06	3.13538e-06	6.45455e-06
1355	1.69057e-05	2.26496e-06	7.41848e-06	1.8535e-06	1.56769e-06	6.00207e-06
1356	1.79589e-05	2.52381e-06	8.69282e-06	2.00178e-06	1.56769e-06	6.549e-06
1357	1.71829e-05	2.52381e-06	8.82936e-06	1.92764e-06	1.56769e-06	6.40628e-06
1358	2.95989e-05	4.07692e-06	1.46094e-05	2.81732e-06	1.56769e-06	1.0534e-05
1359	3.03195e-05	4.27106e-06	1.48825e-05	2.81732e-06	1.56769e-06	1.07716e-05
1360	3.03195e-05	4.27106e-06	1.48825e-05	2.74318e-06	1.56769e-06	1.07568e-05
1361	3.04303e-05	4.27106e-06	1.4928e-05	2.74318e-06	1.56769e-06	1.0788e-05
1362	3.04303e-05	4.20635e-06	1.4928e-05	2.74318e-06	1.56769e-06	1.07751e-05
1363	3.02086e-05	4.14163e-06	1.48825e-05	2.74318e-06	1.56769e-06	1.07087e-05
1364	3.0264e-05	4.14163e-06	1.4928e-05	2.74318e-06	1.56769e-06	1.07289e-05
1365	3.09846e-05	4.14163e-06	1.52011e-05	2.66904e-06	1.56769e-06	1.09128e-05
1366	3.09846e-05	4.14163e-06	1.52011e-05	2.66904e-06	1.56769e-06	1.09128e-05
1367	3.08738e-05	4.14163e-06	1.51555e-05	2.66904e-06	1.56769e-06	1.08815e-05
1368	2.82132e-05	3.55922e-06	1.40177e-05	2.37248e-06	7.83845e-07	9.78929e-06
1369	4.47309e-05	4.27106e-06	1.99343e-05	3.70699e-06	7.83845e-07	1.46854e-05
1370	4.55624e-05	4.33577e-06	2.01619e-05	3.70699e-06	7.83845e-07	1.49102e-05
1371	4.56732e-05	4.33577e-06	2.01164e-05	3.70699e-06	7.83845e-07	1.49232e-05
1372	4.47864e-05	3.94749e-06	1.95247e-05	3.3363e-06	7.83845e-07	1.44757e-05
1373	4.47864e-05	3.94749e-06	1.92516e-05	3.3363e-06	0	1.42644e-05
1374	4.35115e-05	3.75335e-06	1.84779e-05	2.9656e-06	0	1.37417e-05
1375	3.94652e-05	3.10622e-06	1.59293e-05	2.44662e-06	0	1.21895e-05
1376	4.30681e-05	3.42979e-06	1.66574e-05	2.81732e-06	0	1.31945e-05
1377	4.05184e-05	3.10622e-06	1.54286e-05	2.81732e-06	0	1.23741e-05
1378	7.84316e-05	8.41269e-06	3.52719e-05	1.26038e-05	3.13538e-06	2.75711e-05
1379	7.8875e-05	8.4774e-06	3.60911e-05	1.29745e-05	3.91922e-06	2.80674e-05
1380	7.88196e-05	8.54212e-06	3.60001e-05	1.30486e-05	3.91922e-06	2.80659e-05
1381	7.89304e-05	8.73626e-06	3.60911e-05	1.31228e-05	3.91922e-06	2.816e-05
1382	7.8875e-05	8.73626e-06	3.60456e-05	1.31969e-05	3.91922e-06	2.81546e-05
1383	7.90413e-05	8.67154e-06	3.59091e-05	1.34193e-05	3.91922e-06	2.81921e-05
1384	7.48287e-05	8.54212e-06	3.43162e-05	1.379e-05	4.70307e-06	2.7236e-05
1385	0.000138073	2.12906e-05	7.37297e-05	3.05456e-05	1.33254e-05	5.53929e-05
1386	0.00014672	2.29084e-05	7.97828e-05	3.15836e-05	1.56769e-05	5.93343e-05
1387	0.000147496	2.31025e-05	8.03289e-05	3.18802e-05	1.56769e-05	5.96969e-05
1388	0.000147662	2.32967e-05	8.04655e-05	3.21026e-05	1.56769e-05	5.98407e-05
1389	0.000147607	2.32967e-05	8.02834e-05	3.22509e-05	1.56769e-05	5.9823e-05
1390	0.000147607	2.3232e-05	8.042e-05	3.22509e-05	1.56769e-05	5.98374e-05
1391	0.000147219	2.28437e-05	7.91911e-05	3.22509e-05	1.56769e-05	5.94363e-05
1392	0.000147551	2.30378e-05	7.78713e-05	3.25474e-05	1.56769e-05	5.93369e-05
1393	0.000153039	2.38144e-05	8.18308e-05	3.3363e-05	1.64607e-05	6.17016e-05
1394	0.000153759	2.40732e-05	8.27411e-05	3.36595e-05	1.72446e-05	6.22955e-05
1395	0.00015448	2.4138e-05	8.31962e-05	3.35112e-05	1.72446e-05	6.2514e-05
1396	0.000151265	2.39438e-05	8.15578e-05	3.32147e-05	1.72446e-05	6.14452e-05
1397	0.000154203	2.42027e-05	8.31962e-05	3.30664e-05	1.72446e-05	6.23826e-05
1398	0.000153815	2.40085e-05	8.29686e-05	3.29923e-05	1.64607e-05	6.2049e-05
1399	0.000137907	2.09023e-05	7.33656e-05	2.79507e-05	1.41092e-05	5.4847e-05
1400	0.000176208	2.75677e-05	9.95351e-05	3.24733e-05	1.80284e-05	7.07625e-05
1401	0.000176651	2.75677e-05	0.000100354	3.23991e-05	1.80284e-05	7.1e-05
1402	0.000177593	2.76972e-05	0.000101401	3.2325e-05	1.80284e-05	7.14089e-05
1403	0.000177483	2.78266e-05	0.000101447	3.2325e-05	1.80284e-05	7.1422e-05
1404	0.000177205	2.75677e-05	0.000101128	3.21767e-05	1.72446e-05	7.10644e-05
1405	0.000147385	2.31673e-05	8.30142e-05	2.5949e-05	1.17577e-05	5.82546e-05
1406	0.000170665	3.00268e-05	9.78056e-05	3.21026e-05	1.88123e-05	6.98825e-05
1407	0.000176263	3.35213e-05	0.000103449	3.41044e-05	1.88123e-05	7.323e-05
1408	0.000175709	3.46862e-05	0.000105179	3.4994e-05	1.88123e-05	7.38761e-05
1409	0.000191229	3.66923e-05	0.000114691	3.64768e-05	2.27315e-05	8.03641e-05
1410	0.000193224	3.66276e-05	0.000114918	3.54389e-05	2.27315e-05	8.0588e-05
1411	0.000193723	3.5851e-05	0.000116056	3.46975e-05	2.27315e-05	8.06118e-05
1412	0.000196827	3.61099e-05	0.000118423	3.46233e-05	2.27315e-05	8.17429e-05
1413	0.000197215	3.61099e-05	0.000118286	3.45492e-05	2.27315e-05	8.17783e-05
1414	0.000195109	3.5398e-05	0.000115555	3.3363e-05	2.27315e-05	8.04313e-05
1415	0.000190952	3.46862e-05	0.00011287	3.08422e-05	2.19477e-05	7.82596e-05
1416	0.00017582	3.21624e-05	0.00010486	2.8099e-05	2.038e-05	7.22643e-05
1417	0.000193723	3.74041e-05	0.000116648	3.63286e-05	2.5083e-05	8.18373e-05
1418	0.000194167	3.75335e-05	0.00011733	3.62544e-05	2.58669e-05	8.22304e-05
1419	0.000193446	3.75983e-05	0.000116966	3.61061e-05	2.58669e-05	8.19967e-05
1420	0.000193113	3.75335e-05	0.000116511	3.59579e-05	2.58669e-05	8.17965e-05
1421	0.000171496	3.05445e-05	9.83518e-05	3.17319e-05	2.42992e-05	7.12847e-05
1422	0.000179035	3.43626e-05	0.000106999	3.71441e-05	2.74346e-05	7.69951e-05
1423	0.000169501	3.30683e-05	0.000104086	3.47716e-05	2.74346e-05	7.37723e-05
1424	0.000169612	3.29389e-05	0.000104177	3.47716e-05	2.74346e-05	7.37868e-05
1425	0.000169335	3.24859e-05	0.000103449	3.43268e-05	2.74346e-05	7.34063e-05
1426	0.000169168	3.22271e-05	0.000102948	3.42526e-05	2.74346e-05	7.32061e-05
1427	0.000157916	2.0514e-05	8.08751e-05	2.89146e-05	2.35153e-05	6.2347e-05
1428	0.000150766	2.01905e-05	7.80533e-05	2.83214e-05	2.35153e-05	6.01693e-05
1429	0.000111134	1.72784e-05	6.33529e-05	2.35023e-05	1.72446e-05	4.65024e-05
1430	0.000113185	1.76019e-05	6.41266e-05	2.40213e-05	1.72446e-05	4.72359e-05
1431	0.000112465	1.76019e-05	6.39446e-05	2.40213e-05	1.72446e-05	4.70555e-05
1432	0.000112132	1.76019e-05	6.35805e-05	2.40213e-05	1.72446e-05	4.69161e-05
1433	0.000107254	1.65018e-05	5.91203e-05	2.31316e-05	1.72446e-05	4.46505e-05
1434	8.91293e-05	1.48193e-05	4.71961e-05	2.15006e-05	1.56769e-05	3.76644e-05
1435	8.65796e-05	1.46899e-05	4.63314e-05	2.15747e-05	1.4893e-05	3.68137e-05
1436	6.1803e-05	1.11306e-05	3.28143e-05	1.72005e-05	1.25415e-05	2.7098e-05
1437	6.28007e-05	1.11953e-05	3.28598e-05	1.61625e-05	9.40614e-06	2.64849e-05
1438	6.28007e-05	1.11953e-05	3.27687e-05	1.61625e-05	9.40614e-06	2.64667e-05
1439	6.22464e-05	1.10659e-05	3.24502e-05	1.60884e-05	9.40614e-06	2.62514e-05
1440	6.20247e-05	1.10659e-05	3.23136e-05	1.58659e-05	9.40614e-06	2.61352e-05
1441	5.27127e-05	7.70085e-06	2.40304e-05	1.18624e-05	8.62229e-06	2.09857e-05
1442	1.22497e-05	1.42369e-06	4.36917e-06	2.15006e-06	1.56769e-06	4.35206e-06
1443	2.00652e-05	2.91209e-06	9.28448e-06	5.26393e-06	4.70307e-06	8.44575e-06
1444	1.98989e-05	3.36508e-06	9.55755e-06	5.33807e-06	4.70307e-06	8.57253e-06
1445	2.12292e-05	4.59462e-06	1.11505e-05	6.52431e-06	4.70307e-06	9.64034e-06
1446	2.18943e-05	4.78876e-06	1.21062e-05	6.89501e-06	6.27076e-06	1.0391e-05
1447	2.0952e-05	5.11233e-06	1.21973e-05	7.11743e-06	7.0546e-06	1.04867e-05
1448	5.26572e-05	1.43016e-05	3.00835e-05	1.80901e-05	2.038e-05	2.71025e-05
1449	5.47635e-05	1.46251e-05	3.12668e-05	1.84608e-05	2.19477e-05	2.82128e-05
1450	5.49298e-05	1.46251e-05	3.12213e-05	1.83867e-05	2.19477e-05	2.82221e-05
1451	5.50407e-05	1.46899e-05	3.12213e-05	1.83867e-05	2.19477e-05	2.82573e-05
1452	5.49298e-05	1.46899e-05	3.11303e-05	1.83867e-05	2.19477e-05	2.82169e-05
1453	5.43201e-05	1.44957e-05	3.09938e-05	1.81643e-05	2.27315e-05	2.81411e-05
1454	9.44504e-05	3.04798e-05	5.85286e-05	4.16666e-05	5.01661e-05	5.50583e-05
1455	9.73327e-05	3.17094e-05	6.13959e-05	4.30753e-05	5.09499e-05	5.68926e-05
1456	0.000105425	3.70158e-05	6.88144e-05	5.13048e-05	5.48691e-05	6.34858e-05
1457	0.00011834	4.63345e-05	8.10571e-05	6.53173e-05	6.74106e-05	7.56919e-05
1458	0.000120225	4.69169e-05	8.22405e-05	6.60587e-05	6.81945e-05	7.67271e-05
1459	0.000120779	4.72405e-05	8.2559e-05	6.64293e-05	6.81945e-05	7.70405e-05
1460	0.000121167	4.73052e-05	8.27411e-05	6.64293e-05	6.81945e-05	7.71674e-05
1461	0.00012089	4.73052e-05	8.26501e-05	6.63552e-05	6.81945e-05	7.7079e-05
1462	0.000121001	4.73699e-05	8.31052e-05	6.64293e-05	6.81945e-05	7.722e-05
1463	0.00013896	6.03772e-05	9.98537e-05	8.62988e-05	7.83845e-05	9.27748e-05
1464	0.000139237	6.05714e-05	0.000100172	8.65213e-05	7.83845e-05	9.29772e-05
1465	0.000139292	6.05714e-05	9.99447e-05	8.62988e-05	7.99522e-05	9.32118e-05
1466	0.000139348	6.05714e-05	9.99902e-05	8.62988e-05	7.99522e-05	9.32321e-05
1467	0.00013896	6.04419e-05	9.95351e-05	8.5854e-05	7.99522e-05	9.29486e-05
1468	0.000129703	5.56532e-05	9.05237e-05	7.97745e-05	7.60329e-05	8.63375e-05
1469	0.000133472	5.59767e-05	9.17525e-05	7.98487e-05	7.60329e-05	8.74166e-05
1470	0.000133361	5.55238e-05	9.1707e-05	7.99228e-05	7.60329e-05	8.73095e-05
1471	0.000123107	5.27411e-05	8.52898e-05	7.629e-05	6.97622e-05	8.1438e-05
1472	0.00013059	5.44236e-05	8.89307e-05	7.844e-05	7.36814e-05	8.52131e-05
1473	0.000127264	5.11233e-05	8.35603e-05	7.43623e-05	6.97622e-05	8.12144e-05
1474	0.000115513	4.80818e-05	7.4913e-05	6.96915e-05	6.5843e-05	7.48085e-05
1475	0.00015132	7.35787e-05	0.000102311	9.46767e-05	7.36814e-05	9.91136e-05
1476	0.000152429	7.38375e-05	0.000103404	9.52698e-05	7.36814e-05	9.97243e-05
1477	0.000151431	7.46141e-05	0.000102539	9.35646e-05	7.21137e-05	9.88525e-05
1478	0.000151764	7.49377e-05	0.00010304	9.36387e-05	7.13299e-05	9.89421e-05
1479	0.000151597	7.442e-05	0.000102539	9.26749e-05	7.0546e-05	9.83554e-05
1480	0.00015193	7.48082e-05	0.000102539	9.26007e-05	7.0546e-05	9.84848e-05
1481	0.00015193	7.42258e-05	0.000102175	9.18593e-05	7.0546e-05	9.81472e-05
1482	0.000151819	7.34493e-05	0.000101674	9.11921e-05	7.0546e-05	9.77361e-05
1483	0.000126765	4.96996e-05	7.26829e-05	6.13878e-05	4.15438e-05	7.04158e-05
1484	0.000141509	6.19303e-05	8.65186e-05	7.38433e-05	4.70307e-05	8.21664e-05
1485	0.000145168	6.73015e-05	9.16615e-05	7.92556e-05	5.01661e-05	8.67105e-05
1486	0.000134858	6.44542e-05	8.43795e-05	7.13226e-05	4.38953e-05	7.97819e-05
1487	0.000143449	7.00842e-05	9.27538e-05	7.71055e-05	4.38953e-05	8.54576e-05
1488	0.000144225	7.08607e-05	9.33454e-05	7.71055e-05	4.46791e-05	8.60431e-05
1489	0.000117342	6.40012e-05	7.94642e-05	6.5688e-05	3.29215e-05	7.18834e-05
1490	0.000133639	7.65555e-05	9.5348e-05	7.40658e-05	3.76245e-05	8.34466e-05
1491	0.000133805	7.66849e-05	9.54845e-05	7.44365e-05	3.68407e-05	8.34503e-05
1492	0.000112686	7.43552e-05	8.95679e-05	7.2064e-05	2.90023e-05	7.55351e-05
1493	0.000148826	0.000102376	0.000120835	0.000101942	3.91922e-05	0.000102634
1494	0.000152595	0.000105029	0.00012393	0.000104908	3.99761e-05	0.000105288
1495	0.000157972	0.000110595	0.000130893	0.000108244	4.07599e-05	0.000109693
1496	0.000158526	0.000111759	0.000131257	0.000108096	3.99761e-05	0.000109923
1497	0.000156364	0.000112212	0.000130347	0.000108467	3.91922e-05	0.000109316
1498	0.000175265	0.000140104	0.000151874	0.0001293	4.46791e-05	0.000128244
1499	0.00017582	0.000140815	0.000152511	0.000129522	4.46791e-05	0.000128669
1500	0.000176041	0.000141139	0.00015283	0.000129522	4.46791e-05	0.000128842
1501	0.000175764	0.000140686	0.000152329	0.000128855	4.46791e-05	0.000128463
1502	0.000175764	0.000140686	0.000152375	0.000128707	4.46791e-05	0.000128442
1503	0.000175709	0.000140492	0.000151965	0.000128336	4.46791e-05	0.000128236
1504	0.000169833	0.00013415	0.000144456	0.000122553	4.38953e-05	0.000122977
1505	0.000171275	0.000135444	0.000146048	0.000123072	4.38953e-05	0.000123947
1506	0.000171496	0.000135703	0.000146276	0.000122998	4.38953e-05	0.000124074
1507	0.000171496	0.000135638	0.000146231	0.000123072	4.38953e-05	0.000124066
1508	0.000170942	0.000135315	0.00014573	0.000122924	4.38953e-05	0.000123761
1509	0.000170887	0.000135315	0.000145593	0.000122924	4.38953e-05	0.000123723
1510	0.000170887	0.000135056	0.000145411	0.00012285	4.38953e-05	0.00012362
1511	0.000170887	0.000134927	0.000145184	0.000122553	4.38953e-05	0.000123489
1512	0.000166009	0.000126837	0.000136354	0.000116251	4.31115e-05	0.000117713
1513	0.000160632	0.000123149	0.000129619	0.000111803	4.15438e-05	0.000113349
1514	0.000152207	0.000115383	0.000121882	0.000102387	3.5273e-05	0.000105426
1515	0.000152651	0.000115124	0.000121745	0.000102017	3.5273e-05	0.000105362
1516	0.000151653	0.000113571	0.000120835	9.97923e-05	3.44892e-05	0.000104068
1517	0.000119781	7.2155e-05	8.46526e-05	6.50948e-05	2.35153e-05	7.30397e-05
1518	7.4219e-05	3.83748e-05	4.84249e-05	3.46233e-05	1.4893e-05	4.2107e-05
1519	7.52721e-05	3.85042e-05	4.91531e-05	3.41044e-05	1.41092e-05	4.22286e-05
1520	5.03292e-05	2.43321e-05	3.12213e-05	2.18713e-05	8.62229e-06	2.72752e-05
1521	7.86533e-05	2.6597e-05	4.93352e-05	2.29092e-05	1.019e-05	3.75369e-05
1522	7.90967e-05	2.56263e-05	4.97448e-05	2.10557e-05	8.62229e-06	3.68292e-05
1523	7.84316e-05	2.3685e-05	4.84704e-05	1.99436e-05	7.83845e-06	3.56738e-05
1524	7.76001e-05	2.29731e-05	4.76057e-05	1.95729e-05	7.0546e-06	3.49613e-05
1525	6.1027e-05	1.13248e-05	3.44072e-05	1.17882e-05	4.70307e-06	2.46501e-05
1526	9.70002e-05	2.12906e-05	5.55703e-05	2.15006e-05	6.27076e-06	4.03265e-05
1527	9.88293e-05	2.19377e-05	5.67081e-05	2.18713e-05	6.27076e-06	4.11234e-05
1528	9.9051e-05	2.20024e-05	5.65716e-05	2.16489e-05	6.27076e-06	4.11089e-05
1529	0.000100049	2.2326e-05	5.74363e-05	2.20196e-05	6.27076e-06	4.16203e-05
1530	0.000100437	2.24554e-05	5.74363e-05	2.20937e-05	6.27076e-06	4.17386e-05
1531	0.000101268	2.21318e-05	5.76184e-05	2.19454e-05	7.0546e-06	4.20036e-05
1532	0.000103707	2.31025e-05	6.01671e-05	2.30575e-05	7.0546e-06	4.34177e-05
1533	0.000104372	2.34261e-05	6.13959e-05	2.32799e-05	7.0546e-06	4.39057e-05
1534	0.000104594	2.34261e-05	6.16235e-05	2.32058e-05	7.0546e-06	4.39808e-05
1535	0.000105093	2.34261e-05	6.20331e-05	2.32058e-05	7.0546e-06	4.41625e-05
1536	0.000105204	2.34908e-05	6.20786e-05	2.32058e-05	7.0546e-06	4.42068e-05
1537	0.000105093	2.33614e-05	6.176e-05	2.29092e-05	7.0546e-06	4.40356e-05
1538	0.000104705	2.31025e-05	6.09863e-05	2.26127e-05	7.0546e-06	4.36922e-05
1539	0.000104871	2.31025e-05	6.10318e-05	2.25385e-05	7.0546e-06	4.37197e-05
1540	0.000103042	2.22613e-05	5.85286e-05	2.13523e-05	6.27076e-06	4.2291e-05
1541	0.000103042	2.22613e-05	5.84831e-05	2.12782e-05	6.27076e-06	4.22671e-05
1542	0.000100658	2.18083e-05	5.64351e-05	2.06109e-05	5.48691e-06	4.09998e-05
1543	6.09161e-05	1.35897e-05	3.23591e-05	1.30486e-05	2.35153e-06	2.4453e-05
1544	6.79001e-05	1.37839e-05	3.40886e-05	1.31228e-05	3.13538e-06	2.64062e-05
1545	6.92858e-05	1.38486e-05	3.44982e-05	1.30486e-05	3.13538e-06	2.67633e-05
1546	6.67915e-05	1.3072e-05	3.25412e-05	1.20848e-05	3.13538e-06	2.5525e-05
1547	6.79001e-05	1.3072e-05	3.28598e-05	1.20107e-05	3.13538e-06	2.57956e-05
1548	6.82327e-05	1.3072e-05	3.29053e-05	1.20107e-05	3.13538e-06	2.58712e-05
1549	6.80664e-05	1.3072e-05	3.28598e-05	1.19365e-05	3.13538e-06	2.5814e-05
1550	6.60155e-05	1.22308e-05	3.12668e-05	1.1121e-05	3.13538e-06	2.47539e-05
1551	6.05281e-05	1.05482e-05	2.799e-05	9.11921e-06	2.35153e-06	2.21074e-05
1552	5.96967e-05	1.04188e-05	2.74893e-05	8.00711e-06	2.35153e-06	2.15927e-05
1553	5.96967e-05	1.04188e-05	2.74438e-05	8.00711e-06	2.35153e-06	2.15836e-05
1554	5.79784e-05	1.02894e-05	2.6306e-05	7.56227e-06	2.35153e-06	2.08975e-05
1555	1.93446e-05	7.11843e-07	4.77878e-06	5.93119e-07	7.83845e-07	5.24244e-06
1556	2.17835e-05	8.41269e-07	5.68902e-06	7.41399e-07	7.83845e-07	5.96781e-06
1557	2.1728e-05	8.41269e-07	5.64351e-06	6.67259e-07	7.83845e-07	5.93278e-06
1558	1.94555e-05	7.76556e-07	4.77878e-06	3.70699e-07	7.83845e-07	5.23308e-06
1559	2.31692e-05	1.22955e-06	6.7358e-06	7.41399e-07	7.83845e-07	6.53196e-06
1560	2.31692e-05	1.22955e-06	6.82682e-06	7.41399e-07	7.83845e-07	6.55016e-06
1561	2.31692e-05	1.22955e-06	6.82682e-06	7.41399e-07	7.83845e-07	6.55016e-06
1562	2.2504e-05	1.22955e-06	6.78131e-06	6.67259e-07	7.83845e-07	6.39319e-06
1563	2.19497e-05	1.22955e-06	6.64477e-06	6.67259e-07	7.83845e-07	6.25502e-06
1564	2.06749e-05	1.22955e-06	6.14414e-06	5.18979e-07	7.83845e-07	5.87028e-06
1565	2.21715e-05	1.29426e-06	6.32619e-06	5.93119e-07	7.83845e-07	6.23378e-06
1566	2.20606e-05	1.29426e-06	6.28068e-06	5.93119e-07	7.83845e-07	6.2025e-06
1567	2.10075e-05	1.22955e-06	6.0076e-06	5.93119e-07	7.83845e-07	5.92432e-06
1568	1.68503e-05	9.70695e-07	5.37043e-06	5.93119e-07	7.83845e-07	4.91368e-06
1569	1.74046e-05	9.70695e-07	5.37043e-06	5.93119e-07	0	4.86777e-06
1570	1.61852e-05	9.70695e-07	5.00634e-06	5.93119e-07	0	4.55107e-06
1571	1.24714e-05	9.05982e-07	4.09609e-06	5.93119e-07	0	3.61332e-06
1572	1.33029e-05	1.03541e-06	4.27814e-06	8.15539e-07	0	3.8864e-06
1573	1.2028e-05	9.70695e-07	3.732e-06	8.15539e-07	0	3.50925e-06
1574	1.97326e-05	1.4884e-06	5.64351e-06	1.40866e-06	1.56769e-06	5.96817e-06
1575	2.08966e-05	1.55311e-06	5.87107e-06	1.33452e-06	1.56769e-06	6.2446e-06
1576	2.02315e-05	1.61783e-06	5.68902e-06	1.33452e-06	1.56769e-06	6.08811e-06
1577	2.27812e-05	1.68254e-06	6.78131e-06	1.55694e-06	2.35153e-06	7.0307e-06
1578	2.28366e-05	1.68254e-06	6.96336e-06	1.63108e-06	2.35153e-06	7.09302e-06
1579	2.10629e-05	1.35897e-06	5.41595e-06	1.26038e-06	2.35153e-06	6.28995e-06
1580	2.57743e-05	1.61783e-06	6.87233e-06	1.92764e-06	2.35153e-06	7.70873e-06
1581	2.54972e-05	1.61783e-06	6.59926e-06	1.92764e-06	2.35153e-06	7.59869e-06
1582	4.43984e-05	4.91819e-06	1.6703e-05	8.74851e-06	8.62229e-06	1.66781e-05
1583	4.53406e-05	4.9829e-06	1.72036e-05	8.82265e-06	8.62229e-06	1.69944e-05
1584	4.58395e-05	5.11233e-06	1.79318e-05	8.89679e-06	8.62229e-06	1.72805e-05
1585	4.59504e-05	5.11233e-06	1.79318e-05	8.89679e-06	8.62229e-06	1.73027e-05
1586	4.58949e-05	5.11233e-06	1.79318e-05	8.97093e-06	8.62229e-06	1.73065e-05
1587	4.59504e-05	5.11233e-06	1.79318e-05	8.97093e-06	8.62229e-06	1.73176e-05
1588	4.59504e-05	5.11233e-06	1.78863e-05	8.97093e-06	8.62229e-06	1.73085e-05
1589	4.31235e-05	5.04761e-06	1.75677e-05	8.97093e-06	8.62229e-06	1.66664e-05
1590	6.30224e-05	1.3978e-05	3.67738e-05	1.95729e-05	1.25415e-05	2.91777e-05
1591	7.01173e-05	1.82491e-05	4.58307e-05	2.50593e-05	1.4893e-05	3.48299e-05
1592	7.18355e-05	1.93492e-05	4.8516e-05	2.63197e-05	1.4893e-05	3.61827e-05
1593	7.31104e-05	1.99963e-05	5.0564e-05	2.72835e-05	1.4893e-05	3.71694e-05
1594	7.39418e-05	2.05787e-05	5.21569e-05	2.80249e-05	1.4893e-05	3.79191e-05
1595	7.24453e-05	2.0514e-05	5.22479e-05	2.83214e-05	1.4893e-05	3.76843e-05
1596	9.66122e-05	2.8862e-05	7.25919e-05	3.85527e-05	1.95961e-05	5.1243e-05
1597	9.70002e-05	2.89914e-05	7.29105e-05	3.8701e-05	1.95961e-05	5.14398e-05
1598	9.70002e-05	2.89914e-05	7.2956e-05	3.86269e-05	1.95961e-05	5.14341e-05
1599	9.72219e-05	2.89914e-05	7.3047e-05	3.86269e-05	1.95961e-05	5.14967e-05
1600	9.72219e-05	2.90561e-05	7.3229e-05	3.8701e-05	1.95961e-05	5.15608e-05
1601	9.38962e-05	2.86031e-05	7.18637e-05	3.78855e-05	1.88123e-05	5.02122e-05
1602	8.99053e-05	2.83443e-05	7.09534e-05	3.76631e-05	1.88123e-05	4.91357e-05
1603	0.000111744	4.1481e-05	9.51659e-05	5.85705e-05	2.66507e-05	6.67224e-05
1604	0.000111744	4.18693e-05	9.63947e-05	5.89412e-05	2.66507e-05	6.712e-05
1605	0.000111966	4.18693e-05	9.64858e-05	5.89412e-05	2.66507e-05	6.71826e-05
1606	0.000112077	4.1934e-05	9.64402e-05	5.89412e-05	2.66507e-05	6.72086e-05
1607	0.000112077	4.1934e-05	9.64858e-05	5.90895e-05	2.66507e-05	6.72474e-05
1608	0.000110469	4.17399e-05	9.59396e-05	5.84964e-05	2.66507e-05	6.66591e-05
1609	0.000110469	4.17399e-05	9.58941e-05	5.84964e-05	2.66507e-05	6.665e-05
1610	0.000109915	4.14163e-05	9.51659e-05	5.81257e-05	2.66507e-05	6.62547e-05
1611	0.00010997	4.12869e-05	9.48473e-05	5.79033e-05	2.66507e-05	6.61316e-05
1612	0.000102931	3.54627e-05	8.36058e-05	5.10083e-05	1.95961e-05	5.85208e-05
1613	8.95727e-05	2.92503e-05	6.81772e-05	4.42615e-05	1.72446e-05	4.97013e-05
1614	8.9739e-05	2.92503e-05	6.82227e-05	4.44839e-05	1.72446e-05	4.97881e-05
1615	8.45841e-05	2.66618e-05	6.26247e-05	4.18149e-05	1.4893e-05	4.61157e-05
1616	5.54287e-05	1.96728e-05	4.56032e-05	3.21767e-05	1.09738e-05	3.2771e-05
1617	8.03161e-05	2.25848e-05	5.30672e-05	3.73665e-05	1.09738e-05	4.08617e-05
1618	8.17018e-05	2.28437e-05	5.36588e-05	3.77372e-05	1.09738e-05	4.13831e-05
1619	8.20344e-05	2.2779e-05	5.38864e-05	3.78113e-05	1.09738e-05	4.1497e-05
1620	7.95401e-05	2.11612e-05	5.07005e-05	3.47716e-05	1.019e-05	3.92727e-05
1621	8.33647e-05	2.18083e-05	5.2521e-05	3.6032e-05	1.09738e-05	4.094e-05
1622	8.28104e-05	2.10964e-05	5.13832e-05	3.37337e-05	1.09738e-05	3.99995e-05
1623	8.14801e-05	1.98669e-05	4.91076e-05	3.12129e-05	1.019e-05	3.83715e-05
1624	7.71567e-05	1.66312e-05	4.21898e-05	2.51334e-05	7.0546e-06	3.36331e-05
1625	5.77567e-05	8.73626e-06	2.50317e-05	1.60884e-05	3.91922e-06	2.23065e-05
1626	7.95401e-05	1.81196e-05	4.35551e-05	2.90628e-05	9.40614e-06	3.59367e-05
1627	8.73556e-05	2.21318e-05	5.21114e-05	3.52906e-05	1.33254e-05	4.2043e-05
1628	8.69121e-05	2.20671e-05	5.14742e-05	3.57354e-05	1.33254e-05	4.19028e-05
1629	8.55819e-05	2.18083e-05	5.03819e-05	3.6032e-05	1.33254e-05	4.14259e-05
1630	8.75219e-05	2.3232e-05	5.21114e-05	3.62544e-05	1.33254e-05	4.2489e-05
1631	8.6247e-05	2.31673e-05	5.13832e-05	3.59579e-05	1.33254e-05	4.20162e-05
1632	8.70784e-05	2.36202e-05	5.25665e-05	3.61803e-05	1.33254e-05	4.25542e-05
1633	8.69121e-05	2.36202e-05	5.24755e-05	3.61803e-05	1.33254e-05	4.25027e-05
1634	8.13693e-05	2.23907e-05	4.93352e-05	3.38819e-05	1.33254e-05	4.00605e-05
1635	8.73001e-05	2.76325e-05	5.67992e-05	3.63286e-05	1.41092e-05	4.44339e-05
1636	8.70784e-05	2.77619e-05	5.69357e-05	3.61803e-05	1.41092e-05	4.44131e-05
1637	8.70784e-05	2.77619e-05	5.69812e-05	3.62544e-05	1.41092e-05	4.4437e-05
1638	8.69676e-05	2.77619e-05	5.69812e-05	3.61803e-05	1.41092e-05	4.44e-05
1639	8.68013e-05	2.76972e-05	5.68902e-05	3.61061e-05	1.41092e-05	4.43208e-05
1640	8.66904e-05	2.76972e-05	5.66626e-05	3.58837e-05	1.41092e-05	4.42086e-05
1641	8.59699e-05	2.76972e-05	5.63896e-05	3.55872e-05	1.41092e-05	4.39506e-05
1642	8.57481e-05	2.76325e-05	5.6344e-05	3.5513e-05	1.41092e-05	4.38694e-05
1643	8.53047e-05	2.7503e-05	5.60255e-05	3.52906e-05	1.41092e-05	4.36466e-05
1644	6.97293e-05	2.39438e-05	4.82884e-05	2.87663e-05	1.17577e-05	3.64971e-05
1645	6.92304e-05	2.39438e-05	4.81519e-05	2.84697e-05	1.17577e-05	3.63107e-05
1646	3.46983e-05	1.68254e-05	2.97194e-05	1.57177e-05	2.35153e-06	1.98625e-05
1647	4.18486e-05	1.88962e-05	3.31784e-05	1.67556e-05	3.13538e-06	2.27628e-05
1648	2.8324e-05	1.4884e-05	2.30747e-05	1.06761e-05	3.13538e-06	1.60188e-05
1649	5.71469e-05	2.26496e-05	3.81847e-05	1.62366e-05	7.0546e-06	2.82545e-05
1650	5.75904e-05	2.26496e-05	3.83212e-05	1.61625e-05	7.0546e-06	2.83557e-05
1651	5.65372e-05	2.13553e-05	3.65918e-05	1.50504e-05	7.0546e-06	2.73179e-05
1652	5.43755e-05	2.11612e-05	3.5545e-05	1.4828e-05	6.27076e-06	2.64361e-05
1653	7.67687e-05	4.71111e-05	5.50697e-05	4.07028e-05	3.5273e-05	5.09851e-05
1654	7.95956e-05	5.00232e-05	5.72088e-05	4.41874e-05	3.91922e-05	5.40414e-05
1655	7.98727e-05	5.01526e-05	5.74363e-05	4.47064e-05	3.91922e-05	5.4272e-05
1656	7.99836e-05	5.0282e-05	5.74818e-05	4.46322e-05	3.91922e-05	5.43144e-05
1657	8.00944e-05	5.03467e-05	5.75274e-05	4.47805e-05	3.91922e-05	5.43882e-05
1658	7.81544e-05	4.82759e-05	5.48421e-05	4.35943e-05	3.91922e-05	5.28118e-05
1659	7.7711e-05	5.1641e-05	5.47511e-05	4.6115e-05	3.99761e-05	5.40388e-05
1660	8.30876e-05	5.9536e-05	6.17145e-05	5.16755e-05	4.46791e-05	6.01385e-05
1661	8.00944e-05	5.85006e-05	5.92113e-05	5.0341e-05	4.5463e-05	5.87221e-05
1662	0.000113795	0.000132468	0.000103631	0.000104167	6.89783e-05	0.000104608
1663	0.000114405	0.000136739	0.000105315	0.000105649	7.0546e-05	0.000106531
1664	0.00011568	0.000140233	0.000106817	0.000106465	7.0546e-05	0.000107948
1665	0.000116012	0.000141268	0.000107272	0.000106613	7.13299e-05	0.000108499
1666	0.000115735	0.00014101	0.000106954	0.000106242	7.13299e-05	0.000108254
1667	0.000115402	0.000141333	0.000106954	0.000106613	7.52491e-05	0.00010911
1668	0.000112243	0.000140363	0.00010304	0.000107058	7.83845e-05	0.000108218
1669	0.00010925	0.000143016	0.000101947	0.000109801	8.30875e-05	0.00010942
1670	9.92173e-05	0.000142757	9.70774e-05	0.000110987	8.46552e-05	0.000106939
1671	0.000200541	0.000328095	0.00023152	0.000334519	0.000471091	0.000313153
1672	0.00020625	0.000337672	0.000242898	0.000347642	0.000488335	0.000324559
1673	0.000212347	0.000355016	0.000255414	0.000368327	0.000504012	0.000339023
1674	0.000216615	0.000365499	0.000263015	0.000381524	0.000521257	0.000349582
1675	0.000217003	0.000366081	0.000263697	0.00038271	0.000522041	0.000350306
1676	0.000217502	0.000366793	0.00026438	0.000383377	0.000522041	0.000350819
1677	0.000218001	0.000367246	0.000264517	0.0003836	0.000522041	0.000351081
1678	0.000218333	0.000367635	0.000264835	0.000383674	0.000522041	0.000351304
1679	0.000218333	0.000367635	0.000264881	0.000383748	0.000522041	0.000351328
1680	0.000218389	0.000367829	0.00026529	0.000383822	0.000522041	0.000351474
1681	0.000218721	0.000368023	0.0002657	0.000384267	0.000522041	0.00035175
1682	0.000218444	0.000366146	0.000265108	0.000384267	0.000523608	0.000351515
1683	0.000216005	0.000363105	0.000263288	0.000388864	0.000532231	0.000352699
1684	0.000220772	0.000381871	0.00027594	0.000408066	0.000547907	0.000366911
1685	0.000217447	0.000375271	0.000271935	0.000405471	0.000553394	0.000364704
1686	0.00021462	0.000375206	0.00026834	0.000415109	0.000569071	0.000368469
1687	0.000223544	0.00040012	0.000286863	0.000443208	0.000588667	0.00038848
1688	0.00022687	0.000411898	0.00029633	0.000454848	0.000598073	0.000397604
1689	0.000227479	0.000413516	0.000297604	0.000456702	0.000598857	0.000398832
1690	0.000227313	0.000411704	0.000296193	0.000453588	0.00059729	0.000397218
1691	0.000227424	0.000409957	0.000295419	0.000451883	0.00059337	0.000395611
1692	0.000196938	0.00032926	0.000243262	0.000371144	0.000496174	0.000327356
1693	0.000199543	0.000332366	0.00024663	0.000374777	0.000498525	0.000330368
1694	0.000188291	0.00030894	0.00022929	0.000342378	0.000466388	0.000307057
1695	0.000191229	0.000313987	0.000234524	0.000346011	0.000467955	0.000310741
1696	0.000191229	0.000314376	0.00023507	0.000345863	0.000467171	0.000310742
1697	0.000191284	0.000314182	0.000235207	0.000345788	0.000467171	0.000310726
1698	0.000190287	0.000312693	0.000233614	0.00034349	0.000465604	0.000309138
1699	0.000189511	0.000311917	0.000233068	0.000342749	0.000465604	0.00030857
1700	0.0001894	0.00031114	0.000232658	0.000342156	0.00046482	0.000308035
1701	0.000188624	0.000309911	0.00023193	0.000341044	0.000464036	0.000307109
1702	0.000186795	0.000307516	0.000230291	0.000338004	0.000462468	0.000305015
1703	0.000185797	0.000304669	0.000228289	0.000330442	0.000456198	0.000301079
1704	0.000185464	0.000303569	0.000227697	0.000328885	0.00045463	0.000300049
1705	0.000183469	0.000297292	0.000223647	0.000320729	0.000443656	0.000293759
1706	0.000181085	0.000289914	0.000218322	0.000312426	0.000432682	0.000286886
1707	9.68893e-05	0.000116095	0.000100445	0.000130264	0.000119928	0.000112724
1708	9.8275e-05	0.000116354	0.000100764	0.000130264	0.000118361	0.000112804
1709	8.05933e-05	0.000102052	8.35148e-05	0.000113137	0.000105819	9.70232e-05
1710	3.32572e-05	5.92124e-05	4.76057e-05	6.20551e-05	5.5653e-05	5.15567e-05
1711	5.17704e-05	6.57484e-05	6.05312e-05	7.68089e-05	6.89783e-05	6.47674e-05
1712	5.27681e-05	6.58778e-05	6.16235e-05	7.71055e-05	6.97622e-05	6.54274e-05
1713	5.31561e-05	6.53601e-05	6.1669e-05	7.66607e-05	6.97622e-05	6.53216e-05
1714	4.43984e-05	3.39096e-05	4.39192e-05	5.16014e-05	4.93822e-05	4.46422e-05
1715	5.95858e-05	5.13821e-05	6.59926e-05	7.50296e-05	7.28976e-05	6.49775e-05
1716	6.09161e-05	5.20293e-05	6.82682e-05	7.70314e-05	7.36814e-05	6.63853e-05
1717	5.63155e-05	4.69816e-05	6.26702e-05	6.80604e-05	5.64368e-05	5.80929e-05
1718	5.62601e-05	4.70464e-05	6.26702e-05	6.80604e-05	5.64368e-05	5.80948e-05
1719	5.61492e-05	4.67875e-05	6.26247e-05	6.75414e-05	5.64368e-05	5.79079e-05
1720	5.62601e-05	4.69169e-05	6.27157e-05	6.74673e-05	5.64368e-05	5.79594e-05
1721	5.55395e-05	4.54285e-05	6.11683e-05	6.50948e-05	5.5653e-05	5.65768e-05
1722	5.18812e-05	3.85042e-05	5.43415e-05	6.0424e-05	5.17337e-05	5.13769e-05
1723	5.16595e-05	3.81807e-05	5.4205e-05	6.00533e-05	5.09499e-05	5.10097e-05
1724	4.59504e-05	3.28742e-05	4.76967e-05	5.06376e-05	4.93822e-05	4.53082e-05
1725	5.10498e-05	3.47509e-05	5.22935e-05	5.17496e-05	4.93822e-05	4.78452e-05
1726	5.12161e-05	3.48156e-05	5.2339e-05	5.14531e-05	4.93822e-05	4.78412e-05
1727	5.14378e-05	3.48803e-05	5.31582e-05	5.16755e-05	4.78145e-05	4.77933e-05
1728	5.65927e-05	3.82454e-05	5.82556e-05	5.53084e-05	4.85984e-05	5.14001e-05
1729	5.78675e-05	3.86337e-05	5.89382e-05	5.56791e-05	4.85984e-05	5.19434e-05
1730	5.72578e-05	3.85689e-05	5.7937e-05	5.47894e-05	4.85984e-05	5.14303e-05
1731	5.72578e-05	3.86337e-05	5.7937e-05	5.47894e-05	4.85984e-05	5.14433e-05
1732	5.71469e-05	3.86984e-05	5.78915e-05	5.4567e-05	4.78145e-05	5.12237e-05
1733	5.69807e-05	3.85689e-05	5.76184e-05	5.42704e-05	4.78145e-05	5.10506e-05
1734	4.48972e-05	2.48498e-05	3.9459e-05	3.41044e-05	2.97861e-05	3.46193e-05
1735	4.71144e-05	2.60146e-05	4.1143e-05	3.57354e-05	2.97861e-05	3.59587e-05
1736	4.71144e-05	2.60793e-05	4.11885e-05	3.57354e-05	2.97861e-05	3.59807e-05
1737	4.70035e-05	2.59499e-05	4.09154e-05	3.4994e-05	2.97861e-05	3.57298e-05
1738	4.49526e-05	2.33614e-05	3.58181e-05	2.78766e-05	2.11638e-05	3.06345e-05
1739	2.46103e-05	1.19072e-05	1.93882e-05	1.25296e-05	3.91922e-06	1.44709e-05
1740	4.09064e-05	3.95396e-05	4.36006e-05	4.67823e-05	9.40614e-06	3.6047e-05
1741	4.63384e-05	4.96996e-05	5.4205e-05	6.1462e-05	1.4893e-05	4.53196e-05
1742	4.58949e-05	5.18998e-05	5.61165e-05	6.39086e-05	1.4893e-05	4.65426e-05
1743	4.80566e-05	5.9536e-05	6.09408e-05	7.33244e-05	1.56769e-05	5.15069e-05
1744	5.04955e-05	6.6978e-05	6.58561e-05	8.19987e-05	1.64607e-05	5.63578e-05
1745	5.25464e-05	7.47435e-05	7.01342e-05	9.31939e-05	1.64607e-05	6.14157e-05
1746	5.36549e-05	8.12795e-05	7.31835e-05	0.00010083	1.80284e-05	6.53953e-05
1747	5.10498e-05	8.24444e-05	7.1181e-05	0.000102684	1.72446e-05	6.49208e-05
1748	5.68144e-05	9.62282e-05	8.11937e-05	0.000112693	1.72446e-05	7.28348e-05
1749	5.77012e-05	9.74578e-05	8.2377e-05	0.000113879	1.72446e-05	7.37319e-05
1750	5.7923e-05	9.82343e-05	8.28776e-05	0.000114027	1.72446e-05	7.40613e-05
1751	5.78675e-05	9.82343e-05	8.28776e-05	0.000114027	1.72446e-05	7.40502e-05
1752	5.77567e-05	9.81049e-05	8.27411e-05	0.000114027	1.72446e-05	7.39749e-05
1753	5.77567e-05	9.81049e-05	8.27411e-05	0.000114027	1.72446e-05	7.39749e-05
1754	5.77567e-05	9.81049e-05	8.27411e-05	0.000114027	1.72446e-05	7.39749e-05
1755	5.77567e-05	9.81049e-05	8.27411e-05	0.000114027	1.72446e-05	7.39749e-05
1756	5.74795e-05	9.79755e-05	8.2559e-05	0.000113953	1.72446e-05	7.38423e-05
1757	5.74241e-05	9.79755e-05	8.2559e-05	0.000113879	1.64607e-05	7.36597e-05
1758	5.73687e-05	9.79755e-05	8.25135e-05	0.000113805	1.64607e-05	7.36247e-05
1759	5.73687e-05	9.79755e-05	8.25135e-05	0.000113805	1.64607e-05	7.36247e-05
1760	5.73687e-05	9.79755e-05	8.25135e-05	0.000113805	1.64607e-05	7.36247e-05
1761	5.73687e-05	9.79755e-05	8.2468e-05	0.000113731	1.64607e-05	7.36008e-05
1762	5.73687e-05	9.79755e-05	8.24225e-05	0.000113731	1.64607e-05	7.35917e-05
1763	5.73687e-05	9.79755e-05	8.24225e-05	0.000113656	1.64607e-05	7.35767e-05
1764	5.72578e-05	9.79108e-05	8.2377e-05	0.000113656	1.64607e-05	7.35325e-05
1765	5.72578e-05	9.79108e-05	8.2286e-05	0.000113656	1.64607e-05	7.35143e-05
1766	5.72578e-05	9.77813e-05	8.21949e-05	0.00011336	1.64607e-05	7.34109e-05
1767	5.54841e-05	8.7492e-05	7.46399e-05	0.000102684	1.4893e-05	6.70386e-05
1768	5.47081e-05	8.62624e-05	7.25464e-05	9.92733e-05	1.4893e-05	6.55366e-05
1769	6.65144e-07	1.29426e-06	5.46146e-07	1.03796e-06	7.83845e-07	8.65471e-07
1770	4.97195e-05	9.90109e-05	7.60963e-05	0.000103573	4.70307e-05	7.50861e-05
1771	5.08281e-05	0.000100758	7.77803e-05	0.000105279	4.70307e-05	7.63352e-05
1772	5.08281e-05	0.000100888	7.80533e-05	0.000105427	4.70307e-05	7.64454e-05
1773	5.09389e-05	0.000101017	7.82809e-05	0.000105575	4.70307e-05	7.65685e-05
1774	5.09389e-05	0.000101017	7.83264e-05	0.000105649	4.70307e-05	7.65924e-05
1775	5.09944e-05	0.000101017	7.83264e-05	0.000105649	4.70307e-05	7.66035e-05
1776	5.09944e-05	0.000101017	7.83264e-05	0.000105649	4.70307e-05	7.66035e-05
1777	5.09944e-05	0.000101017	7.83264e-05	0.000105649	4.70307e-05	7.66035e-05
1778	5.09944e-05	0.000101017	7.83264e-05	0.000105649	4.70307e-05	7.66035e-05
1779	5.09944e-05	0.000101017	7.83264e-05	0.000105649	4.70307e-05	7.66035e-05
1780	5.09944e-05	0.000101017	7.83719e-05	0.000105723	4.70307e-05	7.66274e-05
1781	5.10498e-05	0.000101017	7.84629e-05	0.000105723	4.70307e-05	7.66567e-05
1782	5.11052e-05	0.000101017	7.84629e-05	0.000105723	4.70307e-05	7.66678e-05
1783	5.10498e-05	0.000101017	7.84629e-05	0.000105723	4.70307e-05	7.66567e-05
1784	5.10498e-05	0.000101017	7.85085e-05	0.000105723	4.70307e-05	7.66658e-05
1785	5.10498e-05	0.000101082	7.8554e-05	0.000105723	4.70307e-05	7.66879e-05
1786	5.11052e-05	0.000101082	7.85995e-05	0.000105723	4.70307e-05	7.67081e-05
1787	5.11052e-05	0.000101146	7.85995e-05	0.000105649	4.70307e-05	7.67061e-05
1788	5.12161e-05	0.000100952	7.88726e-05	0.000105872	4.70307e-05	7.67887e-05
1789	5.12715e-05	9.71342e-05	7.69155e-05	0.000101942	4.5463e-05	7.45452e-05
1790	5.04401e-05	8.78803e-05	7.06804e-05	9.13404e-05	4.15438e-05	6.8377e-05
1791	4.97195e-05	8.05677e-05	6.69484e-05	8.31108e-05	3.99761e-05	6.40645e-05
1792	4.82784e-05	7.24786e-05	6.15779e-05	7.54744e-05	3.37053e-05	5.83029e-05
1793	4.43984e-05	5.23528e-05	4.81519e-05	5.51601e-05	2.82184e-05	4.56563e-05
1794	2.96543e-05	2.42674e-05	2.70797e-05	2.69128e-05	1.41092e-05	2.44047e-05
1795	3.79686e-05	2.80854e-05	3.01746e-05	2.98784e-05	1.41092e-05	2.80432e-05
1796	3.77469e-05	2.69206e-05	2.90823e-05	2.72093e-05	1.41092e-05	2.70137e-05
1797	3.78578e-05	2.71147e-05	2.92643e-05	2.72093e-05	1.41092e-05	2.71111e-05
1798	3.75252e-05	2.68559e-05	2.83541e-05	2.60972e-05	1.41092e-05	2.65883e-05
1799	2.716e-05	1.29426e-05	1.4928e-05	1.23814e-05	3.13538e-06	1.41095e-05
1800	3.13726e-05	1.50134e-05	1.72946e-05	1.3271e-05	4.70307e-06	1.63309e-05
1801	3.13172e-05	1.50781e-05	1.72946e-05	1.3271e-05	4.70307e-06	1.63328e-05
1802	3.14281e-05	1.50781e-05	1.72491e-05	1.31969e-05	4.70307e-06	1.63311e-05
1803	2.9488e-05	1.33956e-05	1.57472e-05	1.0083e-05	3.13538e-06	1.43698e-05
1804	2.40006e-05	1.12601e-05	1.26524e-05	7.26571e-06	2.35153e-06	1.15061e-05
1805	3.19823e-05	1.38486e-05	1.89786e-05	8.52609e-06	3.13538e-06	1.52942e-05
1806	3.19823e-05	1.37192e-05	1.91606e-05	8.30367e-06	3.13538e-06	1.52602e-05
1807	3.20932e-05	1.37839e-05	1.92061e-05	8.30367e-06	3.13538e-06	1.53045e-05
1808	3.18715e-05	1.37839e-05	1.92972e-05	8.30367e-06	3.13538e-06	1.52783e-05
1809	3.10955e-05	1.29426e-05	1.80683e-05	7.93297e-06	3.13538e-06	1.4635e-05
1810	2.86566e-05	1.25543e-05	1.68395e-05	7.41399e-06	3.13538e-06	1.372e-05
1811	3.65275e-05	1.75372e-05	2.48496e-05	1.06761e-05	3.13538e-06	1.85452e-05
1812	3.69155e-05	1.76019e-05	2.54868e-05	1.07503e-05	3.13538e-06	1.8778e-05
1813	3.40332e-05	1.60488e-05	2.38484e-05	9.86061e-06	3.13538e-06	1.73853e-05
1814	4.43984e-05	2.7956e-05	4.34186e-05	1.58659e-05	3.13538e-06	2.69549e-05
1815	4.46201e-05	2.82149e-05	4.38282e-05	1.60884e-05	3.13538e-06	2.71774e-05
1816	4.45646e-05	2.82796e-05	4.38737e-05	1.60884e-05	3.13538e-06	2.71883e-05
1817	4.44538e-05	2.82796e-05	4.39192e-05	1.60884e-05	3.13538e-06	2.71753e-05
1818	4.43429e-05	2.82149e-05	4.40102e-05	1.60884e-05	3.13538e-06	2.71584e-05
1819	4.27355e-05	2.65323e-05	4.23263e-05	1.51987e-05	2.35153e-06	2.58289e-05
1820	4.52298e-05	2.7503e-05	4.54666e-05	1.61625e-05	2.35153e-06	2.73427e-05
1821	4.46755e-05	2.72442e-05	4.51481e-05	1.60142e-05	2.35153e-06	2.70867e-05
1822	3.99641e-05	2.46557e-05	4.32365e-05	1.45314e-05	1.56769e-06	2.47911e-05
1823	5.33778e-05	4.33577e-05	6.09408e-05	2.89887e-05	5.48691e-06	3.84304e-05
1824	5.39875e-05	4.36813e-05	6.16235e-05	2.97301e-05	5.48691e-06	3.89019e-05
1825	5.47635e-05	4.43284e-05	6.25337e-05	3.06198e-05	5.48691e-06	3.95465e-05
1826	5.48189e-05	4.45873e-05	6.27613e-05	3.08422e-05	5.48691e-06	3.96993e-05
1827	5.48189e-05	4.43931e-05	6.27613e-05	3.09905e-05	5.48691e-06	3.96901e-05
1828	5.49298e-05	4.47167e-05	6.30343e-05	3.10646e-05	5.48691e-06	3.98465e-05
1829	5.48744e-05	4.47167e-05	6.31254e-05	3.09905e-05	5.48691e-06	3.98388e-05
1830	5.58721e-05	4.51697e-05	6.51734e-05	3.11388e-05	5.48691e-06	4.05682e-05
1831	5.58167e-05	4.51697e-05	6.52189e-05	3.10646e-05	5.48691e-06	4.05514e-05
1832	5.69252e-05	4.56227e-05	6.65843e-05	3.15095e-05	5.48691e-06	4.12257e-05
1833	5.70915e-05	4.57521e-05	6.67208e-05	3.15836e-05	5.48691e-06	4.1327e-05
1834	5.69252e-05	4.54932e-05	6.63567e-05	3.12129e-05	5.48691e-06	4.1095e-05
1835	5.65927e-05	4.52344e-05	6.60381e-05	3.08422e-05	5.48691e-06	4.08389e-05
1836	5.80338e-05	4.63345e-05	6.7449e-05	3.17319e-05	5.48691e-06	4.18072e-05
1837	5.82001e-05	4.65286e-05	6.75855e-05	3.17319e-05	5.48691e-06	4.19066e-05
1838	5.8311e-05	4.65934e-05	6.76311e-05	3.17319e-05	5.48691e-06	4.19509e-05
1839	5.83664e-05	4.65934e-05	6.754e-05	3.17319e-05	5.48691e-06	4.19437e-05
1840	5.82555e-05	4.65286e-05	6.754e-05	3.16577e-05	5.48691e-06	4.18937e-05
1841	5.8311e-05	4.65934e-05	6.77676e-05	3.16577e-05	5.48691e-06	4.19633e-05
1842	5.84772e-05	4.65934e-05	6.79496e-05	3.15095e-05	5.48691e-06	4.20033e-05
1843	5.83664e-05	4.63992e-05	6.78131e-05	3.14353e-05	5.48691e-06	4.19002e-05
1844	5.82001e-05	4.62698e-05	6.77221e-05	3.13612e-05	5.48691e-06	4.1808e-05
1845	5.80892e-05	4.62051e-05	6.754e-05	3.1287e-05	5.48691e-06	4.17216e-05
1846	5.77012e-05	4.56227e-05	6.72214e-05	3.06939e-05	4.70307e-06	4.11885e-05
1847	5.76458e-05	4.56227e-05	6.71759e-05	3.06939e-05	4.70307e-06	4.11683e-05
1848	5.54841e-05	4.30989e-05	6.3808e-05	2.70611e-05	4.70307e-06	3.8831e-05
1849	5.52624e-05	4.30341e-05	6.3808e-05	2.69869e-05	4.70307e-06	3.87589e-05
1850	5.35441e-05	4.07692e-05	6.06677e-05	2.47627e-05	4.70307e-06	3.68894e-05
1851	5.22138e-05	3.93455e-05	5.83011e-05	2.3873e-05	3.13538e-06	3.53738e-05
1852	1.0088e-05	3.75335e-06	5.91658e-06	2.52076e-06	1.56769e-06	4.76928e-06
1853	1.60189e-05	4.40048e-06	8.01014e-06	2.9656e-06	2.35153e-06	6.74933e-06
1854	1.61297e-05	4.4652e-06	8.01014e-06	2.9656e-06	2.35153e-06	6.78443e-06
1855	1.26932e-05	3.4945e-06	6.0076e-06	2.00178e-06	1.56769e-06	5.15295e-06
1856	2.5608e-05	7.11843e-06	1.45184e-05	3.78113e-06	1.56769e-06	1.05187e-05
1857	2.6772e-05	7.442e-06	1.54741e-05	4.00355e-06	1.56769e-06	1.10519e-05
1858	2.68275e-05	7.442e-06	1.52921e-05	3.92941e-06	1.56769e-06	1.10117e-05
1859	2.71046e-05	7.37728e-06	1.54741e-05	4.00355e-06	1.56769e-06	1.11054e-05
1860	2.72709e-05	7.50671e-06	1.56107e-05	4.07769e-06	1.56769e-06	1.12067e-05
1861	2.76589e-05	7.50671e-06	1.57472e-05	4.07769e-06	1.56769e-06	1.13116e-05
1862	2.78806e-05	7.37728e-06	1.59293e-05	4.30011e-06	1.56769e-06	1.1411e-05
1863	2.80469e-05	7.31257e-06	1.57017e-05	4.15183e-06	1.56769e-06	1.13561e-05
1864	2.80469e-05	7.11843e-06	1.56107e-05	4.30011e-06	2.35153e-06	1.14855e-05
1865	2.72709e-05	6.73015e-06	1.50645e-05	4.15183e-06	2.35153e-06	1.11138e-05
1866	2.74926e-05	6.14774e-06	1.44729e-05	3.92941e-06	2.35153e-06	1.08788e-05
1867	4.68926e-05	1.19719e-05	2.56233e-05	9.78647e-06	8.62229e-06	2.05793e-05
1868	4.76132e-05	1.20366e-05	2.58509e-05	9.86061e-06	8.62229e-06	2.07967e-05
1869	4.83892e-05	1.21013e-05	2.61695e-05	9.93475e-06	8.62229e-06	2.10434e-05
1870	4.85001e-05	1.21013e-05	2.61695e-05	1.00089e-05	8.62229e-06	2.10804e-05
1871	4.85001e-05	1.21013e-05	2.61695e-05	1.00089e-05	8.62229e-06	2.10804e-05
1872	4.73915e-05	1.15836e-05	2.49407e-05	9.63819e-06	8.62229e-06	2.04353e-05
1873	6.4907e-05	2.54969e-05	4.1234e-05	2.95077e-05	2.27315e-05	3.67754e-05
1874	6.51287e-05	2.54969e-05	4.16436e-05	2.95818e-05	2.27315e-05	3.69165e-05
1875	6.51841e-05	2.58205e-05	4.17802e-05	2.97301e-05	2.27315e-05	3.70493e-05
1876	6.52395e-05	2.58205e-05	4.18257e-05	2.97301e-05	2.27315e-05	3.70695e-05
1877	6.51287e-05	2.58205e-05	4.18257e-05	2.97301e-05	2.27315e-05	3.70473e-05
1878	6.35212e-05	2.44615e-05	3.95501e-05	2.93594e-05	2.27315e-05	3.59247e-05
1879	6.20247e-05	2.42027e-05	3.86398e-05	2.94335e-05	2.27315e-05	3.54064e-05
1880	6.24681e-05	2.42027e-05	3.86853e-05	2.9656e-05	2.27315e-05	3.55487e-05
1881	6.25235e-05	2.42027e-05	3.86398e-05	2.95077e-05	2.27315e-05	3.5521e-05
1882	5.77012e-05	2.31673e-05	3.56815e-05	2.92853e-05	2.27315e-05	3.37134e-05
1883	6.35212e-05	2.46557e-05	3.98686e-05	3.1287e-05	2.66507e-05	3.71966e-05
1884	6.32995e-05	2.45262e-05	3.97321e-05	3.1287e-05	2.66507e-05	3.70991e-05
1885	6.3355e-05	2.45262e-05	3.96866e-05	3.1287e-05	2.66507e-05	3.71011e-05
1886	5.69252e-05	2.21318e-05	3.40886e-05	2.97301e-05	2.42992e-05	3.3435e-05
1887	6.00847e-05	2.34908e-05	3.72745e-05	3.08422e-05	2.5083e-05	3.5355e-05
1888	6.00847e-05	2.35555e-05	3.73655e-05	3.07681e-05	2.5083e-05	3.53714e-05
1889	6.00847e-05	2.35555e-05	3.732e-05	3.06939e-05	2.5083e-05	3.53474e-05
1890	5.96967e-05	2.35555e-05	3.72745e-05	3.06198e-05	2.5083e-05	3.52459e-05
1891	5.9475e-05	2.35555e-05	3.72289e-05	3.04715e-05	2.5083e-05	3.51628e-05
1892	5.9475e-05	2.34908e-05	3.71834e-05	3.03974e-05	2.5083e-05	3.51259e-05
1893	5.17704e-05	1.92845e-05	3.20861e-05	2.543e-05	2.5083e-05	3.07308e-05
1894	4.08509e-05	1.51428e-05	2.6124e-05	1.98695e-05	2.27315e-05	2.49437e-05
1895	3.94098e-05	1.46899e-05	2.53503e-05	1.93505e-05	2.27315e-05	2.43064e-05
1896	2.06749e-05	5.17704e-06	1.25614e-05	6.74673e-06	7.0546e-06	1.04429e-05
1897	2.73263e-05	6.53601e-06	1.56562e-05	8.89679e-06	8.62229e-06	1.34075e-05
1898	2.71046e-05	6.40659e-06	1.53376e-05	8.30367e-06	8.62229e-06	1.3155e-05
1899	2.62732e-05	6.60073e-06	1.48825e-05	8.37781e-06	1.019e-05	1.32648e-05
1900	2.64949e-05	6.60073e-06	1.5019e-05	8.37781e-06	1.09738e-05	1.34932e-05
1901	2.64395e-05	6.66544e-06	1.53376e-05	8.22953e-06	1.09738e-05	1.35292e-05
1902	2.64949e-05	6.40659e-06	1.51555e-05	8.08125e-06	9.40614e-06	1.31089e-05
1903	2.00652e-05	5.11233e-06	1.08319e-05	6.07947e-06	5.48691e-06	9.51516e-06
1904	3.10401e-05	1.04835e-05	1.98433e-05	1.12693e-05	6.27076e-06	1.57814e-05
1905	3.12063e-05	1.06776e-05	2.00709e-05	1.13434e-05	6.27076e-06	1.59138e-05
1906	3.09292e-05	1.06129e-05	2.00709e-05	1.11951e-05	6.27076e-06	1.58158e-05
1907	3.12618e-05	1.11306e-05	2.08446e-05	1.14175e-05	6.27076e-06	1.61851e-05
1908	3.12063e-05	1.12601e-05	2.08446e-05	1.15658e-05	6.27076e-06	1.62295e-05
1909	3.09846e-05	1.09365e-05	2.0708e-05	1.13434e-05	6.27076e-06	1.60487e-05
1910	3.10401e-05	1.10012e-05	2.0708e-05	1.13434e-05	6.27076e-06	1.60727e-05
1911	3.05966e-05	1.08718e-05	2.0435e-05	1.11951e-05	6.27076e-06	1.58739e-05
1912	2.93218e-05	1.06776e-05	1.91606e-05	1.0602e-05	6.27076e-06	1.52066e-05
1913	2.60515e-05	9.90109e-06	1.79318e-05	1.0083e-05	5.48691e-06	1.38909e-05
1914	3.33126e-05	1.14542e-05	2.16183e-05	1.17882e-05	5.48691e-06	1.6732e-05
1915	3.35898e-05	1.14542e-05	2.17093e-05	1.17141e-05	5.48691e-06	1.67909e-05
1916	3.37006e-05	1.13895e-05	2.18003e-05	1.17141e-05	5.48691e-06	1.68183e-05
1917	3.24812e-05	1.09365e-05	2.06625e-05	1.08986e-05	4.70307e-06	1.59364e-05
1918	3.0264e-05	1.06129e-05	1.97523e-05	1.00089e-05	2.35153e-06	1.45979e-05
1919	3.76361e-05	1.35897e-05	2.39849e-05	1.49763e-05	3.13538e-06	1.86645e-05
1920	3.78578e-05	1.3525e-05	2.40759e-05	1.49021e-05	3.13538e-06	1.86992e-05
1921	3.87446e-05	1.40427e-05	2.444e-05	1.60884e-05	3.13538e-06	1.92902e-05
1922	4.02412e-05	1.46899e-05	2.6306e-05	1.77194e-05	3.91922e-06	2.05751e-05
1923	4.10172e-05	1.47546e-05	2.6397e-05	1.79419e-05	3.91922e-06	2.0806e-05
1924	4.07955e-05	1.45604e-05	2.58054e-05	1.74229e-05	3.91922e-06	2.05007e-05
1925	4.04629e-05	1.41074e-05	2.53958e-05	1.73487e-05	3.91922e-06	2.02468e-05
1926	4.05184e-05	1.41074e-05	2.53503e-05	1.72746e-05	3.91922e-06	2.0234e-05
1927	4.00749e-05	1.3978e-05	2.47586e-05	1.68298e-05	3.91922e-06	1.99121e-05
1928	3.76361e-05	1.26837e-05	2.21644e-05	1.47538e-05	2.35153e-06	1.79179e-05
1929	3.79132e-05	1.27485e-05	2.22099e-05	1.47538e-05	2.35153e-06	1.79954e-05
1930	3.78578e-05	1.2619e-05	2.18458e-05	1.46797e-05	2.35153e-06	1.78708e-05
1931	3.69155e-05	1.08718e-05	1.99343e-05	1.379e-05	2.35153e-06	1.67726e-05
1932	3.69155e-05	1.08071e-05	1.99343e-05	1.37159e-05	2.35153e-06	1.67449e-05
1933	3.69155e-05	1.08071e-05	1.98888e-05	1.37159e-05	2.35153e-06	1.67358e-05
1934	3.41441e-05	9.64224e-06	1.70215e-05	1.26779e-05	2.35153e-06	1.51675e-05
1935	3.20378e-05	9.12453e-06	1.58837e-05	1.26038e-05	2.35153e-06	1.44003e-05
1936	2.9876e-05	8.73626e-06	1.52011e-05	1.22331e-05	2.35153e-06	1.36796e-05
1937	2.8712e-05	8.41269e-06	1.46549e-05	1.19365e-05	2.35153e-06	1.32135e-05
1938	2.54972e-05	6.989e-06	1.19242e-05	1.04537e-05	1.56769e-06	1.12864e-05
1939	2.23378e-05	5.56532e-06	9.55755e-06	8.74851e-06	1.56769e-06	9.55537e-06
1940	2.18943e-05	5.50061e-06	9.23897e-06	8.37781e-06	1.56769e-06	9.31588e-06
1941	1.55755e-05	3.17094e-06	5.50697e-06	5.18979e-06	1.56769e-06	6.20218e-06
1942	7.1503e-06	1.55311e-06	1.866e-06	1.8535e-06	7.83845e-07	2.64135e-06
1943	7.20573e-06	1.55311e-06	1.91151e-06	1.77936e-06	0	2.48994e-06
1944	2.10629e-06	7.11843e-07	6.82682e-07	4.44839e-07	0	7.89131e-07
1945	3.43658e-06	9.70695e-07	1.36536e-06	1.03796e-06	0	1.36212e-06
1946	4.71144e-06	1.42369e-06	1.95702e-06	1.55694e-06	0	1.92982e-06
1947	4.15715e-06	1.16483e-06	1.72946e-06	1.4828e-06	0	1.70685e-06
1948	1.20834e-05	2.91209e-06	3.82302e-06	3.41044e-06	1.56769e-06	4.75933e-06
1949	1.23606e-05	2.84737e-06	3.95956e-06	3.48458e-06	1.56769e-06	4.84396e-06
1950	1.24714e-05	2.84737e-06	3.95956e-06	3.48458e-06	1.56769e-06	4.86612e-06
1951	1.24714e-05	2.84737e-06	3.95956e-06	3.48458e-06	1.56769e-06	4.86612e-06
1952	1.26932e-05	2.91209e-06	3.95956e-06	3.55872e-06	1.56769e-06	4.93825e-06
1953	1.26932e-05	2.9768e-06	3.91404e-06	3.55872e-06	1.56769e-06	4.94209e-06
1954	2.20606e-05	1.07424e-05	1.43818e-05	1.09727e-05	3.13538e-06	1.22586e-05
1955	2.23932e-05	1.08071e-05	1.45639e-05	1.1121e-05	3.13538e-06	1.24041e-05
1956	2.26703e-05	1.11306e-05	1.47004e-05	1.1121e-05	3.13538e-06	1.25515e-05
1957	2.27812e-05	1.11953e-05	1.48825e-05	1.12693e-05	3.13538e-06	1.26527e-05
1958	2.27812e-05	1.12601e-05	1.48825e-05	1.12693e-05	3.13538e-06	1.26657e-05
1959	2.27812e-05	1.12601e-05	1.48825e-05	1.12693e-05	3.13538e-06	1.26657e-05
1960	2.27812e-05	1.12601e-05	1.48825e-05	1.12693e-05	3.13538e-06	1.26657e-05
1961	2.24486e-05	1.12601e-05	1.4837e-05	1.12693e-05	3.13538e-06	1.25901e-05
1962	2.26149e-05	1.12601e-05	1.4928e-05	1.12693e-05	3.13538e-06	1.26415e-05
1963	2.26149e-05	1.12601e-05	1.4928e-05	1.12693e-05	3.13538e-06	1.26415e-05
1964	2.25595e-05	1.11306e-05	1.4837e-05	1.1121e-05	3.13538e-06	1.25567e-05
1965	2.07857e-05	1.06129e-05	1.39267e-05	1.02313e-05	3.13538e-06	1.17384e-05
1966	2.41669e-05	1.12601e-05	1.53831e-05	1.07503e-05	3.13538e-06	1.29392e-05
1967	2.43886e-05	1.13248e-05	1.53831e-05	1.06761e-05	3.13538e-06	1.29816e-05
1968	2.43886e-05	1.13248e-05	1.53831e-05	1.06761e-05	3.13538e-06	1.29816e-05
1969	2.43332e-05	1.13248e-05	1.53831e-05	1.06761e-05	3.13538e-06	1.29705e-05
1970	2.42223e-05	1.13248e-05	1.53831e-05	1.06761e-05	3.13538e-06	1.29483e-05
1971	2.38898e-05	1.13248e-05	1.53376e-05	1.03796e-05	3.13538e-06	1.28134e-05
1972	2.38898e-05	1.13248e-05	1.53831e-05	1.03796e-05	3.13538e-06	1.28225e-05
1973	2.38343e-05	1.10659e-05	1.52466e-05	9.86061e-06	3.13538e-06	1.26286e-05
1974	2.24486e-05	9.31867e-06	1.33351e-05	8.45195e-06	3.13538e-06	1.13379e-05
1975	2.00652e-05	7.9597e-06	1.1105e-05	6.67259e-06	3.13538e-06	9.78757e-06
1976	1.7848e-05	6.73015e-06	9.55755e-06	5.85705e-06	3.13538e-06	8.62563e-06
1977	8.48059e-06	2.0061e-06	2.68522e-06	1.03796e-06	1.56769e-06	3.15551e-06
1978	9.25659e-06	2.07082e-06	2.73073e-06	1.77936e-06	7.83845e-07	3.32427e-06
1979	8.97944e-06	2.0061e-06	2.6397e-06	1.70522e-06	7.83845e-07	3.22286e-06
1980	6.59601e-06	1.4884e-06	2.27561e-06	1.4828e-06	7.83845e-07	2.52533e-06
1981	8.81316e-06	1.94139e-06	3.14034e-06	1.55694e-06	1.56769e-06	3.4039e-06
1982	8.81316e-06	1.94139e-06	3.14034e-06	1.55694e-06	1.56769e-06	3.4039e-06
1983	8.36973e-06	1.87668e-06	2.91278e-06	1.55694e-06	1.56769e-06	3.25676e-06
1984	1.06423e-05	2.13553e-06	3.77751e-06	2.37248e-06	1.56769e-06	4.0991e-06
1985	1.06977e-05	2.13553e-06	3.77751e-06	2.37248e-06	1.56769e-06	4.11018e-06
1986	9.14573e-06	1.74725e-06	3.0038e-06	2.15006e-06	1.56769e-06	3.52291e-06
1987	1.26377e-05	2.71795e-06	5.14287e-06	3.26216e-06	1.56769e-06	5.06567e-06
1988	1.26932e-05	2.78266e-06	5.14287e-06	3.26216e-06	1.56769e-06	5.08972e-06
1989	1.26377e-05	2.71795e-06	5.09736e-06	3.26216e-06	1.56769e-06	5.05657e-06
1990	1.26377e-05	2.71795e-06	5.09736e-06	3.26216e-06	1.56769e-06	5.05657e-06
1991	1.25823e-05	2.71795e-06	5.09736e-06	3.26216e-06	1.56769e-06	5.04549e-06
1992	1.15846e-05	2.71795e-06	4.77878e-06	3.11388e-06	1.56769e-06	4.75258e-06
1993	1.30812e-05	3.17094e-06	5.96209e-06	3.78113e-06	1.56769e-06	5.51261e-06
1994	1.30257e-05	3.17094e-06	6.0076e-06	3.78113e-06	1.56769e-06	5.51061e-06
1995	1.30812e-05	3.17094e-06	6.0076e-06	3.78113e-06	1.56769e-06	5.52171e-06
1996	1.2416e-05	2.91209e-06	5.64351e-06	3.63286e-06	1.56769e-06	5.23443e-06
1997	1.29703e-05	3.17094e-06	6.0076e-06	3.85527e-06	1.56769e-06	5.51436e-06
1998	1.31366e-05	3.17094e-06	6.0076e-06	3.92941e-06	1.56769e-06	5.56245e-06
1999	1.19726e-05	2.91209e-06	5.78004e-06	3.55872e-06	1.56769e-06	5.15823e-06
[truncated: 7,180 more rows]

## Sheet: CANC_K158A
bp	CLIP33_density	CLIP46_density	CLIP48_density	CLIP51_density	average
1	8.58921e-06	4.34334e-06	3.06077e-06	0	3.99833e-06
2	1.54401e-05	8.16737e-06	3.72616e-06	0	6.83341e-06
3	1.61559e-05	9.67809e-06	4.39154e-06	0	7.55638e-06
4	2.09618e-05	1.21802e-05	4.92385e-06	0	9.51646e-06
5	2.15753e-05	1.31716e-05	4.92385e-06	0	9.91769e-06
6	2.28023e-05	1.3691e-05	4.92385e-06	0	1.03543e-05
7	2.38248e-05	1.37854e-05	4.92385e-06	0	1.06335e-05
8	2.84262e-05	1.58626e-05	5.45616e-06	6.1184e-07	1.25892e-05
9	3.27208e-05	1.83648e-05	5.45616e-06	6.1184e-07	1.42884e-05
10	3.85492e-05	2.10558e-05	6.3877e-06	6.1184e-07	1.66511e-05
11	4.03897e-05	2.2e-05	6.65385e-06	6.1184e-07	1.74138e-05
12	4.07987e-05	2.2236e-05	6.65385e-06	6.1184e-07	1.75751e-05
13	4.131e-05	2.25193e-05	6.65385e-06	6.1184e-07	1.77737e-05
14	6.69754e-05	3.80986e-05	1.37069e-05	2.4474e-06	3.03071e-05
15	6.87137e-05	3.8618e-05	1.37069e-05	2.4474e-06	3.08715e-05
16	6.92249e-05	3.91373e-05	1.39731e-05	2.4474e-06	3.11957e-05
17	6.97362e-05	3.95149e-05	1.39731e-05	2.4474e-06	3.14179e-05
18	7.01452e-05	3.98454e-05	1.41062e-05	2.4474e-06	3.1636e-05
19	7.89389e-05	4.65493e-05	2.00946e-05	4.2829e-06	3.74664e-05
20	7.96547e-05	4.68797e-05	1.99616e-05	4.2829e-06	3.76947e-05
21	8.08817e-05	4.84849e-05	2.02277e-05	4.2829e-06	3.84693e-05
22	7.90412e-05	4.84377e-05	2.03608e-05	4.2829e-06	3.80306e-05
23	9.93894e-05	5.95321e-05	2.18246e-05	9.1777e-06	4.74809e-05
24	0.000139575	7.19011e-05	2.56839e-05	1.2237e-05	6.23491e-05
25	0.000145608	7.33647e-05	2.55508e-05	1.3461e-05	6.44959e-05
26	0.000147857	7.45449e-05	2.56839e-05	1.3461e-05	6.53866e-05
27	0.000148573	7.55835e-05	2.595e-05	1.3461e-05	6.58917e-05
28	0.000148266	7.52531e-05	2.595e-05	1.3461e-05	6.57324e-05
29	0.000149595	7.54891e-05	2.595e-05	1.3461e-05	6.61238e-05
30	0.000128225	6.4914e-05	2.35546e-05	1.3461e-05	5.75385e-05
31	0.000254097	0.000124965	2.91439e-05	1.5296e-05	0.000105876
32	0.000270458	0.000134738	2.95431e-05	1.5296e-05	0.000112509
33	0.000276695	0.000139742	2.87446e-05	1.5296e-05	0.00011512
34	0.000283648	0.000142716	2.88777e-05	1.5296e-05	0.000117635
35	0.000284875	0.000143519	2.87446e-05	1.5296e-05	0.000118109
36	0.00028416	0.000143283	2.86116e-05	1.4684e-05	0.000117685
37	0.000294589	0.000146493	2.88777e-05	1.5296e-05	0.000121314
38	0.000311052	0.000154897	3.07408e-05	1.8967e-05	0.000128914
39	0.000318517	0.000156643	3.08739e-05	1.9579e-05	0.000131403
40	0.000318517	0.000156832	3.03416e-05	2.0803e-05	0.000131623
41	0.000317187	0.000153386	2.92769e-05	2.0803e-05	0.000130163
42	0.000318312	0.000154047	2.92769e-05	2.0803e-05	0.00013061
43	0.000318005	0.000154094	2.92769e-05	2.0803e-05	0.000130545
44	0.000312279	0.000151356	2.79462e-05	2.0191e-05	0.000127943
45	0.000285796	0.000136485	2.03608e-05	1.8355e-05	0.000115249
46	0.000300725	0.000144888	2.20908e-05	1.8967e-05	0.000121668
47	0.000303894	0.000147532	2.23569e-05	1.8967e-05	0.000123188
48	0.000302565	0.000146304	2.16916e-05	1.8967e-05	0.000122382
49	0.000301031	0.000145313	2.10262e-05	1.8967e-05	0.000121584
50	0.000310745	0.000153292	2.19577e-05	1.9579e-05	0.000126393
51	0.000309723	0.000153386	2.19577e-05	1.9579e-05	0.000126161
52	0.000309825	0.000153386	2.19577e-05	1.9579e-05	0.000126187
53	0.000309518	0.000153386	2.16916e-05	1.9579e-05	0.000126044
54	0.000309109	0.000153244	2.15585e-05	1.9579e-05	0.000125873
55	0.000308905	0.000153244	2.15585e-05	1.9579e-05	0.000125822
56	0.000298373	0.000148571	2.02277e-05	1.8967e-05	0.000121535
57	0.000283342	0.000141725	1.74331e-05	1.8355e-05	0.000115214
58	0.00021473	0.000117695	1.26423e-05	1.0401e-05	8.88672e-05
59	0.000214219	0.000117317	1.27754e-05	1.0401e-05	8.86783e-05
60	0.000174852	0.000104193	1.07792e-05	8.5658e-06	7.45974e-05
61	0.000147244	9.01715e-05	9.98078e-06	6.7303e-06	6.35315e-05
62	0.000141006	8.71028e-05	9.58154e-06	6.1184e-06	6.09522e-05
63	0.000132519	8.44591e-05	9.04924e-06	6.1184e-06	5.80365e-05
64	0.00012802	8.23818e-05	9.18231e-06	5.5066e-06	5.62727e-05
65	0.000107263	6.20814e-05	7.31924e-06	4.2829e-06	4.52366e-05
66	0.000109717	6.69913e-05	7.45231e-06	4.2829e-06	4.71109e-05
67	0.000109615	6.68497e-05	7.45231e-06	3.6711e-06	4.68969e-05
68	0.000108899	6.62831e-05	7.45231e-06	3.6711e-06	4.65764e-05
69	7.50533e-05	5.22617e-05	6.52077e-06	3.6711e-06	3.43767e-05
70	7.03497e-05	5.07038e-05	6.52077e-06	3.6711e-06	3.28113e-05
71	6.51348e-05	4.65493e-05	6.52077e-06	3.6711e-06	3.0469e-05
72	4.43776e-05	3.33776e-05	4.79077e-06	3.0592e-06	2.14013e-05
73	5.05127e-05	3.7721e-05	5.98847e-06	2.4474e-06	2.41674e-05
74	5.75682e-05	4.38583e-05	8.65001e-06	1.8355e-06	2.7978e-05
75	4.31506e-05	3.49828e-05	9.04924e-06	6.1184e-07	2.19486e-05
76	0.000161968	0.000142292	8.99601e-05	0.00012359	0.000129453
77	0.000163502	0.000145455	9.1557e-05	0.00013277	0.000133321
78	0.000163502	0.000145549	9.20893e-05	0.00013277	0.000133478
79	0.000163502	0.00014536	9.20893e-05	0.00013277	0.00013343
80	0.000160843	0.000144699	9.18231e-05	0.00013277	0.000132534
81	0.000164115	0.000146446	9.58154e-05	0.00013766	0.00013601
82	0.000166876	0.000147013	9.8477e-05	0.00014868	0.000140261
83	0.000171273	0.000150553	0.000104732	0.00015113	0.000144421
84	0.000168308	0.000149231	0.000105264	0.00015113	0.000143482
85	0.000191826	0.000170523	0.000154902	0.00022883	0.00018652
86	0.000199188	0.000177369	0.000169008	0.00024596	0.000197881
87	0.000204914	0.000179682	0.000177392	0.00025453	0.000204129
88	0.000227716	0.000197764	0.000209862	0.00029124	0.000231645
89	0.000228637	0.00019951	0.000212125	0.00030042	0.000235172
90	0.000229864	0.000200171	0.00021279	0.00030225	0.000236269
91	0.000228739	0.000198613	0.00021279	0.00030225	0.000235598
92	0.000235385	0.000203193	0.000219045	0.00030776	0.000241345
93	0.000232727	0.000200596	0.000218246	0.00030898	0.000240138
94	0.000226285	0.000195261	0.000216782	0.00030898	0.000236827
95	0.000185895	0.000162356	0.000206669	0.00030959	0.000216128
96	0.000241214	0.000205176	0.000303283	0.00041544	0.000291278
97	0.000295816	0.00026721	0.000339213	0.00047601	0.000344563
98	0.000298271	0.000269618	0.000340544	0.00047724	0.000346417
99	0.000297862	0.000269381	0.000341343	0.00047724	0.000346456
100	0.00029009	0.000262253	0.000343871	0.00047724	0.000343363
101	0.000577624	0.000540132	0.000833461	0.00099486	0.000736519
102	0.000587543	0.000556325	0.000847168	0.00100954	0.000750144
103	0.00060513	0.000581158	0.000877909	0.00103463	0.000774706
104	0.00070953	0.000680535	0.00108817	0.00124449	0.000930681
105	0.000720267	0.00069517	0.00110387	0.00125979	0.000944774
106	0.000796036	0.000748093	0.00115511	0.00136502	0.00101607
107	0.000799512	0.000753144	0.00115883	0.00136808	0.00101989
108	0.000822928	0.000778071	0.00117946	0.00138705	0.00104188
109	0.000821496	0.000777411	0.0011788	0.00138766	0.00104134
110	0.000830904	0.000789827	0.00119317	0.00139561	0.00105238
111	0.000838675	0.00080517	0.00119956	0.00140051	0.00106098
112	0.000846957	0.000819097	0.00120222	0.00140173	0.0010675
113	0.000842049	0.000813621	0.00120115	0.00140173	0.00106464
114	0.00084481	0.000816548	0.00120035	0.00140296	0.00106617
115	0.000840822	0.000811449	0.00119357	0.00138827	0.00105853
116	0.000850638	0.000817634	0.00119729	0.00139011	0.00106392
117	0.000841538	0.000809136	0.00118611	0.00138399	0.0010552
118	0.000831313	0.000798372	0.0011776	0.0013742	0.00104537
119	0.000841742	0.000804368	0.00118092	0.00137481	0.00105046
120	0.000807488	0.000767544	0.00114287	0.0013589	0.0010192
121	0.000819349	0.000769526	0.00114047	0.00135646	0.00102145
122	0.000790309	0.000729492	0.00110826	0.00133871	0.000991695
123	0.000793991	0.00072784	0.00110321	0.00133871	0.000990938
124	0.000793991	0.00072817	0.00110294	0.00133871	0.000990954
125	0.000755237	0.000710466	0.00108924	0.00133382	0.000972189
126	0.00066822	0.000644278	0.0010187	0.00128609	0.000904324
127	0.000638056	0.000609437	0.000979447	0.00124694	0.000868469
128	0.000585907	0.000542398	0.000897871	0.00114659	0.000793193
129	0.000585089	0.000538668	0.000896274	0.00114659	0.000791656
130	0.000573841	0.000521484	0.000874183	0.00112212	0.000772907
131	0.00029326	0.000209283	0.000441949	0.00051884	0.000365834
132	0.000311563	0.000222218	0.000438622	0.00050599	0.0003696
133	0.000313404	0.000224626	0.000431436	0.00049743	0.000366724
134	0.000279149	0.000191721	0.000290241	0.00031571	0.000269206
135	0.000217184	0.000133558	0.000133875	0.0001499	0.00015863
136	0.000230068	0.000149279	0.000136537	0.0001499	0.000166446
137	0.00021606	0.000137429	0.000110055	0.00012482	0.00014709
138	0.000216162	0.000137665	0.000110055	0.00012482	0.000147174
139	0.00021606	0.000137571	0.000109789	0.00012482	0.000147059
140	0.000215753	0.000137429	0.000109123	0.00012482	0.00014678
141	0.00021064	0.000133369	0.00010207	0.00012053	0.000141653
142	0.000201642	0.000126571	9.23554e-05	9.9119e-05	0.000129922
143	0.000193462	0.000122322	8.2907e-05	8.9329e-05	0.000122005
144	0.000189269	0.000121	8.10439e-05	8.5658e-05	0.000119243
145	0.000174545	0.000111322	6.60062e-05	6.0573e-05	0.000103111
146	0.000127713	8.6017e-05	4.16531e-05	4.4053e-05	7.4859e-05
147	0.00013845	9.37123e-05	4.73754e-05	4.4665e-05	8.10505e-05
148	0.000138245	9.33818e-05	4.69762e-05	4.4665e-05	8.0817e-05
149	0.000137734	9.33346e-05	4.68431e-05	4.4665e-05	8.06441e-05
150	0.000122601	8.54977e-05	3.93908e-05	4.1605e-05	7.22736e-05
151	9.55038e-05	7.53475e-05	2.84785e-05	1.5296e-05	5.36565e-05
152	7.73029e-05	7.006e-05	2.26231e-05	9.1777e-06	4.47909e-05
153	7.2088e-05	6.76522e-05	2.31554e-05	1.2237e-05	4.37831e-05
154	7.03497e-05	6.45836e-05	2.51516e-05	1.5296e-05	4.38452e-05
155	6.21695e-05	5.46694e-05	2.47523e-05	1.4684e-05	3.90689e-05
156	4.2946e-05	3.29527e-05	2.02277e-05	1.1013e-05	2.67849e-05
157	9.22317e-05	6.61887e-05	4.21854e-05	2.6309e-05	5.67288e-05
158	9.3561e-05	6.68024e-05	4.25846e-05	2.6309e-05	5.73143e-05
159	9.2334e-05	6.60471e-05	4.27177e-05	2.6309e-05	5.6852e-05
160	9.22317e-05	6.52917e-05	4.325e-05	2.7533e-05	5.70766e-05
161	0.000115648	8.66307e-05	6.12154e-05	3.7322e-05	7.5204e-05
162	0.00011759	8.77638e-05	6.2147e-05	3.7322e-05	7.62059e-05
163	0.000119124	8.81887e-05	6.20139e-05	3.7322e-05	7.66623e-05
164	0.000126793	9.49397e-05	6.44093e-05	3.7322e-05	8.08661e-05
165	0.000127202	9.51286e-05	6.45423e-05	3.7322e-05	8.10489e-05
166	0.000135689	0.000100463	6.70708e-05	3.9158e-05	8.55953e-05
167	0.000136507	0.000101124	6.7337e-05	3.9158e-05	8.60316e-05
168	0.000136405	0.000101455	6.747e-05	3.9158e-05	8.61219e-05
169	0.000136507	0.000101502	6.76031e-05	3.9158e-05	8.61925e-05
170	0.000136609	0.000101408	6.76031e-05	3.9158e-05	8.61945e-05
171	0.000136712	0.000101171	6.747e-05	3.9158e-05	8.61278e-05
172	0.000131599	9.49869e-05	6.401e-05	3.8546e-05	8.22855e-05
173	0.000132008	9.49397e-05	6.36108e-05	3.8546e-05	8.22762e-05
174	0.000130679	9.29097e-05	6.26793e-05	3.8546e-05	8.12034e-05
175	0.000129861	9.17766e-05	6.20139e-05	3.7934e-05	8.03964e-05
176	0.000116261	7.67638e-05	5.22993e-05	3.2428e-05	6.9438e-05
177	0.000121987	7.89827e-05	5.32308e-05	3.2428e-05	7.16571e-05
178	0.000121783	7.87938e-05	5.29646e-05	3.2428e-05	7.14922e-05
179	0.00010532	6.63303e-05	4.20523e-05	2.4474e-05	5.95441e-05
180	0.000116363	7.29398e-05	4.39154e-05	2.7533e-05	6.51879e-05
181	0.000118408	7.39312e-05	4.40485e-05	2.7533e-05	6.59803e-05
182	0.000117181	7.27037e-05	4.29839e-05	2.6921e-05	6.49475e-05
183	0.000119942	7.24677e-05	4.28508e-05	2.6309e-05	6.53925e-05
184	0.000118511	6.98711e-05	4.19193e-05	2.6309e-05	6.41526e-05
185	0.000115954	6.78883e-05	4.01893e-05	2.5086e-05	6.22794e-05
186	0.00011667	6.78411e-05	3.99231e-05	2.5086e-05	6.238e-05
187	0.000111455	6.32617e-05	3.59308e-05	2.4474e-05	5.87804e-05
188	0.000105525	5.7502e-05	2.99423e-05	2.2026e-05	5.37488e-05
189	9.22317e-05	4.67381e-05	2.32885e-05	1.8967e-05	4.53064e-05
190	9.45836e-05	4.89098e-05	2.38208e-05	1.8967e-05	4.65703e-05
191	9.42768e-05	4.85793e-05	2.32885e-05	1.8967e-05	4.62779e-05
192	9.36633e-05	4.77295e-05	2.26231e-05	1.7743e-05	4.54398e-05
193	5.27623e-05	2.64377e-05	1.09123e-05	7.3421e-06	2.43636e-05
194	0.000164217	9.76779e-05	9.04924e-05	0.00011931	0.000117924
195	0.000165138	9.92359e-05	9.10247e-05	0.00011992	0.00011883
196	0.000165854	9.95663e-05	9.12908e-05	0.00011992	0.000119158
197	0.000165956	0.000100133	9.12908e-05	0.00011992	0.000119325
198	0.000165854	0.000100322	9.12908e-05	0.00011992	0.000119347
199	0.000164729	9.98496e-05	9.11578e-05	0.00011992	0.000118914
200	0.000164831	9.92359e-05	9.14239e-05	0.00011992	0.000118853
201	0.000165854	9.73475e-05	9.38193e-05	0.00012482	0.000120459
202	0.000197245	0.000116656	0.000134408	0.00015663	0.000151235
203	0.000202358	0.000120858	0.000139864	0.00015786	0.000155234
204	0.000203073	0.000121141	0.000139864	0.00015786	0.000155484
205	0.00020338	0.000121566	0.000139864	0.00015786	0.000155667
206	0.000203278	0.00012133	0.000139598	0.00015786	0.000155515
207	0.000189576	0.000116892	0.000137069	0.0001548	0.000149584
208	0.00024469	0.000150506	0.000205737	0.00018906	0.000197498
209	0.000249189	0.000155038	0.000210129	0.00019273	0.000201772
210	0.000250212	0.000155558	0.000210927	0.00019273	0.000202357
211	0.000251234	0.000157824	0.000214387	0.00019273	0.000204044
212	0.00026238	0.000163772	0.000225965	0.00020191	0.000213506
213	0.000224444	0.000140356	0.000194026	0.00016826	0.000181771
214	0.000368927	0.000199274	0.00032351	0.00024657	0.000284571
215	0.000370972	0.000201304	0.000324708	0.00025208	0.000287266
216	0.00037179	0.000202815	0.000325639	0.00025208	0.000288081
217	0.000372506	0.000203806	0.000325373	0.0002533	0.000288747
218	0.000364837	0.000197905	0.000316856	0.00024229	0.000280472
219	0.000357066	0.000194128	0.0003114	0.00024107	0.000275915
220	0.000405431	0.000224862	0.000418793	0.0004234	0.000368121
221	0.000406658	0.000225901	0.000421987	0.00042768	0.000370556
222	0.000408192	0.000227317	0.000427044	0.00043686	0.000374852
223	0.000408294	0.0002276	0.000427177	0.00043686	0.000374982
224	0.000402159	0.000220613	0.000422253	0.00043686	0.00037047
225	0.00040267	0.000220897	0.000422253	0.00043808	0.000370975
226	0.000402568	0.000220849	0.000422253	0.00043808	0.000370938
227	0.000403488	0.000221558	0.00042385	0.0004393	0.00037205
228	0.000396637	0.000213485	0.000417196	0.00043257	0.000364973
229	0.000401443	0.000216695	0.000438356	0.00044848	0.000376244
230	0.000399603	0.000216223	0.000445941	0.00045093	0.000378174
231	0.000407783	0.000220519	0.000466967	0.00046928	0.000391138
232	0.000401955	0.000217828	0.000468298	0.00047234	0.000390106
233	0.000392752	0.00021509	0.000469363	0.00047969	0.000389222
234	0.000413611	0.000227128	0.000478013	0.00048519	0.000400986
235	0.000412896	0.0002276	0.00047788	0.00048519	0.000400892
236	0.000375982	0.000207867	0.000450333	0.00047173	0.000376478
237	0.000391627	0.000218867	0.000456454	0.00047112	0.000384517
238	0.000351646	0.000200455	0.000438755	0.00045154	0.000360599
239	0.00041402	0.000237137	0.000473621	0.00048397	0.000402187
240	0.000415145	0.000237703	0.00047402	0.00048397	0.000402709
241	0.000415759	0.000237326	0.000473222	0.0004803	0.000401651
242	0.000416372	0.000237373	0.000473621	0.0004803	0.000401916
243	0.000408294	0.000233171	0.000466435	0.0004803	0.000397049
244	0.00039674	0.000225948	0.000452196	0.00046867	0.000385889
245	0.000394899	0.000223493	0.000446207	0.000465	0.0003824
246	0.000398376	0.000224248	0.000448203	0.000465	0.000383957
247	0.000398478	0.000224012	0.000447804	0.00046378	0.000383518
248	0.000395308	0.000222832	0.00044461	0.00046378	0.000381632
249	0.00039449	0.000221369	0.000441683	0.00046194	0.000379871
250	0.00038631	0.000218442	0.000435162	0.00045582	0.000373934
251	0.000387946	0.000218158	0.000435827	0.0004546	0.000374133
252	0.000376085	0.000210369	0.000423052	0.00043074	0.000360061
253	0.000355532	0.000199699	0.000408946	0.00041238	0.00034414
254	0.000355532	0.000198472	0.000408147	0.00041299	0.000343786
255	0.000347045	0.000185017	0.000379669	0.00039464	0.000326592
256	0.000346738	0.000184828	0.000379802	0.00039464	0.000326502
257	0.000342546	0.000179682	0.000365163	0.00038485	0.00031806
258	0.000235896	0.00012185	0.000223969	0.00022883	0.000202636
259	0.000232318	0.000111841	0.000214387	0.00020864	0.000191796
260	0.000175568	7.99741e-05	0.000134541	0.00014072	0.000132702
261	0.000173829	8.00213e-05	0.000147849	0.00013155	0.000133311
262	9.2334e-05	3.57381e-05	6.60062e-05	4.9559e-05	6.09094e-05
263	0.000112682	4.57467e-05	0.00010207	7.5869e-05	8.40919e-05
264	0.000102764	4.19227e-05	9.64808e-05	7.1586e-05	7.81882e-05
265	0.000110126	4.56995e-05	0.000106861	7.2809e-05	8.38739e-05
266	0.000110228	4.55579e-05	0.000106728	7.2809e-05	8.38308e-05
267	8.2211e-05	3.46995e-05	9.27547e-05	6.0573e-05	6.75594e-05
268	0.000118408	5.2545e-05	0.00015916	7.5257e-05	0.000101343
269	0.000119533	5.35364e-05	0.000160092	7.5257e-05	0.000102104
270	0.000115341	5.24978e-05	0.00015743	6.9138e-05	9.86017e-05
271	0.000116159	5.25922e-05	0.000158229	6.9138e-05	9.90295e-05
272	0.000116057	5.26394e-05	0.000158095	6.9138e-05	9.89824e-05
273	0.000116159	5.24978e-05	0.000158095	6.9138e-05	9.89726e-05
274	0.000110637	5.0987e-05	0.000155966	5.9961e-05	9.43878e-05
275	0.000115239	5.2545e-05	0.000163685	5.9961e-05	9.78572e-05
276	0.000115341	5.26866e-05	0.000164217	5.9961e-05	9.80513e-05
277	0.000115341	5.26394e-05	0.00016435	5.9961e-05	9.80727e-05
278	0.000115239	5.2781e-05	0.00016435	5.9961e-05	9.80826e-05
279	0.000115239	5.2781e-05	0.00016435	5.9961e-05	9.80826e-05
280	0.000115239	5.26866e-05	0.000164483	5.9961e-05	9.80922e-05
281	0.000114625	5.23089e-05	0.000163818	5.9961e-05	9.76781e-05
282	0.000114727	5.23089e-05	0.000163818	6.0573e-05	9.78566e-05
283	0.000112682	5.15063e-05	0.000163019	5.9961e-05	9.67921e-05
284	0.000107467	5.0751e-05	0.000160624	5.9961e-05	9.47007e-05
285	0.000109512	5.13175e-05	0.000160491	5.9349e-05	9.51674e-05
286	0.000109512	5.12703e-05	0.000160624	5.9349e-05	9.51889e-05
287	0.00010348	5.01845e-05	0.000159027	5.9349e-05	9.301e-05
288	9.72421e-05	4.87209e-05	0.000156765	5.8737e-05	9.03662e-05
289	0.000101843	5.13175e-05	0.000158761	5.9349e-05	9.28177e-05
290	0.000101332	5.08454e-05	0.000158229	5.8125e-05	9.21328e-05
291	9.25385e-05	4.54634e-05	0.000149312	5.0783e-05	8.45243e-05
292	0.000121476	8.61586e-05	0.00023528	0.00017254	0.000153864
293	0.000122805	8.79054e-05	0.000238474	0.00018845	0.000159408
294	0.00012301	8.88968e-05	0.000240204	0.00019395	0.000161516
295	0.000104911	7.72831e-05	0.000216516	0.00018478	0.000145872
296	0.000161457	0.000119678	0.000312199	0.00035303	0.000236592
297	0.000161763	0.000119678	0.000311799	0.00035303	0.000236569
298	0.000168001	0.000124541	0.000317921	0.00035303	0.000240874
299	0.000166876	0.00012421	0.000314993	0.00035242	0.000239625
300	0.000162786	0.000126146	0.000322712	0.0003567	0.000242087
301	0.000263709	0.000215845	0.000627724	0.00068588	0.000448289
302	0.000294794	0.000244124	0.000740307	0.00083272	0.000527986
303	0.000303792	0.000251961	0.000771847	0.00086392	0.000547881
304	0.000305633	0.000254557	0.000776504	0.00086576	0.000550613
305	0.000306962	0.000256635	0.000778634	0.00086576	0.000551997
306	0.000303997	0.000255407	0.000775307	0.00086698	0.000550423
307	0.000315858	0.000262489	0.000799527	0.0008884	0.000566568
308	0.000326901	0.000270137	0.000822549	0.00091654	0.000584032
309	0.000333139	0.000273866	0.00083253	0.00093245	0.000592996
310	0.000367393	0.000303278	0.000921159	0.00102239	0.000653555
311	0.000371381	0.000306158	0.000925418	0.00102361	0.000656643
312	0.000371177	0.000306489	0.000925018	0.00102423	0.000656727
313	0.000368927	0.000305781	0.000924353	0.00102851	0.000656892
314	0.000388662	0.000317961	0.00095709	0.00108357	0.000686822
315	0.000389071	0.000318338	0.000958421	0.00108357	0.000687351
316	0.000388968	0.000318055	0.000958288	0.00108357	0.000687221
317	0.000391423	0.000319802	0.00096401	0.00109398	0.000692303
318	0.000389991	0.000319235	0.000959884	0.00109398	0.000690772
319	0.000390707	0.000319802	0.000960284	0.00109459	0.000691345
320	0.000391423	0.000319755	0.000960284	0.00109459	0.000691512
321	0.000391423	0.000319991	0.000960949	0.00109459	0.000691738
322	0.000391116	0.000319944	0.000960683	0.00109459	0.000691583
323	0.000346943	0.000300776	0.00088789	0.0010744	0.000652501
324	0.000355123	0.000305497	0.00090346	0.00108235	0.000661608
325	0.00035543	0.000305922	0.000904258	0.00108357	0.000662296
326	0.000352362	0.000304081	0.000899734	0.00108052	0.000659173
327	0.000351851	0.000303467	0.000898536	0.00108357	0.000659357
328	0.000351953	0.000303514	0.000898536	0.00108357	0.000659395
329	0.000347454	0.000299313	0.000890152	0.0010799	0.000654206
330	0.000347965	0.00029936	0.000890418	0.0010799	0.000654412
331	0.000335388	0.000290343	0.000853024	0.00105543	0.000633546
332	0.000335593	0.00029006	0.000853556	0.00105543	0.00063366
333	0.000312484	0.000264424	0.00076852	0.001023	0.000592107
334	0.000312586	0.00026466	0.000768786	0.00102361	0.000592412
335	0.000312177	0.000264424	0.000768254	0.00102361	0.000592117
336	0.000312381	0.000264188	0.000767322	0.00102361	0.000591876
337	0.000292647	0.00025654	0.000750022	0.00102055	0.000579941
338	0.000292647	0.000256635	0.00074909	0.00102361	0.000580496
339	0.000292544	0.000256446	0.000749357	0.00102361	0.00058049
340	0.000292033	0.000254935	0.000747627	0.00102361	0.000579552
341	0.00028416	0.000245021	0.000733121	0.00101077	0.000568267
342	0.000283342	0.000244266	0.000730992	0.00101199	0.000567647
343	0.000265243	0.000224721	0.000695594	0.00099241	0.000544492
344	0.000262584	0.000222124	0.00067643	0.000971	0.000533034
345	0.000262584	0.000222407	0.00067643	0.000971	0.000533104
346	0.000248269	0.000209188	0.00061628	0.00090063	0.000493593
347	0.000248065	0.000209141	0.000615747	0.00090125	0.00049355
348	0.000246122	0.000206356	0.000601508	0.00089452	0.000487125
349	0.00019428	0.000175905	0.000442614	0.00063326	0.000361514
350	0.000193871	0.000175433	0.000440352	0.00063142	0.00036027
351	0.000175874	0.000156691	0.000370353	0.00053292	0.000308958
352	0.000144585	0.000135918	0.000293834	0.00046317	0.000259376
353	0.000144687	0.00013521	0.000292503	0.00045949	0.000257974
354	0.000142029	0.000132472	0.000286116	0.00045399	0.000253651
355	2.34158e-05	2.38412e-05	5.66908e-05	7.5257e-05	4.48011e-05
356	2.73014e-05	2.7618e-05	6.02839e-05	7.3421e-05	4.71561e-05
357	2.69947e-05	2.68626e-05	5.80216e-05	6.9138e-05	4.52543e-05
358	1.59514e-05	1.3927e-05	2.82123e-05	3.1816e-05	2.24766e-05
359	3.04712e-05	3.04506e-05	4.23185e-05	4.8947e-05	3.80469e-05
360	3.09825e-05	3.10643e-05	4.35162e-05	4.8947e-05	3.86276e-05
361	3.09825e-05	3.11115e-05	4.33831e-05	4.8947e-05	3.86062e-05
362	2.97555e-05	3.07338e-05	4.17862e-05	4.8947e-05	3.78057e-05
363	3.21073e-05	3.21974e-05	4.36493e-05	4.8947e-05	3.92253e-05
364	3.21073e-05	3.22918e-05	4.37823e-05	4.8947e-05	3.92822e-05
365	3.22095e-05	3.22918e-05	4.41816e-05	4.8947e-05	3.94076e-05
366	3.22095e-05	3.22918e-05	4.41816e-05	4.8947e-05	3.94076e-05
367	3.2005e-05	3.21502e-05	4.36493e-05	4.7724e-05	3.88821e-05
368	3.2005e-05	3.21502e-05	4.36493e-05	4.7724e-05	3.88821e-05
369	3.18005e-05	3.20557e-05	4.35162e-05	4.7724e-05	3.87741e-05
370	3.19028e-05	3.19613e-05	4.325e-05	4.7724e-05	3.87095e-05
371	3.19028e-05	3.20085e-05	4.3117e-05	4.8336e-05	3.8841e-05
372	3.1187e-05	3.10171e-05	4.16531e-05	4.65e-05	3.75893e-05
373	2.89375e-05	2.66738e-05	3.19385e-05	3.304e-05	3.01473e-05
374	4.31506e-05	3.40858e-05	4.09877e-05	3.6099e-05	3.85807e-05
375	4.34573e-05	3.44162e-05	4.152e-05	3.6099e-05	3.88731e-05
376	4.47866e-05	3.5266e-05	4.35162e-05	3.6099e-05	3.99169e-05
377	4.49911e-05	3.30944e-05	4.28508e-05	3.1816e-05	3.8188e-05
378	9.03912e-05	7.08625e-05	0.000104332	3.9158e-05	7.6186e-05
379	9.55038e-05	7.56308e-05	0.00011072	3.977e-05	8.04061e-05
380	9.72421e-05	7.72359e-05	0.000112583	4.0382e-05	8.18607e-05
381	9.76511e-05	7.62445e-05	0.000111252	4.0382e-05	8.13824e-05
382	0.00011166	8.68668e-05	0.000127621	4.0382e-05	9.16323e-05
383	0.00011483	9.03131e-05	0.000130549	4.0382e-05	9.40182e-05
384	0.000116363	9.09269e-05	0.00013148	4.0382e-05	9.4788e-05
385	0.00011667	9.18711e-05	0.000132944	4.0382e-05	9.54667e-05
386	0.000116875	9.22015e-05	0.000132944	3.977e-05	9.54475e-05
387	0.000116977	9.20127e-05	0.000132678	3.7322e-05	9.47474e-05
388	0.00011667	9.21071e-05	0.00013148	3.7322e-05	9.43949e-05
389	0.00011667	9.16822e-05	0.000131214	3.7322e-05	9.42222e-05
390	0.000116772	9.20127e-05	0.000131214	3.7322e-05	9.43304e-05
391	0.00011575	9.11157e-05	0.000130282	3.7322e-05	9.36176e-05
392	0.000115648	8.93217e-05	0.000128819	3.4263e-05	9.20128e-05
393	0.000116977	8.96522e-05	0.000130415	3.1204e-05	9.20621e-05
394	0.000124544	9.65449e-05	0.00013667	3.1204e-05	9.72406e-05
395	0.000128429	0.000101408	0.000142925	3.1204e-05	0.000100991
396	0.000129758	0.000102777	0.000144522	3.1204e-05	0.000102065
397	0.000116977	8.9605e-05	0.000132145	2.6309e-05	9.12591e-05
398	0.000119533	9.15878e-05	0.000132944	2.6309e-05	9.25935e-05
399	0.000119533	9.15406e-05	0.000132944	2.6309e-05	9.25817e-05
400	0.000119533	9.14934e-05	0.000132811	2.6309e-05	9.25367e-05
401	0.000119329	9.12573e-05	0.000132545	2.6309e-05	9.236e-05
402	0.000116875	8.93689e-05	0.000130948	2.5697e-05	9.07222e-05
403	0.000107365	8.36565e-05	0.000127355	2.1415e-05	8.49477e-05
404	0.00010757	8.37981e-05	0.000127355	2.1415e-05	8.50342e-05
405	0.00010757	8.37981e-05	0.000127089	2.1415e-05	8.49677e-05
406	0.000107467	8.36565e-05	0.000127089	2.1415e-05	8.49067e-05
407	0.000106752	8.3326e-05	0.000126556	2.1415e-05	8.45121e-05
408	0.000106547	8.33732e-05	0.000126556	2.1415e-05	8.44728e-05
409	0.000106445	8.3326e-05	0.000126556	2.1415e-05	8.44354e-05
410	0.000106343	8.32788e-05	0.000126157	2.1415e-05	8.42982e-05
411	0.000104093	8.03046e-05	0.000120435	1.9579e-05	8.11028e-05
412	0.000103991	8.02574e-05	0.000120302	1.9579e-05	8.10322e-05
413	0.000102355	7.71415e-05	0.000116575	1.9579e-05	7.89127e-05
414	0.000101741	7.58668e-05	0.000115511	1.9579e-05	7.81745e-05
415	9.86737e-05	7.2326e-05	0.000107393	1.9579e-05	7.4493e-05
416	9.59128e-05	7.00127e-05	0.00010207	1.9579e-05	7.18937e-05
417	8.79371e-06	9.2532e-06	1.02469e-05	6.1184e-06	8.60307e-06
418	9.10047e-06	9.15878e-06	9.98078e-06	6.1184e-06	8.58962e-06
419	8.79371e-06	8.68668e-06	9.58154e-06	6.1184e-06	8.29509e-06
420	5.62389e-06	5.90128e-06	5.72231e-06	3.6711e-06	5.22963e-06
421	5.93064e-06	6.04291e-06	6.12154e-06	3.0592e-06	5.28858e-06
422	5.01037e-06	3.82403e-06	5.32308e-06	3.0592e-06	4.30417e-06
423	5.93064e-06	4.53218e-06	5.58923e-06	3.0592e-06	4.77782e-06
424	5.93064e-06	4.57939e-06	5.58923e-06	3.0592e-06	4.78962e-06
425	5.52163e-06	4.20171e-06	4.79077e-06	4.2829e-06	4.69925e-06
426	5.21488e-06	3.87124e-06	4.52462e-06	2.4474e-06	4.01453e-06
427	4.19235e-06	2.59656e-06	2.92769e-06	2.4474e-06	3.041e-06
428	7.87344e-06	4.48497e-06	5.19e-06	2.4474e-06	4.99895e-06
429	7.87344e-06	4.57939e-06	5.19e-06	2.4474e-06	5.02255e-06
430	8.89597e-06	4.95707e-06	6.12154e-06	2.4474e-06	5.60549e-06
431	8.89597e-06	5.33475e-06	6.12154e-06	2.4474e-06	5.69991e-06
432	7.97569e-06	4.95707e-06	4.6577e-06	1.2237e-06	4.70354e-06
433	1.12478e-05	7.31758e-06	7.05308e-06	3.6711e-06	7.32237e-06
434	1.14523e-05	7.31758e-06	7.05308e-06	3.6711e-06	7.3735e-06
435	2.15753e-05	1.47768e-05	1.34408e-05	7.954e-06	1.44367e-05
436	2.1882e-05	1.50128e-05	1.384e-05	7.954e-06	1.46722e-05
437	4.11055e-05	3.92789e-05	3.51323e-05	2.3862e-05	3.48447e-05
438	4.32528e-05	4.2442e-05	3.72616e-05	2.5697e-05	3.71634e-05
439	4.36618e-05	4.31501e-05	3.79269e-05	2.6309e-05	3.7762e-05
440	7.83254e-05	9.0738e-05	9.3287e-05	7.3421e-05	8.39429e-05
441	8.07795e-05	9.36178e-05	9.40854e-05	7.5257e-05	8.59349e-05
442	8.91642e-05	0.000104287	0.000102602	7.8316e-05	9.35925e-05
443	9.04935e-05	0.000105609	0.000103401	7.8928e-05	9.46078e-05
444	9.05957e-05	0.000105892	0.000103401	7.8928e-05	9.47042e-05
445	9.04935e-05	0.000106081	0.000103268	7.8928e-05	9.46926e-05
446	0.000103991	0.000123219	0.000114845	8.7494e-05	0.000107387
447	0.000104298	0.000124163	0.000114979	8.7494e-05	0.000107733
448	0.000104502	0.000124163	0.000114979	8.7494e-05	0.000107784
449	0.000103786	0.000124116	0.000114979	8.7494e-05	0.000107594
450	0.000129861	0.000152442	0.000145054	9.973e-05	0.000131772
451	0.000130576	0.000153055	0.000145054	9.973e-05	0.000132104
452	0.000130985	0.000153716	0.000145054	9.973e-05	0.000132372
453	0.000131088	0.000153811	0.000145054	9.973e-05	0.000132421
454	0.000131599	0.000154377	0.000145187	9.973e-05	0.000132723
455	0.000131497	0.000154425	0.000145187	9.973e-05	0.00013271
456	0.000126895	0.000149892	0.000141594	9.973e-05	0.000129528
457	0.000112989	0.000136249	0.000130282	9.7283e-05	0.000119201
458	0.000131497	0.000159004	0.000134807	0.00010034	0.000131413
459	0.000131599	0.000159429	0.000134807	9.973e-05	0.000131391
460	0.000131599	0.000159571	0.000133875	9.973e-05	0.000131194
461	0.00013119	0.00015891	0.000132811	9.973e-05	0.00013066
462	0.000107365	0.000138987	0.00011245	8.1987e-05	0.000110197
463	0.000116977	0.000148098	0.000113382	8.1987e-05	0.000115111
464	0.000117386	0.000148618	0.000113382	8.1987e-05	0.000115343
465	0.000116261	0.000147532	0.000113249	8.0763e-05	0.000114451
466	0.000113705	0.000140639	0.000105264	7.3421e-05	0.000108257
467	0.000110842	0.000133747	9.62147e-05	6.8526e-05	0.000102332
468	0.000111148	0.000134974	9.51501e-05	6.7915e-05	0.000102297
469	8.77326e-05	0.000103579	5.64247e-05	4.7112e-05	7.37121e-05
470	9.25385e-05	0.000109905	5.82877e-05	4.7724e-05	7.71138e-05
471	9.28453e-05	0.000110141	5.82877e-05	4.7724e-05	7.72495e-05
472	9.05957e-05	0.000107356	5.536e-05	4.7112e-05	7.51059e-05
473	6.58506e-05	7.22788e-05	2.22239e-05	1.2849e-05	4.33005e-05
474	7.60759e-05	8.84247e-05	3.10069e-05	2.0803e-05	5.40775e-05
475	7.61781e-05	8.89912e-05	3.08739e-05	2.0803e-05	5.42115e-05
476	7.50533e-05	8.56865e-05	2.91439e-05	1.7743e-05	5.19068e-05
477	7.31105e-05	8.42702e-05	2.80792e-05	1.4684e-05	5.00361e-05
478	7.32128e-05	8.43174e-05	2.83454e-05	1.4684e-05	5.014e-05
479	7.28038e-05	8.35621e-05	2.78131e-05	1.4684e-05	4.97158e-05
480	7.2906e-05	8.34677e-05	2.78131e-05	1.5908e-05	5.00237e-05
481	7.28038e-05	8.32788e-05	2.768e-05	1.5908e-05	4.99176e-05
482	6.79979e-05	7.9502e-05	2.70146e-05	1.8967e-05	4.83704e-05
483	6.65664e-05	7.83217e-05	2.62162e-05	1.8967e-05	4.75179e-05
484	6.48281e-05	7.6575e-05	2.595e-05	1.8355e-05	4.64271e-05
485	6.01245e-05	7.28926e-05	2.50185e-05	1.8355e-05	4.40977e-05
486	5.52163e-05	6.73218e-05	2.36877e-05	2.2026e-05	4.2063e-05
487	3.88559e-05	4.4472e-05	1.903e-05	2.1415e-05	3.09431e-05
488	4.61159e-05	5.30171e-05	2.74139e-05	3.2428e-05	3.97436e-05
489	4.62181e-05	5.20729e-05	2.71477e-05	3.1204e-05	3.91607e-05
490	4.74452e-05	5.30171e-05	2.82123e-05	3.1204e-05	3.99696e-05
491	4.72407e-05	5.24978e-05	2.80792e-05	3.1204e-05	3.97554e-05
492	4.70361e-05	5.19312e-05	2.78131e-05	3.1204e-05	3.94961e-05
493	2.54609e-05	2.70987e-05	2.08931e-05	2.7533e-05	2.52464e-05
494	2.85284e-05	2.86566e-05	2.12923e-05	2.7533e-05	2.65026e-05
495	2.83239e-05	2.82317e-05	2.10262e-05	2.7533e-05	2.62787e-05
496	2.76082e-05	2.69098e-05	1.98285e-05	2.7533e-05	2.54699e-05
497	3.64019e-05	3.72016e-05	2.83454e-05	3.7934e-05	3.49708e-05
498	3.65041e-05	3.75793e-05	2.84785e-05	3.7934e-05	3.51241e-05
499	3.67086e-05	3.79098e-05	2.87446e-05	4.2829e-05	3.6548e-05
500	3.67086e-05	3.80986e-05	2.87446e-05	4.2829e-05	3.65952e-05
501	3.67086e-05	3.81458e-05	2.87446e-05	4.2829e-05	3.6607e-05
502	3.66064e-05	3.81458e-05	2.87446e-05	4.2829e-05	3.65815e-05
503	3.60951e-05	3.78154e-05	2.86116e-05	4.2829e-05	3.63378e-05
504	3.54816e-05	3.74377e-05	2.84785e-05	4.2829e-05	3.60567e-05
505	3.54816e-05	3.72489e-05	2.84785e-05	4.2829e-05	3.60095e-05
506	3.01645e-05	3.06394e-05	2.51516e-05	4.2217e-05	3.20432e-05
507	3.10848e-05	3.20085e-05	2.51516e-05	4.2217e-05	3.26155e-05
508	3.10848e-05	3.19141e-05	2.51516e-05	4.2217e-05	3.25919e-05
509	3.0778e-05	3.16308e-05	2.44862e-05	4.2217e-05	3.22781e-05
510	2.00415e-05	2.13862e-05	1.41062e-05	3.304e-05	2.21434e-05
511	2.1473e-05	2.30858e-05	1.49046e-05	3.3651e-05	2.32787e-05
512	2.15753e-05	2.3133e-05	1.49046e-05	3.3651e-05	2.33161e-05
513	2.16775e-05	2.3133e-05	1.49046e-05	3.3651e-05	2.33416e-05
514	1.9019e-05	2.08669e-05	1.39731e-05	3.304e-05	2.17246e-05
515	2.12685e-05	2.4266e-05	1.69008e-05	3.304e-05	2.38687e-05
516	2.0655e-05	2.41244e-05	1.67677e-05	3.304e-05	2.36467e-05
517	2.01437e-05	2.38884e-05	1.62354e-05	3.304e-05	2.33268e-05
518	2.04505e-05	2.43605e-05	1.62354e-05	3.304e-05	2.35215e-05
519	2.04505e-05	2.44549e-05	1.62354e-05	3.304e-05	2.35451e-05
520	2.04505e-05	2.45493e-05	1.63685e-05	3.304e-05	2.3602e-05
521	2.04505e-05	2.45965e-05	1.61023e-05	3.304e-05	2.35472e-05
522	1.45199e-05	2.0206e-05	1.14446e-05	3.0592e-05	1.91907e-05
523	1.45199e-05	2.1103e-05	1.18439e-05	3.0592e-05	1.95147e-05
524	1.45199e-05	2.11974e-05	1.18439e-05	3.0592e-05	1.95383e-05
525	1.38041e-05	2.0442e-05	1.18439e-05	3.0592e-05	1.91705e-05
526	8.69146e-06	1.45407e-05	7.98462e-06	2.0803e-05	1.30049e-05
527	8.99822e-06	1.41159e-05	8.38385e-06	2.0803e-05	1.30752e-05
528	7.36218e-06	1.07639e-05	7.45231e-06	1.2849e-05	9.60678e-06
529	9.20272e-06	1.53905e-05	9.44847e-06	1.2849e-05	1.17226e-05
530	9.30498e-06	1.54849e-05	9.44847e-06	1.2849e-05	1.17718e-05
531	8.99822e-06	1.50601e-05	9.44847e-06	1.2849e-05	1.15889e-05
532	8.69146e-06	1.55322e-05	9.8477e-06	1.3461e-05	1.1883e-05
533	1.03275e-05	1.7751e-05	1.25092e-05	1.652e-05	1.42769e-05
534	1.04298e-05	1.76566e-05	1.23762e-05	1.652e-05	1.42456e-05
535	1.11455e-05	1.69485e-05	1.23762e-05	1.652e-05	1.42475e-05
536	1.12478e-05	1.72317e-05	1.27754e-05	1.7132e-05	1.45966e-05
537	1.12478e-05	1.82704e-05	1.384e-05	1.7743e-05	1.52754e-05
538	1.11455e-05	1.90729e-05	1.46385e-05	1.7743e-05	1.56501e-05
539	1.135e-05	1.80815e-05	1.47715e-05	1.8967e-05	1.57926e-05
540	1.06343e-05	1.67124e-05	1.45054e-05	1.8967e-05	1.52048e-05
541	1.70762e-05	2.93175e-05	2.86116e-05	2.5086e-05	2.50227e-05
542	1.70762e-05	2.96008e-05	2.86116e-05	2.5086e-05	2.50935e-05
543	1.70762e-05	2.97896e-05	2.86116e-05	2.5086e-05	2.51407e-05
544	1.67694e-05	2.88926e-05	2.80792e-05	2.5086e-05	2.47067e-05
545	3.06757e-05	4.73991e-05	6.64054e-05	3.6099e-05	4.51447e-05
546	3.10848e-05	4.806e-05	6.70708e-05	3.6099e-05	4.55786e-05
547	3.10848e-05	4.81072e-05	6.68047e-05	3.6099e-05	4.55238e-05
548	3.10848e-05	4.81544e-05	6.68047e-05	3.6099e-05	4.55356e-05
549	3.0778e-05	4.76823e-05	6.66716e-05	3.6099e-05	4.53077e-05
550	2.996e-05	4.63132e-05	6.60062e-05	3.6099e-05	4.45945e-05
551	3.04712e-05	4.75407e-05	6.69377e-05	3.6099e-05	4.52621e-05
552	3.04712e-05	4.74463e-05	6.69377e-05	3.6099e-05	4.52385e-05
553	3.04712e-05	4.70214e-05	6.66716e-05	3.6099e-05	4.50657e-05
554	3.0369e-05	4.70214e-05	6.66716e-05	3.6099e-05	4.50402e-05
555	3.02667e-05	4.69269e-05	6.66716e-05	3.6099e-05	4.4991e-05
556	3.01645e-05	4.68325e-05	6.65385e-05	3.6099e-05	4.49086e-05
557	3.01645e-05	4.67853e-05	6.65385e-05	3.6099e-05	4.48968e-05
558	2.9142e-05	4.51802e-05	6.5607e-05	3.6099e-05	4.4007e-05
559	2.85284e-05	4.44248e-05	6.48085e-05	3.6099e-05	4.34651e-05
560	2.50519e-05	3.53604e-05	5.56262e-05	2.8757e-05	3.61988e-05
561	2.53586e-05	3.54077e-05	5.56262e-05	2.8757e-05	3.62873e-05
562	2.53586e-05	3.53604e-05	5.56262e-05	2.8757e-05	3.62755e-05
563	2.54609e-05	3.53604e-05	5.56262e-05	2.8757e-05	3.6301e-05
564	2.27001e-05	3.16781e-05	4.93716e-05	2.5086e-05	3.22088e-05
565	8.3847e-06	1.57682e-05	1.65015e-05	1.1013e-05	1.29169e-05
566	8.69146e-06	1.56266e-05	1.65015e-05	1.0401e-05	1.28052e-05
567	7.97569e-06	1.37382e-05	1.45054e-05	9.7895e-06	1.15022e-05
568	2.76082e-06	4.34334e-06	2.66154e-06	4.8947e-06	3.66511e-06
569	3.06757e-06	4.24892e-06	3.06077e-06	4.8947e-06	3.818e-06
570	2.1473e-06	1.51073e-06	1.33077e-06	2.4474e-06	1.85904e-06
571	2.1473e-06	1.69957e-06	1.33077e-06	2.4474e-06	1.90625e-06
572	1.84054e-06	1.46352e-06	1.19769e-06	2.4474e-06	1.73728e-06
573	3.27208e-06	2.45493e-06	1.99616e-06	2.4474e-06	2.54263e-06
574	3.27208e-06	2.59656e-06	2.12923e-06	2.4474e-06	2.61131e-06
575	3.27208e-06	2.3133e-06	1.73e-06	2.4474e-06	2.44069e-06
576	3.98785e-06	3.6824e-06	2.39539e-06	2.4474e-06	3.12825e-06
577	3.98785e-06	3.63519e-06	2.26231e-06	2.4474e-06	3.08318e-06
578	6.0329e-06	7.60084e-06	5.05693e-06	2.4474e-06	5.28451e-06
579	6.2374e-06	8.35621e-06	5.58923e-06	2.4474e-06	5.65755e-06
580	6.13515e-06	8.82831e-06	5.85539e-06	2.4474e-06	5.81656e-06
581	2.07573e-05	2.86094e-05	1.69008e-05	4.2829e-06	1.76376e-05
582	2.07573e-05	2.86566e-05	1.69008e-05	4.2829e-06	1.76494e-05
583	2.07573e-05	2.85622e-05	1.70339e-05	4.2829e-06	1.7659e-05
584	2.86307e-05	3.94205e-05	2.768e-05	4.8947e-06	2.51565e-05
585	2.86307e-05	3.95622e-05	2.768e-05	4.8947e-06	2.51919e-05
586	2.86307e-05	3.96566e-05	2.768e-05	4.8947e-06	2.52155e-05
587	2.92442e-05	4.01759e-05	2.86116e-05	4.8947e-06	2.57316e-05
588	2.9551e-05	4.05064e-05	2.91439e-05	4.8947e-06	2.6024e-05
589	2.96532e-05	4.0648e-05	2.98093e-05	4.8947e-06	2.62513e-05
590	3.01645e-05	4.09785e-05	3.06077e-05	4.8947e-06	2.66614e-05
591	3.00622e-05	4.12617e-05	3.08739e-05	4.8947e-06	2.67731e-05
592	5.86929e-05	6.40643e-05	6.747e-05	9.1777e-06	4.98512e-05
593	6.1147e-05	6.68969e-05	7.30593e-05	9.7895e-06	5.27232e-05
594	6.61574e-05	7.12402e-05	7.9447e-05	1.0401e-05	5.68115e-05
595	7.86322e-05	7.79913e-05	8.67662e-05	1.2237e-05	6.39066e-05
596	8.0166e-05	7.94076e-05	8.76977e-05	1.2237e-05	6.4877e-05
597	8.81416e-05	8.43174e-05	9.16901e-05	1.2237e-05	6.90965e-05
598	8.83462e-05	8.309e-05	9.18231e-05	1.2237e-05	6.8874e-05
599	8.92664e-05	8.42702e-05	9.18231e-05	1.2237e-05	6.93992e-05
600	8.40515e-05	7.43561e-05	8.99601e-05	1.2237e-05	6.51511e-05
601	8.56876e-05	7.64333e-05	9.07585e-05	1.2237e-05	6.62791e-05
602	8.51763e-05	7.61501e-05	9.07585e-05	1.2237e-05	6.60804e-05
603	8.41538e-05	7.34591e-05	8.76977e-05	1.1625e-05	6.42339e-05
604	0.000101025	9.22487e-05	9.3287e-05	1.2849e-05	7.48525e-05
605	0.000101434	9.28625e-05	9.35531e-05	1.2849e-05	7.51747e-05
606	0.000101332	9.24376e-05	9.30208e-05	1.2849e-05	7.49098e-05
607	0.00010123	9.22487e-05	9.34201e-05	1.2849e-05	7.49369e-05
608	0.000101128	9.17294e-05	9.30208e-05	1.2849e-05	7.46817e-05
609	0.000101128	9.15878e-05	9.24885e-05	1.2849e-05	7.45132e-05
610	9.50948e-05	8.54505e-05	8.42377e-05	1.2237e-05	6.9255e-05
611	0.000104502	9.46565e-05	8.94278e-05	1.3461e-05	7.55117e-05
612	0.000104707	9.48925e-05	8.92947e-05	1.3461e-05	7.55886e-05
613	0.000105116	9.54118e-05	8.96939e-05	1.2849e-05	7.57675e-05
614	0.000104911	9.46565e-05	8.74316e-05	1.2237e-05	7.4809e-05
615	0.000105218	9.51286e-05	8.68993e-05	1.2237e-05	7.48706e-05
616	7.69961e-05	7.33647e-05	5.6957e-05	5.5066e-06	5.32061e-05
617	9.89804e-05	9.33346e-05	7.67854e-05	6.7303e-06	6.89577e-05
618	9.96962e-05	9.49397e-05	7.70516e-05	6.7303e-06	6.96044e-05
619	9.90827e-05	9.39011e-05	7.53216e-05	6.7303e-06	6.87589e-05
620	9.89804e-05	9.39483e-05	7.53216e-05	6.7303e-06	6.87451e-05
621	9.83669e-05	9.30985e-05	7.23939e-05	6.7303e-06	6.76474e-05
622	9.83669e-05	9.25792e-05	7.06639e-05	6.7303e-06	6.70851e-05
623	7.05542e-05	7.26093e-05	4.72423e-05	5.5066e-06	4.89781e-05
624	7.46443e-05	7.82273e-05	4.77746e-05	5.5066e-06	5.15382e-05
625	7.41331e-05	7.7708e-05	4.61777e-05	5.5066e-06	5.08813e-05
626	7.05542e-05	7.51587e-05	4.35162e-05	5.5066e-06	4.86839e-05
627	9.1107e-05	0.000102493	5.76223e-05	7.954e-06	6.47942e-05
628	9.12092e-05	0.000103532	5.76223e-05	7.954e-06	6.50794e-05
629	9.13115e-05	0.000103721	5.76223e-05	7.954e-06	6.51522e-05
630	9.12092e-05	0.00010339	5.76223e-05	7.954e-06	6.5044e-05
631	8.99822e-05	0.00010018	5.56262e-05	7.954e-06	6.34356e-05
632	9.00844e-05	0.00010018	5.56262e-05	7.954e-06	6.34612e-05
633	8.96754e-05	9.98496e-05	5.54931e-05	7.954e-06	6.3243e-05
634	8.20065e-05	9.4562e-05	5.28316e-05	6.7303e-06	5.90326e-05
635	8.23133e-05	9.50814e-05	5.22993e-05	6.7303e-06	5.9106e-05
636	8.0575e-05	9.17766e-05	5.15008e-05	4.2829e-06	5.70338e-05
637	6.47258e-05	7.54419e-05	4.68431e-05	4.2829e-06	4.78234e-05
638	8.80394e-05	9.57895e-05	5.72231e-05	1.1013e-05	6.30163e-05
639	8.87552e-05	9.69226e-05	5.76223e-05	1.1013e-05	6.35783e-05
640	9.2743e-05	0.000101738	5.8687e-05	1.2237e-05	6.63512e-05
641	8.60966e-05	9.33346e-05	5.41623e-05	1.2237e-05	6.14576e-05
642	9.50948e-05	9.88582e-05	5.21662e-05	2.0191e-05	6.65775e-05
643	9.64241e-05	0.000100086	5.21662e-05	2.0191e-05	6.72167e-05
644	9.65264e-05	9.93303e-05	5.20331e-05	2.0191e-05	6.70201e-05
645	9.62196e-05	9.9047e-05	5.19e-05	2.0191e-05	6.68394e-05
646	8.56876e-05	8.13904e-05	4.75085e-05	1.8967e-05	5.83884e-05
647	8.79371e-05	8.43646e-05	4.76416e-05	1.8967e-05	5.97276e-05
648	8.79371e-05	8.41758e-05	4.76416e-05	1.8967e-05	5.96804e-05
649	8.79371e-05	8.41758e-05	4.76416e-05	1.8967e-05	5.96804e-05
650	8.79371e-05	8.4223e-05	4.76416e-05	1.8967e-05	5.96922e-05
651	8.79371e-05	8.41758e-05	4.76416e-05	1.8967e-05	5.96804e-05
652	8.65056e-05	8.27595e-05	4.63108e-05	1.8967e-05	5.86358e-05
653	8.65056e-05	8.27595e-05	4.63108e-05	1.8967e-05	5.86358e-05
654	8.60966e-05	8.03518e-05	4.45808e-05	1.8967e-05	5.74991e-05
655	8.60966e-05	8.02101e-05	4.44477e-05	1.8967e-05	5.74304e-05
656	8.56876e-05	7.91715e-05	4.37823e-05	1.8967e-05	5.69021e-05
657	5.1024e-05	5.25922e-05	3.114e-05	1.8355e-05	3.82779e-05
658	5.15353e-05	5.22145e-05	3.08739e-05	1.8355e-05	3.82447e-05
659	5.15353e-05	5.13647e-05	3.07408e-05	1.8355e-05	3.7999e-05
660	5.07172e-05	4.97596e-05	2.96762e-05	1.7743e-05	3.69741e-05
661	4.90812e-05	4.72574e-05	2.86116e-05	1.7743e-05	3.56734e-05
662	9.30498e-06	1.02918e-05	4.92385e-06	7.3421e-06	7.96569e-06
663	1.93257e-05	1.55322e-05	6.25462e-06	8.5658e-06	1.24196e-05
664	2.11663e-05	1.73734e-05	6.3877e-06	8.5658e-06	1.33733e-05
665	2.24955e-05	1.77982e-05	6.52077e-06	8.5658e-06	1.38451e-05
666	2.24955e-05	1.79871e-05	6.52077e-06	8.5658e-06	1.38923e-05
667	2.27001e-05	1.79399e-05	6.52077e-06	8.5658e-06	1.39316e-05
668	2.15753e-05	1.67596e-05	5.58923e-06	8.5658e-06	1.31225e-05
669	2.56654e-05	1.89785e-05	5.98847e-06	8.5658e-06	1.47995e-05
670	2.56654e-05	1.91673e-05	5.98847e-06	8.5658e-06	1.48467e-05
671	2.56654e-05	1.92146e-05	5.98847e-06	8.5658e-06	1.48586e-05
672	2.58699e-05	1.92146e-05	5.98847e-06	8.5658e-06	1.49097e-05
673	2.57676e-05	1.92146e-05	5.98847e-06	8.5658e-06	1.48841e-05
674	2.57676e-05	1.92146e-05	5.98847e-06	8.5658e-06	1.48841e-05
675	2.57676e-05	1.88841e-05	5.32308e-06	8.5658e-06	1.46351e-05
676	2.57676e-05	1.87425e-05	5.19e-06	8.5658e-06	1.45665e-05
677	2.57676e-05	1.86008e-05	5.19e-06	8.5658e-06	1.45311e-05
678	2.56654e-05	1.85064e-05	5.19e-06	8.5658e-06	1.44819e-05
679	2.2291e-05	1.56266e-05	4.39154e-06	7.3421e-06	1.24128e-05
680	2.23933e-05	1.5721e-05	4.52462e-06	7.3421e-06	1.24953e-05
681	2.15753e-05	1.45407e-05	3.32693e-06	6.7303e-06	1.15433e-05
682	2.17798e-05	1.48712e-05	3.46e-06	6.7303e-06	1.17103e-05
683	2.1882e-05	1.47768e-05	3.46e-06	6.7303e-06	1.17123e-05
684	1.78942e-05	1.08583e-05	1.99616e-06	6.7303e-06	9.36974e-06
685	1.87122e-05	1.25107e-05	2.26231e-06	6.7303e-06	1.00539e-05
686	1.87122e-05	1.25579e-05	2.12923e-06	6.7303e-06	1.00324e-05
687	1.861e-05	1.22747e-05	2.12923e-06	6.7303e-06	9.93603e-06
688	1.34973e-05	8.73389e-06	1.73e-06	6.7303e-06	7.67287e-06
689	1.42131e-05	9.11157e-06	1.73e-06	6.7303e-06	7.94624e-06
690	1.45199e-05	9.15878e-06	1.73e-06	6.7303e-06	8.03473e-06
691	1.28838e-05	8.02574e-06	1.59692e-06	6.7303e-06	7.30919e-06
692	1.33951e-05	8.54505e-06	1.99616e-06	6.7303e-06	7.66664e-06
693	1.33951e-05	8.49784e-06	1.99616e-06	6.7303e-06	7.65484e-06
694	1.30883e-05	8.21458e-06	1.73e-06	6.7303e-06	7.44079e-06
695	1.24748e-05	8.02574e-06	1.73e-06	6.1184e-06	7.08724e-06
696	1.26793e-05	8.12016e-06	1.73e-06	5.5066e-06	7.00901e-06
697	1.26793e-05	8.12016e-06	1.73e-06	5.5066e-06	7.00901e-06
698	8.1802e-06	6.32617e-06	1.33077e-06	6.1184e-07	4.11225e-06
699	8.99822e-06	6.65664e-06	1.33077e-06	0	4.24641e-06
700	8.69146e-06	6.42059e-06	1.33077e-06	0	4.11071e-06
701	1.0941e-05	8.92273e-06	2.39539e-06	6.1184e-07	5.71774e-06
702	1.0941e-05	9.01715e-06	2.39539e-06	6.1184e-07	5.74135e-06
703	1.08388e-05	9.01715e-06	2.39539e-06	6.1184e-07	5.71579e-06
704	1.08388e-05	9.06436e-06	2.39539e-06	6.1184e-07	5.72759e-06
705	1.0532e-05	8.7811e-06	2.39539e-06	6.1184e-07	5.58008e-06
706	1.04298e-05	8.73389e-06	2.39539e-06	6.1184e-07	5.54272e-06
707	7.56668e-06	6.84548e-06	2.26231e-06	1.2237e-06	4.47454e-06
708	1.25771e-05	1.1e-05	2.79462e-06	4.2829e-06	7.66364e-06
709	1.26793e-05	1.1236e-05	2.79462e-06	4.2829e-06	7.74821e-06
710	1.1759e-05	1.02446e-05	2.52846e-06	4.2829e-06	7.20375e-06
711	1.89167e-05	1.65708e-05	3.19385e-06	4.2829e-06	1.07411e-05
712	1.9019e-05	1.67124e-05	3.32693e-06	4.2829e-06	1.08353e-05
713	1.87122e-05	1.65236e-05	3.32693e-06	4.2829e-06	1.07114e-05
714	1.85077e-05	1.63819e-05	3.19385e-06	4.2829e-06	1.05916e-05
715	2.00415e-05	1.79871e-05	3.32693e-06	4.2829e-06	1.14096e-05
716	2.00415e-05	1.80343e-05	3.32693e-06	4.2829e-06	1.14214e-05
717	1.99392e-05	1.77038e-05	3.19385e-06	4.2829e-06	1.128e-05
718	2.00415e-05	1.77982e-05	3.32693e-06	4.2829e-06	1.13624e-05
719	1.89167e-05	1.77038e-05	3.32693e-06	4.2829e-06	1.10576e-05
720	2.73014e-05	2.41716e-05	7.98462e-06	4.2829e-06	1.59351e-05
721	2.75059e-05	2.43133e-05	7.98462e-06	4.2829e-06	1.60217e-05
722	2.74037e-05	2.45021e-05	8.1177e-06	4.2829e-06	1.60766e-05
723	2.74037e-05	2.44549e-05	8.1177e-06	4.2829e-06	1.60648e-05
724	2.73014e-05	2.39828e-05	7.85154e-06	4.2829e-06	1.58547e-05
725	2.70969e-05	2.39828e-05	7.85154e-06	4.2829e-06	1.58035e-05
726	2.65856e-05	2.28497e-05	7.58539e-06	4.2829e-06	1.53259e-05
727	2.65856e-05	2.28025e-05	7.58539e-06	4.2829e-06	1.53141e-05
728	2.59721e-05	2.21416e-05	7.58539e-06	3.6711e-06	1.48425e-05
729	2.51541e-05	2.14334e-05	7.45231e-06	3.0592e-06	1.42748e-05
730	1.97347e-05	1.61931e-05	6.3877e-06	1.2237e-06	1.08848e-05
731	1.96325e-05	1.61459e-05	6.3877e-06	6.1184e-07	1.06945e-05
732	1.79964e-05	1.43991e-05	6.12154e-06	6.1184e-07	9.78223e-06
733	1.80987e-05	1.43991e-05	6.12154e-06	6.1184e-07	9.8078e-06
734	1.64627e-05	1.32189e-05	5.98847e-06	6.1184e-07	9.07045e-06
735	1.63604e-05	1.33605e-05	5.98847e-06	6.1184e-07	9.0803e-06
736	1.63604e-05	1.33133e-05	5.98847e-06	6.1184e-07	9.0685e-06
737	1.60536e-05	1.303e-05	5.85539e-06	6.1184e-07	8.88772e-06
738	1.60536e-05	1.303e-05	5.85539e-06	6.1184e-07	8.88772e-06
739	1.58491e-05	1.29828e-05	5.85539e-06	6.1184e-07	8.82479e-06
740	1.57469e-05	1.23691e-05	5.72231e-06	6.1184e-07	8.61253e-06
741	1.45199e-05	1.15193e-05	5.58923e-06	6.1184e-07	8.06006e-06
742	1.42131e-05	1.10944e-05	5.19e-06	6.1184e-07	7.77734e-06
743	1.30883e-05	1.02918e-05	5.19e-06	6.1184e-07	7.2955e-06
744	1.28838e-05	9.91414e-06	5.19e-06	6.1184e-07	7.14995e-06
745	1.26793e-05	9.96135e-06	5.19e-06	6.1184e-07	7.11063e-06
746	9.61173e-06	7.12874e-06	4.92385e-06	6.1184e-07	5.56904e-06
747	5.93064e-06	4.01287e-06	3.06077e-06	6.1184e-07	3.40403e-06
748	6.95317e-06	4.24892e-06	2.92769e-06	6.1184e-07	3.68541e-06
749	6.95317e-06	4.34334e-06	2.79462e-06	6.1184e-07	3.67574e-06
750	7.25993e-06	4.81544e-06	2.79462e-06	6.1184e-07	3.87046e-06
751	7.15767e-06	4.76823e-06	2.66154e-06	6.1184e-07	3.79982e-06
752	7.25993e-06	4.76823e-06	2.52846e-06	6.1184e-07	3.79212e-06
753	7.25993e-06	4.76823e-06	2.52846e-06	6.1184e-07	3.79212e-06
754	7.15767e-06	4.76823e-06	2.52846e-06	6.1184e-07	3.76655e-06
755	5.01037e-06	3.72961e-06	1.59692e-06	6.1184e-07	2.73719e-06
756	5.01037e-06	3.72961e-06	1.46385e-06	6.1184e-07	2.70392e-06
757	4.49911e-06	3.54077e-06	1.33077e-06	6.1184e-07	2.49562e-06
758	4.49911e-06	3.54077e-06	1.19769e-06	6.1184e-07	2.46235e-06
759	3.06757e-06	2.59656e-06	5.32308e-07	6.1184e-07	1.70207e-06
760	3.06757e-06	2.59656e-06	5.32308e-07	0	1.54911e-06
761	3.06757e-06	2.59656e-06	5.32308e-07	0	1.54911e-06
762	2.96532e-06	2.54935e-06	5.32308e-07	0	1.51175e-06
763	2.55631e-06	2.45493e-06	3.99231e-07	0	1.35262e-06
764	2.55631e-06	2.45493e-06	5.32308e-07	0	1.38589e-06
765	1.9428e-06	2.03004e-06	5.32308e-07	0	1.12629e-06
766	2.04505e-06	2.07725e-06	5.32308e-07	0	1.16365e-06
767	2.04505e-06	1.93562e-06	5.32308e-07	0	1.12824e-06
768	2.76082e-06	2.12446e-06	6.65385e-07	0	1.38767e-06
769	2.76082e-06	2.17167e-06	6.65385e-07	0	1.39947e-06
770	2.76082e-06	2.17167e-06	5.32308e-07	0	1.3662e-06
771	2.86307e-06	2.17167e-06	5.32308e-07	0	1.39176e-06
772	2.86307e-06	2.03004e-06	5.32308e-07	0	1.35635e-06
773	2.55631e-06	1.88841e-06	2.66154e-07	0	1.17772e-06
774	2.86307e-06	1.8412e-06	3.99231e-07	0	1.27587e-06
775	3.57884e-06	2.26609e-06	1.06462e-06	0	1.72739e-06
776	3.68109e-06	2.26609e-06	1.06462e-06	0	1.75295e-06
777	4.0901e-06	2.59656e-06	1.06462e-06	0	1.93782e-06
778	4.0901e-06	2.73819e-06	1.06462e-06	0	1.97323e-06
779	4.0901e-06	2.69098e-06	1.06462e-06	0	1.96142e-06
780	4.0901e-06	2.59656e-06	1.06462e-06	0	1.93782e-06
781	5.11262e-06	3.6824e-06	2.39539e-06	0	2.7976e-06
782	5.21488e-06	3.82403e-06	2.52846e-06	0	2.89184e-06
783	6.64641e-06	4.67381e-06	3.06077e-06	0	3.59525e-06
784	6.64641e-06	4.72102e-06	3.06077e-06	0	3.60705e-06
785	6.74866e-06	4.72102e-06	3.06077e-06	0	3.63261e-06
786	6.85092e-06	4.81544e-06	3.06077e-06	0	3.68178e-06
787	6.85092e-06	4.81544e-06	3.06077e-06	0	3.68178e-06
788	6.95317e-06	4.81544e-06	3.06077e-06	0	3.70735e-06
789	7.87344e-06	5.38196e-06	3.46e-06	1.2237e-06	4.48477e-06
790	7.77119e-06	5.33475e-06	3.46e-06	1.2237e-06	4.44741e-06
791	7.97569e-06	5.52359e-06	3.59308e-06	1.2237e-06	4.57901e-06
792	7.66894e-06	4.81544e-06	3.59308e-06	1.2237e-06	4.32529e-06
793	1.02252e-05	6.37338e-06	5.05693e-06	3.0592e-06	6.17869e-06
794	1.02252e-05	6.37338e-06	5.05693e-06	3.0592e-06	6.17869e-06
795	1.02252e-05	6.51501e-06	5.05693e-06	3.0592e-06	6.2141e-06
796	1.0123e-05	6.4678e-06	5.05693e-06	3.0592e-06	6.17673e-06
797	1.1759e-05	8.12016e-06	6.65385e-06	3.0592e-06	7.39807e-06
798	1.11455e-05	8.12016e-06	7.05308e-06	3.0592e-06	7.34449e-06
799	1.74852e-05	1.54377e-05	1.46385e-05	6.1184e-06	1.342e-05
800	1.75874e-05	1.58626e-05	1.51708e-05	6.1184e-06	1.36848e-05
801	5.24555e-05	5.37724e-05	5.68239e-05	2.7533e-05	4.76462e-05
802	5.94087e-05	6.4914e-05	7.35916e-05	3.2428e-05	5.75855e-05
803	6.0329e-05	6.68497e-05	7.70516e-05	3.3651e-05	5.94704e-05
804	6.45213e-05	7.12402e-05	8.2907e-05	3.7322e-05	6.39977e-05
805	6.46236e-05	7.16651e-05	8.33062e-05	3.9158e-05	6.46882e-05
806	6.47258e-05	7.17595e-05	8.33062e-05	3.9158e-05	6.47374e-05
807	6.54416e-05	7.21844e-05	8.38385e-05	3.9158e-05	6.51556e-05
808	6.70776e-05	7.31286e-05	8.49031e-05	4.0382e-05	6.63728e-05
809	6.72821e-05	7.32702e-05	8.49031e-05	4.0382e-05	6.64593e-05
810	6.87137e-05	7.43561e-05	8.53024e-05	4.0382e-05	6.71884e-05
811	6.89182e-05	7.45449e-05	8.53024e-05	4.0382e-05	6.72868e-05
812	6.89182e-05	7.46866e-05	8.53024e-05	4.0382e-05	6.73222e-05
813	6.95317e-05	7.5017e-05	8.53024e-05	4.0382e-05	6.75582e-05
814	8.28245e-05	8.42702e-05	8.94278e-05	4.0382e-05	7.4226e-05
815	8.36425e-05	8.47423e-05	8.94278e-05	4.0382e-05	7.45486e-05
816	8.47673e-05	8.58282e-05	8.94278e-05	4.0382e-05	7.51012e-05
817	8.48696e-05	8.59226e-05	8.94278e-05	4.0382e-05	7.51504e-05
818	8.58921e-05	8.64419e-05	8.94278e-05	4.0382e-05	7.55359e-05
819	8.58921e-05	8.64891e-05	8.94278e-05	4.0382e-05	7.55477e-05
820	8.59943e-05	8.64891e-05	8.94278e-05	4.0382e-05	7.55732e-05
821	8.59943e-05	8.64891e-05	8.94278e-05	4.0382e-05	7.55732e-05
822	7.74051e-05	7.73303e-05	8.41047e-05	3.8546e-05	6.93466e-05
823	7.27015e-05	7.2987e-05	8.06447e-05	3.8546e-05	6.62198e-05
824	5.07172e-05	4.73991e-05	4.37823e-05	2.2026e-05	4.09812e-05
825	5.63411e-05	5.45278e-05	4.4847e-05	2.2026e-05	4.44356e-05
826	5.62389e-05	5.40085e-05	4.43146e-05	2.2026e-05	4.41471e-05
827	5.62389e-05	5.40085e-05	4.43146e-05	2.2026e-05	4.41471e-05
828	5.60344e-05	5.3678e-05	4.35162e-05	2.2026e-05	4.38137e-05
829	5.27623e-05	4.75879e-05	3.806e-05	2.0191e-05	3.96503e-05
830	4.61159e-05	3.86652e-05	2.35546e-05	9.1777e-06	2.93783e-05
831	4.68316e-05	3.92317e-05	2.35546e-05	8.5658e-06	2.95459e-05
832	4.68316e-05	3.91373e-05	2.35546e-05	8.5658e-06	2.95223e-05
833	4.06965e-05	3.503e-05	1.87639e-05	7.954e-06	2.56111e-05
834	2.76082e-05	2.62017e-05	1.06462e-05	4.2829e-06	1.71847e-05
835	2.82217e-05	2.7618e-05	1.06462e-05	4.2829e-06	1.76922e-05
836	2.82217e-05	2.74763e-05	1.038e-05	4.2829e-06	1.75902e-05
837	2.80172e-05	2.72875e-05	9.8477e-06	3.0592e-06	1.70529e-05
838	2.79149e-05	2.72403e-05	9.44847e-06	3.0592e-06	1.69157e-05
839	2.42338e-05	2.47381e-05	8.91616e-06	3.0592e-06	1.52368e-05
840	1.51334e-05	1.60043e-05	3.32693e-06	6.1184e-07	8.7691e-06
841	2.1473e-05	1.9545e-05	4.12539e-06	0	1.12859e-05
842	2.19843e-05	2.0206e-05	4.39154e-06	0	1.16454e-05
843	2.13708e-05	2.06309e-05	4.92385e-06	0	1.17314e-05
844	2.13708e-05	1.99699e-05	4.92385e-06	0	1.15661e-05
845	1.63604e-05	1.54849e-05	4.12539e-06	0	8.99268e-06
846	2.00415e-05	2.00171e-05	5.72231e-06	6.1184e-07	1.15982e-05
847	1.83032e-05	1.86952e-05	4.79077e-06	6.1184e-07	1.06003e-05
848	2.75059e-05	3.11115e-05	7.71847e-06	1.2237e-06	1.68899e-05
849	2.89375e-05	3.30471e-05	7.85154e-06	1.2237e-06	1.7765e-05
850	2.88352e-05	3.35192e-05	7.71847e-06	1.2237e-06	1.78242e-05
851	2.9551e-05	3.46995e-05	7.85154e-06	1.2237e-06	1.83314e-05
852	2.87329e-05	3.39914e-05	7.71847e-06	1.2237e-06	1.79166e-05
853	3.34366e-05	4.02703e-05	9.58154e-06	1.2237e-06	2.1128e-05
854	3.34366e-05	4.03647e-05	9.58154e-06	1.2237e-06	2.11516e-05
855	3.35388e-05	4.04119e-05	9.58154e-06	1.2237e-06	2.1189e-05
856	3.35388e-05	4.03647e-05	9.58154e-06	1.2237e-06	2.11772e-05
857	3.35388e-05	4.03175e-05	9.58154e-06	1.2237e-06	2.11654e-05
858	3.36411e-05	4.03175e-05	9.71462e-06	1.2237e-06	2.12242e-05
859	3.36411e-05	4.02231e-05	9.58154e-06	1.2237e-06	2.11673e-05
860	3.36411e-05	3.9987e-05	9.58154e-06	1.2237e-06	2.11083e-05
861	3.2005e-05	3.81458e-05	9.31539e-06	1.2237e-06	2.01725e-05
862	3.26185e-05	3.8618e-05	9.44847e-06	1.2237e-06	2.04772e-05
863	3.26185e-05	3.84291e-05	9.44847e-06	1.2237e-06	2.043e-05
864	3.26185e-05	3.84291e-05	9.04924e-06	1.2237e-06	2.03301e-05
865	3.26185e-05	3.81931e-05	9.04924e-06	1.2237e-06	2.02711e-05
866	3.26185e-05	3.79098e-05	8.91616e-06	1.2237e-06	2.0167e-05
867	1.64627e-05	2.36523e-05	4.52462e-06	6.1184e-07	1.13129e-05
868	1.66672e-05	2.36051e-05	4.6577e-06	0	1.12325e-05
869	1.66672e-05	2.36051e-05	4.52462e-06	6.1184e-07	1.13522e-05
870	1.66672e-05	2.33218e-05	4.52462e-06	6.1184e-07	1.12814e-05
871	1.24748e-05	1.83176e-05	4.39154e-06	6.1184e-07	8.94894e-06
872	1.24748e-05	1.81287e-05	4.25846e-06	6.1184e-07	8.86846e-06
873	1.18613e-05	1.71845e-05	4.25846e-06	6.1184e-07	8.47903e-06
874	8.07795e-06	9.11157e-06	2.12923e-06	6.1184e-07	4.98265e-06
875	7.77119e-06	8.63947e-06	2.12923e-06	6.1184e-07	4.78793e-06
876	5.62389e-06	6.42059e-06	2.12923e-06	6.1184e-07	3.69639e-06
877	6.2374e-06	6.65664e-06	2.52846e-06	6.1184e-07	4.00859e-06
878	6.2374e-06	6.37338e-06	2.52846e-06	6.1184e-07	3.93777e-06
879	5.72614e-06	5.5708e-06	2.26231e-06	6.1184e-07	3.54277e-06
880	6.74866e-06	6.4678e-06	2.52846e-06	6.1184e-07	4.08919e-06
881	6.74866e-06	6.51501e-06	2.52846e-06	6.1184e-07	4.10099e-06
882	6.74866e-06	6.56222e-06	2.52846e-06	6.1184e-07	4.1128e-06
883	6.2374e-06	6.18454e-06	2.52846e-06	6.1184e-07	3.89056e-06
884	5.11262e-06	4.95707e-06	2.12923e-06	6.1184e-07	3.20269e-06
885	5.11262e-06	5.00428e-06	2.26231e-06	6.1184e-07	3.24776e-06
886	3.57884e-06	2.87982e-06	1.33077e-06	6.1184e-07	2.10032e-06
887	3.98785e-06	3.6824e-06	1.33077e-06	6.1184e-07	2.40321e-06
888	3.98785e-06	3.54077e-06	1.06462e-06	6.1184e-07	2.30127e-06
889	3.57884e-06	3.30471e-06	1.19769e-06	6.1184e-07	2.17327e-06
890	3.98785e-06	4.1545e-06	1.33077e-06	6.1184e-07	2.52124e-06
891	4.0901e-06	4.39055e-06	1.33077e-06	6.1184e-07	2.60582e-06
892	4.0901e-06	4.48497e-06	1.33077e-06	6.1184e-07	2.62942e-06
893	3.88559e-06	4.1545e-06	1.33077e-06	6.1184e-07	2.49568e-06
894	6.0329e-06	8.54505e-06	4.25846e-06	0	4.7091e-06
895	6.13515e-06	8.59226e-06	4.25846e-06	0	4.74647e-06
896	6.13515e-06	8.68668e-06	4.25846e-06	0	4.77007e-06
897	6.13515e-06	8.63947e-06	4.25846e-06	0	4.75827e-06
898	6.0329e-06	8.49784e-06	4.25846e-06	0	4.6973e-06
899	5.72614e-06	8.54505e-06	4.39154e-06	0	4.66568e-06
900	5.72614e-06	8.45063e-06	4.6577e-06	0	4.70862e-06
901	4.90812e-06	7.74247e-06	4.25846e-06	0	4.22726e-06
902	1.72807e-05	2.32746e-05	1.91631e-05	1.5908e-05	1.89066e-05
903	1.74852e-05	2.4266e-05	1.96954e-05	1.8355e-05	1.99505e-05
904	1.78942e-05	2.45493e-05	1.98285e-05	1.8355e-05	2.01568e-05
905	1.79964e-05	2.50686e-05	1.98285e-05	1.8355e-05	2.03122e-05
906	1.96325e-05	2.73819e-05	2.00946e-05	1.9579e-05	2.1672e-05
907	1.95302e-05	2.73819e-05	2.00946e-05	1.9579e-05	2.16464e-05
908	2.76082e-05	4.36222e-05	2.86116e-05	3.0592e-05	3.26085e-05
909	2.78127e-05	4.38583e-05	2.86116e-05	3.0592e-05	3.27187e-05
910	3.09825e-05	4.86737e-05	2.941e-05	3.3651e-05	3.56794e-05
911	3.13915e-05	4.95707e-05	2.941e-05	3.4875e-05	3.63118e-05
912	3.16983e-05	4.97596e-05	2.941e-05	3.4875e-05	3.64357e-05
913	3.06757e-05	4.81072e-05	2.82123e-05	3.4875e-05	3.54676e-05
914	5.66479e-05	7.5678e-05	3.75277e-05	3.9158e-05	5.22529e-05
915	5.92042e-05	8.12016e-05	3.88585e-05	3.977e-05	5.47585e-05
916	5.992e-05	8.24762e-05	3.89916e-05	3.977e-05	5.52894e-05
917	6.12492e-05	8.41758e-05	3.92577e-05	3.977e-05	5.61131e-05
918	6.1556e-05	8.44119e-05	3.93908e-05	3.977e-05	5.62821e-05
919	6.05335e-05	8.3326e-05	3.84593e-05	3.977e-05	5.55221e-05
920	6.84069e-05	9.94719e-05	3.95239e-05	3.977e-05	6.17931e-05
921	6.96339e-05	0.000101596	3.95239e-05	3.977e-05	6.2631e-05
922	6.78957e-05	9.96135e-05	3.64631e-05	3.9158e-05	6.07826e-05
923	8.46651e-05	0.000121094	3.85923e-05	3.977e-05	7.10304e-05
924	8.49718e-05	0.000121661	3.87254e-05	3.977e-05	7.12819e-05
925	8.53808e-05	0.000122227	3.87254e-05	3.977e-05	7.15258e-05
926	8.56876e-05	0.000122416	3.87254e-05	3.977e-05	7.16497e-05
927	8.56876e-05	0.000121613	3.83262e-05	3.977e-05	7.13493e-05
928	8.56876e-05	0.000121661	3.83262e-05	3.977e-05	7.13611e-05
929	8.56876e-05	0.000121708	3.83262e-05	3.977e-05	7.13729e-05
930	8.53808e-05	0.000120717	3.79269e-05	3.977e-05	7.09485e-05
931	8.52786e-05	0.000120056	3.76608e-05	3.9158e-05	7.05382e-05
932	8.52786e-05	0.000119914	3.76608e-05	3.9158e-05	7.05028e-05
933	8.51763e-05	0.00011897	3.76608e-05	3.9158e-05	7.02412e-05
934	8.04727e-05	0.000113257	3.35354e-05	3.304e-05	6.50762e-05
935	7.82232e-05	0.00011033	3.23377e-05	3.0592e-05	6.28708e-05
936	7.41331e-05	0.000105704	3.03416e-05	2.7533e-05	5.94278e-05
937	6.21695e-05	8.81415e-05	2.14254e-05	1.5296e-05	4.67581e-05
938	3.82424e-05	5.56136e-05	6.78693e-06	3.6711e-06	2.60785e-05
939	4.2946e-05	6.79827e-05	9.71462e-06	5.5066e-06	3.15375e-05
940	4.2946e-05	6.79355e-05	9.71462e-06	5.5066e-06	3.15257e-05
941	4.20258e-05	6.71329e-05	9.71462e-06	5.5066e-06	3.1095e-05
942	4.0901e-05	6.60943e-05	9.31539e-06	5.5066e-06	3.04543e-05
943	2.96532e-05	5.38668e-05	6.65385e-06	4.2829e-06	2.36142e-05
944	3.27208e-05	5.96737e-05	1.02469e-05	6.1184e-06	2.719e-05
945	3.26185e-05	5.88239e-05	1.02469e-05	6.1184e-06	2.6952e-05
946	3.22095e-05	5.70299e-05	9.98078e-06	4.8947e-06	2.60287e-05
947	3.23118e-05	5.72188e-05	1.01139e-05	4.8947e-06	2.61348e-05
948	3.1596e-05	5.64634e-05	1.01139e-05	4.8947e-06	2.5767e-05
949	1.74852e-05	3.68712e-05	7.85154e-06	4.8947e-06	1.67757e-05
950	1.76897e-05	3.89484e-05	9.44847e-06	4.8947e-06	1.77453e-05
951	1.77919e-05	3.90428e-05	9.58154e-06	4.8947e-06	1.78278e-05
952	1.37018e-05	3.29055e-05	9.58154e-06	4.8947e-06	1.52709e-05
953	1.40086e-05	3.39441e-05	9.98078e-06	4.8947e-06	1.57071e-05
954	1.40086e-05	3.38497e-05	9.98078e-06	4.8947e-06	1.56835e-05
955	1.38041e-05	3.37081e-05	9.98078e-06	4.8947e-06	1.55969e-05
956	1.34973e-05	3.27167e-05	9.98078e-06	4.8947e-06	1.52724e-05
957	1.37018e-05	3.37081e-05	1.01139e-05	4.8947e-06	1.56046e-05
958	1.34973e-05	3.29527e-05	1.01139e-05	4.8947e-06	1.53647e-05
959	1.34973e-05	3.29055e-05	1.02469e-05	4.8947e-06	1.53861e-05
960	1.32928e-05	3.17725e-05	9.8477e-06	4.8947e-06	1.49519e-05
961	1.23726e-05	3.02617e-05	9.71462e-06	4.8947e-06	1.43109e-05
962	1.14523e-05	2.77124e-05	9.04924e-06	2.4474e-06	1.26653e-05
963	6.74866e-06	1.71845e-05	5.58923e-06	1.2237e-06	7.68653e-06
964	4.19235e-06	9.91414e-06	3.32693e-06	6.1184e-07	4.51132e-06
965	4.90812e-06	1.20858e-05	3.99231e-06	0	5.24656e-06
966	4.90812e-06	1.20386e-05	4.12539e-06	0	5.26803e-06
967	4.0901e-06	1.05279e-05	3.99231e-06	0	4.65257e-06
968	6.44191e-06	1.75622e-05	5.85539e-06	0	7.46487e-06
969	6.33965e-06	1.89785e-05	6.65385e-06	0	7.993e-06
970	4.90812e-06	1.71845e-05	6.12154e-06	0	7.05354e-06
971	7.05542e-06	2.34635e-05	7.58539e-06	0	9.52607e-06
972	7.15767e-06	2.40772e-05	7.31924e-06	0	9.63853e-06
973	7.25993e-06	2.40772e-05	7.05308e-06	0	9.59755e-06
974	9.81624e-06	3.11115e-05	8.91616e-06	0	1.2461e-05
975	9.91849e-06	3.15364e-05	8.91616e-06	0	1.25928e-05
976	1.02252e-05	3.20557e-05	8.91616e-06	0	1.27993e-05
977	1.02252e-05	3.21029e-05	8.91616e-06	0	1.28111e-05
978	1.02252e-05	3.21974e-05	8.91616e-06	0	1.28347e-05
979	1.02252e-05	3.22446e-05	8.91616e-06	0	1.28465e-05
980	1.03275e-05	3.22918e-05	8.91616e-06	0	1.28839e-05
981	1.03275e-05	3.22918e-05	8.91616e-06	0	1.28839e-05
982	1.03275e-05	3.22446e-05	8.78308e-06	0	1.28388e-05
983	1.02252e-05	3.21502e-05	8.78308e-06	0	1.27896e-05
984	1.03275e-05	3.21974e-05	8.78308e-06	0	1.2827e-05
985	1.0123e-05	3.19141e-05	8.78308e-06	0	1.2705e-05
986	1.00207e-05	3.18669e-05	8.65001e-06	0	1.26344e-05
987	9.71399e-06	3.13004e-05	8.65001e-06	0	1.24161e-05
988	8.28245e-06	2.83261e-05	8.1177e-06	0	1.11816e-05
989	8.28245e-06	2.82789e-05	8.1177e-06	0	1.11698e-05
990	8.07795e-06	2.5163e-05	6.12154e-06	0	9.84063e-06
991	7.77119e-06	2.22832e-05	5.58923e-06	0	8.91091e-06
992	7.77119e-06	2.22832e-05	5.58923e-06	0	8.91091e-06
993	7.56668e-06	2.17639e-05	5.45616e-06	0	8.69669e-06
994	7.25993e-06	2.12918e-05	5.45616e-06	0	8.50197e-06
995	5.21488e-06	1.73734e-05	4.12539e-06	0	6.67841e-06
996	4.39686e-06	1.44463e-05	3.32693e-06	0	5.54253e-06
997	2.24955e-06	4.24892e-06	7.98462e-07	0	1.82423e-06
998	2.76082e-06	4.39055e-06	1.19769e-06	0	2.08726e-06
999	2.65856e-06	4.29613e-06	1.19769e-06	0	2.0381e-06
1000	2.65856e-06	4.06008e-06	9.31539e-07	0	1.91255e-06
1001	1.73829e-06	1.32189e-06	5.32308e-07	0	8.98122e-07
1002	2.1473e-06	1.3691e-06	6.65385e-07	0	1.04545e-06
1003	2.1473e-06	1.22747e-06	6.65385e-07	0	1.01004e-06
1004	2.04505e-06	1.03862e-06	6.65385e-07	0	9.37265e-07
1005	2.65856e-06	1.22747e-06	7.98462e-07	0	1.17112e-06
1006	2.76082e-06	1.18026e-06	7.98462e-07	0	1.18488e-06
1007	2.86307e-06	1.22747e-06	1.19769e-06	0	1.32206e-06
1008	2.86307e-06	1.18026e-06	1.19769e-06	0	1.31025e-06
1009	2.45406e-06	7.55363e-07	1.19769e-06	0	1.10178e-06
1010	2.76082e-06	1.22747e-06	1.46385e-06	0	1.36303e-06
1011	2.76082e-06	1.22747e-06	1.33077e-06	0	1.32976e-06
1012	2.76082e-06	1.22747e-06	1.33077e-06	0	1.32976e-06
1013	2.55631e-06	1.08583e-06	1.33077e-06	0	1.24323e-06
1014	3.16983e-06	1.41631e-06	1.59692e-06	0	1.54576e-06
1015	3.27208e-06	1.3691e-06	1.59692e-06	0	1.55952e-06
1016	6.64641e-06	3.91845e-06	2.52846e-06	0	3.27333e-06
1017	6.64641e-06	4.10729e-06	2.66154e-06	0	3.35381e-06
1018	6.64641e-06	4.10729e-06	2.66154e-06	0	3.35381e-06
1019	6.74866e-06	4.29613e-06	2.79462e-06	0	3.45985e-06
1020	6.74866e-06	4.29613e-06	2.79462e-06	0	3.45985e-06
1021	6.74866e-06	4.39055e-06	2.79462e-06	0	3.48346e-06
1022	6.74866e-06	4.39055e-06	2.79462e-06	0	3.48346e-06
1023	6.74866e-06	4.39055e-06	2.79462e-06	0	3.48346e-06
1024	6.74866e-06	4.39055e-06	2.79462e-06	0	3.48346e-06
1025	6.74866e-06	4.39055e-06	2.79462e-06	0	3.48346e-06
1026	5.82839e-06	4.29613e-06	2.52846e-06	0	3.16325e-06
1027	5.82839e-06	4.29613e-06	2.52846e-06	0	3.16325e-06
1028	5.62389e-06	4.29613e-06	2.39539e-06	0	3.07885e-06
1029	5.41938e-06	4.06008e-06	1.99616e-06	0	2.8689e-06
1030	6.13515e-06	5.14591e-06	2.66154e-06	1.8355e-06	3.94453e-06
1031	6.13515e-06	5.14591e-06	2.66154e-06	1.8355e-06	3.94453e-06
1032	6.13515e-06	5.14591e-06	2.66154e-06	1.8355e-06	3.94453e-06
1033	6.0329e-06	4.86265e-06	2.66154e-06	1.8355e-06	3.84815e-06
1034	6.74866e-06	5.14591e-06	3.06077e-06	3.0592e-06	4.50364e-06
1035	6.74866e-06	5.14591e-06	3.06077e-06	3.0592e-06	4.50364e-06
1036	6.64641e-06	4.86265e-06	3.06077e-06	3.0592e-06	4.40726e-06
1037	5.52163e-06	4.34334e-06	2.52846e-06	3.0592e-06	3.86316e-06
1038	5.93064e-06	4.86265e-06	2.92769e-06	3.0592e-06	4.19505e-06
1039	5.62389e-06	4.48497e-06	2.52846e-06	3.0592e-06	3.92413e-06
1040	6.13515e-06	4.6266e-06	2.79462e-06	8.5658e-06	5.53054e-06
1041	4.49911e-06	3.35192e-06	2.39539e-06	8.5658e-06	4.70306e-06
1042	8.48696e-06	9.77251e-06	7.31924e-06	1.4072e-05	9.91278e-06
1043	9.10047e-06	1.02918e-05	7.71847e-06	1.4072e-05	1.02958e-05
1044	9.40723e-06	1.05279e-05	7.71847e-06	1.5296e-05	1.07374e-05
1045	9.10047e-06	1.04335e-05	7.85154e-06	1.5296e-05	1.06704e-05
1046	1.06343e-05	1.17553e-05	9.04924e-06	1.5296e-05	1.16837e-05
1047	1.135e-05	1.24635e-05	9.58154e-06	1.652e-05	1.24787e-05
1048	1.135e-05	1.24635e-05	9.71462e-06	1.652e-05	1.2512e-05
1049	3.84469e-05	5.11287e-05	5.38962e-05	7.7704e-05	5.5294e-05
1050	3.9265e-05	5.35364e-05	5.56262e-05	7.8316e-05	5.66859e-05
1051	3.94695e-05	5.37724e-05	5.58923e-05	7.954e-05	5.71685e-05
1052	3.94695e-05	5.41501e-05	5.58923e-05	7.954e-05	5.72629e-05
1053	3.94695e-05	5.41973e-05	5.58923e-05	7.954e-05	5.72747e-05
1054	3.95717e-05	5.46222e-05	5.61585e-05	7.954e-05	5.7473e-05
1055	3.97762e-05	5.46694e-05	5.61585e-05	7.954e-05	5.75359e-05
1056	3.98785e-05	5.47638e-05	5.61585e-05	7.954e-05	5.75851e-05
1057	3.98785e-05	5.4575e-05	5.60254e-05	7.954e-05	5.75046e-05
1058	3.97762e-05	5.47166e-05	5.61585e-05	7.954e-05	5.75477e-05
1059	4.2946e-05	5.76909e-05	5.77554e-05	7.954e-05	5.9483e-05
1060	4.36618e-05	5.79269e-05	5.77554e-05	7.954e-05	5.9721e-05
1061	4.40708e-05	5.85879e-05	5.80216e-05	8.1375e-05	6.05139e-05
1062	8.33358e-05	0.000112124	0.000120568	0.00014501	0.000115259
1063	9.24363e-05	0.000123691	0.000129883	0.0001548	0.000125202
1064	9.36633e-05	0.00012506	0.00013148	0.0001548	0.00012625
1065	0.000138245	0.000174158	0.000210129	0.00024902	0.000192888
1066	0.000140699	0.000180532	0.000215585	0.00025269	0.000197377
1067	0.000141108	0.000180768	0.000215718	0.0002533	0.000197724
1068	0.000141722	0.000181334	0.000216117	0.0002533	0.000198119
1069	0.00014162	0.00018124	0.000215585	0.0002533	0.000197937
1070	0.000141722	0.000181382	0.000215585	0.0002533	0.000197998
1071	0.000141722	0.00018124	0.000215319	0.0002533	0.000197896
1072	0.000140393	0.000179729	0.000213855	0.0002533	0.00019682
1073	0.00014029	0.000178879	0.000212258	0.00025269	0.00019603
1074	0.000140393	0.000178549	0.000211859	0.00025269	0.000195873
1075	0.000135689	0.000171515	0.000205604	0.00024963	0.00019061
1076	0.000146732	0.000180673	0.000209596	0.00024963	0.000196659
1077	0.000146732	0.00018039	0.000208931	0.00024963	0.000196421
1078	0.000147346	0.00018039	0.000208931	0.00024963	0.000196575
1079	0.000147755	0.000180437	0.00020933	0.00024902	0.000196636
1080	0.000145096	0.000176425	0.000204939	0.00023862	0.00019127
1081	0.000146323	0.000175244	0.000203475	0.00023556	0.000190151
1082	0.000146323	0.000174725	0.000203209	0.00023556	0.000189954
1083	0.000145812	0.000172506	0.000202809	0.00023434	0.000188866
1084	0.00014479	0.000170901	0.000199083	0.00023372	0.000187124
1085	0.000106138	0.000121283	0.00014186	0.00017743	0.000136679
1086	0.000112171	0.00012539	0.00014532	0.00017743	0.000140079
1087	0.000111864	0.00012421	0.000144921	0.00017682	0.000139454
1088	0.000111864	0.000124352	0.000144921	0.00017682	0.00013949
1089	0.00010941	0.000118498	0.000140396	0.00016765	0.000133987
1090	9.97984e-05	0.00010188	0.000111785	0.00013766	0.000112782
1091	9.91849e-05	9.73947e-05	0.00010726	0.00013032	0.000108541
1092	6.95317e-05	6.19398e-05	5.25654e-05	6.2408e-05	6.16112e-05
1093	7.22925e-05	6.48668e-05	5.3497e-05	6.302e-05	6.3419e-05
1094	7.127e-05	6.31201e-05	5.30977e-05	6.2408e-05	6.24739e-05
1095	6.3601e-05	5.69355e-05	4.20523e-05	5.2007e-05	5.36489e-05
1096	4.54001e-05	3.84763e-05	2.44862e-05	2.9368e-05	3.44328e-05
1097	5.0615e-05	4.39055e-05	2.48854e-05	2.9368e-05	3.71936e-05
1098	5.1024e-05	4.38583e-05	2.47523e-05	2.9368e-05	3.72508e-05
1099	4.23325e-05	3.43218e-05	1.61023e-05	1.2237e-05	2.62484e-05
1100	4.1719e-05	3.35665e-05	1.58362e-05	1.2237e-05	2.58396e-05
1101	3.42546e-05	2.89399e-05	1.18439e-05	1.0401e-05	2.13599e-05
1102	3.60951e-05	3.05922e-05	1.29085e-05	1.0401e-05	2.24993e-05
1103	3.54816e-05	3.01201e-05	1.23762e-05	1.0401e-05	2.20948e-05
1104	3.66064e-05	3.05922e-05	1.22431e-05	1.0401e-05	2.24608e-05
1105	3.35388e-05	2.82789e-05	1.01139e-05	1.0401e-05	2.05832e-05
1106	4.131e-05	3.30944e-05	1.17108e-05	1.0401e-05	2.41291e-05
1107	4.131e-05	3.33304e-05	1.14446e-05	1.0401e-05	2.41216e-05
1108	4.12078e-05	3.32832e-05	1.14446e-05	1.0401e-05	2.40842e-05
1109	4.12078e-05	3.33304e-05	1.14446e-05	1.0401e-05	2.4096e-05
1110	3.69131e-05	3.16308e-05	8.78308e-06	5.5066e-06	2.07084e-05
1111	3.46636e-05	3.08283e-05	8.51693e-06	5.5066e-06	1.98788e-05
1112	2.13708e-05	1.85536e-05	4.92385e-06	4.2829e-06	1.22828e-05
1113	2.94487e-05	2.8515e-05	1.23762e-05	6.1184e-06	1.91146e-05
1114	2.996e-05	3.06866e-05	1.41062e-05	6.1184e-06	2.02178e-05
1115	3.30276e-05	3.28583e-05	1.61023e-05	8.5658e-06	2.26385e-05
1116	3.98785e-05	3.9987e-05	2.10262e-05	9.1777e-06	2.75173e-05
1117	3.82424e-05	3.62574e-05	2.08931e-05	8.5658e-06	2.59897e-05
1118	5.56254e-05	5.34892e-05	3.61969e-05	1.1013e-05	3.90812e-05
1119	5.57276e-05	5.33947e-05	3.633e-05	1.1013e-05	3.91164e-05
1120	5.78749e-05	5.49527e-05	3.93908e-05	1.2237e-05	4.11138e-05
1121	8.82439e-05	7.81329e-05	6.97324e-05	6.0573e-05	7.41704e-05
1122	8.88574e-05	7.88883e-05	7.02647e-05	6.0573e-05	7.46457e-05
1123	8.89597e-05	7.94548e-05	7.05308e-05	6.1184e-05	7.50324e-05
1124	8.88574e-05	7.98797e-05	7.05308e-05	6.1184e-05	7.51131e-05
1125	8.86529e-05	8.02101e-05	7.14624e-05	6.1184e-05	7.53774e-05
1126	0.000110024	0.000100841	0.000101272	8.1375e-05	9.83779e-05
1127	0.000111864	0.000102965	0.000103268	8.1375e-05	9.98682e-05
1128	0.000115443	0.000108347	0.000106728	8.1375e-05	0.000102973
1129	0.00011575	0.000109811	0.000108724	8.1375e-05	0.000103915
1130	0.000128736	0.000124399	0.000133742	8.9941e-05	0.000119205
1131	0.000130474	0.000126193	0.000136271	9.1165e-05	0.000121026
1132	0.000130372	0.000126193	0.000136537	9.2388e-05	0.000121373
1133	0.000130474	0.000126523	0.000136537	9.2388e-05	0.000121481
1134	0.00013027	0.000126287	0.000136404	9.2388e-05	0.000121337
1135	0.00013027	0.000126146	0.000136404	9.2388e-05	0.000121302
1136	0.000130065	0.000126051	0.000136271	9.2388e-05	0.000121194
1137	0.000122294	0.000120339	0.000133343	9.2388e-05	0.000117091
1138	0.000114523	0.000115759	0.000132145	9.2388e-05	0.000113704
1139	0.000126282	0.000131197	0.000196688	0.00012482	0.000144746
1140	0.000128429	0.00013521	0.000210395	0.00012726	0.000150324
1141	0.000128634	0.000135399	0.000211326	0.00012726	0.000150656
1142	0.000128531	0.000135541	0.000211326	0.00012726	0.000150665
1143	0.000128736	0.000135871	0.000211859	0.00012726	0.000150932
1144	0.000128838	0.000135729	0.000211992	0.00012726	0.000150956
1145	0.000127202	0.000131716	0.000208532	0.00012604	0.000148373
1146	0.000126691	0.000131008	0.000207866	0.00012604	0.000147901
1147	0.000125668	0.000128789	0.000206536	0.00012604	0.000146758
1148	9.90827e-05	0.000106742	0.000190699	0.00011441	0.000127735
1149	0.000100412	0.000107262	0.00019203	0.00011441	0.00012853
1150	9.99007e-05	0.000106789	0.000191897	0.00011319	0.000127945
1151	7.127e-05	7.7472e-05	0.000179388	0.00010463	0.000108189
1152	7.2088e-05	7.78496e-05	0.000179521	0.00010463	0.000108521
1153	7.0043e-05	7.35063e-05	0.000176992	0.0001034	0.000105986
1154	7.15767e-05	7.58668e-05	0.00017646	0.0001034	0.000106826
1155	7.1679e-05	7.59612e-05	0.00017646	0.0001034	0.000106875
1156	6.71799e-05	7.10042e-05	0.000171004	9.973e-05	0.00010223
1157	7.01452e-05	7.44033e-05	0.000171536	9.973e-05	0.000103954
1158	7.02475e-05	7.43561e-05	0.000171536	9.973e-05	0.000103968
1159	6.99407e-05	7.31286e-05	0.000167411	9.6059e-05	0.000101635
1160	6.96339e-05	7.2326e-05	0.000165149	9.3612e-05	0.00010018
1161	6.97362e-05	7.2326e-05	0.000165149	9.1165e-05	9.95939e-05
1162	6.52371e-05	6.81243e-05	0.000158229	8.9329e-05	9.52298e-05
1163	2.50519e-05	3.20557e-05	5.19e-05	2.998e-05	3.4747e-05
1164	2.57676e-05	3.28583e-05	5.1767e-05	2.8757e-05	3.47874e-05
1165	2.27001e-05	2.69098e-05	4.01893e-05	2.5697e-05	2.88741e-05
1166	1.67694e-05	1.83648e-05	1.82316e-05	8.5658e-06	1.54829e-05
1167	1.88145e-05	2.12918e-05	2.19577e-05	8.5658e-06	1.76574e-05
1168	1.85077e-05	2.11974e-05	2.18246e-05	8.5658e-06	1.75239e-05
1169	1.54401e-05	1.59098e-05	7.18616e-06	4.8947e-06	1.08577e-05
1170	1.75874e-05	1.71373e-05	7.58539e-06	4.2829e-06	1.16483e-05
1171	1.77919e-05	1.71845e-05	7.45231e-06	4.2829e-06	1.16779e-05
1172	1.76897e-05	1.7751e-05	7.85154e-06	2.4474e-06	1.14349e-05
1173	1.82009e-05	1.87897e-05	1.18439e-05	3.0592e-06	1.29734e-05
1174	1.84054e-05	1.90729e-05	1.26423e-05	2.4474e-06	1.3142e-05
1175	1.82009e-05	1.85064e-05	1.26423e-05	2.4474e-06	1.29493e-05
1176	1.43153e-05	1.39742e-05	1.23762e-05	2.4474e-06	1.07783e-05
1177	1.71784e-05	1.88369e-05	1.42392e-05	4.2829e-06	1.36344e-05
1178	1.71784e-05	1.87897e-05	1.42392e-05	4.2829e-06	1.36226e-05
1179	1.72807e-05	1.88369e-05	1.42392e-05	4.2829e-06	1.36599e-05
1180	1.71784e-05	1.8648e-05	1.42392e-05	4.2829e-06	1.35871e-05
1181	1.70762e-05	1.86008e-05	1.42392e-05	4.2829e-06	1.35498e-05
1182	1.37018e-05	1.57682e-05	1.384e-05	4.2829e-06	1.18982e-05
1183	1.40086e-05	1.60515e-05	1.39731e-05	4.2829e-06	1.2079e-05
1184	1.40086e-05	1.60515e-05	1.41062e-05	4.2829e-06	1.21123e-05
1185	1.40086e-05	1.60515e-05	1.41062e-05	4.2829e-06	1.21123e-05
1186	1.27816e-05	1.43519e-05	1.31746e-05	2.4474e-06	1.06889e-05
1187	1.29861e-05	1.4588e-05	1.31746e-05	2.4474e-06	1.0799e-05
1188	1.29861e-05	1.4588e-05	1.31746e-05	2.4474e-06	1.0799e-05
1189	1.29861e-05	1.4588e-05	1.31746e-05	2.4474e-06	1.0799e-05
1190	1.29861e-05	1.45407e-05	1.31746e-05	2.4474e-06	1.07872e-05
1191	1.2168e-05	1.37854e-05	1.26423e-05	2.4474e-06	1.02608e-05
1192	1.2168e-05	1.37854e-05	1.26423e-05	2.4474e-06	1.02608e-05
1193	1.18613e-05	1.35965e-05	1.23762e-05	2.4474e-06	1.00703e-05
1194	1.18613e-05	1.32661e-05	1.22431e-05	2.4474e-06	9.95445e-06
1195	9.61173e-06	1.08583e-05	9.31539e-06	2.4474e-06	8.05821e-06
1196	9.40723e-06	1.04335e-05	9.04924e-06	2.4474e-06	7.83432e-06
1197	9.20272e-06	1.01502e-05	8.91616e-06	2.4474e-06	7.67911e-06
1198	1.63604e-06	1.88841e-06	6.65385e-07	6.1184e-07	1.20042e-06
1199	1.63604e-06	2.07725e-06	9.31539e-07	6.1184e-07	1.31417e-06
1200	9.20272e-07	1.18026e-06	7.98462e-07	6.1184e-07	8.77708e-07
1201	1.02252e-06	1.74678e-06	7.98462e-07	0	8.91941e-07
1202	1.02252e-06	2.03004e-06	5.32308e-07	0	8.96218e-07
1203	1.9428e-06	6.79827e-06	1.19769e-06	6.1184e-07	2.63765e-06
1204	2.04505e-06	7.17595e-06	1.19769e-06	6.1184e-07	2.75763e-06
1205	2.1473e-06	7.17595e-06	1.06462e-06	6.1184e-07	2.74993e-06
1206	2.1473e-06	7.22316e-06	1.06462e-06	6.1184e-07	2.76173e-06
1207	2.04505e-06	7.45921e-06	1.19769e-06	6.1184e-07	2.82845e-06
1208	2.55631e-06	9.63088e-06	1.33077e-06	6.1184e-07	3.53245e-06
1209	2.65856e-06	1.01502e-05	1.33077e-06	6.1184e-07	3.68784e-06
1210	2.86307e-06	1.07167e-05	1.33077e-06	6.1184e-07	3.8806e-06
1211	2.96532e-06	1.07167e-05	1.33077e-06	6.1184e-07	3.90616e-06
1212	3.68109e-06	1.14249e-05	1.33077e-06	6.1184e-07	4.26214e-06
1213	3.57884e-06	1.13777e-05	1.33077e-06	6.1184e-07	4.22478e-06
1214	3.37433e-06	1.14249e-05	1.33077e-06	6.1184e-07	4.18545e-06
1215	3.47658e-06	1.14249e-05	1.33077e-06	6.1184e-07	4.21102e-06
1216	3.47658e-06	1.14721e-05	1.33077e-06	6.1184e-07	4.22282e-06
1217	3.88559e-06	1.28884e-05	1.33077e-06	3.0592e-06	5.29099e-06
1218	3.98785e-06	1.303e-05	1.33077e-06	3.0592e-06	5.35196e-06
1219	3.78334e-06	1.28884e-05	1.19769e-06	3.0592e-06	5.23216e-06
1220	1.60536e-05	2.35107e-05	2.52846e-06	3.6711e-06	1.1441e-05
1221	1.64627e-05	2.36995e-05	2.52846e-06	3.6711e-06	1.15904e-05
1222	1.68717e-05	2.36051e-05	2.39539e-06	3.6711e-06	1.16358e-05
1223	1.69739e-05	2.38412e-05	2.39539e-06	3.6711e-06	1.17204e-05
1224	1.69739e-05	2.35107e-05	2.26231e-06	3.6711e-06	1.16045e-05
1225	1.69739e-05	2.35107e-05	2.26231e-06	3.6711e-06	1.16045e-05
1226	1.69739e-05	2.34635e-05	2.26231e-06	3.6711e-06	1.15927e-05
1227	1.69739e-05	2.3133e-05	2.26231e-06	3.6711e-06	1.15101e-05
1228	1.60536e-05	1.81287e-05	1.99616e-06	3.6711e-06	9.96239e-06
1229	1.61559e-05	1.73734e-05	1.73e-06	3.6711e-06	9.73258e-06
1230	1.55424e-05	1.47768e-05	1.46385e-06	3.0592e-06	8.71056e-06
1231	1.63604e-05	1.51545e-05	1.59692e-06	3.0592e-06	9.04275e-06
1232	1.70762e-05	1.50128e-05	1.59692e-06	3.0592e-06	9.18629e-06
1233	3.9265e-05	4.86265e-05	1.39731e-05	6.7303e-06	2.71487e-05
1234	4.03897e-05	5.30643e-05	1.47715e-05	6.7303e-06	2.8739e-05
1235	4.28438e-05	5.73604e-05	1.557e-05	6.7303e-06	3.06261e-05
1236	4.33551e-05	5.84934e-05	1.557e-05	6.7303e-06	3.10372e-05
1237	4.33551e-05	5.85407e-05	1.557e-05	6.7303e-06	3.1049e-05
1238	4.34573e-05	5.85407e-05	1.557e-05	6.7303e-06	3.10746e-05
1239	4.131e-05	5.63218e-05	1.53039e-05	6.7303e-06	2.99165e-05
1240	4.15145e-05	5.69355e-05	1.54369e-05	6.7303e-06	3.01543e-05
1241	4.12078e-05	5.67467e-05	1.53039e-05	6.7303e-06	2.99971e-05
1242	4.10032e-05	5.66995e-05	1.53039e-05	6.7303e-06	2.99342e-05
1243	3.33343e-05	4.97596e-05	1.47715e-05	6.7303e-06	2.61489e-05
1244	3.53794e-05	5.20729e-05	1.51708e-05	6.7303e-06	2.73383e-05
1245	3.53794e-05	5.22145e-05	1.51708e-05	6.7303e-06	2.73737e-05
1246	3.53794e-05	5.22145e-05	1.51708e-05	6.7303e-06	2.73737e-05
1247	3.54816e-05	5.22617e-05	1.51708e-05	6.7303e-06	2.74111e-05
1248	3.54816e-05	5.22617e-05	1.51708e-05	6.7303e-06	2.74111e-05
1249	3.54816e-05	5.21673e-05	1.50377e-05	6.7303e-06	2.73542e-05
1250	3.53794e-05	5.21673e-05	1.50377e-05	6.7303e-06	2.73287e-05
1251	3.53794e-05	5.21673e-05	1.50377e-05	6.7303e-06	2.73287e-05
1252	3.48681e-05	5.07982e-05	1.41062e-05	6.7303e-06	2.66257e-05
1253	3.48681e-05	5.06093e-05	1.39731e-05	6.7303e-06	2.65452e-05
1254	3.13915e-05	4.69742e-05	1.26423e-05	6.7303e-06	2.44346e-05
1255	6.13515e-06	9.15878e-06	1.46385e-06	1.2237e-06	4.49537e-06
1256	6.54416e-06	9.63088e-06	1.46385e-06	1.2237e-06	4.71564e-06
1257	6.54416e-06	9.63088e-06	1.46385e-06	1.2237e-06	4.71564e-06
1258	6.64641e-06	9.48925e-06	1.46385e-06	1.2237e-06	4.7058e-06
1259	4.90812e-06	5.66523e-06	1.06462e-06	6.1184e-07	3.06245e-06
1260	6.54416e-06	6.79827e-06	1.19769e-06	0	3.63503e-06
1261	6.64641e-06	6.51501e-06	1.19769e-06	0	3.58978e-06
1262	6.44191e-06	6.13733e-06	1.19769e-06	0	3.44423e-06
1263	5.72614e-06	5.0987e-06	7.98462e-07	0	2.90583e-06
1264	5.21488e-06	4.06008e-06	6.65385e-07	0	2.48509e-06
1265	6.85092e-06	4.76823e-06	7.98462e-07	0	3.1044e-06
1266	6.85092e-06	4.81544e-06	7.98462e-07	0	3.11621e-06
1267	6.54416e-06	4.48497e-06	9.31539e-07	0	2.99017e-06
1268	9.40723e-06	6.9399e-06	1.99616e-06	0	4.58582e-06
1269	9.61173e-06	7.03432e-06	1.99616e-06	0	4.66055e-06
1270	9.61173e-06	7.03432e-06	1.99616e-06	0	4.66055e-06
1271	9.50948e-06	7.03432e-06	1.99616e-06	0	4.63499e-06
1272	9.61173e-06	7.03432e-06	1.99616e-06	0	4.66055e-06
1273	9.40723e-06	6.65664e-06	1.99616e-06	0	4.51501e-06
1274	9.61173e-06	6.70385e-06	2.26231e-06	0	4.64447e-06
1275	9.40723e-06	5.94849e-06	2.26231e-06	0	4.40451e-06
1276	1.03275e-05	6.9399e-06	3.06077e-06	0	5.08204e-06
1277	1.04298e-05	6.70385e-06	3.06077e-06	0	5.04859e-06
1278	1.27816e-05	9.30041e-06	5.72231e-06	1.8355e-06	7.40995e-06
1279	1.28838e-05	9.34762e-06	5.72231e-06	1.8355e-06	7.44732e-06
1280	1.26793e-05	9.30041e-06	5.72231e-06	1.8355e-06	7.38439e-06
1281	1.26793e-05	9.39483e-06	5.72231e-06	1.8355e-06	7.408e-06
1282	1.26793e-05	9.34762e-06	5.72231e-06	1.8355e-06	7.39619e-06
1283	1.16568e-05	8.63947e-06	5.45616e-06	1.8355e-06	6.89698e-06
1284	1.18613e-05	9.48925e-06	5.72231e-06	1.8355e-06	7.2271e-06
1285	1.14523e-05	9.30041e-06	5.72231e-06	1.8355e-06	7.07763e-06
1286	1.11455e-05	9.44204e-06	5.98847e-06	2.4474e-06	7.25585e-06
1287	2.36203e-05	2.30386e-05	1.57031e-05	1.1013e-05	1.83438e-05
1288	2.38248e-05	2.29914e-05	1.57031e-05	1.1013e-05	1.83831e-05
1289	2.21888e-05	2.15751e-05	1.53039e-05	1.1013e-05	1.75202e-05
1290	2.63811e-05	2.52103e-05	1.82316e-05	1.1625e-05	2.0362e-05
1291	2.65856e-05	2.53519e-05	1.87639e-05	1.1625e-05	2.05816e-05
1292	2.65856e-05	2.53047e-05	1.84977e-05	1.1625e-05	2.05033e-05
1293	2.76082e-05	2.62489e-05	1.88969e-05	1.4072e-05	2.17066e-05
1294	2.77104e-05	2.63905e-05	1.903e-05	1.4072e-05	2.18008e-05
1295	2.79149e-05	2.6721e-05	1.91631e-05	1.4072e-05	2.19678e-05
1296	2.78127e-05	2.6721e-05	1.91631e-05	1.4072e-05	2.19423e-05
1297	2.75059e-05	2.6721e-05	1.88969e-05	1.4072e-05	2.17991e-05
1298	2.52564e-05	2.48326e-05	1.78323e-05	1.4072e-05	2.04984e-05
1299	2.62789e-05	2.62017e-05	1.903e-05	1.4684e-05	2.15487e-05
1300	2.61766e-05	2.62961e-05	1.92962e-05	1.4684e-05	2.16133e-05
1301	3.00622e-05	3.17253e-05	2.36877e-05	2.3862e-05	2.73343e-05
1302	3.02667e-05	3.17725e-05	2.36877e-05	2.5086e-05	2.77031e-05
1303	3.02667e-05	3.17725e-05	2.36877e-05	2.5086e-05	2.77031e-05
1304	3.02667e-05	3.17725e-05	2.35546e-05	2.5086e-05	2.76699e-05
1305	2.9142e-05	3.04506e-05	2.28892e-05	2.325e-05	2.6433e-05
1306	4.0083e-05	4.79656e-05	4.64439e-05	4.5888e-05	4.50952e-05
1307	4.0083e-05	4.81544e-05	4.61777e-05	4.65e-05	4.52288e-05
1308	4.0083e-05	4.82488e-05	4.61777e-05	4.65e-05	4.52524e-05
1309	3.98785e-05	4.79656e-05	4.60446e-05	4.65e-05	4.50972e-05
1310	3.9674e-05	4.77295e-05	4.53793e-05	4.5888e-05	4.46678e-05
1311	3.00622e-05	3.93733e-05	3.75277e-05	3.7322e-05	3.60714e-05
1312	2.48474e-05	3.31888e-05	3.52654e-05	3.7322e-05	3.2656e-05
1313	2.70969e-05	3.6824e-05	3.55316e-05	3.7322e-05	3.41937e-05
1314	2.73014e-05	3.6824e-05	3.55316e-05	3.7322e-05	3.42448e-05
1315	2.44383e-05	3.46995e-05	3.46e-05	3.6711e-05	3.26121e-05
1316	2.85284e-05	4.17338e-05	3.72616e-05	3.9158e-05	3.66705e-05
1317	2.86307e-05	4.19227e-05	3.72616e-05	3.9158e-05	3.67432e-05
1318	2.86307e-05	4.20171e-05	3.73946e-05	3.9158e-05	3.68001e-05
1319	2.86307e-05	4.20171e-05	3.73946e-05	3.9158e-05	3.68001e-05
1320	2.79149e-05	4.11201e-05	3.633e-05	3.9158e-05	3.61308e-05
1321	2.80172e-05	4.12145e-05	3.60639e-05	3.9158e-05	3.61134e-05
1322	2.80172e-05	4.1545e-05	3.633e-05	3.9158e-05	3.62625e-05
1323	2.79149e-05	4.12145e-05	3.60639e-05	3.9158e-05	3.60878e-05
1324	2.75059e-05	4.09785e-05	3.52654e-05	3.9158e-05	3.57269e-05
1325	2.20865e-05	3.24806e-05	2.56839e-05	3.4263e-05	2.86286e-05
1326	2.90397e-05	4.28669e-05	2.99423e-05	3.6711e-05	3.46399e-05
1327	2.86307e-05	4.01287e-05	2.71477e-05	3.6711e-05	3.31544e-05
1328	2.87329e-05	4.02703e-05	2.71477e-05	3.6711e-05	3.32154e-05
1329	2.86307e-05	3.97038e-05	2.64823e-05	3.6711e-05	3.28819e-05
1330	2.85284e-05	3.96566e-05	2.60831e-05	3.6711e-05	3.27447e-05
1331	2.67902e-05	3.67295e-05	2.30223e-05	3.3651e-05	3.00484e-05
1332	2.0246e-05	2.79957e-05	1.384e-05	2.2026e-05	2.1027e-05
1333	2.24955e-05	3.00257e-05	1.34408e-05	2.1415e-05	2.18441e-05
1334	2.17798e-05	2.95536e-05	1.31746e-05	1.9579e-05	2.10217e-05
1335	2.16775e-05	2.95064e-05	1.33077e-05	1.9579e-05	2.10177e-05
1336	2.01437e-05	2.65321e-05	1.19769e-05	1.7132e-05	1.89461e-05
1337	2.09618e-05	2.73347e-05	1.211e-05	1.7132e-05	1.93845e-05
1338	2.09618e-05	2.72875e-05	1.211e-05	1.7132e-05	1.93727e-05
1339	2.1064e-05	2.72875e-05	1.211e-05	1.7132e-05	1.93983e-05
1340	1.9837e-05	2.55407e-05	1.05131e-05	1.7132e-05	1.82556e-05
1341	1.73829e-05	2.34163e-05	9.04924e-06	1.5908e-05	1.64391e-05
1342	1.82009e-05	2.38884e-05	9.18231e-06	1.5908e-05	1.67949e-05
1343	1.83032e-05	2.39356e-05	9.18231e-06	1.5908e-05	1.68323e-05
1344	1.82009e-05	2.35579e-05	8.78308e-06	1.5908e-05	1.66125e-05
1345	1.49289e-05	1.73734e-05	6.78693e-06	1.2849e-05	1.29845e-05
1346	1.37018e-05	1.57682e-05	6.78693e-06	1.2237e-05	1.21235e-05
1347	7.87344e-06	7.55363e-06	2.66154e-06	9.1777e-06	6.81657e-06
1348	8.79371e-06	9.11157e-06	2.79462e-06	8.5658e-06	7.31643e-06
1349	9.81624e-06	9.81972e-06	2.39539e-06	6.7303e-06	7.19041e-06
1350	1.76897e-05	1.8412e-05	3.72616e-06	6.7303e-06	1.16395e-05
1351	1.87122e-05	1.90257e-05	3.72616e-06	6.7303e-06	1.20486e-05
1352	1.92235e-05	1.95922e-05	3.72616e-06	6.7303e-06	1.2318e-05
1353	1.87122e-05	1.94506e-05	3.32693e-06	6.7303e-06	1.2055e-05
1354	1.85077e-05	1.85064e-05	3.32693e-06	6.1184e-07	1.02382e-05
1355	1.80987e-05	1.76094e-05	3.06077e-06	0	9.69222e-06
1356	1.9428e-05	1.85064e-05	3.06077e-06	0	1.02488e-05
1357	1.9019e-05	1.82231e-05	2.92769e-06	0	1.00424e-05
1358	3.39478e-05	3.43218e-05	5.32308e-06	0	1.83982e-05
1359	3.44591e-05	3.53604e-05	5.58923e-06	0	1.88522e-05
1360	3.44591e-05	3.54077e-05	5.58923e-06	0	1.8864e-05
1361	3.46636e-05	3.55965e-05	5.58923e-06	0	1.89623e-05
1362	3.47658e-05	3.56437e-05	5.58923e-06	0	1.89997e-05
1363	3.45613e-05	3.56437e-05	5.58923e-06	0	1.89486e-05
1364	3.42546e-05	3.57853e-05	5.45616e-06	0	1.8874e-05
1365	3.48681e-05	3.59742e-05	5.45616e-06	0	1.90746e-05
1366	3.49704e-05	3.59742e-05	5.45616e-06	0	1.91002e-05
1367	3.49704e-05	3.59742e-05	5.45616e-06	0	1.91002e-05
1368	3.1596e-05	3.27639e-05	4.79077e-06	0	1.72877e-05
1369	3.85492e-05	3.8854e-05	6.92e-06	3.0592e-06	2.18456e-05
1370	3.87537e-05	3.92789e-05	7.05308e-06	3.0592e-06	2.20362e-05
1371	3.85492e-05	3.92317e-05	7.05308e-06	3.0592e-06	2.19733e-05
1372	3.73222e-05	3.82403e-05	6.52077e-06	3.0592e-06	2.12856e-05
1373	3.70154e-05	3.80514e-05	6.52077e-06	3.0592e-06	2.11617e-05
1374	3.59929e-05	3.55965e-05	6.12154e-06	3.0592e-06	2.01925e-05
1375	3.29253e-05	3.17253e-05	5.45616e-06	3.0592e-06	1.82915e-05
1376	3.49704e-05	3.43218e-05	5.85539e-06	3.6711e-06	1.97047e-05
1377	3.22095e-05	3.28111e-05	5.72231e-06	3.6711e-06	1.86035e-05
1378	7.06565e-05	7.0296e-05	2.422e-05	4.8947e-06	4.25168e-05
1379	7.127e-05	7.209e-05	2.43531e-05	5.5066e-06	4.33049e-05
1380	7.127e-05	7.209e-05	2.46192e-05	5.5066e-06	4.33715e-05
1381	7.1679e-05	7.33175e-05	2.46192e-05	5.5066e-06	4.37806e-05
1382	7.15767e-05	7.33647e-05	2.46192e-05	5.5066e-06	4.37668e-05
1383	7.2088e-05	7.36951e-05	2.48854e-05	5.5066e-06	4.40438e-05
1384	6.88159e-05	7.09097e-05	2.48854e-05	5.5066e-06	4.25294e-05
1385	0.000130781	0.000127845	5.49608e-05	7.954e-06	8.03852e-05
1386	0.000139166	0.000139034	5.6957e-05	9.1777e-06	8.60836e-05
1387	0.000139575	0.000139789	5.6957e-05	9.1777e-06	8.63747e-05
1388	0.000140393	0.000140639	5.709e-05	9.1777e-06	8.68249e-05
1389	0.000141108	0.000140875	5.72231e-05	9.1777e-06	8.70961e-05
1390	0.000141313	0.000141017	5.72231e-05	9.1777e-06	8.71827e-05
1391	0.000140802	0.000140922	5.74893e-05	9.1777e-06	8.70978e-05
1392	0.000142335	0.000141489	5.81547e-05	9.1777e-06	8.77892e-05
1393	0.000149289	0.00014536	5.82877e-05	9.1777e-06	9.05286e-05
1394	0.000151334	0.000146824	5.82877e-05	9.1777e-06	9.14057e-05
1395	0.000151743	0.000147343	5.82877e-05	9.1777e-06	9.16378e-05
1396	0.000149289	0.000144558	5.72231e-05	9.1777e-06	9.00618e-05
1397	0.000153481	0.000147437	5.68239e-05	1.0401e-05	9.20359e-05
1398	0.000153276	0.000146729	5.62916e-05	1.0401e-05	9.16747e-05
1399	0.000134564	0.000126004	5.15008e-05	1.0401e-05	8.06176e-05
1400	0.000178942	0.000162734	6.34777e-05	1.7743e-05	0.000105724
1401	0.000180169	0.000163819	6.32116e-05	1.7132e-05	0.000106083
1402	0.000181294	0.000164386	6.36108e-05	1.7132e-05	0.000106606
1403	0.0001816	0.00016415	6.30785e-05	1.7132e-05	0.00010649
1404	0.000181396	0.000163442	6.25462e-05	1.7132e-05	0.000106129
1405	0.000155322	0.000132047	4.72423e-05	1.1013e-05	8.6406e-05
1406	0.000179453	0.000154	6.24131e-05	1.5908e-05	0.000102943
1407	0.000192132	0.000159476	6.54739e-05	1.7743e-05	0.000108706
1408	0.000197041	0.000158721	6.37439e-05	1.7743e-05	0.000109312
1409	0.000212685	0.00017024	6.72039e-05	1.7743e-05	0.000116968
1410	0.000215548	0.000170476	6.61393e-05	1.7743e-05	0.000117477
1411	0.00021698	0.000167171	6.28123e-05	1.7743e-05	0.000116177
1412	0.000219945	0.000168918	6.17477e-05	1.7743e-05	0.000117089
1413	0.000219638	0.000168965	6.13485e-05	1.7743e-05	0.000116924
1414	0.000216878	0.000162639	5.96185e-05	1.7132e-05	0.000114067
1415	0.000211049	0.000154047	5.46947e-05	1.5908e-05	0.000108925
1416	0.000193257	0.000137807	4.77746e-05	1.5908e-05	9.86866e-05
1417	0.000207164	0.000151356	5.74893e-05	1.9579e-05	0.000108897
1418	0.000207573	0.000152253	5.77554e-05	2.0191e-05	0.000109443
1419	0.00020747	0.000152347	5.6957e-05	2.0191e-05	0.000109241
1420	0.000206448	0.000151922	5.66908e-05	2.0803e-05	0.000108966
1421	0.000191928	0.00013894	5.48277e-05	2.0191e-05	0.000101472
1422	0.00020021	0.000148287	5.90862e-05	2.0803e-05	0.000107097
1423	0.000191723	0.000144652	5.65577e-05	2.0803e-05	0.000103434
1424	0.000191826	0.000145077	5.65577e-05	2.0803e-05	0.000103566
1425	0.000190599	0.000144463	5.50939e-05	2.0803e-05	0.00010274
1426	0.000189883	0.000144369	5.46947e-05	2.0803e-05	0.000102437
1427	0.000154095	0.000130725	4.63108e-05	1.7743e-05	8.72185e-05
1428	0.000142029	0.000125579	4.44477e-05	1.7743e-05	8.24498e-05
1429	0.000101332	9.83389e-05	3.60639e-05	1.5296e-05	6.27578e-05
1430	0.000103582	9.99912e-05	3.71285e-05	1.652e-05	6.43053e-05
1431	0.000102968	9.9708e-05	3.69954e-05	1.652e-05	6.40479e-05
1432	0.000102764	9.94247e-05	3.71285e-05	1.652e-05	6.39592e-05
1433	9.61173e-05	9.48925e-05	3.53985e-05	1.5908e-05	6.05791e-05
1434	7.35195e-05	7.87466e-05	3.19385e-05	1.4684e-05	4.97222e-05
1435	7.28038e-05	7.78496e-05	3.19385e-05	1.4684e-05	4.9319e-05
1436	5.24555e-05	5.12703e-05	2.50185e-05	1.2849e-05	3.53983e-05
1437	5.36826e-05	4.97596e-05	2.44862e-05	1.1625e-05	3.48883e-05
1438	5.37848e-05	4.97596e-05	2.44862e-05	1.1625e-05	3.49139e-05
1439	5.37848e-05	4.91458e-05	2.43531e-05	1.1625e-05	3.47272e-05
1440	5.36826e-05	4.87681e-05	2.43531e-05	1.1625e-05	3.46072e-05
1441	4.2128e-05	3.9987e-05	2.249e-05	1.1013e-05	2.89046e-05
1442	1.16568e-05	1.15193e-05	7.71847e-06	6.1184e-06	9.25324e-06
1443	1.9837e-05	2.09141e-05	1.74331e-05	1.2849e-05	1.77582e-05
1444	2.03482e-05	2.13862e-05	2.03608e-05	1.3461e-05	1.8889e-05
1445	2.15753e-05	2.403e-05	2.27562e-05	1.4684e-05	2.07614e-05
1446	2.24955e-05	2.43133e-05	2.28892e-05	1.5296e-05	2.12485e-05
1447	2.15753e-05	2.33691e-05	2.22239e-05	1.4072e-05	2.03101e-05
1448	5.98177e-05	6.7605e-05	6.64054e-05	7.8928e-05	6.8189e-05
1449	6.18628e-05	7.15235e-05	6.82685e-05	8.0151e-05	7.04516e-05
1450	6.21695e-05	7.14763e-05	6.82685e-05	8.0151e-05	7.05164e-05
1451	6.20673e-05	7.19484e-05	6.85347e-05	8.0151e-05	7.06754e-05
1452	6.20673e-05	7.19011e-05	6.85347e-05	8.0151e-05	7.06636e-05
1453	6.1147e-05	7.16651e-05	6.88008e-05	8.0151e-05	7.04411e-05
1454	0.000104809	0.000130914	0.000153172	0.00015541	0.000136076
1455	0.000107161	0.000137193	0.000157696	0.00015602	0.000139517
1456	0.000116772	0.000151025	0.000176194	0.00016642	0.000152603
1457	0.000132417	0.000168116	0.000211459	0.00020925	0.000180311
1458	0.000134155	0.000170146	0.000212657	0.00020925	0.000181552
1459	0.000134871	0.000171043	0.000213056	0.00020925	0.000182055
1460	0.000135178	0.000172034	0.000213322	0.00020925	0.000182446
1461	0.000135178	0.000171987	0.000213322	0.00020925	0.000182434
1462	0.000134973	0.000173073	0.000215319	0.00020741	0.000182695
1463	0.00015164	0.000201115	0.000248588	0.00023189	0.000208308
1464	0.000152049	0.000201682	0.000248987	0.0002325	0.000208805
1465	0.000152254	0.000201163	0.000248056	0.0002325	0.000208493
1466	0.000152458	0.000201588	0.000248056	0.0002325	0.000208651
1467	0.000152152	0.000200313	0.00024739	0.0002325	0.000208089
1468	0.000140597	0.000186339	0.000235413	0.00022944	0.000197948
1469	0.000143358	0.000188982	0.000236744	0.00023128	0.00020009
1470	0.000143358	0.00018851	0.000235946	0.00023066	0.00019962
1471	0.000131906	0.000174347	0.000223436	0.00021843	0.000187029
1472	0.000144585	0.0001853	0.000229691	0.00023984	0.000199855
1473	0.000140086	0.000179304	0.000221839	0.00023617	0.00019435
1474	0.000127509	0.000165566	0.000210262	0.00023128	0.000183653
1475	0.000195405	0.000222927	0.000258968	0.00025636	0.000233415
1476	0.000197756	0.000224673	0.000260432	0.00025636	0.000234806
1477	0.000196223	0.000219339	0.000255907	0.00025453	0.000231499
1478	0.000197756	0.000220094	0.000257105	0.00025453	0.00023237
1479	0.000197143	0.000218583	0.000255508	0.00025453	0.00023144
1480	0.000197654	0.000218442	0.000255641	0.00025453	0.000231566
1481	0.000197347	0.000217309	0.000254976	0.00025453	0.00023104
1482	0.000197143	0.000215609	0.000252048	0.00025269	0.000229373
1483	0.000165138	0.000175339	0.000182848	0.00018478	0.000177025
1484	0.000189474	0.000182467	0.000209729	0.00019395	0.000193906
1485	0.000196836	0.000185583	0.000220509	0.00019457	0.000199374
1486	0.000188963	0.000164386	0.00019895	0.00016887	0.000180292
1487	0.000200006	0.000167927	0.000206802	0.00017009	0.000186207
1488	0.000200517	0.000167785	0.000206136	0.00016826	0.000185674
1489	0.00017567	0.000131764	0.000161289	0.00011992	0.000147161
1490	0.000200517	0.000149043	0.000184578	0.00012665	0.000165197
1491	0.000200517	0.000148854	0.000184711	0.00012665	0.000165183
1492	0.000181191	0.000132802	0.000169274	0.00010401	0.00014682
1493	0.000223217	0.000160704	0.000214919	0.0001242	0.000180761
1494	0.00022925	0.000163867	0.000217847	0.00012482	0.000183945
1495	0.000237124	0.000167407	0.000223436	0.00013032	0.000189572
1496	0.000239066	0.000166935	0.000221972	0.00013032	0.000189574
1497	0.000236408	0.000162639	0.000220908	0.00012788	0.000186958
1498	0.000262789	0.000177746	0.000234482	0.00013644	0.000202865
1499	0.0002633	0.000177888	0.000234615	0.0001395	0.000203826
1500	0.000263811	0.000178266	0.000234615	0.0001395	0.000204048
1501	0.000263811	0.000176094	0.000233417	0.00013889	0.000203053
1502	0.000263914	0.000176189	0.000233417	0.00013889	0.000203102
1503	0.000264118	0.000176	0.000233018	0.00013889	0.000203006
1504	0.000253688	0.000166463	0.000225432	0.00013583	0.000195353
1505	0.000255631	0.000168493	0.000227961	0.00013583	0.000196979
1506	0.000255733	0.000168682	0.000227828	0.00013583	0.000197018
1507	0.000255631	0.000168776	0.000227562	0.00013583	0.00019695
1508	0.000254915	0.00016821	0.000226231	0.00013583	0.000196296
1509	0.000254915	0.00016821	0.000225699	0.00013583	0.000196163
1510	0.000254404	0.00016788	0.000225166	0.00013522	0.000195667
1511	0.000254302	0.000167832	0.000224767	0.00013522	0.00019553
1512	0.000244588	0.000159854	0.000213589	0.00013461	0.000188159
1513	0.000232215	0.000151262	0.000204406	0.00011747	0.000176339
1514	0.000218207	0.000140025	0.000184977	0.00011258	0.000163947
1515	0.000218002	0.000140073	0.000183779	0.00011258	0.000163608
1516	0.000216264	0.000138656	0.000181118	0.00011013	0.000161543
1517	0.000163399	0.000107167	0.000129883	8.3211e-05	0.000120915
1518	9.33565e-05	6.75578e-05	6.37439e-05	3.304e-05	6.44244e-05
1519	9.47881e-05	6.83604e-05	6.26793e-05	3.3651e-05	6.48698e-05
1520	6.57484e-05	4.3575e-05	4.09877e-05	2.5086e-05	4.38492e-05
1521	9.36633e-05	6.89741e-05	4.325e-05	2.5086e-05	5.77433e-05
1522	9.37655e-05	6.8266e-05	4.16531e-05	2.4474e-05	5.70396e-05
1523	9.17205e-05	6.75106e-05	4.04554e-05	2.325e-05	5.57341e-05
1524	9.0698e-05	6.71329e-05	3.99231e-05	2.2026e-05	5.49451e-05
1525	6.72821e-05	5.72188e-05	2.74139e-05	1.7132e-05	4.22616e-05
1526	9.33565e-05	9.14934e-05	3.85923e-05	2.0803e-05	6.10612e-05
1527	9.36633e-05	9.29569e-05	3.87254e-05	2.0803e-05	6.15371e-05
1528	9.38678e-05	9.30985e-05	3.84593e-05	2.0803e-05	6.15571e-05
1529	9.45836e-05	9.40427e-05	3.84593e-05	2.0803e-05	6.19721e-05
1530	9.47881e-05	9.42788e-05	3.85923e-05	2.0803e-05	6.21155e-05
1531	9.44813e-05	9.42788e-05	3.87254e-05	2.0803e-05	6.2072e-05
1532	9.69354e-05	9.49869e-05	3.87254e-05	2.0803e-05	6.28626e-05
1533	9.75489e-05	9.54118e-05	3.87254e-05	2.0803e-05	6.31222e-05
1534	9.77534e-05	9.50814e-05	3.85923e-05	2.0803e-05	6.30574e-05
1535	9.82646e-05	9.5223e-05	3.85923e-05	2.0803e-05	6.32207e-05
1536	9.85714e-05	9.55063e-05	3.81931e-05	2.0803e-05	6.32684e-05
1537	9.82646e-05	9.49397e-05	3.77939e-05	2.0803e-05	6.29502e-05
1538	9.67309e-05	9.3193e-05	3.67293e-05	2.0803e-05	6.18639e-05
1539	9.66286e-05	9.32874e-05	3.64631e-05	2.0803e-05	6.17954e-05
1540	9.29475e-05	8.5781e-05	3.35354e-05	2.0191e-05	5.81137e-05
1541	9.2743e-05	8.57337e-05	3.34023e-05	2.0191e-05	5.80175e-05
1542	9.10047e-05	8.31372e-05	3.287e-05	1.7743e-05	5.61888e-05
1543	4.22303e-05	4.94291e-05	1.33077e-05	4.8947e-06	2.74655e-05
1544	4.66271e-05	5.37252e-05	1.34408e-05	4.8947e-06	2.9672e-05
1545	4.70361e-05	5.46222e-05	1.33077e-05	4.8947e-06	2.99652e-05
1546	4.48888e-05	5.04205e-05	1.18439e-05	4.8947e-06	2.8012e-05
1547	4.51956e-05	4.98068e-05	1.18439e-05	4.2829e-06	2.77823e-05
1548	4.51956e-05	4.99484e-05	1.18439e-05	4.2829e-06	2.78177e-05
1549	4.50933e-05	4.98068e-05	1.17108e-05	4.2829e-06	2.77234e-05
1550	4.27415e-05	4.61244e-05	9.71462e-06	3.6711e-06	2.55629e-05
1551	3.78334e-05	3.76737e-05	6.12154e-06	3.0592e-06	2.1172e-05
1552	3.72199e-05	3.5266e-05	5.98847e-06	2.4474e-06	2.02304e-05
1553	3.71177e-05	3.51716e-05	5.98847e-06	2.4474e-06	2.01813e-05
1554	3.65041e-05	3.35665e-05	5.85539e-06	2.4474e-06	1.95933e-05
1555	1.04298e-05	9.44204e-06	6.65385e-07	1.8355e-06	5.59318e-06
1556	1.27816e-05	1.16137e-05	9.31539e-07	1.2237e-06	6.63762e-06
1557	1.26793e-05	1.16137e-05	9.31539e-07	1.2237e-06	6.61206e-06
1558	1.07365e-05	1.0339e-05	5.32308e-07	6.1184e-07	5.55492e-06
1559	1.35996e-05	1.43991e-05	7.98462e-07	6.1184e-07	7.35225e-06
1560	1.35996e-05	1.45407e-05	7.98462e-07	6.1184e-07	7.38766e-06
1561	1.35996e-05	1.45407e-05	7.98462e-07	6.1184e-07	7.38766e-06
1562	1.35996e-05	1.44935e-05	7.98462e-07	6.1184e-07	7.37586e-06
1563	1.35996e-05	1.40214e-05	9.31539e-07	6.1184e-07	7.2911e-06
1564	1.29861e-05	1.29828e-05	9.31539e-07	6.1184e-07	6.87806e-06
1565	1.44176e-05	1.37854e-05	1.33077e-06	6.1184e-07	7.5364e-06
1566	1.44176e-05	1.37854e-05	1.33077e-06	6.1184e-07	7.5364e-06
1567	1.31906e-05	1.33605e-05	1.33077e-06	6.1184e-07	7.12342e-06
1568	1.12478e-05	1.12832e-05	1.19769e-06	6.1184e-07	6.08514e-06
1569	1.19635e-05	1.15193e-05	1.19769e-06	6.1184e-07	6.32309e-06
1570	1.12478e-05	1.09056e-05	1.19769e-06	6.1184e-07	5.99072e-06
1571	9.71399e-06	9.34762e-06	1.19769e-06	6.1184e-07	5.21779e-06
1572	1.06343e-05	9.77251e-06	1.59692e-06	2.4474e-06	6.11277e-06
1573	1.08388e-05	9.53646e-06	1.59692e-06	2.4474e-06	6.10488e-06
1574	1.80987e-05	1.66652e-05	4.52462e-06	7.3421e-06	1.16577e-05
1575	1.88145e-05	1.75622e-05	5.05693e-06	7.3421e-06	1.21939e-05
1576	1.85077e-05	1.74678e-05	5.19e-06	7.3421e-06	1.21269e-05
1577	2.11663e-05	2.05837e-05	5.85539e-06	1.2849e-05	1.51135e-05
1578	2.16775e-05	2.10085e-05	6.12154e-06	1.2849e-05	1.54141e-05
1579	2.01437e-05	1.87897e-05	6.12154e-06	1.2849e-05	1.44759e-05
1580	2.2291e-05	2.27553e-05	9.04924e-06	1.5296e-05	1.73479e-05
1581	2.1882e-05	2.20472e-05	9.18231e-06	1.5296e-05	1.71019e-05
1582	4.82632e-05	5.59913e-05	3.56646e-05	2.8757e-05	4.21689e-05
1583	4.85699e-05	5.69355e-05	3.61969e-05	2.8757e-05	4.26148e-05
1584	4.90812e-05	5.84934e-05	3.64631e-05	2.8757e-05	4.31986e-05
1585	4.91834e-05	5.87767e-05	3.64631e-05	2.8757e-05	4.3295e-05
1586	4.90812e-05	5.87767e-05	3.64631e-05	2.8757e-05	4.32694e-05
1587	4.90812e-05	5.89656e-05	3.64631e-05	2.8757e-05	4.33166e-05
1588	4.91834e-05	5.89656e-05	3.64631e-05	2.8757e-05	4.33422e-05
1589	4.73429e-05	5.83518e-05	3.633e-05	2.8757e-05	4.26953e-05
1590	7.82232e-05	9.49869e-05	7.23939e-05	3.304e-05	6.96609e-05
1591	8.93687e-05	0.000112738	8.79639e-05	3.3651e-05	8.09305e-05
1592	9.3561e-05	0.000117081	8.99601e-05	3.4263e-05	8.37164e-05
1593	9.56061e-05	0.000121519	9.22224e-05	3.4263e-05	8.59027e-05
1594	9.73444e-05	0.000124729	9.38193e-05	3.4263e-05	8.75391e-05
1595	9.72421e-05	0.000124588	9.40854e-05	3.4263e-05	8.75446e-05
1596	0.000126384	0.000151592	0.000109522	3.7322e-05	0.000106205
1597	0.000126589	0.000152442	0.000109655	3.7322e-05	0.000106502
1598	0.000126691	0.000152395	0.000109655	3.7322e-05	0.000106516
1599	0.000126895	0.000152395	0.000109655	3.7322e-05	0.000106567
1600	0.000126895	0.0001523	0.000109655	3.7322e-05	0.000106543
1601	0.000124339	0.000149987	0.000109389	3.7322e-05	0.000105259
1602	0.000120044	0.000147154	0.000109655	3.7322e-05	0.000103544
1603	0.000153072	0.000183978	0.000126157	4.5888e-05	0.000127274
1604	0.000153685	0.0001853	0.000126556	4.5888e-05	0.000127858
1605	0.000153685	0.000185725	0.000126689	4.65e-05	0.00012815
1606	0.00015389	0.000186197	0.000126689	4.65e-05	0.000128319
1607	0.00015389	0.000186386	0.000126556	4.65e-05	0.000128333
1608	0.000152561	0.000183317	0.000124028	4.5888e-05	0.000126448
1609	0.000152561	0.000183223	0.000124028	4.5888e-05	0.000126425
1610	0.000151743	0.000181146	0.000122963	4.5888e-05	0.000125435
1611	0.000151129	0.000180437	0.000122298	4.5888e-05	0.000124938
1612	0.00013436	0.000162734	0.000112849	3.977e-05	0.000112428
1613	0.000110228	0.000133322	9.80778e-05	2.7533e-05	9.22901e-05
1614	0.000110842	0.000133133	9.82108e-05	2.6309e-05	9.21236e-05
1615	0.000103684	0.000121897	8.84962e-05	2.5086e-05	8.47906e-05
1616	7.23948e-05	7.79913e-05	4.28508e-05	1.2237e-05	5.13684e-05
1617	8.93687e-05	9.59311e-05	5.09685e-05	1.2849e-05	6.22793e-05
1618	8.97777e-05	9.73947e-05	5.13677e-05	1.3461e-05	6.30002e-05
1619	9.01867e-05	9.86693e-05	5.16339e-05	1.3461e-05	6.34876e-05
1620	8.53808e-05	9.46093e-05	4.57785e-05	1.3461e-05	5.98073e-05
1621	9.00844e-05	9.85749e-05	4.72423e-05	1.3461e-05	6.23406e-05
1622	9.00844e-05	9.66865e-05	4.60446e-05	1.3461e-05	6.1569e-05
1623	8.68124e-05	9.23432e-05	4.37823e-05	1.2237e-05	5.87937e-05
1624	7.65871e-05	7.72831e-05	3.72616e-05	9.7895e-06	5.02303e-05
1625	5.64434e-05	5.36308e-05	2.54177e-05	6.7303e-06	3.55555e-05
1626	7.72006e-05	7.16651e-05	3.806e-05	7.954e-06	4.87199e-05
1627	8.42561e-05	8.05878e-05	4.25846e-05	7.954e-06	5.38456e-05
1628	8.39493e-05	8.05406e-05	4.24516e-05	7.954e-06	5.37239e-05
1629	8.35403e-05	8.01157e-05	4.25846e-05	7.954e-06	5.35487e-05
1630	8.54831e-05	8.05878e-05	4.29839e-05	9.7895e-06	5.47111e-05
1631	8.48696e-05	7.96908e-05	4.29839e-05	9.7895e-06	5.43334e-05
1632	8.56876e-05	7.99741e-05	4.3117e-05	9.7895e-06	5.4642e-05
1633	8.56876e-05	7.9738e-05	4.3117e-05	9.7895e-06	5.4583e-05
1634	7.81209e-05	7.32702e-05	3.93908e-05	9.7895e-06	5.01429e-05
1635	8.37448e-05	7.57252e-05	3.979e-05	9.7895e-06	5.22624e-05
1636	8.33358e-05	7.49698e-05	3.92577e-05	9.7895e-06	5.18382e-05
1637	8.35403e-05	7.50642e-05	3.92577e-05	9.7895e-06	5.19129e-05
1638	8.36425e-05	7.49226e-05	3.91246e-05	9.7895e-06	5.18698e-05
1639	8.3438e-05	7.42144e-05	3.91246e-05	9.7895e-06	5.16417e-05
1640	8.32335e-05	7.33175e-05	3.88585e-05	9.7895e-06	5.12997e-05
1641	8.3029e-05	7.25621e-05	3.84593e-05	9.7895e-06	5.096e-05
1642	8.27223e-05	7.22316e-05	3.84593e-05	9.7895e-06	5.08007e-05
1643	8.2211e-05	7.14763e-05	3.77939e-05	9.7895e-06	5.03177e-05
1644	6.39078e-05	5.13647e-05	2.82123e-05	3.0592e-06	3.6636e-05
1645	6.32943e-05	5.11287e-05	2.80792e-05	3.0592e-06	3.63904e-05
1646	3.41523e-05	1.97339e-05	9.98078e-06	1.8355e-06	1.64256e-05
1647	3.72199e-05	2.52575e-05	1.35739e-05	2.4474e-06	1.96246e-05
1648	2.78127e-05	1.85064e-05	9.98078e-06	2.4474e-06	1.46868e-05
1649	4.62181e-05	4.5369e-05	3.24708e-05	1.2849e-05	3.42267e-05
1650	4.66271e-05	4.6266e-05	3.24708e-05	1.2849e-05	3.45532e-05
1651	4.45821e-05	4.56995e-05	3.24708e-05	1.2849e-05	3.39003e-05
1652	4.2537e-05	4.51802e-05	3.35354e-05	1.2849e-05	3.35253e-05
1653	7.88367e-05	7.81329e-05	0.000104332	0.00012849	9.74473e-05
1654	8.24155e-05	8.37981e-05	0.000113515	0.00014501	0.000106184
1655	8.31313e-05	8.45063e-05	0.000115112	0.00014501	0.000106939
1656	8.31313e-05	8.48367e-05	0.000116043	0.00014501	0.000107255
1657	8.33358e-05	8.55921e-05	0.000116176	0.00014868	0.000108446
1658	8.1802e-05	8.44119e-05	0.000116176	0.00014868	0.000107767
1659	8.41538e-05	8.57337e-05	0.000123495	0.00016275	0.000114033
1660	9.57083e-05	9.40427e-05	0.000143856	0.00020068	0.000133573
1661	9.34588e-05	9.33818e-05	0.000144255	0.00020068	0.000132945
1662	0.000152561	0.00013894	0.000277466	0.00034447	0.000228358
1663	0.000154606	0.000140309	0.000281325	0.00034936	0.0002314
1664	0.000155628	0.000141961	0.000282922	0.0003512	0.000232927
1665	0.0001589	0.000143	0.000283853	0.00035181	0.000234391
1666	0.000158594	0.000143141	0.000283587	0.00035242	0.000234436
1667	0.000158798	0.000143519	0.000286382	0.00035242	0.00023528
1668	0.000157264	0.000143141	0.000289442	0.00035793	0.000236944
1669	0.000156958	0.000144888	0.000296629	0.00036405	0.00024063
1670	0.000150209	0.000138892	0.000297693	0.00037751	0.000241076
1671	0.000372097	0.000304789	0.000772645	0.00169052	0.000785014
1672	0.000384981	0.000319613	0.000794337	0.00172723	0.000806541
1673	0.000395206	0.000332454	0.000822815	0.0017615	0.000827993
1674	0.000403693	0.000341896	0.000843708	0.00179454	0.000845959
1675	0.000404818	0.000342982	0.000845837	0.00179576	0.000847349
1676	0.000405431	0.000343738	0.000846769	0.00179698	0.00084823
1677	0.000406249	0.000344257	0.000847701	0.00179821	0.000849104
1678	0.000407067	0.000344729	0.000848366	0.00179821	0.000849592
1679	0.000407578	0.000344776	0.000848499	0.00179821	0.000849765
1680	0.000407987	0.000345154	0.000848765	0.00179821	0.000850029
1681	0.000408601	0.00034624	0.00084983	0.00179882	0.000850873
1682	0.00040901	0.000347986	0.00085156	0.00180066	0.000852303
1683	0.000412487	0.000351952	0.000860343	0.00181718	0.000860489
1684	0.000429665	0.000365737	0.000873917	0.00183492	0.000876059
1685	0.00042854	0.000367484	0.000877776	0.00183859	0.000878097
1686	0.000437027	0.000373952	0.000896939	0.00185694	0.000891216
1687	0.000462897	0.000394913	0.000922623	0.00187163	0.000913016
1688	0.000472304	0.000403222	0.000929277	0.00187714	0.000920485
1689	0.000473838	0.000404355	0.000931805	0.00187958	0.000922395
1690	0.000473531	0.000403883	0.000930341	0.00188081	0.000922141
1691	0.000473838	0.000404544	0.000929144	0.00188081	0.000922083
1692	0.00042537	0.00036215	0.000841845	0.00180004	0.000857352
1693	0.000435493	0.000373291	0.000867263	0.00182329	0.000874835
1694	0.000411771	0.000343077	0.000802055	0.00176578	0.000830671
1695	0.000420871	0.000355021	0.000810838	0.00177312	0.000839963
1696	0.00042128	0.000355304	0.000812568	0.00177435	0.000840875
1697	0.000420973	0.000355257	0.000812435	0.00177373	0.0008406
1698	0.000419337	0.000353416	0.000807911	0.00177129	0.000837988
1699	0.00041811	0.000352849	0.000806181	0.00176639	0.000835883
1700	0.000417906	0.000351622	0.000805116	0.00176456	0.0008348
1701	0.000417292	0.000350347	0.000802721	0.00175966	0.000832505
1702	0.000412998	0.000347042	0.000794736	0.00175232	0.000826774
1703	0.000409726	0.000342793	0.000783557	0.00172785	0.000815981
1704	0.000409112	0.000341377	0.000781827	0.0017254	0.000814429
1705	0.000404	0.000335429	0.000767322	0.00170521	0.000802989
1706	0.000398273	0.000329811	0.0007443	0.00165504	0.000781855
1707	0.000204403	0.000195309	0.000355848	0.00061307	0.000342157
1708	0.000204403	0.000198188	0.000355449	0.00061001	0.000342012
1709	0.000175261	0.000171704	0.000308339	0.00053292	0.000297055
1710	8.94709e-05	0.000109858	0.000197619	0.00032795	0.000181224
1711	0.000115239	0.000145643	0.000227695	0.00035059	0.000209791
1712	0.000118102	0.000149704	0.000227828	0.00034997	0.000211402
1713	0.000118306	0.000150128	0.000227562	0.00035059	0.000211646
1714	9.68331e-05	0.000124635	0.000173399	0.00023372	0.000157148
1715	0.000131292	0.000159665	0.000196289	0.00024963	0.000184219
1716	0.000133746	0.000164103	0.000196555	0.00025147	0.000186468
1717	0.000115034	0.000150081	0.000149046	0.00021047	0.000156159
1718	0.000115545	0.000150459	0.00014878	0.00021047	0.000156315
1719	0.000115341	0.000149987	0.000147982	0.00020741	0.000155181
1720	0.000115239	0.000150742	0.000148115	0.00020741	0.000155378
1721	0.000112989	0.000146965	0.000142792	0.00020007	0.000150705
1722	0.000103786	0.000134171	0.000121233	0.00017009	0.000132321
1723	0.000104093	0.000132802	0.000120035	0.00016214	0.000129767
1724	9.48903e-05	0.000113068	9.83439e-05	0.00010157	0.000101967
1725	0.000102866	0.000123219	9.90093e-05	0.00010157	0.000106665
1726	0.000102866	0.000123644	9.8477e-05	0.00010095	0.000106485
1727	0.000102968	0.000124918	9.51501e-05	9.4224e-05	0.000104315
1728	0.000113296	0.000137665	9.74124e-05	9.4836e-05	0.000110802
1729	0.000115341	0.000141064	9.76785e-05	9.5448e-05	0.000112383
1730	0.00011483	0.000139081	9.44847e-05	8.9329e-05	0.000109431
1731	0.000114932	0.000139317	9.44847e-05	8.9329e-05	0.000109516
1732	0.000114625	0.000138515	9.39524e-05	8.8105e-05	0.000108799
1733	0.000114625	0.000137618	9.3287e-05	8.7494e-05	0.000108256
1734	7.53601e-05	9.7253e-05	5.42954e-05	4.8336e-05	6.8811e-05
1735	7.97569e-05	0.000101455	5.45616e-05	4.8336e-05	7.10272e-05
1736	7.99614e-05	0.000101313	5.44285e-05	4.8336e-05	7.10097e-05
1737	7.98592e-05	0.000100652	5.37631e-05	4.7724e-05	7.04996e-05
1738	7.27015e-05	9.40427e-05	4.41816e-05	4.0994e-05	6.29798e-05
1739	4.01852e-05	5.22145e-05	1.15777e-05	1.1013e-05	2.87477e-05
1740	7.07587e-05	7.85578e-05	4.51131e-05	1.1013e-05	5.13607e-05
1741	8.3438e-05	9.26264e-05	6.401e-05	1.1013e-05	6.27719e-05
1742	8.57898e-05	9.61672e-05	6.5607e-05	1.1013e-05	6.46443e-05
1743	9.20272e-05	0.000101313	7.22608e-05	1.1013e-05	6.91536e-05
1744	9.83669e-05	0.000105326	7.83824e-05	1.1013e-05	7.32721e-05
1745	0.000101639	0.000108017	8.31731e-05	1.1013e-05	7.59606e-05
1746	0.000105422	0.000108631	8.65001e-05	1.1013e-05	7.78916e-05
1747	0.000102866	0.000100794	8.66331e-05	8.5658e-06	7.47147e-05
1748	0.00010757	0.000104759	8.96939e-05	8.5658e-06	7.76472e-05
1749	0.000108388	0.000105609	8.9827e-05	8.5658e-06	7.80974e-05
1750	0.000109103	0.000105892	8.9827e-05	8.5658e-06	7.83472e-05
1751	0.000109103	0.000105704	8.9827e-05	8.5658e-06	7.83e-05
1752	0.000109001	0.000105562	8.9827e-05	8.5658e-06	7.8239e-05
1753	0.000109001	0.000105562	8.9827e-05	8.5658e-06	7.8239e-05
1754	0.000109103	0.000105468	8.9827e-05	8.5658e-06	7.8241e-05
1755	0.000109103	0.000105468	8.9827e-05	8.5658e-06	7.8241e-05
1756	0.000108592	0.000104807	8.9827e-05	8.5658e-06	7.79479e-05
1757	0.00010849	0.000104759	8.9827e-05	8.5658e-06	7.79105e-05
1758	0.000108388	0.000104665	8.9827e-05	8.5658e-06	7.78614e-05
1759	0.000108388	0.000104665	8.9827e-05	8.5658e-06	7.78614e-05
1760	0.000108388	0.000104665	8.9827e-05	8.5658e-06	7.78614e-05
1761	0.000108388	0.000104523	8.9827e-05	8.5658e-06	7.7826e-05
1762	0.000108388	0.000104523	8.9827e-05	8.5658e-06	7.7826e-05
1763	0.000108388	0.000104476	8.9827e-05	8.5658e-06	7.78142e-05
1764	0.000108285	0.00010424	8.9827e-05	8.5658e-06	7.77296e-05
1765	0.000108183	0.00010424	8.95608e-05	8.5658e-06	7.76375e-05
1766	0.000107876	0.000104146	8.90285e-05	8.5658e-06	7.74041e-05
1767	0.000102559	9.75363e-05	7.22608e-05	8.5658e-06	7.02305e-05
1768	0.000101639	9.52702e-05	7.01316e-05	8.5658e-06	6.89016e-05
1769	1.02252e-06	5.66523e-07	4.12539e-06	6.1184e-07	1.58157e-06
1770	9.59128e-05	7.24677e-05	0.00020241	5.1395e-05	0.000105546
1771	9.80601e-05	7.54419e-05	0.000205471	5.2007e-05	0.000107745
1772	9.85714e-05	7.58196e-05	0.000205471	5.2007e-05	0.000107967
1773	9.91849e-05	7.63861e-05	0.000205471	5.2619e-05	0.000108415
1774	9.92872e-05	7.64333e-05	0.000205471	5.2619e-05	0.000108452
1775	9.92872e-05	7.64805e-05	0.000205471	5.2619e-05	0.000108464
1776	9.92872e-05	7.65277e-05	0.000205471	5.2619e-05	0.000108476
1777	9.92872e-05	7.65277e-05	0.000205471	5.2619e-05	0.000108476
1778	9.92872e-05	7.6575e-05	0.000205471	5.2619e-05	0.000108488
1779	9.92872e-05	7.66222e-05	0.000205471	5.2619e-05	0.0001085
1780	9.93894e-05	7.67166e-05	0.000205737	5.2619e-05	0.000108615
1781	9.93894e-05	7.6811e-05	0.000205737	5.2619e-05	0.000108639
1782	9.93894e-05	7.68582e-05	0.000205737	5.2619e-05	0.000108651
1783	9.93894e-05	7.68582e-05	0.000205737	5.2619e-05	0.000108651
1784	9.93894e-05	7.69054e-05	0.000205737	5.2619e-05	0.000108663
1785	9.93894e-05	7.70943e-05	0.00020587	5.2619e-05	0.000108743
1786	9.95939e-05	7.71415e-05	0.00020587	5.2619e-05	0.000108806
1787	9.95939e-05	7.72359e-05	0.00020587	5.2619e-05	0.00010883
1788	9.97984e-05	7.74247e-05	0.000206402	5.2619e-05	0.000109061
1789	9.88782e-05	7.59612e-05	0.000203076	5.1395e-05	0.000107327
1790	9.46858e-05	7.1193e-05	0.000188703	4.3441e-05	9.95057e-05
1791	9.05957e-05	6.73218e-05	0.000176859	3.977e-05	9.36367e-05
1792	8.44606e-05	6.22703e-05	0.000161822	3.2428e-05	8.5245e-05
1793	6.95317e-05	5.12703e-05	0.000129218	2.8145e-05	6.95411e-05
1794	4.0901e-05	3.23862e-05	7.93139e-05	2.325e-05	4.39628e-05
1795	5.17398e-05	4.17338e-05	8.14431e-05	2.9368e-05	5.10713e-05
1796	5.13307e-05	4.03647e-05	7.75839e-05	2.8757e-05	4.9509e-05
1797	5.17398e-05	4.12145e-05	7.75839e-05	2.8757e-05	4.98237e-05
1798	5.13307e-05	4.01759e-05	7.45231e-05	2.7533e-05	4.83907e-05
1799	3.49704e-05	2.53519e-05	3.31362e-05	1.8355e-05	2.79534e-05
1800	4.33551e-05	3.01201e-05	3.35354e-05	1.8967e-05	3.14944e-05
1801	4.35596e-05	3.04978e-05	3.35354e-05	1.8967e-05	3.164e-05
1802	4.37641e-05	3.06394e-05	3.35354e-05	1.8967e-05	3.17265e-05
1803	4.15145e-05	2.78068e-05	2.39539e-05	9.1777e-06	2.56132e-05
1804	3.55839e-05	2.28497e-05	9.18231e-06	7.3421e-06	1.87395e-05
1805	4.22303e-05	2.77596e-05	1.02469e-05	7.3421e-06	2.18947e-05
1806	4.2128e-05	2.76652e-05	9.98078e-06	7.3421e-06	2.1779e-05
1807	4.22303e-05	2.77596e-05	9.98078e-06	7.3421e-06	2.18282e-05
1808	4.19235e-05	2.7854e-05	9.8477e-06	7.3421e-06	2.17418e-05
1809	3.9674e-05	2.75236e-05	8.51693e-06	7.3421e-06	2.07641e-05
1810	3.57884e-05	2.70042e-05	7.58539e-06	7.3421e-06	1.943e-05
1811	3.9265e-05	2.87038e-05	1.01139e-05	7.3421e-06	2.13562e-05
1812	3.94695e-05	2.87982e-05	9.98078e-06	7.3421e-06	2.13976e-05
1813	3.42546e-05	2.61545e-05	7.85154e-06	7.3421e-06	1.89007e-05
1814	4.0901e-05	2.91287e-05	1.13115e-05	7.3421e-06	2.21708e-05
1815	4.0901e-05	2.91759e-05	1.13115e-05	7.3421e-06	2.21826e-05
1816	4.0901e-05	2.90815e-05	1.13115e-05	7.3421e-06	2.2159e-05
1817	4.0901e-05	2.91287e-05	1.13115e-05	7.3421e-06	2.21708e-05
1818	4.07987e-05	2.91287e-05	1.13115e-05	7.3421e-06	2.21453e-05
1819	3.9674e-05	2.7854e-05	1.02469e-05	7.3421e-06	2.12793e-05
1820	4.35596e-05	3.0545e-05	1.09123e-05	7.3421e-06	2.30898e-05
1821	4.34573e-05	3.04034e-05	1.06462e-05	7.3421e-06	2.29622e-05
1822	3.9674e-05	2.54935e-05	9.8477e-06	6.1184e-06	2.02834e-05
1823	6.44191e-05	4.89098e-05	3.34023e-05	9.7895e-06	3.91302e-05
1824	6.48281e-05	5.02789e-05	3.39346e-05	9.7895e-06	3.97078e-05
1825	6.58506e-05	5.13647e-05	3.48662e-05	9.7895e-06	4.04677e-05
1826	6.61574e-05	5.1884e-05	3.55316e-05	9.7895e-06	4.08406e-05
1827	6.62596e-05	5.18368e-05	3.55316e-05	9.7895e-06	4.08544e-05
1828	6.61574e-05	5.20729e-05	3.57977e-05	9.7895e-06	4.09544e-05
1829	6.66686e-05	5.19312e-05	3.57977e-05	9.7895e-06	4.10468e-05
1830	6.79979e-05	5.20257e-05	3.60639e-05	9.7895e-06	4.14692e-05
1831	6.79979e-05	5.20257e-05	3.59308e-05	9.7895e-06	4.1436e-05
1832	6.89182e-05	5.21673e-05	3.59308e-05	9.7895e-06	4.17014e-05
1833	6.91227e-05	5.24978e-05	3.60639e-05	9.7895e-06	4.18685e-05
1834	6.88159e-05	5.21673e-05	3.59308e-05	9.7895e-06	4.16759e-05
1835	6.89182e-05	5.1648e-05	3.59308e-05	9.7895e-06	4.15716e-05
1836	7.05542e-05	5.33475e-05	3.65962e-05	1.0401e-05	4.27248e-05
1837	7.06565e-05	5.3442e-05	3.67293e-05	1.0401e-05	4.28073e-05
1838	7.06565e-05	5.3442e-05	3.67293e-05	1.0401e-05	4.28073e-05
1839	7.07587e-05	5.3442e-05	3.67293e-05	1.0401e-05	4.28328e-05
1840	7.11677e-05	5.35364e-05	3.65962e-05	1.0401e-05	4.29254e-05
1841	7.13722e-05	5.34892e-05	3.65962e-05	1.0401e-05	4.29647e-05
1842	7.17812e-05	5.3442e-05	3.65962e-05	1.0401e-05	4.30552e-05
1843	7.17812e-05	5.33003e-05	3.633e-05	1.0401e-05	4.29532e-05
1844	7.17812e-05	5.33003e-05	3.633e-05	1.0401e-05	4.29532e-05
1845	7.15767e-05	5.30171e-05	3.59308e-05	1.0401e-05	4.27315e-05
1846	7.127e-05	5.2545e-05	3.52654e-05	1.0401e-05	4.23704e-05
1847	7.127e-05	5.25922e-05	3.52654e-05	1.0401e-05	4.23822e-05
1848	6.91227e-05	4.92875e-05	3.16723e-05	9.7895e-06	3.9968e-05
1849	6.91227e-05	4.9193e-05	3.16723e-05	9.7895e-06	3.99444e-05
1850	6.78957e-05	4.806e-05	2.72808e-05	9.7895e-06	3.82565e-05
1851	6.60551e-05	4.65021e-05	2.60831e-05	9.7895e-06	3.71074e-05
1852	1.03275e-05	8.12016e-06	3.46e-06	1.8355e-06	5.9358e-06
1853	1.43153e-05	1.17081e-05	5.45616e-06	1.8355e-06	8.32879e-06
1854	1.41108e-05	1.18498e-05	5.19e-06	6.1184e-07	7.94061e-06
1855	1.10433e-05	8.92273e-06	4.25846e-06	6.1184e-07	6.20908e-06
1856	2.57676e-05	2.31802e-05	8.78308e-06	9.7895e-06	1.68801e-05
1857	2.76082e-05	2.50686e-05	9.71462e-06	9.7895e-06	1.80452e-05
1858	2.77104e-05	2.51158e-05	9.44847e-06	9.7895e-06	1.80161e-05
1859	2.88352e-05	2.53519e-05	9.44847e-06	9.7895e-06	1.83563e-05
1860	2.94487e-05	2.56351e-05	9.44847e-06	9.7895e-06	1.85805e-05
1861	3.00622e-05	2.59184e-05	1.01139e-05	9.7895e-06	1.8971e-05
1862	3.00622e-05	2.61072e-05	1.05131e-05	9.7895e-06	1.9118e-05
1863	2.96532e-05	2.62961e-05	1.06462e-05	1.0401e-05	1.92492e-05
1864	3.01645e-05	2.64377e-05	1.09123e-05	1.0401e-05	1.9479e-05
1865	2.92442e-05	2.57768e-05	1.05131e-05	1.0401e-05	1.89839e-05
1866	2.94487e-05	2.52103e-05	1.01139e-05	1.0401e-05	1.87935e-05
1867	5.20465e-05	4.42832e-05	2.91439e-05	1.4684e-05	3.50395e-05
1868	5.24555e-05	4.48969e-05	2.941e-05	1.4684e-05	3.53617e-05
1869	5.29668e-05	4.55106e-05	2.98093e-05	1.5296e-05	3.58957e-05
1870	5.31713e-05	4.57939e-05	2.98093e-05	1.5296e-05	3.60176e-05
1871	5.34781e-05	4.58411e-05	2.98093e-05	1.5296e-05	3.61061e-05
1872	5.2251e-05	4.51802e-05	3.02085e-05	1.5296e-05	3.57339e-05
1873	8.00637e-05	7.05793e-05	8.09108e-05	3.6711e-05	6.70661e-05
1874	8.0575e-05	7.16179e-05	8.14431e-05	3.6711e-05	6.75866e-05
1875	8.04727e-05	7.15235e-05	8.1177e-05	3.6711e-05	6.74709e-05
1876	8.0575e-05	7.19011e-05	8.1177e-05	3.6711e-05	6.75909e-05
1877	8.04727e-05	7.19011e-05	8.13101e-05	3.6711e-05	6.75986e-05
1878	7.79164e-05	7.01072e-05	8.1177e-05	3.6711e-05	6.64778e-05
1879	7.63826e-05	6.92574e-05	8.1177e-05	3.6711e-05	6.58819e-05
1880	7.65871e-05	6.97767e-05	8.21085e-05	3.7322e-05	6.64487e-05
1881	7.64849e-05	6.98239e-05	8.21085e-05	3.7322e-05	6.64349e-05
1882	7.07587e-05	6.60943e-05	8.18424e-05	3.7322e-05	6.40045e-05
1883	7.90412e-05	7.44505e-05	8.38385e-05	3.7934e-05	6.88161e-05
1884	7.91434e-05	7.46866e-05	8.39716e-05	3.7934e-05	6.8934e-05
1885	7.91434e-05	7.46866e-05	8.39716e-05	3.7934e-05	6.8934e-05
1886	7.14745e-05	6.80771e-05	8.34393e-05	3.7322e-05	6.50783e-05
1887	7.38263e-05	7.46393e-05	8.42377e-05	3.7322e-05	6.75065e-05
1888	7.39285e-05	7.44505e-05	8.37054e-05	3.7322e-05	6.73517e-05
1889	7.39285e-05	7.43561e-05	8.37054e-05	3.7322e-05	6.73281e-05
1890	7.38263e-05	7.38368e-05	8.34393e-05	3.7322e-05	6.71062e-05
1891	7.36218e-05	7.37423e-05	8.33062e-05	3.6711e-05	6.68452e-05
1892	7.36218e-05	7.36479e-05	8.26408e-05	3.6711e-05	6.66553e-05
1893	6.29875e-05	6.66608e-05	7.29262e-05	3.4875e-05	5.93624e-05
1894	4.84677e-05	5.60857e-05	5.32308e-05	2.6921e-05	4.61763e-05
1895	4.70361e-05	5.35364e-05	5.12346e-05	2.6921e-05	4.46821e-05
1896	2.36203e-05	3.08755e-05	1.59692e-05	9.1777e-06	1.99107e-05
1897	2.75059e-05	4.0884e-05	2.10262e-05	1.2849e-05	2.55662e-05
1898	2.67902e-05	4.01287e-05	2.076e-05	1.2237e-05	2.49789e-05
1899	2.60744e-05	3.93261e-05	1.91631e-05	1.0401e-05	2.37412e-05
1900	2.57676e-05	3.9751e-05	1.86308e-05	9.1777e-06	2.33318e-05
1901	2.50519e-05	3.96566e-05	1.83646e-05	9.1777e-06	2.30627e-05
1902	2.46428e-05	3.88068e-05	1.80985e-05	9.1777e-06	2.26814e-05
1903	1.68717e-05	3.13476e-05	1.17108e-05	5.5066e-06	1.63592e-05
1904	2.42338e-05	4.94291e-05	2.32885e-05	6.1184e-06	2.57675e-05
1905	2.45406e-05	4.99484e-05	2.35546e-05	6.1184e-06	2.60405e-05
1906	2.46428e-05	5.00428e-05	2.35546e-05	6.1184e-06	2.60897e-05
1907	2.50519e-05	5.08454e-05	2.39539e-05	6.1184e-06	2.64924e-05
1908	2.52564e-05	5.06566e-05	2.40869e-05	6.1184e-06	2.65296e-05
1909	2.51541e-05	4.99956e-05	2.36877e-05	7.3421e-06	2.65449e-05
1910	2.49496e-05	4.9854e-05	2.40869e-05	7.3421e-06	2.65582e-05
1911	2.46428e-05	4.92875e-05	2.38208e-05	7.3421e-06	2.62733e-05
1912	2.36203e-05	4.68797e-05	2.36877e-05	7.3421e-06	2.53825e-05
1913	1.97347e-05	4.20643e-05	2.30223e-05	5.5066e-06	2.2582e-05
1914	2.45406e-05	5.14119e-05	2.422e-05	5.5066e-06	2.64198e-05
1915	2.45406e-05	5.15535e-05	2.422e-05	5.5066e-06	2.64552e-05
1916	2.46428e-05	5.1884e-05	2.43531e-05	5.5066e-06	2.65966e-05
1917	2.31091e-05	4.87681e-05	2.35546e-05	4.8947e-06	2.50816e-05
1918	2.11663e-05	4.5369e-05	2.06269e-05	4.8947e-06	2.30142e-05
1919	3.00622e-05	5.5708e-05	2.68816e-05	4.8947e-06	2.93866e-05
1920	3.08803e-05	5.58497e-05	2.72808e-05	4.8947e-06	2.97264e-05
1921	3.26185e-05	5.72188e-05	2.87446e-05	4.8947e-06	3.08692e-05
1922	3.54816e-05	5.96737e-05	3.06077e-05	4.8947e-06	3.26644e-05
1923	3.66064e-05	6.0193e-05	3.19385e-05	4.8947e-06	3.34082e-05
1924	3.60951e-05	5.88711e-05	3.12731e-05	4.8947e-06	3.27835e-05
1925	3.50726e-05	5.71716e-05	3.03416e-05	4.8947e-06	3.18701e-05
1926	3.51749e-05	5.71244e-05	3.02085e-05	4.8947e-06	3.18506e-05
1927	3.48681e-05	5.60385e-05	2.96762e-05	4.8947e-06	3.13694e-05
1928	3.10848e-05	4.94291e-05	2.46192e-05	4.2829e-06	2.7354e-05
1929	3.09825e-05	4.93819e-05	2.46192e-05	4.2829e-06	2.73166e-05
1930	3.08803e-05	4.92875e-05	2.44862e-05	4.2829e-06	2.72342e-05
1931	2.9551e-05	4.69269e-05	2.35546e-05	4.2829e-06	2.60789e-05
1932	2.9551e-05	4.69269e-05	2.35546e-05	4.2829e-06	2.60789e-05
1933	2.94487e-05	4.68325e-05	2.35546e-05	4.2829e-06	2.60297e-05
1934	2.69947e-05	4.25364e-05	2.18246e-05	4.2829e-06	2.39096e-05
1935	2.60744e-05	3.98454e-05	2.14254e-05	4.2829e-06	2.2907e-05
1936	2.52564e-05	3.71544e-05	2.10262e-05	3.6711e-06	2.1777e-05
1937	2.49496e-05	3.56909e-05	2.08931e-05	3.0592e-06	2.11482e-05
1938	2.27001e-05	3.04978e-05	1.76992e-05	3.0592e-06	1.84891e-05
1939	1.861e-05	2.44549e-05	1.50377e-05	3.0592e-06	1.52904e-05
1940	1.85077e-05	2.3133e-05	1.47715e-05	3.0592e-06	1.48679e-05
1941	1.31906e-05	1.55794e-05	9.44847e-06	3.0592e-06	1.03194e-05
1942	5.21488e-06	4.86265e-06	3.32693e-06	3.0592e-06	4.11592e-06
1943	5.31713e-06	4.86265e-06	3.06077e-06	3.0592e-06	4.07494e-06
1944	1.53379e-06	1.27468e-06	2.66154e-07	1.2237e-06	1.07458e-06
1945	3.16983e-06	3.63519e-06	5.32308e-07	6.1184e-07	1.98729e-06
1946	4.60136e-06	5.94849e-06	1.19769e-06	6.1184e-07	3.08985e-06
1947	4.90812e-06	5.38196e-06	1.33077e-06	1.2237e-06	3.21114e-06
1948	1.24748e-05	1.26051e-05	4.25846e-06	6.1184e-06	8.86421e-06
1949	1.27816e-05	1.303e-05	4.25846e-06	6.1184e-06	9.04712e-06
1950	1.28838e-05	1.31716e-05	4.25846e-06	6.1184e-06	9.10809e-06
1951	1.28838e-05	1.32661e-05	4.25846e-06	6.1184e-06	9.1317e-06
1952	1.31906e-05	1.33133e-05	4.25846e-06	6.1184e-06	9.22019e-06
1953	1.32928e-05	1.33605e-05	4.6577e-06	6.1184e-06	9.35736e-06
1954	2.56654e-05	1.94506e-05	1.50377e-05	7.3421e-06	1.6874e-05
1955	2.58699e-05	1.96867e-05	1.50377e-05	7.3421e-06	1.69841e-05
1956	2.59721e-05	1.99227e-05	1.50377e-05	7.3421e-06	1.70687e-05
1957	2.59721e-05	2.01588e-05	1.50377e-05	7.3421e-06	1.71277e-05
1958	2.59721e-05	2.0206e-05	1.50377e-05	7.3421e-06	1.71395e-05
1959	2.59721e-05	2.0206e-05	1.50377e-05	7.3421e-06	1.71395e-05
1960	2.59721e-05	2.0206e-05	1.50377e-05	7.3421e-06	1.71395e-05
1961	2.59721e-05	2.0206e-05	1.50377e-05	7.3421e-06	1.71395e-05
1962	2.61766e-05	2.03476e-05	1.51708e-05	7.3421e-06	1.72593e-05
1963	2.61766e-05	2.03476e-05	1.51708e-05	7.3421e-06	1.72593e-05
1964	2.55631e-05	1.96867e-05	1.49046e-05	7.3421e-06	1.68741e-05
1965	2.34158e-05	1.60515e-05	1.45054e-05	7.3421e-06	1.53287e-05
1966	2.73014e-05	2.01588e-05	1.57031e-05	7.3421e-06	1.76263e-05
1967	2.73014e-05	2.03476e-05	1.57031e-05	7.3421e-06	1.76736e-05
1968	2.73014e-05	2.03948e-05	1.57031e-05	7.3421e-06	1.76854e-05
1969	2.73014e-05	2.0442e-05	1.57031e-05	7.3421e-06	1.76972e-05
1970	2.73014e-05	2.03948e-05	1.57031e-05	7.3421e-06	1.76854e-05
1971	2.69947e-05	1.96394e-05	1.53039e-05	7.3421e-06	1.732e-05
1972	2.69947e-05	1.96394e-05	1.53039e-05	7.3421e-06	1.732e-05
1973	2.66879e-05	1.93562e-05	1.50377e-05	7.3421e-06	1.7106e-05
1974	2.35181e-05	1.71373e-05	1.30415e-05	6.7303e-06	1.51068e-05
1975	2.04505e-05	1.35493e-05	1.09123e-05	4.2829e-06	1.22988e-05
1976	1.73829e-05	1.26523e-05	1.01139e-05	4.2829e-06	1.1108e-05
1977	8.69146e-06	6.75106e-06	3.06077e-06	2.4474e-06	5.23767e-06
1978	9.91849e-06	7.97853e-06	3.32693e-06	1.8355e-06	5.76487e-06
1979	9.71399e-06	7.97853e-06	3.32693e-06	6.1184e-07	5.40782e-06
1980	8.58921e-06	7.412e-06	2.39539e-06	0	4.59915e-06
1981	1.15545e-05	1.19914e-05	3.59308e-06	0	6.78475e-06
1982	1.15545e-05	1.19914e-05	3.72616e-06	0	6.81802e-06
1983	1.08388e-05	1.19442e-05	3.72616e-06	0	6.62728e-06
1984	1.48266e-05	1.65708e-05	7.45231e-06	1.8355e-06	1.01713e-05
1985	1.49289e-05	1.65708e-05	7.45231e-06	1.8355e-06	1.01969e-05
1986	1.35996e-05	1.35965e-05	6.52077e-06	1.8355e-06	8.88811e-06
1987	2.00415e-05	2.3133e-05	1.07792e-05	4.2829e-06	1.45592e-05
1988	2.01437e-05	2.32274e-05	1.07792e-05	4.2829e-06	1.46083e-05
1989	2.00415e-05	2.31802e-05	1.09123e-05	4.2829e-06	1.46042e-05
1990	2.01437e-05	2.32274e-05	1.09123e-05	4.2829e-06	1.46416e-05
1991	2.01437e-05	2.32274e-05	1.09123e-05	4.2829e-06	1.46416e-05
1992	1.92235e-05	2.22832e-05	1.09123e-05	4.2829e-06	1.41755e-05
1993	2.28023e-05	2.66266e-05	1.26423e-05	4.2829e-06	1.65885e-05
1994	2.32113e-05	2.68154e-05	1.26423e-05	4.2829e-06	1.6738e-05
1995	2.32113e-05	2.70042e-05	1.26423e-05	4.2829e-06	1.67852e-05
1996	2.25978e-05	2.64849e-05	1.19769e-05	4.2829e-06	1.63356e-05
1997	2.39271e-05	2.83261e-05	1.25092e-05	4.2829e-06	1.72613e-05
1998	2.41316e-05	2.8751e-05	1.25092e-05	4.2829e-06	1.74187e-05
1999	2.21888e-05	2.80429e-05	1.23762e-05	4.2829e-06	1.67227e-05
[truncated: 7,179 more rows]

## Sheet: CANC_K158A_SP1_T8I
bp	CLIP46_density	CLIP48_density	CLIP54_density	average
1	4.14735e-06	1.03833e-06	5.24133e-06	3.47567e-06
2	6.87853e-06	1.92834e-06	9.84348e-06	6.21678e-06
3	7.43488e-06	2.52167e-06	1.03548e-05	6.77046e-06
4	9.10394e-06	3.41167e-06	1.419e-05	8.90185e-06
5	9.91318e-06	3.85667e-06	1.50848e-05	9.61822e-06
6	1.0773e-05	4.005e-06	1.59797e-05	1.02526e-05
7	1.1127e-05	4.005e-06	1.66189e-05	1.05836e-05
8	1.35042e-05	4.74667e-06	1.91756e-05	1.24755e-05
9	1.55273e-05	5.19167e-06	2.01983e-05	1.36391e-05
10	1.85113e-05	5.48834e-06	2.22437e-05	1.54145e-05
11	1.99275e-05	5.78501e-06	2.27551e-05	1.61559e-05
12	2.00287e-05	5.93334e-06	2.31386e-05	1.63669e-05
13	2.0231e-05	6.37834e-06	2.37778e-05	1.67957e-05
14	5.07292e-05	1.7355e-05	8.01541e-05	4.94127e-05
15	5.16901e-05	1.7355e-05	8.2583e-05	5.05427e-05
16	5.255e-05	1.7355e-05	8.47562e-05	5.15537e-05
17	5.27523e-05	1.7355e-05	8.52676e-05	5.17916e-05
18	5.35109e-05	1.76517e-05	8.56511e-05	5.22712e-05
19	7.03532e-05	3.26334e-05	9.88183e-05	6.72683e-05
20	7.10107e-05	3.293e-05	9.93297e-05	6.77568e-05
21	7.27303e-05	3.35234e-05	0.000100097	6.87835e-05
22	7.26292e-05	3.36717e-05	0.000100352	6.88844e-05
23	9.4681e-05	4.361e-05	0.000153661	9.73172e-05
24	0.000123864	5.1175e-05	0.000219113	0.000131384
25	0.000128871	5.162e-05	0.000228318	0.00013627
26	0.000130591	5.17684e-05	0.000230747	0.000137702
27	0.000132007	5.17684e-05	0.000233431	0.000139069
28	0.000132563	5.162e-05	0.000234709	0.000139631
29	0.000133272	5.2955e-05	0.000238672	0.000141633
30	0.000124016	5.10267e-05	0.00022998	0.000135007
31	0.000157852	6.40801e-05	0.000339792	0.000187241
32	0.00016291	6.60084e-05	0.000355516	0.000194811
33	0.000166501	6.67501e-05	0.000364592	0.000199281
34	0.00016903	6.77884e-05	0.00036945	0.000202089
35	0.000169434	6.77884e-05	0.000369578	0.000202267
36	0.000169131	6.70467e-05	0.000369067	0.000201748
37	0.00017778	6.74917e-05	0.000383001	0.000209424
38	0.000197555	6.94201e-05	0.000408952	0.000225309
39	0.000202967	6.77884e-05	0.000413298	0.000228018
40	0.000203524	6.76401e-05	0.00041381	0.000228324
41	0.000199073	6.54151e-05	0.000411636	0.000225375
42	0.000200236	6.55634e-05	0.000411509	0.000225769
43	0.000199882	6.55634e-05	0.000411253	0.000225566
44	0.000195229	6.42284e-05	0.000401537	0.000220332
45	0.000161039	4.95434e-05	0.00034286	0.000184481
46	0.000168575	5.53284e-05	0.000347079	0.000190327
47	0.000170497	5.68117e-05	0.000348868	0.000192059
48	0.000165388	5.19167e-05	0.000344138	0.000187148
49	0.000160887	4.95434e-05	0.000340431	0.00018362
50	0.000164984	5.4735e-05	0.000342476	0.000187398
51	0.000164832	5.4735e-05	0.000340942	0.000186836
52	0.00016463	5.48834e-05	0.000340815	0.000186776
53	0.000164174	5.48834e-05	0.000340048	0.000186368
54	0.000163669	5.48834e-05	0.000338897	0.000185816
55	0.00016382	5.4735e-05	0.000338897	0.000185817
56	0.000158004	5.2065e-05	0.000327903	0.000179324
57	0.000148141	4.82084e-05	0.000313969	0.000170106
58	0.000113597	4.37584e-05	0.000226017	0.000127791
59	0.000113142	4.34617e-05	0.000224866	0.000127156
60	9.87271e-05	4.25717e-05	0.000191117	0.000110805
61	7.76364e-05	4.0495e-05	0.0001667	9.49438e-05
62	7.42477e-05	4.005e-05	0.000158007	9.07683e-05
63	6.97969e-05	3.94567e-05	0.000148675	8.59762e-05
64	6.50932e-05	3.94567e-05	0.000138704	8.10845e-05
65	4.52162e-05	3.48584e-05	9.75399e-05	5.92048e-05
66	4.72393e-05	3.94567e-05	0.00010227	6.29887e-05
67	4.71887e-05	3.9605e-05	0.000102014	6.2936e-05
68	4.63795e-05	3.9605e-05	0.000100992	6.23254e-05
69	3.46961e-05	3.67867e-05	6.2896e-05	4.47929e-05
70	3.25719e-05	3.6045e-05	5.94444e-05	4.26871e-05
71	2.78176e-05	3.35234e-05	5.48423e-05	3.87277e-05
72	1.89665e-05	2.77384e-05	4.02688e-05	2.89912e-05
73	2.36702e-05	2.9815e-05	4.33369e-05	3.2274e-05
74	2.78682e-05	3.08534e-05	4.61493e-05	3.49569e-05
75	2.20012e-05	1.54267e-05	2.9914e-05	2.24473e-05
76	0.000143033	0.000273527	0.000222181	0.000212914
77	0.000147332	0.000284207	0.000226784	0.000219441
78	0.000147534	0.000284504	0.000227295	0.000219778
79	0.000147585	0.000284652	0.000226784	0.000219673
80	0.000147585	0.000285245	0.000225889	0.000219573
81	0.000153452	0.000289844	0.000235093	0.00022613
82	0.000159622	0.000292365	0.000241101	0.00023103
83	0.000168069	0.00029815	0.000263089	0.000243103
84	0.000168423	0.000299485	0.000263856	0.000243922
85	0.000219354	0.000464877	0.000403838	0.00036269
86	0.000233567	0.000494099	0.000438482	0.000388716
87	0.000240395	0.000504927	0.00045638	0.000400567
88	0.000276861	0.000584582	0.000544332	0.000468592
89	0.000280199	0.000590961	0.000550084	0.000473748
90	0.000282627	0.000593186	0.000552513	0.000476109
91	0.00028288	0.000593334	0.000552385	0.0004762
92	0.00029168	0.000607277	0.000568365	0.000489107
93	0.000291731	0.000607129	0.000567087	0.000488649
94	0.000284144	0.000606387	0.000563252	0.000484594
95	0.000262901	0.000603272	0.000538963	0.000468379
96	0.000378522	0.000832299	0.000671146	0.000627322
97	0.000416202	0.000853066	0.000684953	0.000651407
98	0.000418731	0.000855439	0.000685592	0.000653254
99	0.000418983	0.000858109	0.000686743	0.000654612
100	0.000413319	0.000865822	0.000671019	0.000650053
101	0.000904982	0.00189007	0.00124782	0.00134762
102	0.000943825	0.00193575	0.00126367	0.00138108
103	0.000993088	0.00200384	0.00128924	0.00142872
104	0.00125872	0.00239277	0.00155604	0.00173584
105	0.00130166	0.00242599	0.00157266	0.00176677
106	0.00143913	0.00250105	0.00163619	0.00185879
107	0.00145203	0.00250906	0.00163632	0.0018658
108	0.00150063	0.00253383	0.00164744	0.00189397
109	0.00150139	0.00253532	0.00164297	0.00189322
110	0.0015239	0.0025632	0.00164552	0.00191088
111	0.00155015	0.00258071	0.00165191	0.00192759
112	0.00157078	0.00258783	0.00165601	0.0019382
113	0.0015677	0.002581	0.0016468	0.00193183
114	0.00157099	0.00258249	0.00163952	0.001931
115	0.00155652	0.0025727	0.00163057	0.00191993
116	0.00156987	0.00258931	0.00163798	0.00193239
117	0.00155824	0.002577	0.00160883	0.00191469
118	0.00154676	0.00258278	0.00157125	0.00190026
119	0.00156643	0.00259821	0.00158275	0.0019158
120	0.00151434	0.00254407	0.00154018	0.0018662
121	0.00152258	0.00254555	0.00154811	0.00187208
122	0.00146902	0.0025009	0.00151244	0.00182746
123	0.00146745	0.00249794	0.00151692	0.00182744
124	0.00146766	0.00249779	0.00151615	0.0018272
125	0.00144039	0.00247895	0.001481	0.00180011
126	0.00131734	0.00236533	0.00141606	0.00169957
127	0.00124274	0.00229783	0.00138678	0.00164245
128	0.00109743	0.0021185	0.00130675	0.00150756
129	0.00108979	0.00211227	0.0013042	0.00150209
130	0.00105363	0.00206569	0.00128502	0.00146811
131	0.000484329	0.00115314	0.00078978	0.000809084
132	0.000500666	0.00116649	0.000795532	0.000820898
133	0.000501324	0.001157	0.00079093	0.000816418
134	0.000390205	0.000825031	0.000576035	0.00059709
135	0.000247728	0.000389524	0.000394506	0.000343919
136	0.000265683	0.000426162	0.00040256	0.000364802
137	0.00024525	0.000351847	0.000355899	0.000317665
138	0.000245452	0.000351847	0.000355772	0.00031769
139	0.000245048	0.000351402	0.000355644	0.000317364
140	0.000244542	0.000350512	0.000355132	0.000316729
141	0.000232504	0.000333602	0.000348101	0.000304736
142	0.000221883	0.000315357	0.000338897	0.000292046
143	0.00021283	0.000300227	0.000332889	0.000281982
144	0.000207722	0.00029904	0.000328542	0.000278435
145	0.000189311	0.000270115	0.000303997	0.000254475
146	0.000142224	0.00021271	0.000215023	0.000189985
147	0.000154109	0.000221759	0.000224227	0.000200032
148	0.000153148	0.000220127	0.000223204	0.000198826
149	0.000152896	0.000219979	0.000221542	0.000198139
150	0.000139139	0.000196245	0.000184214	0.000173199
151	0.00011997	0.000161832	0.00013538	0.00013906
152	0.000104898	0.000151003	0.000102398	0.000119433
153	0.000100396	0.000147295	9.05089e-05	0.000112733
154	0.000101054	0.000148037	8.51397e-05	0.00011141
155	8.81565e-05	0.00012104	7.22281e-05	9.38082e-05
156	5.66467e-05	6.92717e-05	4.75555e-05	5.78247e-05
157	0.000125938	0.000127567	0.00011646	0.000123321
158	0.000128163	0.000128308	0.000118122	0.000124864
159	0.000126646	0.000125787	0.00011761	0.000123348
160	0.000127657	0.000124897	0.00011646	0.000123005
161	0.000176869	0.000191054	0.000153277	0.000173733
162	0.000179955	0.000192834	0.000154428	0.000175739
163	0.000182585	0.000192834	0.000154172	0.00017653
164	0.000200287	0.000211375	0.000162481	0.000191381
165	0.000202816	0.000211227	0.000163121	0.000192388
166	0.000217938	0.000217457	0.000171941	0.000202445
167	0.000220669	0.00021983	0.000173603	0.000204701
168	0.000221276	0.000220127	0.00017322	0.000204874
169	0.000221276	0.00021983	0.000173092	0.000204733
170	0.000221226	0.000219385	0.000173092	0.000204568
171	0.000220821	0.00021894	0.000172836	0.000204199
172	0.000211313	0.000213007	0.000168618	0.000197646
173	0.000213538	0.000211375	0.000169001	0.000197971
174	0.000210503	0.000208557	0.000167595	0.000195552
175	0.000208682	0.000206925	0.000167723	0.000194443
176	0.000185569	0.000187049	0.000163888	0.000178835
177	0.000191638	0.000188087	0.000169257	0.000182994
178	0.000191233	0.000188087	0.000168618	0.000182646
179	0.000164023	0.000150707	0.000151615	0.000155448
180	0.000183242	0.000156788	0.000170919	0.000170316
181	0.000188097	0.000157678	0.00017322	0.000172999
182	0.000183191	0.000152783	0.000170791	0.000168922
183	0.000182433	0.000150262	0.000173603	0.000168766
184	0.000174897	0.000142103	0.000167723	0.000161574
185	0.000165236	0.000134538	0.000161714	0.00015383
186	0.000164731	0.000133945	0.000161459	0.000153378
187	0.000151985	0.00012549	0.000147141	0.000141539
188	0.000136357	0.000105317	0.000134996	0.000125557
189	0.000113041	8.27701e-05	0.000111346	0.000102386
190	0.000120728	8.66267e-05	0.000112369	0.000106575
191	0.000120071	8.60334e-05	0.000110579	0.000105561
192	0.000118554	8.39567e-05	0.000108406	0.000103639
193	6.95945e-05	4.094e-05	5.30525e-05	5.4529e-05
194	0.000276102	0.000288805	0.000250178	0.000271695
195	0.000279541	0.000292662	0.000254013	0.000275405
196	0.00028116	0.000293255	0.00025478	0.000276398
197	0.000281362	0.000294887	0.000254652	0.000276967
198	0.000281716	0.000295035	0.000255291	0.000277348
199	0.000279845	0.000293404	0.000253885	0.000275711
200	0.00027676	0.000293404	0.000256058	0.000275407
201	0.000271753	0.000296074	0.000259126	0.000275651
202	0.000335328	0.000372169	0.000392717	0.000366738
203	0.000355054	0.000390265	0.000423781	0.0003897
204	0.000355913	0.000390414	0.000423014	0.00038978
205	0.000356419	0.000391155	0.000424037	0.000390537
206	0.000355509	0.00039071	0.00042442	0.000390213
207	0.000344179	0.000384777	0.000408313	0.00037909
208	0.000454995	0.000561294	0.000597384	0.000537891
209	0.000475327	0.000585621	0.000618222	0.000559723
210	0.00047558	0.000593186	0.000622824	0.000563863
211	0.000482357	0.000602382	0.000628577	0.000571105
212	0.000508455	0.000637686	0.000664499	0.000603546
213	0.00045545	0.00055447	0.000632795	0.000547572
214	0.000692759	0.000733509	0.00116524	0.000863835
215	0.000704544	0.000737069	0.00118352	0.000875044
216	0.000706718	0.000738701	0.00118672	0.000877378
217	0.000705403	0.000737662	0.00118761	0.000876892
218	0.000688308	0.000707551	0.00117547	0.000857108
219	0.000677788	0.000693607	0.0011701	0.000847164
220	0.000780562	0.000979149	0.00136287	0.00104086
221	0.000785265	0.000993389	0.00136863	0.00104909
222	0.000793054	0.00100926	0.00137873	0.00106035
223	0.000793206	0.00101119	0.00138013	0.00106151
224	0.000775959	0.000997691	0.00136096	0.00104487
225	0.00077778	0.00100021	0.0013639	0.0010473
226	0.000777476	0.00100184	0.00136441	0.00104791
227	0.00078132	0.00100807	0.00136761	0.00105233
228	0.000756992	0.000999174	0.00133974	0.00103197
229	0.000785518	0.0010502	0.001374	0.0010699
230	0.000790019	0.00107408	0.00138192	0.00108201
231	0.000824766	0.00113282	0.00142206	0.00112655
232	0.000819203	0.00113905	0.00141043	0.0011229
233	0.000810756	0.0011481	0.00138295	0.00111393
234	0.000846666	0.00117569	0.00141414	0.0011455
235	0.000843783	0.0011751	0.00140506	0.00114131
236	0.000777072	0.00112392	0.00129065	0.00106388
237	0.000806204	0.00113876	0.00130087	0.00108194
238	0.000747079	0.00106874	0.00121676	0.00101086
239	0.00087762	0.00111443	0.0012987	0.00109692
240	0.000881008	0.00111458	0.00129934	0.00109831
241	0.000879238	0.00111102	0.00129576	0.00109534
242	0.000879896	0.00111087	0.00129563	0.00109547
243	0.000862193	0.00108788	0.00126572	0.00107193
244	0.000826941	0.00103388	0.00122788	0.00102957
245	0.000811211	0.00100718	0.00121855	0.00101231
246	0.000812931	0.00100837	0.00122583	0.00101571
247	0.000812122	0.00100793	0.00122456	0.00101487
248	0.000804687	0.000998136	0.00121842	0.00100708
249	0.000793813	0.000988939	0.00120231	0.000995021
250	0.000776819	0.000972029	0.00117751	0.000975453
251	0.000773582	0.000969953	0.0011747	0.000972744
252	0.000740757	0.000938209	0.00112049	0.000933154
253	0.000695187	0.000891781	0.00106604	0.000884335
254	0.000689623	0.000886737	0.00105977	0.000878711
255	0.000636922	0.000814796	0.000947914	0.000799877
256	0.000636365	0.000814499	0.000947275	0.00079938
257	0.000612493	0.000776377	0.000901382	0.000763417
258	0.000417062	0.000448264	0.000527841	0.000464389
259	0.000380342	0.000427497	0.000486805	0.000431548
260	0.000266037	0.000248904	0.000311284	0.000275408
261	0.00027064	0.000267594	0.000343243	0.000293826
262	0.000154211	0.000111547	0.000204668	0.000156808
263	0.00020408	0.000187494	0.000304381	0.000231985
264	0.000184355	0.000175627	0.000291341	0.000217108
265	0.000201146	0.000188532	0.000319849	0.000236509
266	0.000199882	0.000189274	0.000319849	0.000236335
267	0.000166248	0.000163167	0.000298117	0.000209177
268	0.000241406	0.00027501	0.000452161	0.000322859
269	0.000249043	0.000279164	0.000458681	0.000328963
270	0.000246464	0.000269967	0.000452544	0.000322992
271	0.000249347	0.000271302	0.000455868	0.000325506
272	0.000248588	0.000271302	0.000455229	0.00032504
273	0.000248487	0.000271302	0.000455101	0.000324963
274	0.000242569	0.000267	0.00044628	0.000318617
275	0.000258501	0.000273675	0.000475939	0.000336038
276	0.000261081	0.000274417	0.000480157	0.000338552
277	0.000260878	0.000273972	0.000479902	0.000338251
278	0.000260878	0.000274417	0.000479902	0.000338399
279	0.00026098	0.000274565	0.000480157	0.000338567
280	0.000260727	0.000274417	0.000479902	0.000338348
281	0.000258805	0.00027412	0.0004753	0.000336075
282	0.000258704	0.00027412	0.000475939	0.000336254
283	0.000254657	0.000272192	0.000473382	0.00033341
284	0.000249195	0.000271005	0.000459703	0.000326635
285	0.000252078	0.000274862	0.00046226	0.000329733
286	0.000252078	0.000274862	0.000461749	0.000329563
287	0.000243733	0.000273824	0.000447175	0.000321577
288	0.000226486	0.000269967	0.000437332	0.000311261
289	0.000228408	0.000284504	0.000455996	0.000322969
290	0.000222692	0.00028747	0.000454973	0.000321712
291	0.000191284	0.000274417	0.000405884	0.000290528
292	0.000279744	0.000730839	0.000637142	0.000549241
293	0.000285864	0.000766587	0.000643278	0.000565243
294	0.000284195	0.000780234	0.000643278	0.000569235
295	0.000223502	0.000724906	0.000551107	0.000499838
296	0.000376195	0.00104308	0.00097476	0.000798012
297	0.000372857	0.00104086	0.000971948	0.00079522
298	0.000398904	0.00105925	0.00104175	0.0008333
299	0.00039238	0.0010551	0.00103676	0.000828079
300	0.000399764	0.00109203	0.00107256	0.000854784
301	0.000771812	0.00190727	0.00232511	0.00166806
302	0.000934722	0.00225675	0.00284502	0.00201216
303	0.000982467	0.00235583	0.00300354	0.00211395
304	0.000995566	0.00238223	0.00303985	0.00213922
305	0.00100427	0.00239128	0.0030534	0.00214965
306	0.000997842	0.00239336	0.00302872	0.00213998
307	0.00104437	0.00247598	0.00313266	0.00221767
308	0.00108565	0.0025454	0.00322342	0.00228482
309	0.00110577	0.0025899	0.0032619	0.00231919
310	0.00121871	0.00279282	0.00356513	0.00252556
311	0.00123242	0.00281255	0.00359121	0.00254539
312	0.00123343	0.0028173	0.00359338	0.00254804
313	0.00122539	0.0028124	0.00359671	0.00254483
314	0.00127925	0.00290748	0.00370396	0.00263023
315	0.00128113	0.00291119	0.00370677	0.00263303
316	0.00128138	0.00291179	0.00370792	0.0026337
317	0.00129397	0.00292588	0.00373439	0.00265141
318	0.00129402	0.00291683	0.00373439	0.00264841
319	0.00129797	0.00291965	0.00373848	0.00265203
320	0.00129817	0.0029198	0.00373873	0.00265223
321	0.00129888	0.00292217	0.00374014	0.00265373
322	0.00129792	0.0029241	0.00374014	0.00265405
323	0.0012436	0.00275678	0.00365065	0.00255034
324	0.00127501	0.00280291	0.00369591	0.00259127
325	0.00127637	0.00280691	0.00369719	0.00259349
326	0.00127516	0.00279668	0.00369003	0.00258729
327	0.00127526	0.00279698	0.00368683	0.00258635
328	0.00127556	0.00279831	0.00368683	0.0025869
329	0.00126352	0.002759	0.00366305	0.00256186
330	0.00126661	0.00276167	0.00366433	0.0025642
331	0.00123141	0.00265383	0.00359172	0.00249232
332	0.00123262	0.00265027	0.00359019	0.00249103
333	0.00113122	0.00237986	0.00339357	0.00230155
334	0.00113248	0.00237942	0.00339242	0.00230144
335	0.00113152	0.00237957	0.0033813	0.00229746
336	0.00113	0.00237867	0.00336839	0.00229235
337	0.00108104	0.00233521	0.00316449	0.00219358
338	0.00108008	0.00233477	0.00314825	0.0021877
339	0.00107983	0.00233566	0.00314493	0.0021868
340	0.00107077	0.00233269	0.00309967	0.00216771
341	0.00102981	0.00230629	0.00295228	0.00209612
342	0.00102404	0.00230525	0.00292709	0.00208546
343	0.000936138	0.00219845	0.00264892	0.00192784
344	0.000911051	0.00211538	0.00250868	0.00184504
345	0.000910596	0.00211568	0.00250689	0.00184439
346	0.00083215	0.00190386	0.00221465	0.00165022
347	0.000831291	0.00190178	0.00221056	0.00164788
348	0.000806761	0.00184838	0.00212325	0.0015928
349	0.000628981	0.00127315	0.00145773	0.00111995
350	0.000625339	0.00126069	0.00144674	0.00111092
351	0.000528332	0.00102306	0.00115821	0.000903198
352	0.000429504	0.000800259	0.000898314	0.000709359
353	0.000425154	0.000795067	0.000887064	0.000702428
354	0.000408615	0.000767626	0.000857789	0.00067801
355	7.39948e-05	0.000155305	0.000132567	0.000120622
356	8.09239e-05	0.000160793	0.0001419	0.000127872
357	7.42477e-05	0.000152783	0.000128732	0.000118588
358	2.97901e-05	6.91234e-05	4.57658e-05	4.82264e-05
359	4.21816e-05	6.67501e-05	6.51971e-05	5.80429e-05
360	4.27379e-05	6.76401e-05	6.60919e-05	5.88233e-05
361	4.27885e-05	6.74917e-05	6.60919e-05	5.87907e-05
362	3.9855e-05	6.36351e-05	6.14898e-05	5.49933e-05
363	4.15241e-05	6.37834e-05	6.71146e-05	5.7474e-05
364	4.15746e-05	6.37834e-05	6.72425e-05	5.75335e-05
365	4.15746e-05	6.37834e-05	6.72425e-05	5.75335e-05
366	4.16252e-05	6.37834e-05	6.73703e-05	5.7593e-05
367	4.09677e-05	6.20034e-05	6.67311e-05	5.65674e-05
368	4.09171e-05	6.20034e-05	6.6859e-05	5.65932e-05
369	4.07148e-05	6.20034e-05	6.6859e-05	5.65257e-05
370	4.04114e-05	6.18551e-05	6.66033e-05	5.62899e-05
371	4.03102e-05	6.17067e-05	6.66033e-05	5.62067e-05
372	3.82871e-05	5.90367e-05	6.39187e-05	5.37475e-05
373	2.95878e-05	3.5155e-05	5.15185e-05	3.87538e-05
374	3.6264e-05	3.58967e-05	6.26403e-05	4.49337e-05
375	3.64663e-05	3.58967e-05	6.30238e-05	4.5129e-05
376	3.73767e-05	3.58967e-05	6.49414e-05	4.60716e-05
377	3.1358e-05	2.5365e-05	6.34074e-05	4.00435e-05
378	6.66105e-05	3.54517e-05	0.000123874	7.53122e-05
379	6.99486e-05	3.63417e-05	0.000131417	7.92357e-05
380	6.97463e-05	3.6045e-05	0.00013359	7.97938e-05
381	6.89876e-05	3.41167e-05	0.000134613	7.9239e-05
382	7.91031e-05	3.6935e-05	0.000160052	9.20302e-05
383	8.08733e-05	3.738e-05	0.000167084	9.51123e-05
384	8.1632e-05	3.79734e-05	0.00016849	9.60317e-05
385	8.20872e-05	3.79734e-05	0.000169129	9.63965e-05
386	8.20872e-05	3.75284e-05	0.000169768	9.64612e-05
387	8.17331e-05	3.67867e-05	0.000169129	9.58829e-05
388	8.10756e-05	3.63417e-05	0.000168618	9.5345e-05
389	8.02664e-05	3.6045e-05	0.000167467	9.45928e-05
390	8.04687e-05	3.57484e-05	0.000167339	9.45187e-05
391	7.96089e-05	3.45617e-05	0.000165166	9.31122e-05
392	7.73329e-05	3.04084e-05	0.000159669	8.91367e-05
393	7.71812e-05	2.83317e-05	0.000154683	8.6732e-05
394	8.4262e-05	3.45617e-05	0.000160052	9.29587e-05
395	8.98255e-05	4.06434e-05	0.000163504	9.7991e-05
396	9.20509e-05	4.16817e-05	0.000163376	9.90363e-05
397	7.58156e-05	4.005e-05	0.000149825	8.85637e-05
398	7.79904e-05	4.06434e-05	0.000149953	8.9529e-05
399	7.79398e-05	4.06434e-05	0.00014957	8.93843e-05
400	7.79398e-05	4.06434e-05	0.00014957	8.93843e-05
401	7.75858e-05	4.06434e-05	0.000149442	8.92237e-05
402	7.445e-05	3.99017e-05	0.000145095	8.64824e-05
403	6.68634e-05	3.79734e-05	0.000138192	8.10097e-05
404	6.69645e-05	3.79734e-05	0.000138064	8.10008e-05
405	6.69645e-05	3.79734e-05	0.000137937	8.09582e-05
406	6.69139e-05	3.79734e-05	0.000137937	8.09413e-05
407	6.66105e-05	3.79734e-05	0.000137297	8.06271e-05
408	6.65093e-05	3.79734e-05	0.000136658	8.03803e-05
409	6.63576e-05	3.79734e-05	0.000136019	8.01167e-05
410	6.63576e-05	3.79734e-05	0.000136019	8.01167e-05
411	6.47897e-05	3.61934e-05	0.000131417	7.74666e-05
412	6.47897e-05	3.61934e-05	0.000131417	7.74666e-05
413	6.19068e-05	3.56e-05	0.000123747	7.37511e-05
414	6.12493e-05	3.5155e-05	0.000122724	7.30427e-05
415	5.88721e-05	3.08534e-05	0.000117866	6.91972e-05
416	5.71525e-05	2.96667e-05	0.000114031	6.69501e-05
417	5.20948e-06	3.41167e-06	8.56511e-06	5.72875e-06
418	5.36121e-06	3.115e-06	8.43727e-06	5.63783e-06
419	5.20948e-06	3.115e-06	8.18159e-06	5.50202e-06
420	3.591e-06	1.78e-06	3.70729e-06	3.02609e-06
421	3.84388e-06	1.92834e-06	3.70729e-06	3.15983e-06
422	2.07367e-06	1.63167e-06	2.81242e-06	2.17259e-06
423	2.47829e-06	2.96667e-06	3.45161e-06	2.96552e-06
424	2.47829e-06	2.96667e-06	3.45161e-06	2.96552e-06
425	2.22541e-06	2.96667e-06	2.94026e-06	2.71078e-06
426	2.27598e-06	2.81834e-06	2.68459e-06	2.59297e-06
427	1.97252e-06	2.52167e-06	2.42891e-06	2.3077e-06
428	3.79331e-06	4.45e-06	3.96296e-06	4.06876e-06
429	3.79331e-06	4.59834e-06	3.96296e-06	4.1182e-06
430	4.50139e-06	5.04334e-06	4.47431e-06	4.67301e-06
431	4.50139e-06	5.19167e-06	4.47431e-06	4.72246e-06
432	4.2485e-06	4.45e-06	4.0908e-06	4.2631e-06
433	7.23257e-06	6.23001e-06	6.64755e-06	6.70337e-06
434	7.28315e-06	6.37834e-06	6.51971e-06	6.72707e-06
435	1.65388e-05	1.068e-05	8.82078e-06	1.20132e-05
436	1.66906e-05	1.068e-05	8.56511e-06	1.19786e-05
437	4.54691e-05	2.92217e-05	1.63632e-05	3.03513e-05
438	5.08303e-05	3.14467e-05	1.73859e-05	3.3221e-05
439	5.14372e-05	3.2485e-05	1.73859e-05	3.37694e-05
440	0.000104898	8.63301e-05	4.42317e-05	7.84865e-05
441	0.000109551	8.76651e-05	4.55101e-05	8.09086e-05
442	0.000127961	8.97417e-05	5.3436e-05	9.03796e-05
443	0.000129276	9.01867e-05	5.36917e-05	9.10515e-05
444	0.000129377	9.03351e-05	5.36917e-05	9.11346e-05
445	0.000129377	9.03351e-05	5.36917e-05	9.11346e-05
446	0.000146068	9.98284e-05	6.05949e-05	0.000102164
447	0.000146675	0.000100422	6.05949e-05	0.000102564
448	0.000146776	0.000100422	6.05949e-05	0.000102597
449	0.000146624	0.00010057	6.09784e-05	0.000102724
450	0.000178994	0.000134687	7.12054e-05	0.000128295
451	0.000180258	0.000135132	7.13333e-05	0.000128908
452	0.000181067	0.000135132	7.14611e-05	0.00012922
453	0.000181168	0.000135132	7.17168e-05	0.000129339
454	0.000181826	0.000135428	7.21003e-05	0.000129785
455	0.000181725	0.00013528	7.21003e-05	0.000129702
456	0.000174037	0.000133945	7.03106e-05	0.000126098
457	0.000153755	0.000128012	6.72425e-05	0.000116337
458	0.000168322	0.000143735	8.01541e-05	0.000130737
459	0.00016817	0.00014418	8.02819e-05	0.000130877
460	0.000167664	0.000144328	8.05376e-05	0.000130843
461	0.000166147	0.000143883	8.01541e-05	0.000130061
462	0.000138683	0.000125787	6.82652e-05	0.000110912
463	0.000145005	0.000130682	7.35065e-05	0.000116398
464	0.000145511	0.000131423	7.389e-05	0.000116942
465	0.000143893	0.000129643	7.32508e-05	0.000115596
466	0.000134587	0.000122672	7.00549e-05	0.000109104
467	0.00012614	0.00011659	6.77538e-05	0.000103495
468	0.000126292	0.00011837	6.82652e-05	0.000104309
469	9.02301e-05	7.46117e-05	5.57371e-05	7.35263e-05
470	9.54396e-05	8.02484e-05	5.82939e-05	7.7994e-05
471	9.5389e-05	8.02484e-05	5.84217e-05	7.80197e-05
472	9.18992e-05	7.74301e-05	5.75268e-05	7.56187e-05
473	5.44213e-05	4.3165e-05	4.3209e-05	4.69318e-05
474	6.85324e-05	5.78501e-05	4.98566e-05	5.87464e-05
475	6.8583e-05	5.82951e-05	5.01123e-05	5.89968e-05
476	6.54978e-05	5.5625e-05	4.99844e-05	5.70358e-05
477	6.4638e-05	5.45867e-05	4.97288e-05	5.63178e-05
478	6.4638e-05	5.44384e-05	5.03679e-05	5.64814e-05
479	6.42333e-05	5.39934e-05	5.04958e-05	5.62408e-05
480	6.43345e-05	5.39934e-05	5.04958e-05	5.62746e-05
481	6.42333e-05	5.39934e-05	4.99844e-05	5.60704e-05
482	6.12998e-05	5.251e-05	4.96009e-05	5.44703e-05
483	6.01871e-05	5.26584e-05	4.78112e-05	5.35522e-05
484	5.84675e-05	5.251e-05	4.60215e-05	5.2333e-05
485	5.59386e-05	5.0285e-05	4.28255e-05	4.96831e-05
486	5.14372e-05	4.628e-05	3.74564e-05	4.50579e-05
487	3.42915e-05	3.10017e-05	2.45448e-05	2.9946e-05
488	4.31931e-05	4.42034e-05	2.54396e-05	3.7612e-05
489	4.3092e-05	4.4055e-05	2.48005e-05	3.73158e-05
490	4.41541e-05	4.47967e-05	2.49283e-05	3.79597e-05
491	4.39518e-05	4.46484e-05	2.49283e-05	3.78428e-05
492	4.35977e-05	4.39067e-05	2.46726e-05	3.73924e-05
493	2.24564e-05	2.52167e-05	1.34229e-05	2.03653e-05
494	2.32656e-05	2.56617e-05	1.39343e-05	2.09539e-05
495	2.31139e-05	2.55134e-05	1.36786e-05	2.07686e-05
496	2.09896e-05	2.43267e-05	1.31673e-05	1.94945e-05
497	3.15097e-05	3.53034e-05	1.75137e-05	2.81089e-05
498	3.16615e-05	3.56e-05	1.76416e-05	2.8301e-05
499	3.2319e-05	3.6045e-05	1.82808e-05	2.88816e-05
500	3.2319e-05	3.61934e-05	1.81529e-05	2.88884e-05
501	3.22684e-05	3.61934e-05	1.81529e-05	2.88716e-05
502	3.22684e-05	3.61934e-05	1.81529e-05	2.88716e-05
503	3.20155e-05	3.61934e-05	1.76416e-05	2.86168e-05
504	3.17626e-05	3.61934e-05	1.6491e-05	2.8149e-05
505	3.17626e-05	3.61934e-05	1.54683e-05	2.78081e-05
506	2.70589e-05	3.35234e-05	1.11219e-05	2.39014e-05
507	2.83234e-05	3.41167e-05	1.12497e-05	2.45633e-05
508	2.82222e-05	3.39684e-05	1.11219e-05	2.44375e-05
509	2.79693e-05	3.35234e-05	1.11219e-05	2.42048e-05
510	1.78538e-05	1.98767e-05	6.90322e-06	1.48779e-05
511	1.93712e-05	2.10634e-05	7.41457e-06	1.59497e-05
512	1.927e-05	2.12117e-05	7.41457e-06	1.59654e-05
513	1.93206e-05	2.0915e-05	7.41457e-06	1.58834e-05
514	1.73481e-05	1.94317e-05	7.1589e-06	1.46462e-05
515	1.927e-05	2.047e-05	7.79808e-06	1.5846e-05
516	1.88148e-05	2.03217e-05	7.79808e-06	1.56449e-05
517	1.86125e-05	1.958e-05	7.92592e-06	1.53728e-05
518	1.87642e-05	1.958e-05	7.79808e-06	1.53808e-05
519	1.86125e-05	1.958e-05	7.79808e-06	1.53302e-05
520	1.86125e-05	1.97284e-05	7.79808e-06	1.53796e-05
521	1.85619e-05	1.97284e-05	7.79808e-06	1.53628e-05
522	1.4718e-05	1.513e-05	6.64755e-06	1.21652e-05
523	1.51227e-05	1.57233e-05	6.77538e-06	1.25405e-05
524	1.50721e-05	1.57233e-05	6.77538e-06	1.25236e-05
525	1.40099e-05	1.52783e-05	6.64755e-06	1.19786e-05
526	8.90163e-06	8.75167e-06	3.83512e-06	7.16281e-06
527	8.80047e-06	9.64168e-06	3.70729e-06	7.38314e-06
528	5.96814e-06	6.52667e-06	2.17324e-06	4.88935e-06
529	7.89008e-06	1.26083e-05	2.94026e-06	7.81289e-06
530	8.04181e-06	1.27567e-05	2.94026e-06	7.91292e-06
531	7.68777e-06	1.26083e-05	2.68459e-06	7.66023e-06
532	7.58661e-06	1.3795e-05	2.42891e-06	7.93685e-06
533	9.71087e-06	1.63167e-05	3.45161e-06	9.82639e-06
534	9.71087e-06	1.63167e-05	3.32377e-06	9.78377e-06
535	9.76144e-06	1.58717e-05	3.32377e-06	9.6523e-06
536	9.96375e-06	1.602e-05	3.19594e-06	9.72657e-06
537	1.10259e-05	1.7355e-05	3.45161e-06	1.06108e-05
538	1.12788e-05	1.76517e-05	3.45161e-06	1.0794e-05
539	1.1127e-05	1.72067e-05	3.45161e-06	1.05951e-05
540	1.08741e-05	1.691e-05	3.57945e-06	1.04545e-05
541	2.12425e-05	3.04084e-05	4.85782e-06	1.88362e-05
542	2.1546e-05	3.05567e-05	4.98566e-06	1.90294e-05
543	2.15966e-05	3.10017e-05	4.98566e-06	1.91946e-05
544	2.13437e-05	3.05567e-05	4.72998e-06	1.88768e-05
545	4.14229e-05	5.17684e-05	9.33213e-06	3.41745e-05
546	4.18781e-05	5.19167e-05	9.33213e-06	3.43757e-05
547	4.19287e-05	5.19167e-05	9.33213e-06	3.43925e-05
548	4.19793e-05	5.19167e-05	9.33213e-06	3.44094e-05
549	4.18275e-05	5.19167e-05	9.33213e-06	3.43588e-05
550	4.16252e-05	5.1175e-05	9.20429e-06	3.40015e-05
551	4.24345e-05	5.23617e-05	9.20429e-06	3.46668e-05
552	4.24345e-05	5.23617e-05	9.20429e-06	3.46668e-05
553	4.20804e-05	5.23617e-05	9.20429e-06	3.45488e-05
554	4.20804e-05	5.23617e-05	9.20429e-06	3.45488e-05
555	4.20804e-05	5.2065e-05	9.20429e-06	3.44499e-05
556	4.20298e-05	5.2065e-05	9.20429e-06	3.44331e-05
557	4.19793e-05	5.19167e-05	9.20429e-06	3.43668e-05
558	4.0816e-05	5.04334e-05	8.82078e-06	3.33567e-05
559	4.00067e-05	4.99884e-05	8.18159e-06	3.27256e-05
560	3.29259e-05	4.2275e-05	7.54241e-06	2.75811e-05
561	3.29765e-05	4.2275e-05	7.54241e-06	2.7598e-05
562	3.28753e-05	4.2275e-05	7.54241e-06	2.75643e-05
563	3.2673e-05	4.19784e-05	7.41457e-06	2.73553e-05
564	2.94866e-05	3.8715e-05	7.03106e-06	2.50776e-05
565	1.45663e-05	1.424e-05	3.45161e-06	1.07526e-05
566	1.43134e-05	1.424e-05	3.45161e-06	1.06683e-05
567	1.22397e-05	1.26083e-05	3.0681e-06	9.30539e-06
568	2.93349e-06	4.005e-06	3.83512e-07	2.44067e-06
569	2.98407e-06	3.85667e-06	3.83512e-07	2.40808e-06
570	7.58661e-07	1.63167e-06	1.27837e-07	8.39389e-07
571	1.21386e-06	1.63167e-06	1.27837e-07	9.91121e-07
572	1.01155e-06	1.03833e-06	1.27837e-07	7.25907e-07
573	1.61848e-06	1.18667e-06	1.27837e-06	1.36117e-06
574	1.77021e-06	1.48333e-06	1.27837e-06	1.51064e-06
575	1.61848e-06	1.48333e-06	1.27837e-06	1.46006e-06
576	2.22541e-06	1.63167e-06	1.66189e-06	1.83965e-06
577	2.17483e-06	1.48333e-06	1.66189e-06	1.77335e-06
578	4.50139e-06	2.81834e-06	3.19594e-06	3.50522e-06
579	4.90601e-06	2.81834e-06	3.19594e-06	3.64009e-06
580	5.00717e-06	2.81834e-06	3.32377e-06	3.71642e-06
581	1.51732e-05	1.12733e-05	7.79808e-06	1.14149e-05
582	1.52238e-05	1.12733e-05	7.92592e-06	1.14744e-05
583	1.52744e-05	1.09767e-05	8.05376e-06	1.14349e-05
584	2.11414e-05	1.39433e-05	1.36786e-05	1.62544e-05
585	2.11919e-05	1.39433e-05	1.38064e-05	1.63139e-05
586	2.12931e-05	1.39433e-05	1.44456e-05	1.65607e-05
587	2.17483e-05	1.39433e-05	1.45735e-05	1.6755e-05
588	2.22035e-05	1.40917e-05	1.48291e-05	1.70414e-05
589	2.23552e-05	1.40917e-05	1.50848e-05	1.71772e-05
590	2.26587e-05	1.43883e-05	1.52127e-05	1.74199e-05
591	2.28104e-05	1.424e-05	1.52127e-05	1.7421e-05
592	4.25356e-05	2.29917e-05	3.28542e-05	3.27938e-05
593	4.51151e-05	2.403e-05	3.47718e-05	3.4639e-05
594	4.89084e-05	2.55134e-05	3.83512e-05	3.7591e-05
595	5.85687e-05	2.74417e-05	4.92174e-05	4.50759e-05
596	6.044e-05	2.81834e-05	5.07515e-05	4.64583e-05
597	6.5346e-05	2.90734e-05	5.80382e-05	5.08192e-05
598	6.48403e-05	2.90734e-05	5.75268e-05	5.04802e-05
599	6.5346e-05	2.90734e-05	5.79103e-05	5.07766e-05
600	6.11481e-05	2.59584e-05	5.6632e-05	4.79128e-05
601	6.28677e-05	2.759e-05	5.70155e-05	4.91578e-05
602	6.26149e-05	2.68484e-05	5.70155e-05	4.88262e-05
603	5.95802e-05	2.69967e-05	5.5865e-05	4.74806e-05
604	7.54615e-05	3.1595e-05	5.93166e-05	5.54577e-05
605	7.60179e-05	3.1595e-05	5.95722e-05	5.57284e-05
606	7.5411e-05	3.12984e-05	5.93166e-05	5.5342e-05
607	7.52086e-05	3.12984e-05	5.93166e-05	5.52745e-05
608	7.47534e-05	3.10017e-05	5.94444e-05	5.50665e-05
609	7.45511e-05	3.10017e-05	5.94444e-05	5.49991e-05
610	6.88865e-05	2.87767e-05	5.56093e-05	5.10908e-05
611	7.64225e-05	3.4265e-05	5.8933e-05	5.65402e-05
612	7.62708e-05	3.41167e-05	5.91887e-05	5.65254e-05
613	7.62202e-05	3.53034e-05	5.94444e-05	5.69893e-05
614	7.54615e-05	3.471e-05	5.94444e-05	5.65387e-05
615	7.51581e-05	3.54517e-05	5.94444e-05	5.66847e-05
616	4.96165e-05	2.759e-05	4.93452e-05	4.21839e-05
617	6.4638e-05	4.5835e-05	5.62485e-05	5.55738e-05
618	6.55484e-05	4.717e-05	5.6632e-05	5.64501e-05
619	6.45368e-05	4.70217e-05	5.54814e-05	5.568e-05
620	6.4638e-05	4.70217e-05	5.54814e-05	5.57137e-05
621	6.34747e-05	4.6725e-05	5.38196e-05	5.46731e-05
622	6.34241e-05	4.65767e-05	5.25412e-05	5.41807e-05
623	4.39518e-05	4.272e-05	2.65902e-05	3.7754e-05
624	4.6076e-05	4.55384e-05	2.77407e-05	3.9785e-05
625	4.50139e-05	4.46484e-05	2.71015e-05	3.89213e-05
626	4.27379e-05	4.43517e-05	2.56953e-05	3.7595e-05
627	5.85687e-05	7.17934e-05	3.43883e-05	5.49168e-05
628	5.88721e-05	7.20901e-05	3.45161e-05	5.51594e-05
629	5.88721e-05	7.22384e-05	3.46439e-05	5.52515e-05
630	5.85687e-05	7.20901e-05	3.43883e-05	5.50157e-05
631	5.68996e-05	7.13484e-05	3.23429e-05	5.35303e-05
632	5.68996e-05	7.13484e-05	3.23429e-05	5.35303e-05
633	5.65456e-05	7.12001e-05	3.19594e-05	5.3235e-05
634	5.24994e-05	7.07551e-05	2.79964e-05	5.04169e-05
635	5.30557e-05	7.13484e-05	2.72294e-05	5.05445e-05
636	5.07797e-05	7.01617e-05	2.60788e-05	4.90068e-05
637	4.11195e-05	6.24484e-05	2.1988e-05	4.1852e-05
638	5.66467e-05	8.14351e-05	2.5951e-05	5.46776e-05
639	5.73548e-05	8.18801e-05	2.5951e-05	5.5062e-05
640	6.05918e-05	8.58851e-05	2.62067e-05	5.75612e-05
641	5.45225e-05	8.12867e-05	2.39056e-05	5.32383e-05
642	5.94791e-05	8.03967e-05	2.54396e-05	5.51051e-05
643	6.01871e-05	8.03967e-05	2.54396e-05	5.53412e-05
644	5.99343e-05	8.02484e-05	2.41613e-05	5.47813e-05
645	5.97319e-05	8.02484e-05	2.41613e-05	5.47139e-05
646	4.68347e-05	6.51184e-05	2.01983e-05	4.40505e-05
647	4.85038e-05	6.51184e-05	2.0454e-05	4.4692e-05
648	4.86049e-05	6.49701e-05	2.0454e-05	4.46763e-05
649	4.87061e-05	6.49701e-05	2.0454e-05	4.471e-05
650	4.87061e-05	6.49701e-05	2.0454e-05	4.471e-05
651	4.87061e-05	6.48217e-05	2.0454e-05	4.46606e-05
652	4.7998e-05	6.36351e-05	2.01983e-05	4.39438e-05
653	4.7998e-05	6.36351e-05	2.01983e-05	4.39438e-05
654	4.67335e-05	6.15584e-05	1.93034e-05	4.25318e-05
655	4.66324e-05	6.15584e-05	1.93034e-05	4.24981e-05
656	4.64807e-05	6.09651e-05	1.93034e-05	4.22497e-05
657	3.18638e-05	4.30167e-05	1.18889e-05	2.89231e-05
658	3.15097e-05	4.28684e-05	1.20167e-05	2.87983e-05
659	3.10545e-05	4.19784e-05	1.1761e-05	2.82647e-05
660	3.01441e-05	4.01984e-05	1.16332e-05	2.73252e-05
661	2.82728e-05	3.9605e-05	1.16332e-05	2.65037e-05
662	4.85543e-06	6.97167e-06	3.0681e-06	4.96507e-06
663	9.81202e-06	7.12001e-06	5.88052e-06	7.60418e-06
664	1.14305e-05	7.26834e-06	6.51971e-06	8.40618e-06
665	1.18351e-05	7.26834e-06	6.51971e-06	8.54106e-06
666	1.18351e-05	7.41667e-06	6.51971e-06	8.5905e-06
667	1.16328e-05	7.26834e-06	6.51971e-06	8.47362e-06
668	1.05707e-05	5.34e-06	5.75268e-06	7.22112e-06
669	1.12788e-05	5.19167e-06	6.26403e-06	7.57816e-06
670	1.13293e-05	5.19167e-06	6.26403e-06	7.59502e-06
671	1.13293e-05	5.19167e-06	6.26403e-06	7.59502e-06
672	1.13293e-05	5.19167e-06	6.26403e-06	7.59502e-06
673	1.13293e-05	5.19167e-06	6.26403e-06	7.59502e-06
674	1.13293e-05	5.19167e-06	6.00836e-06	7.50979e-06
675	1.10765e-05	5.04334e-06	5.88052e-06	7.33344e-06
676	1.09753e-05	4.895e-06	5.88052e-06	7.25028e-06
677	1.09753e-05	4.74667e-06	5.88052e-06	7.20083e-06
678	1.08236e-05	4.74667e-06	5.88052e-06	7.15025e-06
679	9.81202e-06	2.81834e-06	4.85782e-06	5.82939e-06
680	9.8626e-06	2.81834e-06	4.85782e-06	5.84625e-06
681	9.60971e-06	1.92834e-06	4.47431e-06	5.33745e-06
682	9.8626e-06	1.92834e-06	4.72998e-06	5.50697e-06
683	9.66029e-06	1.92834e-06	4.72998e-06	5.43954e-06
684	6.11987e-06	1.03833e-06	4.0908e-06	3.74967e-06
685	6.47391e-06	1.335e-06	4.0908e-06	3.96657e-06
686	6.52449e-06	1.335e-06	4.0908e-06	3.98343e-06
687	6.32218e-06	1.335e-06	4.0908e-06	3.91599e-06
688	3.84388e-06	8.90001e-07	2.68459e-06	2.47282e-06
689	4.19793e-06	8.90001e-07	3.0681e-06	2.71868e-06
690	4.2485e-06	8.90001e-07	3.0681e-06	2.73553e-06
691	3.69215e-06	7.41667e-07	2.55675e-06	2.33019e-06
692	4.50139e-06	7.41667e-07	2.68459e-06	2.64255e-06
693	4.50139e-06	7.41667e-07	2.68459e-06	2.64255e-06
694	4.34966e-06	7.41667e-07	2.55675e-06	2.54936e-06
695	3.84388e-06	7.41667e-07	2.55675e-06	2.38077e-06
696	3.84388e-06	5.93334e-07	2.68459e-06	2.37393e-06
697	3.84388e-06	5.93334e-07	2.68459e-06	2.37393e-06
698	2.78176e-06	5.93334e-07	1.27837e-06	1.55116e-06
699	3.43927e-06	5.93334e-07	1.40621e-06	1.81294e-06
700	3.38869e-06	5.93334e-07	1.27837e-06	1.75347e-06
701	5.76583e-06	7.41667e-07	2.30107e-06	2.93619e-06
702	5.86698e-06	7.41667e-07	2.42891e-06	3.01252e-06
703	5.86698e-06	7.41667e-07	2.42891e-06	3.01252e-06
704	5.86698e-06	7.41667e-07	2.42891e-06	3.01252e-06
705	5.8164e-06	5.93334e-07	2.42891e-06	2.94622e-06
706	5.8164e-06	5.93334e-07	2.42891e-06	2.94622e-06
707	5.36121e-06	1.48333e-07	2.0454e-06	2.51831e-06
708	9.4074e-06	7.41667e-07	2.55675e-06	4.23527e-06
709	9.35682e-06	7.41667e-07	2.55675e-06	4.21841e-06
710	9.10394e-06	7.41667e-07	2.55675e-06	4.13412e-06
711	1.28467e-05	1.48333e-06	3.83512e-06	6.05504e-06
712	1.28467e-05	1.48333e-06	3.83512e-06	6.05504e-06
713	1.28467e-05	1.48333e-06	3.83512e-06	6.05504e-06
714	1.25432e-05	1.48333e-06	3.83512e-06	5.95389e-06
715	1.40099e-05	1.78e-06	6.26403e-06	7.35133e-06
716	1.40605e-05	1.78e-06	6.26403e-06	7.36819e-06
717	1.41111e-05	1.78e-06	6.39187e-06	7.42766e-06
718	1.40099e-05	1.78e-06	6.39187e-06	7.39394e-06
719	1.37065e-05	1.78e-06	6.39187e-06	7.29279e-06
720	1.67917e-05	3.115e-06	8.30943e-06	9.40538e-06
721	1.68929e-05	3.26334e-06	8.30943e-06	9.48854e-06
722	1.6994e-05	3.41167e-06	8.30943e-06	9.57171e-06
723	1.69434e-05	3.41167e-06	8.30943e-06	9.55485e-06
724	1.66906e-05	3.26334e-06	8.18159e-06	9.37849e-06
725	1.64882e-05	3.26334e-06	8.18159e-06	9.31106e-06
726	1.5325e-05	3.26334e-06	7.67024e-06	8.75285e-06
727	1.52238e-05	3.26334e-06	7.67024e-06	8.71913e-06
728	1.42628e-05	3.26334e-06	7.67024e-06	8.39881e-06
729	1.35548e-05	3.26334e-06	7.67024e-06	8.16278e-06
730	9.50856e-06	2.96667e-06	6.77538e-06	6.41687e-06
731	9.50856e-06	2.96667e-06	6.77538e-06	6.41687e-06
732	8.09239e-06	2.225e-06	6.51971e-06	5.61237e-06
733	8.09239e-06	2.225e-06	6.51971e-06	5.61237e-06
734	7.48546e-06	2.225e-06	6.26403e-06	5.32483e-06
735	7.43488e-06	2.225e-06	6.39187e-06	5.35059e-06
736	7.38431e-06	2.225e-06	6.39187e-06	5.33373e-06
737	7.08084e-06	2.225e-06	5.88052e-06	5.06212e-06
738	7.03026e-06	2.225e-06	5.88052e-06	5.04526e-06
739	6.97969e-06	2.225e-06	5.88052e-06	5.0284e-06
740	6.77738e-06	2.225e-06	5.88052e-06	4.96097e-06
741	6.42333e-06	2.225e-06	5.88052e-06	4.84295e-06
742	6.06929e-06	2.225e-06	5.88052e-06	4.72494e-06
743	5.86698e-06	2.07667e-06	5.88052e-06	4.60806e-06
744	5.61409e-06	2.07667e-06	5.88052e-06	4.52376e-06
745	5.56352e-06	2.07667e-06	5.88052e-06	4.5069e-06
746	4.04619e-06	1.92834e-06	5.49701e-06	3.82385e-06
747	1.66906e-06	1.03833e-06	4.98566e-06	2.56435e-06
748	2.22541e-06	1.03833e-06	4.98566e-06	2.7498e-06
749	2.22541e-06	1.03833e-06	4.98566e-06	2.7498e-06
750	2.47829e-06	1.03833e-06	5.24133e-06	2.91932e-06
751	2.42772e-06	8.90001e-07	4.85782e-06	2.72518e-06
752	2.37714e-06	8.90001e-07	4.72998e-06	2.66571e-06
753	2.37714e-06	8.90001e-07	4.72998e-06	2.66571e-06
754	2.37714e-06	8.90001e-07	4.72998e-06	2.66571e-06
755	2.07367e-06	7.41667e-07	4.0908e-06	2.30205e-06
756	2.0231e-06	7.41667e-07	4.0908e-06	2.28519e-06
757	2.0231e-06	7.41667e-07	3.83512e-06	2.19996e-06
758	2.0231e-06	7.41667e-07	3.83512e-06	2.19996e-06
759	1.51732e-06	5.93334e-07	2.30107e-06	1.47058e-06
760	1.51732e-06	4.45e-07	2.30107e-06	1.42113e-06
761	1.51732e-06	4.45e-07	2.30107e-06	1.42113e-06
762	1.51732e-06	4.45e-07	2.30107e-06	1.42113e-06
763	1.41617e-06	2.96667e-07	1.91756e-06	1.21013e-06
764	1.41617e-06	1.48333e-07	1.91756e-06	1.16069e-06
765	1.31501e-06	1.48333e-07	1.78972e-06	1.08436e-06
766	1.31501e-06	1.48333e-07	1.78972e-06	1.08436e-06
767	1.26444e-06	1.48333e-07	1.66189e-06	1.02489e-06
768	1.31501e-06	1.48333e-07	1.66189e-06	1.04174e-06
769	1.31501e-06	2.96667e-07	1.66189e-06	1.09119e-06
770	1.26444e-06	2.96667e-07	1.53405e-06	1.03172e-06
771	1.31501e-06	2.96667e-07	1.53405e-06	1.04858e-06
772	1.31501e-06	2.96667e-07	1.15054e-06	9.20739e-07
773	1.16328e-06	2.96667e-07	8.94862e-07	7.84937e-07
774	1.1127e-06	5.93334e-07	6.39187e-07	7.81741e-07
775	1.51732e-06	1.03833e-06	8.94862e-07	1.15017e-06
776	1.51732e-06	1.03833e-06	8.94862e-07	1.15017e-06
777	1.51732e-06	1.03833e-06	1.0227e-06	1.19279e-06
778	1.5679e-06	1.03833e-06	1.0227e-06	1.20964e-06
779	1.5679e-06	1.03833e-06	1.0227e-06	1.20964e-06
780	1.5679e-06	1.03833e-06	1.0227e-06	1.20964e-06
781	2.17483e-06	1.48333e-06	1.53405e-06	1.73074e-06
782	2.17483e-06	1.48333e-06	1.53405e-06	1.73074e-06
783	2.42772e-06	1.78e-06	2.17324e-06	2.12698e-06
784	2.47829e-06	1.92834e-06	2.17324e-06	2.19329e-06
785	2.47829e-06	2.225e-06	2.17324e-06	2.29218e-06
786	2.47829e-06	2.225e-06	2.17324e-06	2.29218e-06
787	2.47829e-06	2.225e-06	2.17324e-06	2.29218e-06
788	2.47829e-06	2.225e-06	2.17324e-06	2.29218e-06
789	2.6806e-06	2.37334e-06	2.17324e-06	2.40906e-06
790	2.57945e-06	2.37334e-06	2.17324e-06	2.37534e-06
791	2.6806e-06	2.52167e-06	2.17324e-06	2.4585e-06
792	2.12425e-06	2.52167e-06	1.91756e-06	2.18783e-06
793	3.54042e-06	2.96667e-06	3.70729e-06	3.40479e-06
794	3.54042e-06	2.96667e-06	3.70729e-06	3.40479e-06
795	3.64158e-06	3.115e-06	3.70729e-06	3.48795e-06
796	3.74273e-06	3.26334e-06	3.70729e-06	3.57112e-06
797	4.7037e-06	4.005e-06	4.34647e-06	4.35173e-06
798	4.65312e-06	4.15334e-06	4.0908e-06	4.29909e-06
799	9.25567e-06	1.00867e-05	5.24133e-06	8.19456e-06
800	9.4074e-06	1.08283e-05	5.24133e-06	8.49236e-06
801	4.1777e-05	5.84434e-05	3.0681e-05	4.36338e-05
802	5.24994e-05	7.32767e-05	3.83512e-05	5.47091e-05
803	5.4219e-05	7.57984e-05	3.83512e-05	5.61229e-05
804	5.8164e-05	8.08417e-05	4.00131e-05	5.9673e-05
805	5.85687e-05	8.08417e-05	4.00131e-05	5.98078e-05
806	5.88216e-05	8.09901e-05	4.01409e-05	5.99842e-05
807	5.9125e-05	8.14351e-05	4.02688e-05	6.02763e-05
808	5.99343e-05	8.17317e-05	4.03966e-05	6.06875e-05
809	6.01366e-05	8.20284e-05	4.05245e-05	6.08965e-05
810	6.12493e-05	8.20284e-05	4.05245e-05	6.12674e-05
811	6.12493e-05	8.20284e-05	4.05245e-05	6.12674e-05
812	6.12493e-05	8.20284e-05	4.05245e-05	6.12674e-05
813	6.1401e-05	8.21767e-05	4.05245e-05	6.13674e-05
814	7.19211e-05	8.45501e-05	4.29534e-05	6.64749e-05
815	7.25786e-05	8.45501e-05	4.3209e-05	6.67792e-05
816	7.36407e-05	8.45501e-05	4.35926e-05	6.72611e-05
817	7.36913e-05	8.45501e-05	4.35926e-05	6.7278e-05
818	7.51581e-05	8.45501e-05	4.43596e-05	6.80226e-05
819	7.52592e-05	8.45501e-05	4.43596e-05	6.80563e-05
820	7.5411e-05	8.45501e-05	4.43596e-05	6.81069e-05
821	7.54615e-05	8.45501e-05	4.43596e-05	6.81237e-05
822	6.72174e-05	7.14967e-05	4.1675e-05	6.01297e-05
823	6.34747e-05	6.85301e-05	4.03966e-05	5.74671e-05
824	3.9501e-05	4.15334e-05	3.28542e-05	3.79629e-05
825	4.20298e-05	4.4055e-05	3.37491e-05	3.99447e-05
826	4.15241e-05	4.4055e-05	3.37491e-05	3.97761e-05
827	4.15241e-05	4.4055e-05	3.37491e-05	3.97761e-05
828	4.13723e-05	4.4055e-05	3.34934e-05	3.96403e-05
829	3.42915e-05	3.97534e-05	2.65902e-05	3.3545e-05
830	2.67049e-05	2.759e-05	1.82808e-05	2.41919e-05
831	2.69072e-05	2.759e-05	1.84086e-05	2.43019e-05
832	2.68566e-05	2.74417e-05	1.84086e-05	2.42356e-05
833	2.30633e-05	2.38817e-05	1.45735e-05	2.05062e-05
834	1.4718e-05	1.61683e-05	1.06105e-05	1.38323e-05
835	1.48698e-05	1.75033e-05	1.08662e-05	1.44131e-05
836	1.48698e-05	1.72067e-05	1.07383e-05	1.42716e-05
837	1.48192e-05	1.67617e-05	1.07383e-05	1.41064e-05
838	1.47686e-05	1.67617e-05	1.06105e-05	1.40469e-05
839	1.26949e-05	1.52783e-05	8.30943e-06	1.20942e-05
840	7.03026e-06	7.86167e-06	4.0908e-06	6.32758e-06
841	1.05707e-05	8.30667e-06	6.26403e-06	8.38046e-06
842	1.14305e-05	8.45501e-06	6.39187e-06	8.75913e-06
843	1.16328e-05	8.45501e-06	6.26403e-06	8.78395e-06
844	1.14305e-05	8.15834e-06	6.00836e-06	8.5324e-06
845	8.2947e-06	5.63667e-06	4.72998e-06	6.22045e-06
846	1.28467e-05	5.78501e-06	5.24133e-06	7.95767e-06
847	1.20374e-05	4.005e-06	4.85782e-06	6.96675e-06
848	2.22035e-05	6.52667e-06	6.64755e-06	1.17926e-05
849	2.29622e-05	6.67501e-06	6.77538e-06	1.21375e-05
850	2.29622e-05	6.67501e-06	6.90322e-06	1.21801e-05
851	2.35185e-05	6.82334e-06	7.03106e-06	1.24576e-05
852	2.34679e-05	6.52667e-06	6.90322e-06	1.22993e-05
853	2.47324e-05	6.82334e-06	9.20429e-06	1.35867e-05
854	2.47324e-05	6.82334e-06	9.33213e-06	1.36293e-05
855	2.48335e-05	6.82334e-06	9.45997e-06	1.37056e-05
856	2.48335e-05	6.82334e-06	9.45997e-06	1.37056e-05
857	2.48335e-05	6.82334e-06	9.33213e-06	1.3663e-05
858	2.48335e-05	6.82334e-06	9.45997e-06	1.37056e-05
859	2.48335e-05	6.82334e-06	9.45997e-06	1.37056e-05
860	2.44795e-05	6.82334e-06	9.33213e-06	1.3545e-05
861	2.28104e-05	6.08167e-06	8.82078e-06	1.2571e-05
862	2.36702e-05	6.08167e-06	9.20429e-06	1.29854e-05
863	2.37208e-05	5.93334e-06	9.20429e-06	1.29528e-05
864	2.36197e-05	5.93334e-06	9.20429e-06	1.29191e-05
865	2.33668e-05	5.78501e-06	9.20429e-06	1.27854e-05
866	2.30127e-05	5.63667e-06	9.07646e-06	1.25753e-05
867	9.8626e-06	1.78e-06	6.39187e-06	6.01149e-06
868	1.00143e-05	1.92834e-06	6.51971e-06	6.15412e-06
869	1.00143e-05	2.07667e-06	6.64755e-06	6.24618e-06
870	9.8626e-06	2.07667e-06	6.64755e-06	6.1956e-06
871	6.92911e-06	1.63167e-06	6.39187e-06	4.98422e-06
872	6.87853e-06	1.48333e-06	6.39187e-06	4.91791e-06
873	6.57507e-06	1.335e-06	6.1362e-06	4.68209e-06
874	4.04619e-06	1.03833e-06	4.60215e-06	3.22889e-06
875	4.14735e-06	1.03833e-06	4.72998e-06	3.30522e-06
876	3.43927e-06	8.90001e-07	3.70729e-06	2.67885e-06
877	3.591e-06	1.03833e-06	3.96296e-06	2.8641e-06
878	3.54042e-06	1.03833e-06	3.96296e-06	2.84724e-06
879	3.08522e-06	1.03833e-06	3.70729e-06	2.61028e-06
880	4.09677e-06	1.03833e-06	3.83512e-06	2.99008e-06
881	4.14735e-06	1.03833e-06	3.83512e-06	3.00694e-06
882	4.14735e-06	1.03833e-06	3.83512e-06	3.00694e-06
883	3.99562e-06	1.03833e-06	3.83512e-06	2.95636e-06
884	3.48984e-06	1.03833e-06	3.57945e-06	2.70254e-06
885	3.48984e-06	1.18667e-06	3.70729e-06	2.7946e-06
886	2.17483e-06	1.03833e-06	2.42891e-06	1.88069e-06
887	2.6806e-06	1.335e-06	2.42891e-06	2.14817e-06
888	2.6806e-06	1.18667e-06	2.17324e-06	2.0135e-06
889	2.42772e-06	1.335e-06	1.66189e-06	1.8082e-06
890	2.98407e-06	1.335e-06	1.78972e-06	2.03626e-06
891	3.03465e-06	1.48333e-06	1.78972e-06	2.10257e-06
892	3.08522e-06	1.63167e-06	1.91756e-06	2.21148e-06
893	2.83234e-06	1.335e-06	1.78972e-06	1.98569e-06
894	4.19793e-06	1.63167e-06	2.30107e-06	2.71022e-06
895	4.2485e-06	1.63167e-06	2.30107e-06	2.72708e-06
896	4.29908e-06	1.63167e-06	2.30107e-06	2.74394e-06
897	4.34966e-06	1.63167e-06	2.30107e-06	2.7608e-06
898	4.40024e-06	1.63167e-06	2.30107e-06	2.77766e-06
899	4.2485e-06	1.63167e-06	1.91756e-06	2.59924e-06
900	4.04619e-06	1.63167e-06	2.0454e-06	2.57442e-06
901	3.18638e-06	1.63167e-06	1.78972e-06	2.20259e-06
902	1.77527e-05	1.00867e-05	1.67467e-05	1.4862e-05
903	1.84608e-05	1.068e-05	1.70024e-05	1.5381e-05
904	1.86631e-05	1.08283e-05	1.76416e-05	1.5711e-05
905	1.86631e-05	1.08283e-05	1.76416e-05	1.5711e-05
906	2.02816e-05	1.12733e-05	1.85364e-05	1.66971e-05
907	2.00792e-05	1.1125e-05	1.85364e-05	1.65802e-05
908	3.47973e-05	1.79483e-05	2.49283e-05	2.58913e-05
909	3.51513e-05	1.80967e-05	2.50561e-05	2.61014e-05
910	4.23839e-05	1.97284e-05	2.86356e-05	3.02493e-05
911	4.30414e-05	1.97284e-05	2.88913e-05	3.05537e-05
912	4.33954e-05	1.97284e-05	2.88913e-05	3.06717e-05
913	4.27379e-05	1.958e-05	2.90191e-05	3.04457e-05
914	7.03026e-05	3.05567e-05	4.29534e-05	4.79376e-05
915	7.51581e-05	3.1595e-05	4.41039e-05	5.02857e-05
916	7.59167e-05	3.21884e-05	4.46153e-05	5.09068e-05
917	7.71306e-05	3.23367e-05	4.46153e-05	5.13608e-05
918	7.75858e-05	3.26334e-05	4.44874e-05	5.15689e-05
919	7.73329e-05	3.23367e-05	4.38482e-05	5.11726e-05
920	8.57287e-05	3.66384e-05	5.29247e-05	5.84306e-05
921	8.69426e-05	3.66384e-05	5.42031e-05	5.92613e-05
922	8.34022e-05	3.649e-05	5.3436e-05	5.77761e-05
923	0.000100447	4.06434e-05	7.46571e-05	7.19157e-05
924	0.000101155	4.07917e-05	7.52962e-05	7.24143e-05
925	0.000101863	4.094e-05	7.55519e-05	7.2785e-05
926	0.000101914	4.094e-05	7.55519e-05	7.28018e-05
927	0.00010161	4.01984e-05	7.51684e-05	7.23256e-05
928	0.000101661	4.01984e-05	7.51684e-05	7.23425e-05
929	0.000101357	4.01984e-05	7.50406e-05	7.21987e-05
930	0.000100042	3.94567e-05	7.45292e-05	7.13427e-05
931	9.90306e-05	3.88634e-05	7.41457e-05	7.06799e-05
932	9.87271e-05	3.88634e-05	7.40179e-05	7.05361e-05
933	9.78673e-05	3.8715e-05	7.37622e-05	7.01149e-05
934	9.20003e-05	3.58967e-05	7.19725e-05	6.66232e-05
935	8.83588e-05	3.48584e-05	7.14611e-05	6.48928e-05
936	8.27447e-05	3.3375e-05	6.97992e-05	6.1973e-05
937	6.53966e-05	2.3585e-05	5.86774e-05	4.92197e-05
938	3.90458e-05	1.09767e-05	4.1675e-05	3.05658e-05
939	4.79474e-05	1.6465e-05	4.65328e-05	3.69817e-05
940	4.7998e-05	1.6465e-05	4.65328e-05	3.69986e-05
941	4.76439e-05	1.61683e-05	4.60215e-05	3.66113e-05
942	4.70876e-05	1.602e-05	4.51266e-05	3.60781e-05
943	3.71744e-05	1.39433e-05	3.95018e-05	3.02065e-05
944	4.33954e-05	1.85417e-05	4.28255e-05	3.49209e-05
945	4.31931e-05	1.83933e-05	4.26977e-05	3.47614e-05
946	4.18781e-05	1.76517e-05	4.23142e-05	3.3948e-05
947	4.19287e-05	1.78e-05	4.2442e-05	3.40569e-05
948	4.15746e-05	1.72067e-05	4.18028e-05	3.35281e-05
949	2.82728e-05	1.49817e-05	2.22437e-05	2.18327e-05
950	2.89809e-05	1.67617e-05	2.24994e-05	2.27473e-05
951	2.89809e-05	1.70583e-05	2.21159e-05	2.27184e-05
952	2.21023e-05	1.61683e-05	1.50848e-05	1.77852e-05
953	2.28104e-05	1.691e-05	1.4957e-05	1.82258e-05
954	2.28104e-05	1.691e-05	1.4957e-05	1.82258e-05
955	2.26587e-05	1.66133e-05	1.4957e-05	1.80763e-05
956	2.23552e-05	1.63167e-05	1.45735e-05	1.77485e-05
957	2.2507e-05	1.67617e-05	1.4957e-05	1.80752e-05
958	2.17989e-05	1.602e-05	1.419e-05	1.73363e-05
959	2.17989e-05	1.67617e-05	1.419e-05	1.75835e-05
960	2.08379e-05	1.63167e-05	1.35508e-05	1.69018e-05
961	1.97758e-05	1.54267e-05	1.34229e-05	1.62085e-05
962	1.75504e-05	1.40917e-05	1.1761e-05	1.44677e-05
963	8.64874e-06	8.30667e-06	6.1362e-06	7.6972e-06
964	4.85543e-06	5.93334e-06	3.45161e-06	4.74679e-06
965	5.31063e-06	6.82334e-06	3.83512e-06	5.32303e-06
966	5.26005e-06	6.82334e-06	3.70729e-06	5.26356e-06
967	4.29908e-06	7.26834e-06	2.68459e-06	4.75067e-06
968	6.37276e-06	1.63167e-05	3.57945e-06	8.7563e-06
969	6.2716e-06	1.94317e-05	3.57945e-06	9.76091e-06
970	4.80486e-06	1.958e-05	3.19594e-06	9.1936e-06
971	7.48546e-06	2.78867e-05	3.83512e-06	1.30691e-05
972	7.68777e-06	2.87767e-05	3.83512e-06	1.34332e-05
973	7.53604e-06	2.90734e-05	3.83512e-06	1.34815e-05
974	1.25432e-05	4.25717e-05	8.69294e-06	2.12693e-05
975	1.27961e-05	4.3165e-05	8.69294e-06	2.15514e-05
976	1.33019e-05	4.4055e-05	8.69294e-06	2.20166e-05
977	1.3403e-05	4.43517e-05	8.69294e-06	2.21492e-05
978	1.3403e-05	4.43517e-05	8.69294e-06	2.21492e-05
979	1.3403e-05	4.45e-05	8.69294e-06	2.21987e-05
980	1.3403e-05	4.46484e-05	8.69294e-06	2.22481e-05
981	1.34536e-05	4.46484e-05	8.69294e-06	2.2265e-05
982	1.34536e-05	4.46484e-05	8.43727e-06	2.21797e-05
983	1.34536e-05	4.46484e-05	8.30943e-06	2.21371e-05
984	1.34536e-05	4.46484e-05	8.30943e-06	2.21371e-05
985	1.3403e-05	4.46484e-05	8.30943e-06	2.21203e-05
986	1.33524e-05	4.46484e-05	8.18159e-06	2.20608e-05
987	1.30996e-05	4.45e-05	8.18159e-06	2.19271e-05
988	1.25938e-05	4.30167e-05	8.05376e-06	2.12214e-05
989	1.25432e-05	4.30167e-05	8.05376e-06	2.12046e-05
990	1.14811e-05	3.93084e-05	8.05376e-06	1.96144e-05
991	1.10765e-05	3.58967e-05	7.79808e-06	1.82571e-05
992	1.10765e-05	3.58967e-05	7.79808e-06	1.82571e-05
993	1.08236e-05	3.56e-05	7.79808e-06	1.80739e-05
994	1.06718e-05	3.48584e-05	7.79808e-06	1.77761e-05
995	9.00278e-06	2.83317e-05	6.77538e-06	1.47033e-05
996	7.73835e-06	2.23984e-05	6.1362e-06	1.2091e-05
997	1.66906e-06	9.79001e-06	2.55675e-06	4.67194e-06
998	1.82079e-06	9.79001e-06	2.68459e-06	4.76513e-06
999	1.82079e-06	9.79001e-06	2.68459e-06	4.76513e-06
1000	1.77021e-06	9.19667e-06	2.68459e-06	4.55049e-06
1001	4.55197e-07	2.07667e-06	1.0227e-06	1.18485e-06
1002	5.56352e-07	1.92834e-06	1.0227e-06	1.16913e-06
1003	4.55197e-07	1.18667e-06	1.0227e-06	8.88188e-07
1004	4.04619e-07	1.18667e-06	8.94862e-07	8.28716e-07
1005	4.55197e-07	1.18667e-06	8.94862e-07	8.45576e-07
1006	4.55197e-07	1.18667e-06	8.94862e-07	8.45576e-07
1007	4.55197e-07	1.335e-06	1.0227e-06	9.37632e-07
1008	5.05774e-07	8.90001e-07	1.0227e-06	8.06158e-07
1009	4.55197e-07	4.45e-07	5.1135e-07	4.70516e-07
1010	6.06929e-07	4.45e-07	6.39187e-07	5.63706e-07
1011	6.06929e-07	4.45e-07	6.39187e-07	5.63706e-07
1012	6.06929e-07	4.45e-07	6.39187e-07	5.63706e-07
1013	5.56352e-07	1.48333e-07	3.83512e-07	3.62732e-07
1014	1.21386e-06	1.48333e-07	6.39187e-07	6.67126e-07
1015	1.21386e-06	1.48333e-07	6.39187e-07	6.67126e-07
1016	2.88291e-06	5.93334e-07	1.15054e-06	1.54226e-06
1017	2.88291e-06	5.93334e-07	1.15054e-06	1.54226e-06
1018	2.93349e-06	5.93334e-07	1.15054e-06	1.55912e-06
1019	3.08522e-06	5.93334e-07	1.27837e-06	1.65231e-06
1020	3.1358e-06	5.93334e-07	1.27837e-06	1.66917e-06
1021	3.1358e-06	5.93334e-07	1.27837e-06	1.66917e-06
1022	3.1358e-06	5.93334e-07	1.27837e-06	1.66917e-06
1023	3.1358e-06	5.93334e-07	1.27837e-06	1.66917e-06
1024	3.18638e-06	5.93334e-07	1.27837e-06	1.68603e-06
1025	3.18638e-06	5.93334e-07	1.27837e-06	1.68603e-06
1026	3.18638e-06	5.93334e-07	1.15054e-06	1.64342e-06
1027	3.23696e-06	5.93334e-07	1.15054e-06	1.66028e-06
1028	3.23696e-06	4.45e-07	1.15054e-06	1.61083e-06
1029	2.98407e-06	4.45e-07	1.15054e-06	1.52654e-06
1030	3.48984e-06	4.45e-07	1.91756e-06	1.9508e-06
1031	3.48984e-06	4.45e-07	1.91756e-06	1.9508e-06
1032	3.48984e-06	4.45e-07	1.91756e-06	1.9508e-06
1033	3.18638e-06	5.93334e-07	1.91756e-06	1.89909e-06
1034	3.48984e-06	5.93334e-07	2.0454e-06	2.04286e-06
1035	3.48984e-06	5.93334e-07	2.0454e-06	2.04286e-06
1036	3.38869e-06	5.93334e-07	2.0454e-06	2.00914e-06
1037	2.73118e-06	4.45e-07	1.91756e-06	1.69791e-06
1038	3.08522e-06	2.96667e-07	2.30107e-06	1.89432e-06
1039	2.93349e-06	2.96667e-07	2.30107e-06	1.84374e-06
1040	2.83234e-06	4.45e-07	2.42891e-06	1.90208e-06
1041	2.07367e-06	4.45e-07	2.42891e-06	1.6492e-06
1042	6.57507e-06	3.70834e-06	3.57945e-06	4.62095e-06
1043	7.03026e-06	3.70834e-06	3.83512e-06	4.85791e-06
1044	7.13142e-06	3.70834e-06	4.0908e-06	4.97685e-06
1045	6.92911e-06	3.70834e-06	4.0908e-06	4.90941e-06
1046	7.94066e-06	4.895e-06	4.47431e-06	5.76999e-06
1047	8.39585e-06	5.34e-06	4.60215e-06	6.11267e-06
1048	8.54759e-06	5.34e-06	4.60215e-06	6.16325e-06
1049	3.4595e-05	3.026e-05	1.9687e-05	2.81807e-05
1050	3.60111e-05	3.1595e-05	2.0454e-05	2.93534e-05
1051	3.61629e-05	3.17434e-05	2.0454e-05	2.94534e-05
1052	3.6264e-05	3.18917e-05	2.0454e-05	2.95366e-05
1053	3.64158e-05	3.204e-05	2.0454e-05	2.96366e-05
1054	3.68204e-05	3.23367e-05	2.0454e-05	2.98704e-05
1055	3.68709e-05	3.23367e-05	2.0454e-05	2.98872e-05
1056	3.69215e-05	3.23367e-05	2.0454e-05	2.99041e-05
1057	3.69215e-05	3.23367e-05	1.99426e-05	2.97336e-05
1058	3.70227e-05	3.23367e-05	1.99426e-05	2.97673e-05
1059	3.96527e-05	3.35234e-05	2.03261e-05	3.11674e-05
1060	3.99056e-05	3.35234e-05	2.03261e-05	3.12517e-05
1061	4.02596e-05	3.382e-05	2.0454e-05	3.15112e-05
1062	8.00641e-05	6.45251e-05	3.51553e-05	5.99148e-05
1063	8.89151e-05	7.38701e-05	3.56666e-05	6.61506e-05
1064	8.95726e-05	7.43151e-05	3.59223e-05	6.66033e-05
1065	0.000140706	0.000125045	5.82939e-05	0.000108015
1066	0.000147939	0.000129792	5.91887e-05	0.000112306
1067	0.000147939	0.000129792	5.91887e-05	0.000112306
1068	0.000148445	0.000130385	5.93166e-05	0.000112715
1069	0.000148293	0.000130237	5.93166e-05	0.000112615
1070	0.000148445	0.000130237	5.93166e-05	0.000112666
1071	0.000148242	0.000130237	5.93166e-05	0.000112599
1072	0.000147433	0.000130088	5.85495e-05	0.000112024
1073	0.000146169	0.000130088	5.8166e-05	0.000111474
1074	0.000145865	0.000130237	5.8166e-05	0.000111423
1075	0.000140099	0.000126677	5.59928e-05	0.00010759
1076	0.000149507	0.000128308	5.99557e-05	0.00011259
1077	0.000149203	0.000128308	6.00836e-05	0.000112532
1078	0.000149406	0.00012816	6.00836e-05	0.00011255
1079	0.000149608	0.000127863	5.90609e-05	0.000112177
1080	0.000145815	0.000123265	5.7399e-05	0.000108826
1081	0.000146219	0.000121633	5.80382e-05	0.00010863
1082	0.000146219	0.000121485	5.80382e-05	0.000108581
1083	0.000144045	0.000119853	5.79103e-05	0.000107269
1084	0.000142274	0.000118222	5.77825e-05	0.000106093
1085	9.81202e-05	7.35734e-05	4.74277e-05	7.30404e-05
1086	0.000101104	7.60951e-05	4.94731e-05	7.55575e-05
1087	0.000100497	7.52051e-05	4.93452e-05	7.50159e-05
1088	0.000100346	7.52051e-05	4.93452e-05	7.49653e-05
1089	9.57431e-05	7.28317e-05	4.85782e-05	7.23843e-05
1090	8.15814e-05	5.68117e-05	4.0908e-05	5.9767e-05
1091	7.87996e-05	5.429e-05	3.93739e-05	5.74879e-05
1092	4.82003e-05	2.90734e-05	2.44169e-05	3.38969e-05
1093	5.01728e-05	3.08534e-05	2.50561e-05	3.53608e-05
1094	4.87061e-05	3.026e-05	2.41613e-05	3.43758e-05
1095	4.25356e-05	2.581e-05	2.23715e-05	3.02391e-05
1096	2.73624e-05	1.3795e-05	1.72581e-05	1.94718e-05
1097	3.02453e-05	1.61683e-05	1.89199e-05	2.17779e-05
1098	3.02453e-05	1.61683e-05	1.87921e-05	2.17353e-05
1099	2.11414e-05	1.0235e-05	1.43178e-05	1.52314e-05
1100	2.07367e-05	9.79001e-06	1.43178e-05	1.49482e-05
1101	1.664e-05	9.49334e-06	1.22724e-05	1.28019e-05
1102	1.72975e-05	9.79001e-06	1.26559e-05	1.32478e-05
1103	1.68929e-05	9.79001e-06	1.21446e-05	1.29425e-05
1104	1.72469e-05	9.93834e-06	1.22724e-05	1.31525e-05
1105	1.52238e-05	9.34501e-06	1.08662e-05	1.18117e-05
1106	1.927e-05	1.08283e-05	1.35508e-05	1.45497e-05
1107	1.93206e-05	1.08283e-05	1.36786e-05	1.46092e-05
1108	1.93206e-05	1.08283e-05	1.36786e-05	1.46092e-05
1109	1.927e-05	1.08283e-05	1.36786e-05	1.45923e-05
1110	1.81573e-05	1.05317e-05	1.13775e-05	1.33555e-05
1111	1.77527e-05	1.068e-05	1.07383e-05	1.3057e-05
1112	9.91318e-06	5.93334e-06	6.77538e-06	7.54063e-06
1113	1.65388e-05	1.7355e-05	1.06105e-05	1.48348e-05
1114	1.82585e-05	1.92834e-05	1.12497e-05	1.62638e-05
1115	2.06862e-05	2.10634e-05	1.34229e-05	1.83908e-05
1116	2.67049e-05	2.6255e-05	1.68745e-05	2.32781e-05
1117	2.48335e-05	2.41784e-05	1.58518e-05	2.16212e-05
1118	4.03102e-05	4.19784e-05	2.21159e-05	3.48015e-05
1119	4.05125e-05	4.16817e-05	2.22437e-05	3.48126e-05
1120	4.26368e-05	4.25717e-05	2.31386e-05	3.61157e-05
1121	7.12636e-05	5.53284e-05	4.57658e-05	5.74526e-05
1122	7.19211e-05	5.54767e-05	4.57658e-05	5.77212e-05
1123	7.25786e-05	5.68117e-05	4.60215e-05	5.84706e-05
1124	7.2528e-05	5.68117e-05	4.62771e-05	5.8539e-05
1125	7.25786e-05	5.77017e-05	4.58936e-05	5.87247e-05
1126	9.21521e-05	7.52051e-05	5.53536e-05	7.42369e-05
1127	9.45292e-05	7.75784e-05	5.59928e-05	7.60335e-05
1128	0.000100194	8.12867e-05	5.76547e-05	7.97118e-05
1129	0.000101357	8.27701e-05	5.7399e-05	8.05087e-05
1130	0.000113293	0.00010502	6.69868e-05	9.51001e-05
1131	0.000116227	0.000108432	6.8393e-05	9.76839e-05
1132	0.000116429	0.000108135	6.81373e-05	9.75672e-05
1133	0.000116733	0.000108135	6.81373e-05	9.76684e-05
1134	0.000116682	0.000108135	6.80095e-05	9.76089e-05
1135	0.000116682	0.000108135	6.78817e-05	9.75663e-05
1136	0.000116632	0.000107987	6.7626e-05	9.74148e-05
1137	0.000109551	0.000101608	6.48136e-05	9.19909e-05
1138	0.000103583	9.74551e-05	6.37909e-05	8.82762e-05
1139	0.000122246	0.000121188	7.32508e-05	0.000105562
1140	0.000128467	0.000124452	7.59354e-05	0.000109618
1141	0.000129175	0.000124452	7.59354e-05	0.000109854
1142	0.00012877	0.000124007	7.55519e-05	0.000109443
1143	0.000128922	0.000124155	7.56797e-05	0.000109586
1144	0.000128972	0.000124155	7.52962e-05	0.000109475
1145	0.000124016	0.000122375	7.32508e-05	0.000106547
1146	0.000123156	0.00012193	7.27395e-05	0.000105942
1147	0.000120121	0.000120892	7.13333e-05	0.000104115
1148	9.13934e-05	0.00010235	5.43309e-05	8.26915e-05
1149	9.28096e-05	0.000102647	5.43309e-05	8.32624e-05
1150	9.18486e-05	0.000102053	5.39474e-05	8.26165e-05
1151	6.83301e-05	8.84067e-05	4.26977e-05	6.64782e-05
1152	6.85324e-05	8.84067e-05	4.29534e-05	6.66308e-05
1153	6.48908e-05	8.63301e-05	4.15472e-05	6.4256e-05
1154	6.55484e-05	8.64784e-05	4.18028e-05	6.46099e-05
1155	6.54978e-05	8.64784e-05	4.18028e-05	6.4593e-05
1156	6.19574e-05	8.26217e-05	3.93739e-05	6.13177e-05
1157	6.32724e-05	8.30667e-05	3.93739e-05	6.19043e-05
1158	6.33229e-05	8.30667e-05	3.92461e-05	6.18786e-05
1159	6.21091e-05	8.11384e-05	3.80955e-05	6.04477e-05
1160	6.11481e-05	8.01001e-05	3.73285e-05	5.95256e-05
1161	6.08447e-05	8.01001e-05	3.72007e-05	5.93818e-05
1162	5.72537e-05	7.78751e-05	3.60502e-05	5.70596e-05
1163	2.15966e-05	2.59584e-05	9.07646e-06	1.88771e-05
1164	2.12425e-05	2.61067e-05	8.69294e-06	1.86807e-05
1165	1.64377e-05	2.01734e-05	6.64755e-06	1.44195e-05
1166	1.07224e-05	8.75167e-06	4.47431e-06	7.9828e-06
1167	1.1734e-05	1.09767e-05	4.98566e-06	9.2321e-06
1168	1.14305e-05	1.08283e-05	4.98566e-06	9.0815e-06
1169	7.48546e-06	5.93334e-06	2.94026e-06	5.45302e-06
1170	8.69932e-06	6.08167e-06	3.0681e-06	5.9497e-06
1171	8.59816e-06	6.08167e-06	2.81242e-06	5.83075e-06
1172	8.64874e-06	5.78501e-06	2.81242e-06	5.74872e-06
1173	9.30625e-06	6.37834e-06	3.57945e-06	6.42134e-06
1174	9.8626e-06	6.67501e-06	3.83512e-06	6.79091e-06
1175	9.45798e-06	6.23001e-06	3.83512e-06	6.5077e-06
1176	7.28315e-06	5.19167e-06	3.57945e-06	5.35142e-06
1177	9.55913e-06	6.23001e-06	3.83512e-06	6.54142e-06
1178	9.71087e-06	6.23001e-06	3.83512e-06	6.592e-06
1179	9.60971e-06	6.23001e-06	3.83512e-06	6.55828e-06
1180	9.60971e-06	6.23001e-06	3.83512e-06	6.55828e-06
1181	9.55913e-06	6.23001e-06	3.83512e-06	6.54142e-06
1182	8.44643e-06	5.93334e-06	3.32377e-06	5.90118e-06
1183	8.54759e-06	5.93334e-06	3.45161e-06	5.97751e-06
1184	8.54759e-06	5.93334e-06	3.45161e-06	5.97751e-06
1185	8.54759e-06	5.93334e-06	3.45161e-06	5.97751e-06
1186	7.63719e-06	5.34e-06	2.94026e-06	5.30582e-06
1187	7.68777e-06	5.34e-06	2.94026e-06	5.32268e-06
1188	7.73835e-06	5.34e-06	2.94026e-06	5.33954e-06
1189	7.78892e-06	5.34e-06	2.94026e-06	5.3564e-06
1190	7.73835e-06	5.34e-06	2.94026e-06	5.33954e-06
1191	7.182e-06	5.34e-06	2.81242e-06	5.11147e-06
1192	7.182e-06	5.34e-06	2.81242e-06	5.11147e-06
1193	7.13142e-06	5.19167e-06	2.81242e-06	5.04517e-06
1194	7.03026e-06	5.19167e-06	2.81242e-06	5.01145e-06
1195	5.20948e-06	4.15334e-06	1.53405e-06	3.63229e-06
1196	5.10832e-06	4.15334e-06	1.40621e-06	3.55596e-06
1197	4.95659e-06	3.85667e-06	1.40621e-06	3.40649e-06
1198	9.10394e-07	8.90001e-07	6.39187e-07	8.13194e-07
1199	9.60971e-07	1.18667e-06	7.67024e-07	9.71554e-07
1200	5.56352e-07	7.41667e-07	5.1135e-07	6.03123e-07
1201	7.08084e-07	1.03833e-06	7.67024e-07	8.37814e-07
1202	8.09239e-07	1.18667e-06	8.94862e-07	9.6359e-07
1203	2.88291e-06	5.63667e-06	2.55675e-06	3.69211e-06
1204	2.93349e-06	5.78501e-06	2.55675e-06	3.75841e-06
1205	2.93349e-06	5.63667e-06	2.55675e-06	3.70897e-06
1206	2.88291e-06	5.63667e-06	2.55675e-06	3.69211e-06
1207	3.18638e-06	5.63667e-06	2.42891e-06	3.75065e-06
1208	3.89446e-06	5.78501e-06	2.55675e-06	4.07874e-06
1209	4.14735e-06	6.08167e-06	2.55675e-06	4.26192e-06
1210	4.50139e-06	6.23001e-06	2.55675e-06	4.42938e-06
1211	4.34966e-06	6.08167e-06	2.42891e-06	4.28675e-06
1212	4.60255e-06	6.08167e-06	2.68459e-06	4.45627e-06
1213	4.55197e-06	6.08167e-06	2.68459e-06	4.43941e-06
1214	4.55197e-06	6.08167e-06	2.68459e-06	4.43941e-06
1215	4.55197e-06	6.08167e-06	2.68459e-06	4.43941e-06
1216	4.55197e-06	6.08167e-06	2.68459e-06	4.43941e-06
1217	4.90601e-06	6.08167e-06	2.94026e-06	4.64265e-06
1218	4.90601e-06	6.08167e-06	2.94026e-06	4.64265e-06
1219	4.85543e-06	5.93334e-06	3.0681e-06	4.61896e-06
1220	1.16834e-05	6.97167e-06	8.56511e-06	9.07339e-06
1221	1.1734e-05	7.12001e-06	8.56511e-06	9.13969e-06
1222	1.1734e-05	6.67501e-06	8.56511e-06	8.99136e-06
1223	1.1734e-05	6.52667e-06	8.82078e-06	9.02714e-06
1224	1.16328e-05	6.08167e-06	8.82078e-06	8.84509e-06
1225	1.15822e-05	5.93334e-06	8.82078e-06	8.77878e-06
1226	1.15822e-05	5.93334e-06	8.82078e-06	8.77878e-06
1227	1.14811e-05	5.93334e-06	8.82078e-06	8.74507e-06
1228	1.02672e-05	3.56e-06	8.43727e-06	7.4215e-06
1229	1.00649e-05	2.37334e-06	8.18159e-06	6.87328e-06
1230	8.04181e-06	1.48333e-06	7.28673e-06	5.60396e-06
1231	8.24412e-06	1.48333e-06	7.41457e-06	5.71401e-06
1232	7.89008e-06	1.48333e-06	6.90322e-06	5.42554e-06
1233	2.67049e-05	1.52783e-05	1.40621e-05	1.86818e-05
1234	2.84751e-05	1.58717e-05	1.43178e-05	1.95549e-05
1235	3.12063e-05	1.9135e-05	1.52127e-05	2.18513e-05
1236	3.14592e-05	1.92834e-05	1.52127e-05	2.19851e-05
1237	3.14592e-05	1.92834e-05	1.52127e-05	2.19851e-05
1238	3.15097e-05	1.94317e-05	1.52127e-05	2.20514e-05
1239	2.99418e-05	1.89867e-05	1.47013e-05	2.12099e-05
1240	3.0043e-05	1.9135e-05	1.47013e-05	2.12931e-05
1241	2.97395e-05	1.9135e-05	1.47013e-05	2.1192e-05
1242	2.95878e-05	1.9135e-05	1.47013e-05	2.11414e-05
1243	2.73118e-05	1.869e-05	1.29116e-05	1.96378e-05
1244	2.80705e-05	1.89867e-05	1.30394e-05	2.00322e-05
1245	2.81211e-05	1.89867e-05	1.30394e-05	2.00491e-05
1246	2.81211e-05	1.89867e-05	1.30394e-05	2.00491e-05
1247	2.81211e-05	1.89867e-05	1.30394e-05	2.00491e-05
1248	2.81211e-05	1.89867e-05	1.30394e-05	2.00491e-05
1249	2.79187e-05	1.89867e-05	1.29116e-05	1.9939e-05
1250	2.79187e-05	1.9135e-05	1.26559e-05	1.99032e-05
1251	2.79187e-05	1.9135e-05	1.25281e-05	1.98606e-05
1252	2.71601e-05	1.89867e-05	1.20167e-05	1.93878e-05
1253	2.70589e-05	1.88384e-05	1.20167e-05	1.93047e-05
1254	2.52381e-05	1.76517e-05	1.11219e-05	1.80039e-05
1255	3.33811e-06	1.18667e-06	2.68459e-06	2.40312e-06
1256	3.48984e-06	1.18667e-06	2.81242e-06	2.49631e-06
1257	3.28753e-06	1.18667e-06	2.81242e-06	2.42887e-06
1258	3.23696e-06	1.18667e-06	2.68459e-06	2.3694e-06
1259	1.77021e-06	8.90001e-07	1.53405e-06	1.39809e-06
1260	2.47829e-06	1.92834e-06	1.78972e-06	2.06545e-06
1261	2.57945e-06	2.07667e-06	1.78972e-06	2.14861e-06
1262	2.57945e-06	2.07667e-06	1.78972e-06	2.14861e-06
1263	2.07367e-06	1.92834e-06	1.53405e-06	1.84535e-06
1264	1.71963e-06	1.78e-06	1.15054e-06	1.55006e-06
1265	2.17483e-06	2.07667e-06	1.40621e-06	1.8859e-06
1266	2.22541e-06	2.07667e-06	1.40621e-06	1.90276e-06
1267	2.12425e-06	2.225e-06	1.15054e-06	1.83326e-06
1268	4.29908e-06	3.26334e-06	1.53405e-06	3.03216e-06
1269	4.40024e-06	3.41167e-06	1.53405e-06	3.11532e-06
1270	4.45081e-06	3.41167e-06	1.53405e-06	3.13218e-06
1271	4.45081e-06	3.41167e-06	1.53405e-06	3.13218e-06
1272	4.45081e-06	3.41167e-06	1.53405e-06	3.13218e-06
1273	4.2485e-06	3.41167e-06	1.40621e-06	3.02213e-06
1274	4.34966e-06	3.56e-06	1.66189e-06	3.19052e-06
1275	4.14735e-06	3.56e-06	1.53405e-06	3.08047e-06
1276	4.29908e-06	4.59834e-06	1.91756e-06	3.60499e-06
1277	4.2485e-06	4.74667e-06	1.91756e-06	3.63758e-06
1278	6.82795e-06	6.37834e-06	3.19594e-06	5.46741e-06
1279	6.82795e-06	6.37834e-06	3.19594e-06	5.46741e-06
1280	6.67622e-06	6.37834e-06	3.19594e-06	5.41683e-06
1281	6.7268e-06	6.37834e-06	3.19594e-06	5.43369e-06
1282	6.77738e-06	6.37834e-06	3.19594e-06	5.45055e-06
1283	6.47391e-06	5.34e-06	3.19594e-06	5.00328e-06
1284	6.67622e-06	6.08167e-06	3.45161e-06	5.40317e-06
1285	6.42333e-06	6.08167e-06	3.0681e-06	5.19103e-06
1286	6.67622e-06	6.23001e-06	3.32377e-06	5.41e-06
1287	1.95735e-05	1.43883e-05	9.58781e-06	1.45165e-05
1288	1.95735e-05	1.45367e-05	9.71564e-06	1.46086e-05
1289	1.84608e-05	1.3795e-05	9.71564e-06	1.39905e-05
1290	2.13943e-05	1.61683e-05	1.0227e-05	1.59299e-05
1291	2.16471e-05	1.6465e-05	1.0227e-05	1.6113e-05
1292	2.14448e-05	1.67617e-05	1.0227e-05	1.61445e-05
1293	2.22035e-05	1.67617e-05	1.00992e-05	1.63548e-05
1294	2.23046e-05	1.70583e-05	9.97132e-06	1.64448e-05
1295	2.2507e-05	1.70583e-05	9.97132e-06	1.65122e-05
1296	2.24564e-05	1.70583e-05	9.97132e-06	1.64953e-05
1297	2.24564e-05	1.70583e-05	9.84348e-06	1.64527e-05
1298	2.08379e-05	1.61683e-05	8.69294e-06	1.52331e-05
1299	2.18495e-05	1.75033e-05	8.69294e-06	1.60152e-05
1300	2.18495e-05	1.8245e-05	8.56511e-06	1.62199e-05
1301	2.52887e-05	2.4475e-05	9.84348e-06	1.98691e-05
1302	2.56428e-05	2.46234e-05	9.84348e-06	2.00365e-05
1303	2.56933e-05	2.46234e-05	9.84348e-06	2.00534e-05
1304	2.57439e-05	2.47717e-05	9.84348e-06	2.01197e-05
1305	2.48841e-05	2.38817e-05	9.71564e-06	1.94938e-05
1306	3.87929e-05	4.73184e-05	1.58518e-05	3.39877e-05
1307	3.87423e-05	4.77634e-05	1.58518e-05	3.41192e-05
1308	3.87423e-05	4.77634e-05	1.58518e-05	3.41192e-05
1309	3.83883e-05	4.77634e-05	1.55962e-05	3.39159e-05
1310	3.82871e-05	4.7615e-05	1.54683e-05	3.37902e-05
1311	2.94866e-05	4.15334e-05	1.0227e-05	2.70823e-05
1312	2.43783e-05	3.7825e-05	9.07646e-06	2.37599e-05
1313	2.59462e-05	3.97534e-05	9.33213e-06	2.50106e-05
1314	2.59462e-05	3.97534e-05	9.33213e-06	2.50106e-05
1315	2.41254e-05	3.88634e-05	8.82078e-06	2.39365e-05
1316	2.60474e-05	4.52417e-05	1.0227e-05	2.7172e-05
1317	2.60474e-05	4.539e-05	1.0227e-05	2.72215e-05
1318	2.60474e-05	4.539e-05	1.00992e-05	2.71789e-05
1319	2.6098e-05	4.539e-05	1.00992e-05	2.71957e-05
1320	2.5491e-05	4.361e-05	9.97132e-06	2.63575e-05
1321	2.55922e-05	4.30167e-05	9.97132e-06	2.61934e-05
1322	2.5491e-05	4.3165e-05	9.71564e-06	2.61239e-05
1323	2.54404e-05	4.3165e-05	9.71564e-06	2.6107e-05
1324	2.50358e-05	4.21267e-05	9.58781e-06	2.55834e-05
1325	1.73481e-05	3.12984e-05	8.43727e-06	1.90279e-05
1326	2.31645e-05	3.54517e-05	9.07646e-06	2.25642e-05
1327	2.12931e-05	3.27817e-05	8.69294e-06	2.09226e-05
1328	2.14954e-05	3.27817e-05	8.69294e-06	2.099e-05
1329	2.11919e-05	3.26334e-05	8.56511e-06	2.07968e-05
1330	2.11414e-05	3.26334e-05	8.56511e-06	2.07799e-05
1331	1.91688e-05	2.937e-05	6.64755e-06	1.83955e-05
1332	1.39594e-05	1.92834e-05	3.57945e-06	1.22741e-05
1333	1.46675e-05	2.07667e-05	3.45161e-06	1.29619e-05
1334	1.41617e-05	1.958e-05	3.19594e-06	1.23125e-05
1335	1.43134e-05	1.97284e-05	3.19594e-06	1.24126e-05
1336	1.24926e-05	1.7355e-05	2.94026e-06	1.09293e-05
1337	1.26949e-05	1.76517e-05	2.94026e-06	1.10956e-05
1338	1.26949e-05	1.76517e-05	2.94026e-06	1.10956e-05
1339	1.26949e-05	1.76517e-05	2.94026e-06	1.10956e-05
1340	1.19869e-05	1.61683e-05	2.30107e-06	1.01521e-05
1341	1.08236e-05	1.30533e-05	2.17324e-06	8.68338e-06
1342	1.10259e-05	1.335e-05	2.55675e-06	8.97755e-06
1343	1.1127e-05	1.36467e-05	2.55675e-06	9.11015e-06
1344	1.09247e-05	1.335e-05	2.42891e-06	8.90122e-06
1345	7.94066e-06	1.068e-05	2.17324e-06	6.9313e-06
1346	6.87853e-06	9.93834e-06	2.0454e-06	6.28742e-06
1347	3.1358e-06	5.93334e-06	1.40621e-06	3.49178e-06
1348	3.48984e-06	6.23001e-06	1.40621e-06	3.70869e-06
1349	3.84388e-06	5.48834e-06	1.27837e-06	3.53687e-06
1350	8.14297e-06	7.26834e-06	2.94026e-06	6.11719e-06
1351	8.44643e-06	7.26834e-06	3.0681e-06	6.26096e-06
1352	8.49701e-06	7.12001e-06	3.19594e-06	6.27098e-06
1353	8.34528e-06	6.97167e-06	3.19594e-06	6.17096e-06
1354	7.94066e-06	6.23001e-06	3.19594e-06	5.78887e-06
1355	7.58661e-06	5.93334e-06	3.0681e-06	5.52935e-06
1356	7.68777e-06	5.93334e-06	3.70729e-06	5.77613e-06
1357	7.38431e-06	4.59834e-06	3.83512e-06	5.27259e-06
1358	9.30625e-06	6.67501e-06	7.92592e-06	7.96906e-06
1359	9.30625e-06	6.67501e-06	8.05376e-06	8.01167e-06
1360	9.30625e-06	6.67501e-06	8.05376e-06	8.01167e-06
1361	9.30625e-06	6.67501e-06	8.05376e-06	8.01167e-06
1362	9.30625e-06	6.67501e-06	8.05376e-06	8.01167e-06
1363	9.30625e-06	6.37834e-06	8.05376e-06	7.91278e-06
1364	9.30625e-06	6.37834e-06	8.18159e-06	7.95539e-06
1365	9.4074e-06	6.37834e-06	8.18159e-06	7.98911e-06
1366	9.4074e-06	6.37834e-06	8.18159e-06	7.98911e-06
1367	9.35682e-06	6.37834e-06	8.05376e-06	7.92964e-06
1368	7.99123e-06	4.895e-06	7.67024e-06	6.85216e-06
1369	1.06213e-05	6.23001e-06	1.15054e-05	9.45221e-06
1370	1.0773e-05	6.37834e-06	1.15054e-05	9.55223e-06
1371	1.0773e-05	6.37834e-06	1.15054e-05	9.55223e-06
1372	9.76144e-06	5.34e-06	1.13775e-05	8.82633e-06
1373	9.50856e-06	5.34e-06	1.12497e-05	8.69942e-06
1374	8.54759e-06	5.34e-06	1.11219e-05	8.33648e-06
1375	6.42333e-06	5.04334e-06	1.04827e-05	7.31645e-06
1376	7.28315e-06	5.34e-06	1.08662e-05	7.82978e-06
1377	7.08084e-06	5.19167e-06	1.04827e-05	7.58506e-06
1378	3.18132e-05	1.335e-05	2.22437e-05	2.2469e-05
1379	3.22684e-05	1.36467e-05	2.27551e-05	2.289e-05
1380	3.24201e-05	1.36467e-05	2.28829e-05	2.29832e-05
1381	3.27742e-05	1.3795e-05	2.30107e-05	2.31933e-05
1382	3.27742e-05	1.3795e-05	2.30107e-05	2.31933e-05
1383	3.30271e-05	1.39433e-05	2.32664e-05	2.34123e-05
1384	3.34317e-05	1.34983e-05	2.22437e-05	2.30579e-05
1385	8.00641e-05	2.72934e-05	5.08793e-05	5.27456e-05
1386	8.98761e-05	2.8925e-05	5.40752e-05	5.76255e-05
1387	9.09888e-05	2.95184e-05	5.49701e-05	5.84924e-05
1388	9.109e-05	2.937e-05	5.50979e-05	5.85193e-05
1389	9.12417e-05	2.937e-05	5.50979e-05	5.85699e-05
1390	9.13934e-05	2.937e-05	5.49701e-05	5.85778e-05
1391	9.12417e-05	2.937e-05	5.44587e-05	5.83568e-05
1392	9.2759e-05	2.90734e-05	5.3436e-05	5.84228e-05
1393	9.91823e-05	2.96667e-05	5.56093e-05	6.14861e-05
1394	0.000100295	2.96667e-05	5.62485e-05	6.20701e-05
1395	0.000101155	2.96667e-05	5.61206e-05	6.23141e-05
1396	0.000100851	2.937e-05	5.48423e-05	6.16879e-05
1397	0.000101812	2.96667e-05	5.54814e-05	6.23202e-05
1398	0.000101357	2.95184e-05	5.52258e-05	6.20338e-05
1399	9.16463e-05	2.72934e-05	5.21577e-05	5.70324e-05
1400	0.000108236	3.58967e-05	7.09498e-05	7.16941e-05
1401	0.000108893	3.6045e-05	7.18446e-05	7.2261e-05
1402	0.000109298	3.58967e-05	7.18446e-05	7.23464e-05
1403	0.000108994	3.5155e-05	7.18446e-05	7.1998e-05
1404	0.000108387	3.5155e-05	7.18446e-05	7.17957e-05
1405	8.13285e-05	2.3585e-05	6.54528e-05	5.67888e-05
1406	0.000109955	3.382e-05	7.47849e-05	7.28534e-05
1407	0.000119565	3.66384e-05	7.79808e-05	7.80614e-05
1408	0.000122296	3.66384e-05	8.00262e-05	7.96536e-05
1409	0.000138279	3.90117e-05	8.4117e-05	8.71358e-05
1410	0.000140605	3.916e-05	8.39892e-05	8.79182e-05
1411	0.000140201	3.9605e-05	8.42449e-05	8.80168e-05
1412	0.000141718	4.005e-05	8.56511e-05	8.91397e-05
1413	0.000141364	4.005e-05	8.53954e-05	8.89365e-05
1414	0.000137267	3.94567e-05	8.36057e-05	8.67765e-05
1415	0.000131602	3.7825e-05	8.13046e-05	8.35774e-05
1416	0.000117795	3.58967e-05	7.7853e-05	7.71815e-05
1417	0.000132412	4.64284e-05	7.92592e-05	8.60331e-05
1418	0.000132867	4.70217e-05	7.88757e-05	8.62548e-05
1419	0.000132513	4.70217e-05	7.84922e-05	8.60089e-05
1420	0.000131855	4.70217e-05	7.79808e-05	8.56193e-05
1421	0.000120273	4.64284e-05	6.14898e-05	7.60638e-05
1422	0.000130237	5.97784e-05	6.25125e-05	8.41759e-05
1423	0.000128972	6.00751e-05	5.91887e-05	8.27454e-05
1424	0.000129579	6.02234e-05	5.86774e-05	8.28267e-05
1425	0.000129326	5.97784e-05	5.76547e-05	8.22532e-05
1426	0.000129124	5.97784e-05	5.71433e-05	8.20153e-05
1427	0.000112383	5.2955e-05	3.75842e-05	6.76408e-05
1428	0.000106465	5.17684e-05	3.57945e-05	6.46761e-05
1429	8.05193e-05	4.61317e-05	2.90191e-05	5.189e-05
1430	8.13285e-05	4.73184e-05	2.95304e-05	5.27258e-05
1431	8.08733e-05	4.73184e-05	2.92748e-05	5.24888e-05
1432	8.07722e-05	4.73184e-05	2.92748e-05	5.24551e-05
1433	7.68271e-05	4.64284e-05	2.72294e-05	5.01616e-05
1434	6.42839e-05	4.34617e-05	2.18602e-05	4.32019e-05
1435	6.29689e-05	4.33134e-05	2.10932e-05	4.24585e-05
1436	4.3092e-05	3.97534e-05	1.4957e-05	3.26008e-05
1437	4.12206e-05	3.8715e-05	1.34229e-05	3.11195e-05
1438	4.117e-05	3.8715e-05	1.34229e-05	3.11027e-05
1439	4.09171e-05	3.85667e-05	1.34229e-05	3.09689e-05
1440	4.06137e-05	3.85667e-05	1.34229e-05	3.08678e-05
1441	3.37857e-05	3.471e-05	1.0227e-05	2.62409e-05
1442	6.82795e-06	6.37834e-06	3.45161e-06	5.55263e-06
1443	1.32513e-05	1.49817e-05	6.77538e-06	1.16695e-05
1444	1.45157e-05	1.66133e-05	7.28673e-06	1.28053e-05
1445	1.68423e-05	1.94317e-05	8.30943e-06	1.48611e-05
1446	1.77527e-05	1.89867e-05	8.69294e-06	1.51441e-05
1447	1.79044e-05	1.94317e-05	7.79808e-06	1.50447e-05
1448	5.37132e-05	7.41667e-05	2.09653e-05	4.96151e-05
1449	5.53823e-05	7.71334e-05	2.18602e-05	5.14586e-05
1450	5.56858e-05	7.71334e-05	2.16045e-05	5.14746e-05
1451	5.56858e-05	7.72817e-05	2.17324e-05	5.15666e-05
1452	5.58375e-05	7.72817e-05	2.17324e-05	5.16172e-05
1453	5.56352e-05	7.80234e-05	2.13488e-05	5.16691e-05
1454	0.000111321	0.000153525	4.10358e-05	0.000101961
1455	0.000116935	0.000157975	4.20585e-05	0.000105656
1456	0.000131501	0.00016821	4.76834e-05	0.000115798
1457	0.000154818	0.000181708	5.75268e-05	0.000131351
1458	0.000157245	0.000182895	5.8166e-05	0.000132769
1459	0.000158257	0.000184082	5.80382e-05	0.000133459
1460	0.000158409	0.000184527	5.8166e-05	0.0001337
1461	0.000158257	0.000184675	5.80382e-05	0.000133657
1462	0.000159521	0.000184675	5.8166e-05	0.000134121
1463	0.000190475	0.000196245	6.7626e-05	0.000151449
1464	0.000191436	0.000196394	6.7626e-05	0.000151818
1465	0.000191436	0.000196097	6.71146e-05	0.000151549
1466	0.000191638	0.000196394	6.71146e-05	0.000151715
1467	0.000190677	0.000195652	6.6859e-05	0.000151063
1468	0.000178235	0.000185268	6.49414e-05	0.000142815
1469	0.000181067	0.000184823	6.50692e-05	0.000143653
1470	0.000180713	0.000183637	6.49414e-05	0.000143097
1471	0.000168069	0.0001691	6.18733e-05	0.000133014
1472	0.000174593	0.000170435	6.37909e-05	0.000136273
1473	0.000165995	0.000159755	6.18733e-05	0.000129208
1474	0.000151833	0.000141362	5.99557e-05	0.000117717
1475	0.000184506	0.000164502	9.52389e-05	0.000148082
1476	0.000185265	0.000164353	9.69008e-05	0.00014884
1477	0.00017778	0.000160348	9.70286e-05	0.000145052
1478	0.00017778	0.000160497	9.71564e-05	0.000145144
1479	0.00017515	0.000159162	9.69008e-05	0.000143737
1480	0.000173986	0.000158272	9.70286e-05	0.000143096
1481	0.000172823	0.000158123	9.67729e-05	0.000142573
1482	0.000170749	0.000155898	9.67729e-05	0.00014114
1483	0.000129984	0.000101163	7.14611e-05	0.00010087
1484	0.000143539	0.000103685	8.9614e-05	0.000112279
1485	0.000149305	0.000104723	9.47275e-05	0.000116252
1486	0.00012963	8.60334e-05	8.85913e-05	0.000101418
1487	0.000135649	8.61817e-05	9.94575e-05	0.000107096
1488	0.000135396	8.57367e-05	9.9841e-05	0.000106991
1489	0.000104291	5.3845e-05	8.89748e-05	8.23702e-05
1490	0.000123257	6.34867e-05	0.000109557	9.87669e-05
1491	0.000123105	6.33384e-05	0.000109685	9.87095e-05
1492	0.000110815	5.35484e-05	0.000105977	9.01136e-05
1493	0.000145764	6.79367e-05	0.000124514	0.000112738
1494	0.00014976	6.71951e-05	0.000124897	0.000113951
1495	0.000155323	6.83817e-05	0.000128093	0.000117266
1496	0.000155222	6.71951e-05	0.000128349	0.000116922
1497	0.000153047	6.66017e-05	0.000127965	0.000115871
1498	0.000178235	6.94201e-05	0.000152127	0.00013326
1499	0.000179145	6.94201e-05	0.000152638	0.000133734
1500	0.000179246	6.94201e-05	0.000152638	0.000133768
1501	0.000176768	6.91234e-05	0.000151999	0.00013263
1502	0.000176869	6.91234e-05	0.000151999	0.000132664
1503	0.000176616	6.91234e-05	0.000151871	0.000132537
1504	0.000165489	6.55634e-05	0.000146885	0.000125979
1505	0.000166096	6.57117e-05	0.000148675	0.000126828
1506	0.000166248	6.57117e-05	0.000148675	0.000126878
1507	0.000166248	6.57117e-05	0.000148675	0.000126878
1508	0.000165945	6.52667e-05	0.000148291	0.000126501
1509	0.000165945	6.52667e-05	0.000148291	0.000126501
1510	0.000165692	6.51184e-05	0.000148164	0.000126325
1511	0.000165489	6.49701e-05	0.00014778	0.00012608
1512	0.000156942	6.17067e-05	0.000140238	0.000119629
1513	0.000149861	5.78501e-05	0.000137937	0.000115216
1514	0.000136913	5.32517e-05	0.00012771	0.000105958
1515	0.000136559	5.31034e-05	0.000127837	0.000105833
1516	0.00013489	5.251e-05	0.00012707	0.000104823
1517	0.000102166	3.649e-05	8.93584e-05	7.60049e-05
1518	5.91756e-05	1.4685e-05	5.99557e-05	4.46055e-05
1519	5.94791e-05	1.4685e-05	6.05949e-05	4.49197e-05
1520	3.77308e-05	9.19667e-06	4.6405e-05	3.11108e-05
1521	5.03245e-05	1.40917e-05	5.31804e-05	3.91989e-05
1522	4.82509e-05	1.335e-05	5.16463e-05	3.77491e-05
1523	4.61772e-05	1.30533e-05	4.90896e-05	3.61067e-05
1524	4.54185e-05	1.2905e-05	4.70442e-05	3.51226e-05
1525	3.50502e-05	1.09767e-05	2.78686e-05	2.46318e-05
1526	6.05918e-05	2.4475e-05	4.47431e-05	4.327e-05
1527	6.14516e-05	2.5365e-05	4.53823e-05	4.40663e-05
1528	6.14516e-05	2.52167e-05	4.55101e-05	4.40595e-05
1529	6.28677e-05	2.5365e-05	4.57658e-05	4.46662e-05
1530	6.30195e-05	2.5365e-05	4.60215e-05	4.4802e-05
1531	6.35758e-05	2.55134e-05	4.57658e-05	4.49517e-05
1532	6.60541e-05	2.55134e-05	4.62771e-05	4.59482e-05
1533	6.70657e-05	2.55134e-05	4.6405e-05	4.6328e-05
1534	6.75714e-05	2.5365e-05	4.65328e-05	4.64898e-05
1535	6.77738e-05	2.5365e-05	4.66607e-05	4.65998e-05
1536	6.79761e-05	2.5365e-05	4.66607e-05	4.66672e-05
1537	6.78243e-05	2.50684e-05	4.66607e-05	4.65178e-05
1538	6.66611e-05	2.50684e-05	4.58936e-05	4.58743e-05
1539	6.65599e-05	2.50684e-05	4.58936e-05	4.58406e-05
1540	6.2362e-05	2.43267e-05	4.25699e-05	4.30862e-05
1541	6.23114e-05	2.43267e-05	4.25699e-05	4.30693e-05
1542	6.05412e-05	2.37334e-05	4.11636e-05	4.18127e-05
1543	3.82871e-05	1.58717e-05	2.28829e-05	2.56806e-05
1544	3.90458e-05	1.602e-05	2.31386e-05	2.60681e-05
1545	3.89952e-05	1.58717e-05	2.31386e-05	2.60018e-05
1546	3.63652e-05	1.45367e-05	2.24994e-05	2.44671e-05
1547	3.60111e-05	1.424e-05	2.26272e-05	2.42928e-05
1548	3.60111e-05	1.424e-05	2.26272e-05	2.42928e-05
1549	3.591e-05	1.424e-05	2.26272e-05	2.42591e-05
1550	3.37857e-05	1.32017e-05	2.23715e-05	2.31197e-05
1551	2.65532e-05	7.56501e-06	2.08375e-05	1.83186e-05
1552	2.39737e-05	6.97167e-06	1.9687e-05	1.68774e-05
1553	2.39737e-05	6.97167e-06	1.9687e-05	1.68774e-05
1554	2.27598e-05	6.82334e-06	1.91756e-05	1.62529e-05
1555	2.57945e-06	5.93334e-07	1.66189e-06	1.61156e-06
1556	2.6806e-06	1.03833e-06	1.78972e-06	1.83622e-06
1557	2.6806e-06	1.03833e-06	1.78972e-06	1.83622e-06
1558	2.17483e-06	1.03833e-06	1.0227e-06	1.41195e-06
1559	3.99562e-06	2.96667e-06	2.81242e-06	3.25824e-06
1560	3.89446e-06	3.26334e-06	2.55675e-06	3.23818e-06
1561	3.89446e-06	3.26334e-06	2.55675e-06	3.23818e-06
1562	3.89446e-06	3.26334e-06	2.55675e-06	3.23818e-06
1563	3.64158e-06	3.26334e-06	2.55675e-06	3.15389e-06
1564	3.591e-06	3.26334e-06	2.55675e-06	3.13703e-06
1565	3.74273e-06	3.26334e-06	2.55675e-06	3.1876e-06
1566	3.74273e-06	3.26334e-06	2.55675e-06	3.1876e-06
1567	3.591e-06	3.26334e-06	2.55675e-06	3.13703e-06
1568	2.6806e-06	3.26334e-06	2.55675e-06	2.83356e-06
1569	2.73118e-06	3.26334e-06	2.55675e-06	2.85042e-06
1570	2.73118e-06	3.26334e-06	2.30107e-06	2.7652e-06
1571	2.6806e-06	2.81834e-06	2.17324e-06	2.55739e-06
1572	2.93349e-06	2.81834e-06	2.17324e-06	2.64169e-06
1573	2.98407e-06	2.81834e-06	2.17324e-06	2.65855e-06
1574	6.47391e-06	6.97167e-06	3.70729e-06	5.71762e-06
1575	7.13142e-06	7.41667e-06	3.96296e-06	6.17035e-06
1576	7.23257e-06	7.71334e-06	3.83512e-06	6.26035e-06
1577	9.20509e-06	8.01001e-06	4.98566e-06	7.40025e-06
1578	9.4074e-06	8.01001e-06	4.98566e-06	7.46769e-06
1579	8.2947e-06	7.12001e-06	4.47431e-06	6.62967e-06
1580	1.06718e-05	8.90001e-06	5.1135e-06	8.22845e-06
1581	1.06718e-05	8.75167e-06	5.1135e-06	8.179e-06
1582	3.22178e-05	1.88384e-05	1.31673e-05	2.14078e-05
1583	3.27742e-05	1.94317e-05	1.34229e-05	2.18763e-05
1584	3.3988e-05	2.0025e-05	1.39343e-05	2.26491e-05
1585	3.3988e-05	2.0025e-05	1.39343e-05	2.26491e-05
1586	3.40386e-05	2.0025e-05	1.39343e-05	2.2666e-05
1587	3.40386e-05	2.0025e-05	1.39343e-05	2.2666e-05
1588	3.40386e-05	2.01734e-05	1.39343e-05	2.27154e-05
1589	3.39375e-05	2.03217e-05	1.35508e-05	2.26033e-05
1590	6.09964e-05	4.61317e-05	2.00705e-05	4.23995e-05
1591	7.37925e-05	5.74051e-05	2.14767e-05	5.08914e-05
1592	7.82433e-05	6.03717e-05	2.17324e-05	5.34491e-05
1593	8.04687e-05	6.28934e-05	2.18602e-05	5.50741e-05
1594	8.26941e-05	6.42284e-05	2.21159e-05	5.63461e-05
1595	8.21883e-05	6.49701e-05	2.21159e-05	5.64248e-05
1596	9.93341e-05	7.16451e-05	2.87634e-05	6.65809e-05
1597	9.96375e-05	7.16451e-05	2.90191e-05	6.67672e-05
1598	9.97893e-05	7.16451e-05	2.91469e-05	6.68604e-05
1599	9.97893e-05	7.16451e-05	2.90191e-05	6.68178e-05
1600	9.98904e-05	7.16451e-05	2.90191e-05	6.68515e-05
1601	9.85754e-05	7.13484e-05	2.87634e-05	6.62291e-05
1602	9.7665e-05	7.09034e-05	2.85077e-05	6.56921e-05
1603	0.000132007	7.75784e-05	4.05245e-05	8.337e-05
1604	0.000132968	7.80234e-05	4.02688e-05	8.37534e-05
1605	0.000133272	7.80234e-05	4.02688e-05	8.38546e-05
1606	0.00013317	7.80234e-05	4.03966e-05	8.38635e-05
1607	0.000133272	7.80234e-05	4.06523e-05	8.39824e-05
1608	0.000130996	7.69851e-05	3.98853e-05	8.2622e-05
1609	0.000131046	7.69851e-05	3.97574e-05	8.25962e-05
1610	0.000129984	7.69851e-05	3.95018e-05	8.21569e-05
1611	0.000129579	7.65401e-05	3.97574e-05	8.1959e-05
1612	0.000117238	6.49701e-05	3.59223e-05	7.27103e-05
1613	8.92692e-05	5.251e-05	3.04253e-05	5.74015e-05
1614	8.95221e-05	5.26584e-05	3.02975e-05	5.74926e-05
1615	8.27447e-05	4.55384e-05	2.87634e-05	5.23488e-05
1616	5.57363e-05	1.66133e-05	2.45448e-05	3.22982e-05
1617	6.87853e-05	1.9135e-05	3.09367e-05	3.9619e-05
1618	6.95945e-05	1.9135e-05	3.13202e-05	4.00166e-05
1619	6.9898e-05	1.89867e-05	3.1448e-05	4.01109e-05
1620	6.61047e-05	1.63167e-05	2.97861e-05	3.74025e-05
1621	6.92911e-05	1.691e-05	3.02975e-05	3.88329e-05
1622	6.75209e-05	1.602e-05	3.00418e-05	3.78609e-05
1623	6.45368e-05	1.54267e-05	2.92748e-05	3.64128e-05
1624	5.44213e-05	1.23117e-05	2.63345e-05	3.10225e-05
1625	3.5303e-05	9.34501e-06	2.08375e-05	2.18285e-05
1626	5.80123e-05	1.63167e-05	3.15758e-05	3.53016e-05
1627	6.90382e-05	1.8245e-05	3.47718e-05	4.0685e-05
1628	6.86842e-05	1.80967e-05	3.46439e-05	4.04749e-05
1629	6.84818e-05	1.79483e-05	3.36212e-05	4.00171e-05
1630	6.97969e-05	1.85417e-05	3.40048e-05	4.07811e-05
1631	6.88359e-05	1.83933e-05	3.32377e-05	4.01557e-05
1632	6.90888e-05	1.869e-05	3.33656e-05	4.03815e-05
1633	6.8937e-05	1.869e-05	3.33656e-05	4.03309e-05
1634	6.59024e-05	1.7355e-05	2.91469e-05	3.74681e-05
1635	6.81278e-05	1.9135e-05	3.19594e-05	3.97407e-05
1636	6.79761e-05	1.9135e-05	3.2215e-05	3.97754e-05
1637	6.79761e-05	1.9135e-05	3.2215e-05	3.97754e-05
1638	6.79761e-05	1.9135e-05	3.2215e-05	3.97754e-05
1639	6.78243e-05	1.89867e-05	3.19594e-05	3.95901e-05
1640	6.73691e-05	1.89867e-05	3.15758e-05	3.93106e-05
1641	6.69645e-05	1.83933e-05	3.1448e-05	3.89353e-05
1642	6.69139e-05	1.83933e-05	3.1448e-05	3.89184e-05
1643	6.66105e-05	1.8245e-05	3.11923e-05	3.86826e-05
1644	5.10832e-05	1.49817e-05	2.58232e-05	3.06293e-05
1645	5.0628e-05	1.48333e-05	2.5184e-05	3.02151e-05
1646	2.16471e-05	7.86167e-06	1.61075e-05	1.52054e-05
1647	2.40749e-05	1.691e-05	1.72581e-05	1.94143e-05
1648	1.38076e-05	1.75033e-05	1.27837e-05	1.46982e-05
1649	2.30633e-05	4.806e-05	1.85364e-05	2.98866e-05
1650	2.32656e-05	4.8505e-05	1.86643e-05	3.0145e-05
1651	2.19506e-05	4.88017e-05	1.78972e-05	2.95499e-05
1652	2.07873e-05	5.17684e-05	1.6491e-05	2.96822e-05
1653	3.58594e-05	0.00011303	3.50275e-05	6.13057e-05
1654	3.76802e-05	0.000120595	3.75842e-05	6.52865e-05
1655	3.77813e-05	0.000122227	3.7712e-05	6.59067e-05
1656	3.77813e-05	0.000122227	3.7712e-05	6.59067e-05
1657	3.77813e-05	0.000122672	3.75842e-05	6.60124e-05
1658	3.7225e-05	0.00012282	3.68172e-05	6.56208e-05
1659	3.77813e-05	0.000129792	3.72007e-05	6.82579e-05
1660	4.27885e-05	0.00014863	4.20585e-05	7.78257e-05
1661	4.2485e-05	0.00014952	4.02688e-05	7.74247e-05
1662	8.3908e-05	0.000239707	9.30656e-05	0.000138893
1663	8.58805e-05	0.000241784	9.66451e-05	0.000141436
1664	8.66897e-05	0.000242822	9.75399e-05	0.000142351
1665	8.70438e-05	0.000243564	9.84348e-05	0.000143014
1666	8.70438e-05	0.000243712	9.85626e-05	0.000143106
1667	8.76001e-05	0.000244305	9.9074e-05	0.00014366
1668	8.84094e-05	0.000245344	9.89462e-05	0.000144233
1669	9.109e-05	0.000247717	0.000100864	0.000146557
1670	8.48689e-05	0.000240152	0.000100352	0.000141791
1671	0.000250965	0.000593482	0.000310645	0.000385031
1672	0.00027064	0.000621666	0.000321767	0.000404691
1673	0.000286926	0.000646734	0.000332249	0.00042197
1674	0.000299064	0.000665127	0.000341454	0.000435215
1675	0.00030043	0.000667056	0.000342349	0.000436611
1676	0.000300936	0.000667649	0.000342988	0.000437191
1677	0.00030134	0.000667649	0.000343499	0.000437496
1678	0.000301492	0.000667797	0.00034401	0.000437767
1679	0.000301644	0.000667649	0.000344266	0.000437853
1680	0.0003022	0.000667649	0.000344266	0.000438038
1681	0.00030306	0.000668094	0.00034465	0.000438601
1682	0.000304122	0.000669429	0.000344522	0.000439358
1683	0.000308978	0.000675362	0.000345417	0.000443252
1684	0.000330372	0.000686042	0.000352448	0.000456287
1685	0.000332243	0.000688564	0.000347334	0.000456047
1686	0.000341044	0.000698651	0.000339536	0.000459743
1687	0.000366686	0.000708589	0.000351681	0.000475652
1688	0.000379584	0.000714226	0.000354493	0.000482767
1689	0.000382669	0.000716302	0.000354365	0.000484445
1690	0.000380393	0.000715561	0.00035347	0.000483141
1691	0.000379584	0.000714967	0.000352959	0.000482503
1692	0.000322735	0.000643026	0.000296199	0.000420653
1693	0.000328804	0.000647031	0.000300162	0.000425332
1694	0.000300076	0.000570491	0.000285717	0.000385428
1695	0.000311405	0.000578946	0.00029262	0.000394324
1696	0.000312265	0.000580429	0.000293003	0.000395232
1697	0.000312771	0.000579984	0.000293131	0.000395295
1698	0.000310647	0.000576276	0.000292364	0.000393095
1699	0.000309635	0.000574941	0.000291981	0.000392185
1700	0.000308421	0.000574199	0.000291086	0.000391235
1701	0.000307207	0.000572271	0.000288785	0.000389421
1702	0.000304072	0.000564409	0.000285844	0.000384775
1703	0.000299216	0.00055447	0.000279964	0.000377884
1704	0.000298154	0.00055358	0.000278174	0.000376636
1705	0.000291984	0.000541269	0.000272422	0.000368558
1706	0.000285408	0.000525694	0.000263601	0.000358234
1707	0.000150822	0.000235405	0.000106744	0.000164324
1708	0.000151429	0.000235257	0.000106489	0.000164391
1709	0.00012791	0.00019758	9.17873e-05	0.000139093
1710	7.81927e-05	0.00010324	5.98279e-05	8.04202e-05
1711	0.000106465	0.00012816	6.8393e-05	0.000101006
1712	0.000109955	0.000129495	6.85209e-05	0.000102657
1713	0.000110006	0.000128902	6.82652e-05	0.000102391
1714	8.48184e-05	9.46368e-05	5.02401e-05	7.65651e-05
1715	0.0001226	0.00012549	6.08506e-05	0.00010298
1716	0.000127152	0.000128902	6.12341e-05	0.000105763
1717	0.000116176	0.000104278	5.21577e-05	9.08708e-05
1718	0.000116379	0.000104723	5.21577e-05	9.10866e-05
1719	0.00011562	0.000104575	5.1902e-05	9.0699e-05
1720	0.000115418	0.000104575	5.17742e-05	9.0589e-05
1721	0.00011213	0.000102795	4.99844e-05	8.83032e-05
1722	0.000103026	9.27084e-05	4.15472e-05	7.90939e-05
1723	0.000102419	9.22634e-05	4.11636e-05	7.86155e-05
1724	9.10394e-05	8.18801e-05	3.25985e-05	6.8506e-05
1725	9.81202e-05	8.46984e-05	3.5411e-05	7.27432e-05
1726	9.80696e-05	8.48467e-05	3.55388e-05	7.28184e-05
1727	0.000100042	8.35117e-05	3.46439e-05	7.27326e-05
1728	0.000108489	8.52917e-05	3.83512e-05	7.73772e-05
1729	0.000110259	8.52917e-05	3.86069e-05	7.80525e-05
1730	0.000109045	8.42534e-05	3.79677e-05	7.70887e-05
1731	0.000108994	8.42534e-05	3.82234e-05	7.71571e-05
1732	0.000108489	8.35117e-05	3.82234e-05	7.67412e-05
1733	0.000107983	8.30667e-05	3.7712e-05	7.62539e-05
1734	7.53604e-05	5.08784e-05	2.56953e-05	5.06447e-05
1735	7.69789e-05	5.13234e-05	2.86356e-05	5.23126e-05
1736	7.68777e-05	5.13234e-05	2.86356e-05	5.22789e-05
1737	7.56133e-05	5.0285e-05	2.82521e-05	5.13835e-05
1738	6.66611e-05	4.34617e-05	2.58232e-05	4.53153e-05
1739	2.97901e-05	1.48333e-05	1.5724e-05	2.01158e-05
1740	5.03751e-05	1.691e-05	4.78112e-05	3.83654e-05
1741	6.044e-05	1.80967e-05	6.45579e-05	4.76982e-05
1742	6.32724e-05	1.8245e-05	6.78817e-05	4.97997e-05
1743	6.7268e-05	1.72067e-05	7.389e-05	5.27882e-05
1744	7.13648e-05	1.70583e-05	8.01541e-05	5.61924e-05
1745	7.445e-05	1.75033e-05	8.43727e-05	5.87753e-05
1746	7.51581e-05	1.66133e-05	8.66738e-05	5.94817e-05
1747	6.93922e-05	1.49817e-05	8.4117e-05	5.61636e-05
1748	7.37925e-05	1.5575e-05	9.01254e-05	5.9831e-05
1749	7.42982e-05	1.5575e-05	9.01254e-05	5.99995e-05
1750	7.43488e-05	1.5575e-05	9.01254e-05	6.00164e-05
1751	7.42982e-05	1.5575e-05	9.01254e-05	5.99995e-05
1752	7.40959e-05	1.54267e-05	9.01254e-05	5.98827e-05
1753	7.40959e-05	1.54267e-05	9.01254e-05	5.98827e-05
1754	7.40454e-05	1.54267e-05	9.01254e-05	5.98658e-05
1755	7.40454e-05	1.54267e-05	9.01254e-05	5.98658e-05
1756	7.37419e-05	1.54267e-05	8.98697e-05	5.96794e-05
1757	7.36913e-05	1.54267e-05	8.9614e-05	5.95773e-05
1758	7.36913e-05	1.54267e-05	8.9614e-05	5.95773e-05
1759	7.36913e-05	1.54267e-05	8.9614e-05	5.95773e-05
1760	7.36913e-05	1.54267e-05	8.9614e-05	5.95773e-05
1761	7.36913e-05	1.54267e-05	8.9614e-05	5.95773e-05
1762	7.36913e-05	1.54267e-05	8.9614e-05	5.95773e-05
1763	7.36407e-05	1.54267e-05	8.9614e-05	5.95605e-05
1764	7.35902e-05	1.54267e-05	8.94862e-05	5.9501e-05
1765	7.35902e-05	1.54267e-05	8.93584e-05	5.94584e-05
1766	7.3489e-05	1.54267e-05	8.92305e-05	5.93821e-05
1767	6.81278e-05	1.4685e-05	8.46284e-05	5.58137e-05
1768	6.6307e-05	1.45367e-05	8.16881e-05	5.41773e-05
1769	5.56352e-07	1.48333e-07	3.83512e-07	3.62732e-07
1770	9.0129e-05	4.64284e-05	7.08219e-05	6.91264e-05
1771	9.29613e-05	4.7615e-05	7.17168e-05	7.07644e-05
1772	9.36188e-05	4.77634e-05	7.18446e-05	7.10756e-05
1773	9.38717e-05	4.77634e-05	7.21003e-05	7.12451e-05
1774	9.39223e-05	4.77634e-05	7.21003e-05	7.1262e-05
1775	9.39223e-05	4.79117e-05	7.21003e-05	7.13114e-05
1776	9.39223e-05	4.79117e-05	7.21003e-05	7.13114e-05
1777	9.39223e-05	4.79117e-05	7.21003e-05	7.13114e-05
1778	9.39223e-05	4.79117e-05	7.21003e-05	7.13114e-05
1779	9.39223e-05	4.79117e-05	7.21003e-05	7.13114e-05
1780	9.39729e-05	4.79117e-05	7.21003e-05	7.13283e-05
1781	9.4074e-05	4.79117e-05	7.21003e-05	7.1362e-05
1782	9.4074e-05	4.79117e-05	7.21003e-05	7.1362e-05
1783	9.4074e-05	4.79117e-05	7.21003e-05	7.1362e-05
1784	9.4074e-05	4.79117e-05	7.21003e-05	7.1362e-05
1785	9.4074e-05	4.806e-05	7.21003e-05	7.14115e-05
1786	9.4074e-05	4.806e-05	7.21003e-05	7.14115e-05
1787	9.4074e-05	4.806e-05	7.21003e-05	7.14115e-05
1788	9.42258e-05	4.806e-05	7.22281e-05	7.15046e-05
1789	9.1444e-05	4.65767e-05	7.13333e-05	6.97847e-05
1790	8.43126e-05	4.12367e-05	6.72425e-05	6.42639e-05
1791	7.94066e-05	3.81217e-05	6.55806e-05	6.10363e-05
1792	7.35396e-05	3.45617e-05	6.22568e-05	5.6786e-05
1793	5.88216e-05	2.67e-05	5.40752e-05	4.65323e-05
1794	3.26224e-05	1.691e-05	3.64337e-05	2.86554e-05
1795	3.70733e-05	1.8245e-05	3.70729e-05	3.0797e-05
1796	3.41398e-05	1.76517e-05	3.59223e-05	2.92379e-05
1797	3.45444e-05	1.80967e-05	3.59223e-05	2.95211e-05
1798	3.31788e-05	1.78e-05	3.46439e-05	2.85409e-05
1799	1.69434e-05	1.00867e-05	1.24002e-05	1.31434e-05
1800	1.95735e-05	1.08283e-05	1.27837e-05	1.43952e-05
1801	1.9624e-05	1.08283e-05	1.27837e-05	1.4412e-05
1802	1.95229e-05	1.08283e-05	1.27837e-05	1.43783e-05
1803	1.64882e-05	8.30667e-06	1.03548e-05	1.17166e-05
1804	1.13293e-05	5.04334e-06	7.03106e-06	7.80125e-06
1805	1.21386e-05	6.37834e-06	8.69294e-06	9.06996e-06
1806	1.21386e-05	6.37834e-06	8.56511e-06	9.02734e-06
1807	1.21892e-05	6.37834e-06	8.56511e-06	9.0442e-06
1808	1.21892e-05	6.37834e-06	8.56511e-06	9.0442e-06
1809	1.18857e-05	6.23001e-06	6.51971e-06	8.2118e-06
1810	1.11776e-05	6.23001e-06	6.00836e-06	7.80533e-06
1811	1.16834e-05	6.37834e-06	1.11219e-05	9.72786e-06
1812	1.1734e-05	6.37834e-06	1.08662e-05	9.65949e-06
1813	1.06213e-05	6.08167e-06	9.45997e-06	8.72097e-06
1814	1.2088e-05	6.82334e-06	2.05818e-05	1.31644e-05
1815	1.2088e-05	6.82334e-06	2.13488e-05	1.34201e-05
1816	1.2088e-05	6.82334e-06	2.14767e-05	1.34627e-05
1817	1.2088e-05	6.82334e-06	2.17324e-05	1.35479e-05
1818	1.20374e-05	6.82334e-06	2.16045e-05	1.34884e-05
1819	1.12282e-05	5.34e-06	2.09653e-05	1.25112e-05
1820	1.2088e-05	5.34e-06	2.50561e-05	1.41614e-05
1821	1.19363e-05	5.04334e-06	2.50561e-05	1.40119e-05
1822	9.20509e-06	3.85667e-06	2.48005e-05	1.26207e-05
1823	2.16977e-05	1.2905e-05	5.16463e-05	2.87497e-05
1824	2.23046e-05	1.2905e-05	5.22855e-05	2.91651e-05
1825	2.30127e-05	1.2905e-05	5.33082e-05	2.9742e-05
1826	2.3215e-05	1.2905e-05	5.33082e-05	2.98094e-05
1827	2.3215e-05	1.2905e-05	5.33082e-05	2.98094e-05
1828	2.32656e-05	1.2905e-05	5.33082e-05	2.98263e-05
1829	2.32656e-05	1.2905e-05	5.33082e-05	2.98263e-05
1830	2.36197e-05	1.2905e-05	5.40752e-05	3.02e-05
1831	2.36702e-05	1.2905e-05	5.40752e-05	3.02168e-05
1832	2.38725e-05	1.2905e-05	5.42031e-05	3.03269e-05
1833	2.4176e-05	1.2905e-05	5.43309e-05	3.04706e-05
1834	2.39737e-05	1.26083e-05	5.43309e-05	3.03043e-05
1835	2.38725e-05	1.246e-05	5.43309e-05	3.02212e-05
1836	2.57945e-05	1.26083e-05	5.49701e-05	3.11243e-05
1837	2.58956e-05	1.26083e-05	5.50979e-05	3.12006e-05
1838	2.58956e-05	1.26083e-05	5.50979e-05	3.12006e-05
1839	2.59462e-05	1.26083e-05	5.50979e-05	3.12175e-05
1840	2.6098e-05	1.246e-05	5.50979e-05	3.12186e-05
1841	2.60474e-05	1.21633e-05	5.50979e-05	3.11029e-05
1842	2.59968e-05	1.21633e-05	5.49701e-05	3.10434e-05
1843	2.58451e-05	1.21633e-05	5.49701e-05	3.09928e-05
1844	2.58451e-05	1.21633e-05	5.49701e-05	3.09928e-05
1845	2.57945e-05	1.21633e-05	5.49701e-05	3.0976e-05
1846	2.55416e-05	1.21633e-05	5.44587e-05	3.07212e-05
1847	2.5491e-05	1.21633e-05	5.43309e-05	3.06618e-05
1848	2.38725e-05	1.17183e-05	5.1135e-05	2.89086e-05
1849	2.3822e-05	1.17183e-05	5.07515e-05	2.87639e-05
1850	2.2861e-05	1.12733e-05	4.81947e-05	2.7443e-05
1851	2.20012e-05	1.12733e-05	4.60215e-05	2.6432e-05
1852	4.09677e-06	3.115e-06	3.32377e-06	3.51185e-06
1853	5.10832e-06	5.04334e-06	4.72998e-06	4.96055e-06
1854	5.05774e-06	5.04334e-06	4.72998e-06	4.94369e-06
1855	2.93349e-06	4.005e-06	4.21863e-06	3.71904e-06
1856	6.42333e-06	1.12733e-05	7.41457e-06	8.37042e-06
1857	6.77738e-06	1.246e-05	7.67024e-06	8.96921e-06
1858	6.7268e-06	1.26083e-05	7.67024e-06	9.0018e-06
1859	6.7268e-06	1.2905e-05	7.54241e-06	9.05807e-06
1860	6.77738e-06	1.32017e-05	7.67024e-06	9.21643e-06
1861	6.87853e-06	1.335e-05	7.67024e-06	9.2996e-06
1862	6.82795e-06	1.36467e-05	7.67024e-06	9.38163e-06
1863	6.7268e-06	1.34983e-05	7.67024e-06	9.29846e-06
1864	6.77738e-06	1.335e-05	7.41457e-06	9.18065e-06
1865	6.52449e-06	1.27567e-05	6.90322e-06	8.72813e-06
1866	6.7268e-06	1.157e-05	6.39187e-06	8.22956e-06
1867	1.927e-05	1.7355e-05	1.18889e-05	1.61713e-05
1868	1.9624e-05	1.75033e-05	1.24002e-05	1.65092e-05
1869	1.99781e-05	1.79483e-05	1.24002e-05	1.67756e-05
1870	2.00287e-05	1.79483e-05	1.24002e-05	1.67924e-05
1871	2.00287e-05	1.80967e-05	1.24002e-05	1.68419e-05
1872	2.00792e-05	1.76517e-05	1.1761e-05	1.64973e-05
1873	4.38001e-05	3.90117e-05	1.89199e-05	3.39106e-05
1874	4.46093e-05	3.93084e-05	1.90478e-05	3.43218e-05
1875	4.49128e-05	3.9605e-05	1.90478e-05	3.45219e-05
1876	4.51151e-05	3.97534e-05	1.90478e-05	3.46387e-05
1877	4.52162e-05	3.97534e-05	1.90478e-05	3.46725e-05
1878	4.47105e-05	3.827e-05	1.86643e-05	3.38816e-05
1879	4.47105e-05	3.79734e-05	1.85364e-05	3.37401e-05
1880	4.50139e-05	3.90117e-05	1.86643e-05	3.423e-05
1881	4.50645e-05	3.90117e-05	1.85364e-05	3.42042e-05
1882	4.43564e-05	3.81217e-05	1.75137e-05	3.33306e-05
1883	5.04763e-05	4.24234e-05	1.86643e-05	3.7188e-05
1884	5.05774e-05	4.2275e-05	1.87921e-05	3.72149e-05
1885	5.05774e-05	4.2275e-05	1.85364e-05	3.71296e-05
1886	4.74416e-05	4.06434e-05	1.71302e-05	3.50717e-05
1887	5.21453e-05	4.33134e-05	1.82808e-05	3.79132e-05
1888	5.21959e-05	4.3165e-05	1.82808e-05	3.78806e-05
1889	5.21453e-05	4.3165e-05	1.82808e-05	3.78637e-05
1890	5.17407e-05	4.3165e-05	1.81529e-05	3.76862e-05
1891	5.1589e-05	4.28684e-05	1.80251e-05	3.74941e-05
1892	5.14878e-05	4.28684e-05	1.80251e-05	3.74604e-05
1893	4.55197e-05	3.93084e-05	1.68745e-05	3.39009e-05
1894	3.73261e-05	3.17434e-05	1.47013e-05	2.79236e-05
1895	3.52019e-05	3.115e-05	1.47013e-05	2.70177e-05
1896	1.85113e-05	1.424e-05	6.1362e-06	1.29625e-05
1897	2.24564e-05	2.52167e-05	7.92592e-06	1.8533e-05
1898	2.17989e-05	2.61067e-05	7.54241e-06	1.84827e-05
1899	2.08885e-05	2.581e-05	7.92592e-06	1.82081e-05
1900	2.07873e-05	2.81834e-05	8.56511e-06	1.91786e-05
1901	1.99275e-05	2.95184e-05	8.82078e-06	1.94222e-05
1902	1.94723e-05	2.95184e-05	9.07646e-06	1.93557e-05
1903	1.40099e-05	2.55134e-05	6.77538e-06	1.54329e-05
1904	2.07367e-05	4.65767e-05	1.0994e-05	2.61025e-05
1905	2.08379e-05	4.65767e-05	1.11219e-05	2.61788e-05
1906	2.08885e-05	4.68734e-05	1.11219e-05	2.62946e-05
1907	2.14448e-05	4.717e-05	1.13775e-05	2.66641e-05
1908	2.17483e-05	4.717e-05	1.13775e-05	2.67653e-05
1909	2.13437e-05	4.68734e-05	1.13775e-05	2.65315e-05
1910	2.12425e-05	4.70217e-05	1.13775e-05	2.65473e-05
1911	2.09391e-05	4.68734e-05	1.15054e-05	2.64393e-05
1912	1.83596e-05	4.55384e-05	1.07383e-05	2.48788e-05
1913	1.66906e-05	4.28684e-05	1.00992e-05	2.32194e-05
1914	1.99781e-05	4.628e-05	1.0994e-05	2.57507e-05
1915	1.99781e-05	4.628e-05	1.0994e-05	2.57507e-05
1916	2.00792e-05	4.65767e-05	1.0994e-05	2.58833e-05
1917	1.87642e-05	4.19784e-05	1.06105e-05	2.37844e-05
1918	1.64377e-05	3.76767e-05	1.04827e-05	2.15323e-05
1919	2.10908e-05	4.88017e-05	1.08662e-05	2.69196e-05
1920	2.09391e-05	4.82084e-05	1.08662e-05	2.66712e-05
1921	2.15966e-05	4.83567e-05	1.13775e-05	2.71103e-05
1922	2.18495e-05	4.90984e-05	1.18889e-05	2.76122e-05
1923	2.19e-05	4.806e-05	1.18889e-05	2.7283e-05
1924	2.1546e-05	4.628e-05	1.16332e-05	2.64864e-05
1925	2.09896e-05	4.37584e-05	1.12497e-05	2.53326e-05
1926	2.09391e-05	4.34617e-05	1.12497e-05	2.52168e-05
1927	2.07367e-05	4.21267e-05	1.12497e-05	2.47044e-05
1928	1.76009e-05	3.649e-05	9.97132e-06	2.13541e-05
1929	1.76009e-05	3.649e-05	9.97132e-06	2.13541e-05
1930	1.74492e-05	3.61934e-05	9.97132e-06	2.12046e-05
1931	1.61848e-05	3.26334e-05	8.30943e-06	1.90425e-05
1932	1.61848e-05	3.26334e-05	8.30943e-06	1.90425e-05
1933	1.59825e-05	3.21884e-05	8.30943e-06	1.88268e-05
1934	1.45663e-05	2.96667e-05	7.28673e-06	1.71732e-05
1935	1.39594e-05	2.87767e-05	6.64755e-06	1.64612e-05
1936	1.30996e-05	2.78867e-05	6.39187e-06	1.57927e-05
1937	1.27961e-05	2.74417e-05	6.39187e-06	1.55432e-05
1938	1.00649e-05	2.23984e-05	5.75268e-06	1.27386e-05
1939	7.94066e-06	1.602e-05	4.98566e-06	9.64878e-06
1940	7.63719e-06	1.58717e-05	4.47431e-06	9.32773e-06
1941	4.7037e-06	8.75167e-06	2.81242e-06	5.4226e-06
1942	1.61848e-06	2.96667e-06	1.15054e-06	1.91189e-06
1943	1.66906e-06	2.96667e-06	1.15054e-06	1.92875e-06
1944	5.56352e-07	8.90001e-07	5.1135e-07	6.52567e-07
1945	1.66906e-06	1.63167e-06	3.83512e-07	1.22808e-06
1946	2.27598e-06	1.78e-06	7.67024e-07	1.60767e-06
1947	2.47829e-06	1.03833e-06	6.39187e-07	1.38527e-06
1948	5.61409e-06	4.45e-06	2.42891e-06	4.16434e-06
1949	5.96814e-06	4.895e-06	2.30107e-06	4.38807e-06
1950	5.91756e-06	4.895e-06	2.42891e-06	4.41382e-06
1951	5.91756e-06	5.34e-06	2.55675e-06	4.60477e-06
1952	5.96814e-06	5.34e-06	2.55675e-06	4.62163e-06
1953	5.96814e-06	5.34e-06	2.55675e-06	4.62163e-06
1954	1.48698e-05	6.52667e-06	5.62485e-06	9.00709e-06
1955	1.51732e-05	6.52667e-06	5.62485e-06	9.10825e-06
1956	1.54261e-05	6.52667e-06	5.62485e-06	9.19255e-06
1957	1.5679e-05	6.52667e-06	5.62485e-06	9.27684e-06
1958	1.57296e-05	6.52667e-06	5.62485e-06	9.2937e-06
1959	1.57296e-05	6.52667e-06	5.62485e-06	9.2937e-06
1960	1.57296e-05	6.52667e-06	5.62485e-06	9.2937e-06
1961	1.57296e-05	6.52667e-06	5.49701e-06	9.25109e-06
1962	1.57296e-05	6.52667e-06	5.62485e-06	9.2937e-06
1963	1.57296e-05	6.52667e-06	5.62485e-06	9.2937e-06
1964	1.57296e-05	6.37834e-06	5.75268e-06	9.28687e-06
1965	1.41617e-05	5.78501e-06	5.62485e-06	8.52384e-06
1966	1.62354e-05	7.41667e-06	6.39187e-06	1.00146e-05
1967	1.62859e-05	7.41667e-06	6.39187e-06	1.00315e-05
1968	1.63365e-05	7.41667e-06	6.39187e-06	1.00484e-05
1969	1.63365e-05	7.41667e-06	6.39187e-06	1.00484e-05
1970	1.63365e-05	7.41667e-06	6.39187e-06	1.00484e-05
1971	1.58307e-05	7.26834e-06	6.26403e-06	9.7877e-06
1972	1.58307e-05	7.26834e-06	6.26403e-06	9.7877e-06
1973	1.57802e-05	7.12001e-06	6.26403e-06	9.7214e-06
1974	1.42123e-05	6.37834e-06	5.62485e-06	8.73848e-06
1975	1.13799e-05	5.04334e-06	4.72998e-06	7.05108e-06
1976	1.0773e-05	4.74667e-06	4.34647e-06	6.62205e-06
1977	3.48984e-06	2.52167e-06	2.55675e-06	2.85609e-06
1978	3.99562e-06	2.52167e-06	2.81242e-06	3.1099e-06
1979	3.84388e-06	2.37334e-06	2.55675e-06	2.92466e-06
1980	3.43927e-06	1.78e-06	2.17324e-06	2.46417e-06
1981	5.1589e-06	2.225e-06	2.81242e-06	3.39877e-06
1982	5.20948e-06	2.225e-06	2.81242e-06	3.41563e-06
1983	5.05774e-06	2.07667e-06	2.68459e-06	3.273e-06
1984	6.2716e-06	2.81834e-06	4.0908e-06	4.39358e-06
1985	6.2716e-06	2.81834e-06	4.0908e-06	4.39358e-06
1986	5.20948e-06	1.63167e-06	3.96296e-06	3.60137e-06
1987	8.39585e-06	2.81834e-06	5.75268e-06	5.65562e-06
1988	8.44643e-06	2.81834e-06	5.75268e-06	5.67248e-06
1989	8.49701e-06	2.81834e-06	5.75268e-06	5.68934e-06
1990	8.49701e-06	2.81834e-06	5.75268e-06	5.68934e-06
1991	8.49701e-06	2.81834e-06	5.75268e-06	5.68934e-06
1992	8.2947e-06	2.67e-06	4.98566e-06	5.31679e-06
1993	9.66029e-06	2.67e-06	5.75268e-06	6.02766e-06
1994	9.60971e-06	2.67e-06	5.75268e-06	6.0108e-06
1995	9.71087e-06	2.67e-06	5.75268e-06	6.04452e-06
1996	9.10394e-06	2.67e-06	5.62485e-06	5.7996e-06
1997	9.76144e-06	2.81834e-06	5.62485e-06	6.06821e-06
1998	9.76144e-06	2.81834e-06	5.62485e-06	6.06821e-06
1999	9.20509e-06	2.81834e-06	5.49701e-06	5.84015e-06
[truncated: 7,180 more rows]

## Sheet: CANC_K227A
bp	CLIP28_density	CLIP46_density	CLIP48_density	CLIP54_density	average
1	9.16035e-06	2.96729e-06	2.64409e-07	1.43289e-05	6.68025e-06
2	1.88556e-05	5.05539e-06	5.28819e-07	2.21075e-05	1.16368e-05
3	2.08615e-05	5.44004e-06	5.28819e-07	2.45639e-05	1.28486e-05
4	3.49029e-05	6.92369e-06	5.28819e-07	2.88626e-05	1.78045e-05
5	3.91822e-05	7.47319e-06	7.93228e-07	3.07049e-05	1.95384e-05
6	4.38627e-05	8.18753e-06	7.93228e-07	3.23425e-05	2.12965e-05
7	4.57349e-05	8.46228e-06	1.05764e-06	3.31613e-05	2.2104e-05
8	5.34911e-05	1.00009e-05	2.11528e-06	3.47989e-05	2.51015e-05
9	6.45905e-05	1.05504e-05	2.9085e-06	3.90975e-05	2.92867e-05
10	7.70272e-05	1.14845e-05	3.17291e-06	4.48291e-05	3.41284e-05
11	8.04373e-05	1.19791e-05	3.17291e-06	4.68761e-05	3.56163e-05
12	8.09722e-05	1.21439e-05	3.17291e-06	4.76949e-05	3.5996e-05
13	8.15739e-05	1.22538e-05	3.17291e-06	4.78996e-05	3.62251e-05
14	0.000126172	2.69254e-05	1.48069e-05	8.82253e-05	6.40325e-05
15	0.00012878	2.72002e-05	1.48069e-05	0.000101326	6.80283e-05
16	0.000130719	2.79695e-05	1.50713e-05	0.000102145	6.89762e-05
17	0.000131588	2.80794e-05	1.50713e-05	0.000102964	6.94256e-05
18	0.000132925	2.86838e-05	1.53357e-05	0.000104601	7.03866e-05
19	0.000156194	4.02783e-05	2.35324e-05	0.00011238	8.30961e-05
20	0.00015713	4.09377e-05	2.35324e-05	0.000114017	8.39044e-05
21	0.000159136	4.45644e-05	2.40613e-05	0.000115041	8.57007e-05
22	0.000158601	4.51139e-05	2.45901e-05	0.000112994	8.53248e-05
23	0.000224529	5.61588e-05	3.12003e-05	0.000140628	0.000113129
24	0.000339535	7.39626e-05	3.56953e-05	0.000208588	0.000164445
25	0.000360463	7.53363e-05	3.67529e-05	0.000230082	0.000175659
26	0.000364475	7.58858e-05	3.67529e-05	0.000233152	0.000177567
27	0.000368219	7.62705e-05	3.67529e-05	0.000235609	0.000179213
28	0.00036735	7.63804e-05	3.67529e-05	0.000235404	0.000178972
29	0.000368888	7.6765e-05	3.72817e-05	0.000234995	0.000179482
30	0.000323354	7.25888e-05	3.67529e-05	0.000208588	0.000160321
31	0.000515253	9.2151e-05	4.15123e-05	0.000287602	0.00023413
32	0.000547013	9.55579e-05	4.17767e-05	0.000312576	0.000249231
33	0.000560386	9.86351e-05	4.20411e-05	0.000318921	0.000254996
34	0.000569948	0.000103471	4.44208e-05	0.000322401	0.00026006
35	0.000571419	0.000103745	4.44208e-05	0.000323015	0.00026065
36	0.00057075	0.000103581	4.25699e-05	0.000322401	0.000259825
37	0.0006104	0.000110229	4.15123e-05	0.000337549	0.000274923
38	0.000689768	0.000124681	4.54784e-05	0.000378284	0.000309553
39	0.000724136	0.000128858	4.57428e-05	0.000400392	0.000324782
40	0.000730354	0.000127978	4.60072e-05	0.000403053	0.000326848
41	0.000728883	0.000122923	4.3892e-05	0.000399573	0.000323818
42	0.000731157	0.000123253	4.41564e-05	0.000401006	0.000324893
43	0.00073109	0.000123198	4.41564e-05	0.000401006	0.000324862
44	0.000716447	0.000119681	4.09835e-05	0.00039118	0.000317073
45	0.00066904	0.000103196	2.88206e-05	0.000338572	0.000284907
46	0.000695786	0.000109735	3.01427e-05	0.000346556	0.000295555
47	0.000703274	0.000112043	3.04071e-05	0.000351878	0.000299401
48	0.000698326	0.00010979	2.9085e-05	0.000352083	0.000297321
49	0.000694515	0.000108691	2.93494e-05	0.000348398	0.000295238
50	0.000715912	0.000111658	2.98783e-05	0.000353311	0.00030269
51	0.00071297	0.000111164	2.98783e-05	0.000352287	0.000301575
52	0.000712769	0.000111164	2.96139e-05	0.000352287	0.000301458
53	0.000711365	0.000111054	2.96139e-05	0.00035065	0.000300671
54	0.000709961	0.000110999	2.98783e-05	0.000349831	0.000300167
55	0.000708557	0.000110889	2.98783e-05	0.000350036	0.00029984
56	0.000662153	0.000105833	2.64409e-05	0.000332636	0.000281766
57	0.000607124	0.000100064	2.1946e-05	0.000310529	0.000259916
58	0.000463835	8.43481e-05	1.77154e-05	0.000222917	0.000197204
59	0.000460024	8.42931e-05	1.77154e-05	0.000221894	0.000195982
60	0.000339602	7.03908e-05	1.6129e-05	0.000176451	0.000150643
61	0.00028591	6.22582e-05	1.50713e-05	0.000151682	0.00012873
62	0.000270197	5.94558e-05	1.48069e-05	0.000143494	0.000121988
63	0.000247196	5.57192e-05	1.37493e-05	0.000132031	0.000112174
64	0.000233689	5.28618e-05	1.34849e-05	0.000124457	0.000106123
65	0.000185347	3.93991e-05	8.72551e-06	9.29334e-05	8.16012e-05
66	0.000184277	4.18169e-05	9.78315e-06	9.49804e-05	8.27143e-05
67	0.000183809	4.19268e-05	9.78315e-06	9.55945e-05	8.27783e-05
68	0.000181937	4.14872e-05	9.78315e-06	9.41616e-05	8.18421e-05
69	0.000125236	2.88487e-05	6.34583e-06	6.40708e-05	5.61254e-05
70	0.000119954	2.742e-05	5.81701e-06	6.34567e-05	5.41619e-05
71	0.000110192	2.50572e-05	4.75937e-06	5.95675e-05	4.98939e-05
72	8.72574e-05	1.7529e-05	3.43732e-06	5.42453e-05	4.06172e-05
73	8.83272e-05	2.43428e-05	3.70173e-06	5.52688e-05	4.29101e-05
74	9.04668e-05	3.3959e-05	6.08142e-06	5.91581e-05	4.74163e-05
75	4.70053e-05	3.35744e-05	7.66787e-06	3.50036e-05	3.08128e-05
76	0.000102435	0.000138968	8.85772e-05	9.53898e-05	0.000106343
77	0.000101566	0.000141606	8.98992e-05	0.000104192	0.000109316
78	0.000101098	0.000141826	9.06924e-05	0.000103987	0.000109401
79	0.000101031	0.000141881	9.09569e-05	0.000104397	0.000109566
80	8.93302e-05	0.000141716	9.12213e-05	9.8665e-05	0.000105233
81	8.91964e-05	0.000144189	9.59806e-05	9.90744e-05	0.00010711
82	8.5452e-05	0.000146551	9.86247e-05	9.84603e-05	0.000107272
83	8.82603e-05	0.000150618	0.000101533	0.000101326	0.000110434
84	7.93006e-05	0.000150673	0.000102062	9.76415e-05	0.000107419
85	9.40775e-05	0.000174026	0.000166578	0.000129165	0.000140962
86	0.00010297	0.000182104	0.00017927	0.000147383	0.000152932
87	0.000106915	0.00018694	0.000185087	0.000155981	0.000158731
88	0.000127443	0.000209469	0.000222633	0.000173175	0.00018318
89	0.000128512	0.000211777	0.000224748	0.000178293	0.000185833
90	0.000129248	0.000213041	0.000225806	0.000179931	0.000187006
91	0.000128646	0.000212491	0.000225541	0.000178498	0.000186294
92	0.000131989	0.000216667	0.000232416	0.000182182	0.000190814
93	0.000131254	0.00021359	0.000232416	0.000181978	0.000189809
94	0.00012985	0.000205018	0.000230301	0.000177065	0.000185558
95	0.000112331	0.000165564	0.000224748	0.000144108	0.000161688
96	0.00017398	0.000187104	0.000268376	0.000189551	0.000204753
97	0.000218444	0.000223261	0.000293494	0.00022783	0.000240758
98	0.000220383	0.000226009	0.000294817	0.000236632	0.00024446
99	0.000220517	0.000226009	0.000295081	0.000236837	0.000244611
100	0.00021811	0.000216777	0.000294288	0.000228649	0.000239456
101	0.000510038	0.000491582	0.000854043	0.000492916	0.000587144
102	0.000524213	0.00050499	0.000862239	0.000568245	0.000614922
103	0.000543871	0.00052587	0.000893704	0.000587487	0.000637733
104	0.00071765	0.000634342	0.0010973	0.00072095	0.00079256
105	0.00073109	0.00065275	0.00111369	0.000763528	0.000815265
106	0.00085111	0.000732757	0.00122369	0.000837015	0.000911142
107	0.000858399	0.000736878	0.00122739	0.000855847	0.000919628
108	0.000894505	0.000757924	0.00124008	0.00087775	0.000942565
109	0.000894973	0.000755671	0.00124034	0.000882049	0.000943259
110	0.000900991	0.000767046	0.00125674	0.00088778	0.000953139
111	0.000910686	0.000777486	0.00126335	0.000899448	0.000962742
112	0.000918041	0.000787981	0.00126679	0.000909478	0.000970572
113	0.000915233	0.000783531	0.00126652	0.000904566	0.000967463
114	0.000918242	0.000784849	0.00126969	0.000903747	0.000969133
115	0.000916905	0.000781058	0.0012689	0.000896173	0.000965759
116	0.000928271	0.000788476	0.00127313	0.000903133	0.000973253
117	0.000918108	0.000776002	0.00126256	0.000897606	0.000963568
118	0.000911622	0.000763474	0.00125885	0.000885119	0.000954767
119	0.0009266	0.000767101	0.00126308	0.000893307	0.000962523
120	0.000895976	0.000721822	0.00121258	0.000870176	0.000925139
121	0.000908814	0.000721657	0.00121126	0.000872633	0.000928591
122	0.000884342	0.000676213	0.00117689	0.000843361	0.000895201
123	0.000892299	0.000674565	0.0011753	0.000845203	0.000896842
124	0.000891964	0.000674345	0.0011753	0.000845612	0.000896805
125	0.000857195	0.000648738	0.00116261	0.000831897	0.00087511
126	0.000755629	0.000564775	0.00107271	0.000763118	0.000789058
127	0.000709359	0.000527464	0.00102961	0.000738555	0.000751247
128	0.000632332	0.000463722	0.000938125	0.000677964	0.000678036
129	0.000632466	0.00046103	0.000935481	0.000677759	0.000676684
130	0.000618357	0.000447512	0.000915914	0.0006665	0.000662071
131	0.000312187	0.000177653	0.000435747	0.000341233	0.000316705
132	0.00033238	0.000183203	0.000433367	0.000343485	0.000323109
133	0.000334787	0.000183203	0.000427814	0.000342257	0.000322015
134	0.00028591	0.000151717	0.000307773	0.000251985	0.000249346
135	0.000217441	0.000101932	0.000147805	0.000170924	0.000159526
136	0.000234759	0.000111328	0.00014992	0.000178293	0.000168575
137	0.000226401	0.000101163	0.000126917	0.000167649	0.000155532
138	0.000226602	0.000101163	0.000126917	0.000167649	0.000155582
139	0.000226535	0.000100998	0.000126123	0.000167649	0.000155326
140	0.000226468	0.000100833	0.000125859	0.000166625	0.000154946
141	0.000216438	9.62173e-05	0.000120306	0.000160484	0.000148362
142	0.000195911	9.07223e-05	0.000110259	0.00014943	0.000136581
143	0.000181469	8.68208e-05	0.000104177	0.000142675	0.000128786
144	0.00017525	8.52822e-05	0.000101269	0.0001394	0.0001253
145	0.000155392	7.5721e-05	8.27602e-05	0.000122615	0.000109122
146	0.000119085	5.54994e-05	5.47328e-05	8.78159e-05	7.92832e-05
147	0.000127108	6.43463e-05	6.18718e-05	9.12958e-05	8.61556e-05
148	0.00012664	6.43463e-05	6.18718e-05	9.10911e-05	8.59874e-05
149	0.000126239	6.4676e-05	6.16074e-05	9.08864e-05	8.58522e-05
150	0.000114204	5.87414e-05	5.31463e-05	8.12656e-05	7.68392e-05
151	8.30449e-05	5.03891e-05	3.41088e-05	6.03863e-05	5.69823e-05
152	6.88029e-05	4.74767e-05	3.04071e-05	4.58526e-05	4.81348e-05
153	6.45237e-05	4.79163e-05	3.358e-05	4.23727e-05	4.70982e-05
154	6.28521e-05	4.80262e-05	3.67529e-05	4.33962e-05	4.77568e-05
155	5.46278e-05	4.41797e-05	3.46376e-05	3.68458e-05	4.25727e-05
156	3.65745e-05	3.56625e-05	2.85562e-05	2.37451e-05	3.11346e-05
157	6.45905e-05	6.34671e-05	4.99734e-05	3.90975e-05	5.42821e-05
158	6.55935e-05	6.45112e-05	5.07666e-05	4.66714e-05	5.68857e-05
159	6.35207e-05	6.33572e-05	5.02378e-05	4.58526e-05	5.57421e-05
160	6.21166e-05	6.29726e-05	5.02378e-05	4.54432e-05	5.51925e-05
161	8.4984e-05	7.99521e-05	6.716e-05	5.75205e-05	7.24041e-05
162	8.66556e-05	8.08313e-05	6.87465e-05	6.0591e-05	7.42061e-05
163	8.75917e-05	8.19303e-05	6.95397e-05	6.0591e-05	7.49132e-05
164	9.60834e-05	8.6656e-05	7.64143e-05	6.3252e-05	8.06014e-05
165	9.7287e-05	8.68758e-05	7.66787e-05	6.42755e-05	8.12793e-05
166	0.000108386	9.16015e-05	8.48754e-05	6.87789e-05	8.84105e-05
167	0.000109189	9.23708e-05	8.56687e-05	6.9393e-05	8.91553e-05
168	0.000110192	9.25356e-05	8.56687e-05	6.9393e-05	8.94472e-05
169	0.000110259	9.24257e-05	8.56687e-05	6.9393e-05	8.94365e-05
170	0.000110125	9.24807e-05	8.56687e-05	6.9393e-05	8.94168e-05
171	0.000109991	9.22609e-05	8.56687e-05	6.9393e-05	8.93284e-05
172	0.000106514	8.59966e-05	8.17025e-05	6.65272e-05	8.51851e-05
173	0.000106782	8.48976e-05	8.11737e-05	6.61178e-05	8.47427e-05
174	0.000106113	8.30293e-05	7.85296e-05	6.42755e-05	8.29869e-05
175	0.000105444	8.20951e-05	7.85296e-05	6.42755e-05	8.25862e-05
176	9.8758e-05	7.05007e-05	6.98041e-05	6.10003e-05	7.50158e-05
177	0.000101433	7.44571e-05	7.05973e-05	6.26379e-05	7.72812e-05
178	0.000101299	7.4567e-05	7.03329e-05	6.26379e-05	7.72092e-05
179	8.42485e-05	6.02251e-05	5.26175e-05	5.0356e-05	6.18618e-05
180	9.36763e-05	6.74785e-05	5.65836e-05	5.54735e-05	6.8303e-05
181	9.44787e-05	6.80829e-05	5.65836e-05	5.81346e-05	6.93199e-05
182	9.28739e-05	6.59399e-05	5.42039e-05	5.73158e-05	6.75834e-05
183	9.35426e-05	6.65443e-05	5.34107e-05	5.77252e-05	6.78057e-05
184	9.26065e-05	6.4676e-05	5.18243e-05	5.58829e-05	6.62474e-05
185	9.01994e-05	6.1434e-05	4.91802e-05	5.40406e-05	6.37135e-05
186	9.02662e-05	6.12142e-05	4.89157e-05	5.42453e-05	6.36604e-05
187	8.61207e-05	5.69281e-05	4.5214e-05	4.87184e-05	5.92453e-05
188	7.74284e-05	5.2642e-05	3.96614e-05	4.46244e-05	5.35891e-05
189	6.39887e-05	4.51139e-05	3.358e-05	3.68458e-05	4.48821e-05
190	6.65964e-05	4.7202e-05	3.38444e-05	3.97116e-05	4.68386e-05
191	6.64627e-05	4.68173e-05	3.30512e-05	3.95069e-05	4.64595e-05
192	6.60615e-05	4.65426e-05	3.25224e-05	3.95069e-05	4.61583e-05
193	3.40337e-05	3.02774e-05	1.85087e-05	2.06746e-05	2.58736e-05
194	0.000140013	0.000100503	9.86247e-05	9.37522e-05	0.000108223
195	0.000142019	0.000101328	9.91535e-05	0.000109719	0.000113055
196	0.000142754	0.000101767	9.96824e-05	0.000111561	0.000113941
197	0.000143356	0.000101932	9.96824e-05	0.000111561	0.000114133
198	0.00014349	0.000102042	9.96824e-05	0.000111561	0.000114194
199	0.000142019	0.000101383	9.91535e-05	0.000110742	0.000113324
200	0.000142487	0.000101547	9.99468e-05	0.000109719	0.000113425
201	0.00014349	0.000100284	0.000100211	0.000108081	0.000113016
202	0.000185948	0.000131165	0.000139079	0.000130393	0.000146647
203	0.000191498	0.000138529	0.000144632	0.000138991	0.000153412
204	0.000191832	0.000138144	0.000144103	0.000138581	0.000153165
205	0.000193103	0.000138309	0.000144103	0.0001394	0.000153729
206	0.000193304	0.000138199	0.00014331	0.000139195	0.000153502
207	0.000184344	0.000132045	0.000137493	0.000135511	0.000147348
208	0.000251809	0.000176224	0.000174246	0.00017338	0.000193915
209	0.000258429	0.000181829	0.000176361	0.000183206	0.000199956
210	0.000261237	0.000182599	0.000177154	0.000186481	0.000201868
211	0.000265316	0.000184687	0.000179798	0.00019078	0.000205145
212	0.000278488	0.000196995	0.000189846	0.000201629	0.00021674
213	0.000252612	0.000170455	0.000147012	0.000169082	0.00018479
214	0.000377514	0.000284036	0.000253569	0.000298656	0.000303444
215	0.000382395	0.000286344	0.000254362	0.000329361	0.000313115
216	0.000384267	0.000287003	0.000254891	0.00033325	0.000314853
217	0.000385203	0.000286674	0.000254891	0.000332431	0.0003148
218	0.000374438	0.000280299	0.000245108	0.000325676	0.00030638
219	0.000366949	0.000275629	0.000240084	0.000321992	0.000301163
220	0.000442639	0.000317116	0.000359332	0.000377261	0.000374087
221	0.000444645	0.000319259	0.000361977	0.00039466	0.000380135
222	0.000448189	0.000321732	0.000367529	0.000398754	0.000384051
223	0.000448523	0.000321787	0.000367529	0.000399573	0.000384353
224	0.000442773	0.000314643	0.000365414	0.000393227	0.000379014
225	0.000443441	0.000315138	0.000365943	0.000393432	0.000379488
226	0.000444043	0.000315357	0.000365943	0.000393227	0.000379643
227	0.00044518	0.000316072	0.000366736	0.000392818	0.000380201
228	0.000435418	0.000308269	0.000365414	0.000380331	0.000372358
229	0.000449125	0.000316347	0.000386038	0.000387905	0.000384853
230	0.000455209	0.000317775	0.000397407	0.000395274	0.000391417
231	0.00047908	0.000326622	0.000419882	0.000408784	0.000408592
232	0.000475536	0.000321951	0.000421204	0.000412878	0.000407892
233	0.000469853	0.000312335	0.000429137	0.000407761	0.000404771
234	0.000496932	0.000322666	0.000435482	0.000427412	0.000420623
235	0.000497534	0.000320688	0.000435218	0.000429254	0.000420673
236	0.000446718	0.000288652	0.000415123	0.000387496	0.000384497
237	0.000467312	0.000296949	0.000417238	0.000397935	0.000394859
238	0.000432476	0.000270189	0.000400316	0.000382173	0.000371288
239	0.00053558	0.000307994	0.000419882	0.000438056	0.000425378
240	0.000538121	0.000308709	0.000419618	0.000448496	0.000428736
241	0.000539792	0.000307884	0.000417767	0.000447882	0.000428331
242	0.00054026	0.000307829	0.000417767	0.000448291	0.000428537
243	0.000530164	0.000302664	0.000413272	0.000441127	0.000421807
244	0.000517727	0.000292498	0.000399523	0.000434781	0.000411132
245	0.000513448	0.000289366	0.000390533	0.000433962	0.000406827
246	0.000516122	0.000291344	0.000391062	0.000434576	0.000408276
247	0.000516189	0.000291454	0.000391062	0.000434372	0.000408269
248	0.000511174	0.00029019	0.000390004	0.000433758	0.000406282
249	0.000508366	0.000287553	0.000385773	0.000431915	0.000403402
250	0.000496264	0.000281453	0.000380485	0.000425774	0.000395994
251	0.00049613	0.000281014	0.000379956	0.000425365	0.000395616
252	0.000478144	0.000270353	0.000367	0.000413492	0.000382247
253	0.000454273	0.000256891	0.000352987	0.000404486	0.000367159
254	0.000453605	0.000255297	0.0003514	0.00040121	0.000365378
255	0.000442238	0.000237933	0.000329983	0.000366411	0.000344141
256	0.000442104	0.000237658	0.000329454	0.000366002	0.000343805
257	0.000434147	0.000228372	0.000317556	0.000352083	0.000333039
258	0.000263644	0.000150233	0.000199629	0.000209817	0.000205831
259	0.000256824	0.00013666	0.000193019	0.000189551	0.000194014
260	0.000172977	9.18762e-05	0.000120042	0.000115041	0.000124984
261	0.000171038	9.1052e-05	0.00011872	0.000114836	0.000123911
262	9.06006e-05	4.29159e-05	3.01427e-05	4.81043e-05	5.29409e-05
263	0.000113401	5.53345e-05	6.90109e-05	6.98024e-05	7.68872e-05
264	0.000101366	4.95099e-05	6.66312e-05	7.02118e-05	7.19296e-05
265	0.000110593	5.39608e-05	7.13906e-05	7.51246e-05	7.77672e-05
266	0.000110459	5.38509e-05	7.11261e-05	7.57387e-05	7.77937e-05
267	8.33124e-05	4.19268e-05	6.02854e-05	6.59131e-05	6.28594e-05
268	0.000163014	6.63795e-05	9.70383e-05	8.59736e-05	0.000103101
269	0.000165889	6.79181e-05	9.83603e-05	9.35475e-05	0.000106429
270	0.000164218	6.6929e-05	9.57162e-05	9.31381e-05	0.000105
271	0.000165622	6.75884e-05	9.6245e-05	9.37522e-05	0.000105802
272	0.000165555	6.75334e-05	9.6245e-05	9.41616e-05	0.000105874
273	0.000165354	6.76433e-05	9.6245e-05	9.41616e-05	0.000105851
274	0.000160473	6.51706e-05	9.43942e-05	9.19099e-05	0.000102987
275	0.000172041	6.88522e-05	9.75671e-05	9.64133e-05	0.000108718
276	0.000172977	6.92918e-05	9.86247e-05	9.80509e-05	0.000109736
277	0.000172643	6.9127e-05	9.86247e-05	9.82556e-05	0.000109662
278	0.000172643	6.92369e-05	9.86247e-05	9.80509e-05	0.000109639
279	0.000172643	6.92369e-05	9.86247e-05	9.82556e-05	0.00010969
280	0.000172643	6.91819e-05	9.86247e-05	9.8665e-05	0.000109779
281	0.000171439	6.87973e-05	9.86247e-05	9.80509e-05	0.000109228
282	0.000171506	6.87423e-05	9.86247e-05	9.84603e-05	0.000109333
283	0.000170436	6.81379e-05	9.73027e-05	9.78462e-05	0.000108431
284	0.000164819	6.67092e-05	9.67739e-05	9.55945e-05	0.000105974
285	0.000166959	6.72037e-05	9.91535e-05	9.55945e-05	0.000107228
286	0.000166892	6.72037e-05	9.91535e-05	9.55945e-05	0.000107211
287	0.000160005	6.5775e-05	9.83603e-05	9.27287e-05	0.000104217
288	0.000154589	6.44562e-05	9.70383e-05	8.96582e-05	0.000101436
289	0.000159136	6.63245e-05	9.73027e-05	9.17052e-05	0.000103617
290	0.000158133	6.53904e-05	9.73027e-05	9.08864e-05	0.000102928
291	0.000139746	5.64335e-05	9.25433e-05	7.61481e-05	9.12176e-05
292	0.00018548	0.000102591	0.0001835	0.000105829	0.00014435
293	0.000187018	0.000104789	0.000186409	0.000113199	0.000147854
294	0.000187219	0.000105559	0.000187202	0.000113813	0.000148448
295	0.000153453	8.83045e-05	0.000161819	9.19099e-05	0.000123871
296	0.00023048	0.000155343	0.000273664	0.000127528	0.000196754
297	0.000229009	0.000154629	0.000274457	0.000136944	0.00019876
298	0.000240509	0.000163091	0.000285562	0.000141857	0.000207755
299	0.000238838	0.000161608	0.000283447	0.000141652	0.000206386
[truncated: 8,880 more rows]

## Sheet: CANC_K227A_SP1_T8I
bp	CLIP46_density	CLIP48_density	CLIP51_density	average
[truncated: 9,175 more rows]
